# Supplementary material for: In vivo proximity labeling identifies cardiomyocyte protein networks during zebrafish heart regeneration
Source: eLife journal article supplement (doi:10.7554/elife.66079), 2021-03-25
Supplement: supp [file elife-66079-supp-v1.zip]

A

|                                          |                                                                        |     |
|------------------------------------------|------------------------------------------------------------------------|-----|
| zRhoAa                                   | MAAIRKKLVIVGDGACGKTCLLIVFSKDQFPEVYVPTVVFENYVADIEVDSKQVELALWDT          | 60  |
| zRhoAc                                   | MAAIRKKLVIVGDGACGKTCLLIVFSKDQFPEVYVPTVVFENYVADIEVDSKQVELALWDT          | 60  |
| RhoA_antibody_immunogen (human120-150aa) | -----                                                                  | 0   |
| zRhoAb                                   | MAAIRKKLVIVGDGACGKTCLLIVFSKDQFPEVYVPTVVFENYVADIEVDSKQVELALWDT          | 60  |
|                                          |                                                                        |     |
| zRhoAa                                   | AGQEDYDRLRPLSYPD TDVILMCF SIDSPDSLENIPEKWTPEVKHF C PNVPIILVGNKKD       | 120 |
| zRhoAc                                   | AGQEDYDRLRPLSYPD TDVILMCF SIDSPDSLENIPEKWTPEVKHF C PNVPIILVGNKKD       | 120 |
| RhoA_antibody_immunogen (human120-150aa) | -----                                                                  | 0   |
| zRhoAb                                   | AGQEDYDRLRPLSYPD TDVILMCF SIDSPDSLENIPEKWTPEVKHF C PNVPIILVGNKKD       | 120 |
|                                          |                                                                        |     |
| zRhoAa                                   | LRNDEHTRRELQKMKQEPVKPEEGRDMANRINAFGYLECSAKTKEGVREVFEMATRAALQ           | 180 |
| zRhoAc                                   | LRNDEHTRRELAKMKQEPVKPEEGRDMANRINAFGYLECSAKTKDGVREVFEMATRAALQ           | 180 |
| RhoA_antibody_immunogen (human120-150aa) | -----P E E G R D M A N R I G A F G Y M E C S A K T K D G V R E V ----- | 30  |
| zRhoAb                                   | LRNDEHTRRELTKMKQEPVKAEEGRDMANRIGAFGYMECSAKTKDGVREVFEMATRAALQ           | 180 |
|                                          | *****.****:*****:*****                                                 |     |
|                                          |                                                                        |     |
| zRhoAa                                   | AKKRGKKNACALL 193                                                      |     |
| zRhoAc                                   | ARKRGKKSGLLL 193                                                       |     |
| RhoA_antibody_immunogen (human120-150aa) | ----- 30                                                               |     |
| zRhoAb                                   | ARRGKKSNCCLL 193                                                       |     |

\* = identical residues, : = strongly similar, . = weakly similar
