# Supplementary material for: In vivo proximity labeling identifies cardiomyocyte protein networks during zebrafish heart regeneration
Source: eLife. 2021 Mar 25;10:e66079. doi: 10.7554/eLife.66079 (PMC8034980; doi:10.7554/eLife.66079)
Supplement: Supplementary file 1. — List of proteins from quantitative mass spectrometry analysis of cmlc2:birA2-GFP-CAAX ventricles. Uninjured BirA2-GFP-CAAX protein levels were normalized to uninjured BirA2-GFP levels. Data are sorted by fold change. Accession number, gene name, description of gene, total unique peptide count, and fold change with p-values are shown. [file elife-66079-supp1.xlsx]

## Sheet: cmlc2_BirA2_GFP-CAAX uninj.
Supplementary File 1: Normalized levels of BioID2 proteins from uninjured cmlc2:birA2-GFP-CAAX hearts.
Accession	Gene name	Description	TotalPeptide	CAAX Control_control_FC	CAAX Control_control_pval
Q7ZVM2	slc16a3	Monocarboxylate transporter 4b OS=Danio rerio OX=7955 GN=slc16a3 PE=2 SV=1	2	390	1.5e-05
B8A453	rab23	RAB23, member RAS oncogene family OS=Danio rerio OX=7955 GN=rab23 PE=4 SV=1	6	214	0.000286
Q5IFI2	mcamb	Gicerin OS=Danio rerio OX=7955 GN=mcamb PE=2 SV=1	31	111	1.47e-06
F1QIB3	dbnlb	Drebrin-like b OS=Danio rerio OX=7955 GN=dbnlb PE=1 SV=1	1	108	0.00228
A0A0R4ICH0	rictora	RPTOR-independent companion of MTOR, complex 2 a OS=Danio rerio OX=7955 GN=rictora PE=4 SV=2	5	103	0.00538
F1QAU9	wu:fi04e12	Wu:fi04e12 OS=Danio rerio OX=7955 GN=wu:fi04e12 PE=1 SV=2	8	94.1	0.000214
A1L1P3	zgc:158222	Adenosylhomocysteinase OS=Danio rerio OX=7955 GN=zgc:158222 PE=2 SV=1	1	72.4	0.00155
A0A0R4ICR8	bsg	Basigin OS=Danio rerio OX=7955 GN=bsg PE=1 SV=1	5	65.6	1.51e-05
E7F1B8	mcamb	Melanoma cell adhesion molecule b OS=Danio rerio OX=7955 GN=mcamb PE=1 SV=1	6	63.6	4.62e-05
A0A0G2L2U8	A0A0G2L2U8	Uncharacterized protein OS=Danio rerio OX=7955 PE=4 SV=1	15	62.7	4.2e-05
A0PJR3	ppap2d	Phosphatidic acid phosphatase type 2D OS=Danio rerio OX=7955 GN=ppap2d PE=2 SV=1	3	58.9	0.0011
A0A0R4IAD5	ndrg4	NDRG family member 4 (Fragment) OS=Danio rerio OX=7955 GN=ndrg4 PE=1 SV=1	5	50.5	3.31e-05
F1QYD7	jam3b	Junctional adhesion molecule 3b (Fragment) OS=Danio rerio OX=7955 GN=jam3b PE=1 SV=1	8	50.1	4.66e-06
A0A0G2L2K5	scarb2b	Uncharacterized protein OS=Danio rerio OX=7955 GN=scarb2b PE=1 SV=1	15	49.7	1.36e-05
Q9DGM6	sptb	Spectrin beta chain OS=Danio rerio OX=7955 GN=sptb PE=2 SV=1	2	49.5	0.00154
F1QMH7	dag1	Dystroglycan 1 OS=Danio rerio OX=7955 GN=dag1 PE=1 SV=1	3	43.1	0.0012
F1Q7T3	slc16a3	Solute carrier family 16 (monocarboxylate transporter), member 3 OS=Danio rerio OX=7955 GN=slc16a3 PE=4 SV=1	28	40.2	0.00115
F1R2C3	jph1a	Junctophilin 1a OS=Danio rerio OX=7955 GN=jph1a PE=4 SV=1	22	39.1	6.14e-07
F1RBU6	aifm1	Apoptosis-inducing factor, mitochondrion-associated 1 OS=Danio rerio OX=7955 GN=aifm1 PE=1 SV=1	3	38.9	0.00302
E7F033	sc:d217	Sc:d217 OS=Danio rerio OX=7955 GN=sc:d217 PE=4 SV=2	2	35.5	0.000302
Q6DC92	ralba	V-ral simian leukemia viral oncogene homolog Ba (ras-related) OS=Danio rerio OX=7955 GN=ralba PE=1 SV=1	16	34.6	0.000453
A0A0G2KJ47	snta1	Syntrophin alpha 1 OS=Danio rerio OX=7955 PE=1 SV=2	17	33	1.27e-05
A6XCT1	ndrg4	NDRG family member 4 OS=Danio rerio OX=7955 GN=ndrg4 PE=1 SV=1	8	32.9	0.00049
A0A1L1QZM7	scrib	Protein scribble homolog OS=Danio rerio OX=7955 GN=scrib PE=1 SV=1	1	32.6	0.0121
Q58EM0	hhla2a.1	HERV-H LTR-associating 2a, tandem duplicate 1 OS=Danio rerio OX=7955 GN=hhla2a.1 PE=1 SV=1	13	32.4	7.9e-06
F1QU24	adam9	ADAM metallopeptidase domain 9 OS=Danio rerio OX=7955 GN=adam9 PE=4 SV=1	1	32.3	0.000413
F8W315	palld	Palladin, cytoskeletal-associated protein OS=Danio rerio OX=7955 GN=palld PE=1 SV=3	20	31.6	0.000381
H0WES8	atp5md	Si:dkeyp-80c12.10 OS=Danio rerio OX=7955 GN=si:dkeyp-80c12.10 PE=1 SV=1	1	31.5	0.00845
F1R5S1	erbb2	Receptor protein-tyrosine kinase OS=Danio rerio OX=7955 GN=erbb2 PE=3 SV=1	1	31.5	0.0191
A4JYP3	sc:d217	cDNA, clone cssl:d0217 OS=Danio rerio OX=7955 GN=sc:d217 PE=2 SV=1	2	30.5	0.000251
A7MBX2	gprc5c	Gprc5c protein OS=Danio rerio OX=7955 GN=gprc5c PE=2 SV=1	7	30.1	0.000233
G1K2E7	cdh2	Cadherin-2 OS=Danio rerio OX=7955 GN=cdh2 PE=1 SV=1	20	28.4	4.97e-05
Q4VBH5	gna13a	Gna13a protein OS=Danio rerio OX=7955 GN=gna13a PE=2 SV=1	3	27	0.00294
F1QY46	spega	SPEG complex locus a OS=Danio rerio OX=7955 GN=spega PE=4 SV=1	7	26.7	0.00026
Q3YAA0	itgb1b	Integrin beta OS=Danio rerio OX=7955 GN=itgb1b PE=2 SV=1	21	26	0.0028
Q6IQE6	ralbb	Zgc:86798 OS=Danio rerio OX=7955 GN=ralbb PE=2 SV=1	1	25.8	0.00396
R4GEZ2	si:ch211-132g1.3	Si:ch211-132g1.3 OS=Danio rerio OX=7955 GN=si:ch211-132g1.3 PE=1 SV=1	2	25.5	0.00101
F1R3T1	si:dkeyp-77h1.4	Si:dkeyp-77h1.4 OS=Danio rerio OX=7955 GN=si:dkeyp-77h1.4 PE=1 SV=2	15	22.9	5.87e-05
B7ZV11	lrrc10	Leucine rich repeat containing 10 OS=Danio rerio OX=7955 GN=lrrc10 PE=2 SV=1	4	22.2	0.000529
A8E566	rrad	Ras-related associated with diabetes OS=Danio rerio OX=7955 GN=rrad PE=2 SV=1	5	21.6	0.00111
Q803D1	arf1	ADP-ribosylation factor 1 OS=Danio rerio OX=7955 GN=arf1 PE=1 SV=1	2	21.1	0.000257
A1A5X4	add1	adducin 1 (Alpha) OS=Danio rerio OX=7955 GN=add1 PE=1 SV=1	1	21.1	0.0041
Q6P3J2	arhgdia	Rho GDP dissociation inhibitor (GDI) alpha OS=Danio rerio OX=7955 GN=arhgdia PE=1 SV=1	5	20.9	0.0275
Q6P5K6	slc25a20	Solute carrier family 25 (Carnitine/acylcarnitine translocase), member 20 OS=Danio rerio OX=7955 GN=slc25a20 PE=1 SV=1	1	20.1	0.00116
Q4VBV1	uqcrb	Cytochrome b-c1 complex subunit 7 OS=Danio rerio OX=7955 GN=uqcrb PE=1 SV=1	5	19.8	0.00181
F1QHJ8	ryr1a	Ryanodine receptor 1a (skeletal) OS=Danio rerio OX=7955 GN=ryr1a PE=1 SV=2	3	19.3	4.79e-05
E7F7T3	E7F7T3	Uncharacterized protein OS=Danio rerio OX=7955 PE=4 SV=2	2	18.9	0.00178
Q502Q3	efnb3b	Efnb3 OS=Danio rerio OX=7955 GN=efnb3b PE=1 SV=1	5	18.2	9.37e-06
Q58EB8	im:7148382	LOC560949 protein (Fragment) OS=Danio rerio OX=7955 GN=im:7148382 PE=2 SV=1	4	18.1	0.000659
A4QNV2	jph2	Jph2 protein OS=Danio rerio OX=7955 GN=jph2 PE=2 SV=1	12	17.7	0.000183
E7FDX8	slc12a7b	Solute carrier family 12 (potassium/chloride transporter), member 7b OS=Danio rerio OX=7955 GN=slc12a7b PE=4 SV=2	47	17.3	0.000291
B2CZC1	atp2b4	Calcium-transporting ATPase OS=Danio rerio OX=7955 GN=atp2b4 PE=2 SV=1	6	17.2	3.5e-05
E7F3M2	cnnm3	Uncharacterized protein OS=Danio rerio OX=7955 GN=cnnm3 PE=4 SV=1	6	16.8	0.0048
A0A0R4IKF0	apoa1b	Apolipoprotein A-Ib OS=Danio rerio OX=7955 GN=apoa1b PE=1 SV=1	11	16.8	0.00691
Q9DDU5	gstp1	Glutathione S-transferase pi OS=Danio rerio OX=7955 GN=gstp1 PE=1 SV=1	1	16.4	0.00377
A0A0R4IJ91	slmapa	Sarcolemma-associated protein a OS=Danio rerio OX=7955 GN=slmapa PE=1 SV=1	21	16.3	0.000259
F1QCX9	F1QCX9	Uncharacterized protein OS=Danio rerio OX=7955 PE=4 SV=2	1	16.3	0.00113
A0A0R4IKQ6	cd248a	CD248 molecule, endosialin a OS=Danio rerio OX=7955 GN=cd248a PE=4 SV=1	4	16.1	0.00111
Q8HWF3	mhc1ufa	Major histocompatibility complex class I UFA gene OS=Danio rerio OX=7955 GN=mhc1ufa PE=2 SV=1	8	15.7	0.000319
Q5TZD5	rhoj	Ras homolog family member J OS=Danio rerio OX=7955 GN=rhoj PE=4 SV=1	2	15.5	5.34e-05
Q9DD89	ctsd	Cathepsin D enzyme OS=Danio rerio OX=7955 GN=ctsd PE=2 SV=1	1	15.4	0.0105
F1QL61	si:ch211-229i14.2	Si:ch211-229i14.2 (Fragment) OS=Danio rerio OX=7955 GN=si:ch211-229i14.2 PE=4 SV=1	2	15.2	0.00238
B0F0D0	cacnb4a	Calcium channel, voltage-dependent, beta 4a subunit OS=Danio rerio OX=7955 GN=cacnb4a PE=2 SV=1	10	14.8	0.00161
Q4V8U8	rab27a	RAB27A, member RAS oncogene family OS=Danio rerio OX=7955 GN=rab27a PE=1 SV=1	1	14.8	0.023
F1RBA4	dspa	Desmoplakin a OS=Danio rerio OX=7955 GN=dspa PE=1 SV=2	5	14.7	0.0106
F1Q7S5	gab1	GRB2-associated-binding protein 1 OS=Danio rerio OX=7955 GN=gab1 PE=4 SV=1	3	14.6	2.38e-05
Q6P3J7	ehd2b	EH-domain containing 2 OS=Danio rerio OX=7955 GN=ehd2b PE=1 SV=1	6	14.6	8.79e-05
F6NYT7	gpx1a	Glutathione peroxidase OS=Danio rerio OX=7955 GN=gpx1a PE=1 SV=1	5	14.6	0.000204
A0A0R4IBS6	sgcd	Sarcoglycan, delta (dystrophin-associated glycoprotein) OS=Danio rerio OX=7955 GN=sgcd PE=4 SV=1	4	14.5	0.00309
Q5TZF1	cacna1c	Voltage-dependent L-type calcium channel subunit alpha OS=Danio rerio OX=7955 GN=cacna1c PE=3 SV=1	20	14.3	0.000353
A0A0G2KHA1	vclb	Vinculin b OS=Danio rerio OX=7955 GN=vclb PE=1 SV=1	1	14.3	0.0104
F1RBH3	chchd6b	MICOS complex subunit OS=Danio rerio OX=7955 GN=chchd6b PE=1 SV=1	8	14.1	2.65e-05
Q90Z38	ranbp1	Ran-binding protein 1 OS=Danio rerio OX=7955 GN=ranbp1 PE=1 SV=1	2	13.8	0.00427
Q05AK9	tma7	Translation machinery-associated protein 7 OS=Danio rerio OX=7955 GN=tma7 PE=3 SV=1	1	13.7	0.0186
X1WGC5	peak1	Pseudopodium-enriched atypical kinase 1 OS=Danio rerio OX=7955 GN=peak1 PE=4 SV=1	8	13.5	0.000381
Q6NYK3	spred2	Sprouty-related, EVH1 domain-containing protein 2 OS=Danio rerio OX=7955 GN=spred2 PE=2 SV=1	2	13.5	0.00173
B3DHD1	tfr1a	Transferrin receptor 1a OS=Danio rerio OX=7955 GN=tfr1a PE=2 SV=1	7	13.3	0.000401
F6NYL9	hcn4	Hyperpolarization-activated cyclic nucleotide-gated potassium channel 4 (Fragment) OS=Danio rerio OX=7955 GN=hcn4 PE=4 SV=1	20	13.2	3.98e-05
E7F4N6	ano5a	Anoctamin OS=Danio rerio OX=7955 GN=ano5a PE=3 SV=1	20	13.1	0.000574
B0S6Z2	rasal2	RAS protein activator-like 2 OS=Danio rerio OX=7955 GN=rasal2 PE=1 SV=1	15	13	0.000103
Q6TH07	flot1b	Flotillin 1 OS=Danio rerio OX=7955 GN=flot1b PE=1 SV=1	7	12.8	0.000251
A0A0G2KZU0	ptgfrn	Uncharacterized protein OS=Danio rerio OX=7955 GN=ptgfrn PE=1 SV=1	15	12.8	0.00224
A0A0R4INF9	stxbp3	Syntaxin-binding protein 3 OS=Danio rerio OX=7955 GN=stxbp3 PE=1 SV=1	15	12.5	0.000361
Q6DGU9	gstk1	Glutathione S-transferase kappa OS=Danio rerio OX=7955 GN=gstk1 PE=1 SV=1	4	12.5	0.00129
Q568M0	rras2	RAS-related 2 OS=Danio rerio OX=7955 GN=rras2 PE=1 SV=1	18	12.4	8.67e-05
A8WHR4	shda	Src homology 2 domain-containing-transforming protein D, a OS=Danio rerio OX=7955 GN=shda PE=4 SV=1	3	12.3	0.000291
A0A0R4IT10	add1	Adducin 1 (alpha) (Fragment) OS=Danio rerio OX=7955 GN=add1 PE=1 SV=1	1	12.1	0.00666
Q66HW2	ehd1b	EH-domain containing 1 OS=Danio rerio OX=7955 GN=ehd1b PE=1 SV=1	30	11.9	2.14e-05
A0A0G2L6L8	sb:eu779	EPH receptor B3 OS=Danio rerio OX=7955 PE=1 SV=1	3	11.9	0.00264
F1Q9R9	hcn2b	Hyperpolarization-activated cyclic nucleotide-gated potassium channel 2b (Fragment) OS=Danio rerio OX=7955 GN=hcn2b PE=4 SV=1	10	11.8	3.01e-05
F1QNZ8	ano6	Anoctamin OS=Danio rerio OX=7955 GN=ano6 PE=3 SV=1	4	11.7	0.022
B0CLW6	pvrl2l	Poliovirus receptor-related 2-like OS=Danio rerio OX=7955 GN=pvrl2l PE=1 SV=1	8	11.6	0.000464
F1R0Q1	slc2a1b	Solute carrier family 2 (facilitated glucose transporter), member 1b OS=Danio rerio OX=7955 GN=slc2a1b PE=3 SV=2	3	11.6	0.00452
A0A0R4IKT8	ryr2b	Ryanodine receptor 2b (cardiac) OS=Danio rerio OX=7955 GN=ryr2b PE=4 SV=1	282	11.5	0.000178
F8W5H2	popdc2	Popeye domain-containing 2 OS=Danio rerio OX=7955 GN=popdc2 PE=1 SV=1	25	11.4	2.94e-05
A0A0R4IW64	rsu1	Ras suppressor protein 1 OS=Danio rerio OX=7955 GN=rsu1 PE=1 SV=1	8	11.1	0.000469
Q09SN9	parvb	Affixin OS=Danio rerio OX=7955 GN=parvb PE=2 SV=1	17	11.1	0.00173
E7F583	slc4a7	Anion exchange protein (Fragment) OS=Danio rerio OX=7955 GN=slc4a7 PE=1 SV=2	8	11	5.55e-05
Q7ZVX2	atp1b1a	Sodium/potassium-transporting ATPase subunit beta OS=Danio rerio OX=7955 GN=atp1b1a PE=2 SV=1	8	10.9	0.000216
Q5TZE8	napepld	N-acyl phosphatidylethanolamine phospholipase D OS=Danio rerio OX=7955 GN=napepld PE=1 SV=2	3	10.9	0.00293
A4FUP1	hal	Histidine ammonia-lyase OS=Danio rerio OX=7955 GN=hal PE=1 SV=1	1	10.9	0.0332
Q1LU92	ctnnal1	Catenin (cadherin-associated protein), alpha-like 1 OS=Danio rerio OX=7955 GN=ctnnal1 PE=1 SV=2	5	10.8	3.87e-05
A4QNU3	cldn11b	Claudin OS=Danio rerio OX=7955 GN=cldn11b PE=1 SV=1	2	10.8	7.46e-05
Q29RC5	rac1b	Rac family small GTPase 1b OS=Danio rerio OX=7955 GN=rac1b PE=2 SV=1	2	10.8	0.0093
Q5PQZ7	bves	Blood vessel epicardial substance OS=Danio rerio OX=7955 GN=bves PE=1 SV=1; Duplicate proteins: G9HVJ5|G9HVJ5_DANRE	20	10.6	8.82e-05
Q502H0	snap29	Im:7145101 protein (Fragment) OS=Danio rerio OX=7955 GN=snap29 PE=2 SV=1	3	10.5	5.98e-05
A0A0G2KUX6	A0A0G2KUX6	Uncharacterized protein OS=Danio rerio OX=7955 PE=4 SV=1	2	10.4	0.014
F1QAM8	vim	Vimentin OS=Danio rerio OX=7955 GN=vim PE=1 SV=1	2	10.1	0.00342
A0A140LGY9	kcnj14	Potassium inwardly-rectifying channel, subfamily J, member 14 OS=Danio rerio OX=7955 GN=kcnj14 PE=3 SV=1	4	9.96	0.000621
A0A2C9F1K3	scn4ab	Sodium channel protein OS=Danio rerio OX=7955 GN=scn4ab PE=3 SV=1	6	9.95	0.000251
F6PC65	slc8a1a	Solute carrier family 8 (sodium/calcium exchanger), member 1a OS=Danio rerio OX=7955 GN=slc8a1a PE=1 SV=1	50	9.91	3.98e-05
E9QCG6	col1a2	Collagen, type I, alpha 2 OS=Danio rerio OX=7955 GN=col1a2 PE=1 SV=1	3	9.88	0.00418
F1QY51	sdk2b	Sidekick cell adhesion molecule 2b OS=Danio rerio OX=7955 GN=sdk2b PE=4 SV=2	57	9.87	0.000156
E7FBX4	mark2a	Non-specific serine/threonine protein kinase OS=Danio rerio OX=7955 GN=mark2a PE=1 SV=1	6	9.77	0.000725
H1ZXA6	ryr2b	Ryanodine receptor 2b protein (Fragment) OS=Danio rerio OX=7955 GN=ryr2b PE=2 SV=1	17	9.75	0.000105
E7FAI0	LOC100334619	Uncharacterized protein OS=Danio rerio OX=7955 GN=LOC100334619 PE=4 SV=2	1	9.69	0.00755
Q9DGL6	atp1a1a.1	Sodium/potassium-transporting ATPase subunit alpha OS=Danio rerio OX=7955 GN=atp1a1a.1 PE=1 SV=1	54	9.67	7.33e-06
F1QEJ5	uqcrq	Ubiquinol-cytochrome c reductase, complex III subunit VII OS=Danio rerio OX=7955 GN=uqcrq PE=1 SV=1	4	9.56	0.000281
Q4G5W2	rtn4a	Reticulon OS=Danio rerio OX=7955 GN=rtn4a PE=1 SV=1	2	9.47	0.00846
Q4V966	sept7a	Sept7a protein OS=Danio rerio OX=7955 GN=sept7a PE=2 SV=1	3	9.36	0.000179
E7F1G8	ddx61	DEAD (Asp-Glu-Ala-Asp) box helicase 61 OS=Danio rerio OX=7955 GN=ddx61 PE=1 SV=1	2	9.33	0.0303
B0V0Y4	palm1b	Paralemmin 1b OS=Danio rerio OX=7955 GN=palm1b PE=4 SV=1	29	9.17	0.00142
A0A0R4INE1	rhbdf1a	Inactive rhomboid protein OS=Danio rerio OX=7955 GN=rhbdf1a PE=3 SV=1	2	9.16	0.00109
A0A0R4IAJ9	add1	Adducin 1 (alpha) OS=Danio rerio OX=7955 GN=add1 PE=1 SV=1	33	9.14	1.72e-05
F1QZ37	ehd4	EH-domain-containing 4 (Fragment) OS=Danio rerio OX=7955 GN=ehd4 PE=1 SV=2	32	9.14	4.9e-05
F1Q836	slc20a2	Phosphate transporter OS=Danio rerio OX=7955 GN=slc20a2 PE=3 SV=2	5	9.14	0.00385
F1QIE6	kcnj19a	Si:dkey-106c17.3 OS=Danio rerio OX=7955 GN=kcnj19a PE=3 SV=1	1	9.11	0.0309
Q92051	cahz	Carbonic anhydrase OS=Danio rerio OX=7955 GN=cahz PE=1 SV=2	5	9	0.00449
Q5BJC7	hbaa2	Si:xx-by187g17.5 OS=Danio rerio OX=7955 GN=hbaa2 PE=2 SV=1	3	8.99	0.00562
P0C8S0	P0C8S0	Small membrane A-kinase anchor protein OS=Danio rerio OX=7955 PE=3 SV=1	2	8.88	0.0213
B3DKL2	jag2b	Delta-like protein OS=Danio rerio OX=7955 GN=jag2b PE=2 SV=1	1	8.85	0.00346
E7F2M4	pacs2	Phosphofurin acidic cluster sorting protein 2 OS=Danio rerio OX=7955 GN=pacs2 PE=4 SV=2	12	8.83	0.00162
F8W2V6	idh3b	Isocitrate dehydrogenase [NAD] subunit, mitochondrial OS=Danio rerio OX=7955 GN=idh3b PE=1 SV=1	1	8.83	0.00308
D2CKK9	gpx4a	Glutathione peroxidase OS=Danio rerio OX=7955 GN=gpx4a PE=2 SV=1	2	8.76	0.00297
Q8JH37	vtg1	Vitellogenin 1 (Fragment) OS=Danio rerio OX=7955 GN=vtg1 PE=2 SV=1	1	8.76	0.0349
Q1MTC4	vtg2	Vitellogenin 2 OS=Danio rerio OX=7955 GN=vtg2 PE=1 SV=1	41	8.74	0.0029
B0R0K2	kcnq1.1	Potassium voltage-gated channel, KQT-like subfamily, member 1 OS=Danio rerio OX=7955 GN=kcnq1 PE=3 SV=1	3	8.52	0.00444
E7FGK0	osbpl5	Oxysterol-binding protein OS=Danio rerio OX=7955 GN=osbpl5 PE=3 SV=1	12	8.51	7.92e-05
F1Q7Q9	fam131c	Family with sequence similarity 131, member C OS=Danio rerio OX=7955 GN=fam131c PE=4 SV=1	3	8.48	0.00205
A0A0R4ICE3	insrb	Tyrosine-protein kinase receptor OS=Danio rerio OX=7955 GN=insrb PE=1 SV=1	3	8.41	0.00238
E9QFY9	lgals9l1	Galectin OS=Danio rerio OX=7955 GN=lgals9l1 PE=1 SV=1	2	8.13	0.000842
A0A0R4ILN7	flot2a	Flotillin-2a OS=Danio rerio OX=7955 GN=flot2a PE=1 SV=1	1	8.1	0.03
Q6GMJ4	hdac11	Zgc:91942 OS=Danio rerio OX=7955 GN=hdac11 PE=2 SV=1	5	8.07	0.0176
U3JA71	cacna1g	Voltage-dependent T-type calcium channel subunit alpha (Fragment) OS=Danio rerio OX=7955 GN=cacna1g PE=3 SV=1	10	7.93	0.000507
E7FAK6	pcdh2g5	Protocadherin 2 gamma 5 OS=Danio rerio OX=7955 GN=pcdh2g5 PE=4 SV=1	12	7.91	9.36e-05
Q1LV73	slco3a1	Solute carrier organic anion transporter family member OS=Danio rerio OX=7955 GN=slco3a1 PE=3 SV=1	3	7.91	0.0192
A0A0R4IQ97	pa2g4a	Proliferation-associated 2G4, a OS=Danio rerio OX=7955 GN=pa2g4a PE=1 SV=1	2	7.91	0.0194
Q7ZUV5	rab1ba	ZRAB1B, member RAS oncogene family a OS=Danio rerio OX=7955 GN=rab1ba PE=1 SV=1	1	7.9	0.00535
A0A0R4I9P4	pak1	Non-specific serine/threonine protein kinase OS=Danio rerio OX=7955 GN=pak1 PE=1 SV=1	4	7.87	0.0019
Q7ZVT2	pkma	Pyruvate kinase OS=Danio rerio OX=7955 GN=pkma PE=1 SV=1	1	7.82	0.000643
F1QHC0	bnip2	BCL2-interacting protein 2 OS=Danio rerio OX=7955 GN=bnip2 PE=1 SV=2	3	7.81	0.00838
F8W3V3	arvcfb	ARVCF, delta catenin family member b (Fragment) OS=Danio rerio OX=7955 GN=arvcfb PE=1 SV=1	1	7.73	0.00146
E7F6Y9	daam1a	Dishevelled-associated activator of morphogenesis 1a (Fragment) OS=Danio rerio OX=7955 GN=daam1a PE=4 SV=2	6	7.71	2.81e-05
E7F8B7	plekha7b	Pleckstrin homology domain-containing, family A member 7b OS=Danio rerio OX=7955 GN=plekha7b PE=4 SV=2	60	7.7	0.00812
A2CET4	ppfibp2b	PTPRF-interacting protein,-binding protein 2b (liprin beta 2) (Fragment) OS=Danio rerio OX=7955 GN=ppfibp2b PE=4 SV=1	1	7.62	0.000164
Q1LYG2	braf	B-Raf proto-oncogene, serine/threonine kinase OS=Danio rerio OX=7955 GN=braf PE=1 SV=1	2	7.62	0.000294
F1QCE3	prdx5	Peroxiredoxin 5 OS=Danio rerio OX=7955 GN=prdx5 PE=1 SV=1	3	7.62	0.0181
E7F147	ponzr1	Plac8 onzin-related protein 1 OS=Danio rerio OX=7955 GN=ponzr1 PE=1 SV=1	1	7.6	0.0221
F1RCH4	notch2	Notch 2 OS=Danio rerio OX=7955 GN=notch2 PE=4 SV=1	2	7.47	0.0266
E7FE33	farp2	FERM, RhoGEF and pleckstrin domain protein 2 OS=Danio rerio OX=7955 GN=farp2 PE=4 SV=1	11	7.45	0.0118
A2BIB9	ank2b	Ankyrin 2b, neuronal OS=Danio rerio OX=7955 GN=ank2b PE=4 SV=1	6	7.4	0.0146
Q58EE0	mtmr1b	Mtmr1b protein OS=Danio rerio OX=7955 GN=mtmr1b PE=2 SV=1	5	7.39	0.000287
A3KMS9	prkacaa	Protein kinase, cAMP-dependent, catalytic, alpha, genome duplicate a OS=Danio rerio OX=7955 GN=prkacaa PE=1 SV=1	2	7.36	0.0148
Q90Y50	cxadr	Coxsackievirus and adenovirus receptor homolog OS=Danio rerio OX=7955 GN=cxadr PE=2 SV=1; Duplicate proteins: B7ZUW2|B7ZUW2_DANRE	9	7.27	0.0031
F1REW4	atp10d	Phospholipid-transporting ATPase OS=Danio rerio OX=7955 GN=atp10d PE=3 SV=1	6	7.24	0.00248
E7FDL7	sntb2	Syntrophin, beta 2 OS=Danio rerio OX=7955 GN=sntb2 PE=4 SV=1	4	7.12	0.0023
Q9PVK5	ldha	L-lactate dehydrogenase A chain OS=Danio rerio OX=7955 GN=ldha PE=2 SV=3	5	7.1	0.00112
Q9PVK4	ldhba	L-lactate dehydrogenase B-A chain OS=Danio rerio OX=7955 GN=ldhba PE=2 SV=4	16	7.1	0.00206
U3JA30	ablim2	Actin-binding LIM protein family, member 2 OS=Danio rerio OX=7955 GN=ablim2 PE=4 SV=1	13	7.09	0.000747
F1Q9F0	epb41l5	Erythrocyte membrane protein band 4.1-like 5 OS=Danio rerio OX=7955 GN=epb41l5 PE=1 SV=1	12	7.07	0.000416
E7FD00	usp43b	Ubiquitin-specific peptidase 43b OS=Danio rerio OX=7955 GN=usp43b PE=3 SV=1	7	7.04	0.00136
Q6TNT8	gnai2a	Guanine nucleotide binding protein (G protein), alpha inhibiting activity polypeptide 2 OS=Danio rerio OX=7955 GN=gnai2a PE=1 SV=1	1	6.87	0.0276
B3DKQ1	slc4a1a	Anion exchange protein OS=Danio rerio OX=7955 GN=slc4a1a PE=2 SV=1	12	6.85	8e-05
A0A0R4IAS5	abcc9	ATP-binding cassette, sub-family C (CFTR/MRP), member 9 OS=Danio rerio OX=7955 GN=abcc9 PE=4 SV=1	6	6.8	1.05e-05
Q803B0	hspd1	Heat shock 60 protein 1 OS=Danio rerio OX=7955 GN=hspd1 PE=1 SV=1	2	6.73	9.05e-05
F8W480	ank3a	Ankyrin 3a (Fragment) OS=Danio rerio OX=7955 GN=ank3a PE=4 SV=1	1	6.72	0.0114
Q803J2	ube2na	Ube2n protein OS=Danio rerio OX=7955 GN=ube2na PE=1 SV=1	1	6.71	0.0297
E9QIM7	palm1a	Paralemmin 1a OS=Danio rerio OX=7955 GN=palm1a PE=1 SV=1	1	6.68	0.00197
Q6DGV5	rab10	RAB10, member RAS oncogene family OS=Danio rerio OX=7955 GN=rab10 PE=1 SV=1	3	6.67	0.0296
E7F6P6	prune	Prune exopolyphosphatase OS=Danio rerio OX=7955 GN=prune PE=1 SV=1	2	6.54	0.00132
A0A0R4IRD7	cpne1	Copine I OS=Danio rerio OX=7955 GN=cpne1 PE=1 SV=1	2	6.54	0.00476
A0A0R4IF18	arvcfb	ARVCF, delta catenin family member b OS=Danio rerio OX=7955 GN=arvcfb PE=1 SV=1	63	6.41	0.000159
B3DIP9	itgb3b	Integrin beta OS=Danio rerio OX=7955 GN=itgb3b PE=2 SV=1	2	6.36	0.033
Q66I77	cox6a2	Cytochrome c oxidase subunit 6A, mitochondrial OS=Danio rerio OX=7955 GN=cox6a2 PE=1 SV=1	1	6.25	0.0172
A0A0R4I9G1	plekha1b	Pleckstrin homology domain-containing, family A (phosphoinositide-binding-specific) member 1b OS=Danio rerio OX=7955 GN=plekha1b PE=4 SV=1	3	6.22	0.000671
A0A0G2KJ38	A0A0G2KJ38	Uncharacterized protein OS=Danio rerio OX=7955 PE=1 SV=1	2	6.22	0.0105
Q7ZUZ7	arf2b	ADP-ribosylation factor 1 OS=Danio rerio OX=7955 GN=arf2b PE=1 SV=1	10	6.19	0.000175
F1Q8Z3	atp8b5a	Phospholipid-transporting ATPase (Fragment) OS=Danio rerio OX=7955 GN=atp8b5a PE=3 SV=1	1	6.17	0.0239
A0A0R4IGU0	cnn1b	Calponin OS=Danio rerio OX=7955 GN=cnn1b PE=1 SV=1	16	6.16	0.000162
Q6PC06	ahcyl2	Adenosylhomocysteinase OS=Danio rerio OX=7955 GN=ahcyl2 PE=1 SV=1	4	6.16	0.000527
F1Q9R5	steap4	STEAP family member 4 OS=Danio rerio OX=7955 GN=steap4 PE=4 SV=1	2	6.16	0.0154
B3DGY6	sptb	Spectrin beta chain OS=Danio rerio OX=7955 GN=sptb PE=2 SV=1	133	6.11	0.000213
F1R9C3	adcy6b	Adenylate cyclase OS=Danio rerio OX=7955 GN=adcy6b PE=3 SV=2	15	6.03	0.000204
X1WE68	ahctf1	AT hook-containing transcription factor 1 OS=Danio rerio OX=7955 GN=ahctf1 PE=1 SV=1	1	6	0.00761
F8W371	ank3a	Ankyrin 3a OS=Danio rerio OX=7955 GN=ank3a PE=1 SV=1	2	5.96	0.00384
I3ITQ9	si:ch211-18i17.2	Si:ch211-18i17.2 OS=Danio rerio OX=7955 GN=si:ch211-18i17.2 PE=4 SV=1	8	5.81	0.000619
F1RCP0	pi4kaa	Phosphatidylinositol 4-kinase, catalytic, alpha a OS=Danio rerio OX=7955 GN=pi4kaa PE=1 SV=1	44	5.81	0.00926
Q6IQP4	rap1aa	RAP1A, member of RAS oncogene family OS=Danio rerio OX=7955 GN=rap1aa PE=1 SV=1	1	5.81	0.0114
A8E590	eif4a1b	Eif4a1b protein OS=Danio rerio OX=7955 GN=eif4a1b PE=2 SV=1	2	5.78	0.0158
E7FF26	esyt2a	Extended synaptotagmin-like protein 2a OS=Danio rerio OX=7955 GN=esyt2a PE=1 SV=1	2	5.78	0.0362
A2CG95	acadm	Acyl-CoA dehydrogenase medium chain OS=Danio rerio OX=7955 GN=acadm PE=1 SV=1	8	5.77	0.000326
A5WVS2	pak2b	Non-specific serine/threonine protein kinase OS=Danio rerio OX=7955 GN=pak2b PE=1 SV=1	9	5.77	0.00436
A0A0R4IHT4	rock2a	Rho-associated, coiled-coil-containing protein kinase 2a OS=Danio rerio OX=7955 GN=rock2a PE=1 SV=1	12	5.72	0.000282
F1Q579	adgrl3.1	Adhesion G protein-coupled receptor L3.1 OS=Danio rerio OX=7955 GN=adgrl3.1 PE=3 SV=2	2	5.72	0.00133
Q0P3X9	zgc:153713	Zgc:153713 OS=Danio rerio OX=7955 GN=zgc:153713 PE=2 SV=1	3	5.68	0.0298
A0A140LFM7	zgc:172302	Zgc:172302 (Fragment) OS=Danio rerio OX=7955 GN=zgc:172302 PE=4 SV=1	3	5.66	0.011
F1R319	slc25a11	Solute carrier family 25 (mitochondrial carrier; oxoglutarate carrier), member 11 OS=Danio rerio OX=7955 GN=slc25a11 PE=1 SV=1	4	5.6	0.00361
F1QWX3	gpr22a	G protein-coupled receptor 22a OS=Danio rerio OX=7955 GN=gpr22a PE=4 SV=2	2	5.58	0.000455
A0A0R4IGK4	stom	Stomatin OS=Danio rerio OX=7955 GN=stom PE=1 SV=1	6	5.54	4.4e-05
E7F957	sdk1a	Sidekick cell adhesion molecule 1a OS=Danio rerio OX=7955 GN=sdk1a PE=4 SV=2	26	5.52	0.00438
A0A0G2KF42	arhgef25a	Uncharacterized protein OS=Danio rerio OX=7955 GN=arhgef25a PE=4 SV=1	1	5.49	0.000853
A0A0R4IPQ6	cxcl8b.3	Chemokine (C-X-C motif) ligand 8b, duplicate 3 (Fragment) OS=Danio rerio OX=7955 GN=cxcl8b.3 PE=4 SV=2	1	5.49	0.0251
A7E2H8	cap1	Adenylyl cyclase-associated protein OS=Danio rerio OX=7955 GN=cap1 PE=2 SV=1	2	5.46	0.0291
Q5PR98	ndrg2	Protein NDRG2 OS=Danio rerio OX=7955 GN=ndrg2 PE=2 SV=1	2	5.44	0.00256
E7F1E4	gpr156	G protein-coupled receptor 156 OS=Danio rerio OX=7955 GN=gpr156 PE=4 SV=1	2	5.44	0.00334
F1QRR8	ralgapa1	Ral GTPase-activating protein, alpha subunit 1 (catalytic) OS=Danio rerio OX=7955 GN=ralgapa1 PE=4 SV=2	2	5.4	0.00475
F1QTD4	efr3ba	EFR3 homolog Ba (S. cerevisiae) OS=Danio rerio OX=7955 GN=efr3ba PE=4 SV=2	7	5.38	0.00662
A9C3S8	si:dkey-20d21.12	Si:dkey-20d21.12 OS=Danio rerio OX=7955 GN=si:dkey-20d21.12 PE=4 SV=1	5	5.37	0.00399
B3DIT9	pdk4	Si:rp71-57j15.4 OS=Danio rerio OX=7955 GN=pdk4 PE=2 SV=1	4	5.34	0.00245
A0A286YAF6	apobb.1	Apolipoprotein Bb, tandem duplicate 1 OS=Danio rerio OX=7955 GN=apobb.1 PE=1 SV=1	51	5.27	0.000246
Q6PHD6	ilk	Integrin-linked kinase OS=Danio rerio OX=7955 GN=ilk PE=1 SV=1	6	5.17	0.00133
Q6PC12	eno1a	Enolase 1, (Alpha) OS=Danio rerio OX=7955 GN=eno1a PE=1 SV=1	1	5.15	0.0381
A0A0R4IB44	plxnb2a	Plexin b2a OS=Danio rerio OX=7955 GN=plxnb2a PE=1 SV=1	2	5.11	0.0232
Q1L9E7	sspn	Novel protein similar to vertebrate sarcospan (Kras oncogene-associated gene) (SSPN) (Fragment) OS=Danio rerio OX=7955 GN=sspn PE=4 SV=1	1	5.1	0.0458
F1R605	cacnb1	Calcium channel, voltage-dependent, beta 1 subunit OS=Danio rerio OX=7955 GN=cacnb1 PE=4 SV=1	2	5.07	0.00387
E9QD58	mink1	Misshapen-like kinase 1 OS=Danio rerio OX=7955 GN=mink1 PE=1 SV=2	4	5.04	0.00235
B0S7B8	slc4a2a	Anion exchange protein OS=Danio rerio OX=7955 GN=slc4a2a PE=3 SV=1	9	4.93	0.00121
A0A0R4IN28	ank1a	Uncharacterized protein OS=Danio rerio OX=7955 GN=si:ch211-173b16.3 PE=4 SV=1	9	4.89	0.000699
F1QZQ3	plxnb1a	Plexin b1a (Fragment) OS=Danio rerio OX=7955 GN=plxnb1a PE=1 SV=1	2	4.89	0.00611
P79735	ran	GTP-binding nuclear protein Ran OS=Danio rerio OX=7955 GN=ran PE=2 SV=1; Duplicate proteins: Q6GTE7|Q6GTE7_DANRE	6	4.86	0.00263
Q8UVJ6	vangl2	Vang-like protein 2 OS=Danio rerio OX=7955 GN=vangl2 PE=1 SV=1	2	4.84	0.00937
A4IG19	pygb	Alpha-1,4 glucan phosphorylase OS=Danio rerio OX=7955 GN=pygb PE=2 SV=1	6	4.84	0.0139
A0A0R4IDB7	cdc42bpaa	Non-specific serine/threonine protein kinase OS=Danio rerio OX=7955 GN=cdc42bpaa PE=1 SV=1	12	4.74	0.00101
E7F9C4	prkaa2	Non-specific serine/threonine protein kinase OS=Danio rerio OX=7955 GN=prkaa2 PE=4 SV=3	3	4.73	0.00888
Q1LXK8	CH211-262K23.4-001	Novel protein containing an Acyl-CoA dehydrogenase, N-terminal and C-terminal domain (Fragment) OS=Danio rerio OX=7955 GN=CH211-262K23.4-001 PE=3 SV=1	2	4.62	0.0332
F1QXK1	si:ch211-207d6.2	Si:ch211-207d6.2 OS=Danio rerio OX=7955 GN=si:ch211-207d6.2 PE=4 SV=2	10	4.61	0.00113
Q804G9	anxa2a	Annexin OS=Danio rerio OX=7955 GN=anxa2a PE=2 SV=1	43	4.6	0.000864
A0A0R4IPH0	phactr4a	Phosphatase and actin regulator 4A OS=Danio rerio OX=7955 GN=phactr4a PE=4 SV=1	10	4.6	0.0106
B8JMC1	blvrb	Biliverdin reductase B OS=Danio rerio OX=7955 GN=blvrb PE=1 SV=1	2	4.57	0.0195
A0A0R4IW25	prps1a	Phosphoribosyl pyrophosphate synthetase 1A OS=Danio rerio OX=7955 GN=prps1a PE=1 SV=1	1	4.55	0.00125
B3DJX4	kcnh6a	Potassium voltage-gated channel, subfamily H (Eag-related), member 2 OS=Danio rerio OX=7955 GN=kcnh6a PE=2 SV=1	32	4.54	0.000457
F1QI59	ppp1cb	Serine/threonine-protein phosphatase OS=Danio rerio OX=7955 GN=ppp1cb PE=1 SV=2	3	4.53	0.00306
A7MCL7	cst14a.2	Cystatin 14a, tandem duplicate 2 OS=Danio rerio OX=7955 GN=cst14a.2 PE=1 SV=1	2	4.5	0.0013
Q6PHE8	ccdc124	Coiled-coil domain-containing protein 124 OS=Danio rerio OX=7955 GN=ccdc124 PE=2 SV=1	3	4.49	0.00335
A0A0G2L1F5	sptbn1	Spectrin beta chain OS=Danio rerio OX=7955 GN=sptbn1 PE=1 SV=1	47	4.48	0.0455
E7FCE4	ror2	Receptor tyrosine kinase-like orphan receptor 2 OS=Danio rerio OX=7955 GN=ror2 PE=1 SV=1	28	4.47	0.0277
A3KMH5	hadhab	Zgc:158138 protein OS=Danio rerio OX=7955 GN=hadhab PE=2 SV=1	2	4.41	0.00426
Q4VBU0	bckdha	2-oxoisovalerate dehydrogenase subunit alpha OS=Danio rerio OX=7955 GN=bckdha PE=1 SV=1	5	4.39	0.00873
A0A286YA36	dip2ca	Disco-interacting protein 2 homolog Ca OS=Danio rerio OX=7955 GN=dip2ca PE=1 SV=1	2	4.36	0.000742
A0A0R4IV39	ctnnd1	Catenin (cadherin-associated protein), delta 1 OS=Danio rerio OX=7955 GN=ctnnd1 PE=1 SV=1	14	4.35	0.00857
A0A0R4IYU1	fh	Fumarate hydratase, mitochondrial OS=Danio rerio OX=7955 GN=fh PE=1 SV=1	3	4.34	0.0324
F1QAH5	crybg1a	Crystallin beta-gamma domain-containing 1a OS=Danio rerio OX=7955 GN=aim1a PE=1 SV=2	4	4.31	0.000366
A4IGF7	zgc:162944	Zgc:162944 protein OS=Danio rerio OX=7955 GN=zgc:162944 PE=2 SV=1	2	4.31	0.00209
E7EXI3	pkp4	Plakophilin 4 OS=Danio rerio OX=7955 GN=pkp4 PE=4 SV=1	10	4.3	0.0143
E7FC94	si:ch211-200p22.4	Si:ch211-200p22.4 OS=Danio rerio OX=7955 GN=si:ch211-200p22.4 PE=1 SV=2	2	4.28	0.00144
Q7ZVA4	s100a10b	Protein S100 OS=Danio rerio OX=7955 GN=s100a10b PE=1 SV=1	3	4.26	0.00238
F1R2S5	vtg5	Vitellogenin 5 (Fragment) OS=Danio rerio OX=7955 GN=vtg5 PE=1 SV=1	84	4.24	0.0156
F1Q7L0	vtg4	Vitellogenin 4 (Fragment) OS=Danio rerio OX=7955 GN=vtg4 PE=1 SV=1	10	4.22	0.0229
A0A0R4IBQ7	f8	Coagulation factor VIII, procoagulant component (Fragment) OS=Danio rerio OX=7955 GN=f8 PE=1 SV=2	2	4.21	0.00141
O57521	hsp90ab1	Heat shock protein HSP 90-beta OS=Danio rerio OX=7955 GN=hsp90ab1 PE=1 SV=2	2	4.2	6.67e-05
E7FCN9	cspg4	Chondroitin sulfate proteoglycan 4 OS=Danio rerio OX=7955 GN=cspg4 PE=4 SV=1	31	4.18	0.0137
F1Q6P3	col6a1	Collagen, type VI, alpha 1 OS=Danio rerio OX=7955 GN=col6a1 PE=1 SV=2	7	4.17	0.0397
F1QST2	arhgap21b	Rho GTPase-activating protein 21b OS=Danio rerio OX=7955 GN=arhgap21b PE=1 SV=1	4	4.14	0.00844
Q696W0	speg	Striated muscle preferentially expressed protein kinase OS=Danio rerio OX=7955 GN=speg PE=2 SV=1	100	4.13	4.13e-05
H9GXQ9	mical3a	Protein-methionine sulfoxide oxidase mical3a OS=Danio rerio OX=7955 GN=mical3a PE=4 SV=2	25	4.1	1.71e-05
A9C3S0	si:ch211-198n5.11	Si:ch211-198n5.11 OS=Danio rerio OX=7955 GN=si:ch211-198n5.11 PE=1 SV=1	2	4.09	0.0038
Q6PFU4	cdc42	Cell division cycle 42 OS=Danio rerio OX=7955 GN=cdc42 PE=1 SV=1	2	4.03	0.0132
A0A0R4IRH8	pak2a	Non-specific serine/threonine protein kinase OS=Danio rerio OX=7955 GN=pak2a PE=1 SV=1	1	4.03	0.0437
F5XVB3	vwf	von Willebrand factor OS=Danio rerio OX=7955 GN=vwf PE=2 SV=1	19	4	0.00451
F6NPI4	picalma	Phosphatidylinositol-binding clathrin assembly protein a OS=Danio rerio OX=7955 GN=picalma PE=1 SV=1	5	3.99	0.00369
Q6PBY0	gnb5b	Guanine nucleotide-binding protein subunit beta-5b OS=Danio rerio OX=7955 GN=gnb5b PE=2 SV=1	1	3.98	0.00245
A0A140LGL3	utrn	Utrophin OS=Danio rerio OX=7955 GN=utrn PE=1 SV=1	3	3.86	0.0154
F1QAU6	tjp2b	Tight junction protein 2b (zona occludens 2) OS=Danio rerio OX=7955 GN=tjp2b PE=1 SV=2	10	3.83	0.00377
E7F6J8	adam8b	ADAM metallopeptidase domain 8b OS=Danio rerio OX=7955 GN=adam8b PE=4 SV=1	2	3.76	0.0271
Q08BK3	dsc2l	Dsc2l protein (Fragment) OS=Danio rerio OX=7955 GN=dsc2l PE=2 SV=1	44	3.67	0.0244
E7F131	tfr1b	Transferrin receptor 1b OS=Danio rerio OX=7955 GN=tfr1b PE=1 SV=2	17	3.66	0.00142
B0BLX3	epb41l3a	Zgc:92004 protein OS=Danio rerio OX=7955 GN=epb41l3a PE=2 SV=1	8	3.65	0.0315
F1QTP9	si:ch73-55i23.1	Si:ch73-55i23.1 OS=Danio rerio OX=7955 GN=si:ch73-55i23.1 PE=1 SV=2	5	3.63	0.00491
Q6IQW8	slc12a2	Solute carrier family 12 (Potassium/chloride transporters), member 2 OS=Danio rerio OX=7955 GN=slc12a2 PE=2 SV=1	2	3.62	0.0133
E9QJJ0	tial1	TIA1 cytotoxic granule-associated RNA-binding protein-like 1 (Fragment) OS=Danio rerio OX=7955 GN=tial1 PE=1 SV=1	2	3.58	0.0439
F1QYW3	jam3a	Junctional adhesion molecule 3a OS=Danio rerio OX=7955 GN=jam3a PE=4 SV=2	3	3.57	0.0024
Q498W6	ndufa12	NADH dehydrogenase [ubiquinone] 1 alpha subcomplex subunit 12 OS=Danio rerio OX=7955 GN=ndufa12 PE=2 SV=1	1	3.56	0.0381
Q5TZ42	cdc42bpb	CDC42-binding protein kinase beta (DMPK-like) OS=Danio rerio OX=7955 GN=cdc42bpb PE=1 SV=1	37	3.54	0.0157
Q4V9I4	gars	Si:dkey-276i5.1 protein (Fragment) OS=Danio rerio OX=7955 GN=gars PE=2 SV=1	6	3.47	0.00305
Q6TEP2	aifm1	Programmed cell death 8 OS=Danio rerio OX=7955 GN=aifm1 PE=2 SV=1	16	3.46	0.0148
A0A140LG52	si:dkey-31j3.11	Si:dkey-31j3.11 OS=Danio rerio OX=7955 GN=si:dkey-31j3.11 PE=4 SV=1	1	3.45	0.0376
A5PL98	sdhb	Succinate dehydrogenase [ubiquinone] iron-sulfur subunit, mitochondrial OS=Danio rerio OX=7955 GN=sdhb PE=2 SV=1	3	3.44	0.00328
Q6DRM4	parvaa	Actopaxin OS=Danio rerio OX=7955 GN=parvaa PE=1 SV=1	6	3.41	0.0227
A0A0R4IVY5	rock1	Rho-associated protein kinase OS=Danio rerio OX=7955 GN=rock1 PE=1 SV=1	26	3.39	0.000141
E7EYJ7	erbin	Erbb2 interacting protein OS=Danio rerio OX=7955 GN=erbin PE=1 SV=2	3	3.39	0.000213
Q9DEU2	atp1a3b	Sodium/potassium-transporting ATPase subunit alpha OS=Danio rerio OX=7955 GN=atp1a3b PE=1 SV=1	4	3.38	0.00556
A5PMJ7	stx12	Syntaxin 12 OS=Danio rerio OX=7955 GN=stx12 PE=1 SV=1	5	3.38	0.0332
E7EZS3	rgs12b	Regulator of G protein-signaling 12b OS=Danio rerio OX=7955 GN=rgs12b PE=4 SV=2	1	3.32	0.00673
X1WFZ4	parvb	Parvin, beta (Fragment) OS=Danio rerio OX=7955 GN=parvb PE=4 SV=1	1	3.32	0.0205
A0A0R4INA4	pak4	Non-specific serine/threonine protein kinase OS=Danio rerio OX=7955 GN=pak4 PE=1 SV=1	1	3.32	0.0353
A7YYB3	uqcrc2b	Ubiquinol-cytochrome c reductase core protein II OS=Danio rerio OX=7955 GN=uqcrc2b PE=2 SV=1	10	3.31	0.00152
A5WWE9	flrt2	Fibronectin leucine-rich transmembrane protein 2 OS=Danio rerio OX=7955 GN=flrt2 PE=4 SV=1	3	3.3	0.0112
A0A0R4IB50	ppp1r13ba	Protein phosphatase 1, regulatory subunit 13Ba OS=Danio rerio OX=7955 GN=ppp1r13ba PE=4 SV=1	6	3.28	0.00114
Q804G3	anxa11b	Annexin OS=Danio rerio OX=7955 GN=anxa11b PE=1 SV=1	6	3.28	0.00447
E7F8T6	nampta	Nicotinamide phosphoribosyltransferase a OS=Danio rerio OX=7955 GN=nampta PE=1 SV=1	3	3.25	0.0072
A0A0R4IJ08	sptan1	Spectrin alpha 2 OS=Danio rerio OX=7955 GN=sptan1 PE=1 SV=1	104	3.19	0.005
A8KBY8	anxa6	Annexin OS=Danio rerio OX=7955 GN=anxa6 PE=2 SV=1	7	3.17	0.0148
A0A0R4IP09	plekha6	Pleckstrin homology domain-containing, family A member 6 OS=Danio rerio OX=7955 GN=plekha6 PE=1 SV=1	13	3.15	0.00259
F1Q649	tns1b	Tensin 1b OS=Danio rerio OX=7955 GN=tns1b PE=1 SV=2	30	3.14	0.000207
F1QZ50	ahnak	AHNAK nucleoprotein OS=Danio rerio OX=7955 GN=ahnak PE=1 SV=2	450	3.1	0.000905
B0R197	vdac3	Voltage-dependent anion channel 3 OS=Danio rerio OX=7955 GN=vdac3 PE=1 SV=1	1	3.09	0.00277
Q6DC80	srl	Srl protein (Fragment) OS=Danio rerio OX=7955 GN=srl PE=2 SV=1	5	3.08	0.0372
F1RCR4	ephb2a	Receptor protein-tyrosine kinase (Fragment) OS=Danio rerio OX=7955 GN=ephb2a PE=4 SV=2	7	3.06	0.0172
F1QU77	zmp:0000001167	Zmp:0000001167 OS=Danio rerio OX=7955 GN=zmp:0000001167 PE=4 SV=2	1	3.05	0.00672
E7FEY5	cdc42bpab	Non-specific serine/threonine protein kinase OS=Danio rerio OX=7955 GN=cdc42bpab PE=3 SV=1	3	3.02	0.0025
A7YT47	hadhaa	Hadha protein OS=Danio rerio OX=7955 GN=hadhaa PE=1 SV=1	5	3.01	0.00141
A5WUQ7	apobb.2	Apolipoprotein Bb, tandem duplicate 2 OS=Danio rerio OX=7955 GN=apobb.2 PE=1 SV=2	2	3.01	0.00606
E7F9N7	dync1h1	Dynein, cytoplasmic 1, heavy chain 1 OS=Danio rerio OX=7955 GN=dync1h1 PE=1 SV=1	2	3	0.00634
F1QNB1	ank3a	Ankyrin 3a OS=Danio rerio OX=7955 GN=ank3a PE=1 SV=2	86	2.98	0.00131
E7F4G7	ank2a	Ankyrin 2a, neuronal OS=Danio rerio OX=7955 GN=ank2a PE=1 SV=2	28	2.95	0.0102
F1R0J8	pdhx	Dihydrolipoamide acetyltransferase component of pyruvate dehydrogenase complex OS=Danio rerio OX=7955 GN=pdhx PE=1 SV=1	2	2.95	0.0298
F1QVW0	nppa	Natriuretic peptide A OS=Danio rerio OX=7955 GN=nppa PE=1 SV=1	3	2.95	0.0427
Q5RH26	atp5f1c	ATP synthase subunit gamma OS=Danio rerio OX=7955 GN=atp5f1c PE=1 SV=1	9	2.91	5.75e-05
A0A0R4IEQ5	lgals2a	Galectin OS=Danio rerio OX=7955 GN=lgals2a PE=1 SV=1	3	2.91	0.0139
Q7SXU7	ddx39b	DEAD (Asp-Glu-Ala-Asp) box polypeptide 39B OS=Danio rerio OX=7955 GN=ddx39b PE=1 SV=1	3	2.9	0.00729
A8WGC6	atp5f1b	ATP synthase subunit beta OS=Danio rerio OX=7955 GN=atp5f1b PE=1 SV=1	9	2.9	0.0191
F1R1C0	acsf2	Acyl-CoA synthetase family member 2, mitochondrial OS=Danio rerio OX=7955 GN=acsf2 PE=1 SV=1	4	2.89	0.0153
A2RUY1	slc43a1b	Slc43a1b protein OS=Danio rerio OX=7955 GN=slc43a1b PE=2 SV=1	3	2.87	0.00217
Q0V976	LOC561528	LOC561528 protein (Fragment) OS=Danio rerio OX=7955 GN=LOC561528 PE=2 SV=1	2	2.87	0.00321
A7MCL8	etfb	Etfb protein OS=Danio rerio OX=7955 GN=etfb PE=2 SV=1	7	2.84	0.00196
A0A0N4SUA5	ctnnb1	Catenin (cadherin-associated protein), beta 1 OS=Danio rerio OX=7955 GN=ctnnb1 PE=1 SV=1	20	2.84	0.00603
A0A0R4IHT0	slc25a12	Solute carrier family 25 (aspartate/glutamate carrier), member 12 OS=Danio rerio OX=7955 GN=slc25a12 PE=1 SV=1	25	2.83	0.00187
E7F1E3	abcb4	ATP-binding cassette, sub-family B (MDR/TAP), member 4 OS=Danio rerio OX=7955 GN=abcb4 PE=4 SV=1	9	2.83	0.00237
F1QGT2	slc4a10a	Anion exchange protein OS=Danio rerio OX=7955 GN=slc4a10a PE=1 SV=2	2	2.83	0.00293
A0A0R4II76	acat1	Acetyl-CoA acetyltransferase, mitochondrial OS=Danio rerio OX=7955 GN=acat1 PE=1 SV=1	3	2.82	0.0189
A0A0R4ITJ4	itga5	Integrin, alpha 5 (fibronectin receptor, alpha polypeptide) OS=Danio rerio OX=7955 GN=itga5 PE=1 SV=1	1	2.82	0.0261
A0A140LH04	mtus1a	Microtubule-associated tumor suppressor 1 homolog A OS=Danio rerio OX=7955 GN=mtus1a PE=4 SV=1	2	2.78	0.00659
Q5BJA1	zgc:114188	Zgc:114188 OS=Danio rerio OX=7955 GN=zgc:114188 PE=1 SV=1	2	2.78	0.0404
A0A0R4IJR5	idh3g	Isocitrate dehydrogenase [NAD] subunit, mitochondrial OS=Danio rerio OX=7955 GN=idh3g PE=1 SV=1	6	2.76	0.000412
Q5I0F6	prkar1aa	Prkar1a protein OS=Danio rerio OX=7955 GN=prkar1aa PE=1 SV=1	1	2.72	0.0143
Q9PU58	nipsnap2	Protein NipSnap homolog 2 OS=Danio rerio OX=7955 GN=nipsnap2 PE=2 SV=2	5	2.72	0.0153
Q7SX76	fgfrl1a	FGF receptor-like protein 1a OS=Danio rerio OX=7955 GN=fgfrl1a PE=1 SV=1	2	2.71	0.000896
Q2LEK1	dync1h1	Dynein cytoplasmic 1 heavy chain 1 OS=Danio rerio OX=7955 GN=dync1h1 PE=2 SV=1	28	2.64	0.0232
Q6NY31	prkab1b	Protein kinase, AMP-activated, beta 1 non-catalytic subunit, b OS=Danio rerio OX=7955 GN=prkab1b PE=1 SV=1	2	2.58	0.00944
A0A0S2I7K2	vclb	Vinculin b OS=Danio rerio OX=7955 GN=vclb PE=2 SV=1	14	2.57	0.00214
F1R665	cavin2b	Caveolae-associated protein 2b OS=Danio rerio OX=7955 GN=cavin2b PE=1 SV=1	8	2.56	0.0445
Q6PBI0	sucla2	Succinate--CoA ligase [ADP-forming] subunit beta, mitochondrial OS=Danio rerio OX=7955 GN=sucla2 PE=1 SV=1	6	2.54	0.00212
E7F0N6	apbb1	Amyloid beta (A4) precursor protein-binding, family B, member 1 (Fe65) OS=Danio rerio OX=7955 GN=apbb1 PE=4 SV=1	10	2.54	0.0076
Q6DGE9	unc45b	Protein unc-45 homolog B OS=Danio rerio OX=7955 GN=unc45b PE=1 SV=2	20	-2.53	0.0068
P02662	CSN1S1	Alpha-S1-casein OS=Bos taurus GN=CSN1S1 PE=1 SV=2	3	-2.56	0.046
Q7ZUL7	rbpms2b	RNA binding protein OS=Danio rerio OX=7955 GN=rbpms2b PE=1 SV=1	3	-2.58	0.00684
F1Q8G3	eif4bb	Eukaryotic translation initiation factor 4Bb OS=Danio rerio OX=7955 GN=eif4bb PE=1 SV=1	2	-2.65	0.0117
F1QHW9	parp4	Poly [ADP-ribose] polymerase (Fragment) OS=Danio rerio OX=7955 GN=parp4 PE=1 SV=2	2	-2.66	0.00844
Q6PHE3	plin3	Si:rp71-61h23.4 protein (Fragment) OS=Danio rerio OX=7955 GN=plin3 PE=2 SV=1	8	-2.68	0.0017
F1QGI3	rpl23a	Ribosomal protein L23a OS=Danio rerio OX=7955 GN=rpl23a PE=1 SV=1	3	-2.7	0.00288
Q4KME6	gigyf2	GRB10-interacting GYF protein 2 OS=Danio rerio OX=7955 GN=gigyf2 PE=2 SV=2	4	-2.77	0.00899
Q803Q7	aldoaa	Fructose-bisphosphate aldolase OS=Danio rerio OX=7955 GN=aldoaa PE=1 SV=1	12	-2.78	0.0248
Q0PWB8	pdlim3b	PDZ and LIM domain 3b OS=Danio rerio OX=7955 GN=pdlim3b PE=2 SV=1	10	-2.79	0.000645
A0A0R4IDE1	myot	Myotilin OS=Danio rerio OX=7955 GN=myot PE=4 SV=1	2	-2.85	0.017
A0A1L1QZN5	cttn	Cortactin OS=Danio rerio OX=7955 GN=cttn PE=1 SV=1	14	-2.86	0.00384
Q6ZM79	phactr2	Phosphatase and actin regulator (Fragment) OS=Danio rerio OX=7955 GN=phactr2 PE=3 SV=2	6	-2.9	0.0046
A0A0R4IGQ8	myom1b	Myomesin 1b OS=Danio rerio OX=7955 GN=myom1b PE=1 SV=1	38	-2.98	0.00354
Q7T370	cdv3	Protein CDV3 homolog OS=Danio rerio OX=7955 GN=cdv3 PE=2 SV=1	4	-2.98	0.0103
A5X6X6	ttn.1	Titin b OS=Danio rerio OX=7955 GN=ttn.1 PE=4 SV=1	5	-3.16	0.037
A0A0R4IQN8	naca	Nascent polypeptide-associated complex subunit alpha OS=Danio rerio OX=7955 GN=naca PE=1 SV=1	35	-3.17	0.00882
Q6Q7X9	klhl31	Kelch-like protein 31 OS=Danio rerio OX=7955 GN=klhl31 PE=2 SV=1; Duplicate proteins: A2RRU8|A2RRU8_DANRE	2	-3.23	0.0221
F1Q6K8	svila	Supervillin a OS=Danio rerio OX=7955 GN=svila PE=4 SV=1	7	-3.24	0.0279
Q6TNT6	prpf3	U4/U6-associated RNA splicing factor OS=Danio rerio OX=7955 GN=prpf3 PE=2 SV=1	1	-3.26	0.0448
A0A1D5NSS7	trip6	Thyroid hormone receptor interactor 6 OS=Danio rerio OX=7955 GN=trip6 PE=1 SV=1	1	-3.36	0.00694
B3DK40	ahr2	Aryl hydrocarbon receptor 2 OS=Danio rerio OX=7955 GN=ahr2 PE=2 SV=1	1	-3.38	0.0203
A8KBY7	bpgm	Phosphoglycerate mutase OS=Danio rerio OX=7955 GN=bpgm PE=2 SV=1	1	-3.41	0.0175
E9QI46	coro1cb	Coronin OS=Danio rerio OX=7955 GN=coro1cb PE=1 SV=1	9	-3.51	0.00356
A8DZJ0	tbcb	Tubulin folding cofactor B OS=Danio rerio OX=7955 GN=tbcb PE=1 SV=1	3	-3.55	0.0499
E9QGR6	tmod1	Tropomodulin 1 OS=Danio rerio OX=7955 GN=tmod1 PE=1 SV=1	4	-3.58	0.00111
F1QL68	huwe1	HECT, UBA and WWE domain-containing 1 (Fragment) OS=Danio rerio OX=7955 GN=huwe1 PE=1 SV=1	6	-3.62	0.00663
Q5XJ03	fdps	Fdps protein (Fragment) OS=Danio rerio OX=7955 GN=fdps PE=2 SV=1	4	-3.69	0.00391
Q5PZ43	xirp1	Xin actin-binding repeat-containing protein 1 OS=Danio rerio OX=7955 GN=xirp1 PE=1 SV=1	77	-3.7	0.00382
E7FDI9	setd3	Histone-lysine N-methyltransferase OS=Danio rerio OX=7955 GN=setd3 PE=1 SV=1	3	-3.7	0.0348
Q6P3G1	cp	Ceruloplasmin OS=Danio rerio OX=7955 GN=cp PE=1 SV=1	2	-3.73	0.0304
E7F3I8	dhx15	DEAH (Asp-Glu-Ala-His) box helicase 15 OS=Danio rerio OX=7955 GN=dhx15 PE=1 SV=1	1	-3.74	0.0157
A0A286YA82	eif4g3b	Eukaryotic translation initiation factor 4 gamma, 3b OS=Danio rerio OX=7955 GN=eif4g3b PE=1 SV=1	2	-3.79	0.0112
F1R3D9	phka2	Phosphorylase b kinase regulatory subunit OS=Danio rerio OX=7955 GN=phka2 PE=3 SV=2	1	-3.81	0.000679
Q6GMK5	smpx	Small muscle protein, X-linked OS=Danio rerio OX=7955 GN=smpx PE=2 SV=1	2	-3.81	0.0164
F1QBP1	myoz2b	Myozenin 2b OS=Danio rerio OX=7955 GN=myoz2b PE=4 SV=1	5	-3.89	5.71e-05
B7ZUY8	synm	Si:dkey-25f3.3 OS=Danio rerio OX=7955 GN=synm PE=2 SV=1	14	-3.89	0.0216
A0A0G2LAU9	gnaz	G protein subunit alpha z OS=Danio rerio OX=7955 GN=gnaz PE=1 SV=1	1	-3.96	0.0395
A0A0G2L6C1	smyhc2	Uncharacterized protein OS=Danio rerio OX=7955 PE=3 SV=1	1	-4.05	0.0221
Q66I24	ass1	Argininosuccinate synthase OS=Danio rerio OX=7955 GN=ass1 PE=2 SV=1	7	-4.09	0.00665
B8A5F6	sorbs2b	Novel protein similar to vertebrate sorbin and SH3 domain containing 2 (SORBS2) OS=Danio rerio OX=7955 GN=sorbs2b PE=4 SV=1	3	-4.17	0.000735
E7F2X0	clip1a	CAP-GLY domain-containing linker protein 1a OS=Danio rerio OX=7955 GN=clip1a PE=1 SV=2	2	-4.24	0.00186
E7FFN2	alpk3a	Alpha-kinase 3a OS=Danio rerio OX=7955 GN=alpk3a PE=4 SV=1	2	-4.31	0.0247
Q6PBK9	prdx6	Novel protein (Zgc:73360) OS=Danio rerio OX=7955 GN=prdx6 PE=2 SV=1	4	-4.36	0.042
T1ECV2	mylk3	Myosin light chain kinase 3 OS=Danio rerio OX=7955 GN=mylk3 PE=4 SV=2	38	-4.39	0.000487
F1R101	eif4g1a	Eukaryotic translation initiation factor 4 gamma, 1a OS=Danio rerio OX=7955 GN=eif4g1a PE=1 SV=2	2	-4.53	0.00344
Q6P0V6	rpl8	60S ribosomal protein L8 OS=Danio rerio OX=7955 GN=rpl8 PE=2 SV=3	1	-4.54	0.00843
B8JMJ5	si:ch1073-55a19.2	Si:ch1073-55a19.2 OS=Danio rerio OX=7955 GN=si:ch1073-55a19.2 PE=1 SV=2	3	-4.65	0.00767
E7F1F3	prob1	Proline-rich basic protein 1 OS=Danio rerio OX=7955 GN=prob1 PE=4 SV=1	1	-4.68	0.0303
F1Q8D2	nsfl1c	NSFL1 (p97) cofactor (p47) OS=Danio rerio OX=7955 GN=nsfl1c PE=1 SV=1	5	-4.69	0.00717
Q566W6	cirbpa	Cold-inducible RNA-binding protein a OS=Danio rerio OX=7955 GN=cirbpa PE=1 SV=1	3	-4.8	0.0156
Q1JPS5	ndrg4	N-myc downstream regulated gene 4 OS=Danio rerio OX=7955 GN=ndrg4 PE=2 SV=1	1	-4.8	0.0269
F1QQU8	bccip	Protein BCCIP homolog OS=Danio rerio OX=7955 GN=bccip PE=1 SV=1	1	-5.05	0.00485
A0A0R4IP30	sorbs1	Sorbin and SH3 domain-containing 1 OS=Danio rerio OX=7955 GN=sorbs1 PE=1 SV=1	49	-5.16	0.00229
Q5U3E4	sugt1	SGT1 homolog, MIS12 kinetochore complex assembly cochaperone OS=Danio rerio OX=7955 GN=sugt1 PE=1 SV=1	11	-5.2	0.00132
A0A0R4I9B3	camk2d2	Calcium/calmodulin-dependent protein kinase type II delta 2 chain OS=Danio rerio OX=7955 GN=camk2d2 PE=1 SV=1	10	-5.29	0.000181
Q7SYK7	got2a	Aspartate aminotransferase OS=Danio rerio OX=7955 GN=got2a PE=1 SV=1	3	-5.45	0.0062
A0A286Y8V3	si:dkey-164f24.2	Si:dkey-164f24.2 OS=Danio rerio OX=7955 GN=si:dkey-164f24.2 PE=1 SV=1	7	-5.45	0.0138
F8W3K6	exosc2	Exosome component 2 OS=Danio rerio OX=7955 GN=exosc2 PE=1 SV=1	1	-5.62	0.0341
F8W417	tnni1b	Troponin I type 1b (skeletal, slow) (Fragment) OS=Danio rerio OX=7955 GN=tnni1b PE=1 SV=1	4	-5.65	2.9e-05
X1WF03	birc6	Baculoviral IAP repeat-containing 6 OS=Danio rerio OX=7955 GN=birc6 PE=1 SV=1	8	-5.68	0.000973
E7F9K1	limd1a	LIM domains-containing 1a OS=Danio rerio OX=7955 GN=limd1a PE=1 SV=1	5	-5.81	0.000576
Q7T3G4	pgam2	Phosphoglycerate mutase OS=Danio rerio OX=7955 GN=pgam2 PE=1 SV=1	5	-5.82	0.00471
F1QRV6	nap1l4b	Nucleosome assembly protein 1-like 4b OS=Danio rerio OX=7955 GN=nap1l4b PE=1 SV=1	5	-5.83	0.00274
Q0PWB9	pdlim4	PDZ and LIM domain 4 OS=Danio rerio OX=7955 GN=pdlim4 PE=1 SV=1	1	-5.86	0.0206
F1QSB8	ddx42	DEAD (Asp-Glu-Ala-Asp) box helicase 42 OS=Danio rerio OX=7955 GN=ddx42 PE=1 SV=1	3	-6.2	0.000492
F1Q753	ppp6r2b	Protein phosphatase 6, regulatory subunit 2b OS=Danio rerio OX=7955 GN=ppp6r2b PE=1 SV=1	1	-6.26	0.0463
F1Q8D1	ldb3a	LIM domain-binding 3a OS=Danio rerio OX=7955 GN=ldb3a PE=1 SV=1	12	-6.53	0.00129
Q7ZVD3	ldb3a	LIM-domain binding factor 3a OS=Danio rerio OX=7955 GN=ldb3a PE=2 SV=1	3	-6.65	0.00373
Q6P2B0	vapb	VAMP (vesicle-associated membrane protein)-associated protein B and C OS=Danio rerio OX=7955 GN=vapb PE=1 SV=1	5	-6.7	0.00324
Q5RGI5	ppp6r2a	Protein phosphatase 6, regulatory subunit 2a OS=Danio rerio OX=7955 GN=ppp6r2a PE=1 SV=1	2	-6.94	0.0158
E7EXC7	usp9	Ubiquitin-specific peptidase 9 OS=Danio rerio OX=7955 GN=usp9 PE=1 SV=1	10	-7.04	0.000186
Q6NWL9	pdlim7	Pdlim7 protein OS=Danio rerio OX=7955 GN=pdlim7 PE=2 SV=1	2	-7.14	0.0127
F1R0E4	nup50	Nucleoporin 50 OS=Danio rerio OX=7955 GN=nup50 PE=1 SV=1	2	-7.22	0.00597
D1GJ56	actn3a	Actinin alpha 3a OS=Danio rerio OX=7955 GN=actn3a PE=1 SV=1	2	-7.35	0.00101
Q7ZU99	vcp	Transitional endoplasmic reticulum ATPase OS=Danio rerio OX=7955 GN=vcp PE=1 SV=1	2	-7.5	0.0168
Q802V0	ldb3b	LIM domain-binding 3b OS=Danio rerio OX=7955 GN=ldb3b PE=1 SV=1	14	-7.56	2.78e-05
F1QGC3	pdlim5b	PDZ and LIM domain 5b OS=Danio rerio OX=7955 GN=pdlim5b PE=1 SV=1	1	-7.59	0.000784
F1Q750	hcfc1a	Host cell factor C1a OS=Danio rerio OX=7955 GN=hcfc1a PE=1 SV=1	2	-7.62	0.00176
Q566R8	hspb2	Heat shock protein, alpha-crystallin-related, b2 OS=Danio rerio OX=7955 GN=hspb2 PE=1 SV=1	6	-7.72	0.00187
A8WGK7	eef1a1b	Elongation factor 1-alpha OS=Danio rerio OX=7955 GN=eef1a1b PE=2 SV=1	1	-7.77	0.0411
F1QZM7	nol11	Nucleolar protein 11-like OS=Danio rerio OX=7955 GN=nol11 PE=1 SV=1	2	-8.05	0.0193
F1QDR0	ubap2a	Ubiquitin-associated protein 2a OS=Danio rerio OX=7955 GN=ubap2a PE=4 SV=1	1	-8.1	0.022
A0A0R4IDZ5	kdm3b	Lysine (K)-specific demethylase 3B OS=Danio rerio OX=7955 GN=kdm3b PE=1 SV=1	3	-8.14	0.00645
Q6P123	cct4	T-complex protein 1 subunit delta OS=Danio rerio OX=7955 GN=cct4 PE=2 SV=1	2	-8.5	0.00907
F6P4R0	fhod3a	Formin homology 2 domain-containing 3a OS=Danio rerio OX=7955 GN=fhod3a PE=4 SV=1	26	-8.55	0.000395
F1QQZ1	sf3b1	Splicing factor 3b, subunit 1 OS=Danio rerio OX=7955 GN=sf3b1 PE=1 SV=2	13	-8.9	0.0015
Q7ZVB5	snrpd3l	Small nuclear ribonucleoprotein D3 polypeptide,-like OS=Danio rerio OX=7955 GN=snrpd3l PE=1 SV=1	1	-9.08	0.0411
F8W5V4	tnnt2a	Troponin T type 2a (cardiac) OS=Danio rerio OX=7955 GN=tnnt2a PE=1 SV=1	15	-9.14	0.00185
F1R105	smtnl	Smoothelin,-like OS=Danio rerio OX=7955 GN=smtnl PE=4 SV=1	3	-9.46	0.00845
Q7SZP2	zgc:65873	UPF0690 protein C1orf52 homolog OS=Danio rerio OX=7955 GN=zgc:65873 PE=1 SV=1	4	-9.52	0.00512
A0A0G2L7M3	A0A0G2L7M3	Uncharacterized protein OS=Danio rerio OX=7955 PE=4 SV=1	2	-9.59	0.000884
E9QHE3	rnf207b	RING finger protein 207 OS=Danio rerio OX=7955 GN=rnf207b PE=3 SV=1	4	-9.69	0.0145
F1QC03	zyx	Zyxin OS=Danio rerio OX=7955 GN=zyx PE=1 SV=1	7	-9.8	0.000302
A8WGM1	vapal	VAMP (vesicle-associated membrane protein)-associated protein A,-like OS=Danio rerio OX=7955 GN=vapal PE=1 SV=1	3	-9.92	0.0103
E7FAD0	myhz1.1	Myosin, heavy polypeptide 1.1, skeletal muscle OS=Danio rerio OX=7955 GN=myhz1.1 PE=1 SV=2	1	-10.8	0.00319
F1Q9A0	sorbs2a	Sorbin and SH3 domain-containing 2a (Fragment) OS=Danio rerio OX=7955 GN=sorbs2a PE=1 SV=1	41	-10.9	0.000817
Q7SZR4	pgam1a	Phosphoglycerate mutase OS=Danio rerio OX=7955 GN=pgam1a PE=1 SV=1	1	-10.9	0.00324
Q6NYJ5	syncripl	Synaptotagmin-binding, cytoplasmic RNA-interacting protein,-like OS=Danio rerio OX=7955 GN=syncripl PE=1 SV=1	3	-11.3	0.000383
F1Q8S5	col4a1	Collagen, type IV, alpha 1 (Fragment) OS=Danio rerio OX=7955 GN=col4a1 PE=1 SV=2	1	-11.4	0.0323
A0A0R4IYX3	ppp1r12a	Protein phosphatase 1 regulatory subunit 12A OS=Danio rerio OX=7955 GN=ppp1r12a PE=1 SV=1	12	-11.5	0.000102
A0A140LG98	sorbs1	Sorbin and SH3 domain-containing 1 (Fragment) OS=Danio rerio OX=7955 GN=sorbs1 PE=4 SV=1	1	-11.6	0.00975
Q803M8	ywhaqb	Tryosine 3-monooxygenase/tryptophan 5-monooxygenase activation protein, zeta polypeptide OS=Danio rerio OX=7955 GN=ywhaqb PE=1 SV=1	1	-11.6	0.0293
A0A1W6S8R0	myo18b	Myosin XVIIIb OS=Danio rerio OX=7955 GN=myo18b PE=2 SV=1	1	-12.1	0.032
Q498Z9	dkc1	Dyskeratosis congenita 1, dyskerin OS=Danio rerio OX=7955 GN=dkc1 PE=2 SV=1	3	-12.2	0.000585
A0A0R4IIA6	si:ch73-43g23.1	Si:ch73-43g23.1 OS=Danio rerio OX=7955 GN=si:ch73-43g23.1 PE=4 SV=1	3	-12.4	0.0462
A0A0G2KZ18	LOC100001114	Microtubule-associated protein OS=Danio rerio OX=7955 GN=LOC100001114 PE=1 SV=1	17	-13.1	8.25e-05
F1Q6F0	phkb	Phosphorylase b kinase regulatory subunit OS=Danio rerio OX=7955 GN=phkb PE=1 SV=2	5	-13.3	0.000576
F1QJT6	stau2	Double-stranded RNA-binding protein Staufen homolog 2 OS=Danio rerio OX=7955 GN=stau2 PE=4 SV=1	20	-13.9	0.00159
Q4V942	zgc:56304	Zgc:56304 protein OS=Danio rerio OX=7955 GN=zgc:56304 PE=2 SV=1	2	-14.1	0.00154
A0A0R4ITF0	stbd1	Starch-binding domain 1 OS=Danio rerio OX=7955 GN=stbd1 PE=4 SV=1	1	-14.4	0.0126
E7F4K4	kif1aa	Kinesin family member 1Aa OS=Danio rerio OX=7955 GN=kif1aa PE=3 SV=2	1	-15	0.0133
U3JAM7	synpo2lb	Synaptopodin 2-like b OS=Danio rerio OX=7955 GN=synpo2lb PE=4 SV=1	35	-17.2	0.000305
A0A0R4INC0	eml1	Echinoderm microtubule-associated protein-like 1 OS=Danio rerio OX=7955 GN=eml1 PE=4 SV=1	2	-18.1	0.00108
E7F4I8	ppip5k1b	Diphosphoinositol pentakisphosphate kinase 1b OS=Danio rerio OX=7955 GN=ppip5k1b PE=3 SV=2	2	-18.3	0.00822
F1RB02	casz1	Castor zinc finger 1 OS=Danio rerio OX=7955 GN=casz1 PE=4 SV=2	1	-19	0.0159
Q5XJ54	glrx3	Glutaredoxin 3 OS=Danio rerio OX=7955 GN=glrx3 PE=2 SV=1; Duplicate proteins: B2GNX4|B2GNX4_DANRE	1	-20.5	0.0306
E7F6M7	gpam	Glycerol-3-phosphate acyltransferase 1, mitochondrial OS=Danio rerio OX=7955 GN=gpam PE=3 SV=1	13	-21.3	5.27e-05
A8E5M6	taf9	TAF9 RNA polymerase II, TATA box binding protein (TBP)-associated factor OS=Danio rerio OX=7955 GN=taf9 PE=2 SV=1	1	-22.7	0.00761
Q6P0J0	ppp1r2	Protein phosphatase 1, regulatory (inhibitor) subunit 2 OS=Danio rerio OX=7955 GN=ppp1r2 PE=1 SV=1	1	-22.7	0.00777
Q71N41	gamt	Guanidinoacetate N-methyltransferase OS=Danio rerio OX=7955 GN=gamt PE=2 SV=2; Duplicate proteins: A8E5I0|A8E5I0_DANRE	3	-24.5	0.00283
O93409	mylpfa	Mylz2 protein OS=Danio rerio OX=7955 GN=mylpfa PE=1 SV=1	4	-24.9	0.0389
Q7ZUY0	seta	SET nuclear proto-oncogene a OS=Danio rerio OX=7955 GN=seta PE=1 SV=1	2	-25	0.00985
Q6DG11	sart1	SART1, U4/U6.U5 tri-snRNP-associated protein 1 OS=Danio rerio OX=7955 GN=sart1 PE=1 SV=1	1	-25.1	0.0222
A0A0R4IWD0	ldb3b	LIM domain-binding 3b (Fragment) OS=Danio rerio OX=7955 GN=ldb3b PE=1 SV=1	4	-25.4	0.0132
A0A0R4IET0	nt5c2a	5'-nucleotidase, cytosolic IIa OS=Danio rerio OX=7955 GN=nt5c2a PE=1 SV=1	25	-26.1	0.00201
B7ZVL5	cherp	Cherp protein OS=Danio rerio OX=7955 GN=cherp PE=2 SV=1	1	-26.4	0.000321
Q7SYM1	foxk1	Forkhead box K1 OS=Danio rerio OX=7955 GN=foxk1 PE=1 SV=1	16	-27.6	0.000182
F1QE75	tbc1d4	TBC1 domain family, member 4 (Fragment) OS=Danio rerio OX=7955 GN=tbc1d4 PE=1 SV=1	3	-30.2	4.45e-05
F1QI09	sorbs2a	Sorbin and SH3 domain-containing 2a OS=Danio rerio OX=7955 GN=sorbs2a PE=1 SV=2	5	-45	6.88e-05
A8WIP5	hcfc1b	Host cell factor C1b OS=Danio rerio OX=7955 GN=hcfc1b PE=1 SV=1	14	-45.7	2.63e-05
A0A0R4IDG4	sorbs1	Sorbin and SH3 domain-containing 1 OS=Danio rerio OX=7955 GN=sorbs1 PE=1 SV=1	1	-45.8	0.00373
A8KC20	pklr	Pyruvate kinase OS=Danio rerio OX=7955 GN=pklr PE=2 SV=1	1	-58.3	0.00817
A0A0R4IGX4	tnni4a	Troponin I4a OS=Danio rerio OX=7955 GN=tnni4a PE=1 SV=1	2	-59.1	0.000479
