# Supplementary material for: In vivo proximity labeling identifies cardiomyocyte protein networks during zebrafish heart regeneration
Source: eLife. 2021 Mar 25;10:e66079. doi: 10.7554/eLife.66079 (PMC8034980; doi:10.7554/eLife.66079)
Supplement: Supplementary file 2. — List of proteins from quantitative mass spectrometry analysis of cmlc2:birA2-GFP ventricles. Regenerating BirA2-GFP protein levels were normalized to uninjured BirA2-GFP levels. Data are sorted by fold change. Accession number, gene name, description of gene, total unique peptide count, and fold change with p-values are shown. [file elife-66079-supp2.xlsx]

## Sheet: cmlc2_BirA2-GFP 
Supplementary File 2: Normalized levels of BioID2 proteins from regenerating cmlc2:birA2-GFP hearts.
Accession	Gene name	Description	TotalPeptide	14d_control_FC	14d_control_pval
B8A453	rab23	RAB23, member RAS oncogene family OS=Danio rerio OX=7955 GN=rab23 PE=4 SV=1	6	422	0.00294
A0A0R4ICH0	rictora	RPTOR-independent companion of MTOR, complex 2 a OS=Danio rerio OX=7955 GN=rictora PE=4 SV=2	5	321	0.000443
F1QAU9	wu:fi04e12	Wu:fi04e12 OS=Danio rerio OX=7955 GN=wu:fi04e12 PE=1 SV=2	8	268	0.00111
E7F5C5	mapre1b	Microtubule-associated protein, RP/EB family, member 1b OS=Danio rerio OX=7955 GN=mapre1b PE=1 SV=2	2	200	0.00469
Q7SZV9	hbaa1	Novel alpha-globin OS=Danio rerio OX=7955 GN=hbaa1 PE=3 SV=1	1	159	0.00205
A0PJR3	ppap2d	Phosphatidic acid phosphatase type 2D OS=Danio rerio OX=7955 GN=ppap2d PE=2 SV=1	3	124	0.000479
F1QCE3	prdx5	Peroxiredoxin 5 OS=Danio rerio OX=7955 GN=prdx5 PE=1 SV=1	3	118	0.000673
A0A1L1QZM7	scrib	Protein scribble homolog OS=Danio rerio OX=7955 GN=scrib PE=1 SV=1	1	90.9	0.0144
Q0P4B4	tagln	Transgelin OS=Danio rerio OX=7955 GN=tagln PE=1 SV=1	16	63.6	0.0145
F1R5S1	erbb2	Receptor protein-tyrosine kinase OS=Danio rerio OX=7955 GN=erbb2 PE=3 SV=1	1	59.2	0.00608
Q5BJC6	nrap	NRAP protein (Fragment) OS=Danio rerio OX=7955 GN=nrap PE=2 SV=1	1	41.6	0.0121
A0A0G2KHA1	vclb	Vinculin b OS=Danio rerio OX=7955 GN=vclb PE=1 SV=1	1	33.9	0.0113
B3DHD1	tfr1a	Transferrin receptor 1a OS=Danio rerio OX=7955 GN=tfr1a PE=2 SV=1	7	33.2	0.00117
F1RBA4	dspa	Desmoplakin a OS=Danio rerio OX=7955 GN=dspa PE=1 SV=2	5	30.1	0.0317
F1RBU6	aifm1	Apoptosis-inducing factor, mitochondrion-associated 1 OS=Danio rerio OX=7955 GN=aifm1 PE=1 SV=1	3	29.7	0.000392
E7F1G8	ddx61	DEAD (Asp-Glu-Ala-Asp) box helicase 61 OS=Danio rerio OX=7955 GN=ddx61 PE=1 SV=1	2	27.4	0.0102
A1L1P3	zgc:158222	Adenosylhomocysteinase OS=Danio rerio OX=7955 GN=zgc:158222 PE=2 SV=1	1	27	0.0177
Q4VBH5	gna13a	Gna13a protein OS=Danio rerio OX=7955 GN=gna13a PE=2 SV=1	3	25.8	0.0057
Q6ZM12	hbba2	Hemoglobin, beta adult 2 OS=Danio rerio OX=7955 GN=hbba2 PE=1 SV=1	5	25.5	0.0185
Q5IFI2	mcamb	Gicerin OS=Danio rerio OX=7955 GN=mcamb PE=2 SV=1	31	24.9	0.0491
F1R6K6	si:ch211-233a24.2	Si:ch211-233a24.2 OS=Danio rerio OX=7955 GN=si:ch211-233a24.2 PE=4 SV=2	1	21.9	0.0287
Q5BJ17	tufm	Elongation factor Tu OS=Danio rerio OX=7955 GN=tufm PE=1 SV=1	18	21.8	0.00953
Q9DGM6	sptb	Spectrin beta chain OS=Danio rerio OX=7955 GN=sptb PE=2 SV=1	2	21.1	0.0112
A0A0R4IW25	prps1a	Phosphoribosyl pyrophosphate synthetase 1A OS=Danio rerio OX=7955 GN=prps1a PE=1 SV=1	1	20.6	0.0498
Q804G9	anxa2a	Annexin OS=Danio rerio OX=7955 GN=anxa2a PE=2 SV=1	43	20.5	0.00701
F1QAM8	vim	Vimentin OS=Danio rerio OX=7955 GN=vim PE=1 SV=1	2	17.2	0.00576
A0A0R4IGU0	cnn1b	Calponin OS=Danio rerio OX=7955 GN=cnn1b PE=1 SV=1	16	16.5	4.66e-07
H0WES8	atp5md	Si:dkeyp-80c12.10 OS=Danio rerio OX=7955 GN=si:dkeyp-80c12.10 PE=1 SV=1	1	16.2	0.0078
Q66HW2	ehd1b	EH-domain containing 1 OS=Danio rerio OX=7955 GN=ehd1b PE=1 SV=1	30	15.9	0.0247
Q9DD89	ctsd	Cathepsin D enzyme OS=Danio rerio OX=7955 GN=ctsd PE=2 SV=1	1	15	0.00885
Q6P0G6	myl1	Myosin, light chain 1, alkali; skeletal, fast OS=Danio rerio OX=7955 GN=myl1 PE=1 SV=1	2	14.7	0.0287
A0A0R4IHU9	glrx3	Glutaredoxin 3 OS=Danio rerio OX=7955 GN=glrx3 PE=1 SV=1	1	14.5	0.00402
A2BIB9	ank2b	Ankyrin 2b, neuronal OS=Danio rerio OX=7955 GN=ank2b PE=4 SV=1	6	14.5	0.00267
X1WC20	zgc:114046	Histone H2B (Fragment) OS=Danio rerio OX=7955 GN=zgc:114046 PE=1 SV=1	10	14	0.0103
X1WGC5	peak1	Pseudopodium-enriched atypical kinase 1 OS=Danio rerio OX=7955 GN=peak1 PE=4 SV=1	8	14	0.00189
B7ZV11	lrrc10	Leucine rich repeat containing 10 OS=Danio rerio OX=7955 GN=lrrc10 PE=2 SV=1	4	13.8	0.00277
A8KB78	rps23	Ribosomal protein S23 OS=Danio rerio OX=7955 GN=rps23 PE=1 SV=1	3	13.7	0.0197
F1QLF1	vps51	Vacuolar protein sorting-associated protein 51 homolog OS=Danio rerio OX=7955 GN=vps51 PE=1 SV=1	1	13.6	0.00296
A8WGN0	krt8	Keratin 8 OS=Danio rerio OX=7955 GN=krt8 PE=2 SV=1	2	11.6	0.0196
B0S6Z2	rasal2	RAS protein activator-like 2 OS=Danio rerio OX=7955 GN=rasal2 PE=1 SV=1	15	11.2	0.0152
Q6NYV3	h1f0	H1 histone family, member 0 OS=Danio rerio OX=7955 GN=h1f0 PE=1 SV=1	2	11	0.00193
E7F6P6	prune	Prune exopolyphosphatase OS=Danio rerio OX=7955 GN=prune PE=1 SV=1	2	11	0.000215
F1QNZ8	ano6	Anoctamin OS=Danio rerio OX=7955 GN=ano6 PE=3 SV=1	4	10.8	0.0318
E7F033	sc:d217	Sc:d217 OS=Danio rerio OX=7955 GN=sc:d217 PE=4 SV=2	2	10.7	0.00253
F1R3T1	si:dkeyp-77h1.4	Si:dkeyp-77h1.4 OS=Danio rerio OX=7955 GN=si:dkeyp-77h1.4 PE=1 SV=2	15	10.4	0.00745
Q6TLG8	rps3	Ribosomal protein S3 OS=Danio rerio OX=7955 GN=rps3 PE=1 SV=1	15	10.2	0.0299
Q6Q420	rps15a	Ribosomal protein S15a OS=Danio rerio OX=7955 GN=rps15a PE=1 SV=1	7	10.2	0.00386
A0A0G2KJ47	A0A0G2KJ47	Syntrophin alpha 1 OS=Danio rerio OX=7955 PE=1 SV=2	17	10.1	0.00144
F1R319	slc25a11	Solute carrier family 25 (mitochondrial carrier; oxoglutarate carrier), member 11 OS=Danio rerio OX=7955 GN=slc25a11 PE=1 SV=1	4	9.95	0.0142
A3KMS9	prkacaa	Protein kinase, cAMP-dependent, catalytic, alpha, genome duplicate a OS=Danio rerio OX=7955 GN=prkacaa PE=1 SV=1	2	9.58	0.0154
Q6P5K6	slc25a20	Solute carrier family 25 (Carnitine/acylcarnitine translocase), member 20 OS=Danio rerio OX=7955 GN=slc25a20 PE=1 SV=1	1	8.83	0.00935
Q4G5W2	rtn4a	Reticulon OS=Danio rerio OX=7955 GN=rtn4a PE=1 SV=1	2	8.82	0.00957
A0A0R4J7R2	myo18aa	Myosin XVIIIAa OS=Danio rerio OX=7955 GN=myo18aa PE=3 SV=1	1	8.81	0.0098
Q92051	cahz	Carbonic anhydrase OS=Danio rerio OX=7955 GN=cahz PE=1 SV=2	5	8.81	0.0084
Q4V966	sept7a	Sept7a protein OS=Danio rerio OX=7955 GN=sept7a PE=2 SV=1	3	8.71	0.0444
F1Q7S5	gab1	GRB2-associated-binding protein 1 OS=Danio rerio OX=7955 GN=gab1 PE=4 SV=1	3	8.34	0.00608
A7MCL7	cst14a.2	Cystatin 14a, tandem duplicate 2 OS=Danio rerio OX=7955 GN=cst14a.2 PE=1 SV=1	2	7.88	0.00052
Q5BJJ2	rpl3	Ribosomal protein L3 OS=Danio rerio OX=7955 GN=rpl3 PE=1 SV=1	4	7.83	0.0291
Q7ZU48	hnrnpa0l	Heterogeneous nuclear ribonucleoprotein A0,-like OS=Danio rerio OX=7955 GN=hnrnpa0l PE=1 SV=2	1	7.67	0.0118
Q6NYE1	fgb	Fibrinogen beta chain OS=Danio rerio OX=7955 GN=fgb PE=1 SV=1	16	7.65	0.0157
A0A0R4IXL8	tln1	Talin 1 OS=Danio rerio OX=7955 GN=tln1 PE=1 SV=1	43	7.56	0.0272
Q7ZUV5	rab1ba	ZRAB1B, member RAS oncogene family a OS=Danio rerio OX=7955 GN=rab1ba PE=1 SV=1	1	7.54	0.0375
E7FF26	esyt2a	Extended synaptotagmin-like protein 2a OS=Danio rerio OX=7955 GN=esyt2a PE=1 SV=1	2	7.48	0.0285
Q6DGV5	rab10	RAB10, member RAS oncogene family OS=Danio rerio OX=7955 GN=rab10 PE=1 SV=1	3	7.17	0.0342
Q3SY84	KRT71	Keratin, type II cytoskeletal 71 OS=Homo sapiens GN=KRT71 PE=1 SV=3	1	7.07	0.0264
F1REW4	atp10d	Phospholipid-transporting ATPase OS=Danio rerio OX=7955 GN=atp10d PE=3 SV=1	6	7.01	0.00124
Q5TZF1	cacna1c	Voltage-dependent L-type calcium channel subunit alpha OS=Danio rerio OX=7955 GN=cacna1c PE=3 SV=1	20	6.87	0.032
A0A0R4INF9	stxbp3	Syntaxin-binding protein 3 OS=Danio rerio OX=7955 GN=stxbp3 PE=1 SV=1	15	6.77	0.0168
Q1LV73	slco3a1	Solute carrier organic anion transporter family member OS=Danio rerio OX=7955 GN=slco3a1 PE=3 SV=1	3	6.71	0.0258
E9QJJ0	tial1	TIA1 cytotoxic granule-associated RNA-binding protein-like 1 (Fragment) OS=Danio rerio OX=7955 GN=tial1 PE=1 SV=1	2	6.67	0.00857
Q8HWF3	mhc1ufa	Major histocompatibility complex class I UFA gene OS=Danio rerio OX=7955 GN=mhc1ufa PE=2 SV=1	8	6.61	0.026
F1QU77	zmp:0000001167	Zmp:0000001167 OS=Danio rerio OX=7955 GN=zmp:0000001167 PE=4 SV=2	1	6.57	0.0235
Q7ZVG7	fgg	Fgg protein OS=Danio rerio OX=7955 GN=fgg PE=1 SV=1	18	6.42	0.0176
Q9PVK5	ldha	L-lactate dehydrogenase A chain OS=Danio rerio OX=7955 GN=ldha PE=2 SV=3	5	6.23	0.00673
A4IG19	pygb	Alpha-1,4 glucan phosphorylase OS=Danio rerio OX=7955 GN=pygb PE=2 SV=1	6	6	0.0293
A7E2H8	cap1	Adenylyl cyclase-associated protein OS=Danio rerio OX=7955 GN=cap1 PE=2 SV=1	2	5.93	0.00147
F1QVP9	esyt1b	Extended synaptotagmin-like protein 1b OS=Danio rerio OX=7955 GN=esyt1b PE=1 SV=2	56	5.89	0.0371
Q5TYP7	ehd3	EH-domain-containing 3 OS=Danio rerio OX=7955 GN=ehd3 PE=1 SV=1	1	5.8	0.0381
F1RCR4	ephb2a	Receptor protein-tyrosine kinase (Fragment) OS=Danio rerio OX=7955 GN=ephb2a PE=4 SV=2	7	5.73	0.000397
A2CG95	acadm	Acyl-CoA dehydrogenase medium chain OS=Danio rerio OX=7955 GN=acadm PE=1 SV=1	8	5.71	0.0041
E7F583	slc4a7	Anion exchange protein (Fragment) OS=Danio rerio OX=7955 GN=slc4a7 PE=1 SV=2	8	5.41	0.02
B2CZC1	atp2b4	Calcium-transporting ATPase OS=Danio rerio OX=7955 GN=atp2b4 PE=2 SV=1	6	5.35	0.0161
A0A140LG26	slc29a1b	Solute carrier family 29 (equilibrative nucleoside transporter), member 1b OS=Danio rerio OX=7955 GN=slc29a1b PE=1 SV=1	2	5.28	0.0405
Q7ZU85	lpp	LIM domain containing preferred translocation partner in lipoma OS=Danio rerio OX=7955 GN=lpp PE=2 SV=1	5	5.26	0.000617
A0A0R4IRD7	cpne1	Copine I OS=Danio rerio OX=7955 GN=cpne1 PE=1 SV=1	2	5.21	0.0148
A0A0S2I7K2	vclb	Vinculin b OS=Danio rerio OX=7955 GN=vclb PE=2 SV=1	14	5.18	0.000179
Q7ZUP4	eif5a2	Eukaryotic translation initiation factor 5A OS=Danio rerio OX=7955 GN=eif5a2 PE=1 SV=1	1	5.12	0.045
A2BEV6	nexn	Novel protein (Zgc:103442) OS=Danio rerio OX=7955 GN=nexn PE=4 SV=2	13	5.12	0.0173
A0A0R4IHT4	rock2a	Rho-associated, coiled-coil-containing protein kinase 2a OS=Danio rerio OX=7955 GN=rock2a PE=1 SV=1	12	5.05	0.0259
Q9PVK4	ldhba	L-lactate dehydrogenase B-A chain OS=Danio rerio OX=7955 GN=ldhba PE=2 SV=4	16	4.98	0.0324
A0A0R4IY49	vtg7	Vitellogenin 7 OS=Danio rerio OX=7955 GN=vtg7 PE=1 SV=1	9	4.91	0.0398
B8A5L6	fga	Fibrinogen alpha chain OS=Danio rerio OX=7955 GN=fga PE=1 SV=1	20	4.8	0.0239
A0A0R4IQ97	pa2g4a	Proliferation-associated 2G4, a OS=Danio rerio OX=7955 GN=pa2g4a PE=1 SV=1	2	4.72	0.0337
A3KMH5	hadhab	Zgc:158138 protein OS=Danio rerio OX=7955 GN=hadhab PE=2 SV=1	2	4.62	0.0102
E7FCV2	c5	Complement component 5 OS=Danio rerio OX=7955 GN=c5 PE=1 SV=2	1	4.56	0.0401
Q7ZVA4	s100a10b	Protein S100 OS=Danio rerio OX=7955 GN=s100a10b PE=1 SV=1	3	4.53	0.0483
A0A0R4IJ91	slmapa	Sarcolemma-associated protein a OS=Danio rerio OX=7955 GN=slmapa PE=1 SV=1	21	4.53	0.0179
F1R2C3	jph1a	Junctophilin 1a OS=Danio rerio OX=7955 GN=jph1a PE=4 SV=1	22	4.44	0.0196
Q6DGI6	txn	Thioredoxin OS=Danio rerio OX=7955 GN=txn PE=1 SV=1	3	4.3	0.0421
F8W4U4	xirp2a	Xin actin-binding repeat-containing 2a OS=Danio rerio OX=7955 GN=xirp2a PE=3 SV=1	16	4.15	0.0027
E7F9N7	dync1h1	Dynein, cytoplasmic 1, heavy chain 1 OS=Danio rerio OX=7955 GN=dync1h1 PE=1 SV=1	2	4.12	0.0118
Q1ECX3	tgm2b	Tgm2b protein OS=Danio rerio OX=7955 GN=tgm2b PE=1 SV=1	4	3.95	0.004
Q6PHD6	ilk	Integrin-linked kinase OS=Danio rerio OX=7955 GN=ilk PE=1 SV=1	6	3.91	0.0168
A8E590	eif4a1b	Eif4a1b protein OS=Danio rerio OX=7955 GN=eif4a1b PE=2 SV=1	2	3.84	0.046
O57521	hsp90ab1	Heat shock protein HSP 90-beta OS=Danio rerio OX=7955 GN=hsp90ab1 PE=1 SV=2	2	3.8	0.0201
E7FBX4	mark2a	Non-specific serine/threonine protein kinase OS=Danio rerio OX=7955 GN=mark2a PE=1 SV=1	6	3.72	0.0184
Q66I24	ass1	Argininosuccinate synthase OS=Danio rerio OX=7955 GN=ass1 PE=2 SV=1	7	3.71	0.0114
Q6DGW6	rps15	Ribosomal protein S15 OS=Danio rerio OX=7955 GN=rps15 PE=2 SV=1	6	3.66	0.0252
Q6GQL7	fhl1a	Fhla protein OS=Danio rerio OX=7955 GN=fhl1a PE=1 SV=1	5	3.59	0.035
Q4VBV1	uqcrb	Cytochrome b-c1 complex subunit 7 OS=Danio rerio OX=7955 GN=uqcrb PE=1 SV=1	5	3.5	0.0186
Q6NYU8	hnrnpaba	Heterogeneous nuclear ribonucleoprotein A/B OS=Danio rerio OX=7955 GN=hnrnpaba PE=1 SV=1	3	3.45	0.00105
A0A0R4IXW8	capzb	Capping protein (actin filament) muscle Z-line, beta OS=Danio rerio OX=7955 GN=capzb PE=1 SV=1	4	3.39	0.02
E7FEU8	prodhb	Proline dehydrogenase OS=Danio rerio OX=7955 GN=prodhb PE=1 SV=1	1	3.36	0.0329
Q9I9N0	dap1b	Dap1b OS=Danio rerio OX=7955 GN=dap1b PE=1 SV=1	2	3.32	0.00505
E7F131	tfr1b	Transferrin receptor 1b OS=Danio rerio OX=7955 GN=tfr1b PE=1 SV=2	17	3.31	0.0216
Q6TH07	flot1b	Flotillin 1 OS=Danio rerio OX=7955 GN=flot1b PE=1 SV=1	7	3.31	0.00336
E7FCN9	cspg4	Chondroitin sulfate proteoglycan 4 OS=Danio rerio OX=7955 GN=cspg4 PE=4 SV=1	31	3.27	0.0191
F1QAU6	tjp2b	Tight junction protein 2b (zona occludens 2) OS=Danio rerio OX=7955 GN=tjp2b PE=1 SV=2	10	3.26	0.0345
E7F0A1	pfn1	Profilin OS=Danio rerio OX=7955 GN=pfn1 PE=1 SV=1	2	3.25	0.0242
F1Q649	tns1b	Tensin 1b OS=Danio rerio OX=7955 GN=tns1b PE=1 SV=2	30	3.21	0.0492
A0A286YAF6	apobb.1	Apolipoprotein Bb, tandem duplicate 1 OS=Danio rerio OX=7955 GN=apobb.1 PE=1 SV=1	51	3.03	0.0208
Q6P5M3	rps9	Ribosomal protein S9 OS=Danio rerio OX=7955 GN=rps9 PE=1 SV=1	5	3	0.00988
Q90Z38	ranbp1	Ran-binding protein 1 OS=Danio rerio OX=7955 GN=ranbp1 PE=1 SV=1	2	2.98	0.0343
F1Q5Q3	serbp1a	SERPINE1 mRNA-binding protein 1a OS=Danio rerio OX=7955 GN=serbp1a PE=1 SV=1	7	2.9	0.00261
F1Q9F0	epb41l5	Erythrocyte membrane protein band 4.1-like 5 OS=Danio rerio OX=7955 GN=epb41l5 PE=1 SV=1	12	2.88	0.0141
I6LD67	pcdh2g28	Protocadherin cluster 2 gamma 28 OS=Danio rerio OX=7955 GN=pcdh2g28 PE=2 SV=1	3	2.87	0.0384
B8JKW4	c3a.1	Complement component c3a, duplicate 1 OS=Danio rerio OX=7955 GN=c3a.1 PE=1 SV=1	17	2.86	0.0324
A0A0R4IFE2	psmc1b	Proteasome 26S subunit, ATPase 1b OS=Danio rerio OX=7955 GN=psmc1b PE=1 SV=1	9	2.76	0.00364
A6NA21	cavin1b	Caveolae-associated protein 1b OS=Danio rerio OX=7955 GN=cavin1b PE=1 SV=1	6	2.74	0.0431
Q6DRD2	psmc6	26S protease regulatory subunit S10B OS=Danio rerio OX=7955 GN=psmc6 PE=1 SV=1	1	2.74	0.0142
F1QY46	spega	SPEG complex locus a OS=Danio rerio OX=7955 GN=spega PE=4 SV=1	7	2.73	0.0287
E7FBG4	E7FBG4	Uncharacterized protein OS=Danio rerio OX=7955 PE=4 SV=2	3	2.71	0.0292
F6NPI4	picalma	Phosphatidylinositol-binding clathrin assembly protein a OS=Danio rerio OX=7955 GN=picalma PE=1 SV=1	5	2.69	0.0401
F1QST2	arhgap21b	Rho GTPase-activating protein 21b OS=Danio rerio OX=7955 GN=arhgap21b PE=1 SV=1	4	2.65	0.0237
F1R833	nrap	Nebulin-related-anchoring protein OS=Danio rerio OX=7955 GN=nrap PE=4 SV=1	11	2.63	0.0205
A0A0G2KSV9	A0A0G2KSV9	Uncharacterized protein OS=Danio rerio OX=7955 PE=1 SV=1	9	2.62	0.0122
U3JA71	cacna1g	Voltage-dependent T-type calcium channel subunit alpha (Fragment) OS=Danio rerio OX=7955 GN=cacna1g PE=3 SV=1	10	2.62	0.0117
Q08BK3	dsc2l	Dsc2l protein (Fragment) OS=Danio rerio OX=7955 GN=dsc2l PE=2 SV=1	44	2.53	0.0333
A2RUY4	wasla	Zgc:158395 protein OS=Danio rerio OX=7955 GN=wasla PE=2 SV=1	3	2.5	0.00353
Q7ZVT1	ist1	Increased sodium tolerance 1 homolog (yeast) OS=Danio rerio OX=7955 GN=ist1 PE=1 SV=1	5	2.48	0.000645
F1QJC0	csrp3	Cysteine and glycine-rich protein 3 (cardiac LIM protein) OS=Danio rerio OX=7955 GN=csrp3 PE=1 SV=1	8	2.46	0.0213
Q6Q7X9	klhl31	Kelch-like protein 31 OS=Danio rerio OX=7955 GN=klhl31 PE=2 SV=1; Duplicate proteins: A2RRU8|A2RRU8_DANRE	2	2.42	0.0152
B7ZUY8	synm	Si:dkey-25f3.3 OS=Danio rerio OX=7955 GN=synm PE=2 SV=1	14	2.4	0.0252
A7MBX2	gprc5c	Gprc5c protein OS=Danio rerio OX=7955 GN=gprc5c PE=2 SV=1	7	2.33	0.0163
Q58XP5	fn1b	Fibronectin 1b OS=Danio rerio OX=7955 GN=fn1b PE=2 SV=1	28	2.22	0.0269
F1QTJ4	lrp5	Low density lipoprotein receptor-related protein 5 OS=Danio rerio OX=7955 GN=lrp5 PE=1 SV=1	16	2.21	0.0191
A0A0R4IV39	ctnnd1	Catenin (cadherin-associated protein), delta 1 OS=Danio rerio OX=7955 GN=ctnnd1 PE=1 SV=1	14	2.2	0.0441
E9QIM7	palm1a	Paralemmin 1a OS=Danio rerio OX=7955 GN=palm1a PE=1 SV=1	1	2.17	0.033
F1Q579	adgrl3.1	Adhesion G protein-coupled receptor L3.1 OS=Danio rerio OX=7955 GN=adgrl3.1 PE=3 SV=2	2	2.13	0.0326
A0A0R4IKN2	tln2a	Talin 2a OS=Danio rerio OX=7955 GN=tln2a PE=1 SV=1	13	2.08	0.0155
F5XVB3	vwf	von Willebrand factor OS=Danio rerio OX=7955 GN=vwf PE=2 SV=1	19	1.96	0.021
F1QY00	nmt1a	Glycylpeptide N-tetradecanoyltransferase OS=Danio rerio OX=7955 GN=nmt1a PE=1 SV=1	2	1.93	0.0375
Q66I42	msna	Moesin a OS=Danio rerio OX=7955 GN=msna PE=1 SV=1	32	1.9	0.0455
B3DJX4	kcnh6a	Potassium voltage-gated channel, subfamily H (Eag-related), member 2 OS=Danio rerio OX=7955 GN=kcnh6a PE=2 SV=1	32	1.9	0.0453
E7F032	si:ch73-44m9.1	Si:ch73-44m9.1 OS=Danio rerio OX=7955 GN=si:ch73-44m9.1 PE=4 SV=2	2	1.89	0.0336
A0A0R4IMK1	ahsa1b	AHA1, activator of heat shock protein ATPase homolog 1b OS=Danio rerio OX=7955 GN=ahsa1b PE=1 SV=1	1	1.84	0.0267
F8WK50	flii	Flightless I OS=Danio rerio OX=7955 GN=flii PE=2 SV=1	2	1.72	0.045
F1QG80	rpl22	Ribosomal protein L22 OS=Danio rerio OX=7955 GN=rpl22 PE=1 SV=1	4	1.68	0.0473
Q9PVF8	ctnna1	Catenin (Cadherin-associated protein), alpha OS=Danio rerio OX=7955 GN=ctnna1 PE=1 SV=1	22	1.68	0.0026
Q6DHS1	acta2	Actin, alpha 2, smooth muscle, aorta OS=Danio rerio OX=7955 GN=acta2 PE=1 SV=1	5	1.67	0.0453
E9QDE7	nnt2	Nicotinamide nucleotide transhydrogenase 2 (Fragment) OS=Danio rerio OX=7955 GN=nnt2 PE=1 SV=1	8	-1.5	0.0389
A4QNU3	cldn11b	Claudin OS=Danio rerio OX=7955 GN=cldn11b PE=1 SV=1	2	-1.6	0.0104
Q5XJK3	zgc:101840	Zgc:101840 OS=Danio rerio OX=7955 GN=zgc:101840 PE=2 SV=1	3	-1.65	0.0394
Q6PHE3	plin3	Si:rp71-61h23.4 protein (Fragment) OS=Danio rerio OX=7955 GN=plin3 PE=2 SV=1	8	-1.73	0.0139
Q7ZUY0	seta	SET nuclear proto-oncogene a OS=Danio rerio OX=7955 GN=seta PE=1 SV=1	2	-1.86	0.0371
Q6PGX4	hsc70	Heat shock cognate 70 OS=Danio rerio OX=7955 GN=hsc70 PE=1 SV=1	7	-1.94	0.0373
F1QAR7	mylk2	Myosin light chain kinase 2 OS=Danio rerio OX=7955 GN=mylk2 PE=4 SV=1	37	-1.96	0.00257
Q7T334	mdh2	Malate dehydrogenase OS=Danio rerio OX=7955 GN=mdh2 PE=1 SV=1	5	-2.01	0.0458
E9QHE3	rnf207b	RING finger protein 207 OS=Danio rerio OX=7955 GN=rnf207b PE=3 SV=1	4	-2.01	0.0337
A0A0R4IJR5	idh3g	Isocitrate dehydrogenase [NAD] subunit, mitochondrial OS=Danio rerio OX=7955 GN=idh3g PE=1 SV=1	6	-2.09	0.021
E7FG99	ccdc141	Coiled-coil domain-containing 141 OS=Danio rerio OX=7955 GN=ccdc141 PE=4 SV=3	21	-2.17	0.0249
Q498Z9	dkc1	Dyskeratosis congenita 1, dyskerin OS=Danio rerio OX=7955 GN=dkc1 PE=2 SV=1	3	-2.18	0.0345
F1QL68	huwe1	HECT, UBA and WWE domain-containing 1 (Fragment) OS=Danio rerio OX=7955 GN=huwe1 PE=1 SV=1	6	-2.21	0.00148
Q6DG71	uqcrc2a	Zgc:92453 OS=Danio rerio OX=7955 GN=uqcrc2a PE=2 SV=1	5	-2.24	0.0301
Q58EB8	im:7148382	LOC560949 protein (Fragment) OS=Danio rerio OX=7955 GN=im:7148382 PE=2 SV=1	4	-2.34	0.0465
F1QZM7	nol11	Nucleolar protein 11-like OS=Danio rerio OX=7955 GN=nol11 PE=1 SV=1	2	-2.4	0.0235
Q802V0	ldb3b	LIM domain-binding 3b OS=Danio rerio OX=7955 GN=ldb3b PE=1 SV=1	14	-2.42	0.029
F1QGC3	pdlim5b	PDZ and LIM domain 5b OS=Danio rerio OX=7955 GN=pdlim5b PE=1 SV=1	1	-2.81	0.00917
F1QB48	ppfibp2b	PTPRF-interacting protein,-binding protein 2b (liprin beta 2) OS=Danio rerio OX=7955 GN=ppfibp2b PE=4 SV=2	23	-2.87	0.008
A0A1L1QZF0	scrib	Protein scribble homolog OS=Danio rerio OX=7955 GN=scrib PE=1 SV=1	14	-3.05	0.00308
F1QDA6	acsl1b	Acyl-CoA synthetase long chain family member 1b OS=Danio rerio OX=7955 GN=acsl1b PE=1 SV=1	24	-3.19	0.0352
Q566R8	hspb2	Heat shock protein, alpha-crystallin-related, b2 OS=Danio rerio OX=7955 GN=hspb2 PE=1 SV=1	6	-3.2	0.0123
F1QSB8	ddx42	DEAD (Asp-Glu-Ala-Asp) box helicase 42 OS=Danio rerio OX=7955 GN=ddx42 PE=1 SV=1	3	-3.64	0.0189
Q6PBW7	rps19	Ribosomal protein S19 OS=Danio rerio OX=7955 GN=rps19 PE=1 SV=1	3	-3.72	0.0436
F1R7N8	ttn.2	Titin, tandem duplicate 2 OS=Danio rerio OX=7955 GN=ttn.2 PE=1 SV=2	12	-3.88	0.0126
Q6DHS3	rpl15	Ribosomal protein L15 OS=Danio rerio OX=7955 GN=rpl15 PE=1 SV=1	4	-3.95	0.0374
F1QRV6	nap1l4b	Nucleosome assembly protein 1-like 4b OS=Danio rerio OX=7955 GN=nap1l4b PE=1 SV=1	5	-4.16	0.00561
X1WCH5	znf839	Zinc finger protein 839 OS=Danio rerio OX=7955 GN=znf839 PE=1 SV=1	2	-4.18	0.00426
E7FD96	eef1a1l2	Elongation factor 1-alpha OS=Danio rerio OX=7955 GN=eef1a1l2 PE=1 SV=1	7	-4.19	0.00504
A0A0G2LAU9	gnaz	G protein subunit alpha z OS=Danio rerio OX=7955 GN=gnaz PE=1 SV=1	1	-4.47	0.0309
F1R3D9	phka2	Phosphorylase b kinase regulatory subunit OS=Danio rerio OX=7955 GN=phka2 PE=3 SV=2	1	-4.94	0.0238
A2RUY1	slc43a1b	Slc43a1b protein OS=Danio rerio OX=7955 GN=slc43a1b PE=2 SV=1	3	-5.31	0.037
F1Q6F0	phkb	Phosphorylase b kinase regulatory subunit OS=Danio rerio OX=7955 GN=phkb PE=1 SV=2	5	-6.13	0.0135
Q6GMK5	smpx	Small muscle protein, X-linked OS=Danio rerio OX=7955 GN=smpx PE=2 SV=1	2	-6.27	0.0265
E7F7T3	E7F7T3	Uncharacterized protein OS=Danio rerio OX=7955 PE=4 SV=2	2	-6.55	0.00653
F1QL61	si:ch211-229i14.2	Si:ch211-229i14.2 (Fragment) OS=Danio rerio OX=7955 GN=si:ch211-229i14.2 PE=4 SV=1	2	-7.99	0.00887
Q6ZM79	phactr2	Phosphatase and actin regulator (Fragment) OS=Danio rerio OX=7955 GN=phactr2 PE=3 SV=2	6	-8.26	0.00932
F1Q753	ppp6r2b	Protein phosphatase 6, regulatory subunit 2b OS=Danio rerio OX=7955 GN=ppp6r2b PE=1 SV=1	1	-13.8	0.00564
A7MCD6	prdx1	Zgc:110343 protein OS=Danio rerio OX=7955 GN=prdx1 PE=2 SV=1	1	-14.1	0.0126
Q71N41	gamt	Guanidinoacetate N-methyltransferase OS=Danio rerio OX=7955 GN=gamt PE=2 SV=2; Duplicate proteins: A8E5I0|A8E5I0_DANRE	3	-14.6	0.0338
Q6P0J0	ppp1r2	Protein phosphatase 1, regulatory (inhibitor) subunit 2 OS=Danio rerio OX=7955 GN=ppp1r2 PE=1 SV=1	1	-25.3	0.00056
A8KC20	pklr	Pyruvate kinase OS=Danio rerio OX=7955 GN=pklr PE=2 SV=1	1	-32.6	0.021
E7FCT0	kif26ab	Kinesin family member 26Ab OS=Danio rerio OX=7955 GN=kif26ab PE=3 SV=2	1	-49.9	0.00714
F1RB02	casz1	Castor zinc finger 1 OS=Danio rerio OX=7955 GN=casz1 PE=4 SV=2	1	-56	0.000843
Q5XJ54	glrx3	Glutaredoxin 3 OS=Danio rerio OX=7955 GN=glrx3 PE=2 SV=1; Duplicate proteins: B2GNX4|B2GNX4_DANRE	1	-65.6	0.0144
Q6NYL7	krt18b	Zgc:77517 OS=Danio rerio OX=7955 GN=zgc:77517 PE=1 SV=1	1	-67.2	0.0344
Q90487	hbaa1	Hemoglobin subunit alpha OS=Danio rerio OX=7955 GN=hbaa1 PE=2 SV=3; Duplicate proteins: Q1JQ69|Q1JQ69_DANRE	1	-97.5	0.00665
F1QUV8	jupb	Junction plakoglobin b OS=Danio rerio OX=7955 GN=jupb PE=4 SV=2	1	-192	0.000117
