# Supplementary material for: In vivo proximity labeling identifies cardiomyocyte protein networks during zebrafish heart regeneration
Source: eLife. 2021 Mar 25;10:e66079. doi: 10.7554/eLife.66079 (PMC8034980; doi:10.7554/eLife.66079)
Supplement: Supplementary file 3. — List of proteins from quantitative mass spectrometry analysis of cmlc2:birA2-GFP-CAAX ventricles. Regenerating BirA2-GFP-CAAX protein levels were normalized to uninjured BirA2-GFP-CAAX levels. Data are sorted by fold change. Accession number, gene name, description of gene, total unique peptide count, and fold change with p-values are shown. [file elife-66079-supp3.xlsx]

## Sheet: Caax pValue
Supplementary File 3: Normalized levels of BioID2 proteins from regenerating cmlc2:birA2-GFP-CAAX hearts.
Accession	Gene name	Description	TotalPeptide	CAAX 14d_CAAX Control_FC	CAAX 14d_CAAX Control_pval
A8KC20	pklr	Pyruvate kinase OS=Danio rerio OX=7955 GN=pklr PE=2 SV=1	1	57.2	0.00496
A0A0R4ITF0	stbd1	Starch-binding domain 1 OS=Danio rerio OX=7955 GN=stbd1 PE=4 SV=1	1	51.7	0.00402
Q6DG11	sart1	SART1, U4/U6.U5 tri-snRNP-associated protein 1 OS=Danio rerio OX=7955 GN=sart1 PE=1 SV=1	1	28.8	0.0154
Q0P4B4	tagln	Transgelin OS=Danio rerio OX=7955 GN=tagln PE=1 SV=1	16	28.7	0.0123
Q5U3K0	chchd6b	MICOS complex subunit OS=Danio rerio OX=7955 GN=chchd6b PE=2 SV=1	1	13.3	0.00423
E7FG26	efnb3a	Ephrin-B3a OS=Danio rerio OX=7955 GN=efnb3a PE=3 SV=1	2	12.2	0.00634
E7F1G8	ddx61	DEAD (Asp-Glu-Ala-Asp) box helicase 61 OS=Danio rerio OX=7955 GN=ddx61 PE=1 SV=1	2	11.9	0.0392
Q66I24	ass1	Argininosuccinate synthase OS=Danio rerio OX=7955 GN=ass1 PE=2 SV=1	7	11.4	0.0182
Q6A162	KRT40	Keratin, type I cytoskeletal 40 OS=Homo sapiens GN=KRT40 PE=1 SV=2	2	11.1	0.0318
Q7SZR4	pgam1a	Phosphoglycerate mutase OS=Danio rerio OX=7955 GN=pgam1a PE=1 SV=1	1	11	0.00368
A8WGN0	krt8	Keratin 8 OS=Danio rerio OX=7955 GN=krt8 PE=2 SV=1	2	9.33	0.0248
E7F4K4	kif1aa	Kinesin family member 1Aa OS=Danio rerio OX=7955 GN=kif1aa PE=3 SV=2	1	8.02	0.0149
Q7ZUY0	seta	SET nuclear proto-oncogene a OS=Danio rerio OX=7955 GN=seta PE=1 SV=1	2	7.11	0.0202
F1QC03	zyx	Zyxin OS=Danio rerio OX=7955 GN=zyx PE=1 SV=1	7	6.18	0.027
Q7ZU59	h2afvb	Histone H2A (Fragment) OS=Danio rerio OX=7955 GN=h2afvb PE=2 SV=1	4	6.02	0.0418
F1QJU0	wu:fc21g02	Wu:fc21g02 OS=Danio rerio OX=7955 GN=wu:fc21g02 PE=1 SV=2	2	6	0.00807
E7F4I8	ppip5k1b	Diphosphoinositol pentakisphosphate kinase 1b OS=Danio rerio OX=7955 GN=ppip5k1b PE=3 SV=2	2	5.69	0.0234
Q6DGI6	txn	Thioredoxin OS=Danio rerio OX=7955 GN=txn PE=1 SV=1	3	5.48	0.00343
Q6NYJ5	syncripl	Synaptotagmin-binding, cytoplasmic RNA-interacting protein,-like OS=Danio rerio OX=7955 GN=syncripl PE=1 SV=1	3	5.42	0.0284
A0A0R4IS05	nme3	Nucleoside diphosphate kinase OS=Danio rerio OX=7955 GN=nme3 PE=1 SV=1	1	5.4	0.0212
Q7ZU99	vcp	Transitional endoplasmic reticulum ATPase OS=Danio rerio OX=7955 GN=vcp PE=1 SV=1	2	4.98	0.00774
A0A0R4IDK6	nap1l1	Nucleosome assembly protein 1-like 1 OS=Danio rerio OX=7955 GN=nap1l1 PE=1 SV=1	6	4.35	0.036
F1Q6K8	svila	Supervillin a OS=Danio rerio OX=7955 GN=svila PE=4 SV=1	7	4.23	0.011
U3JA36	svila	Supervillin a (Fragment) OS=Danio rerio OX=7955 GN=svila PE=4 SV=1	2	3.9	0.018
F1Q8D2	nsfl1c	NSFL1 (p97) cofactor (p47) OS=Danio rerio OX=7955 GN=nsfl1c PE=1 SV=1	5	3.7	0.0392
A5WWE9	flrt2	Fibronectin leucine-rich transmembrane protein 2 OS=Danio rerio OX=7955 GN=flrt2 PE=4 SV=1	3	3.69	0.00356
Q6PHK6	purb	Transcriptional activator protein Pur-beta OS=Danio rerio OX=7955 GN=purb PE=2 SV=3	1	3.66	0.0492
A1L1R8	cd276	Zgc:158279 OS=Danio rerio OX=7955 GN=cd276 PE=2 SV=1	1	3.61	0.00865
Q804G9	anxa2a	Annexin OS=Danio rerio OX=7955 GN=anxa2a PE=2 SV=1	43	3.49	0.00339
Q6P0V6	rpl8	60S ribosomal protein L8 OS=Danio rerio OX=7955 GN=rpl8 PE=2 SV=3	1	3.26	0.0209
Q66HW2	ehd1b	EH-domain containing 1 OS=Danio rerio OX=7955 GN=ehd1b PE=1 SV=1	30	3.25	0.00122
A0A1W6S8R0	myo18b	Myosin XVIIIb OS=Danio rerio OX=7955 GN=myo18b PE=2 SV=1	1	2.91	0.00238
A0A0R4ICK7	cat	Catalase OS=Danio rerio OX=7955 GN=cat PE=1 SV=1	3	2.89	0.0473
E7FFN2	alpk3a	Alpha-kinase 3a OS=Danio rerio OX=7955 GN=alpk3a PE=4 SV=1	2	2.88	0.0357
A6NA21	cavin1b	Caveolae-associated protein 1b OS=Danio rerio OX=7955 GN=cavin1b PE=1 SV=1	6	2.81	0.0216
Q92051	cahz	Carbonic anhydrase OS=Danio rerio OX=7955 GN=cahz PE=1 SV=2	5	2.76	0.0244
F1Q6F0	phkb	Phosphorylase b kinase regulatory subunit OS=Danio rerio OX=7955 GN=phkb PE=1 SV=2	5	2.69	0.0286
A0A0R4I9B3	camk2d2	Calcium/calmodulin-dependent protein kinase type II delta 2 chain OS=Danio rerio OX=7955 GN=camk2d2 PE=1 SV=1	10	2.69	0.047
F1QGI3	rpl23a	Ribosomal protein L23a OS=Danio rerio OX=7955 GN=rpl23a PE=1 SV=1	3	2.65	0.00716
Q6IQP4	rap1aa	RAP1A, member of RAS oncogene family OS=Danio rerio OX=7955 GN=rap1aa PE=1 SV=1	1	2.54	0.0158
Q90Y50	cxadr	Coxsackievirus and adenovirus receptor homolog OS=Danio rerio OX=7955 GN=cxadr PE=2 SV=1; Duplicate proteins: B7ZUW2|B7ZUW2_DANRE	9	2.46	0.000233
A0A0R4IGU0	cnn1b	Calponin OS=Danio rerio OX=7955 GN=cnn1b PE=1 SV=1	16	2.46	0.00036
E9QD79	cltcb	Clathrin heavy chain OS=Danio rerio OX=7955 GN=cltcb PE=1 SV=2	4	2.2	0.00877
E7FAK6	pcdh2g5	Protocadherin 2 gamma 5 OS=Danio rerio OX=7955 GN=pcdh2g5 PE=4 SV=1	12	2.19	0.00768
Q7ZVA4	s100a10b	Protein S100 OS=Danio rerio OX=7955 GN=s100a10b PE=1 SV=1	3	2.19	0.00878
B0CLW6	pvrl2l	Poliovirus receptor-related 2-like OS=Danio rerio OX=7955 GN=pvrl2l PE=1 SV=1	8	2.17	0.0107
E7FCN9	cspg4	Chondroitin sulfate proteoglycan 4 OS=Danio rerio OX=7955 GN=cspg4 PE=4 SV=1	31	2.14	0.0144
F1R3D3	gapdhs	Glyceraldehyde-3-phosphate dehydrogenase OS=Danio rerio OX=7955 GN=gapdhs PE=1 SV=1	10	2.11	0.0362
A9C3S8	si:dkey-20d21.12	Si:dkey-20d21.12 OS=Danio rerio OX=7955 GN=si:dkey-20d21.12 PE=4 SV=1	5	2.09	0.0418
Q6PBW7	rps19	Ribosomal protein S19 OS=Danio rerio OX=7955 GN=rps19 PE=1 SV=1	3	2.03	0.0425
A0A0R4IXW8	capzb	Capping protein (actin filament) muscle Z-line, beta OS=Danio rerio OX=7955 GN=capzb PE=1 SV=1	4	1.99	0.0211
F1QAM8	vim	Vimentin OS=Danio rerio OX=7955 GN=vim PE=1 SV=1	2	1.98	0.024
Q803D7	pdia3	Protein disulfide-isomerase (Fragment) OS=Danio rerio OX=7955 GN=pdia3 PE=2 SV=1	3	1.9	0.0214
B8A4V2	anxa11a	Annexin OS=Danio rerio OX=7955 GN=anxa11a PE=1 SV=1	1	1.89	0.00598
F8W4U4	xirp2a	Xin actin-binding repeat-containing 2a OS=Danio rerio OX=7955 GN=xirp2a PE=3 SV=1	16	1.86	0.00704
A0A0R4IGK4	stom	Stomatin OS=Danio rerio OX=7955 GN=stom PE=1 SV=1	6	1.81	0.033
F1R3T1	si:dkeyp-77h1.4	Si:dkeyp-77h1.4 OS=Danio rerio OX=7955 GN=si:dkeyp-77h1.4 PE=1 SV=2	15	1.8	0.0359
Q6PBZ1	rpl7a	Ribosomal protein L7a OS=Danio rerio OX=7955 GN=rpl7a PE=1 SV=1	3	1.79	0.0291
F1REW4	atp10d	Phospholipid-transporting ATPase OS=Danio rerio OX=7955 GN=atp10d PE=3 SV=1	6	1.79	0.0312
E7F1E3	abcb4	ATP-binding cassette, sub-family B (MDR/TAP), member 4 OS=Danio rerio OX=7955 GN=abcb4 PE=4 SV=1	9	1.72	0.0247
Q6DGW6	rps15	Ribosomal protein S15 OS=Danio rerio OX=7955 GN=rps15 PE=2 SV=1	6	1.7	0.0302
Q6P696	glo1	Lactoylglutathione lyase OS=Danio rerio OX=7955 GN=glo1 PE=1 SV=1	4	1.66	0.00795
Q5RHJ3	daam1b	Dishevelled-associated activator of morphogenesis 1b OS=Danio rerio OX=7955 GN=daam1b PE=1 SV=1	14	1.62	0.00381
Q0P3X9	zgc:153713	Zgc:153713 OS=Danio rerio OX=7955 GN=zgc:153713 PE=2 SV=1	3	1.59	0.00352
Q4V966	sept7a	Sept7a protein OS=Danio rerio OX=7955 GN=sept7a PE=2 SV=1	3	1.58	0.0444
Q8JHI0	slc25a5	Solute carrier family 25 (mitochondrial carrier; adenine nucleotide translocator), member 5 OS=Danio rerio OX=7955 GN=slc25a5 PE=1 SV=1	21	-1.54	0.0422
Q502Q3	efnb3b	Efnb3 OS=Danio rerio OX=7955 GN=efnb3b PE=1 SV=1	5	-1.58	0.0289
F6NYT7	gpx1a	Glutathione peroxidase OS=Danio rerio OX=7955 GN=gpx1a PE=1 SV=1	5	-1.61	0.0195
A0A0G2L2U8	A0A0G2L2U8	Uncharacterized protein OS=Danio rerio OX=7955 PE=4 SV=1	15	-1.62	0.0412
A0A0R4IBJ3	add3a	Adducin 3 (gamma) a OS=Danio rerio OX=7955 GN=add3a PE=1 SV=2	31	-1.63	0.0287
Q08BA1	atp5fa1	ATP synthase subunit alpha OS=Danio rerio OX=7955 GN=atp5fa1 PE=1 SV=1	44	-1.63	0.0438
Q5RH26	atp5f1c	ATP synthase subunit gamma OS=Danio rerio OX=7955 GN=atp5f1c PE=1 SV=1	9	-1.64	0.00346
B0V0Y4	palm1b	Paralemmin 1b OS=Danio rerio OX=7955 GN=palm1b PE=4 SV=1	29	-1.65	0.0326
Q6PGX4	hsc70	Heat shock cognate 70 OS=Danio rerio OX=7955 GN=hsc70 PE=1 SV=1	7	-1.73	0.018
F1RCH4	notch2	Notch 2 OS=Danio rerio OX=7955 GN=notch2 PE=4 SV=1	2	-1.75	0.0461
E7F0Y5	rictorb	RPTOR-independent companion of MTOR, complex 2b OS=Danio rerio OX=7955 GN=rictorb PE=4 SV=3	2	-1.84	0.00181
B0F0D0	cacnb4a	Calcium channel, voltage-dependent, beta 4a subunit OS=Danio rerio OX=7955 GN=cacnb4a PE=2 SV=1	10	-1.84	0.0138
E7FG99	ccdc141	Coiled-coil domain-containing 141 OS=Danio rerio OX=7955 GN=ccdc141 PE=4 SV=3	21	-1.89	0.0122
Q568F6	adss	Adenylosuccinate synthetase isozyme 2 OS=Danio rerio OX=7955 GN=adss PE=2 SV=1	1	-1.95	0.0218
A4QNV1	pfkmb	ATP-dependent 6-phosphofructokinase OS=Danio rerio OX=7955 GN=pfkmb PE=2 SV=1	9	-1.96	0.0193
A9C3T0	prkar2aa	Protein kinase, cAMP-dependent, regulatory, type II, alpha A OS=Danio rerio OX=7955 GN=prkar2aa PE=1 SV=1	7	-1.96	0.046
A0A0R4IAJ9	add1	Adducin 1 (alpha) OS=Danio rerio OX=7955 GN=add1 PE=1 SV=1	33	-1.97	0.033
I3ITQ9	si:ch211-18i17.2	Si:ch211-18i17.2 OS=Danio rerio OX=7955 GN=si:ch211-18i17.2 PE=4 SV=1	8	-1.97	0.0447
E3W9A6	sema6e	Sema domain, transmembrane domain (TM), and cytoplasmic domain, (semaphorin) 6E OS=Danio rerio OX=7955 GN=sema6e PE=2 SV=1	4	-1.99	0.00678
A7MCL8	etfb	Etfb protein OS=Danio rerio OX=7955 GN=etfb PE=2 SV=1	7	-2	0.015
F1QAH5	crybg1a	Crystallin beta-gamma domain-containing 1a OS=Danio rerio OX=7955 GN=aim1a PE=1 SV=2	4	-2.05	0.0187
F1R0Q1	slc2a1b	Solute carrier family 2 (facilitated glucose transporter), member 1b OS=Danio rerio OX=7955 GN=slc2a1b PE=3 SV=2	3	-2.06	0.018
A0A0R4IJ71	plecb	Plectin b OS=Danio rerio OX=7955 GN=plecb PE=1 SV=1	66	-2.1	0.036
F1Q9F0	epb41l5	Erythrocyte membrane protein band 4.1-like 5 OS=Danio rerio OX=7955 GN=epb41l5 PE=1 SV=1	12	-2.16	0.0149
Q503M6	acot20	Si:dkey-11e23.4 protein (Fragment) OS=Danio rerio OX=7955 GN=acot20 PE=2 SV=1	4	-2.17	0.0392
F1QPC0	vtg3	Vitellogenin 3, phosvitinless (Fragment) OS=Danio rerio OX=7955 GN=vtg3 PE=1 SV=2	2	-2.19	0.0228
A0A140LFM7	zgc:172302	Zgc:172302 (Fragment) OS=Danio rerio OX=7955 GN=zgc:172302 PE=4 SV=1	3	-2.19	0.024
Q1LU92	ctnnal1	Catenin (cadherin-associated protein), alpha-like 1 OS=Danio rerio OX=7955 GN=ctnnal1 PE=1 SV=2	5	-2.23	0.0159
A0A0G2L6L8	sb:eu779	EPH receptor B3 OS=Danio rerio OX=7955 PE=1 SV=1	3	-2.23	0.0266
Q58EE0	mtmr1b	Mtmr1b protein OS=Danio rerio OX=7955 GN=mtmr1b PE=2 SV=1	5	-2.25	0.0175
A0A0R4IP09	plekha6	Pleckstrin homology domain-containing, family A member 6 OS=Danio rerio OX=7955 GN=plekha6 PE=1 SV=1	13	-2.26	0.0139
F1QU77	zmp:0000001167	Zmp:0000001167 OS=Danio rerio OX=7955 GN=zmp:0000001167 PE=4 SV=2	1	-2.29	0.0252
Q7SYB8	gys1	Glycogen [starch] synthase OS=Danio rerio OX=7955 GN=gys1 PE=1 SV=1	3	-2.32	0.0344
E9QDE7	nnt2	Nicotinamide nucleotide transhydrogenase 2 (Fragment) OS=Danio rerio OX=7955 GN=nnt2 PE=1 SV=1	8	-2.33	0.00956
A7MBX2	gprc5c	Gprc5c protein OS=Danio rerio OX=7955 GN=gprc5c PE=2 SV=1	7	-2.37	0.00847
F1QAV3	yeats2	YEATS domain-containing 2 OS=Danio rerio OX=7955 GN=yeats2 PE=1 SV=2	3	-2.4	0.0355
Q5TZI2	ppm1ab	Protein phosphatase, Mg2+/Mn2+-dependent, 1Ab OS=Danio rerio OX=7955 GN=ppm1ab PE=3 SV=1	4	-2.46	0.0103
Q4VBU0	bckdha	2-oxoisovalerate dehydrogenase subunit alpha OS=Danio rerio OX=7955 GN=bckdha PE=1 SV=1	5	-2.5	0.0411
F1R9C3	adcy6b	Adenylate cyclase OS=Danio rerio OX=7955 GN=adcy6b PE=3 SV=2	15	-2.54	0.0252
A0A0R4IAS5	abcc9	ATP-binding cassette, sub-family C (CFTR/MRP), member 9 OS=Danio rerio OX=7955 GN=abcc9 PE=4 SV=1	6	-2.59	0.0457
F6NYL9	hcn4	Hyperpolarization-activated cyclic nucleotide-gated potassium channel 4 (Fragment) OS=Danio rerio OX=7955 GN=hcn4 PE=4 SV=1	20	-2.6	0.015
B2CZC1	atp2b4	Calcium-transporting ATPase OS=Danio rerio OX=7955 GN=atp2b4 PE=2 SV=1	6	-2.63	0.00471
F1QWX3	gpr22a	G protein-coupled receptor 22a OS=Danio rerio OX=7955 GN=gpr22a PE=4 SV=2	2	-2.66	0.0438
A0A0R4ICE3	insrb	Tyrosine-protein kinase receptor OS=Danio rerio OX=7955 GN=insrb PE=1 SV=1	3	-2.67	0.0147
E9QFJ1	pfkpb	ATP-dependent 6-phosphofructokinase OS=Danio rerio OX=7955 GN=pfkpb PE=1 SV=1	8	-2.68	0.0169
D1GJ55	actn2b	Actn2 OS=Danio rerio OX=7955 GN=actn2b PE=2 SV=1	16	-2.68	0.0408
A0A0R4IHT0	slc25a12	Solute carrier family 25 (aspartate/glutamate carrier), member 12 OS=Danio rerio OX=7955 GN=slc25a12 PE=1 SV=1	25	-2.7	0.00711
Q7ZVM2	slc16a3	Monocarboxylate transporter 4b OS=Danio rerio OX=7955 GN=slc16a3 PE=2 SV=1	2	-2.71	0.0209
A0A2C9F1K3	scn4ab	Sodium channel protein OS=Danio rerio OX=7955 GN=scn4ab PE=3 SV=1	6	-2.72	0.00231
A5PL98	sdhb	Succinate dehydrogenase [ubiquinone] iron-sulfur subunit, mitochondrial OS=Danio rerio OX=7955 GN=sdhb PE=2 SV=1	3	-2.74	0.038
Q6DG71	uqcrc2a	Zgc:92453 OS=Danio rerio OX=7955 GN=uqcrc2a PE=2 SV=1	5	-2.76	0.00407
A0A0R4II62	stk11	Serine/threonine kinase 11 OS=Danio rerio OX=7955 GN=stk11 PE=1 SV=1	3	-2.78	0.00278
A0A0R4IAH3	eci2	Enoyl-CoA delta isomerase 2 OS=Danio rerio OX=7955 GN=eci2 PE=1 SV=1	3	-2.85	0.00383
Q6ZM79	phactr2	Phosphatase and actin regulator (Fragment) OS=Danio rerio OX=7955 GN=phactr2 PE=3 SV=2	6	-2.89	0.0341
F1QEF5	mrpl48	Mitochondrial ribosomal protein L48 OS=Danio rerio OX=7955 GN=mrpl48 PE=1 SV=1	4	-2.9	0.0238
Q6P980	sod2	Superoxide dismutase OS=Danio rerio OX=7955 GN=sod2 PE=1 SV=1	2	-2.91	0.0306
D2CKK9	gpx4a	Glutathione peroxidase OS=Danio rerio OX=7955 GN=gpx4a PE=2 SV=1	2	-2.93	0.0452
Q9PU58	nipsnap2	Protein NipSnap homolog 2 OS=Danio rerio OX=7955 GN=nipsnap2 PE=2 SV=2	5	-2.95	0.00467
E7F9M6	pfkla	ATP-dependent 6-phosphofructokinase OS=Danio rerio OX=7955 GN=pfkla PE=1 SV=1	3	-3.06	0.00446
Q90Z38	ranbp1	Ran-binding protein 1 OS=Danio rerio OX=7955 GN=ranbp1 PE=1 SV=1	2	-3.09	0.0165
A0A140LGY9	kcnj	Potassium inwardly-rectifying channel, subfamily J, member 14 OS=Danio rerio OX=7955 GN=kcnj14 PE=3 SV=1	4	-3.12	0.0365
F1QDA6	acsl1b	Acyl-CoA synthetase long chain family member 1b OS=Danio rerio OX=7955 GN=acsl1b PE=1 SV=1	24	-3.14	0.0176
F1QGK0	gpd1b	Glycerol-3-phosphate dehydrogenase [NAD(+)] OS=Danio rerio OX=7955 GN=gpd1b PE=1 SV=1	4	-3.23	0.00472
Q6DGL0	rpl18	Ribosomal protein L18 OS=Danio rerio OX=7955 GN=rpl18 PE=1 SV=1	2	-3.24	0.0315
K7DY29	cpt1ab	Carnitine palmitoyltransferase 1Ab (liver) OS=Danio rerio OX=7955 GN=cpt1ab PE=1 SV=1	5	-3.25	0.0475
E7FE29	myo18ab	Myosin XVIIIAb OS=Danio rerio OX=7955 GN=myo18ab PE=1 SV=2	34	-3.33	0.0176
A0A0G2L2K5	scarb2b	Uncharacterized protein OS=Danio rerio OX=7955 GN=scarb2b PE=1 SV=1	15	-3.35	0.0464
Q7ZUG5	rps21	40S ribosomal protein S21 OS=Danio rerio OX=7955 GN=rps21 PE=3 SV=1	2	-3.37	0.00829
F1RBU6	aifm1	Apoptosis-inducing factor, mitochondrion-associated 1 OS=Danio rerio OX=7955 GN=aifm1 PE=1 SV=1	3	-3.37	0.0217
A0A0R4IKN2	tln2a	Talin 2a OS=Danio rerio OX=7955 GN=tln2a PE=1 SV=1	13	-3.4	0.0387
Q1LYB7	rpl13a	Ribosomal protein L13a OS=Danio rerio OX=7955 GN=rpl13a PE=1 SV=1	2	-3.68	0.0424
Q6AZA2	ndufv1	NADH dehydrogenase [ubiquinone] flavoprotein 1, mitochondrial OS=Danio rerio OX=7955 GN=ndufv1 PE=1 SV=1	2	-3.76	0.0171
F1QIB3	dbnlb	Drebrin-like b OS=Danio rerio OX=7955 GN=dbnlb PE=1 SV=1	1	-3.88	0.0146
F1Q7Q9	fam131c	Family with sequence similarity 131, member C OS=Danio rerio OX=7955 GN=fam131c PE=4 SV=1	3	-3.92	0.0386
A8E5M6	taf9	TAF9 RNA polymerase II, TATA box binding protein (TBP)-associated factor OS=Danio rerio OX=7955 GN=taf9 PE=2 SV=1	1	-4	0.0284
K7W5A6	shroom3	Shroom3v1 OS=Danio rerio OX=7955 GN=shroom3 PE=2 SV=1	2	-4.01	0.0343
F1R7N8	ttn.2	Titin, tandem duplicate 2 OS=Danio rerio OX=7955 GN=ttn.2 PE=1 SV=2	12	-4.51	0.0222
A0A0R4IUH6	ndufa4l	NADH dehydrogenase (ubiquinone) 1 alpha subcomplex 4,-like OS=Danio rerio OX=7955 GN=ndufa4l PE=1 SV=1	2	-4.58	0.0134
B3DIT9	pdk4	Si:rp71-57j15.4 OS=Danio rerio OX=7955 GN=pdk4 PE=2 SV=1	4	-4.73	0.00492
F1Q4X1	col6a3	Collagen, type VI, alpha 3 OS=Danio rerio OX=7955 GN=col6a3 PE=1 SV=2	18	-4.8	0.0133
Q4VBV1	uqcrb	Cytochrome b-c1 complex subunit 7 OS=Danio rerio OX=7955 GN=uqcrb PE=1 SV=1	5	-4.86	0.00592
Q6PBI0	sucla2	Succinate--CoA ligase [ADP-forming] subunit beta, mitochondrial OS=Danio rerio OX=7955 GN=sucla2 PE=1 SV=1	6	-4.87	0.00488
F1QQ42	ndufa1	NADH dehydrogenase (ubiquinone) 1 alpha subcomplex, 1 OS=Danio rerio OX=7955 GN=ndufa1 PE=1 SV=1	1	-5.54	5.71e-05
A0A140LG52	si:dkey-31j3.11	Si:dkey-31j3.11 OS=Danio rerio OX=7955 GN=si:dkey-31j3.11 PE=4 SV=1	1	-5.87	0.00332
Q5TZG5	ezrb	Ezrin OS=Danio rerio OX=7955 GN=ezrb PE=1 SV=1	2	-5.93	0.00202
Q1LXK8	CH211-262K23.4-001	Novel protein containing an Acyl-CoA dehydrogenase, N-terminal and C-terminal domain (Fragment) OS=Danio rerio OX=7955 GN=CH211-262K23.4-001 PE=3 SV=1	2	-6.3	0.0147
P19012	KRT15	Keratin, type I cytoskeletal 15 OS=Homo sapiens GN=KRT15 PE=1 SV=3	4	-6.67	0.021
B0R197	vdac3	Voltage-dependent anion channel 3 OS=Danio rerio OX=7955 GN=vdac3 PE=1 SV=1	1	-6.8	0.0283
A2BEV6	nexn	Novel protein (Zgc:103442) OS=Danio rerio OX=7955 GN=nexn PE=4 SV=2	13	-7.05	0.00194
F1Q6P3	col6a1	Collagen, type VI, alpha 1 OS=Danio rerio OX=7955 GN=col6a1 PE=1 SV=2	7	-7.52	0.0156
E7FCT0	kif26ab	Kinesin family member 26Ab OS=Danio rerio OX=7955 GN=kif26ab PE=3 SV=2	1	-7.71	0.033
Q8JH37	vtg1	Vitellogenin 1 (Fragment) OS=Danio rerio OX=7955 GN=vtg1 PE=2 SV=1	1	-8	0.0245
A0A286Y8Z9	tenm1	Teneurin transmembrane protein 1 OS=Danio rerio OX=7955 GN=tenm1 PE=4 SV=1	1	-8.19	0.00291
F5XVB3	vwf	von Willebrand factor OS=Danio rerio OX=7955 GN=vwf PE=2 SV=1	19	-8.22	0.0013
F1QLY0	ccdc141	Coiled-coil domain-containing 141 (Fragment) OS=Danio rerio OX=7955 GN=ccdc141 PE=4 SV=2	1	-8.31	0.0057
A0A0G2KF42	arhgef25a	Uncharacterized protein OS=Danio rerio OX=7955 GN=arhgef25a PE=4 SV=1	1	-8.71	0.0403
Q7T1K0	rpl17	Ribosomal protein L17 OS=Danio rerio OX=7955 GN=rpl17 PE=1 SV=1	4	-9.05	0.000171
A3KMH5	hadhab	Zgc:158138 protein OS=Danio rerio OX=7955 GN=hadhab PE=2 SV=1	2	-9.89	0.0114
A0A1L1QZM7	scrib	Protein scribble homolog OS=Danio rerio OX=7955 GN=scrib PE=1 SV=1	1	-10	0.0163
A0A0R4J7R2	myo18aa	Myosin XVIIIAa OS=Danio rerio OX=7955 GN=myo18aa PE=3 SV=1	1	-10.3	0.0205
Q6DGU9	gstk1	Glutathione S-transferase kappa OS=Danio rerio OX=7955 GN=gstk1 PE=1 SV=1	4	-10.6	0.00678
E7FAI0	LOC100334619	Uncharacterized protein OS=Danio rerio OX=7955 GN=LOC100334619 PE=4 SV=2	1	-11.2	0.0153
Q6PE34	zgc:65894	Tubulin beta chain OS=Danio rerio OX=7955 GN=zgc:65894 PE=1 SV=1	2	-11.9	0.0106
A1A5X4	add1	adducin 1 (Alpha) OS=Danio rerio OX=7955 GN=add1 PE=1 SV=1	1	-13.4	0.0064
Q6PBT1	rps27.2	40S ribosomal protein S27 OS=Danio rerio OX=7955 GN=rps27.2 PE=1 SV=1	1	-14.6	0.00151
E9QBC9	cast	Calpastatin (Fragment) OS=Danio rerio OX=7955 GN=cast PE=1 SV=1	2	-18.4	0.0125
A0A0R4IA64	eef1da	Eukaryotic translation elongation factor 1 delta a (guanine nucleotide exchange protein) OS=Danio rerio OX=7955 GN=eef1da PE=1 SV=1	2	-37.7	0.00197
F8W315	palld	Palladin, cytoskeletal-associated protein OS=Danio rerio OX=7955 GN=palld PE=1 SV=3	20	-102	0.00737
