# Supplementary material for: In vivo proximity labeling identifies cardiomyocyte protein networks during zebrafish heart regeneration
Source: eLife. 2021 Mar 25;10:e66079. doi: 10.7554/eLife.66079 (PMC8034980; doi:10.7554/eLife.66079)
Supplement: Supplementary file 4. — List of proteins from quantitative mass spectrometry analysis of cmlc2:erbb2-birA2-HA ventricles. Regenerating ErbB2-BirA2-HA protein levels were normalized to uninjured ErbB2-BirA2-HA levels. Data are sorted by fold change. Accession number, gene name, description of gene, total unique peptide count, and fold change with p-values are shown. [file elife-66079-supp4.xlsx]

## Sheet: cmlc2_ErbB2-BirA2-HA
Supplementary File 4 : Normalized levels of BioID2 proteins from regenerating cmlc2:erbb2-birA2-HA-P2A-GFP hearts.
Accession	Gene Name	Description	Peptides	ErbB2 Cre(p)_v_ErbB2 Cre(n)_FC	ErbB2 Cre(p)_v_ErbB2 Cre(n)_Pval
F6NJU6	zgc:100918	Zgc:100918 OS=Danio rerio OX=7955 GN=zgc:100918 PE=1 SV=1	2	34	4.56e-05
A0A0R4IVE2	usp10	Ubiquitin-specific peptidase 10 OS=Danio rerio OX=7955 GN=usp10 PE=1 SV=1	1	23.7	0.00304
Q6P0I2	psma8	Proteasome subunit alpha type OS=Danio rerio OX=7955 GN=psma8 PE=1 SV=1	2	21.5	0.00668
A0A286YBE8	sars	Serine--tRNA ligase, cytoplasmic OS=Danio rerio OX=7955 GN=sars PE=1 SV=1	1	19.5	0.00681
Q6TGV6	psma5	Proteasome subunit alpha type OS=Danio rerio OX=7955 GN=psma5 PE=1 SV=1	1	17	0.0166
A0A0R4IPH2	tubb2b	Tubulin beta chain OS=Danio rerio OX=7955 GN=tubb2b PE=1 SV=1	1	15.3	0.0254
B3DKQ5	rtn1a	Reticulon OS=Danio rerio OX=7955 GN=rtn1a PE=2 SV=1	2	14	0.00585
A7MCP4	rhoab	Ras homolog gene family, member Ab OS=Danio rerio OX=7955 GN=rhoab PE=2 SV=1	18	13	0.000908
Q0P3X9	zgc:153713	Zgc:153713 OS=Danio rerio OX=7955 GN=zgc:153713 PE=2 SV=1	2	12.5	0.0201
Q6DGI6	txn	Thioredoxin OS=Danio rerio OX=7955 GN=txn PE=1 SV=1	1	11.6	0.00921
E7F2X0	clip1a	CAP-GLY domain-containing linker protein 1a OS=Danio rerio OX=7955 GN=clip1a PE=1 SV=2	2	9.07	0.0103
D1MCG5	si:ch73-199e17.1	Tubulin alpha chain OS=Danio rerio OX=7955 GN=si:ch73-199e17.1 PE=2 SV=1	1	8.38	0.0288
P02666	CSN2	Beta-casein OS=Bos taurus GN=CSN2 PE=1 SV=2	1	7.96	0.00315
F8W3L6	myh9a	Myosin, heavy chain 9a, non-muscle (Fragment) OS=Danio rerio OX=7955 GN=myh9a PE=1 SV=1	3	7.72	0.0408
Q6DHI9	psmb2	Proteasome subunit beta type OS=Danio rerio OX=7955 GN=psmb2 PE=1 SV=1	1	7.66	0.0429
Q804G9	anxa2a	Annexin OS=Danio rerio OX=7955 GN=anxa2a PE=2 SV=1	2	7.31	0.0221
A0A0R4IGU0	cnn1b	Calponin OS=Danio rerio OX=7955 GN=cnn1b PE=1 SV=1	14	6.84	0.0123
Q6P603	anxa2a	Annexin OS=Danio rerio OX=7955 GN=anxa2a PE=1 SV=1	28	6.15	0.00121
A0A0R4IRD7	cpne1	Copine I OS=Danio rerio OX=7955 GN=cpne1 PE=1 SV=1	1	6.13	0.0156
A0A0R4ISC7	psma6b	Proteasome subunit alpha type OS=Danio rerio OX=7955 GN=psma6b PE=1 SV=1	2	6	3.44e-05
A4FUM8	atp6v1b2	ATPase H+-transporting V1 subunit B2 OS=Danio rerio OX=7955 GN=atp6v1b2 PE=1 SV=1	1	5.99	0.0273
Q6P696	glo1	Lactoylglutathione lyase OS=Danio rerio OX=7955 GN=glo1 PE=1 SV=1	4	5.71	0.0156
Q6PHD6	ilk	Integrin-linked kinase OS=Danio rerio OX=7955 GN=ilk PE=1 SV=1	1	4.78	0.00392
A0A0R4IXA9	cap2	Adenylyl cyclase-associated protein OS=Danio rerio OX=7955 GN=cap2 PE=3 SV=1	4	4.39	0.0153
A0A0R4ILB5	slmapb	Sarcolemma-associated protein b OS=Danio rerio OX=7955 GN=slmapb PE=1 SV=1	4	4.19	0.0148
A0A0R4IS33	tardbp	TAR DNA-binding protein OS=Danio rerio OX=7955 GN=tardbp PE=1 SV=1	2	3.68	0.0431
A0A0H2UKN4	utrn	Utrophin OS=Danio rerio OX=7955 GN=utrn PE=1 SV=1	7	3.67	0.0082
F1R833	nrap	Nebulin-related-anchoring protein OS=Danio rerio OX=7955 GN=nrap PE=4 SV=1	22	3.41	0.00521
A0A0R4IJ91	slmapa	Sarcolemma-associated protein a OS=Danio rerio OX=7955 GN=slmapa PE=1 SV=1	1	3.2	0.000594
A0A0R4IAJ9	add1	Adducin 1 (alpha) OS=Danio rerio OX=7955 GN=add1 PE=1 SV=1	12	3.18	0.0225
Q4KME6	gigyf2	GRB10-interacting GYF protein 2 OS=Danio rerio OX=7955 GN=gigyf2 PE=2 SV=2	3	3.16	0.035
F1Q8D2	nsfl1c	NSFL1 (p97) cofactor (p47) OS=Danio rerio OX=7955 GN=nsfl1c PE=1 SV=1	5	2.93	0.0235
Q6P7E4	pdlim7	PDZ and LIM domain protein 7 OS=Danio rerio OX=7955 GN=pdlim7 PE=2 SV=1	1	2.74	0.0495
F1QVP9	esyt1b	Extended synaptotagmin-like protein 1b OS=Danio rerio OX=7955 GN=esyt1b PE=1 SV=2	30	2.7	0.000185
Q6TH32	cfl1	Cofilin 1 OS=Danio rerio OX=7955 GN=cfl1 PE=1 SV=1	6	2.68	0.0383
F8W417	tnni1b	Troponin I type 1b (skeletal, slow) (Fragment) OS=Danio rerio OX=7955 GN=tnni1b PE=1 SV=1	5	2.57	0.0365
B0V2S9	ctnnd2b	Catenin (cadherin-associated protein), delta 2b OS=Danio rerio OX=7955 GN=ctnnd2b PE=1 SV=1	12	2.51	0.0143
A8KB60	si:ch211-114n24.6	Tubulin alpha chain (Fragment) OS=Danio rerio OX=7955 GN=si:ch211-114n24.6 PE=2 SV=1	1	2.48	0.0137
Q802V0	ldb3b	LIM domain-binding 3b OS=Danio rerio OX=7955 GN=ldb3b PE=1 SV=1	15	2.48	0.0159
A0A0R4IS57	spega	SPEG complex locus a OS=Danio rerio OX=7955 GN=spega PE=4 SV=1	2	2.46	0.0372
Q66HW2	ehd1b	EH-domain containing 1 OS=Danio rerio OX=7955 GN=ehd1b PE=1 SV=1	6	2.36	0.0242
X1WCH5	znf839	Zinc finger protein 839 OS=Danio rerio OX=7955 GN=znf839 PE=1 SV=1	1	2.27	0.00679
F1R4G2	blmh	Bleomycin hydrolase OS=Danio rerio OX=7955 GN=blmh PE=1 SV=1	1	2.22	0.0273
B8A5D4	txnl1	Thioredoxin-like 1 OS=Danio rerio OX=7955 GN=txnl1 PE=1 SV=1	3	2.14	0.0274
Q7T334	mdh2	Malate dehydrogenase OS=Danio rerio OX=7955 GN=mdh2 PE=1 SV=1	4	2.12	0.0375
Q5BKW5	rpl12	Ribosomal protein L12 OS=Danio rerio OX=7955 GN=rpl12 PE=2 SV=1	2	2.1	0.0147
Q6DC92	ralba	V-ral simian leukemia viral oncogene homolog Ba (ras-related) OS=Danio rerio OX=7955 GN=ralba PE=1 SV=1	3	2.02	0.0281
F1Q7P7	pdap1b	Pdgfa-associated protein 1b OS=Danio rerio OX=7955 GN=pdap1b PE=1 SV=1	2	2.01	0.0233
A0A286Y9E2	fam120c	Family with sequence similarity 120C OS=Danio rerio OX=7955 GN=fam120c PE=1 SV=1	8	1.99	0.0469
E7EY90	mustn1b	Musculoskeletal, embryonic nuclear protein 1b OS=Danio rerio OX=7955 GN=mustn1b PE=4 SV=1	5	1.83	0.00836
F1QNB3	ank3a	Ankyrin 3b OS=Danio rerio OX=7955 GN=ank3b PE=1 SV=2	30	1.82	0.0123
E7F4I8	ppip5k1b	Diphosphoinositol pentakisphosphate kinase 1b OS=Danio rerio OX=7955 GN=ppip5k1b PE=3 SV=2	3	1.72	0.0225
Q1L8R2	sfpq	Splicing factor proline/glutamine-rich OS=Danio rerio OX=7955 GN=sfpq PE=1 SV=1	13	1.66	9.58e-05
F1Q649	tns1b	Tensin 1b OS=Danio rerio OX=7955 GN=tns1b PE=1 SV=2	20	1.57	0.0329
Q6NYE1	fgb	Fibrinogen beta chain OS=Danio rerio OX=7955 GN=fgb PE=1 SV=1	6	1.5	0.0459
A7MCD6	prdx1	Zgc:110343 protein OS=Danio rerio OX=7955 GN=prdx1 PE=2 SV=1	3	-1.53	0.0322
A0A0R4ISM7	palm2	Paralemmin 2 OS=Danio rerio OX=7955 GN=palm2 PE=1 SV=1	24	-1.63	0.0496
A0A140LG98	sorbs1	Sorbin and SH3 domain-containing 1 (Fragment) OS=Danio rerio OX=7955 GN=sorbs1 PE=4 SV=1	2	-1.65	0.00727
E7EXT3	pygmb	Alpha-1,4 glucan phosphorylase OS=Danio rerio OX=7955 GN=pygmb PE=1 SV=1	18	-1.71	0.0265
Q6NYV3	h1f0	H1 histone family, member 0 OS=Danio rerio OX=7955 GN=h1f0 PE=1 SV=1	1	-1.73	0.00912
Q8JHI0	slc25a5	Solute carrier family 25 (mitochondrial carrier; adenine nucleotide translocator), member 5 OS=Danio rerio OX=7955 GN=slc25a5 PE=1 SV=1	19	-1.73	0.0126
Q568M0	rras2	RAS-related 2 OS=Danio rerio OX=7955 GN=rras2 PE=1 SV=1	6	-1.77	0.00881
B7ZV91	mccc1	LOC792190 protein OS=Danio rerio OX=7955 GN=mccc1 PE=2 SV=1	118	-1.79	0.00502
F1QPL7	pcca	Propionyl CoA carboxylase, alpha polypeptide (Fragment) OS=Danio rerio OX=7955 GN=pcca PE=1 SV=1	168	-1.82	0.00418
F1QSE1	myh7l	Ventricular myosin heavy chain-like OS=Danio rerio OX=7955 GN=myh7l PE=1 SV=1	153	-1.86	0.0209
A0A0R4IP09	plekha6	Pleckstrin homology domain-containing, family A member 6 OS=Danio rerio OX=7955 GN=plekha6 PE=1 SV=1	67	-1.87	0.0191
F1QM37	acacb	Acetyl-CoA carboxylase beta OS=Danio rerio OX=7955 GN=acacb PE=1 SV=2	155	-1.88	0.0124
X1WFS0	obscnb	Obscurin, cytoskeletal calmodulin and titin-interacting RhoGEF b (Fragment) OS=Danio rerio OX=7955 GN=obscnb PE=4 SV=2	1	-1.91	0.0109
Q6IQR3	actc1a	Actin, alpha, cardiac muscle 1a OS=Danio rerio OX=7955 GN=actc1a PE=2 SV=1	3	-1.91	0.0293
F1QBP1	myoz2b	Myozenin 2b OS=Danio rerio OX=7955 GN=myoz2b PE=4 SV=1	8	-1.92	0.0118
A0A0R4IP30	sorbs1	Sorbin and SH3 domain-containing 1 OS=Danio rerio OX=7955 GN=sorbs1 PE=1 SV=1	60	-1.93	0.0368
Q6PGX4	hsc70	Heat shock cognate 70 OS=Danio rerio OX=7955 GN=hsc70 PE=1 SV=1	10	-1.95	0.00268
F8W4M7	aco2	Aconitate hydratase, mitochondrial (Fragment) OS=Danio rerio OX=7955 GN=aco2 PE=1 SV=2	12	-1.97	0.00865
A0A0R4IND9	eppk1	Epiplakin 1 OS=Danio rerio OX=7955 GN=eppk1 PE=1 SV=1	2	-1.98	0.0496
Q6DRD1	atp5po	ATP synthase oligomycin sensitivity conferral protein OS=Danio rerio OX=7955 GN=atp5po PE=1 SV=1	10	-2	0.0243
Q5XFY2	aifm1	Pdcd8 protein OS=Danio rerio OX=7955 GN=aifm1 PE=2 SV=1	18	-2.02	0.0217
A0A1L1QZU5	mybpc3	Myosin-binding protein C, cardiac OS=Danio rerio OX=7955 GN=mybpc3 PE=1 SV=1	49	-2.03	0.0036
Q6NYQ7	nnt	Nicotinamide nucleotide transhydrogenase OS=Danio rerio OX=7955 GN=nnt PE=1 SV=1	10	-2.06	0.000825
Q6DGM9	ndufa7	NADH dehydrogenase (ubiquinone) 1 alpha subcomplex, 7 OS=Danio rerio OX=7955 GN=ndufa7 PE=1 SV=1	2	-2.07	0.00781
E7F4J7	prkdc	Protein kinase, DNA-activated, catalytic polypeptide OS=Danio rerio OX=7955 GN=prkdc PE=1 SV=1	2	-2.18	0.0333
Q7T368	pdhb	Pyruvate dehydrogenase (Lipoamide) beta OS=Danio rerio OX=7955 GN=pdhb PE=1 SV=1	4	-2.24	0.0327
Q6P5L8	hsdl2	Hydroxysteroid dehydrogenase-like protein 2 OS=Danio rerio OX=7955 GN=hsdl2 PE=2 SV=1	4	-2.31	0.0016
A0A0R4IJT7	hk1	Hexokinase 1 OS=Danio rerio OX=7955 GN=hk1 PE=1 SV=1	11	-2.31	0.0199
A0A0R4IYU1	fh	Fumarate hydratase, mitochondrial OS=Danio rerio OX=7955 GN=fh PE=1 SV=1	1	-2.37	7.77e-05
Q566R8	hspb2	Heat shock protein, alpha-crystallin-related, b2 OS=Danio rerio OX=7955 GN=hspb2 PE=1 SV=1	5	-2.43	0.0186
A0A0R4IHT0	slc25a12	Solute carrier family 25 (aspartate/glutamate carrier), member 12 OS=Danio rerio OX=7955 GN=slc25a12 PE=1 SV=1	9	-2.51	0.0201
F1QEJ5	uqcrq	Ubiquinol-cytochrome c reductase, complex III subunit VII OS=Danio rerio OX=7955 GN=uqcrq PE=1 SV=1	2	-2.64	0.0233
F1QUE3	uqcrc1	Ubiquinol-cytochrome c reductase core protein 1 OS=Danio rerio OX=7955 GN=uqcrc1 PE=1 SV=1	4	-2.68	0.0194
E9QDE7	nnt2	Nicotinamide nucleotide transhydrogenase 2 (Fragment) OS=Danio rerio OX=7955 GN=nnt2 PE=1 SV=1	7	-2.85	9.51e-05
Q71N41	gamt	Guanidinoacetate N-methyltransferase OS=Danio rerio OX=7955 GN=gamt PE=2 SV=2; Duplicate proteins: A8E5I0|A8E5I0_DANRE	1	-2.86	0.0401
Q6PBI0	sucla2	Succinate--CoA ligase [ADP-forming] subunit beta, mitochondrial OS=Danio rerio OX=7955 GN=sucla2 PE=1 SV=1	3	-2.86	0.0416
Q6DGU9	gstk1	Glutathione S-transferase kappa OS=Danio rerio OX=7955 GN=gstk1 PE=1 SV=1	2	-2.96	0.0132
B8A5F7	DKEY-276L17.3-004	Novel protein similar to vertebrate sorbin and SH3 domain containing 2 (SORBS2) (Fragment) OS=Danio rerio OX=7955 GN=DKEY-276L17.3-004 PE=4 SV=1	1	-3.17	0.0345
B3DGZ9	pcxb	Pyruvate carboxylase OS=Danio rerio OX=7955 GN=pcxb PE=2 SV=1	1	-3.21	0.0102
B8JIS1	atp5pb	ATP synthase, H+ transporting, mitochondrial Fo complex, subunit B1 OS=Danio rerio OX=7955 GN=atp5pb PE=1 SV=1	3	-3.25	0.00164
A5PF53	arhgap35b	Rho GTPase-activating protein 35b OS=Danio rerio OX=7955 GN=arhgap35b PE=4 SV=1	2	-3.29	0.0371
A0A0R4IDK6	nap1l1	Nucleosome assembly protein 1-like 1 OS=Danio rerio OX=7955 GN=nap1l1 PE=1 SV=1	4	-3.46	0.00888
Q7ZZ04	echs1	Enoyl CoA hydratase, short chain, 1, mitochondrial OS=Danio rerio OX=7955 GN=echs1 PE=1 SV=1	4	-3.64	0.0112
A2CG95	acadm	Acyl-CoA dehydrogenase medium chain OS=Danio rerio OX=7955 GN=acadm PE=1 SV=1	2	-3.66	0.0162
F1Q9P7	si:ch1073-221c23.2	Si:ch1073-221c23.2 (Fragment) OS=Danio rerio OX=7955 GN=si:ch1073-221c23.2 PE=1 SV=1	1	-3.81	0.0286
E9QFJ1	pfkpb	ATP-dependent 6-phosphofructokinase OS=Danio rerio OX=7955 GN=pfkpb PE=1 SV=1	1	-4.01	0.00931
F1QV31	krt5	Keratin 5 OS=Danio rerio OX=7955 GN=krt5 PE=1 SV=1	2	-4.51	0.00204
A0A0R4IV39	ctnnd1	Catenin (cadherin-associated protein), delta 1 OS=Danio rerio OX=7955 GN=ctnnd1 PE=1 SV=1	7	-4.59	0.00116
Q66I77	cox6a2	Cytochrome c oxidase subunit 6A, mitochondrial OS=Danio rerio OX=7955 GN=cox6a2 PE=1 SV=1	1	-5.78	0.0135
Q4VBU0	bckdha	2-oxoisovalerate dehydrogenase subunit alpha OS=Danio rerio OX=7955 GN=bckdha PE=1 SV=1	1	-5.8	0.00839
A0A0R4INC0	eml1	Echinoderm microtubule-associated protein-like 1 OS=Danio rerio OX=7955 GN=eml1 PE=4 SV=1	4	-6.46	0.000925
A0A0H2UKE5	pym1	Partner of Y14 and mago OS=Danio rerio OX=7955 GN=pym1 PE=1 SV=1	1	-11.5	0.0238
A0A0R4IGX4	tnni4a	Troponin I4a OS=Danio rerio OX=7955 GN=tnni4a PE=1 SV=1	2	-54	4.44e-05
