# Supplementary material for: In vivo proximity labeling identifies cardiomyocyte protein networks during zebrafish heart regeneration
Source: eLife. 2021 Mar 25;10:e66079. doi: 10.7554/eLife.66079 (PMC8034980; doi:10.7554/eLife.66079)
Supplement: Supplementary file 5. — Association of ErbB2 after injury is color coded as in Figure 3, with yellow denoting increased association with ErbB2, green denoting no change in association, and blue denoting decreased association. [file elife-66079-supp5.xlsx]

## Sheet: Sheet1
Supplementary File 5: ErbB2 associated proteins represented in published transcriptome and epigenome datasets
	Injury	Gene name	Fold change (log2)					Injury	Gene name	Fold change (log2)			increased association with ErbB2
RNA-seq							Proteomics						decreased association with ErbB2
Kang et al., 2016	14 dpi	tns1b	0.755971				Wang et al., 2013	7 dpi	tns1b	N/A			association unchanged
		hspb2	-1.32533						hspb2	N/A
		gapdh	-2.48695						gapdh	-0.748516
		acta1b	N/A						acta1b	N/A
		ezrb	0.490335						ezrb	N/A
		ctnnd1	N/A						ctnnd1	N/A
		scrib	N/A						scrib	N/A
		anxa2a	N/A						anxa2a	N/A
		rhoA-b	N/A						rhoA-b	N/A
Ben-Yair et al., 2019	5 dpa	tns1b	-1.09535				Ma et al., 2018	3, 7 and 14 dpa	tns1b	2.21479
		hspb2	-0.969803						hspb2	N/A
		gapdh	-1.12818						gapdh	N/A
		acta1b	N/A						acta1b	N/A
		ezrb	-0.986835						ezrb	N/A
		ctnnd1	N/A						ctnnd1	N/A
		scrib	-0.626022						scrib	1.31199
		anxa2a	1.8625						anxa2a	1.95397
		rhoA-b	N/A						rhoA-b	N/A
Cardiomyocyte H3.3 ChIP-seq
Goldman et al., 2017	14 dpi	tns1b	N/A				BioID2 BirA2-GFP	14 dpi	tns1b	3.21
		hspb2	-1.23706						hspb2	-3.2
		gapdh	-1.5138						gapdh	1.41
		acta1b	N/A						acta1b	N/A
		ezrb	0.678537						ezrb	N/A
		ctnnd1	N/A						ctnnd1	2.2
		scrib	-0.519642						scrib	90.9
		anxa2a	1.66508						anxa2a	20.5
		rhoA-b	1.14						rhoA-b	N/A
