# Supplementary material for: In vivo proximity labeling identifies cardiomyocyte protein networks during zebrafish heart regeneration
Source: eLife. 2021 Mar 25;10:e66079. doi: 10.7554/eLife.66079 (PMC8034980; doi:10.7554/eLife.66079)
Supplement: Supplementary file 6. — For Nrg1 experiments, normalized RNA-seq read counts are shown. [file elife-66079-supp6.xlsx]

## Sheet: Sheet1
Supplementary File 6: rhoa gene expression levels represented in published transcriptome and epigenome datasets.
	Injury	Gene name	FoldChange (log2)
RNA-seq
Wu et al., 2016	7 dpci (border zone)	rhoaa	0.964982
		rhoab	-0.338062
		rhoac	0.879383
Kang et al., 2016	14 dpi	rhoaa	N/A
		rhoab	N/A
		rhoac	N/A
Ben-Yair et al., 2019	5 dpa	rhoaa	N/A
		rhoab	N/A
		rhoac	N/A
ChIP-seq
Goldman et al., 2017	14 dpi	rhoaa	1.1
		rhoab	1.14
		rhoac	N/A
scRNA-seq		Gene cluster	rhoaa (average raw reads)	rhoab (average raw reads)	rhoac (average raw reads)
Honkoop et al., 2019	7 dpi	Cardiomyocytes	2.10987	0.750092	N/A
	Average	Endothelial cells	2.94272	1.01691	N/A
		Fibroblasts	5.40467	0	N/A
		Immune cells	5.00363	0	N/A
	Cardiac mitogen	Gene name	Average base reads unjured	Average base reads 7 dpt	FoldChange (log2)	pval
RNA-seq, Nrg1 overexpression	7 dpt Nrg1-OE	rhoaa	5246.08	8750.25	0.738085	0.0392543
		rhoab	3359.73	3310.68	-0.0212184	0.98339
		rhoac	2995.69	2196.11	-0.44794	0.220261
