# Supplementary material for: In vivo proximity labeling identifies cardiomyocyte protein networks during zebrafish heart regeneration
Source: eLife. 2021 Mar 25;10:e66079. doi: 10.7554/eLife.66079 (PMC8034980; doi:10.7554/eLife.66079)
Supplement: Supplementary file 7. [file elife-66079-supp7.xlsx]

## Sheet: T3 - Raw & Norm
Supplementary File 7: Raw data from BioID2 assays used to generate Supplementary File 1-3.
Accession	Description	Gene name	TotalPeptide	39973 control	39974 control	39975 control	39976 14d	39977 14d	39978 14d	39979 CAAX Control	39980 CAAX Control	39981 CAAX Control	39982 CAAX 14d	39983 CAAX 14d	39984 CAAX 14d	39984 QC Pool	39984 QC Pool	39984 QC Pool	39973 control Normalized	39974 control Normalized	39975 control Normalized	39976 14d Normalized	39977 14d Normalized	39978 14d Normalized	14d/control (log10)	14d/control (log10)	14d/control (log10)	39979 CAAX Control Normalized	39980 CAAX Control Normalized	39981 CAAX Control Normalized	39982 CAAX 14d Normalized	39983 CAAX 14d Normalized	39984 CAAX 14d Normalized	CAAX14d/CAAXcontrol (log10)	CAAX14d/CAAXcontrol (log10)	CAAX14d/CAAXcontrol (log10)	39984 QC Pool Normalized	39984 QC Pool Normalized	39984 QC Pool Normalized	control_CV	14d_CV	CAAX Control_CV	CAAX 14d_CV	QC Pool_CV	14d_control_FC	14d_control_pval	CAAX 14d_CAAX Control_FC	CAAX 14d_CAAX Control_pval	CAAX Control_control_FC
A7YT47	Hadha protein OS=Danio rerio OX=7955 GN=hadhaa PE=1 SV=1	hadhaa	5	613608	1.54e+06	1.32705e+06	797642	1.41154e+06	0	3920719	17702847	1.87426e+07	937560	9.97405e+06	0	5.01763e+06	5.48435e+06	4963901	3.14803e+06	3.68198e+06	2.80596e+06	2.25321e+06	3.16689e+06	4.54276e+06	-0.145238	-0.0654476	0.209238	8.57477e+06	1.17491e+07	8.69594e+06	4.07969e+06	7.78027e+06	2.32412e+06	-0.322595	-0.179011	-0.573059	5.19597e+06	5.99932e+06	7.52141e+06	13.7	34.7	18.6	58.9	18.9	1.03	0.996	-2.05	0.133	3.01
F1QCP1	Proline-rich coiled-coil 2C OS=Danio rerio OX=7955 GN=prrc2c PE=1 SV=1	prrc2c	2	1.6707e+06	3.25573e+06	2.94558e+06	3.56034e+06	386774	2.98483e+06	0	0	0	0	0	0	0	0	0	3.53712e+06	3.30771e+06	2.70012e+06	5.40002e+06	1.91679e+06	3.07282e+06	0.183746	-0.236953	0.0561537	1.30971e+06	1.59084e+06	543667	304048	1.63463e+06	2.10893e+06	-0.634234	0.0117942	0.588729	572972	954366	874816	13.6	51.2	47.2	69.4	25.1	1.09	0.995	1.18	0.972	-2.77
Q05AK9	Translation machinery-associated protein 7 OS=Danio rerio OX=7955 GN=tma7 PE=3 SV=1	tma7	1	0	0	0	0	0	8.9989e+06	6013592	13460047	0	4.2818e+06	13015537	0	0	7213141	6.75699e+06	419834	216317	1.1137e+06	1.15349e+06	463206	192150	0.438936	0.330684	-0.763129	5.68518e+06	8.42909e+06	9.85107e+06	6.10454e+06	9.41105e+06	6.01467e+06	0.0309089	0.0478574	-0.214272	9.73721e+06	7.24953e+06	7.34843e+06	80.7	82.2	26.5	27	17.4	1.03	0.995	-1.11	0.661	13.7
Q5I0F6	Prkar1a protein OS=Danio rerio OX=7955 GN=prkar1aa PE=1 SV=1	prkar1aa	1	735695	561930	1.18673e+06	0	2.80428e+06	0	1.81252e+06	4088515	3.76656e+06	1.10569e+06	3.06795e+06	0	1.1475e+06	1.4227e+06	1696861	791277	570225	1.08957e+06	561946	3.20215e+06	283182	-0.148634	0.749395	-0.585188	1.72094e+06	2.64883e+06	2.30782e+06	1.52757e+06	2.28269e+06	4.05238e+06	-0.0517643	-0.064607	0.244507	1.05685e+06	1.42914e+06	1.83183e+06	31.9	119	21.1	49.4	26.9	1.65	0.989	1.18	0.774	2.72
E7FE33	FERM, RhoGEF and pleckstrin domain protein 2 OS=Danio rerio OX=7955 GN=farp2 PE=4 SV=1	farp2	11	2.07555e+06	0	2.58406e+07	0	6.09762e+07	1.88395e+06	8.4083e+07	1.42454e+08	1.08437e+08	2.37686e+07	8.79631e+07	0	4.10351e+07	3.41942e+07	32487319	7.09626e+06	8.96627e+06	1.60269e+07	8.47235e+06	1.75542e+07	6.97333e+06	0.0769743	0.291769	-0.361408	8.00414e+07	8.48428e+07	7.40477e+07	3.5528e+07	5.61756e+07	6.47407e+07	-0.352744	-0.179068	-0.0583341	4.27468e+07	3.49907e+07	4.40842e+07	44	52	6.79	28.8	12.1	1.03	0.989	-1.53	0.124	7.45
Q2THW0	Palmitoyltransferase OS=Danio rerio OX=7955 GN=zdhhc5a PE=2 SV=1	zdhhc5a	1	0	0	0	0	1127233	0	1.26281e+06	1.51264e+06	1.73943e+06	0	1449469	0	0	430342	0	832323	457321	298405	238662	1.27672e+06	386029	-0.542508	0.445876	0.111813	1.20057e+06	1.00818e+06	1.09274e+06	354571	1.0946e+06	174436	-0.529683	0.0357161	-0.796884	239286	432125	205581	51.8	88.6	8.76	90.1	41.8	1.2	0.985	-2.03	0.204	2.08
F1QI68	5'-nucleotidase, cytosolic IB b OS=Danio rerio OX=7955 GN=nt5c1bb PE=4 SV=1	nt5c1bb	6	6.18072e+07	2.48219e+07	2.51877e+07	19710650	7000444	56973973	0	5800060	6.21428e+06	5.32709e+06	0	2.69009e+07	1.15495e+07	2.0477e+07	1.35594e+07	6.8835e+07	2.58694e+07	1.70107e+07	4.65116e+07	1.51423e+07	4.45853e+07	-0.170248	-0.232594	0.418469	5.13392e+06	5.833e+06	5.27096e+06	8.8856e+06	3.80475e+06	1.73481e+07	0.238237	-0.185566	0.517362	1.7659e+07	2.09276e+07	1.51922e+07	74.4	49.6	6.84	68.3	16	-1.05	0.984	1.85	0.424	-6.88
F1QZQ3	Plexin b1a (Fragment) OS=Danio rerio OX=7955 GN=plxnb1a PE=1 SV=1	plxnb1a	2	0	0	0	0	3.98447e+06	0	6.4822e+06	5.56649e+06	5.30858e+06	779195	7.7359e+06	0	853021	0	595391	546739	982620	1.13786e+06	380772	4.53649e+06	331886	-0.157114	0.664334	-0.535102	6.13589e+06	3.62777e+06	3.27861e+06	2.17337e+06	5.69506e+06	1.39742e+06	-0.450743	0.195858	-0.370361	1.34336e+06	1.38373e+06	994189	34.5	138	35.9	74.2	17.3	1.97	0.983	-1.41	0.376	4.89
A0A0G2KFG6	Coiled-coil domain containing 69 OS=Danio rerio OX=7955 PE=4 SV=1	A0A0G2KFG6	1	0	0	0	0	0	337164	392284	1.65882e+06	1.0491e+06	0	0	0	0	0	0	444839	215217	371903	638751	155652	345986	0.157129	-0.140722	-0.031371	374521	1.10271e+06	669935	1.10535e+06	1.05144e+06	147122	0.470024	-0.020676	-0.658355	627659	680127	770327	34.1	64	51.2	70.1	10.4	1.11	0.982	1.07	0.842	2.08
F1Q8D2	NSFL1 (p97) cofactor (p47) OS=Danio rerio OX=7955 GN=nsfl1c PE=1 SV=1	nsfl1c	5	20280739	29760625	1.82313e+07	1.53018e+07	1.11171e+07	3.90184e+07	0	4.70557e+06	11617715	6.59911e+06	2.18052e+07	1.16465e+07	1.19764e+07	1.35203e+07	2.17045e+07	2.35407e+07	3.17247e+07	2.85047e+07	2.5025e+07	2.07716e+07	4.03078e+07	0.0265545	-0.183927	0.150473	5.28859e+06	4.23608e+06	8.3186e+06	1.05117e+07	2.72288e+07	2.82978e+07	0.298333	0.808064	0.531703	1.48955e+07	1.40917e+07	2.41346e+07	14.8	35.8	35.6	45.3	31.5	1.03	0.982	3.7	0.0392	-4.69
A2CEX1	Palmitoyltransferase OS=Danio rerio OX=7955 GN=zdhhc8b PE=3 SV=1; Duplicate proteins: Q8AYN4|Q8AYN4_DANRE	zdhhc8b	2	9284283	1.83694e+06	0	0	3.43614e+06	0	772333	1.52594e+06	1.63992e+06	1.09051e+06	2.8503e+06	0	0	677476	523446	1.00978e+06	2.39243e+06	1.52065e+06	538221	3.90683e+06	1.64863e+06	-0.273265	0.212985	0.0350945	1.01558e+06	2.22814e+06	1.20709e+06	1.48463e+06	2.15304e+06	655320	0.164904	-0.0148897	-0.265286	1.38061e+06	1.54067e+06	1.15658e+06	42.6	84.5	43.9	52.4	14.2	1.24	0.977	-1.04	0.846	-1.11
D2CKK9	Glutathione peroxidase OS=Danio rerio OX=7955 GN=gpx4a PE=2 SV=1	gpx4a	2	882163	1.06789e+06	1.78293e+06	0	3.8844e+06	0	2.9579e+06	23759732	23019520	3403751	8.48651e+06	1.55498e+06	3.79549e+06	3.02823e+06	3.19637e+06	1.5462e+06	1.29879e+06	2.10445e+06	685258	5.59112e+06	1.03203e+06	-0.353411	0.633959	-0.309447	1.484e+07	1.49245e+07	1.35968e+07	5.33788e+06	6.63444e+06	2.83783e+06	-0.444064	-0.352096	-0.68045	3.9903e+06	3.2357e+06	4.26109e+06	25	112	5.14	39.1	13.9	1.48	0.976	-2.93	0.0452	8.76
A2ASQ4	Sperm antigen with calponin homology and coiled-coil domains 1 OS=Danio rerio OX=7955 GN=specc1 PE=4 SV=1	specc1	5	9.67828e+07	8.14916e+07	3.59682e+07	122304561	36643511	63889523	9.08061e+07	1.17246e+08	1.06953e+08	5.03398e+07	9.29387e+07	101946379	1.37631e+08	7.17586e+07	5.91317e+07	1.06891e+08	8.41244e+07	5.64461e+07	2.0902e+08	3.74569e+07	6.8528e+07	0.291244	-0.351391	0.0842342	8.53376e+07	7.13072e+07	6.06975e+07	7.4283e+07	6.61472e+07	1.76076e+08	-0.060251	-0.0326217	0.46253	1.24382e+08	7.24749e+07	6.50112e+07	30.6	87.1	17.1	58.1	37	1.27	0.975	1.46	0.46	-1.14
F1R2E5	Oxysterol-binding protein OS=Danio rerio OX=7955 GN=osbpl3b PE=3 SV=2	osbpl3b	3	0	0	0	0	4.40957e+06	971250	639782	3.17049e+06	6.42736e+06	1179066	7470188	1.81216e+06	1.41751e+06	1.67182e+06	2.34115e+06	1.9535e+06	1.78602e+06	1.3461e+06	638949	5.11376e+06	1.3426e+06	-0.485348	0.456853	-0.00113143	2.06809e+06	2.25371e+06	4.00714e+06	2.91304e+06	5.58035e+06	2.69806e+06	0.148777	0.393763	-0.171783	2.70941e+06	3.61231e+06	2.92401e+06	18.5	102	38.5	43	15.3	1.4	0.974	1.34	0.411	1.64
Q6PBK3	40S ribosomal protein S28 OS=Danio rerio OX=7955 GN=rps28 PE=3 SV=1	rps28	1	13964346	13904359	21620300	15312582	6.80128e+06	20285946	9320280	14293720	16595268	6135407	22097538	23414706	16423468	14246239	15195548	1.52596e+07	1.41598e+07	1.95014e+07	2.46458e+07	7.82798e+06	2.09906e+07	0.2082	-0.257407	0.0319577	8.7974e+06	8.93584e+06	9.69183e+06	8.8206e+06	1.58114e+07	3.61139e+07	0.0011436	0.247834	0.571269	1.48905e+07	1.43212e+07	1.65972e+07	17.3	49.6	5.27	70	7.76	1.09	0.974	2.21	0.263	-1.78
B0JZK4	Acot9 protein OS=Danio rerio OX=7955 GN=acot9.1 PE=2 SV=1	acot9.1	2	0	850631	878697	0	6.55768e+06	548960	1.63911e+06	2.83029e+06	6.24981e+06	899475	2.0594e+06	854496	857799	860191	1661039	1.22849e+06	1.76663e+06	1.12476e+06	2.21778e+06	965300	1.10033e+06	0.256545	-0.262484	-0.00953881	2.51982e+06	1.95876e+06	3.8508e+06	1.42946e+06	1.67311e+06	1.48606e+06	-0.246197	-0.0684576	-0.413514	1.67959e+06	1.53435e+06	1.99767e+06	25.1	48.1	35	8.34	13.6	1.04	0.97	-1.82	0.098	2.02
B3DI32	Vcl protein OS=Danio rerio OX=7955 GN=vcla PE=1 SV=1	vcla	1	3.97162e+06	7.43792e+06	6.16437e+06	2.01931e+06	1.23761e+07	4301348	4736130	1.96271e+07	20590656	3.12626e+06	2.76326e+07	3.62383e+06	1.11208e+07	9.95623e+06	8.74346e+06	4.31069e+06	7.56932e+06	5.60302e+06	3.0661e+06	1.43207e+07	4.43677e+06	-0.14796	0.276908	-0.101355	4.48133e+06	1.21596e+07	1.19416e+07	4.42465e+06	1.96846e+07	5.32919e+06	-0.00552786	0.209207	-0.3504	1.0106e+07	1.00075e+07	9.52185e+06	28.2	84.4	45.9	87.2	3.17	1.25	0.969	1.03	0.855	1.63
A2RUY5	Ubiquitin-associated protein 2b OS=Danio rerio OX=7955 GN=ubap2b PE=1 SV=1	ubap2b	3	2.97477e+06	1.44698e+07	4.35669e+06	2.58679e+06	329643	5.79585e+06	0	3669380	0	0	0	5.47431e+06	3.37606e+06	3.96281e+06	3.8851e+06	3.37439e+06	6.78244e+06	4.79617e+06	4.48086e+06	3.79809e+06	6.23707e+06	0.123166	-0.251821	0.114085	672339	3.23145e+06	660550	2.10733e+06	654264	1.16255e+06	0.496143	-0.693645	0.245505	3.339e+06	4.55757e+06	4.93438e+06	34.3	26	97.3	56.4	19.5	-1.03	0.966	-1.16	0.956	-3.28
Q7ZUP6	Isocitrate dehydrogenase [NADP] OS=Danio rerio OX=7955 GN=idh2 PE=2 SV=1	idh2	18	4.44425e+08	4.75902e+08	4.48184e+08	2.61178e+08	6.22124e+08	3.23267e+08	6.52186e+08	1229392775	1.32655e+09	3.78598e+08	8.00478e+08	2.63262e+08	6.44239e+08	5.72468e+08	5.19155e+08	4.8954e+08	4.866e+08	4.25213e+08	4.25055e+08	6.87663e+08	3.35309e+08	-0.0613432	0.150204	-0.103162	6.16522e+08	7.29636e+08	7.31832e+08	5.64932e+08	5.62692e+08	4.34082e+08	-0.0379522	-0.112836	-0.226839	5.96934e+08	5.76947e+08	5.71747e+08	7.78	37.9	9.52	14.4	2.29	1.03	0.964	-1.33	0.0588	1.48
E7F2L1	AP2-associated kinase 1b OS=Danio rerio OX=7955 GN=aak1b PE=1 SV=1	aak1b	2	0	0	0	0	0	8.59624e+06	0	0	0	0	0	0	0	0	0	1.05734e+06	1.43065e+06	653585	230069	1.20244e+06	4.08101e+06	-0.662354	-0.0754715	0.795465	510870	1.97961e+06	1.04362e+06	958256	1.53753e+06	623159	0.273171	-0.109756	-0.223942	721278	867221	537573	37.1	109	63.1	44.5	23.3	1.76	0.963	-1.13	0.927	1.12
A0A0R4IDF6	Neurobeachin-like 1 OS=Danio rerio OX=7955 GN=nbeal1 PE=1 SV=1	nbeal1	1	0	0	0	0	1.48405e+06	0	0	0	0	0	0	0	1.74336e+06	0	0	359580	677306	351718	264924	1.68499e+06	215154	-0.132675	0.395814	-0.213446	120589	606629	185537	189539	137028	277453	0.196393	-0.646115	0.17476	1.60168e+06	353321	1.01125e+06	40.1	116	86.7	35.2	63.2	1.56	0.96	-1.51	0.717	-1.52
Q6P3L3	Heat shock protein 5 OS=Danio rerio OX=7955 GN=hspa5 PE=1 SV=1	hspa5	4	1.19647e+07	3.95701e+06	3.13458e+07	1.83006e+06	1.41069e+07	1.89034e+07	1.59822e+07	3.42924e+07	46928462	1.63847e+07	4.27732e+07	5.93433e+06	2.09028e+07	29220898	24473646	1.36358e+07	1.05886e+07	2.87858e+07	1.39243e+07	1.61465e+07	1.95054e+07	0.00909424	0.183239	-0.169023	1.60592e+07	2.15493e+07	1.0588e+07	2.33707e+07	3.0992e+07	4.75472e+07	0.162947	0.157816	0.65231	3.04406e+07	2.93694e+07	2.6616e+07	55.2	17	34.1	36.4	6.85	-1.07	0.959	2.11	0.0626	-1.1
B3DGP9	Protein tyrosine kinase 2.2 OS=Danio rerio OX=7955 GN=ptk2aa PE=2 SV=1	ptk2aa	2	0	0	0	0	1.01648e+07	0	0	2.03666e+06	0	3.60851e+06	7.97618e+06	0	0	5281286	0	540293	556023	855256	213818	819690	1.32687e+06	-0.402586	0.168557	0.190731	1.2669e+06	2.37632e+06	551085	5.04499e+06	5.90067e+06	3.34138e+06	0.600116	0.394997	0.782707	692755	5.60386e+06	739347	27.3	70.8	65.8	27.4	120	1.21	0.958	3.41	0.0686	2.15
Q803Q7	Fructose-bisphosphate aldolase OS=Danio rerio OX=7955 GN=aldoaa PE=1 SV=1	aldoaa	12	2.30789e+08	344022104	2.35841e+08	1.71704e+08	86267173	4.48867e+08	1.46698e+08	1.08071e+08	129112980	4.82464e+07	71874398	1.738e+08	2.48959e+08	1.45315e+08	1.68799e+08	2.53862e+08	3.5143e+08	2.13321e+08	3.076e+08	1.28634e+08	4.48809e+08	0.0833887	-0.436484	0.323027	1.47013e+08	7.75406e+07	7.03491e+07	7.06546e+07	1.16233e+08	2.19107e+08	-0.318216	0.175802	0.493398	2.2511e+08	1.86976e+08	1.89736e+08	26	54.4	43.1	56.2	10.6	1.08	0.958	1.38	0.542	-2.78
A0A0R4I9A8	Heat shock protein beta-11 OS=Danio rerio OX=7955 GN=hspb11 PE=1 SV=1	hspb11	6	1.22976e+08	1.0193e+08	9.01126e+07	4.55709e+07	1.17229e+08	6.29681e+07	1.40004e+08	2.84231e+08	245847885	6.7548e+07	1.777e+08	6.30207e+07	1.61193e+08	1.18987e+08	1.13505e+08	1.36097e+08	1.0866e+08	8.14797e+07	1.27915e+08	1.37543e+08	6.53087e+07	-0.0269285	0.102368	-0.0960783	1.35552e+08	1.70203e+08	1.37313e+08	1.00428e+08	1.13199e+08	9.80502e+07	-0.13025	-0.177125	-0.146264	1.49492e+08	1.19909e+08	1.2541e+08	25.1	35.6	13.2	7.84	12	1.01	0.958	-1.42	0.023	1.36
A0A0R4IAJ9	Adducin 1 (alpha) OS=Danio rerio OX=7955 GN=add1 PE=1 SV=1	add1	33	1.22285e+08	1.57578e+08	1.54109e+08	4.10361e+07	9.2294e+08	6.47541e+07	1.48825e+09	2.54795e+09	2.41921e+09	3.80434e+08	1.31919e+09	5.45792e+07	8.3686e+08	7.57157e+08	701848589	1.53964e+08	1.69305e+08	1.39893e+08	8.95452e+07	5.96747e+08	7.72186e+07	-0.235377	0.54712	-0.258073	1.40321e+09	1.50365e+09	1.32478e+09	5.62344e+08	9.16828e+08	6.70116e+08	-0.397119	-0.21486	-0.295994	7.57591e+08	7.54656e+08	7.72832e+08	9.53	116	6.36	25.4	1.28	1.65	0.956	-1.97	0.033	9.14
Q6PBY0	Guanine nucleotide-binding protein subunit beta-5b OS=Danio rerio OX=7955 GN=gnb5b PE=2 SV=1	gnb5b	1	0	0	0	0	1.60458e+06	0	2428661	0	3.50385e+06	2.05036e+06	2.22363e+06	0	0	0	0	566817	710943	658483	324689	1.82312e+06	401967	-0.241976	0.40898	-0.214354	2.30353e+06	3.25258e+06	2.15188e+06	2.87361e+06	1.66505e+06	3.27662e+06	0.0960348	-0.290799	0.182608	586841	195243	267709	11.3	99.3	23.2	32.2	59.5	1.32	0.953	1.01	0.972	3.98
Q5PZ43	Xin actin-binding repeat-containing protein 1 OS=Danio rerio OX=7955 GN=xirp1 PE=1 SV=1	xirp1	77	1.44477e+09	2.02061e+09	2.07604e+09	1.76038e+09	4.7605e+08	2.62748e+09	4.13689e+08	6.2139e+08	1.08818e+09	2.34372e+08	8.40428e+08	2.04598e+09	1.73024e+09	1.4033e+09	1.09049e+09	1.64939e+09	2.02877e+09	1.88449e+09	2.97343e+09	8.62174e+08	2.67477e+09	0.255934	-0.371637	0.152093	4.79581e+08	3.96853e+08	6.28711e+08	4.23718e+08	6.58762e+08	3.02397e+09	-0.0537851	0.220099	0.682126	1.57545e+09	1.41403e+09	1.24431e+09	10.3	52.6	23.4	105	11.7	1.17	0.951	2.73	0.389	-3.7
F1Q9P7	Si:ch1073-221c23.2 (Fragment) OS=Danio rerio OX=7955 GN=si:ch1073-221c23.2 PE=1 SV=1	si:ch1073-221c23.2	1	1.55548e+06	0	3.53442e+06	1.50732e+06	1.50768e+06	2.69485e+06	4297553	10409817	7.60561e+06	1.53728e+06	5496006	0	4.47563e+06	4.6715e+06	2633210	1.67977e+06	1.89798e+06	3.22349e+06	2.26954e+06	1.71207e+06	2.77706e+06	0.130688	-0.0447697	-0.0647413	4.06777e+06	6.56688e+06	4.55531e+06	2.14016e+06	4.04235e+06	4.95655e+06	-0.27891	-0.210725	0.0366619	4.08911e+06	4.69442e+06	2.84933e+06	36.9	23.6	26.2	38.7	24.3	-1.01	0.951	-1.36	0.314	2.23
E7FDX6	Low density lipoprotein receptor class A domain-containing 4b OS=Danio rerio OX=7955 GN=ldlrad4b PE=4 SV=1	ldlrad4b	1	0	0	0	0	2387556	0	0	0	0	597005	0	0	0	0	0	281683	280335	1.01684e+06	237117	2.72239e+06	99819.3	-0.074799	0.987272	-1.00804	835572	119765	121510	813076	761487	270366	-0.0118528	0.803332	0.347339	759915	659125	237425	80.7	145	115	48.7	50.2	1.94	0.95	1.71	0.318	-1.47
Q6PFU4	Cell division cycle 42 OS=Danio rerio OX=7955 GN=cdc42 PE=1 SV=1	cdc42	2	0	552682	1.88176e+06	0	3.89519e+06	0	5.6877e+06	5.48713e+06	1.28387e+07	3852694	1.61284e+07	0	3.94818e+06	3.88051e+06	1638011	1.6026e+06	808819	1.73004e+06	322428	4.43459e+06	1.3298e+06	-0.696393	0.739001	-0.114269	5.39142e+06	3.58594e+06	7.71431e+06	5.39784e+06	1.17632e+07	2.69678e+07	0.000516648	0.515921	0.543549	3.6245e+06	3.89846e+06	3.56707e+06	36.2	106	37.2	75.3	4.79	1.47	0.95	2.64	0.216	4.03
Q803J2	Ube2n protein OS=Danio rerio OX=7955 GN=ube2na PE=1 SV=1	ube2na	1	0	0	0	0	2.87929e+06	0	0	3.63424e+06	5.34344e+06	1.6119e+06	4.08093e+06	0	0	0	0	208955	778204	884463	130567	3.28858e+06	267215	-0.20422	0.625914	-0.519819	6.95068e+06	2.36244e+06	3.23716e+06	2.24651e+06	3.0193e+06	1.57838e+06	-0.490518	0.106545	-0.311953	298276	476246	666051	58.2	145	58.2	31.6	38.3	1.97	0.949	-1.83	0.24	6.71
Q6JAN2	Fibronectin 3 OS=Danio rerio OX=7955 GN=fn1b PE=2 SV=1	fn1b	1	0	0	0	0	10618122	0	0	0	8.99799e+06	0	0	0	0	0	0	496851	293105	1.12218e+06	794202	944823	190294	0.203705	0.508327	-0.770637	226104	317740	740127	631246	225290	181039	0.44589	-0.14933	-0.611534	213963	299196	658370	67.8	62.1	64.1	71.7	60.4	1.01	0.948	-1.24	0.668	-1.49
A0A0R4IRI0	Natriuretic peptide receptor 3 OS=Danio rerio OX=7955 GN=npr3 PE=1 SV=1	npr3	1	0	0	0	0	0	0	0	2.2942e+06	0	0	0	0	0	0	0	269451	390835	293950	477274	83484.5	670054	0.248289	-0.670387	0.357836	162045	1.51104e+06	381239	267622	690623	126792	0.217885	-0.340034	-0.478106	439488	371119	305014	20.2	72.9	106	81.1	18.1	1.29	0.946	-1.89	0.604	2.15
Q5U3E4	SGT1 homolog, MIS12 kinetochore complex assembly cochaperone OS=Danio rerio OX=7955 GN=sugt1 PE=1 SV=1	sugt1	11	1.12271e+08	9.67593e+07	7.21754e+07	6.64007e+07	5.52306e+07	1.30031e+08	2.37658e+07	1.79269e+07	2.2687e+07	3.78273e+07	1.71434e+07	8.44346e+07	7.50689e+07	6.94642e+07	7.07164e+07	1.24283e+08	9.89655e+07	1.17235e+08	1.07275e+08	1.02397e+08	1.34451e+08	-0.0639114	0.0148044	0.0595072	2.53549e+07	2.33828e+07	1.66867e+07	2.99227e+07	4.20122e+07	1.00675e+08	0.0719388	0.254479	0.780552	7.24192e+07	8.3621e+07	8.21568e+07	11.5	15.1	20.8	65.8	7.67	1.01	0.945	2.64	0.131	-5.2
A7M795	Ryanodine receptor 2b (Fragment) OS=Danio rerio OX=7955 GN=ryr2b PE=2 SV=1	ryr2b	1	0	0	0	0	12399262	0	0	0	0	0	0	0	0	0	703178	277214	163270	747045	1.07891e+06	180863	144889	0.590172	0.0444421	-0.712312	349069	126387	288088	325044	495859	237780	-0.0309691	0.593655	-0.0833513	406230	324758	755549	78.2	113	45.2	37.2	46.2	1.18	0.943	1.39	0.392	-1.56
Q6IQX1	Myosin, heavy polypeptide 2, fast muscle-specific OS=Danio rerio OX=7955 GN=myhz2 PE=1 SV=1	myhz2	19	9.21304e+06	3.69471e+08	15612762	4081127	2.39368e+07	2.57298e+08	1.71633e+07	24477920	4.62651e+07	2.43101e+06	1.19969e+07	1.95082e+07	4.83669e+07	5.05204e+07	3.87056e+07	3.30181e+07	1.34888e+08	2.28955e+07	2.99765e+07	3.10545e+07	9.37886e+07	-0.0419702	-0.637848	0.6124	2.98167e+07	2.49271e+07	2.07196e+07	1.81656e+07	1.53318e+07	3.60849e+07	-0.215209	-0.211079	0.240943	4.91043e+07	5.45916e+07	4.97362e+07	97.4	70.8	18.1	48.5	5.87	-1.23	0.942	-1.08	0.653	-2.53
E7FD42	EH domain-binding protein 1 OS=Danio rerio OX=7955 GN=ehbp1 PE=4 SV=2	ehbp1	9	230214036	2.47142e+08	2.10555e+08	2.62529e+08	1.51802e+08	1.55714e+08	1.69193e+08	2.36297e+08	2.01168e+08	1.28458e+08	2.33226e+08	2.59333e+08	2.34083e+08	2.04217e+08	1.82743e+08	2.60124e+08	2.56343e+08	1.8935e+08	4.68803e+08	1.79659e+08	1.63818e+08	0.255809	-0.154371	-0.0629027	1.61387e+08	1.40305e+08	1.11558e+08	1.96035e+08	1.62874e+08	4.49019e+08	0.0844642	0.0647791	0.604766	2.11093e+08	2.09086e+08	2.02613e+08	16.9	63.4	18.2	58.1	2.13	1.15	0.94	1.96	0.197	-1.71
F1QDB4	RalA-binding protein 1 OS=Danio rerio OX=7955 GN=ralbp1 PE=4 SV=1	ralbp1	1	0	0	3.62265e+06	0	1.48669e+06	0	564045	0	0	0	1.5985e+06	0	835924	585018	623189	190217	430728	3.30346e+06	347553	1.68802e+06	362218	0.261771	0.593175	-0.96	537801	180078	574030	277074	1.2048e+06	1.05903e+06	-0.288027	0.825455	0.265972	771328	587499	669172	132	96.3	50.6	58.9	13.6	-1.64	0.94	1.97	0.366	-3.04
E7F6Y9	Dishevelled-associated activator of morphogenesis 1a (Fragment) OS=Danio rerio OX=7955 GN=daam1a PE=4 SV=2	daam1a	6	0	0	0	0	4.63784e+07	0	1.91885e+07	3.17531e+07	4.30692e+07	1.50904e+07	2.60216e+07	0	1.62343e+07	2685172	1.52211e+07	2.71208e+06	3.16346e+06	3.27591e+06	1.77077e+06	6.41361e+06	2.23302e+06	-0.18514	0.30694	-0.16644	2.26756e+07	2.11631e+07	2.66911e+07	2.3972e+07	1.9391e+07	3.861e+07	0.0241466	-0.0379792	0.160335	1.6651e+07	9.48068e+06	1.15966e+07	9.78	73.7	12.2	36.7	29.3	1.14	0.939	1.16	0.644	7.71
E7F5I3	Periostin, osteoblast-specific factor a OS=Danio rerio OX=7955 GN=postna PE=1 SV=2	postna	1	0	0	0	0	0	0	0	0	6.42943e+06	0	0	0	0	0	0	202342	610928	1.00825e+06	518420	308324	899869	0.408595	-0.296982	-0.0493885	162056	301855	3.87184e+06	703841	848178	477674	0.637811	0.448688	-0.908786	593674	858960	424421	66.4	52.1	145	27.6	35	-1.05	0.937	-2.14	0.902	2.38
A0A0R4IFK0	Calpain 2, (m/II) large subunit a OS=Danio rerio OX=7955 GN=capn2a PE=1 SV=1	capn2a	3	881880	0	9.15274e+06	1.73795e+06	1.22829e+07	3.27566e+06	1.14791e+06	17377632	14576701	0	959649	2.69764e+06	3.40948e+06	4410305	980702	1.74924e+06	3.21291e+06	8.81531e+06	2.91676e+06	5.48203e+06	3.54075e+06	0.222051	0.232042	-0.396143	9.3251e+06	1.118e+07	8.90074e+06	1.12817e+06	1.81796e+06	5.06635e+06	-0.91728	-0.788859	-0.244731	4.20823e+06	4.65136e+06	4.61867e+06	81.2	33.6	12.4	78.7	5.5	-1.15	0.936	-3.67	0.0742	2.13
F1Q8D1	LIM domain-binding 3a OS=Danio rerio OX=7955 GN=ldb3a PE=1 SV=1	ldb3a	12	5.11051e+08	5.41751e+08	5.53582e+08	406217382	1.43494e+08	5.37274e+08	7.46159e+07	1.28476e+08	1.58514e+08	7.3367e+07	1.33294e+08	4.25844e+08	3.47418e+08	305427792	296979835	5.62205e+08	5.64666e+08	4.96411e+08	6.72411e+08	2.75732e+08	7.74964e+08	0.0777398	-0.311305	0.19344	6.64524e+07	9.75275e+07	8.45438e+07	1.08217e+08	1.30591e+08	5.94637e+08	0.211787	0.126787	0.84717	3.14099e+08	3.08137e+08	3.26627e+08	7.16	45.9	18.8	98.8	2.98	1.06	0.933	3.35	0.23	-6.53
Q6NW62	KH domain-containing, RNA-binding, signal transduction-associated 1b OS=Danio rerio OX=7955 GN=khdrbs1b PE=1 SV=1	khdrbs1b	2	0	0	0	0	7.75387e+06	0	0	0	0	0	0	0	0	0	0	1.29017e+06	919449	1.12698e+06	363401	2.65468e+06	1.65125e+06	-0.55026	0.460484	0.165896	741832	397959	209282	350897	952350	1.08378e+06	-0.325126	0.378959	0.714209	977595	554738	722746	16.7	73.8	60	49.1	28.3	1.4	0.932	1.77	0.312	-2.47
A0A0R4IGQ8	Myomesin 1b OS=Danio rerio OX=7955 GN=myom1b PE=1 SV=1	myom1b	38	6.26974e+08	7.32797e+08	7.64534e+08	4.75539e+08	3.87286e+08	6.70782e+08	1.86138e+08	3.80624e+08	5.66534e+08	1.06126e+08	2.8612e+08	5.30711e+08	5.2418e+08	4.64876e+08	4.77247e+08	7.52005e+08	7.51246e+08	6.99518e+08	9.9031e+08	5.75688e+08	6.60656e+08	0.11955	-0.115595	-0.0248233	2.1191e+08	2.44007e+08	2.84009e+08	2.31659e+08	2.10584e+08	7.00359e+08	0.0386967	-0.0639769	0.391989	4.61656e+08	4.79894e+08	5.2589e+08	4.1	29.5	14.6	72.7	6.77	1.01	0.931	1.54	0.544	-2.98
B5DE31	Ybx1 protein OS=Danio rerio OX=7955 GN=ybx1 PE=2 SV=1	ybx1	3	0	0	359266	0	1.99054e+06	0	0	0	501286	0	0	477352	0	0	0	1.42236e+06	1.59619e+06	1.42199e+06	1.85936e+06	2.42606e+06	632747	0.116356	0.181817	-0.351667	828068	1.55921e+06	625203	1.32591e+06	1.5361e+06	1.12433e+06	0.204449	-0.00648692	0.254874	907050	2.12171e+06	1.99579e+06	6.79	55.9	48.9	15.5	39.9	1.11	0.93	1.32	0.327	-1.47
A0A1D5NSS7	Thyroid hormone receptor interactor 6 OS=Danio rerio OX=7955 GN=trip6 PE=1 SV=1	trip6	1	0	2.17059e+06	1.39357e+06	2.59493e+06	842537	1.3384e+06	0	0	0	0	0	0	0	0	0	2.12681e+06	2.20593e+06	1.27822e+06	3.96866e+06	951794	1.37727e+06	0.270915	-0.365049	0.0324138	478258	458269	734572	330047	424822	431793	-0.161087	-0.0329127	-0.230759	565532	613887	966968	27.5	77.8	27.7	14.4	30.6	1.12	0.926	-1.41	0.152	-3.36
E7FDI9	Histone-lysine N-methyltransferase OS=Danio rerio OX=7955 GN=setd3 PE=1 SV=1	setd3	3	3.5865e+06	5.61251e+06	7.04264e+06	4662063	0	7.32441e+06	0	2.05992e+06	0	0	0	3.75185e+06	2.89019e+06	1.89414e+06	5.93122e+06	4.29368e+06	6.56634e+06	6.43855e+06	7.28858e+06	2.98116e+06	7.54686e+06	0.229813	-0.342938	0.068978	2.24105e+06	1.66942e+06	760546	794385	566508	5.53607e+06	-0.45042	-0.469358	0.862076	3.43759e+06	4.40391e+06	6.6521e+06	22.1	43.2	48	122	34.1	1.03	0.926	1.48	0.959	-3.7
A7MCL8	Etfb protein OS=Danio rerio OX=7955 GN=etfb PE=2 SV=1	etfb	7	3.02666e+07	2.50315e+07	1.28762e+07	3.39958e+06	7.58465e+07	1.57158e+07	4.86785e+07	1.42808e+08	168189737	2.83898e+07	61453819	2177285	4.36067e+07	4.05308e+07	4.17846e+07	3.43637e+07	2.6545e+07	2.84705e+07	2.36773e+07	5.7789e+07	2.10717e+07	-0.161768	0.337863	-0.130697	6.8153e+07	8.85109e+07	9.69652e+07	4.19246e+07	4.49574e+07	3.96557e+07	-0.211016	-0.294196	-0.38831	4.1061e+07	4.26261e+07	4.67592e+07	13.7	59.9	17.5	6.31	6.77	1.15	0.924	-2	0.015	2.84
Q7T2P2	T-complex protein 1 subunit gamma OS=Danio rerio OX=7955 GN=cct3 PE=1 SV=1	cct3	3	0	0	0	0	7.63975e+06	0	2.00715e+06	2611975	1.00156e+07	2.69896e+06	2.01676e+06	0	1.68018e+06	2.9052e+06	1.1546e+06	1.92391e+06	1.42589e+06	1.84984e+06	456054	8.72421e+06	938340	-0.625168	0.786639	-0.294773	3.16008e+06	2.1472e+06	6.12529e+06	4.41246e+06	2.01495e+06	2.46614e+06	0.144983	-0.0276086	-0.395109	2.60294e+06	3.60114e+06	1.9401e+06	15.5	138	54.2	43	30.8	1.95	0.919	-1.29	0.612	2.2
F1Q947	Ndrg family member 3b OS=Danio rerio OX=7955 GN=ndrg3b PE=1 SV=1	ndrg3b	1	0	0	0	0	1.00715e+06	0	0	0	0	0	0	0	0	0	0	168202	211015	961589	207331	1.13957e+06	107585	0.0908337	0.732429	-0.951239	471355	1.09524e+06	95912.6	127842	206265	305697	-0.566673	-0.725084	0.503415	388876	377464	209629	99.8	117	91.1	41.8	30.8	1.08	0.918	-2.6	0.493	1.24
A0A0R4IXK1	Peroxisomal biogenesis factor 5-like a OS=Danio rerio OX=7955 GN=pex5la PE=4 SV=1	pex5la	1	0	0	0	0	2.14105e+06	0	1.12247e+06	1.86643e+06	2.39972e+06	1.27748e+06	2310662	0	0	0	0	797248	203451	406485	103723	2.43894e+06	367386	-0.885718	1.07874	-0.0439209	1.0676e+06	1.23655e+06	1.49194e+06	1.77084e+06	1.72891e+06	1.388e+06	0.219773	0.145562	-0.0313621	299934	864471	343997	64.3	132	16.9	12.9	62.4	2.07	0.917	1.29	0.111	2.7
A5WUQ7	Apolipoprotein Bb, tandem duplicate 2 OS=Danio rerio OX=7955 GN=apobb.2 PE=1 SV=2	apobb.2	2	0	0	0	0	6123483	0	0	4.85553e+06	5.30362e+06	1.10262e+06	4.29774e+06	0	1.21251e+06	1.24898e+06	586378	1.00252e+06	840048	1.26431e+06	518764	6.99976e+06	408103	-0.286123	0.920779	-0.491085	2.86568e+06	3.19169e+06	3.28569e+06	1.72202e+06	3.21834e+06	2.40664e+06	-0.22119	0.00361122	-0.135215	1.43478e+06	2.06993e+06	903429	20.7	143	7.08	30.6	39.7	2.55	0.915	-1.27	0.27	3.01
Q7T1K0	Ribosomal protein L17 OS=Danio rerio OX=7955 GN=rpl17 PE=1 SV=1	rpl17	4	13859061	579016	1.11357e+06	634596	3.45409e+07	1.04942e+06	7.7678e+07	9.35205e+07	2.61751e+07	4.78617e+07	8.31279e+06	544125	7.81755e+06	5.4198e+07	5.98699e+06	2.63484e+06	1.50108e+06	3.12408e+06	2.64626e+06	2.70808e+06	1.56078e+06	0.00187823	0.256256	-0.301379	7.29132e+07	5.66024e+07	7.08171e+07	8.84822e+06	7.27749e+06	6.0005e+06	-0.91595	-0.890853	-1.07195	8.0951e+06	5.72351e+07	1.09995e+07	34.4	28	13.3	19.3	108	-1.05	0.913	-9.05	0.000171	27.6
A0A0R4ID08	Calpain 1, (mu/I) large subunit a OS=Danio rerio OX=7955 GN=capn1a PE=1 SV=1	capn1a	3	5.57817e+06	13603234	9.55888e+06	3.90264e+06	12935583	7.91633e+06	12531642	2.83594e+07	27676356	1.43182e+07	29058400	8.57045e+06	8.9316e+06	14967839	13523936	7.45884e+06	1.48504e+07	9.27018e+06	7.17291e+06	1.50945e+07	8.51766e+06	-0.0169762	0.00708035	-0.0367683	2.11274e+07	1.85275e+07	1.63613e+07	2.13423e+07	2.1863e+07	1.42178e+07	0.00439398	0.0718933	-0.0609864	9.52858e+06	1.64946e+07	1.60357e+07	36.6	41.3	12.8	22.3	27.8	-1.03	0.912	1.03	0.945	1.77
F1Q5B8	Oxoglutarate (alpha-ketoglutarate) dehydrogenase a (lipoamide) OS=Danio rerio OX=7955 GN=ogdha PE=1 SV=2	ogdha	13	3.69105e+07	3.56438e+07	4.47219e+07	1.99705e+07	6.6822e+07	2.96128e+07	2.62914e+07	6.79661e+07	9.94358e+07	1.97124e+07	41191272	2.42958e+07	4.45217e+07	3.83266e+07	4.24848e+07	4.29851e+07	3.712e+07	4.73917e+07	3.80551e+07	6.41761e+07	3.3476e+07	-0.052905	0.237765	-0.150968	4.28148e+07	4.51449e+07	5.49346e+07	2.45689e+07	3.21353e+07	4.10582e+07	-0.241209	-0.147627	-0.126446	4.23852e+07	4.51688e+07	4.80604e+07	12.1	36.6	13.5	25.3	6.28	1.06	0.911	-1.46	0.0987	1.12
Q6R3L1	Paxillin OS=Danio rerio OX=7955 GN=pxna PE=2 SV=1	pxna	1	0	0	0	0	640628	0	0	0	1.51876e+06	1017637	1.52603e+06	1.427e+06	0	0	0	935387	187370	212514	159612	721932	252682	-0.767926	0.585796	0.0751861	106115	184502	958313	1.40322e+06	1.15124e+06	2.04919e+06	1.12135	0.795162	0.330074	253023	931959	343827	95.4	79.7	113	30.2	72.3	-1.18	0.91	3.69	0.113	-1.07
A0A0G2KJ38	Uncharacterized protein OS=Danio rerio OX=7955 PE=1 SV=1	A0A0G2KJ38	2	0	0	0	0	1.19003e+07	0	6390321	1.62212e+07	9797151	4.10874e+06	5126832	0	1.85906e+06	5.395e+06	5.36763e+06	893982	723869	1.97079e+06	786469	1.2503e+06	1.14244e+06	-0.0556474	0.237354	-0.236807	6.055e+06	1.0303e+07	5.95148e+06	5.75951e+06	4.62779e+06	7.11518e+06	-0.0217291	-0.347592	0.0775609	3.64227e+06	5.42053e+06	5.80908e+06	56.5	22.9	33.4	21.3	23.3	-1.13	0.908	-1.27	0.371	6.22
C1IHU9	Intelectin 3 OS=Danio rerio OX=7955 GN=itln3 PE=2 SV=1	itln3	1	3.06451e+08	38411368	4.19589e+07	4.06259e+07	1.14688e+08	3.93011e+07	1.185e+07	2.67716e+07	1.55727e+07	8.61453e+07	54796935	8.86116e+06	1.7439e+07	23649569	46844956	3.40499e+08	3.91611e+07	3.76939e+07	6.72495e+07	1.35376e+08	4.07209e+07	-0.704427	0.538688	0.0335462	1.11755e+07	1.64397e+07	9.11338e+06	1.31685e+08	3.85101e+07	1.33322e+07	1.07127	0.369682	0.165221	1.58056e+07	2.37779e+07	5.14743e+07	125	60.2	30.9	102	61.7	-1.72	0.908	5	0.198	-11.4
F1QMB3	Family with sequence similarity 131, member Ba OS=Danio rerio OX=7955 GN=fam131ba PE=4 SV=1	fam131ba	1	0	3.09772e+06	0	0	1.36642e+06	0	1.27422e+06	1.40978e+06	1.76354e+06	0	0	0	908940	0	0	169872	3.14939e+06	389222	243334	1.5503e+06	811437	0.156081	-0.307812	0.319057	1.21138e+06	941512	1.1074e+06	935434	224689	456961	-0.112267	-0.622244	-0.384425	838287	729444	229947	134	75.5	12.5	67.2	54.1	-1.42	0.907	-2.02	0.169	-1.14
A0A0R4IFJ4	Pyruvate carboxylase OS=Danio rerio OX=7955 GN=pcxa PE=1 SV=1	pcxa	107	1.6412e+10	2.10201e+10	8.98045e+09	7.44483e+09	1.87106e+10	8.75498e+09	1.42726e+10	1.49908e+10	2.26421e+10	9.75768e+09	1.72893e+10	1.25584e+10	1.42321e+10	1.2674e+10	1.1629e+10	1.84784e+10	2.15165e+10	7.75167e+09	1.33047e+10	2.16371e+10	9.1011e+09	-0.142658	0.00242752	0.069699	1.33347e+10	8.61131e+09	1.18957e+10	1.52061e+10	1.17921e+10	2.06821e+10	0.0570353	0.136521	0.240205	1.27312e+10	1.27821e+10	1.28983e+10	45.4	43.5	21.5	28.2	0.669	-1.08	0.9	1.41	0.189	-1.41
A0A0R4IP09	Pleckstrin homology domain-containing, family A member 6 OS=Danio rerio OX=7955 GN=plekha6 PE=1 SV=1	plekha6	13	1.7771e+07	2.53242e+07	1.73767e+07	7455038	4.08577e+07	2665549	5.1364e+07	1.53953e+08	129696807	1.49372e+07	9.34599e+07	1.35182e+07	4.29532e+07	29706595	3.08158e+07	2.23212e+07	2.91532e+07	1.91783e+07	2.1897e+07	2.20251e+07	2.744e+07	-0.00833418	-0.121769	0.155573	6.34096e+07	8.23441e+07	7.68895e+07	2.55296e+07	4.19292e+07	3.09282e+07	-0.395112	-0.293116	-0.395512	4.14876e+07	3.34324e+07	4.19883e+07	21.7	13.3	13.1	25.5	12.3	1.01	0.899	-2.26	0.0139	3.15
Q801M3	Myosin light chain 2 Mlc2a OS=Danio rerio OX=7955 GN=myl7 PE=1 SV=1	myl7	15	1712601176	1.8204e+09	2.2968e+09	1.49474e+09	1.18801e+09	2.03932e+09	1.51572e+09	2.75355e+09	2459071677	9.99684e+08	3.04454e+09	1664225808	1.86165e+09	1.77967e+09	1.64355e+09	1.90276e+09	1.87064e+09	2.03718e+09	2.60557e+09	1.41459e+09	2.1289e+09	0.136518	-0.12136	0.0191252	1.41444e+09	1.55145e+09	1.28298e+09	1.55731e+09	2.03742e+09	2.72347e+09	0.0417892	0.118342	0.326904	1.65949e+09	1.78699e+09	1.82419e+09	4.56	29.2	9.48	27.8	4.92	1.06	0.898	1.49	0.136	-1.37
Q5TZD5	Ras homolog family member J OS=Danio rerio OX=7955 GN=rhoj PE=4 SV=1	rhoj	2	0	0	0	0	14669947	0	1.69613e+07	2.32386e+07	2.07316e+07	6.13689e+06	20090203	0	2.9473e+06	1.9827e+06	0	1.16395e+06	833065	842309	504905	3.2383e+06	649498	-0.362723	0.589638	-0.112893	1.69897e+07	1.50518e+07	1.20793e+07	8.93106e+06	1.46799e+07	6.43558e+07	-0.279282	-0.0108674	0.726546	3.49362e+06	2.78477e+06	2.19456e+06	19.9	105	16.8	104	23	1.55	0.895	1.99	0.631	15.5
F1QAJ0	Filamin A-interacting protein 1b OS=Danio rerio OX=7955 GN=filip1b PE=4 SV=2	filip1b	1	633076059	6.19606e+08	6.20213e+08	7.99673e+08	2.67766e+08	416099080	578619011	6.52914e+08	6.28982e+08	258880456	6.48206e+08	8.3035e+08	6.85445e+08	5.8242e+08	4.9564e+08	7.0617e+08	6.33647e+08	5.48079e+08	1.4422e+09	3.18471e+08	4.332e+08	0.310117	-0.298778	-0.102155	5.38105e+08	3.66036e+08	3.26578e+08	4.05978e+08	4.33804e+08	1.40288e+09	-0.122365	0.0737703	0.633034	6.07939e+08	5.86178e+08	5.5152e+08	12.6	84.6	27.4	75.9	4.89	1.16	0.894	1.82	0.386	-1.53
Q7ZUQ1	Cdc42l protein OS=Danio rerio OX=7955 GN=cdc42l PE=1 SV=1	cdc42l	4	1.48905e+07	12223019	6.88728e+06	6.59523e+06	4.11832e+07	8.87026e+06	26089951	3.14534e+07	41870473	26074096	4.4113e+07	1.52684e+07	43234424	26511853	16488614	1.67026e+07	1.29848e+07	1.3738e+07	1.06006e+07	2.51653e+07	9.69941e+06	-0.197456	0.287364	-0.151179	2.48956e+07	2.00537e+07	2.48668e+07	3.879e+07	3.17421e+07	2.45416e+07	0.192598	0.199442	-0.00571644	3.98783e+07	2.80445e+07	3.26316e+07	13.6	57.3	12	22.5	17.8	1.05	0.893	1.36	0.141	1.61
Q7ZTT4	Chloride intracellular channel 4 OS=Danio rerio OX=7955 GN=clic4 PE=1 SV=1	clic4	1	10227556	1.09234e+07	6.93578e+06	5.89016e+06	1.1298e+07	5.50763e+06	7.28744e+06	1.073e+07	15931795	6.00877e+06	12692747	6499657	11593559	9.0052e+06	6721875	1.11575e+07	1.11211e+07	6.29964e+06	9.22329e+06	1.30627e+07	5.68388e+06	-0.0826795	0.0698855	-0.0446711	6.8847e+06	6.76299e+06	9.31664e+06	8.63436e+06	9.18222e+06	9.70204e+06	0.098345	0.132809	0.0176035	1.0533e+07	9.05128e+06	7.31004e+06	29.3	39.6	18.8	5.82	18	-1.02	0.893	1.2	0.201	-1.24
Q7T382	Transmembrane protein 134 OS=Danio rerio OX=7955 GN=tmem134 PE=2 SV=1	tmem134	1	0	0	0	0	729881	0	0	754788	760848	566991	0	0	0	0	0	960183	177437	437816	876555	823471	144086	-0.0395749	0.666603	-0.482669	529704	513138	490940	771275	381269	836250	0.163176	-0.129003	0.231308	264261	775656	232716	75.9	66.4	3.8	37.1	71.8	1.17	0.892	1.3	0.5	-1.03
F1R1C0	Acyl-CoA synthetase family member 2, mitochondrial OS=Danio rerio OX=7955 GN=acsf2 PE=1 SV=1	acsf2	4	0	0	0	0	2.40303e+07	0	4.30693e+06	5.33466e+06	10465618	1.73806e+06	2.52706e+06	0	2.92769e+06	3.78809e+06	2.98629e+06	2.19078e+06	1.46179e+06	2.21733e+06	1.06143e+06	9.59983e+06	992066	-0.314708	0.817377	-0.34929	4.96831e+06	4.09605e+06	7.90186e+06	3.48141e+06	2.44438e+06	2.5791e+06	-0.154453	-0.224197	-0.486261	3.5435e+06	4.48403e+06	3.88604e+06	21.9	127	35.3	19.9	12	1.99	0.89	-1.99	0.0556	2.89
E7EXC7	Ubiquitin-specific peptidase 9 OS=Danio rerio OX=7955 GN=usp9 PE=1 SV=1	usp9	10	47268158	5.8135e+07	3.77134e+07	4.09079e+07	4.35651e+06	4.31111e+07	3.27549e+06	5.63691e+06	9.09948e+06	2.08001e+06	5.51985e+06	4.22341e+07	2.59649e+07	2.51499e+07	25156351	5.13769e+07	5.91509e+07	4.10098e+07	6.59164e+07	3.75834e+07	4.59651e+07	0.108225	-0.196965	0.0495406	6.14565e+06	6.80128e+06	8.5875e+06	1.50735e+07	1.14576e+07	4.99568e+07	0.389648	0.226503	0.764728	2.46978e+07	3.0925e+07	2.7939e+07	18	29.2	17.6	83.4	11.2	-1.01	0.887	3.55	0.138	-7.04
A0A286Y8V7	Dolichyl-diphosphooligosaccharide--protein glycosyltransferase subunit 1 OS=Danio rerio OX=7955 GN=rpn1 PE=1 SV=1	rpn1	1	0	0	0	0	3430748	0	0	0	0	0	0	0	0	0	0	535972	329941	356468	80100.1	3.92457e+06	348962	-0.825509	1.07536	-0.00924159	787781	303526	787396	117751	142393	743924	-0.825439	-0.328708	-0.0246647	952074	256266	562803	27.5	148	44.6	106	59.1	3.56	0.886	-1.87	0.265	1.54
M9MMC0	Obscurin-like 1a OS=Danio rerio OX=7955 GN=obsl1a PE=4 SV=1	obsl1a	4	2.22563e+07	5364160	5.43984e+06	2.24844e+06	4.75604e+06	1.38177e+07	3.56965e+06	2.33145e+06	3.31635e+06	1.02905e+06	2.80077e+06	1.35963e+07	1.00741e+07	6.38396e+06	5.66651e+06	2.55361e+07	5.91154e+06	5.49672e+06	8.04199e+06	5.52978e+06	1.42492e+07	-0.501792	-0.0289926	0.413688	3.86383e+06	3.40188e+06	2.35011e+06	2.96908e+06	4.35972e+06	2.12513e+07	-0.114396	0.10774	0.956297	9.44037e+06	7.05764e+06	7.33169e+06	93	48.4	24.2	107	16.4	-1.33	0.885	2.97	0.35	-3.84
Q1L8R2	Splicing factor proline/glutamine-rich OS=Danio rerio OX=7955 GN=sfpq PE=1 SV=1	sfpq	3	2.18745e+07	2.73337e+07	2.88078e+07	17375252	2.11105e+07	1.69401e+07	16900660	2.06797e+07	6.69404e+06	12595541	22992279	1.76145e+07	1.83883e+07	2.44823e+07	1.93287e+07	2.42126e+07	2.78379e+07	2.65489e+07	3.62604e+07	2.52898e+07	1.74916e+07	0.175391	-0.0416904	-0.181216	1.93391e+07	1.29913e+07	9.89589e+06	1.8299e+07	1.67305e+07	2.76053e+07	-0.0240084	0.109856	0.445537	1.74442e+07	2.51533e+07	2.3635e+07	7.01	35.8	34.2	28.2	18.5	1.01	0.88	1.48	0.179	-1.86
P02662	Alpha-S1-casein OS=Bos taurus GN=CSN1S1 PE=1 SV=2	CSN1S1	3	2.66365e+07	1.08306e+07	1.1896e+07	1.6681e+07	6.12966e+06	1.65878e+07	6.22121e+06	8.62373e+06	7.23118e+06	5.41467e+06	7.13988e+06	9.94011e+06	1.05119e+07	9296474	1.33386e+07	2.06224e+07	1.12702e+07	1.09846e+07	2.64977e+07	7.00382e+06	1.71303e+07	0.108869	-0.206597	0.192982	5.89697e+06	5.58052e+06	5.27735e+06	8.49887e+06	5.36349e+06	1.52811e+07	0.158732	-0.0172271	0.461738	9.59554e+06	1.15943e+07	1.45149e+07	38.4	57.8	5.55	52.2	20.8	1.18	0.879	1.74	0.265	-2.56
A0A0R4IKU1	Si:ch211-126j24.1 OS=Danio rerio OX=7955 GN=si:ch211-126j24.1 PE=4 SV=1	si:ch211-126j24.1	1	0	0	0	0	0	0	0	1.5858e+06	0	0	0	0	0	0	0	799480	938976	178165	313562	501456	1.18692e+06	-0.406484	-0.272422	0.8236	142089	1.05551e+06	1.11418e+06	173128	1.0735e+06	138310	0.0858089	0.00733713	-0.9061	887911	405043	645384	63.4	68.9	70.7	115	37.4	1.04	0.875	-1.67	0.542	1.21
A0A0R4ITJ4	Integrin, alpha 5 (fibronectin receptor, alpha polypeptide) OS=Danio rerio OX=7955 GN=itga5 PE=1 SV=1	itga5	1	0	0	0	0	1.69946e+06	0	1.25184e+06	2374805	2.70339e+06	0	2.60142e+06	0	675108	1.80965e+06	712560	359553	769145	443957	86854.5	1.93192e+06	445842	-0.616971	0.399981	0.0018407	1.19018e+06	1.56259e+06	1.67427e+06	113056	1.9419e+06	614493	-1.02232	0.094384	-0.435309	623725	1.81798e+06	765685	41.3	119	17.2	106	61	1.57	0.873	-1.66	0.332	2.82
F1R3D3	Glyceraldehyde-3-phosphate dehydrogenase OS=Danio rerio OX=7955 GN=gapdhs PE=1 SV=1	gapdhs	10	1.49597e+08	1.67353e+08	3.80735e+07	9.0286e+07	4.35394e+08	9.847e+07	1.61453e+08	4.44497e+08	2.49736e+08	2.52508e+08	5.77327e+08	1.44232e+08	205310384	1.94866e+08	1.83731e+08	1.6673e+08	1.71525e+08	1.6688e+08	1.4736e+08	3.95742e+08	1.02418e+08	-0.053635	0.363085	-0.212029	1.91064e+08	2.59978e+08	1.41764e+08	3.80478e+08	4.01834e+08	4.66856e+08	0.299152	0.189111	0.517616	1.85601e+08	1.98608e+08	2.01692e+08	1.62	73.4	30	10.8	4.37	1.28	0.87	2.11	0.0362	1.17
B8A4V2	Annexin OS=Danio rerio OX=7955 GN=anxa11a PE=1 SV=1	anxa11a	1	0	0	0	0	2027223	0	1.18262e+06	2.01842e+06	1.85651e+06	1.50602e+06	2780861	0	1.41438e+06	1.21622e+06	0	735261	155660	437805	99891.4	2.30814e+06	376401	-0.866914	1.17109	-0.0656291	1.1246e+06	1.33426e+06	1.16384e+06	2.09565e+06	2.07311e+06	2.69551e+06	0.27032	0.191383	0.364748	1.30105e+06	1.22166e+06	540264	65.4	130	9.23	15.4	41	2.1	0.869	1.89	0.00598	2.73
A0A286Y8V3	Si:dkey-164f24.2 OS=Danio rerio OX=7955 GN=si:dkey-164f24.2 PE=1 SV=1	si:dkey-164f24.2	7	3.39709e+07	3.66243e+07	54415784	3.71523e+07	8.256e+06	8.16318e+07	2.24848e+06	9.92904e+06	13814754	3.78963e+06	9.81482e+06	5.09898e+07	3.00438e+07	2.85956e+07	2.93253e+07	3.85895e+07	4.67903e+07	3.95626e+07	5.48611e+07	1.95317e+07	8.52632e+07	0.152796	-0.379415	0.333477	4.53502e+06	8.60399e+06	9.78909e+06	1.03589e+07	8.42844e+06	6.31731e+07	0.358736	-0.00895312	0.80979	3.20696e+07	2.94922e+07	3.397e+07	10.8	61.8	36.1	114	7.06	1.28	0.869	3.57	0.298	-5.45
E9QG95	Pecanex-like 3 (Drosophila) OS=Danio rerio OX=7955 GN=pcnxl3 PE=4 SV=1	pcnx3	1	0	0	0	0	474014	0	1.01746e+06	2.10023e+06	1.23447e+06	0	848473	0	344803	0	407987	987246	284278	433214	944766	532736	312617	-0.0191011	0.272768	-0.14169	968066	1.38677e+06	784169	125348	647569	519244	-0.887786	-0.330718	-0.179038	319824	367822	437102	65.2	53.8	29.5	63.2	15.7	1.05	0.868	-2.43	0.163	1.84
A0A0G2KF42	Uncharacterized protein OS=Danio rerio OX=7955 GN=arhgef25a PE=4 SV=1	arhgef25a	1	0	0	0	0	3.92522e+06	0	3234281	4.76771e+06	7.07542e+06	0	0	0	0	0	0	817210	537038	537638	86200.5	4.49562e+06	1.18031e+06	-0.976824	0.922784	0.341505	3.06448e+06	3.07536e+06	4.24768e+06	596091	113545	483551	-0.711044	-1.43273	-0.943709	192720	370433	201333	25.6	120	19.6	63.5	39.3	3.05	0.867	-8.71	0.0403	5.49
F6NYL9	Hyperpolarization-activated cyclic nucleotide-gated potassium channel 4 (Fragment) OS=Danio rerio OX=7955 GN=hcn4 PE=4 SV=1	hcn4	20	1.0503e+07	6.35808e+06	2.92756e+06	2.57004e+06	1.18542e+08	1.38221e+06	2.02085e+08	4.06811e+08	3.40313e+08	3.68225e+07	1.81709e+08	1.41256e+06	1.00393e+08	7.80819e+07	8.10775e+07	1.91677e+07	1.55758e+07	1.38118e+07	1.6125e+07	2.01306e+07	1.14543e+07	-0.0750719	0.111409	-0.0812832	1.94654e+08	2.50906e+08	1.97202e+08	5.76794e+07	1.00073e+08	8.98461e+07	-0.528243	-0.399193	-0.341413	9.34871e+07	8.20032e+07	9.13826e+07	16.9	27.3	14.8	26.8	6.87	-1.02	0.867	-2.6	0.015	13.2
A2BIC6	Leucine aminopeptidase 3 OS=Danio rerio OX=7955 GN=lap3 PE=1 SV=1	lap3	1	0	0	0	0	0	647542	0	1.28497e+06	2.36409e+06	0	0	0	0	0	0	742151	281334	739160	1.14944e+06	135867	665367	0.189994	-0.316109	-0.0456769	2.41999e+06	860428	1.4705e+06	522099	137095	670038	-0.666061	-0.797693	-0.341365	865084	383367	337630	45.1	78	49.6	62.1	55.3	1.11	0.866	-3.57	0.0877	2.7
Q7ZVE1	LOC402804 protein (Fragment) OS=Danio rerio OX=7955 GN=bphl PE=2 SV=1	bphl	2	3.11404e+06	0	0	0	5.19625e+06	0	1.57764e+07	32748325	3.49337e+07	8628451	25512351	0	6.43512e+06	0	4.6691e+06	4.4093e+06	1.42905e+06	389801	630774	1.82456e+06	1.37836e+06	-0.844496	0.106109	0.548521	1.48945e+07	2.02512e+07	2.01595e+07	1.27498e+07	1.83167e+07	2.85601e+07	-0.0675222	-0.043604	0.151279	5.88714e+06	4.56181e+06	5.05043e+06	100	47.2	16.6	40.3	13	-1.62	0.863	1.08	0.912	8.88
F1Q924	Collagen, type VI, alpha 4a (Fragment) OS=Danio rerio OX=7955 GN=col6a4a PE=1 SV=1	col6a4a	1	0	0	0	0	0	0	0	0	3.04288e+06	0	0	0	797644	0	0	443028	262728	657433	534939	176791	1.14511e+06	0.0818728	-0.172048	0.240994	624419	174169	1.87733e+06	182329	136510	329456	-0.534621	-0.105806	-0.755742	736209	749299	373266	43.5	79.1	98.9	46.6	34.4	1.36	0.861	-4.13	0.255	1.96
A7YYI8	Zgc:56272 OS=Danio rerio OX=7955 GN=stx4 PE=2 SV=1	stx4	4	3.58904e+06	15528891	3.02329e+06	2.54022e+06	1.18571e+07	3.02127e+06	1.79187e+07	4.77678e+07	17743535	1.36355e+07	35930956	0	4095790	9367939	1.14737e+07	5.56517e+06	1.70812e+07	4.5834e+06	5.09906e+06	1.43449e+07	4.37079e+06	-0.0379883	-0.0758202	-0.0206279	1.72261e+07	1.82419e+07	1.64283e+07	1.96181e+07	2.63437e+07	4.68332e+07	0.0564699	0.159607	0.45496	6.68683e+06	1.01237e+07	1.16271e+07	76.6	70	5.25	45.8	26.7	-1.14	0.861	1.79	0.18	1.91
Q7SX76	FGF receptor-like protein 1a OS=Danio rerio OX=7955 GN=fgfrl1a PE=1 SV=1	fgfrl1a	2	1.12696e+06	0	2.33108e+06	0	5332479	904476	6.36459e+06	7.58574e+06	8.69412e+06	2.05753e+06	1.03087e+07	1.3435e+06	1.74073e+06	3.50877e+06	3.75032e+06	1.8805e+06	1.78743e+06	2.33201e+06	830619	6.08632e+06	1.06412e+06	-0.354871	0.532125	-0.340741	6.03037e+06	4.91506e+06	5.30099e+06	3.02476e+06	7.58932e+06	2.96977e+06	-0.299652	0.188674	-0.251634	4.25476e+06	3.52494e+06	4.05107e+06	14.6	112	10.5	58.6	9.55	1.33	0.86	-1.2	0.465	2.71
F1QAJ7	Solute carrier family 25 (mitochondrial carrier; phosphate carrier), member 3b OS=Danio rerio OX=7955 GN=slc25a3b PE=1 SV=1	slc25a3b	9	312537311	2.76956e+08	134105970	3.01635e+08	1.56e+08	1.50766e+08	2.80717e+08	4.42288e+08	4.83634e+08	9.94916e+07	376203560	1.66337e+08	3.73335e+08	3.00556e+08	2.15748e+08	3.46794e+08	2.8393e+08	1.15999e+08	5.33456e+08	1.82664e+08	1.56613e+08	0.187027	-0.191559	0.130373	2.63504e+08	2.65658e+08	2.70004e+08	1.4702e+08	2.62307e+08	3.32838e+08	-0.253409	-0.00551391	0.0908625	3.3507e+08	3.02527e+08	2.37434e+08	47.9	72.3	1.24	37.9	17	1.17	0.86	-1.08	0.648	1.07
Q7T356	14-3-3 protein beta/alpha-B OS=Danio rerio OX=7955 GN=ywhabb PE=2 SV=1	ywhabb	4	6.68845e+06	22139572	9.04473e+06	7.00761e+06	30006304	3.43655e+06	18208993	4.74995e+07	3.009e+07	1.33909e+07	51973125	1.77768e+07	2.46535e+07	1.18066e+07	1.68197e+07	8.11572e+06	2.27777e+07	8.68192e+06	1.08683e+07	2.67168e+07	3.72535e+06	0.126835	0.0692755	-0.367449	1.72123e+07	2.96554e+07	1.79307e+07	1.9e+07	3.75142e+07	2.64413e+07	0.0429165	0.102092	0.168684	2.24702e+07	1.83011e+07	1.82545e+07	63	85.5	32.3	33.7	12.3	1.04	0.854	1.28	0.412	1.64
B8JMJ5	Si:ch1073-55a19.2 OS=Danio rerio OX=7955 GN=si:ch1073-55a19.2 PE=1 SV=2	si:ch1073-55a19.2	3	3599709	8.56469e+06	3444939	2226246	0	3.59501e+06	0	0	0	0	0	1583210	0	905239	2.02253e+06	4.21318e+06	8.70728e+06	7.9912e+06	4.25943e+06	2.29717e+07	4.33835e+06	0.00474191	0.42131	-0.265288	1.55656e+06	1.07629e+06	1.86037e+06	1.0463e+06	1.55735e+06	2.96655e+06	-0.172509	0.160457	0.202652	2.73997e+06	1.65997e+06	3.7207e+06	34.6	102	26.4	53.6	38.1	1.51	0.853	1.24	0.699	-4.65
E7FCE4	Receptor tyrosine kinase-like orphan receptor 2 OS=Danio rerio OX=7955 GN=ror2 PE=1 SV=1	ror2	28	2.98488e+08	2.74212e+08	1.39787e+08	4.25226e+07	1.33577e+09	6.04192e+07	1.28087e+09	1.8639e+09	2.09573e+09	6.09054e+08	1.59634e+09	7.22476e+07	7.54655e+08	6.40399e+08	6.56535e+08	3.39956e+08	2.89762e+08	1.41166e+08	1.10336e+08	9.35737e+08	8.15699e+07	-0.488706	0.509113	-0.2382	1.2017e+09	1.10119e+09	1.14575e+09	8.9403e+08	1.11055e+09	6.68508e+08	-0.128443	0.00367816	-0.233984	6.82582e+08	6.36748e+08	7.20698e+08	40.2	129	4.38	24.8	6.18	1.46	0.853	-1.29	0.199	4.47
F1QTD4	EFR3 homolog Ba (S. cerevisiae) OS=Danio rerio OX=7955 GN=efr3ba PE=4 SV=2	efr3ba	7	0	2.64593e+06	5.32502e+06	2.12477e+06	2.89644e+07	0	3.24841e+07	5.52911e+07	4.94246e+07	8.07182e+06	33830263	4702895	1.52285e+07	1.9038e+07	1.7429e+07	5.36114e+06	4.53622e+06	8.07763e+06	5.13395e+06	1.35901e+07	3.65977e+06	-0.0188054	0.476527	-0.343831	3.16074e+07	3.51416e+07	2.99446e+07	2.13702e+07	2.56813e+07	2.73787e+07	-0.169981	-0.136205	-0.0389056	1.53556e+07	2.0508e+07	2.05981e+07	30.9	71.8	8.23	12.5	15.9	1.25	0.853	-1.3	0.0489	5.38
Q5RGI5	Protein phosphatase 6, regulatory subunit 2a OS=Danio rerio OX=7955 GN=ppp6r2a PE=1 SV=1	ppp6r2a	2	5.54503e+06	6.52472e+06	4313166	2.41871e+06	0	2961137	0	0	0	0	0	3.12786e+06	2.32606e+06	2.1879e+06	1923734	6.01287e+06	6.63521e+06	6.32143e+06	3.81018e+06	1.39667e+07	3.5792e+06	-0.198137	0.32324	-0.247029	508267	1.08093e+06	1.14496e+06	968316	863999	4.78327e+06	0.279925	-0.0972848	0.620934	2.43142e+06	2.94323e+06	2.99694e+06	4.92	83.3	38.5	101	11.2	1.13	0.853	2.42	0.391	-6.94
Q6PI52	Calmodulin OS=Danio rerio OX=7955 GN=calm1a PE=2 SV=3; Duplicate proteins: B2GQW3|B2GQW3_DANRE	calm1a	1	0	0	2.0204e+06	0	0	4.13327e+06	0	0	0	0	0	0	0	0	0	231011	829795	1.84897e+06	129133	1.34324e+06	4.26306e+06	-0.252594	0.209183	0.362792	121149	133435	117833	413490	640736	121573	0.533144	0.681411	0.0135717	285167	257805	301985	84.3	111	6.62	66.4	7.92	1.97	0.85	3.16	0.198	-7.81
Q08BA1	ATP synthase subunit alpha OS=Danio rerio OX=7955 GN=atp5fa1 PE=1 SV=1	atp5fa1	44	1.75504e+09	1.87461e+09	1.58512e+09	9.77665e+08	2.36136e+09	8.329e+08	2.53931e+09	5.18657e+09	5.27884e+09	1.09869e+09	3.04047e+09	8.10334e+08	2.43944e+09	2.13162e+09	1.96911e+09	1.94332e+09	1.92726e+09	1.50354e+09	1.7372e+09	2.68554e+09	9.90084e+08	-0.0486951	0.144091	-0.181442	2.46623e+09	2.99896e+09	2.83092e+09	1.67284e+09	2.07964e+09	1.32434e+09	-0.168579	-0.158983	-0.329927	2.18103e+09	2.14908e+09	2.20067e+09	13.9	47.1	9.85	22.3	1.2	1.01	0.844	-1.63	0.0438	1.54
F1QGI3	Ribosomal protein L23a OS=Danio rerio OX=7955 GN=rpl23a PE=1 SV=1	rpl23a	3	1.91668e+06	1.43387e+07	1.80431e+07	2.1933e+07	2.59791e+06	24879735	4574168	11050973	0	0	24072428	1.63276e+07	1.37184e+07	10921701	1.55983e+07	1.76705e+07	1.45901e+07	1.77749e+07	3.55365e+07	6.98355e+06	2.58926e+07	0.303425	-0.319982	0.163368	5.23479e+06	7.50017e+06	5.79945e+06	1.20703e+07	1.91323e+07	1.79129e+07	0.36282	0.406697	0.48978	1.31538e+07	1.37887e+07	1.77762e+07	10.8	63.7	19.1	23.1	16.8	1.37	0.843	2.65	0.00716	-2.7
A0A0R4IQN8	Nascent polypeptide-associated complex subunit alpha OS=Danio rerio OX=7955 GN=naca PE=1 SV=1	naca	35	1.3264e+09	1.52084e+09	1291653663	1.67548e+09	3.51912e+08	1.23913e+09	6.27594e+08	6.15985e+08	6.62658e+08	3.36204e+08	7.56536e+08	6.57657e+09	1.03612e+09	9.86429e+08	9.05836e+08	1.46726e+09	1.55309e+09	1.16483e+09	2.88443e+09	9.05622e+08	1.28748e+09	0.293553	-0.23425	0.0434764	6.01057e+08	3.63481e+08	3.57198e+08	5.68762e+08	5.43674e+08	1.1203e+10	-0.0239851	0.174856	1.49643	9.27704e+08	9.9741e+08	1.01254e+09	14.6	62	31.6	150	4.62	1.21	0.842	9.32	0.333	-3.17
Q7ZVC1	Zgc:56116 OS=Danio rerio OX=7955 GN=pdlim5b PE=2 SV=1	pdlim5b	6	1.16778e+09	1.22941e+09	1062124501	9.41044e+08	6.73591e+08	8.33582e+08	7.95022e+08	841115698	8.10225e+08	526044061	911090034	9.44351e+08	1.09682e+09	9.70751e+08	9.71631e+08	1.30147e+09	1.25752e+09	9.06766e+08	1.67261e+09	8.71175e+08	8.67762e+08	0.108959	-0.159411	-0.0190943	7.40157e+08	4.66914e+08	4.25995e+08	8.39134e+08	6.12587e+08	1.57518e+09	0.054508	0.117931	0.567925	9.91765e+08	9.76973e+08	1.08127e+09	18.7	40.8	31.4	49.9	5.55	-1.02	0.842	1.85	0.171	-2.12
F1R0E4	Nucleoporin 50 OS=Danio rerio OX=7955 GN=nup50 PE=1 SV=1	nup50	2	5.22134e+06	5163089	5.07057e+06	7.69465e+06	935135	4.74922e+06	383912	0	521709	0	492021	4.8875e+06	1.69403e+06	1.40046e+06	2.68689e+06	5.88461e+06	5.57237e+06	4.81217e+06	1.19657e+07	1.68217e+06	5.26331e+06	0.308222	-0.520169	0.0389177	1.07166e+06	571816	609246	2.81965e+06	1.08974e+06	8.23936e+06	0.420139	0.280065	1.1311	1.91689e+06	2.01769e+06	3.16522e+06	10.2	82.8	37.1	92.1	29.3	1.16	0.838	5.39	0.127	-7.22
A0A0R4INI3	Slow myosin heavy chain 1 OS=Danio rerio OX=7955 GN=smyhc1 PE=1 SV=1	smyhc1	4	19155028	3.44491e+07	7.28446e+06	9.49778e+06	1.44641e+07	2.28909e+07	5.3165e+06	1.72268e+07	17704899	1.21266e+06	6.38841e+06	15598595	1.32991e+07	1.44292e+07	9.89822e+06	2.21826e+07	2.96922e+07	9.54029e+06	2.01363e+07	1.67394e+07	2.3821e+07	-0.0420326	-0.248901	0.397399	9.43477e+06	1.14363e+07	1.09743e+07	3.24393e+06	5.29171e+06	2.45232e+07	-0.46366	-0.334689	0.349202	1.36567e+07	1.49748e+07	1.31361e+07	49.7	17.5	9.87	107	6.81	-1.01	0.837	1.04	0.629	-1.93
B8A4X3	Fibulin 5 OS=Danio rerio OX=7955 GN=fbln5 PE=1 SV=1	fbln5	1	1.40435e+06	1.35271e+06	690799	644972	1.05317e+06	1.40088e+06	3.51869e+06	0	4.02256e+06	1.04727e+06	1.34333e+06	0	2.26465e+06	0	1.9178e+06	1.51573e+06	1.37401e+06	636341	947690	1.19212e+06	1.4417e+06	-0.203954	-0.0616695	0.355186	3.33295e+06	1.95896e+06	2.45944e+06	1.44504e+06	1.01597e+06	2.10038e+06	-0.362948	-0.285143	-0.0685373	2.0774e+06	1.64209e+06	2.0717e+06	40.2	20.7	26.9	35.9	12.9	1.02	0.835	-1.7	0.108	2.2
Q502M3	LOC553451 protein (Fragment) OS=Danio rerio OX=7955 GN=sptbn1 PE=2 SV=1	sptbn1	1	0	0	0	0	2.59628e+06	0	0	0	6.52257e+06	0	0	0	0	0	0	216809	166812	670231	124934	2.96259e+06	143016	-0.239397	1.24944	-0.67084	279103	321031	3.9261e+06	202051	217741	640165	-0.140305	-0.168606	-0.787669	709439	846599	252917	79	152	139	70.3	51.5	3.07	0.833	-4.27	0.441	4.29
A0A0R4IB20	Si:ch211-251f6.6 OS=Danio rerio OX=7955 GN=si:ch211-251f6.6 PE=4 SV=1	si:ch211-251f6.6	1	0	0	0	3.98684e+06	0	0	2194396	0	0	1.85413e+06	4653694	2.73368e+06	3.0048e+06	2.51119e+06	1.88887e+06	262219	688907	601009	258078	1.08827e+06	260131	-0.00691234	0.198578	-0.363688	2.08209e+06	397799	922025	2.59253e+06	3.43412e+06	3.99131e+06	0.0952236	0.936152	0.636372	2.75176e+06	2.52301e+06	2.04028e+06	43.5	89.4	76	21.1	14.9	1.04	0.829	2.94	0.107	2.19
B0V234	Four and a half LIM domains 2b OS=Danio rerio OX=7955 GN=fhl2b PE=4 SV=1	fhl2b	1	4.67069e+06	5.52682e+06	5.92752e+06	5666983	1866144	5.76178e+06	5.49473e+06	8.75197e+06	7.88663e+06	525159	1.0997e+07	5.5899e+06	5.69311e+06	4.15965e+06	3.47157e+06	5.07387e+06	5.62261e+06	5.38903e+06	8.86397e+06	2.12317e+06	5.9467e+06	0.242289	-0.422953	0.0427659	5.19633e+06	5.54843e+06	4.71808e+06	713100	7.9781e+06	8.31198e+06	-0.862547	0.15773	0.245939	5.19407e+06	4.1799e+06	3.76205e+06	5.14	59.9	8.09	75.8	16.8	1.05	0.827	1.1	0.707	-1.04
A7E2L4	Guanine nucleotide binding protein (G protein), beta polypeptide 2-like 1 OS=Danio rerio OX=7955 GN=rack1 PE=2 SV=1	rack1	4	3051559	1.15129e+06	3.09633e+07	1.87384e+06	7.87303e+06	10022537	2.10166e+06	1.95372e+07	8.70155e+06	1.62865e+07	3.24997e+07	6.41892e+06	1.84433e+07	7.83057e+06	9.35849e+06	3.98307e+06	4.2283e+06	9.84472e+06	3.6602e+06	9.34948e+06	3.56012e+06	-0.0367136	0.344621	-0.441738	4.58659e+06	1.25568e+07	6.36881e+06	2.33069e+07	2.36263e+07	1.13671e+07	0.705995	0.274515	0.251592	1.68282e+07	8.75472e+06	1.04501e+07	55.1	60	53.4	36	35.4	-1.09	0.824	2.48	0.0713	1.3
Q6PBH5	Cytochrome c oxidase subunit NDUFA4 OS=Danio rerio OX=7955 GN=ndufa4 PE=3 SV=1	ndufa4	4	1.81234e+07	20556760	11393862	1.32497e+07	4.70397e+07	8.11913e+06	24933824	4.74288e+07	7.80691e+07	2.03614e+07	69130281	8068996	3.01467e+07	2.1423e+07	28513034	2.10729e+07	2.20607e+07	1.06029e+07	2.16739e+07	3.70165e+07	8.7339e+06	0.0122128	0.224775	-0.0842165	2.35652e+07	3.50819e+07	4.53111e+07	2.9452e+07	4.42539e+07	4.0381e+07	0.0968436	0.100869	-0.0500276	2.82261e+07	2.25079e+07	2.47976e+07	35.4	63	31.4	20.2	11.4	1.25	0.823	1.1	0.647	1.93
A0A0R4IPQ6	Chemokine (C-X-C motif) ligand 8b, duplicate 3 (Fragment) OS=Danio rerio OX=7955 GN=cxcl8b.3 PE=4 SV=2	cxcl8b.3	1	28505068	25683714	10341457	7.85599e+06	68899515	12575623	88747528	257181792	254311810	56354917	143361792	0	9.01008e+07	8.03551e+07	68956704	3.12691e+07	2.61733e+07	9.37007e+06	1.24039e+07	8.09584e+07	1.29998e+07	-0.401558	0.490403	0.142195	8.30922e+07	1.48062e+08	1.35969e+08	8.53012e+07	9.88518e+07	1.29064e+08	0.0113947	-0.17546	-0.0226328	8.08748e+07	8.08226e+07	7.59277e+07	51.5	111	28.2	21.5	3.59	1.59	0.821	-1.17	0.55	5.49
A0A0R4I9G1	Pleckstrin homology domain-containing, family A (phosphoinositide-binding-specific) member 1b OS=Danio rerio OX=7955 GN=plekha1b PE=4 SV=1	plekha1b	3	0	0	0	0	8.73342e+06	0	5359594	1.40784e+07	9.69164e+06	3.93992e+06	7.74195e+06	0	0	5.51292e+06	1.41171e+06	1.29509e+06	1.53376e+06	1.01615e+06	611813	2.4271e+06	1.9013e+06	-0.325681	0.199331	0.272095	7.69689e+06	9.04442e+06	7.18277e+06	6.28874e+06	5.75695e+06	4.64754e+06	-0.0877519	-0.196189	-0.189069	1.62242e+06	5.99889e+06	2.75555e+06	20.2	56.7	12.1	15	65.7	1.28	0.821	-1.43	0.0357	6.22
E7FCK6	Nuclear fragile X mental retardation protein-interacting protein 2 OS=Danio rerio OX=7955 GN=nufip2 PE=4 SV=1	nufip2	1	2648978	1.36657e+06	0	1.09525e+06	0	1.30825e+06	0	0	0	0	0	1.3489e+06	0	0	506452	2.86886e+06	1.38811e+06	1.71305e+06	1.63401e+06	2.52332e+06	1.34618e+06	-0.244455	0.25955	-0.104668	94469.7	133503	825509	447016	135046	1.93425e+06	0.675031	0.00499049	0.369791	376947	989071	543219	39.1	33.5	117	115	49.7	-1.08	0.821	2.39	0.475	-5.67
A0A0R4IN28	Uncharacterized protein OS=Danio rerio OX=7955 GN=si:ch211-173b16.3 PE=4 SV=1	ank1a	9	1.00595e+06	3.99362e+06	4.64396e+06	1.04653e+06	1.64538e+07	7.17469e+06	3.32246e+07	4.58731e+07	28723076	2.08949e+06	21081757	1174073	1.58535e+07	6.56285e+06	8.90994e+06	8.13751e+06	6.03027e+06	6.39381e+06	5.97832e+06	1.53579e+07	4.56858e+06	-0.133913	0.405995	-0.145978	3.56122e+07	3.06991e+07	3.42304e+07	5.70491e+06	1.79294e+07	1.28874e+07	-0.79535	-0.233561	-0.424248	1.53374e+07	1.22208e+07	1.14061e+07	16.4	67.9	7.56	50.5	16	1.26	0.82	-2.75	0.0794	4.89
F8W417	Troponin I type 1b (skeletal, slow) (Fragment) OS=Danio rerio OX=7955 GN=tnni1b PE=1 SV=1	tnni1b	4	1.88447e+08	206310180	2.78636e+08	1.81369e+08	5.84774e+07	303558429	20650697	62475605	6.08871e+07	1.33949e+07	1.01305e+08	2.02408e+08	133518236	131959840	130782940	2.07544e+08	2.10439e+08	2.49204e+08	3.38478e+08	6.78662e+07	3.15071e+08	0.212421	-0.491473	0.101854	4.3167e+07	3.93714e+07	3.55878e+07	1.90855e+07	7.19917e+07	3.20482e+08	-0.354447	0.262102	0.954502	1.2119e+08	1.32983e+08	1.44692e+08	10.5	62.4	9.62	117	8.84	1.08	0.82	3.48	0.502	-5.65
Q5XJB9	[Protein ADP-ribosylarginine] hydrolase-like protein 1 OS=Danio rerio OX=7955 GN=adprhl1 PE=2 SV=1	adprhl1	9	1.18283e+08	165218120	103214065	7.85495e+07	8.89898e+07	1.3015e+08	1.14063e+08	1.85499e+08	1.76659e+08	6.37547e+07	9.3664e+07	8.35869e+07	1.37791e+08	100029564	9.94014e+07	1.37738e+08	1.68418e+08	9.33056e+07	1.3028e+08	1.06549e+08	1.35294e+08	-0.0241776	-0.198837	0.16137	1.14022e+08	1.14124e+08	1.00619e+08	9.65354e+07	6.82765e+07	1.29509e+08	-0.0723018	-0.223105	0.10962	1.24789e+08	1.03853e+08	1.21549e+08	28.4	12.4	7.09	31.2	9.65	-1.07	0.82	-1.12	0.524	-1.22
A0A0U2IWR5	Cytochrome c oxidase subunit 2 OS=Danio rerio OX=7955 GN=COX2 PE=3 SV=1	COX2	1	3.20558e+07	30363808	4.66626e+07	3.49838e+07	2.65785e+07	29331366	7.83047e+07	109014008	6.30677e+07	3.10558e+07	5.58514e+07	23791234	3.6935e+07	33388310	2.97151e+07	3.51864e+07	3.09484e+07	4.18922e+07	5.76612e+07	3.09656e+07	3.03729e+07	0.214509	0.000241911	-0.139647	7.33479e+07	6.43154e+07	3.52752e+07	4.63613e+07	3.92364e+07	3.67096e+07	-0.199232	-0.214626	0.0173094	3.33278e+07	3.35731e+07	3.25725e+07	15.3	39.3	34.5	12.3	1.57	1.1	0.819	-1.41	0.308	1.6
A1A5X4	adducin 1 (Alpha) OS=Danio rerio OX=7955 GN=add1 PE=1 SV=1	add1	1	0	0	0	0	0	0	8432759	13365706	4563999	0	0	0	0	0	0	552307	179577	175788	217291	550368	90663.2	-0.405138	0.486401	-0.287558	7.96254e+06	8.37169e+06	2.7791e+06	406051	781538	239128	-1.29247	-1.02986	-1.06527	239036	201440	347598	71.5	83	48.9	58.4	28.9	-1.06	0.819	-13.4	0.0064	21.1
A7YYB3	Ubiquinol-cytochrome c reductase core protein II OS=Danio rerio OX=7955 GN=uqcrc2b PE=2 SV=1	uqcrc2b	10	31376738	2.50715e+07	1.52422e+07	18241834	9.1882e+07	1.96865e+07	7.36936e+07	2.34941e+08	210954026	48473434	135254759	6.65639e+06	1.09892e+08	77605325	87483290	4.06993e+07	2.79148e+07	3.63118e+07	2.61785e+07	6.72798e+07	1.69105e+07	-0.191643	0.38205	-0.331891	9.2917e+07	1.3297e+08	1.20898e+08	7.13661e+07	9.16812e+07	1.27691e+08	-0.114603	-0.161474	0.0237429	9.40004e+07	8.06031e+07	9.8055e+07	18.6	72.9	17.8	29.4	10	1.05	0.818	-1.19	0.396	3.31
E9QBC9	Calpastatin (Fragment) OS=Danio rerio OX=7955 GN=cast PE=1 SV=1	cast	2	10171094	16170826	10678461	12256914	0	10224121	17823264	2.39941e+07	5.90433e+06	0	13364627	0	0	11530789	4258367	1.12588e+07	1.71439e+07	1.54753e+07	2.00523e+07	1.1721e+07	1.06745e+07	0.25067	-0.165145	-0.161291	2.41938e+07	1.50436e+07	1.00978e+07	1.82963e+06	339027	518733	-1.12134	-1.64712	-1.28928	7.13443e+06	1.1897e+07	5.29515e+06	20.7	36.3	43.5	90.8	42	-1.03	0.818	-18.4	0.0125	1.12
Q04695	Keratin, type I cytoskeletal 17 OS=Homo sapiens GN=KRT17 PE=1 SV=2	KRT17	28	9.37437e+08	4.57414e+08	1.85681e+09	3.8507e+08	2.6572e+08	1.91723e+09	5.56949e+08	7.85397e+08	4.63528e+08	2.25783e+09	1229532098	810195810	1.16231e+09	1.0116e+09	9.54685e+08	1.03332e+09	4.91914e+08	1.63124e+09	6.9894e+08	4.03442e+08	1.91274e+09	-0.169795	-0.0861081	0.0691396	5.25846e+08	4.53192e+08	3.00046e+08	3.59585e+09	8.68112e+08	1.31641e+09	0.834943	0.282293	0.642205	1.03822e+09	1.01893e+09	1.05334e+09	54.2	79.6	27	75.9	1.66	-1.05	0.816	4.52	0.0698	-2.47
F1RCC9	Synaptopodin 2-like a OS=Danio rerio OX=7955 GN=synpo2la PE=4 SV=2	synpo2la	1	0	0	0	0	0	2318439	0	0	0	0	0	0	0	0	0	609830	453734	343328	78084.6	1.18279e+06	2.38843e+06	-0.892643	0.416107	0.842404	379691	288692	170327	105085	290517	884382	-0.557888	0.00273728	0.715356	720881	295370	353018	28.6	95	37.6	95.4	50.6	2.59	0.814	1.53	0.866	-1.68
B3DGZ9	Pyruvate carboxylase OS=Danio rerio OX=7955 GN=pcxb PE=2 SV=1	pcxb	1	27227298	0	0	0	0	0	0	0	4.79448e+07	0	0	0	41959000	0	0	1.04982e+06	218925	345521	497539	583175	173449	-0.324286	0.425504	-0.299303	241738	152277	1.07195e+06	193871	987106	579411	-0.0958325	0.811729	-0.26719	357871	902282	268701	83.2	51.7	104	67.6	67.3	-1.29	0.813	1.2	0.674	-1.1
B3DGY6	Spectrin beta chain OS=Danio rerio OX=7955 GN=sptb PE=2 SV=1	sptb	133	4.52041e+08	5.79346e+08	4.31645e+08	1.50878e+08	1.60496e+09	1.7027e+08	2.67743e+09	5.28114e+09	6.8886e+09	5.42016e+08	3.04587e+09	2.67484e+08	1.58636e+09	1.4521e+09	1.41427e+09	5.49046e+08	6.10204e+08	4.31282e+08	4.08159e+08	1.13812e+09	4.12663e+08	-0.128779	0.270714	-0.0191659	2.73097e+09	3.19902e+09	3.79495e+09	7.50959e+08	1.8797e+09	1.21463e+09	-0.560701	-0.230929	-0.494761	1.48936e+09	1.50965e+09	1.53606e+09	17.2	64.3	16.5	44.3	1.55	1.23	0.812	-2.53	0.0519	6.11
A5WVS2	Non-specific serine/threonine protein kinase OS=Danio rerio OX=7955 GN=pak2b PE=1 SV=1	pak2b	9	4.19179e+06	14295497	1136720	0	6.60296e+07	2.65534e+06	8.35155e+07	1.47875e+08	9.47254e+07	4.61718e+07	99348029	4.78284e+06	42308808	3.74696e+07	4.37539e+07	8.70628e+06	1.84336e+07	1.13631e+07	1.40523e+07	5.65075e+07	4.32942e+06	0.207916	0.486496	-0.419069	7.98517e+07	8.65667e+07	5.55742e+07	6.74413e+07	7.17102e+07	6.91599e+07	-0.0733581	-0.0817698	0.0949812	4.1038e+07	4.05822e+07	4.82064e+07	39.2	111	22	3.09	9.88	1.95	0.807	-1.07	0.768	5.77
A0A0R4IDW9	SEC23-interacting protein OS=Danio rerio OX=7955 GN=sec23ip PE=1 SV=1	sec23ip	1	0	0	0	0	3507481	0	0	0	0	0	0	0	22088964	2.80493e+06	0	943400	182574	411267	149104	4.01314e+06	289959	-0.801206	1.34205	-0.151788	439354	101136	647753	273227	464537	927933	-0.20629	0.662112	0.156107	1.99922e+07	2.81823e+06	5.70497e+06	76.2	148	69.6	60.6	96.7	2.9	0.806	1.4	0.527	-1.29
A0A0R4ILB5	Sarcolemma-associated protein b OS=Danio rerio OX=7955 GN=slmapb PE=1 SV=1	slmapb	1	0	0	0	0	0	3.93943e+06	0	0	0	0	0	1.87451e+06	0	0	1.61892e+06	646268	468147	1.05739e+06	1.16008e+06	153032	4.06273e+06	0.254075	-0.485601	0.584582	1.15545e+06	661415	615709	376430	696429	2.71063e+06	-0.487066	0.0224026	0.643695	631474	255293	1.74725e+06	41.7	113	36.9	100	88.4	2.48	0.806	1.56	0.841	1.12
A4VCG0	Si:dkey-222f8.3 protein OS=Danio rerio OX=7955 GN=si:dkey-222f8.3 PE=2 SV=1	si:dkey-222f8.3	1	0	0	0	0	5.06093e+06	0	0	8998344	0	3.34717e+06	0	0	0	0	0	830910	828452	237888	145593	1.07567e+06	581598	-0.756413	0.113414	0.38825	197701	560232	109032	4.74482e+06	217734	146640	1.38021	-0.410441	0.128699	335782	617217	204532	54	77.4	82.7	155	54.6	-1.05	0.802	5.89	0.537	-2.19
Q6TNT6	U4/U6-associated RNA splicing factor OS=Danio rerio OX=7955 GN=prpf3 PE=2 SV=1	prpf3	1	1.48487e+06	3.853e+06	1.8803e+06	4.13545e+06	257441	2.50792e+06	904897	1.16445e+06	896546	261270	2.5986e+06	2.58666e+06	1.8998e+06	2.58766e+06	1.17608e+06	1.60312e+06	3.91822e+06	1.72151e+06	6.41008e+06	287760	2.58405e+06	0.601899	-1.13406	0.176391	861328	781916	575436	349066	1.93984e+06	3.77132e+06	-0.392261	0.394606	0.816496	1.74453e+06	2.59987e+06	1.26715e+06	54	100	20	84.8	36.1	1.28	0.8	2.73	0.47	-3.26
D1GJ56	Actinin alpha 3a OS=Danio rerio OX=7955 GN=actn3a PE=1 SV=1	actn3a	2	5.97501e+06	7.7701e+06	20486655	0	1.03848e+06	13996742	0	0	0	0	22412956	0	3.4953e+06	5630574	7542848	6.78109e+06	8.28154e+06	1.21383e+07	1.70283e+07	1.34725e+06	1.44543e+07	0.399871	-0.788662	0.0758384	1.52997e+06	921713	1.24739e+06	1.30277e+06	1.1409e+06	914950	-0.0698133	0.0926501	-0.134604	3.57599e+06	5.94634e+06	8.1778e+06	30.5	76.8	24.7	17.4	39	1.21	0.799	-1.1	0.661	-7.35
A9C3S0	Si:ch211-198n5.11 OS=Danio rerio OX=7955 GN=si:ch211-198n5.11 PE=1 SV=1	si:ch211-198n5.11	2	573358	636689	0	0	4.19704e+06	0	0	4.59475e+06	6.61247e+06	1.6992e+06	6.99683e+06	359978	2.48245e+06	2.09145e+06	3.22157e+06	1.03106e+06	877429	950215	911249	4.78431e+06	380981	-0.0536456	0.736608	-0.396918	4.62799e+06	3.02238e+06	4.0512e+06	2.33499e+06	5.19194e+06	1.3188e+06	-0.297108	0.234981	-0.487406	2.28454e+06	2.10071e+06	3.4774e+06	8.06	119	20.9	68.1	28.5	2.13	0.795	-1.32	0.403	4.09
F1QTL9	Heterogeneous nuclear ribonucleoprotein A0b OS=Danio rerio OX=7955 GN=hnrnpa0b PE=1 SV=1	hnrnpa0b	1	1.11302e+07	1.05714e+07	5.44944e+06	1.72464e+07	2.92049e+06	1.21105e+07	13560617	6.1868e+06	33499898	5.76707e+06	2.68619e+07	2.35187e+07	2.09352e+07	7.72025e+06	7.28357e+06	1.21478e+07	1.07623e+07	4.95692e+06	2.78535e+07	3.33607e+06	1.25181e+07	0.360383	-0.508672	0.402326	1.27826e+07	3.96118e+06	1.91247e+07	8.27914e+06	1.91463e+07	3.62784e+07	-0.188634	0.684259	0.278052	1.8954e+07	7.75937e+06	7.92427e+06	41.1	85	63.7	66.5	55.6	1.57	0.794	1.78	0.405	1.29
Q6AZC1	Proteasome (Prosome, macropain) 26S subunit, ATPase, 5 OS=Danio rerio OX=7955 GN=psmc5 PE=1 SV=1	psmc5	1	0	0	1.09214e+06	0	1.06758e+06	0	0	1.60754e+06	1.23899e+06	809829	1.8847e+06	0	1.18369e+06	1.05798e+06	1.03217e+06	289771	961812	1.00323e+06	88952.6	1.20858e+06	1.14401e+06	-0.512897	0.0991841	0.0570282	975392	1.06957e+06	786948	1.11076e+06	1.41589e+06	2.65362e+06	0.0564428	0.121821	0.527893	1.08998e+06	1.06266e+06	1.11131e+06	53.3	77.2	15.2	47.3	2.24	1.08	0.793	1.83	0.162	1.26
F1QMH7	Dystroglycan 1 OS=Danio rerio OX=7955 GN=dag1 PE=1 SV=1	dag1	3	0	0	0	0	8.85685e+07	0	8.15789e+07	9.42271e+07	1.22256e+08	4.4187e+07	126708180	0	4.86166e+07	49495012	5.06862e+07	1.58588e+06	937693	2.01511e+06	1.1777e+06	1.41223e+06	2.33148e+06	-0.129236	0.177845	0.0633327	7.6747e+07	5.70384e+07	6.16345e+07	5.83215e+07	8.91034e+07	8.02934e+07	-0.119233	0.193727	0.114856	4.42346e+07	5.02001e+07	5.60851e+07	35.9	37.2	15.8	20.9	11.8	1.08	0.792	1.17	0.409	43.1
F1QVZ7	Myocyte enhancer factor 2d OS=Danio rerio OX=7955 GN=mef2d PE=4 SV=1	mef2d	1	3.04834e+06	4.82802e+06	5668406	2.76478e+06	1.6311e+06	7.08682e+06	1.97256e+06	2687990	489667	2.5804e+06	0	4.58424e+06	3.6878e+06	4.06367e+06	3.0708e+06	3.30387e+06	4.91097e+06	5.15486e+06	4.23614e+06	1.85353e+06	7.31735e+06	0.107948	-0.423168	0.152137	1.87233e+06	1.76242e+06	320496	3.63584e+06	3.05535e+06	6.78216e+06	0.288221	0.238952	1.32554	3.37317e+06	4.08342e+06	3.32556e+06	22.6	61.3	65.7	44.6	11.8	1	0.79	3.41	0.119	-3.38
A7MCP4	Ras homolog gene family, member Ab OS=Danio rerio OX=7955 GN=rhoab PE=2 SV=1	rhoab	1	0	0	0	0	739708	0	869338	1.47554e+06	1.31204e+06	428011	983521	0	701930	0	455308	396088	605071	169200	172893	834659	159975	-0.360015	0.139703	-0.0243492	827600	984147	831805	578431	748449	603490	-0.155569	-0.118898	-0.139352	648356	335598	488086	55.9	99.1	10.1	14.3	31.9	-1	0.79	-1.37	0.0366	2.26
A0A1L1QZN5	Cortactin OS=Danio rerio OX=7955 GN=cttn PE=1 SV=1	cttn	14	1.38053e+08	1.62734e+08	9.50482e+07	1.55095e+08	7.52812e+07	1.68183e+08	4.54979e+07	8.2842e+07	7.65153e+07	2.63635e+07	9.94014e+07	1.56179e+08	1.11687e+08	1.05454e+08	8.40929e+07	1.52324e+08	1.62881e+08	1.17287e+08	2.57488e+08	8.73867e+07	1.74114e+08	0.227989	-0.270425	0.171585	5.16105e+07	5.33433e+07	4.64799e+07	7.29672e+07	7.28974e+07	2.40327e+08	0.150389	0.135632	0.713537	1.02839e+08	1.06502e+08	1.0067e+08	16.6	49.2	7.07	75.1	2.85	1.2	0.789	2.55	0.192	-2.86
E7EXI3	Plakophilin 4 OS=Danio rerio OX=7955 GN=pkp4 PE=4 SV=1	pkp4	10	6.89801e+06	5.36573e+06	2.42936e+06	2.47348e+06	2.13697e+07	3.88252e+06	3.0409e+07	6.60241e+07	9.2482e+07	4.10405e+06	5.20287e+07	3.51878e+06	1.34358e+07	1.49041e+07	4.36072e+06	1.11256e+07	9.86359e+06	1.25154e+07	7.40696e+06	2.08507e+07	6.28652e+06	-0.176684	0.325086	-0.299036	3.27033e+07	4.38214e+07	6.75176e+07	1.03928e+07	3.25228e+07	1.99487e+07	-0.497858	-0.129498	-0.529501	1.4418e+07	1.63894e+07	1.43438e+07	11.9	70.4	37	53	7.71	1.03	0.789	-2.29	0.098	4.3
F1QKG7	Tropomyosin 4a OS=Danio rerio OX=7955 GN=tpm4a PE=1 SV=1	tpm4a	12	2.57396e+08	2.49247e+08	3.4288e+07	1.56638e+07	8.92443e+07	1.41846e+08	1.39008e+07	7.79612e+07	1.21895e+08	2.51772e+07	153999833	3.60253e+07	7.09463e+07	6.69707e+07	6.18899e+07	2.91175e+08	2.59269e+08	3.11957e+07	8.29442e+07	1.04751e+08	1.38591e+08	-0.545368	-0.393591	0.647641	5.08311e+07	5.12872e+07	5.43224e+07	3.76713e+07	9.53458e+07	6.03181e+07	-0.130119	0.269293	0.0454692	6.64799e+07	7.47211e+07	6.84507e+07	73.1	25.8	3.64	45.1	6.16	-1.78	0.789	1.24	0.65	-3.72
E7F571	Si:ch1073-219n12.1 OS=Danio rerio OX=7955 GN=ppp1r9ala PE=1 SV=2	ppp1r9ala	1	0	0	0	0	0	0	0	0	6.75574e+06	0	0	0	0	0	0	396527	233529	281884	197340	184766	1.30854e+06	-0.303058	-0.10172	0.666716	645601	561788	4.06183e+06	959642	507188	533847	0.172145	-0.0444042	-0.881305	400703	641666	443763	27.5	114	114	38.1	25.9	1.85	0.787	-2.63	0.465	5.78
Q802C9	Eukaryotic translation initiation factor 4A, isoform 1A OS=Danio rerio OX=7955 GN=eif4a1a PE=1 SV=1	eif4a1a	6	4926100	4.21221e+06	2.05793e+07	2.02078e+06	48178774	3.41935e+06	11166842	3.67809e+07	5.31533e+07	18125463	3.00869e+07	7.57568e+06	1.69018e+07	2.33985e+07	2.08843e+07	8.08269e+06	7.40671e+06	2.03191e+07	6.53403e+06	1.88383e+07	6.49751e+06	-0.092375	0.405415	-0.495158	2.32406e+07	2.37418e+07	3.14942e+07	2.71967e+07	2.69911e+07	1.70217e+07	0.0682684	0.0557074	-0.267228	2.63499e+07	1.73294e+07	2.29885e+07	60.9	67	17.7	24.5	20.5	-1.12	0.785	-1.1	0.587	2.19
Q6P123	T-complex protein 1 subunit delta OS=Danio rerio OX=7955 GN=cct4 PE=2 SV=1	cct4	2	6416834	20669112	9.59781e+06	3784265	5050504	21558572	800458	1.98938e+06	1.66038e+06	1.93409e+06	3.66657e+06	7.82274e+06	1.36076e+07	1.25586e+07	1.06606e+07	7.19902e+06	2.12356e+07	8.72838e+06	6.24993e+06	5.76724e+06	2.24237e+07	-0.0613982	-0.566097	0.409773	869777	2.25341e+06	1.24745e+06	2.66588e+06	5.2475e+06	1.16179e+07	0.486433	0.367113	0.969104	1.23777e+07	1.26225e+07	1.15993e+07	62.2	82.6	49.1	70.8	4.38	-1.08	0.778	4.47	0.0605	-8.5
Q6TNT8	Guanine nucleotide binding protein (G protein), alpha inhibiting activity polypeptide 2 OS=Danio rerio OX=7955 GN=gnai2a PE=1 SV=1	gnai2a	1	0	0	0	0	0	0	1.06904e+06	0	7.06658e+06	0	0	0	2.80939e+06	0	0	607405	200016	208037	329159	252054	442924	-0.266073	0.100429	0.328188	1.01696e+06	1.71168e+06	4.24254e+06	941718	196552	561974	-0.033383	-0.939946	-0.87791	2.57382e+06	288274	915421	68.8	28.1	73.1	65.7	93.8	1.01	0.776	-4.1	0.085	6.87
Q1L9E7	Novel protein similar to vertebrate sarcospan (Kras oncogene-associated gene) (SSPN) (Fragment) OS=Danio rerio OX=7955 GN=sspn PE=4 SV=1	sspn	1	0	0	0	0	2.17268e+06	0	2996065	4.64108e+06	0	2.16622e+06	0	0	0	0	1.84039e+06	460342	988328	250552	245181	2.47529e+06	401707	-0.273594	0.398725	0.205011	2.83955e+06	2.99598e+06	2.83672e+06	3.03988e+06	169966	119593	0.0296065	-1.24618	-1.37511	197047	305958	1.98764e+06	67.1	120	3.15	151	121	1.84	0.773	-2.6	0.192	5.1
F1Q5Z9	Epsin 1 OS=Danio rerio OX=7955 GN=epn1 PE=1 SV=1	epn1	3	7.03303e+06	7.6949e+06	7.84675e+06	6.50584e+06	6.19619e+06	5123610	17807009	28936587	3.17616e+07	4.58671e+06	2.54704e+07	7.29744e+06	1.54513e+07	7.09024e+06	1.28068e+07	8.84074e+06	8.44701e+06	7.91365e+06	1.12539e+07	7.05831e+06	6.21434e+06	0.104814	-0.0780021	-0.104982	1.68282e+07	2.13146e+07	1.8696e+07	7.30469e+06	1.07077e+07	1.46352e+07	-0.362436	-0.298982	-0.10635	1.41017e+07	1.34794e+07	1.39018e+07	5.54	33	11.9	33.7	2.3	-1.03	0.773	-1.74	0.0867	2.26
Q2Q551	Calcium channel, voltage-dependent, beta 1 subunit OS=Danio rerio OX=7955 GN=cacnb1 PE=2 SV=1	cacnb1	15	3.57934e+08	3.19341e+08	3.4312e+08	3.22675e+08	4.0042e+08	2.51425e+08	5.06213e+08	6.59194e+08	5.7562e+08	2.82182e+08	5.47566e+08	3.32218e+08	451825999	3.85999e+08	3.67505e+08	4.01306e+08	3.33017e+08	3.02208e+08	6.02001e+08	3.27006e+08	2.64473e+08	0.176121	-0.00791062	-0.0579259	4.75205e+08	3.91848e+08	3.21263e+08	4.22081e+08	3.71139e+08	6.41053e+08	-0.0514854	-0.023581	0.300033	4.06679e+08	4.01736e+08	4.37452e+08	14.7	45.1	19.5	30	4.66	1.15	0.771	1.21	0.442	1.15
A8WHR4	Src homology 2 domain-containing-transforming protein D, a OS=Danio rerio OX=7955 GN=shda PE=4 SV=1	shda	3	0	0	0	0	7693023	0	1.85781e+07	3.48448e+07	28433306	7.54821e+06	2.13854e+07	0	0	8.7117e+06	1.44053e+07	1.20847e+06	1.62874e+06	1.85775e+06	906713	9.0512e+06	959027	-0.124765	0.744855	-0.287155	1.806e+07	2.20979e+07	1.74385e+07	1.11246e+07	1.57646e+07	1.01919e+07	-0.210433	-0.146667	-0.233254	1.09194e+07	9.76036e+06	1.64958e+07	21	129	13.2	24.1	29.1	2.33	0.77	-1.55	0.0559	12.3
Q503C0	Peptidylprolyl isomerase OS=Danio rerio OX=7955 GN=fkbp3 PE=2 SV=1	fkbp3	1	2.25307e+06	3440932	2849698	2475630	2.28342e+06	2.55814e+06	4.81438e+06	6.56397e+06	5413389	2.84473e+06	5.83004e+06	3.71028e+06	4.71456e+06	2738739	3421596	2.43796e+06	3.49874e+06	2.60243e+06	3.78108e+06	2.6026e+06	2.6359e+06	0.190589	-0.128503	0.00554976	4.5551e+06	4.19559e+06	3.27816e+06	4.01738e+06	4.28303e+06	5.4596e+06	-0.0545549	0.00895824	0.221531	4.30609e+06	2.75171e+06	3.7076e+06	20.1	22.3	16.4	16.7	21.8	1.06	0.769	1.14	0.377	1.41
U3JB13	Actin-binding LIM protein 1b OS=Danio rerio OX=7955 GN=ablim1b PE=4 SV=1	ablim1b	17	3.77779e+07	4.94812e+07	8.80478e+07	1.55264e+07	6.71622e+07	4.96931e+07	9.0947e+07	2.63216e+08	207651274	3.08548e+07	1.61925e+08	2.11443e+07	9.19855e+07	8.36511e+07	9.077e+07	4.85862e+07	5.26344e+07	6.41092e+07	3.5697e+07	7.5823e+07	4.80709e+07	-0.133881	0.158531	-0.125037	1.16175e+08	1.63041e+08	1.2968e+08	5.03214e+07	1.17637e+08	7.65794e+07	-0.363361	-0.141755	-0.228763	8.76444e+07	8.42508e+07	8.91325e+07	14.6	38.6	17.7	41.6	2.88	-1.04	0.767	-1.67	0.135	2.47
E7FE90	Fetuin B OS=Danio rerio OX=7955 GN=fetub PE=1 SV=1	fetub	1	0	0	487323	0	3.50965e+06	0	0	0	2.46908e+06	1.68238e+06	3.08256e+06	0	930698	497200	0	240709	715146	449864	590086	4.01564e+06	100116	0.389423	0.74936	-0.652576	340903	204216	1.53365e+06	2.34707e+06	2.29335e+06	4.82858e+06	0.837896	1.05038	0.498093	858235	499283	705757	50.7	136	106	45.9	26.2	3.35	0.765	4.56	0.0783	1.48
E7FE42	Cytoplasmic FMR1-interacting protein 1 homolog OS=Danio rerio OX=7955 GN=cyfip1 PE=1 SV=2	cyfip1	4	0	0	0	0	1.10153e+07	0	3.16123e+06	1.56275e+06	9.13801e+06	1.86257e+06	8.5724e+06	0	759689	3.06959e+06	2.1295e+06	2.33623e+06	2.21642e+06	1.62808e+06	1.36713e+06	5.94654e+06	1.67621e+06	-0.232708	0.428612	0.0126531	3.15205e+06	5.63958e+06	6.2827e+06	3.36216e+06	6.41487e+06	4.15823e+06	0.0280243	0.0559413	-0.179237	3.75195e+06	3.71228e+06	3.06903e+06	18.4	85.4	32.9	34.1	10.9	1.45	0.764	-1.08	0.811	2.44
Q5RJ97	Lamin B receptor OS=Danio rerio OX=7955 GN=lbr PE=4 SV=1	lbr	2	0	1.50715e+06	0	0	1.98823e+06	0	732187	2.63397e+06	0	0	7499757	1.16611e+06	1.8477e+06	1.8869e+06	0	1.74924e+06	2.10175e+06	789282	1.38022e+06	3.47357e+06	270341	-0.102901	0.218195	-0.46532	924329	1.90065e+06	1.00122e+06	904285	5.61352e+06	2.55527e+06	-0.00952123	0.470333	0.406908	2.70051e+06	2.17759e+06	1.0461e+06	43.9	95.2	42.6	79	42.8	1.1	0.763	2.37	0.339	-1.21
Q6VN46	Myoglobin OS=Danio rerio OX=7955 GN=mb PE=2 SV=3	mb	16	6.17368e+08	8.82719e+08	1.08422e+09	642151483	1.56205e+09	3.00753e+08	8.62478e+08	2929637716	3.31521e+09	8.68965e+08	2.21134e+09	3.76061e+08	1.53762e+09	1.31183e+09	1.22589e+09	6.80852e+08	9.01176e+08	9.70172e+08	1.07627e+09	1.80606e+09	4.6694e+08	0.198869	0.301922	-0.317587	8.13918e+08	1.68408e+09	1.76398e+09	1.32358e+09	1.51574e+09	7.48064e+08	0.211168	-0.0457378	-0.372555	1.38261e+09	1.31961e+09	1.353e+09	17.8	60.1	37.1	33.4	2.33	1.31	0.76	-1.19	0.657	1.67
B0UY88	Coagulation factor IIIb OS=Danio rerio OX=7955 GN=f3b PE=4 SV=1	f3b	1	0	0	0	0	17570216	0	18030598	23983608	19016600	9.47369e+06	19709524	0	4.98371e+06	8652531	15772530	231815	374993	406328	114285	103081	1.25615e+06	-0.307154	-0.560846	0.490165	1.69787e+07	1.47739e+07	1.10571e+07	1.3758e+07	1.41346e+07	2.51194e+07	-0.0913487	-0.0192108	0.356369	4.55042e+06	8.69669e+06	1.72309e+07	27.5	135	21	36.5	63.6	1.45	0.759	1.24	0.472	42.3
F1QGK0	Glycerol-3-phosphate dehydrogenase [NAD(+)] OS=Danio rerio OX=7955 GN=gpd1b PE=1 SV=1	gpd1b	4	0	1.4423e+07	3.60064e+06	458864	9.29008e+06	5159318	1.27181e+07	3.19146e+07	2.86223e+07	2.4088e+06	1.18399e+07	0	4.5997e+06	9.25097e+06	5.69248e+06	1.2822e+07	1.48843e+07	5.50888e+06	9.63256e+06	1.06033e+07	7.33517e+06	-0.124213	-0.147289	0.124347	1.20431e+07	2.02655e+07	1.71103e+07	4.69934e+06	4.29611e+06	6.31929e+06	-0.408701	-0.673683	-0.432589	1.05904e+07	1.00498e+07	9.93204e+06	44.5	18.3	25.2	21	3.45	-1.2	0.758	-3.23	0.00472	1.49
Q8JHI0	Solute carrier family 25 (mitochondrial carrier; adenine nucleotide translocator), member 5 OS=Danio rerio OX=7955 GN=slc25a5 PE=1 SV=1	slc25a5	21	2.45162e+09	2717499011	2.48091e+09	1.45453e+09	3.15581e+09	1.26906e+09	4.20812e+09	6.9626e+09	6.91541e+09	1.738e+09	3.99745e+09	1.22269e+09	3.46516e+09	3.13884e+09	2.84678e+09	2.71346e+09	2.77853e+09	2.20484e+09	2.51421e+09	3.63365e+09	1.32085e+09	-0.0331204	0.116528	-0.222525	3.90239e+09	3.88619e+09	3.58626e+09	2.70497e+09	2.6946e+09	1.98385e+09	-0.159168	-0.15903	-0.257132	3.08458e+09	3.15984e+09	3.1602e+09	12.2	46.5	4.7	16.8	1.39	-1.03	0.756	-1.54	0.0422	1.48
P19013	Keratin, type II cytoskeletal 4 OS=Homo sapiens GN=KRT4 PE=1 SV=4	KRT4	14	69010342	1.2775e+08	249099406	4.77204e+07	1.12841e+07	4.16865e+08	1.03734e+08	3.32801e+08	6.82594e+07	5.47879e+08	8.4893e+07	1.40651e+08	2.23004e+08	1.85676e+08	1.3696e+08	9.92687e+07	1.07551e+08	2.51319e+08	6.11824e+07	4.58285e+07	4.31523e+08	-0.210186	-0.370479	0.234778	1.30694e+08	1.85569e+08	4.80477e+07	2.26755e+08	6.92762e+07	2.3706e+08	0.239302	-0.427921	0.693185	2.03924e+08	1.87877e+08	1.59457e+08	56	122	57	52.9	12.3	1.18	0.754	1.46	0.535	-1.26
F1Q4N6	Zgc:77056 OS=Danio rerio OX=7955 GN=zgc:77056 PE=1 SV=1	zgc:77056	1	673679	918818	906540	554740	0	599592	0	0	0	0	0	603114	0	817110	0	724232	932889	833690	811581	964857	616001	0.0494544	0.0146331	-0.131423	417332	1.16992e+06	89120	791039	320467	847239	0.277716	-0.562372	0.978031	204514	820663	297432	12.6	21.9	99.2	44.3	75.3	-1.04	0.752	1.17	0.564	-1.49
A1L1U3	GTPase-activating protein (SH3 domain)-binding protein 2 OS=Danio rerio OX=7955 GN=g3bp2 PE=1 SV=1	g3bp2	3	5.74642e+07	7.60338e+06	1.76291e+07	2.82531e+06	57280220	1.48408e+07	18001902	37333836	5.78247e+07	12200142	57149360	1.23114e+07	2.592e+07	2.9041e+07	2.65852e+07	6.31509e+07	3.02493e+07	1.60067e+07	1.47456e+07	6.87609e+07	1.55956e+07	-0.631716	0.356626	-0.0113003	1.80554e+07	2.3348e+07	3.26894e+07	1.83187e+07	4.12702e+07	1.23315e+07	0.00628661	0.247387	-0.423391	2.38755e+07	2.91937e+07	2.93023e+07	66.3	93.7	30	63.7	11.3	-1.1	0.75	-1.03	0.764	-1.48
E7F147	Plac8 onzin-related protein 1 OS=Danio rerio OX=7955 GN=ponzr1 PE=1 SV=1	ponzr1	1	0	0	0	0	0	0	3.56645e+06	5.11465e+06	5434961	0	4127513	0	0	0	0	745460	285689	278767	872754	352769	88338.4	0.0684679	0.091598	-0.499092	3.37802e+06	3.29255e+06	3.2908e+06	256468	3.05307e+06	364940	-1.11963	-0.0327949	-0.95508	668627	318682	541261	61.3	91.1	1.5	129	34.8	1	0.749	-2.71	0.172	7.6
E7FCV8	Collagen, type VI, alpha 2 OS=Danio rerio OX=7955 GN=col6a2 PE=4 SV=3	col6a2	8	2.725e+07	3.8748e+07	2.08858e+07	2.03303e+07	6.30437e+06	4.12364e+07	4.69715e+06	8.38102e+07	1.18529e+08	9.06586e+06	8678259	4.20387e+07	1.2675e+07	25948793	1.24288e+07	3.18678e+07	2.65187e+07	3.87816e+07	4.3675e+07	8.627e+06	4.69357e+07	0.13688	-0.487693	0.0828772	3.79538e+07	5.3065e+07	3.87624e+07	1.56282e+07	2.345e+07	3.10659e+07	-0.385347	-0.354666	-0.0961261	1.42056e+07	2.92822e+07	1.69432e+07	19	64.2	19.7	33	39.9	1.02	0.748	-1.85	0.0642	1.34
P02701	Avidin OS=Gallus gallus GN=AVD PE=1 SV=3	AVD	52	4.36228e+12	4.46003e+12	4.12741e+12	5.275e+12	2.41718e+12	3.38048e+12	3.74139e+12	3.78313e+12	3.44173e+12	2.49914e+12	4.3195e+12	5.33585e+12	3.98528e+12	3.60253e+12	3.49982e+12	5.07581e+12	4.60103e+12	3.47847e+12	1.18805e+13	3.09246e+12	3.57728e+12	0.369329	-0.172551	0.0121643	3.38439e+12	1.70809e+12	1.40133e+12	4.74331e+12	2.4817e+12	1.09997e+13	0.146601	0.162239	0.894838	3.37917e+12	3.63465e+12	4.06082e+12	18.7	79.9	49.3	72.6	9.33	1.41	0.747	2.81	0.157	-2.03
Q6GMJ4	Zgc:91942 OS=Danio rerio OX=7955 GN=hdac11 PE=2 SV=1	hdac11	5	3547453	0	0	3.07422e+06	10221263	0	2.97131e+07	53373285	4.66196e+07	1.31565e+07	2.83622e+07	2.78595e+06	4.74389e+06	12510364	4.23613e+06	6.23242e+06	2.57841e+06	2.24999e+06	5.72133e+06	1.6693e+06	2.26636e+06	-0.0371599	-0.188818	0.00314678	2.8068e+07	3.35204e+07	2.76854e+07	1.95218e+07	2.08715e+07	2.37824e+07	-0.15769	-0.205755	-0.065995	6.54593e+06	8.49772e+06	6.6126e+06	60	68	11	10.2	15.4	-1.15	0.745	-1.39	0.0177	8.07
A0A0R4IDW2	Glycogenin 1a OS=Danio rerio OX=7955 GN=gyg1a PE=1 SV=1	gyg1a	1	0	20141362	0	0	3.52607e+06	0	0	0	0	0	0	0	0	0	0	255017	446066	183882	88189.9	4.0346e+06	220587	-0.461151	0.956402	0.0790416	174672	239814	656466	153210	250571	1.26833e+06	-0.0569354	0.0190554	0.286022	364357	884173	701946	46	155	73.2	111	40.6	4.91	0.742	1.56	0.815	1.21
A0A0R4IVY5	Rho-associated protein kinase OS=Danio rerio OX=7955 GN=rock1 PE=1 SV=1	rock1	26	5.38071e+07	5.65847e+07	1.31513e+07	2.26098e+07	2.24932e+08	2.53085e+07	2.60117e+08	3.86637e+08	3.59204e+08	1.2813e+08	3.48009e+08	1.30706e+07	1.37693e+08	1.28363e+08	1.39964e+08	7.04599e+07	6.54928e+07	7.43735e+07	6.42253e+07	1.48672e+08	5.18049e+07	-0.0402357	0.356036	-0.157047	2.58908e+08	2.40412e+08	2.13904e+08	1.62831e+08	2.27382e+08	2.00965e+08	-0.201408	-0.0241998	-0.0270979	1.33009e+08	1.33877e+08	1.49623e+08	6.35	59.7	9.51	16.5	6.74	1.26	0.742	-1.21	0.177	3.39
A0A0R4IBC9	Casein kinase 1, gamma 2a OS=Danio rerio OX=7955 GN=csnk1g2a PE=1 SV=1	csnk1g2a	1	0	0	0	0	4.01948e+06	0	2.65378e+06	0	0	1.78822e+06	6.11968e+06	0	0	3.47011e+06	3.05726e+06	822857	488765	222586	942867	4.60456e+06	81271.9	0.0591261	0.974088	-0.437556	2.51625e+06	628207	323108	2.49827e+06	4.49151e+06	6.30883e+06	-0.00311324	0.854289	1.2906	4.01757e+06	3.48681e+06	3.31082e+06	58.8	128	103	43	10.2	3.67	0.741	3.84	0.0962	2.26
Q09SN9	Affixin OS=Danio rerio OX=7955 GN=parvb PE=2 SV=1	parvb	17	7.98242e+06	4.06353e+06	5.00952e+06	3.42227e+06	9.95576e+07	2570235	1.46572e+08	2.71096e+08	2.08972e+08	1.19257e+08	2.44995e+08	1.93634e+06	87438291	6.66027e+07	7.57996e+07	1.72953e+07	9.19605e+06	1.27066e+07	1.07818e+07	2.55172e+07	1.06355e+07	-0.205237	0.443232	-0.0772728	1.39576e+08	1.67356e+08	1.26559e+08	1.78132e+08	1.57256e+08	2.87492e+08	0.105932	-0.0270356	0.356332	8.33422e+07	7.72742e+07	8.63768e+07	31.1	54.7	14.4	33.7	5.63	1.2	0.74	1.44	0.203	11.1
A3KPX2	ATP-binding cassette, sub-family F (GCN20), member 1 OS=Danio rerio OX=7955 GN=abcf1 PE=1 SV=1	abcf1	4	1.37245e+06	2.9949e+06	4.10455e+06	1.82636e+06	1.958e+06	1.94087e+06	2709805	21089017	11737190	1.50673e+06	8.84566e+06	1.33522e+06	3.89332e+06	2.8555e+06	3.40048e+06	2.62588e+06	4.73999e+06	5.90134e+06	3.73591e+06	3.30904e+06	4.46449e+06	0.153122	-0.156075	-0.121179	6.6806e+06	1.39072e+07	7.40514e+06	4.10084e+06	6.80491e+06	3.28786e+06	-0.211942	-0.310416	-0.35262	5.45806e+06	4.395e+06	4.94587e+06	37.6	15.2	42.6	38.9	10.8	-1.15	0.74	-1.97	0.0998	2.11
E7FFS0	Thyroid hormone receptor interactor 10a OS=Danio rerio OX=7955 GN=trip10a PE=4 SV=2	trip10a	1	5.6372e+06	0	2.73517e+06	2.04028e+06	3.72094e+06	3.03085e+06	3.844e+06	5.96169e+06	2.34374e+06	1.68695e+06	4987763	5.00359e+06	0	1.9175e+06	4.06526e+06	6.13002e+06	3.67121e+06	2.49846e+06	3.09887e+06	4.25962e+06	3.12405e+06	-0.296259	0.0645612	0.0970457	3.63993e+06	3.82109e+06	1.45825e+06	2.35361e+06	3.67559e+06	7.41913e+06	-0.189359	-0.0168605	0.70652	2.16357e+06	1.92636e+06	4.40912e+06	45.2	19	44.2	58.6	48.4	-1.17	0.74	1.51	0.449	-1.38
Q6DRM3	60S ribosomal protein L9 OS=Danio rerio OX=7955 GN=rpl9 PE=1 SV=1	rpl9	2	0	0	2377218	810355	4.38788e+06	0	2.95815e+06	10043220	2.02611e+07	3.88001e+06	6045384	0	2.60282e+06	960030	809220	1.426e+06	890407	3.21421e+06	2.27127e+06	5.37274e+06	712013	0.20215	0.780607	-0.654586	3.09943e+06	6.95736e+06	6.22959e+06	5.43333e+06	4.69416e+06	6.31353e+06	0.243784	-0.170886	0.00581325	2.63571e+06	1.22717e+06	1.14036e+06	66	85.2	37.8	14.8	50.3	1.51	0.738	1.01	0.839	2.94
Q7ZUI0	Ribosomal protein L5a OS=Danio rerio OX=7955 GN=rpl5a PE=1 SV=1	rpl5a	1	10902845	0	6.432e+06	2.09153e+06	8.57758e+06	4.8137e+06	0	13175555	1.61299e+07	0	1.82922e+07	2943474	7237023	1.67604e+06	4.37596e+06	1.18983e+07	3.74468e+06	5.84475e+06	3.17899e+06	9.89291e+06	4.96639e+06	-0.573195	0.42191	-0.0707255	6.83806e+06	8.25596e+06	9.4287e+06	7.48615e+06	1.31376e+07	4.30574e+06	0.0393255	0.201749	-0.340404	6.59331e+06	1.68371e+06	4.74797e+06	59.1	57.8	15.9	53.8	57.1	-1.19	0.736	1.02	0.839	1.14
Q7ZU99	Transitional endoplasmic reticulum ATPase OS=Danio rerio OX=7955 GN=vcp PE=1 SV=1	vcp	2	5.51278e+06	4.8913e+06	1.44921e+07	5.68637e+06	2013639	6.69755e+06	0	0	969805	0	5.94902e+06	5.22025e+06	4.84563e+06	5.76059e+06	4.95455e+06	5.97636e+06	4.97183e+06	1.31549e+07	8.72039e+06	4.37509e+06	6.90528e+06	0.164099	-0.055529	-0.279907	1.26272e+06	1.00682e+06	945765	3.95928e+06	4.42417e+06	7.61759e+06	0.496309	0.642881	0.906035	4.4431e+06	5.78812e+06	5.35971e+06	55.5	32.7	15.7	37.3	13.2	-1.21	0.736	4.98	0.00774	-7.5
A5WWE9	Fibronectin leucine-rich transmembrane protein 2 OS=Danio rerio OX=7955 GN=flrt2 PE=4 SV=1	flrt2	3	0	0	0	0	2.84011e+07	0	0	7.24041e+06	9.45094e+06	1.82251e+07	19971943	0	6.46885e+06	2212522	1664633	1.40543e+06	1.48468e+06	1.68472e+06	1.41051e+06	3.43118e+06	1.09087e+06	0.00156756	0.363812	-0.188752	3.64896e+06	5.15797e+06	6.27483e+06	2.12983e+07	1.47021e+07	1.96285e+07	0.766176	0.4549	0.495284	6.34594e+06	3.73383e+06	4.70745e+06	9.44	64.2	26.2	18.5	26.8	1.3	0.735	3.69	0.00356	3.3
E7F078	Family with sequence similarity 171, member A2a OS=Danio rerio OX=7955 GN=fam171a2a PE=4 SV=1	fam171a2a	2	0	0	0	410382	6.4613e+06	0	701012	0	1.38497e+06	2.17398e+06	0	0	0	737822	339018	1.56982e+06	469750	735277	1.00702e+06	1.3415e+06	640064	-0.19281	0.455724	-0.0602281	1.06158e+06	1.27621e+06	1.81265e+06	3.00748e+06	1.18099e+06	871720	0.452249	-0.0336787	-0.317937	644982	1.53617e+06	1.01446e+06	62.1	35.2	28	68.4	42	1.08	0.729	1.22	0.862	1.5
F1R101	Eukaryotic translation initiation factor 4 gamma, 1a OS=Danio rerio OX=7955 GN=eif4g1a PE=1 SV=2	eif4g1a	2	8.43357e+06	6.25956e+06	6.11361e+06	4.65557e+06	1.08893e+06	7.01588e+06	517865	2.36349e+06	2.71416e+06	1.06562e+06	2.06929e+06	6449715	4.04728e+06	3.34823e+06	3.24236e+06	9.15694e+06	6.36405e+06	5.58028e+06	7.09931e+06	5.14801e+06	7.23378e+06	-0.110534	-0.092094	0.11271	1.35455e+06	1.58639e+06	1.71718e+06	1.44869e+06	1.57021e+06	9.45687e+06	0.0291784	-0.00445411	0.740932	3.71506e+06	3.36356e+06	3.50014e+06	26.7	18	11.8	110	5.03	-1.08	0.729	2.68	0.439	-4.53
A0A0R4IKH3	Zgc:55733 OS=Danio rerio OX=7955 GN=zgc:55733 PE=1 SV=1	zgc:55733	1	0	0	0	0	0	2215899	0	0	0	0	0	0	0	0	0	601794	533202	335209	157578	88150.4	2.28259e+06	-0.581953	-0.781668	0.833112	213948	928715	332013	379643	602926	155562	0.249066	-0.187619	-0.329253	382558	348367	620374	28.2	148	77.9	59	32.9	1.72	0.726	-1.3	0.745	1
Q6P0T0	NADH dehydrogenase (Ubiquinone) Fe-S protein 8, (NADH-coenzyme Q reductase) OS=Danio rerio OX=7955 GN=ndufs8a PE=1 SV=1	ndufs8a	2	1.58351e+06	2161770	1.15713e+06	0	2435221	592960	9.41902e+06	1.28413e+07	9.97974e+06	2.80956e+06	7.14886e+06	0	4.85442e+06	4.21342e+06	3.08262e+06	2.0746e+06	2.67324e+06	1.32562e+06	1.97841e+06	2.8618e+06	786360	-0.0206187	0.0296023	-0.226797	8.90931e+06	8.21024e+06	6.05933e+06	3.90821e+06	5.29277e+06	1.17228e+07	-0.357866	-0.190673	0.286608	4.45118e+06	4.23303e+06	3.32612e+06	33.4	55.5	19.2	59.8	14.9	-1.08	0.726	-1.11	0.611	3.82
F1QWX3	G protein-coupled receptor 22a OS=Danio rerio OX=7955 GN=gpr22a PE=4 SV=2	gpr22a	2	0	0	0	0	1814818	0	6.83478e+06	1.04375e+07	8286605	0	4.73901e+06	0	3.30863e+06	1.40549e+06	2170479	997157	1.10353e+06	1.16756e+06	648019	2.45752e+06	422657	-0.187176	0.347713	-0.44129	6.47414e+06	6.71515e+06	5.04655e+06	1.55448e+06	3.54386e+06	1.74773e+06	-0.619597	-0.277579	-0.460521	3.53262e+06	1.66237e+06	3.3461e+06	7.9	94.8	14.8	48.1	36.2	1.08	0.724	-2.66	0.0438	5.58
Q5PR98	Protein NDRG2 OS=Danio rerio OX=7955 GN=ndrg2 PE=2 SV=1	ndrg2	2	0	0	0	0	1.68635e+06	0	6.08013e+06	7.99142e+06	8.02327e+06	912812	5.9864e+06	0	3.92543e+06	675972	3621834	781056	908210	1.21826e+06	299280	2.04453e+06	710989	-0.416604	0.352408	-0.233876	5.76211e+06	5.16054e+06	4.90309e+06	1.64901e+06	4.45573e+06	2.35314e+06	-0.543358	-0.0637766	-0.318821	3.60381e+06	3.03683e+06	3.91198e+06	23.2	89.6	8.36	51.8	12.6	1.05	0.724	-1.87	0.131	5.44
A0A0H2UKU7	C2 calcium-dependent domain-containing 5 OS=Danio rerio OX=7955 GN=c2cd5 PE=1 SV=2	c2cd5	2	0	2317972	0	0	1.06161e+06	0	0	0	907260	0	1.23127e+06	0	0	556599	0	960438	3.19088e+06	587962	1.76544e+06	1.19596e+06	395759	0.264383	-0.426193	-0.171919	1.69169e+06	906710	876747	1.29812e+06	1.03651e+06	1.23319e+06	-0.115005	0.0581031	0.148156	873796	956472	937927	89.1	61.5	39.9	11.5	4.7	-1.41	0.723	1.03	0.78	-1.36
A8B6H7	Nuclear receptor co-repressor OS=Danio rerio OX=7955 GN=ncor1 PE=2 SV=1	ncor1	3	1.36008e+07	24573363	5.84517e+07	14248279	6.16052e+06	4.39016e+07	24140272	27004558	27642276	11378751	17098888	2.40958e+07	23741600	2.83572e+07	3.3584e+07	1.48007e+07	2.50216e+07	5.25002e+07	2.31048e+07	9.34153e+06	4.54634e+07	0.19342	-0.427897	-0.062499	2.35852e+07	1.79763e+07	1.63901e+07	1.76319e+07	1.2815e+07	3.74248e+07	-0.126341	-0.146983	0.358578	2.21467e+07	2.90581e+07	3.73925e+07	63.4	70.2	19.6	57.6	25.8	-1.18	0.719	1.17	0.86	-1.59
F1Q883	6-phosphogluconate dehydrogenase, decarboxylating OS=Danio rerio OX=7955 GN=pgd PE=1 SV=1	pgd	1	780859	1.19774e+06	2.37722e+06	0	1.3298e+06	1.19498e+06	998350	2.49223e+06	1.52637e+06	961781	5.03533e+06	0	1.17563e+06	1.7084e+06	1.48603e+06	840123	1.21644e+06	2.17335e+06	812561	1.50838e+06	1.22941e+06	-0.014487	0.0934203	-0.247435	949945	1.63759e+06	962961	1.32446e+06	3.70995e+06	525362	0.144341	0.355162	-0.26315	1.0826e+06	1.71623e+06	1.6031e+06	48.8	29.6	33.2	89.4	23	-1.19	0.719	1.57	0.784	-1.19
F1R4K1	Tubulin beta chain OS=Danio rerio OX=7955 GN=zgc:153426 PE=1 SV=1	zgc:153426	3	8.9558e+07	8.72112e+07	87231213	37301588	356732066	5.9268e+07	87061984	1.71189e+08	184160878	7.65868e+07	1.42965e+08	4.74828e+07	1.16286e+08	1.10395e+08	1.09131e+08	9.91697e+07	9.14633e+07	7.8245e+07	6.12306e+07	4.24737e+08	6.16132e+07	-0.209411	0.666874	-0.103783	8.17533e+07	1.01318e+08	1.0077e+08	1.17206e+08	9.9682e+07	8.42997e+07	0.156444	-0.00706862	-0.0775031	1.04855e+08	1.12015e+08	1.20703e+08	11.8	115	11.8	16.4	7.05	2.04	0.715	1.06	0.668	1.06
Q5U3J8	Protein LTV1 homolog OS=Danio rerio OX=7955 GN=ltv1 PE=2 SV=1	ltv1	4	0	0	1.66756e+06	0	4.95032e+06	0	810940	3.60621e+06	4.58242e+06	1352244	7170129	1.10176e+06	1.27612e+06	0	1.33902e+06	2.31732e+06	1.70207e+06	2.98905e+06	2.04131e+06	6.01877e+06	1.63662e+06	-0.0550771	0.548531	-0.261586	2.53287e+06	2.89431e+06	3.38852e+06	2.75516e+06	5.76281e+06	3.53285e+06	0.0365326	0.299089	0.0181153	2.68815e+06	2.50614e+06	2.49992e+06	27.6	74.9	14.6	38.9	4.17	1.38	0.713	1.37	0.339	1.26
Q9PV90	60S acidic ribosomal protein P0 OS=Danio rerio OX=7955 GN=rplp0 PE=2 SV=1	rplp0	3	1.61952e+06	1.76508e+06	3.4318e+06	0	7.58722e+06	1.12717e+06	0	4.35177e+06	11089406	823094	1489498	0	1.07755e+06	6.66719e+06	3.24409e+06	4.76606e+06	2.66571e+06	3.56935e+06	5.86086e+06	4.18505e+06	2.6083e+06	0.0898014	0.195888	-0.136233	7.10655e+06	3.11967e+06	6.79763e+06	2.43776e+06	1.3378e+06	3.11638e+06	-0.464667	-0.367716	-0.338708	4.42397e+06	6.69841e+06	4.19532e+06	28.7	38.6	39.1	39.1	27.1	1.15	0.713	-2.47	0.0707	1.55
Q503M6	Si:dkey-11e23.4 protein (Fragment) OS=Danio rerio OX=7955 GN=acot20 PE=2 SV=1	acot20	4	806898	1.12329e+07	3.83094e+06	6.59772e+06	2.43317e+06	5.22459e+06	1.52123e+07	2.02828e+07	2.03774e+07	2.64579e+06	6.34995e+06	2.26315e+06	6.67889e+06	5.49063e+06	7.82263e+06	4.03354e+06	7.54482e+06	4.39622e+06	4.6672e+06	3.31975e+06	6.24972e+06	0.0633698	-0.356543	0.152781	1.44003e+07	1.30025e+07	1.22857e+07	7.88605e+06	6.1634e+06	4.25462e+06	-0.261513	-0.324206	-0.460538	6.46041e+06	6.09697e+06	9.8412e+06	36.3	30.9	8.13	29.8	27.7	-1.12	0.708	-2.17	0.0392	2.48
B8JI00	Succinate--CoA ligase [ADP/GDP-forming] subunit alpha, mitochondrial OS=Danio rerio OX=7955 GN=suclg1 PE=1 SV=1	suclg1	1	0	0	0	678445	0	0	1.86155e+06	3.83685e+06	4029360	0	1.63953e+06	0	977274	718137	0	171905	537723	1.11234e+06	998326	131477	296553	0.763985	-0.611707	-0.574135	1.76733e+06	2.49029e+06	2.46346e+06	339302	1.23511e+06	556863	-0.716731	-0.304544	-0.645798	900924	721229	816172	78.1	96.8	18.3	65.8	11.1	-1.28	0.707	-3.15	0.0663	3.69
B0BLX3	Zgc:92004 protein OS=Danio rerio OX=7955 GN=epb41l3a PE=2 SV=1	epb41l3a	8	4543179	4.96021e+06	1.69715e+07	0	3.88479e+07	2.65e+06	4.85758e+07	4.76264e+07	70476362	37630691	86342615	19226042	1.9561e+07	21906549	20173057	9.72094e+06	7.4805e+06	1.83266e+07	1.18501e+07	2.24317e+07	8.16718e+06	0.0860123	0.476931	-0.351009	4.77689e+07	3.95596e+07	4.22584e+07	5.58677e+07	6.26812e+07	6.59119e+07	0.0680155	0.199885	0.193051	3.13236e+07	2.70703e+07	3.43653e+07	48.3	52.3	9.69	8.34	11.9	1.19	0.703	1.42	0.009	3.65
E7F8Y5	Translationally-controlled tumor protein homolog OS=Danio rerio OX=7955 GN=tpt1 PE=1 SV=2	tpt1	1	0	0	0	0	10907371	0	0	0	0	0	0	0	0	0	0	308201	523396	540731	841825	140739	362268	0.436388	-0.570415	-0.173951	490341	1.19785e+06	521457	385842	241118	406323	-0.104088	-0.696173	-0.108347	295451	414034	1.024e+06	28.3	79.9	54.3	26.1	67.7	-1.02	0.701	-2.14	0.121	1.61
A5PMG2	Si:ch211-199o1.2 OS=Danio rerio OX=7955 GN=si:ch211-199o1.2 PE=1 SV=1	si:ch211-199o1.2	2	0	0	2.089e+07	0	0	0	463012	1.30585e+06	0	1.50217e+06	0	0	0	0	3.00434e+06	469107	738208	1.1074e+06	536522	1.42564e+06	242856	0.0583157	0.285831	-0.658955	550776	1.18766e+06	1.11012e+06	2.36757e+06	363116	1.35453e+06	0.633327	-0.514646	0.0864166	1.04048e+06	1.50265e+06	4.06116e+06	41.5	83.8	36.6	73.6	73.9	-1.05	0.701	1.43	0.814	1.23
Q7T370	Protein CDV3 homolog OS=Danio rerio OX=7955 GN=cdv3 PE=2 SV=1	cdv3	4	4.61821e+07	60121657	6.525e+07	7.45373e+07	2.59731e+07	67475996	2.42998e+07	28431960	23148123	20514003	46637470	68777885	46100781	4.79214e+07	4.79487e+07	5.04375e+07	6.12401e+07	5.89021e+07	1.21481e+08	3.49353e+07	6.98144e+07	0.381754	-0.243772	0.073814	2.39743e+07	1.91366e+07	1.41594e+07	3.59816e+07	3.35695e+07	1.06031e+08	0.176335	0.24408	0.87439	4.18207e+07	4.81746e+07	5.238e+07	10	57.7	25.7	70.3	11.2	1.33	0.698	3.07	0.101	-2.98
A0A0R4IBS6	Sarcoglycan, delta (dystrophin-associated glycoprotein) OS=Danio rerio OX=7955 GN=sgcd PE=4 SV=1	sgcd	4	0	0	0	0	29695995	0	2.46773e+07	3.78644e+07	20742451	1.94132e+07	3.07595e+07	1.56159e+06	7.9063e+06	1.07597e+07	1.10558e+07	1.13556e+06	2.50429e+06	2.51021e+06	1.14525e+06	6.45589e+06	2.03083e+06	0.00369169	0.411271	-0.0920381	2.85291e+07	2.37985e+07	3.69601e+07	2.79349e+07	2.24197e+07	1.83979e+07	-0.00914135	-0.0259197	-0.302964	1.24841e+07	1.14548e+07	1.25548e+07	38.6	88.6	22.4	20.9	5.06	1.57	0.695	-1.3	0.214	14.5
E7F8T6	Nicotinamide phosphoribosyltransferase a OS=Danio rerio OX=7955 GN=nampta PE=1 SV=1	nampta	3	1.01412e+06	0	0	0	7.44142e+06	1.88104e+06	4.12568e+06	1.05276e+07	9.07865e+06	0	3.3365e+06	0	7.30062e+06	0	1.51005e+06	2.12921e+06	1.90936e+06	1.21551e+06	1.03018e+06	2.746e+06	2.84612e+06	-0.315305	0.157812	0.369495	4.15984e+06	7.13364e+06	5.792e+06	899318	3.57462e+06	1.40938e+06	-0.665163	-0.300081	-0.6138	7.45674e+06	2.49081e+06	3.25989e+06	27.2	46.2	26.1	72.4	60.7	1.26	0.693	-2.9	0.0816	3.25
F1RCP0	Phosphatidylinositol 4-kinase, catalytic, alpha a OS=Danio rerio OX=7955 GN=pi4kaa PE=1 SV=1	pi4kaa	44	6.76392e+06	2.1467e+07	8.27351e+07	9.46397e+06	3.5007e+08	6.36224e+07	2.87905e+08	5.67242e+08	5.60521e+08	1.01247e+08	3.5081e+08	5.27038e+07	1.72253e+08	1.283e+08	1.19678e+08	5.39265e+07	3.77147e+07	7.67223e+07	4.32085e+07	8.66417e+07	6.00496e+07	-0.0962328	0.361216	-0.106411	2.94405e+08	3.51341e+08	3.32805e+08	2.2665e+08	2.20576e+08	2.35207e+08	-0.11359	-0.202171	-0.150739	1.5555e+08	1.38955e+08	1.6514e+08	34.9	34.6	8.9	3.23	8.65	1.13	0.693	-1.43	0.0129	5.81
Q6NX89	Eukaryotic translation initiation factor 5A OS=Danio rerio OX=7955 GN=eif5a PE=1 SV=1	eif5a	2	5815239	3.85629e+06	0	3.03723e+06	8.08711e+06	6496461	5.44151e+06	1.37863e+07	5334140	3526247	1.16514e+07	0	5.53305e+06	0	0	7.0365e+06	4.92251e+06	5.68681e+06	4.74593e+06	4.24043e+06	7.51403e+06	-0.171035	-0.0647759	0.121004	5.4472e+06	4.36763e+06	3.85967e+06	5.23861e+06	8.55242e+06	7.39001e+06	-0.0169573	0.291843	0.282095	5.94178e+06	784454	520127	18.2	32	17.8	23.8	127	-1.07	0.692	1.55	0.0808	-1.29
P02538	Keratin, type II cytoskeletal 6A OS=Homo sapiens GN=KRT6A PE=1 SV=3	KRT6A	12	1.8414e+09	1.01e+09	4.74417e+09	7.46053e+08	4.86072e+08	4.59582e+09	1.43747e+09	1.56224e+09	7.84974e+08	1.53599e+09	2.01458e+09	1.64209e+09	2149019199	1.75936e+09	1.71502e+09	2.04616e+09	1.04251e+09	4.17247e+09	1.30155e+09	5.72756e+08	4.63492e+09	-0.19648	-0.260111	0.0456493	1.3465e+09	9.00688e+08	4.43436e+08	2.40625e+09	1.36838e+09	2.71916e+09	0.252134	0.181633	0.787604	1.91417e+09	1.77122e+09	1.90296e+09	66	99.8	50.3	32.7	4.27	-1.12	0.691	2.41	0.0833	-2.7
A2BHA3	Creatine kinase, muscle a OS=Danio rerio OX=7955 GN=ckma PE=1 SV=1	ckma	4	1.73014e+07	56623485	1.52844e+07	1.368e+07	7.85002e+06	107937849	1.39688e+07	1.07144e+07	1.25183e+07	10577974	8.6968e+06	16128003	26260735	2.07954e+07	18262832	1.96429e+07	5.91029e+07	1.8005e+07	2.41192e+07	1.91437e+07	1.07565e+08	0.0891561	-0.489583	0.776277	1.38219e+07	8.17872e+06	7.73325e+06	1.56339e+07	6.83892e+06	2.44931e+07	0.0535004	-0.077698	0.500682	2.46229e+07	2.71823e+07	2.01862e+07	72.2	98.8	34.2	56.4	14.8	1.56	0.688	1.58	0.446	-3.25
B3DKJ3	Snx1 protein OS=Danio rerio OX=7955 GN=snx1a PE=2 SV=1	snx1a	3	7.32645e+06	2.0814e+07	1.25606e+07	5.62616e+06	2.50284e+07	6.83269e+06	7036857	14148606	3.02159e+07	2697980	1.4705e+07	1.41051e+07	14999839	4.93082e+06	3.83842e+06	8.77489e+06	2.14203e+07	1.21713e+07	8.7401e+06	2.91473e+07	1.58267e+07	-0.00172505	0.133774	0.114053	6.94145e+06	9.1174e+06	1.76456e+07	3.90558e+06	1.08369e+07	2.12332e+07	-0.249765	0.0750358	0.080378	1.41736e+07	5.59181e+06	4.5811e+06	46.3	57.9	50.4	72.7	64.9	1.27	0.688	1.07	0.906	-1.26
E7FAK6	Protocadherin 2 gamma 5 OS=Danio rerio OX=7955 GN=pcdh2g5 PE=4 SV=1	pcdh2g5	12	3.25486e+06	4.61658e+06	682631	274519	1.56666e+08	505822	4.89574e+07	1.00968e+08	1.14586e+08	7.85737e+07	165075594	64462.9	2.61803e+07	3.15918e+07	3.66123e+07	7.36644e+06	8.98057e+06	6.73027e+06	8.38958e+06	2.8456e+07	4.12835e+06	0.0564824	0.500871	-0.212256	4.99951e+07	6.42022e+07	6.83093e+07	1.15086e+08	1.18787e+08	1.66564e+08	0.362096	0.267219	0.387101	3.17968e+07	3.55407e+07	3.5467e+07	15.1	95.1	15.8	21.5	6.25	1.78	0.686	2.19	0.00768	7.91
F1QQI6	Translocase of outer mitochondrial membrane 70 homolog A (S. cerevisiae) OS=Danio rerio OX=7955 GN=tomm70a PE=1 SV=1	tomm70a	1	0	0	0	0	524174	0	0	0	0	0	0	0	0	0	0	785276	445698	291082	544279	589640	162832	-0.159201	0.121547	-0.252275	451210	256831	96566.7	314502	349628	707228	-0.156756	0.133959	0.864732	315972	577738	693809	49.8	54.2	66.2	47.5	36.6	-1.17	0.685	1.7	0.296	-1.89
F1QYD7	Junctional adhesion molecule 3b (Fragment) OS=Danio rerio OX=7955 GN=jam3b PE=1 SV=1	jam3b	8	1.34319e+06	667319	0	0	2.42407e+08	0	2.68201e+08	3.83571e+08	3.54811e+08	9.70664e+07	3.28053e+08	0	1.44938e+08	1.37172e+08	1.32004e+08	4.4486e+06	4.01402e+06	4.96166e+06	4.00475e+06	1.29355e+07	3.1772e+06	-0.0456489	0.508204	-0.193582	2.54323e+08	2.24938e+08	1.93587e+08	1.4703e+08	2.27216e+08	8.4989e+07	-0.237978	0.00437633	-0.357514	1.30946e+08	1.38804e+08	1.45885e+08	10.6	80.7	13.5	46.6	5.39	1.5	0.683	-1.47	0.248	50.1
Q4V950	Major histocompatibility complex class I UEA protein OS=Danio rerio OX=7955 GN=mhc1uea PE=2 SV=1	mhc1uea	2	1.31734e+11	1.31387e+11	1.98202e+11	4.27001e+11	4.99072e+10	1.75474e+11	2.05597e+11	1.42218e+11	2.30916e+11	6.39154e+10	2.75253e+11	2.36946e+11	3.12098e+11	2.14171e+11	1.12868e+11	1.51233e+11	1.35164e+11	1.6909e+11	9.22586e+11	6.21967e+10	1.8494e+11	0.785359	-0.337093	0.0389143	1.87204e+11	6.83913e+10	9.90449e+10	1.13914e+11	1.63416e+11	4.62498e+11	-0.215739	0.378293	0.669277	2.66994e+11	2.15959e+11	1.29284e+11	11.2	119	52.2	76.5	34.1	2.57	0.681	2.09	0.288	-1.28
A0A0R4INE1	Inactive rhomboid protein OS=Danio rerio OX=7955 GN=rhbdf1a PE=3 SV=1	rhbdf1a	2	0	0	0	0	7.93888e+06	0	6.16413e+06	13462180	9.68981e+06	0	9.16531e+06	0	2.62263e+06	3.35366e+06	4.02917e+06	871082	851462	491397	241333	2.02898e+06	273663	-0.557442	0.377112	-0.254217	5.84147e+06	8.57016e+06	5.86666e+06	733934	6.7631e+06	1.41003e+06	-0.900865	-0.102843	-0.619164	5.89229e+06	3.90363e+06	4.62084e+06	29	121	23.2	111	21	1.15	0.681	-2.28	0.196	9.16
A0A0R4ISC3	Microtubule-associated protein 1Sa OS=Danio rerio OX=7955 GN=map1sa PE=1 SV=1	map1sa	1	0	0	0	0	0	1.54649e+06	0	0	0	0	0	0	0	0	0	459439	252229	296031	191195	290586	1.59187e+06	-0.380752	0.0614792	0.730572	172898	755206	529015	227543	102467	1.0503e+06	0.119272	-0.867482	0.297844	433947	409319	834255	32.5	113	60.4	112	42.7	2.06	0.679	-1.06	0.696	1.45
Q8UVJ6	Vang-like protein 2 OS=Danio rerio OX=7955 GN=vangl2 PE=1 SV=1	vangl2	2	0	0	0	0	2522950	0	8.58016e+06	5.51557e+06	1.02873e+07	0	7.02767e+06	0	5.03531e+06	2.14199e+06	1208457	981021	1.15821e+06	1.57607e+06	1.35017e+06	4.06138e+06	694227	0.13871	0.544886	-0.356073	8.12031e+06	3.61297e+06	6.23558e+06	516078	5.21455e+06	339673	-1.19686	0.159352	-1.26382	6.20433e+06	3.17111e+06	1.58413e+06	24.7	87.7	37.8	137	64.3	1.64	0.679	-2.96	0.166	4.84
Q6TNT9	Rab GDP dissociation inhibitor OS=Danio rerio OX=7955 GN=gdi2 PE=1 SV=1	gdi2	2	0	0	5594862	0	0	2.46606e+06	0	3.02316e+06	976654	0	7.36121e+06	0	2309376	0	0	828485	1.152e+06	5.1093e+06	1.03907e+06	621665	2.87992e+06	0.0983606	-0.267895	-0.248981	639347	2.01081e+06	797300	936819	5.45326e+06	229849	0.165919	0.433285	-0.540179	3.13869e+06	1.21229e+06	1.2344e+06	101	79.4	65.3	128	59.4	-1.56	0.679	1.92	0.967	-2.06
Q9I8K8	Sphingosine 1-phosphate receptor 2 OS=Danio rerio OX=7955 GN=s1pr2 PE=1 SV=1	s1pr2	2	0	0	0	0	0	0	1.32192e+06	8.89828e+06	2.04769e+06	1.39945e+06	2.00504e+06	0	694496	0	583085	473128	1.04336e+06	1.12155e+06	1.50235e+06	308641	573654	0.501792	-0.52898	-0.291168	1.82423e+06	5.73423e+06	2.15296e+06	2.09902e+06	1.77114e+06	2.68232e+06	0.060936	-0.510223	0.0954748	846871	610237	961192	40.3	78.9	67	21.1	22.2	-1.11	0.678	-1.48	0.534	3.68
A0A0R4IDE1	Myotilin OS=Danio rerio OX=7955 GN=myot PE=4 SV=1	myot	2	12957441	1.82641e+07	1.80924e+07	1.23528e+07	5.50985e+06	19479025	2.18766e+06	11846404	9.36996e+06	935901	6.81512e+06	1.36082e+07	1.20739e+07	1.10216e+07	5.50781e+06	1.41008e+07	1.85911e+07	1.64064e+07	1.93694e+07	6.2909e+06	2.01256e+07	0.137872	-0.470593	0.0887368	3.95464e+06	7.54858e+06	5.69894e+06	5.65989e+06	5.0555e+06	2.03371e+07	0.155702	-0.174101	0.552495	1.10104e+07	1.10764e+07	1.40338e+07	13.7	51	31.3	83.6	14.3	-1.07	0.675	1.81	0.466	-2.85
E7F2Q6	Uncharacterized protein OS=Danio rerio OX=7955 PE=4 SV=2	E7F2Q6	1	0	0	0	0	0	2.30916e+06	0	0	0	0	0	0	0	0	2.88444e+06	193615	431946	165637	109525	217584	2.37886e+06	-0.247428	-0.297803	1.15721	439257	1.109e+06	125278	267446	430144	243977	-0.215483	-0.411318	0.289472	249440	849501	3.12269e+06	55.5	142	90.1	32.3	108	3.42	0.672	-1.78	0.727	2.12
A0A0R4IQA4	NADH dehydrogenase [ubiquinone] 1 alpha subcomplex subunit 10, mitochondrial OS=Danio rerio OX=7955 GN=ndufa10 PE=1 SV=1	ndufa10	6	7.79278e+06	1.01296e+07	1.12978e+07	1.03348e+07	1.86162e+07	1.85641e+06	1.43307e+07	35244241	30926208	1.35412e+07	1.02471e+07	3.13103e+06	1.11686e+07	5.26264e+06	1.04226e+07	1.01723e+07	1.23505e+07	1.61297e+07	9.86642e+06	2.19299e+07	4.86412e+06	-0.0132585	0.249352	-0.520622	1.81826e+07	2.28492e+07	1.96466e+07	1.99631e+07	9.87916e+06	6.29898e+06	0.0405705	-0.364151	-0.494016	1.16463e+07	1.35698e+07	1.24086e+07	23.4	71.8	11.8	58.8	7.72	-1.05	0.672	-1.68	0.199	1.57
Q642H9	40S ribosomal protein S4, X isoform OS=Danio rerio OX=7955 GN=rps4x PE=2 SV=3	rps4x	11	1.81121e+07	2.11094e+07	2.40498e+07	1.151e+07	2.59364e+08	16692589	125382870	235313021	3.1728e+08	75252061	2.0904e+08	9.11881e+06	104882942	92927472	7.04883e+07	2.73238e+07	2.11705e+07	3.14643e+07	1.96909e+07	1.02858e+08	2.03141e+07	-0.142277	0.686507	-0.190019	1.39161e+08	1.44591e+08	1.80474e+08	1.12205e+08	1.50111e+08	1.15486e+08	-0.0935035	0.0162738	-0.193886	9.81215e+07	9.41596e+07	7.75686e+07	19.4	100	14.5	16.7	12.1	1.79	0.671	-1.23	0.167	5.81
A0A0R4II62	Serine/threonine kinase 11 OS=Danio rerio OX=7955 GN=stk11 PE=1 SV=1	stk11	3	3.24872e+06	2255794	4.49968e+06	0	3.12899e+06	570249	8.075e+06	9.5082e+06	1.10102e+07	6.04728e+06	2.92531e+06	0	5.43525e+06	5.45241e+06	1.8412e+06	3.92434e+06	3.68106e+06	4.11695e+06	4.36071e+06	5.23912e+06	1.41952e+06	0.0457898	0.153285	-0.462433	7.65228e+06	6.83199e+06	6.73343e+06	2.23414e+06	2.37237e+06	3.01251e+06	-0.534681	-0.459364	-0.349307	4.98821e+06	5.47795e+06	4.25357e+06	5.59	54.5	7.13	16.4	12.6	-1.06	0.67	-2.78	0.00278	1.81
A0A140LFM7	Zgc:172302 (Fragment) OS=Danio rerio OX=7955 GN=zgc:172302 PE=4 SV=1	zgc:172302	3	0	0	757908	0	5.26706e+06	0	6205415	1.2933e+07	1.24412e+07	1.24501e+06	1.54476e+07	0	5.44612e+06	1.97941e+06	5.46748e+06	891307	1.15309e+06	1.92982e+06	1.42875e+06	6.3464e+06	620594	0.20493	0.740665	-0.492709	6.61986e+06	8.29717e+06	7.56412e+06	2.60547e+06	4.49043e+06	3.18025e+06	-0.404963	-0.266642	-0.376297	4.99656e+06	4.99989e+06	6.42439e+06	40.8	111	11.2	28.2	15	2.11	0.668	-2.19	0.024	5.66
E7FG26	Ephrin-B3a OS=Danio rerio OX=7955 GN=efnb3a PE=3 SV=1	efnb3a	2	0	0	0	0	1.17265e+07	0	0	11127399	0	6.9796e+06	3750403	0	0	0	0	820571	651547	1.77604e+06	747616	3.72525e+06	801340	-0.0404375	0.75721	-0.345637	633785	550330	238747	9.90455e+06	3.04075e+06	4.42218e+06	1.19389	0.742358	1.2677	946729	864928	674240	56	96.9	43.9	62.7	16.9	1.62	0.668	12.2	0.00634	-2.28
E7F4R0	Myeloid/lymphoid or mixed-lineage leukemia; translocated to, 4a OS=Danio rerio OX=7955 GN=afdna PE=1 SV=2	afdna	43	3.82417e+08	4.14047e+08	4.18231e+08	2.68368e+08	7.04955e+08	2.50488e+08	6.10496e+08	9.05454e+08	8.01425e+08	431517063	9.75626e+08	2.8708e+08	5.90511e+08	5.27583e+08	5.25906e+08	4.36597e+08	4.42885e+08	4.2982e+08	5.25669e+08	6.79263e+08	3.22547e+08	0.0806317	0.185747	-0.124694	6.08962e+08	5.66938e+08	4.82332e+08	6.39657e+08	6.8448e+08	6.38277e+08	0.0213571	0.0818252	0.121663	5.3052e+08	5.39384e+08	5.88497e+08	1.5	35.1	11.7	4.02	5.65	1.17	0.668	1.18	0.118	1.27
Q568M0	RAS-related 2 OS=Danio rerio OX=7955 GN=rras2 PE=1 SV=1	rras2	18	3.09289e+08	122910820	1.30413e+08	49600830	1.14921e+09	7.09079e+07	1.87007e+09	3029164906	2.50533e+09	9.11912e+08	2.30518e+09	6.26085e+07	1.09967e+09	1.04611e+09	1.01194e+09	1.3946e+08	1.30773e+08	1.16277e+08	9.10142e+07	1.08749e+09	7.79016e+07	-0.185341	0.919904	-0.173949	1.74554e+09	1.72888e+09	1.32851e+09	1.40257e+09	1.56608e+09	4.30812e+08	-0.0950059	-0.0429505	-0.489078	1.00885e+09	1.05374e+09	1.12138e+09	9.09	138	14.7	54.2	5.34	3.25	0.665	-1.41	0.364	12.4
A8E526	Ribosomal protein L14 OS=Danio rerio OX=7955 GN=rpl14 PE=1 SV=1	rpl14	2	0	0	3.31376e+06	0	1.01201e+07	0	0	20977111	19765859	2.82867e+06	11747608	0	0	3.1602e+06	5.86521e+06	1.03056e+06	1.24823e+06	3.77467e+06	890662	4.9339e+06	290998	-0.0633615	0.596894	-1.11299	1.30962e+07	1.32295e+07	1.17384e+07	3.93463e+06	9.45393e+06	8.72445e+06	-0.52224	-0.14593	-0.128871	3.21674e+06	3.52831e+06	6.35147e+06	75.6	124	6.5	40.7	39.6	1.01	0.662	-1.72	0.158	6.29
D0EWS1	Low density lipoprotein-related protein 6 OS=Danio rerio OX=7955 GN=lrp5 PE=2 SV=1	lrp5	1	0	0	0	0	2.119e+06	0	0	0	0	841115	0	0	0	0	0	187525	294278	922997	739859	2.41359e+06	120212	0.596089	0.913905	-0.885253	108390	228988	224561	1.15469e+06	216328	198982	1.02748	-0.0246988	-0.0525208	773633	812108	592363	84.9	109	36.5	104	16.2	2.33	0.661	2.79	0.334	-2.5
P04264	Keratin, type II cytoskeletal 1 OS=Homo sapiens GN=KRT1 PE=1 SV=6	KRT1	130	9.35938e+10	8.01461e+10	1.86134e+11	5.14715e+10	2.61686e+10	1.90624e+11	1.16658e+11	1.2177e+11	7.56256e+10	1.0763e+11	1.00711e+11	1.07296e+11	1.11803e+11	1.02191e+11	9.70752e+10	1.05384e+11	8.20969e+10	1.62202e+11	9.50552e+10	3.17431e+10	1.99371e+11	-0.0447986	-0.412678	0.0896068	1.07768e+11	6.49764e+10	3.77149e+10	1.79128e+11	6.53732e+10	1.88237e+11	0.220674	0.00264425	0.698191	9.82661e+10	1.02929e+11	1.0904e+11	35.4	77.9	50.3	47.5	5.23	-1.07	0.66	2.06	0.199	-1.66
Q7ZVF9	Actin, cytoplasmic 2 OS=Danio rerio OX=7955 GN=actbb PE=2 SV=2; Duplicate proteins: A8WG05|A8WG05_DANRE	actbb	8	1.6557e+08	162295522	6.48288e+08	1.4682e+08	3.31764e+08	319768935	256888100	4.80573e+08	5.34356e+08	2.27068e+08	9.70919e+08	209107069	364288113	3.57136e+08	3.29324e+08	1.82271e+08	1.74465e+08	5.78547e+08	2.76307e+08	3.70431e+08	3.31837e+08	0.180674	0.326999	-0.241413	2.41411e+08	2.84723e+08	2.94822e+08	3.42879e+08	6.43448e+08	3.74004e+08	0.152385	0.354091	0.103317	3.27989e+08	3.59693e+08	3.62913e+08	74.1	14.5	10.4	36.5	5.51	1.05	0.658	1.66	0.131	-1.14
F1RD76	Mitochondrial pyruvate carrier OS=Danio rerio OX=7955 GN=zgc:103678 PE=1 SV=1	zgc:103678	2	3122342	0	0	0	2.68641e+06	0	2.99624e+06	9.62993e+06	1.12239e+07	1.98401e+06	2.6371e+06	3550405	4.75108e+06	3.83979e+06	2.70406e+06	3.56208e+06	696135	1.93216e+06	727660	3.04845e+06	837344	-0.689775	0.641386	-0.363138	6.29835e+06	6.20925e+06	6.78556e+06	2.73762e+06	4.8693e+06	6.01472e+06	-0.361853	-0.105573	-0.0523703	4.35412e+06	3.85761e+06	2.91561e+06	69.7	85.1	4.82	36.6	19.7	-1.34	0.657	-1.42	0.231	3.12
B3DKL2	Delta-like protein OS=Danio rerio OX=7955 GN=jag2b PE=2 SV=1	jag2b	1	0	0	0	0	2.6517e+06	0	2.71322e+06	9013332	8779626	1262164	9.84171e+06	0	2.27134e+06	2.93746e+06	2.52637e+06	655673	505851	365773	485471	3.02641e+06	264794	-0.130524	0.776906	-0.140303	2.5724e+06	5.70933e+06	5.23411e+06	1.74912e+06	7.15566e+06	4.13277e+06	-0.167518	0.0980643	-0.102601	2.0835e+06	2.95144e+06	2.73312e+06	28.5	122	37.5	62.3	17.4	2.47	0.652	-1.04	0.8	8.85
Q6IQE6	Zgc:86798 OS=Danio rerio OX=7955 GN=ralbb PE=2 SV=1	ralbb	1	0	0	0	0	8915043	0	17500414	26776704	23078670	10979099	29854240	0	10870127	8748447	9130423	343876	609282	842745	802120	85479.4	772915	0.367837	-0.852957	-0.0375643	1.64812e+07	1.64427e+07	1.33352e+07	1.59989e+07	2.12347e+07	3.27338e+07	-0.0128983	0.111071	0.389997	9.87953e+06	8.79312e+06	9.94557e+06	41.7	73.3	11.7	36.7	6.78	-1.08	0.651	1.51	0.207	25.8
B0R0D7	Coronin OS=Danio rerio OX=7955 GN=coro1ca PE=1 SV=1	coro1ca	1	842182	1.27194e+06	1.53666e+06	712244	0	916527	742406	1212721	766425	0	2154191	524968	1.13039e+06	0	957096	906469	1.29188e+06	1.40863e+06	1.04953e+06	3.13197e+06	942420	0.0636407	0.384596	-0.174552	707164	813390	494421	1.35748e+06	1.61407e+06	734854	0.283214	0.297624	0.172104	1.04119e+06	1.27324e+06	1.03007e+06	21.9	72.3	24.2	36.6	12.3	1.42	0.648	1.84	0.123	-1.79
A4JYP3	cDNA, clone cssl:d0217 OS=Danio rerio OX=7955 GN=sc:d217 PE=2 SV=1	sc:d217	2	0	0	0	0	8928760	0	32469212	5.06034e+07	4.1034e+07	8069003	26669612	0	16142902	11478837	11311104	676416	955457	1.18342e+06	2.22651e+06	567149	1.16713e+06	0.517411	-0.226514	-0.00601848	3.11438e+07	3.11645e+07	2.35783e+07	1.19257e+07	1.99318e+07	2.46086e+07	-0.416887	-0.194112	0.0185741	1.49975e+07	1.23538e+07	1.27416e+07	27.1	63.6	15.3	34.1	10.7	1.41	0.648	-1.52	0.157	30.5
Q6DH13	RNA-binding protein, mRNA-processing factor 2a OS=Danio rerio OX=7955 GN=rbpms2a PE=2 SV=1	rbpms2a	1	2448288	3.69887e+06	5504644	3.37258e+06	2.46697e+06	4.95492e+06	14506412	33240661	5.57508e+06	4.33038e+06	6.57802e+06	1.85242e+06	6.20643e+06	0	7.80337e+06	2.65038e+06	3.76131e+06	5.00683e+06	5.19703e+06	2.81376e+06	5.11238e+06	0.292447	-0.126053	0.00906071	1.36708e+07	2.02866e+07	3.37286e+06	6.17542e+06	4.82101e+06	2.67788e+06	-0.345128	-0.624071	-0.100208	5.65951e+06	6.13239e+06	8.49292e+06	31	30.9	68.5	38.7	22.4	1.15	0.648	-2.73	0.27	3.27
E9QF35	Calpastatin (Fragment) OS=Danio rerio OX=7955 GN=cast PE=1 SV=1	cast	1	75886434	7.89512e+07	80989548	56025138	51505778	67440547	8.05133e+07	118373222	113388215	3.00119e+07	98129885	5.84711e+07	81350192	7.98693e+07	6.64953e+07	8.36856e+07	8.05564e+07	7.24655e+07	9.36017e+07	6.03632e+07	6.99534e+07	0.0486334	-0.125328	-0.0153221	7.54091e+07	6.96732e+07	6.22285e+07	4.47673e+07	6.81728e+07	9.23159e+07	-0.226463	-0.00945477	0.171287	7.30642e+07	8.03338e+07	7.32033e+07	7.34	22.9	9.56	34.7	5.5	-1.06	0.647	-1.01	0.838	-1.14
Q1L9A3	Protein phosphatase 1, regulatory subunit 13-like OS=Danio rerio OX=7955 GN=ppp1r13l PE=4 SV=1	ppp1r13l	8	1.9178e+07	2.16718e+07	9.09435e+07	2.09737e+07	37071700	7.53197e+07	36671209	3.67481e+07	2.64148e+07	1.72502e+07	4.51024e+07	30501995	5.08852e+07	3.73204e+07	3.58727e+07	2.2174e+07	2.38041e+07	7.169e+07	3.5597e+07	2.79253e+07	7.9508e+07	0.205569	0.069345	0.0449522	3.59391e+07	2.41165e+07	1.6978e+07	2.891e+07	3.43048e+07	4.7785e+07	-0.094519	0.15304	0.449404	5.00089e+07	3.87685e+07	3.45374e+07	71.7	58.4	37.3	26.3	19.5	1.22	0.646	1.44	0.22	-1.53
E7F7U1	Paxillin b OS=Danio rerio OX=7955 GN=pxnb PE=1 SV=2	pxnb	2	13474300	1.77295e+07	25654549	16868533	1.6843e+07	1.54393e+07	14193794	34091489	40600291	8.51593e+06	2.89556e+07	7.5443e+06	31077571	1.942e+07	2.1427e+07	1.46719e+07	1.80472e+07	2.3206e+07	2.67142e+07	1.94577e+07	1.59482e+07	0.260258	0.0326835	-0.162889	1.3409e+07	2.1154e+07	2.34608e+07	1.21658e+07	2.08492e+07	2.15939e+07	-0.0422552	-0.00630392	-0.0360114	2.81663e+07	1.95203e+07	2.33699e+07	23.1	26.5	27.2	28.8	18.3	1.11	0.645	-1.06	0.81	1.04
B0R0F7	Cardiac myosin light chain-1 OS=Danio rerio OX=7955 GN=cmlc1 PE=1 SV=1	cmlc1	13	5.01931e+08	614204148	526653904	3.09452e+08	208392647	7.13063e+08	9.66047e+07	5.05268e+08	5.44256e+08	6.55583e+07	5.89595e+08	3.74989e+08	5.07991e+08	438960881	4.22162e+08	5.5391e+08	6.27175e+08	4.71697e+08	5.17043e+08	2.56366e+08	7.40046e+08	-0.0299122	-0.388528	0.195595	9.63881e+07	3.03092e+08	3.03261e+08	1.82801e+08	4.11965e+08	5.78018e+08	0.277956	0.133285	0.280125	4.60774e+08	4.44863e+08	4.64866e+08	14.1	48	51	50.8	2.31	-1.09	0.643	1.67	0.36	-2.35
A0A0R4IW85	Sorbin and SH3 domain-containing 2b OS=Danio rerio OX=7955 GN=sorbs2b PE=4 SV=1	sorbs2b	20	7.10234e+08	8.11868e+08	7.48272e+08	5.32493e+08	8.31862e+08	6.09504e+08	4.40133e+08	6.42864e+08	7.38516e+08	5.64601e+08	5.308e+08	5.05893e+08	6.46935e+08	6.37966e+08	5.98976e+08	7.85196e+08	8.28764e+08	6.68817e+08	9.7319e+08	1.01384e+09	5.90742e+08	0.0932197	0.0875396	-0.0539094	4.37364e+08	3.68068e+08	4.06454e+08	1.00582e+09	3.53649e+08	8.25766e+08	0.361676	-0.0173561	0.307846	5.90429e+08	6.43037e+08	6.65257e+08	10.9	27.2	8.59	46.2	6.07	1.13	0.641	1.8	0.257	-1.88
Q5TZG5	Ezrin OS=Danio rerio OX=7955 GN=ezrb PE=1 SV=1	ezrb	2	2.14973e+06	0	9.82214e+06	0	4.18889e+06	1.18313e+06	1.16725e+06	0	4.03564e+06	0	24368704	0	5.68427e+06	3101473	0	2.82364e+06	3.15623e+06	8.93789e+06	5.19098e+06	4.77589e+06	1.34036e+06	0.26444	0.179885	-0.824014	1.38255e+06	1.89504e+06	2.58229e+06	387174	252065	349011	-0.552776	-0.876106	-0.869165	5.20606e+06	3.39093e+06	4.02522e+06	69.1	56.1	30.8	21.1	21.9	-1.32	0.638	-5.93	0.00202	-2.55
Q6DHP7	Guanylate-binding protein 1 OS=Danio rerio OX=7955 GN=gbp1 PE=1 SV=1	gbp1	1	0	0	0	0	2.59932e+06	0	0	0	0	0	0	0	0	0	0	1.05724e+06	357149	1.08464e+06	126773	2.9661e+06	203205	-0.921147	0.919337	-0.727349	350333	474729	628894	157748	305833	624535	-0.346517	-0.190962	-0.00302085	242744	234282	291196	49.5	147	28.8	65.8	12	1.32	0.636	-1.34	0.415	-1.72
Q6PBY3	Endothelial differentiation-related factor 1 homolog OS=Danio rerio OX=7955 GN=edf1 PE=2 SV=1; Duplicate proteins: A5PN46|A5PN46_DANRE	edf1	1	3.56435e+06	4.67113e+06	3.96951e+06	7.31844e+06	2658526	3.70069e+06	6.12141e+06	6981395	8.30156e+06	3.48653e+06	11412952	3859625	5706004	4.94294e+06	4.01353e+06	3.8664e+06	4.75121e+06	3.61774e+06	1.15316e+07	3.03427e+06	3.81603e+06	0.474584	-0.19475	0.0231751	5.78674e+06	4.45457e+06	4.95808e+06	4.94705e+06	8.27377e+06	5.68509e+06	-0.0680872	0.268898	0.0594243	5.20576e+06	4.96728e+06	4.35272e+06	14.6	76.6	13.3	27.7	9.09	1.5	0.632	1.24	0.33	1.24
A0A1D5NSN9	Tight junction protein 1a (Fragment) OS=Danio rerio OX=7955 GN=tjp1a PE=1 SV=1	tjp1a	1	9.42113e+06	1.36679e+07	4.5879e+06	9.03655e+06	8.21776e+06	8.0661e+06	11189373	14909066	17935372	3.33047e+06	13893545	1419371	10187426	1.1275e+07	7.20771e+06	1.02732e+07	1.39187e+07	4.17764e+06	1.43255e+07	9.47429e+06	8.33067e+06	0.144404	-0.167053	0.299749	1.05547e+07	9.30933e+06	1.04482e+07	4.72061e+06	1.00329e+07	2.03795e+06	-0.349448	0.0325094	-0.709846	9.26259e+06	1.13335e+07	7.8413e+06	52	29.7	6.83	72.7	18.5	1.13	0.632	-1.81	0.228	1.07
X1WFZ0	Kinesin family member 13Ba OS=Danio rerio OX=7955 GN=kif13ba PE=1 SV=1	kif13ba	2	0	0	0	0	1.96615e+06	0	676876	970606	0	0	1.04264e+06	714071	2.15306e+06	486664	728013	791845	748152	2.03975e+06	789499	2.22441e+06	1.37205e+06	-0.00128886	0.473224	-0.172207	788770	1.00378e+06	747031	2.07666e+06	931557	1.11578e+06	0.420414	-0.0324276	0.174241	1.98256e+06	686094	1.04418e+06	61.5	49.4	16.3	44.7	54.1	1.23	0.63	1.62	0.21	-1.41
O93409	Mylz2 protein OS=Danio rerio OX=7955 GN=mylpfa PE=1 SV=1	mylpfa	4	1.43335e+06	7.87379e+07	3.04224e+06	0	1.94176e+07	1.22338e+08	0	0	734969	0	4217104	0	27002924	1.14511e+07	1.11861e+07	2.5653e+07	8.09731e+07	6.85108e+06	2.32231e+07	2.42248e+07	1.01096e+08	-0.0432175	-0.52408	1.16897	2.44101e+06	765722	1.35947e+06	1.63216e+06	4.37841e+06	2.11665e+06	-0.174805	0.757246	0.192279	2.55714e+07	1.1823e+07	1.30805e+07	102	90.2	55.8	54.1	45.2	1.31	0.624	1.78	0.255	-24.9
Q5XJC3	Cardiac myosin light chain-1 OS=Danio rerio OX=7955 GN=cmlc1 PE=2 SV=1	cmlc1	2	1.82494e+07	7.64896e+06	1.91378e+07	12690124	5502318	22251537	495537	2.05753e+07	2.18275e+07	0	1.34131e+07	1.08025e+07	1.22725e+07	8.33409e+06	1.14868e+07	1.99187e+07	2.28325e+07	1.73459e+07	1.99723e+07	1.21328e+07	2.30012e+07	0.00116674	-0.274593	0.122554	7.33466e+06	1.2944e+07	1.28829e+07	1.00807e+07	9.78295e+06	1.61231e+07	0.138112	-0.121597	0.097433	1.11813e+07	8.3747e+06	1.24847e+07	13.7	30.5	29.1	29.8	19.7	-1.09	0.624	1.09	0.743	-1.81
Q7ZW18	Calcium-transporting ATPase OS=Danio rerio OX=7955 GN=atp2a2a PE=2 SV=1	atp2a2a	23	2.23035e+08	3.26897e+08	2.95137e+08	1.32811e+08	5.85385e+08	2.03677e+08	2.6579e+08	7.07224e+08	7.58516e+08	2.10158e+08	5.60281e+08	1.28468e+08	3.73065e+08	3.42415e+08	315085625	2.52968e+08	3.34671e+08	2.42843e+08	2.67938e+08	5.28238e+08	2.29763e+08	0.0249688	0.198211	-0.0240451	2.67071e+08	4.295e+08	4.29827e+08	3.12088e+08	3.58984e+08	2.79375e+08	0.0676495	-0.0778874	-0.187105	3.4409e+08	3.35233e+08	3.51406e+08	18.2	47.5	25	12.6	2.36	1.24	0.622	-1.19	0.453	1.36
F1QM97	Dishevelled segment polarity protein 2 OS=Danio rerio OX=7955 GN=dvl2 PE=1 SV=1	dvl2	15	2.20122e+08	2.35861e+08	1.86851e+08	1.01657e+08	1.86602e+08	1.80879e+08	1.69744e+08	2.43892e+08	2.7123e+08	1.25061e+08	2.83901e+08	8.43693e+07	2.51128e+08	1.98376e+08	1.74598e+08	2.41366e+08	2.41374e+08	1.70407e+08	1.89642e+08	2.23142e+08	1.89849e+08	-0.104742	-0.0341081	0.0469205	1.68455e+08	1.51843e+08	1.57887e+08	1.85492e+08	2.02198e+08	2.09183e+08	0.0418409	0.124383	0.122179	2.27877e+08	2.01114e+08	2.37228e+08	18.8	9.6	5.28	6.12	8.44	-1.08	0.622	1.25	0.00977	-1.37
A0A140LGL3	Utrophin OS=Danio rerio OX=7955 GN=utrn PE=1 SV=1	utrn	3	2.98388e+06	5969589	3907192	1.72607e+06	2.8335e+07	3.49072e+06	23606393	3.01909e+07	3.52033e+07	1.44221e+07	2.41041e+07	3.27114e+06	1.96285e+07	1.21411e+07	15097485	3.87726e+06	7.49871e+06	4.60161e+06	3.68833e+06	2.68995e+07	4.20043e+06	-0.0216951	0.554758	-0.0396167	2.22693e+07	1.88721e+07	2.05737e+07	2.06852e+07	1.75104e+07	7.58205e+06	-0.032047	-0.0325256	-0.433526	1.78639e+07	1.79724e+07	1.95784e+07	36	114	8.26	44.8	5.2	2.18	0.621	-1.35	0.343	3.86
F1QAV3	YEATS domain-containing 2 OS=Danio rerio OX=7955 GN=yeats2 PE=1 SV=2	yeats2	3	4318173	6806449	6077276	3.48059e+06	5955402	7.58942e+06	11973311	2.9235e+07	1.99069e+07	2.94141e+06	0	6046184	1.12283e+07	1.19535e+07	9.6499e+06	5.35575e+06	7.9638e+06	8.55299e+06	5.67597e+06	1.30426e+07	7.82019e+06	0.0252197	0.214244	-0.0389004	1.27413e+07	1.81131e+07	1.19176e+07	4.20121e+06	4.83229e+06	8.76347e+06	-0.481839	-0.573839	-0.133512	1.02411e+07	1.20137e+07	1.17221e+07	23.3	42.8	23.6	41.7	8.39	1.21	0.621	-2.4	0.0355	1.96
Q7ZUS9	Electron-transfer-flavoprotein, alpha polypeptide OS=Danio rerio OX=7955 GN=etfa PE=2 SV=1	etfa	11	2.95241e+07	36429580	2.22693e+07	5.10234e+06	76646978	1.59476e+07	6.02731e+07	108902016	1.44868e+08	2.09343e+07	7.94291e+07	7.57103e+06	52082691	5.14038e+07	4.35019e+07	3.55519e+07	3.87458e+07	3.38994e+07	2.53821e+07	5.51428e+07	1.93041e+07	-0.146335	0.153264	-0.244542	7.19109e+07	7.06501e+07	7.72194e+07	3.18731e+07	5.90726e+07	4.69801e+07	-0.353371	-0.0777271	-0.215812	4.36305e+07	5.32759e+07	4.91757e+07	6.83	57.6	4.76	29.6	9.94	-1.08	0.621	-1.59	0.107	2.03
F1QC03	Zyxin OS=Danio rerio OX=7955 GN=zyx PE=1 SV=1	zyx	7	1.38068e+08	1.58671e+08	1.3409e+08	1.41624e+08	10769990	1.89249e+08	1.32393e+07	12311992	1.56612e+07	4.57885e+06	3.41416e+07	125110996	7.39277e+07	7.67594e+07	6.19818e+07	1.51187e+08	1.61689e+08	1.20977e+08	2.30106e+08	1.02261e+08	1.95967e+08	0.182412	-0.198974	0.209478	1.54538e+07	1.75477e+07	1.12887e+07	5.36402e+07	6.00275e+07	1.59954e+08	0.540457	0.53413	1.15135	7.60912e+07	7.71575e+07	6.75609e+07	14.6	37.6	21.6	65.4	7.15	1.22	0.62	6.18	0.027	-9.8
E7F354	3-monooxygenase/tryptophan 5-monooxygenase activation protein, gamma polypeptide 2 OS=Danio rerio OX=7955 GN=ywhag2 PE=1 SV=1	ywhag2	1	0	0	1.09472e+06	0	0	0	0	0	0	0	491393	0	0	0	0	369223	779856	1.00559e+06	293263	1.14288e+06	373501	-0.100032	0.165985	-0.430127	309341	160588	522795	152077	379116	105921	-0.308374	0.37306	-0.69335	694759	295623	864843	44.9	77.8	55	68.9	47.2	-1.19	0.619	-1.56	0.399	-2.17
B3DJL5	Ptpra protein OS=Danio rerio OX=7955 GN=ptpra PE=2 SV=1	ptpra	1	0	0	0	0	0	0	0	0	2.61013e+06	0	4528712	0	0	0	0	715589	260804	169325	97233.4	94839.4	848856	-0.866848	-0.439326	0.700113	113242	1.00632e+06	1.61835e+06	295108	3.34369e+06	116296	0.415972	0.521491	-1.14351	831972	261642	279383	76.6	125	82.9	145	70.9	-1.1	0.617	1.37	0.909	2.39
E7F8G5	Rho GTPase-activating protein 35a OS=Danio rerio OX=7955 GN=arhgap35a PE=1 SV=1	arhgap35a	1	0	1.12554e+06	1.978e+06	1.5832e+06	1760064	749345	1.49793e+06	1429286	2.46248e+06	643796	0	1.87339e+06	1.29075e+06	1.64561e+06	1.1011e+06	906105	1.14303e+06	1.8104e+06	2.38716e+06	2.00143e+06	770200	0.420703	0.243284	-0.371171	1.42323e+06	954162	1.52968e+06	878340	763765	2.70897e+06	-0.209611	-0.0966622	0.248204	1.18796e+06	1.65314e+06	1.18594e+06	36.4	49.1	23.5	75.3	20.1	1.34	0.616	1.11	0.925	1.01
A0A0R4IUH6	NADH dehydrogenase (ubiquinone) 1 alpha subcomplex 4,-like OS=Danio rerio OX=7955 GN=ndufa4l PE=1 SV=1	ndufa4l	2	8.22293e+07	26139474	3.08091e+07	9.14061e+06	52513817	2.05175e+07	8.61929e+07	2.11766e+08	187152904	1.24716e+07	116258572	9.38753e+06	75704168	67386332	6.69501e+07	9.03962e+07	3.40376e+07	2.78097e+07	3.00142e+07	6.11806e+07	2.12018e+07	-0.478823	0.254655	-0.117823	8.09103e+07	1.25032e+08	1.03349e+08	1.85773e+07	3.45808e+07	1.44047e+07	-0.63902	-0.558184	-0.855801	6.82947e+07	6.77596e+07	7.34355e+07	67.9	56.1	21.4	47.3	4.49	-1.35	0.614	-4.58	0.0134	2.03
Q58ES2	Jph2 protein (Fragment) OS=Danio rerio OX=7955 GN=jph2 PE=2 SV=1	jph2	1	0	0	0	1855649	0	0	0	13946909	0	0	0	0	0	0	7.0289e+06	365524	279523	240433	2.81076e+06	197439	211336	0.885908	-0.150984	-0.0560209	936336	446822	117110	232650	762185	518560	-0.604728	0.231926	0.646205	417585	1.01733e+06	943978	21.7	140	82.4	52.5	41.3	3.64	0.613	1.01	0.783	1.69
Q803J6	Sdcbp protein OS=Danio rerio OX=7955 GN=sdcbp2 PE=1 SV=1	sdcbp2	1	0	0	0	0	2.25511e+06	0	0	0	0	0	0	0	1.36026e+06	0	713627	327106	164230	599205	458913	2.57006e+06	134197	0.147042	1.19449	-0.649834	651396	220287	672031	479844	288627	187023	-0.132745	0.117348	-0.555493	1.25155e+06	1.31848e+06	766837	60.5	125	49.6	46.7	27.1	2.9	0.613	-1.62	0.396	1.42
A0A0R4IJT7	Hexokinase 1 OS=Danio rerio OX=7955 GN=hk1 PE=1 SV=1	hk1	28	2.8612e+08	2.21868e+08	8.7691e+08	2.0672e+08	3.3196e+08	1.05092e+09	5.72176e+08	8.87631e+08	9.6871e+08	4.45773e+08	6.40668e+08	4.70826e+08	8.01092e+08	645321159	5.79082e+08	3.20636e+08	2.37351e+08	7.65288e+08	4.12243e+08	3.0198e+08	1.1295e+09	0.10914	0.104588	0.16906	5.59412e+08	5.23835e+08	5.36855e+08	6.85943e+08	4.12941e+08	8.11248e+08	0.0885565	-0.103306	0.179297	7.14784e+08	6.54716e+08	6.61265e+08	64.3	73.1	3.33	32	4.87	1.39	0.61	1.18	0.598	1.22
X1WFZ4	Parvin, beta (Fragment) OS=Danio rerio OX=7955 GN=parvb PE=4 SV=1	parvb	1	0	0	0	0	1.86896e+06	0	0	4454082	2.67555e+06	774542	3.33143e+06	0	0	0	2.05293e+06	513633	461085	774841	897158	2.12641e+06	281601	0.242217	0.663865	-0.439579	1.27468e+06	2.87863e+06	1.65758e+06	1.06126e+06	2.4747e+06	2.54176e+06	-0.0795759	-0.0656646	0.185658	267102	222757	2.21848e+06	28.8	85.3	43.2	41.3	126	1.89	0.608	1.05	0.938	3.32
F1RCH4	Notch 2 OS=Danio rerio OX=7955 GN=notch2 PE=4 SV=1	notch2	2	555805	0	0	0	0	0	5.44556e+06	1.07047e+07	7.21415e+06	1.2208e+06	4.01816e+06	1.43227e+06	2.36731e+06	2.78886e+06	1249820	1.39577e+06	361973	446683	1.34973e+06	384434	1.14692e+06	-0.0145654	0.0261467	0.409534	5.15917e+06	6.87641e+06	4.42637e+06	2.41278e+06	3.012e+06	4.0045e+06	-0.330062	-0.358507	-0.0435001	3.02989e+06	2.80147e+06	1.6781e+06	78.1	53	22.9	25.6	28.9	1.31	0.604	-1.75	0.0461	7.47
A0A0H2UKN4	Utrophin OS=Danio rerio OX=7955 GN=utrn PE=1 SV=1	utrn	47	3.81882e+08	4.53698e+08	1.04447e+09	2.21633e+09	3.39116e+08	8.12962e+08	1.15008e+09	1.29333e+09	1.28329e+09	4.72465e+08	1.57291e+09	1.63818e+09	1.36697e+09	1.12123e+09	1.00883e+09	4.42014e+08	4.81201e+08	9.88947e+08	4.12981e+09	2.63068e+08	8.62314e+08	0.970495	-0.262259	-0.0595073	1.09056e+09	7.62855e+08	6.95803e+08	7.3266e+08	1.03965e+09	2.92263e+09	-0.172745	0.134444	0.623288	1.23893e+09	1.14123e+09	1.1486e+09	47.9	119	24.9	75.8	4.63	2.75	0.603	1.84	0.396	1.33
Q7ZVB5	Small nuclear ribonucleoprotein D3 polypeptide,-like OS=Danio rerio OX=7955 GN=snrpd3l PE=1 SV=1	snrpd3l	1	2.80307e+06	2374966	5.78707e+06	2.33482e+06	0	4.18957e+06	730348	0	0	810137	1.2144e+06	2616399	1.51149e+06	1.47769e+06	2.08927e+06	3.03667e+06	2.41387e+06	5.26211e+06	3.56002e+06	1.04673e+06	4.32124e+06	0.0690549	-0.362878	-0.0855515	695719	391231	93024	1.1112e+06	920296	3.81579e+06	0.203357	0.371495	1.61299	1.38983e+06	1.4844e+06	2.25796e+06	41.9	57.6	76.6	83.1	27.8	-1.2	0.601	4.96	0.0931	-9.08
F1QNB1	Ankyrin 3a OS=Danio rerio OX=7955 GN=ank3a PE=1 SV=2	ank3a	86	9.36485e+08	1.39374e+09	1.14883e+09	8.97179e+08	2.65928e+09	6.32933e+08	4.04398e+09	6257803982	6.09523e+09	1.07531e+09	3.91489e+09	8.45429e+08	2.58239e+09	2293233386	2.21801e+09	1.09998e+09	1.42929e+09	1.1322e+09	2.23789e+09	2.04338e+09	7.49777e+08	0.308454	0.155229	-0.178991	3.84713e+09	3.71531e+09	3.33322e+09	1.60592e+09	2.69887e+09	2.88592e+09	-0.379413	-0.138813	-0.0625786	2.38558e+09	2.35537e+09	2.445e+09	14.9	48.2	7.35	28.8	1.9	1.37	0.6	-1.52	0.131	2.98
Q6NYQ7	Nicotinamide nucleotide transhydrogenase OS=Danio rerio OX=7955 GN=nnt PE=1 SV=1	nnt	19	1.18511e+08	1.60399e+08	3.95843e+08	1.52878e+08	2.62703e+08	2.50767e+08	3.73528e+08	6.90455e+08	5.34211e+08	1.80198e+08	4.61445e+08	1.51045e+08	4.34516e+08	3.92487e+08	395834249	1.43709e+08	1.62532e+08	3.55277e+08	2.73912e+08	2.02908e+08	2.5584e+08	0.280128	0.0963611	-0.142599	3.69609e+08	4.1453e+08	2.96018e+08	2.75394e+08	3.05683e+08	2.84684e+08	-0.127788	-0.132285	-0.0169553	4.07069e+08	4.03337e+08	4.24801e+08	53.1	15.1	16.6	5.38	2.79	1.11	0.598	-1.25	0.155	1.63
F8W480	Ankyrin 3a (Fragment) OS=Danio rerio OX=7955 GN=ank3a PE=4 SV=1	ank3a	1	0	0	0	0	4.5367e+06	0	1.95843e+06	4301708	7.18205e+06	924997	2286493	0	0	1336844	0	511098	415809	405566	238649	1.11837e+06	782714	-0.330745	0.429694	0.285542	1.85897e+06	2.78292e+06	4.3096e+06	1.27265e+06	1.71118e+06	2.44704e+06	-0.164562	-0.211204	-0.245796	459911	1.34287e+06	834181	13.1	62.2	41.5	32.8	50.4	1.61	0.593	-1.65	0.2	6.72
F1QGT2	Anion exchange protein OS=Danio rerio OX=7955 GN=slc4a10a PE=1 SV=2	slc4a10a	2	818986	2.53703e+06	2.11409e+06	874540	5183706	1.39001e+06	6.69228e+06	9.28839e+06	1.03976e+07	3.90436e+06	9.67813e+06	4460966	2.76236e+06	1.88204e+06	2.6771e+06	2.16338e+06	2.57693e+06	1.94228e+06	1.63649e+06	6.48197e+06	2.25156e+06	-0.121219	0.400604	0.0641717	6.59878e+06	5.97589e+06	6.34442e+06	5.47589e+06	7.11368e+06	6.51019e+06	-0.0810096	0.0756923	0.0112019	2.8642e+06	2.32082e+06	3.15323e+06	14.5	76.3	4.97	13	15.2	1.55	0.593	1.01	0.96	2.83
F1R6I1	Cytochrome c oxidase subunit IV isoform 1,-like OS=Danio rerio OX=7955 GN=cox4i1l PE=1 SV=2	cox4i1l	2	3.55046e+06	5.69412e+06	1.41958e+07	5363711	3398057	4266981	4.73439e+06	12526232	7.00986e+06	6.7359e+06	1.77688e+07	3.30765e+06	9.45627e+06	1.32099e+07	7069298	4.07711e+06	6.32602e+06	1.28849e+07	8.97722e+06	3.86284e+06	4.53198e+06	0.342789	-0.214224	-0.453795	4.67199e+06	8.18908e+06	4.3174e+06	9.56685e+06	1.29439e+07	7.92837e+06	0.311267	0.198829	0.263962	8.63312e+06	1.32763e+07	1.18069e+07	59	48	37.4	25.2	21.1	-1.34	0.589	1.77	0.081	-1.36
A0A0R4IT09	Pyruvate dehydrogenase E1 component subunit alpha OS=Danio rerio OX=7955 GN=pdha1a PE=1 SV=1	pdha1a	7	2.32156e+09	2.29569e+09	6.13387e+09	1272616574	4.56259e+08	6.04755e+09	3.73177e+09	3.11403e+09	1.99524e+09	2.98676e+09	2.8905e+09	3.26954e+09	3.25882e+09	2.81816e+09	2892797836	2.60837e+09	2.35637e+09	5.34164e+09	2.31881e+09	5.34887e+08	6.38928e+09	-0.0511033	-0.643981	0.0777772	3.45015e+09	1.6765e+09	1.00437e+09	4.9768e+09	1.88257e+09	5.72148e+09	0.159113	0.0503466	0.755614	2.86636e+09	2.83877e+09	3.24897e+09	48.2	97.4	61.8	48.5	7.68	-1.12	0.587	2.05	0.213	-1.68
Q6DGM9	NADH dehydrogenase (ubiquinone) 1 alpha subcomplex, 7 OS=Danio rerio OX=7955 GN=ndufa7 PE=1 SV=1	ndufa7	4	11708985	9254391	1.84864e+07	1.30959e+07	1.05405e+07	1.27269e+07	2.11347e+07	39751938	2.45391e+07	4.8576e+06	34786101	6.16571e+06	2.37336e+07	19738701	1.13849e+07	1.35659e+07	1.06074e+07	1.74515e+07	2.12877e+07	1.25247e+07	1.38899e+07	0.19568	0.0721573	-0.0991355	1.99764e+07	2.50175e+07	2.20703e+07	8.44093e+06	2.02901e+07	1.48268e+07	-0.374126	-0.0909602	-0.17276	2.16351e+07	2.01844e+07	1.72763e+07	24.7	29.7	11.3	40.8	11.3	1.15	0.583	-1.54	0.191	1.61
F1Q6P3	Collagen, type VI, alpha 1 OS=Danio rerio OX=7955 GN=col6a1 PE=1 SV=2	col6a1	7	8.29864e+06	1.15829e+06	3.0191e+06	1.1339e+06	1.5475e+07	619555	8.84475e+06	1.50193e+07	1.13403e+08	9.64758e+06	1.38853e+06	1.90462e+06	9.87092e+06	1.03912e+07	1.00211e+07	1.0626e+07	5.93181e+06	6.17684e+06	4.78381e+06	1.04625e+07	4.18427e+06	-0.346596	0.246446	-0.169147	1.91822e+07	2.04013e+07	5.53119e+07	3.2362e+06	3.61e+06	5.77373e+06	-0.772863	-0.752152	-0.981362	1.04674e+07	1.12334e+07	1.47408e+07	34.9	53.5	64.9	32.6	18.8	-1.17	0.583	-7.52	0.0156	4.17
Q6PC49	Zgc:73107 OS=Danio rerio OX=7955 GN=ndufa13 PE=2 SV=1	ndufa13	1	0	0	0	0	1.60558e+06	0	1.27171e+06	8.23699e+06	6664532	0	5.16345e+06	0	1.54797e+06	3.07208e+06	2.95168e+06	879272	179700	653019	199743	1.82426e+06	1.30267e+06	-0.643651	1.00654	0.299909	1.209e+06	5.23098e+06	4.00875e+06	135177	3.80245e+06	107604	-0.951523	-0.13852	-1.57118	1.42317e+06	3.08674e+06	3.19588e+06	62.6	74.8	59.2	158	38.7	1.94	0.582	-2.58	0.211	6.1
Q6NYS8	Dolichyl-diphosphooligosaccharide--protein glycosyltransferase 48 kDa subunit OS=Danio rerio OX=7955 GN=ddost PE=2 SV=2; Duplicate proteins: A0A0R4I9F5|A0A0R4I9F5_DANRE	ddost	1	0	0	0	0	0	2851315	0	0	3.94816e+06	4222750	0	0	0	0	0	527822	390121	178978	355544	188798	2.93863e+06	-0.171595	-0.315201	1.21534	150244	233211	2.4154e+06	332930	715441	1.17772e+06	0.345555	0.486826	-0.311949	195943	287674	972870	48.1	133	138	57	87.4	3.18	0.581	-1.26	0.702	2.55
F1R007	Propionyl CoA carboxylase, beta polypeptide OS=Danio rerio OX=7955 GN=pccb PE=1 SV=1	pccb	35	5.05459e+08	9.90865e+08	1.19995e+09	3.7965e+08	3.85916e+09	5.07613e+08	8.10556e+08	3.45822e+09	4.43789e+09	1.47618e+09	4.97216e+09	4.49182e+08	2.0981e+09	1.89702e+09	1.75946e+09	5.6897e+08	1.01503e+09	1.01733e+09	9.02887e+08	4.3997e+09	5.2691e+08	0.200544	0.636944	-0.285725	7.52047e+08	2.02546e+09	2.39758e+09	2.22979e+09	3.40501e+09	9.98108e+08	0.472018	0.225593	-0.380595	1.89244e+09	1.9098e+09	1.9647e+09	29.8	110	50	54.4	1.96	2.24	0.581	1.28	0.658	1.99
B3DHH0	Zgc:194249 protein OS=Danio rerio OX=7955 GN=cast PE=2 SV=1	cast	51	1.34607e+09	1.46261e+09	1.4789e+09	1.18334e+09	1.0977e+09	1.43295e+09	1.57506e+09	2.25086e+09	2.31895e+09	7.44755e+08	2.23262e+09	1.28702e+09	1.69725e+09	1.51124e+09	1.35022e+09	1.48566e+09	1.49465e+09	1.30808e+09	1.98776e+09	1.27063e+09	1.4952e+09	0.126444	-0.0705215	0.0580627	1.4883e+09	1.34517e+09	1.29163e+09	1.11261e+09	1.56154e+09	2.02517e+09	-0.126348	0.0647769	0.195322	1.55e+09	1.51245e+09	1.49434e+09	7.36	23.1	7.39	29.1	1.87	1.11	0.58	1.14	0.618	-1.04
Q3B7R0	Cytochrome c-1 OS=Danio rerio OX=7955 GN=cyc1 PE=1 SV=1	cyc1	2	0	0	280150	0	3.59651e+06	362427	1.17716e+06	2.59129e+06	7.30941e+06	1.3159e+06	4.66591e+06	0	2.1045e+06	1.02452e+06	756099	1.04297e+06	529217	1.03061e+06	864444	4.09617e+06	550003	-0.0815338	0.888744	-0.272728	1.44045e+06	2.03238e+06	4.48204e+06	1.80172e+06	3.48998e+06	1.8903e+06	0.0971883	0.234818	-0.374944	1.93906e+06	1.24215e+06	1.76346e+06	33.8	107	60.8	39.7	22	2.12	0.579	-1.11	0.939	3.06
F1QEF5	Mitochondrial ribosomal protein L48 OS=Danio rerio OX=7955 GN=mrpl48 PE=1 SV=1	mrpl48	4	0	0	0	0	7.72868e+06	0	2.0384e+07	3.09446e+07	5.40469e+07	7.30425e+06	1.60752e+07	0	1.82977e+07	1.00406e+07	893639	2.98629e+06	2.2878e+06	1.01569e+06	880277	2.27016e+06	1.60402e+06	-0.530513	-0.00336012	0.198446	2.88437e+07	1.95934e+07	3.43604e+07	1.07603e+07	1.20999e+07	5.65312e+06	-0.428224	-0.209329	-0.78377	1.70748e+07	1.24091e+07	1.53183e+07	47.7	43.9	27	35.8	15.8	-1.32	0.579	-2.9	0.0238	13.2
Q7ZUP5	DnaJ (Hsp40) homolog, subfamily A, member 2 OS=Danio rerio OX=7955 GN=dnaja2 PE=2 SV=1	dnaja2a	3	7.07837e+06	11096431	9.72196e+06	3.27203e+06	2.36766e+07	13071451	9.22265e+06	2.86028e+07	2.99379e+07	8.83114e+06	2.67963e+07	5733791	1.08562e+07	1.03785e+07	9.85237e+06	8.18159e+06	1.17478e+07	9.66645e+06	5.53717e+06	2.74127e+07	1.5539e+07	-0.16955	0.367993	0.206155	1.52232e+07	1.79967e+07	1.77029e+07	1.35134e+07	1.17826e+07	9.73886e+06	-0.0517427	-0.183952	-0.259536	1.08126e+07	1.0649e+07	1.09361e+07	18.2	67.8	8.98	16.2	1.33	1.64	0.578	-1.45	0.0369	1.72
Q8JH37	Vitellogenin 1 (Fragment) OS=Danio rerio OX=7955 GN=vtg1 PE=2 SV=1	vtg1	1	0	0	0	0	9333556	0	2720879	5.62103e+06	18544808	0	8327823	0	5.8672e+06	2.82647e+06	1.80919e+06	730761	1.0299e+06	178745	921268	562738	762362	0.100611	-0.26249	0.629928	2.57964e+06	3.6088e+06	1.07915e+07	650207	339621	1.13231e+06	-0.598507	-1.02637	-0.979116	5.35195e+06	2.83988e+06	1.95377e+06	66.8	24	79	56.5	52.1	1.16	0.576	-8	0.0245	8.76
P13647	Keratin, type II cytoskeletal 5 OS=Homo sapiens GN=KRT5 PE=1 SV=3	KRT5	41	4.05355e+09	2.72993e+09	7.35916e+09	1.8061e+09	1.09498e+09	7.24463e+09	4.1304e+09	3.9279e+09	2.76051e+09	3.46612e+09	4.4061e+09	3.42756e+09	4.42194e+09	3.78419e+09	3.50946e+09	4.49118e+09	3.01922e+09	6.32499e+09	3.17926e+09	1.29235e+09	7.38623e+09	-0.150034	-0.368514	0.067363	3.80951e+09	2.33086e+09	1.4929e+09	5.34656e+09	3.03394e+09	5.60214e+09	0.147205	0.11449	0.574325	3.93836e+09	3.86292e+09	3.91641e+09	35.9	78.9	46.1	30.4	0.993	-1.17	0.576	1.83	0.134	-1.81
Q7SZE3	Lethal(2) giant larvae protein homolog 2 OS=Danio rerio OX=7955 GN=llgl2 PE=1 SV=1; Duplicate proteins: B7ZVM2|B7ZVM2_DANRE	llgl2	15	123850465	9.35156e+07	1.25237e+08	7.72761e+07	1.42035e+08	7.65173e+07	1.90864e+08	3.32338e+08	2.12449e+08	1.17228e+08	2.10546e+08	9.66103e+07	1.29762e+08	1.46231e+08	1.38017e+08	1.43321e+08	1.00442e+08	1.17739e+08	1.32558e+08	1.06506e+08	9.14466e+07	-0.0339011	0.0254608	-0.109754	1.85958e+08	1.98161e+08	1.26019e+08	1.7773e+08	1.43305e+08	2.15134e+08	-0.0196526	-0.140756	0.232274	1.19274e+08	1.48385e+08	1.52734e+08	17.9	18.9	22.7	20.1	13	-1.09	0.575	1.05	0.78	1.41
Q5BL36	Zgc:101523 OS=Danio rerio OX=7955 GN=lrrc1 PE=2 SV=1	lrrc1	1	0	1.38563e+06	0	0	1.32786e+06	0	3.18886e+06	5334773	5.16525e+06	977438	3111709	0	1.3239e+06	1.60106e+06	1.70406e+06	696442	1.40749e+06	325684	982013	1.50616e+06	558709	0.149232	0.0294278	0.234389	3.02159e+06	3.43013e+06	3.13265e+06	1.34653e+06	2.3146e+06	1.48893e+06	-0.351021	-0.170834	-0.323038	1.21829e+06	1.60837e+06	1.83964e+06	67.9	46.7	6.61	30.4	20.2	1.25	0.573	-1.86	0.0537	3.94
F1R0J8	Dihydrolipoamide acetyltransferase component of pyruvate dehydrogenase complex OS=Danio rerio OX=7955 GN=pdhx PE=1 SV=1	pdhx	2	4.46933e+06	5564373	3.11882e+06	4.30671e+06	1.02818e+07	0	7.74258e+06	2.2617e+07	22571266	3.04064e+06	1.10208e+07	1.65806e+06	7731525	8.2427e+06	6847014	5.13822e+06	6.03236e+06	3.07739e+06	6.91441e+06	3.36217e+06	7.49495e+06	0.128942	-0.253868	0.386587	1.44697e+07	1.42293e+07	1.33431e+07	4.72263e+06	8.08464e+06	2.59436e+06	-0.486276	-0.245524	-0.711228	7.06977e+06	8.28294e+06	7.42219e+06	31.9	37.8	4.23	53.9	8.22	1.25	0.573	-2.73	0.0769	2.95
Q6DC60	Protein FAM219A OS=Danio rerio OX=7955 GN=fam219a PE=2 SV=1	fam219a	1	0	0	0	0	800032	0	0	0	0	0	0	0	0	0	0	302010	857769	411217	673981	903358	369654	0.348627	0.0224897	-0.0462756	221439	853358	143157	961249	123332	957799	0.637581	-0.840056	0.825462	975675	443617	343810	56.2	41.3	95.9	70.9	57.8	1.24	0.573	1.68	0.613	-1.29
F1QYW3	Junctional adhesion molecule 3a OS=Danio rerio OX=7955 GN=jam3a PE=4 SV=2	jam3a	3	0	0	0	0	9.32578e+06	0	6.55894e+06	7.54059e+06	1.03593e+07	3.85378e+06	1.04171e+07	0	3.14005e+06	1203803	3.61182e+06	1.69563e+06	1.9587e+06	1.25877e+06	1.14037e+06	1.06612e+07	1.44067e+06	-0.172284	0.735836	0.0586175	6.22317e+06	4.95009e+06	6.35013e+06	5.34725e+06	7.7238e+06	7.16227e+06	-0.0658809	0.193218	0.0522678	3.77765e+06	2.58271e+06	4.22354e+06	21.6	123	13.3	18.4	24	2.7	0.572	1.15	0.379	3.57
E7EZS3	Regulator of G protein-signaling 12b OS=Danio rerio OX=7955 GN=rgs12b PE=4 SV=2	rgs12b	1	0	0	0	0	588118	0	2115457	4430885	3.12919e+06	1.14299e+06	2.92351e+06	0	1.37677e+06	829389	1.15958e+06	937795	529865	581433	149554	662252	925971	-0.797311	0.0968582	0.202097	2.00746e+06	2.86407e+06	1.92883e+06	1.58032e+06	2.1773e+06	6.8108e+06	-0.103902	-0.119065	0.547904	1.26664e+06	832999	1.24928e+06	32.5	68.2	22.9	81.3	22	-1.18	0.572	1.55	0.636	3.32
F1Q742	CD166 antigen homolog A OS=Danio rerio OX=7955 GN=alcama PE=1 SV=2	cblb	2	0	0	0	0	1.52293e+07	0	1678549	3453730	6.31955e+06	7.00183e+06	4779242	0	0	0	0	1.15701e+06	1.82156e+06	546400	1.54659e+06	2.66206e+06	728497	0.126038	0.164774	0.124918	1.8042e+06	2.80631e+06	3.8931e+06	5.01886e+06	3.66599e+06	1.88518e+06	0.444321	0.116056	-0.314944	1.51515e+06	645597	1.47651e+06	54.3	59	36.9	44.6	40.5	1.4	0.569	1.24	0.634	2.41
X1WGM1	Histone H4 (Fragment) OS=Danio rerio OX=7955 GN=zgc:163040 PE=1 SV=1	zgc:163040	9	2.66746e+07	3.88422e+07	2.824e+08	4.97502e+07	7.82285e+07	7.64945e+07	2.93726e+07	85987510	1.27072e+08	55503227	6.16051e+08	6.42541e+07	1.50137e+08	1.25758e+08	1.01257e+08	3.24104e+07	4.26907e+07	2.02646e+08	1.20698e+08	9.31788e+07	8.11228e+07	0.571017	0.338985	-0.397596	4.00177e+07	5.4566e+07	7.31546e+07	8.62006e+07	3.85821e+08	1.00652e+08	0.333258	0.849464	0.138581	1.36779e+08	1.28244e+08	1.23656e+08	103	20.6	29.7	88.5	5.14	1.06	0.564	3.41	0.156	-1.66
F1QI59	Serine/threonine-protein phosphatase OS=Danio rerio OX=7955 GN=ppp1cb PE=1 SV=2	ppp1cb	3	0	0	0	0	1.09294e+07	0	0	1.32838e+07	19657743	4.24624e+06	2.08831e+07	2.38137e+06	9.73757e+06	14057628	7018531	1.43807e+06	1.70581e+06	1.80284e+06	998277	6.95936e+06	2.05129e+06	-0.158528	0.610638	0.0560702	6.79143e+06	9.63602e+06	5.96986e+06	6.81791e+06	1.52852e+07	1.35752e+07	0.00168988	0.200373	0.356782	1.5699e+07	1.41268e+07	1.2597e+07	11.5	95.4	25.8	37.6	11	2.02	0.563	1.59	0.23	4.53
Q5RH26	ATP synthase subunit gamma OS=Danio rerio OX=7955 GN=atp5f1c PE=1 SV=1	atp5f1c	9	7.39724e+07	81312976	1.41717e+08	3.44288e+07	1.5269e+08	6.07458e+07	2.29934e+08	4.10746e+08	435170026	8.47646e+07	230435655	4.44942e+07	1.77242e+08	1.70862e+08	1.69925e+08	8.2815e+07	8.40324e+07	7.56724e+07	9.58082e+07	1.31765e+08	6.42839e+07	0.0632937	0.195355	-0.070835	2.15988e+08	2.46226e+08	2.43844e+08	1.26642e+08	1.51742e+08	1.51016e+08	-0.231852	-0.210228	-0.20809	1.61183e+08	1.73516e+08	1.77288e+08	5.59	34.7	7.14	9.98	4.94	1.2	0.561	-1.64	0.00346	2.91
P08779	Keratin, type I cytoskeletal 16 OS=Homo sapiens GN=KRT16 PE=1 SV=4	KRT16	42	3.13925e+09	1.78412e+09	8.66356e+09	6.85415e+08	6.38705e+08	9.84363e+09	2.13142e+09	3.1237e+09	2013079784	3.35551e+09	2.3976e+09	2.76771e+09	3.34954e+09	3.10913e+09	2.92656e+09	3.47977e+09	1.8705e+09	7.79538e+09	1.25805e+09	7.69245e+08	9.51826e+09	-0.441852	-0.385892	0.0867199	1.99185e+09	1.80962e+09	1.10643e+09	5.2316e+09	1.79256e+09	4.49629e+09	0.419377	-0.00411228	0.608929	3.0019e+09	3.13193e+09	3.23594e+09	69.9	128	28.6	47.2	3.75	-1.14	0.561	2.35	0.128	-2.68
Q7Z794	Keratin, type II cytoskeletal 1b OS=Homo sapiens GN=KRT77 PE=2 SV=3	KRT77	17	3.28412e+09	3.23223e+09	8.73436e+09	1.88926e+09	7.07383e+08	7.36591e+09	4.15561e+09	4.50406e+09	3.12725e+09	4.47598e+09	4.49079e+09	4.67286e+09	4.39162e+09	3.90559e+09	3.69007e+09	3.69732e+09	3.31446e+09	7.40321e+09	3.50849e+09	8.44796e+08	7.68842e+09	-0.0227671	-0.593661	0.0164171	3.84599e+09	2.41564e+09	1.55664e+09	7.45837e+09	2.93341e+09	8.21808e+09	0.287635	0.0843407	0.722582	3.85965e+09	3.94987e+09	4.15058e+09	47	85.9	44.4	46.1	3.74	-1.2	0.561	2.38	0.119	-1.84
A8E566	Ras-related associated with diabetes OS=Danio rerio OX=7955 GN=rrad PE=2 SV=1	rrad	5	0	2.32003e+06	0	0	4.30809e+07	0	71215154	117774433	109466163	2.05549e+07	68485727	0	39184771	26917161	20329194	2.4144e+06	3.95274e+06	3.04048e+06	2.26659e+06	5.32854e+06	695572	-0.027435	0.12971	-0.6406	6.71091e+07	7.25457e+07	6.33067e+07	3.00383e+07	3.8036e+07	1.20564e+07	-0.349106	-0.280417	-0.720232	2.62987e+07	2.78145e+07	2.26885e+07	24.7	85.3	6.86	49.8	10.3	-1.13	0.56	-2.53	0.096	21.6
Q7ZVT2	Pyruvate kinase OS=Danio rerio OX=7955 GN=pkma PE=1 SV=1	pkma	1	0	0	0	0	3.4517e+06	0	3782063	4.30245e+06	7.62328e+06	1.45229e+06	4.57287e+06	0	5.33805e+06	4016198	3.02171e+06	495809	516849	384751	151889	3.94876e+06	1.19841e+06	-0.513789	0.883097	0.493424	3.58149e+06	2.78338e+06	4.56555e+06	2.01917e+06	3.37564e+06	5.91645e+06	-0.248891	0.0837839	0.112568	4.87198e+06	4.03571e+06	3.27212e+06	15.2	111	24.5	52.5	19.7	3.79	0.559	1.03	0.914	7.82
A0A0J9YJ57	PTPRF-interacting protein,-binding protein 1a (liprin beta 1) OS=Danio rerio OX=7955 GN=ppfibp1a PE=1 SV=1	ppfibp1a	15	39904752	4.64064e+07	30252095	72860811	5.92296e+07	3.93653e+07	7.29463e+07	8.77567e+07	8.48051e+07	5.6092e+07	107447129	3.92544e+07	7.72269e+07	5.48444e+07	4.44912e+07	5.14059e+07	3.76143e+07	3.44476e+07	1.32001e+08	2.77395e+07	4.79039e+07	0.409565	-0.132254	0.143211	6.99559e+07	5.70258e+07	5.21282e+07	6.46133e+07	7.96786e+07	9.48171e+07	-0.0345026	0.14527	0.259814	7.28525e+07	6.05564e+07	5.07272e+07	21.9	79.9	15.4	18.9	18.1	1.68	0.558	1.33	0.118	1.45
Q6NSM6	Zgc:85963 OS=Danio rerio OX=7955 GN=epb41l3b PE=2 SV=1	epb41l3b	13	5.46887e+07	7.31239e+07	5.95345e+07	4.23477e+07	1.96902e+08	3.9521e+07	1.24639e+08	1.93309e+08	2.229e+08	6.56242e+07	190950832	3.63486e+07	1.18871e+08	1.03609e+08	1.05415e+08	6.24193e+07	8.04274e+07	5.6862e+07	8.61062e+07	1.72454e+08	4.41648e+07	0.139716	0.33127	-0.109745	1.19284e+08	1.21912e+08	1.2875e+08	9.72347e+07	1.41388e+08	7.60417e+07	-0.0887599	0.0643637	-0.228696	1.09035e+08	1.13537e+08	1.16653e+08	18.5	64.8	3.96	31.8	3.39	1.52	0.558	-1.18	0.394	1.85
B3DKC5	Lamin A OS=Danio rerio OX=7955 GN=lmna PE=1 SV=1	lmna	2	12967087	4.9045e+07	9.6426e+07	36847513	36963728	59667948	3.28612e+07	136481401	2.76128e+07	24389343	129310260	1.12696e+08	5.07352e+07	9.10812e+07	146503776	1.48204e+07	5.02802e+07	7.84465e+07	6.09483e+07	4.36514e+07	6.29724e+07	0.614101	-0.061399	-0.0954233	3.1544e+07	8.02313e+07	1.60114e+07	3.75081e+06	9.05057e+07	1.82108e+08	-0.924792	0.052332	1.0559	4.57318e+07	9.16092e+07	1.65575e+08	66.6	19	78.7	96.8	59.9	1.17	0.557	2.16	0.921	-1.12
A0A0U2ULT4	G protein-coupled receptor 124 OS=Danio rerio OX=7955 PE=2 SV=1	A0A0U2ULT4	1	0	0	0	0	1.13358e+06	0	0	624933	1.1206e+06	0	898199	0	531508	329304	0	1.08444e+06	359854	1.1046e+06	567756	1.28398e+06	128202	-0.281044	0.552433	-0.935311	629884	427150	714070	253954	684749	408509	-0.394505	0.20495	-0.242539	491747	330640	410778	49.9	88.4	25	48.6	19.6	-1.29	0.554	-1.31	0.382	-1.44
A0A0R4IGK4	Stomatin OS=Danio rerio OX=7955 GN=stom PE=1 SV=1	stom	6	1.70826e+06	2284614	373589	554835	3.69342e+07	0	2.56584e+07	38327437	32699416	3.3364e+07	62708982	1.85619e+06	19954620	1.62908e+07	1.72316e+07	4.3418e+06	3.82674e+06	4.52553e+06	1.66473e+06	2.13142e+07	1.07439e+07	-0.416326	0.74584	0.375491	2.53785e+07	2.43258e+07	2.06106e+07	4.81281e+07	4.71326e+07	3.18272e+07	0.277932	0.287254	0.188708	1.97717e+07	1.76213e+07	2.01326e+07	8.56	87.5	10.7	21.6	7.08	2.66	0.551	1.81	0.033	5.54
F1R9C3	Adenylate cyclase OS=Danio rerio OX=7955 GN=adcy6b PE=3 SV=2	adcy6b	15	16916703	18761106	0	0	8.59266e+07	1.59124e+07	1.62879e+08	2.40232e+08	2.86552e+08	3.52857e+07	9.18765e+07	0	4.16856e+07	6.69598e+07	5.96658e+07	2.45767e+07	2.55272e+07	2.91971e+07	9.79229e+06	3.85839e+07	2.0773e+07	-0.39964	0.179403	-0.147841	1.5346e+08	1.60304e+08	1.64252e+08	4.47445e+07	6.88635e+07	7.48024e+07	-0.535256	-0.366955	-0.341596	6.18333e+07	7.1942e+07	6.65837e+07	9.23	63	3.43	25.3	7.57	-1.15	0.551	-2.54	0.0252	6.03
A5PMJ7	Syntaxin 12 OS=Danio rerio OX=7955 GN=stx12 PE=1 SV=1	stx12	5	5536393	4514694	1.43604e+07	1.47695e+06	3.15522e+07	796038	5.47617e+07	3.60711e+07	38803539	2.66911e+07	4.76814e+07	3.40088e+06	3.71411e+07	2.27265e+07	2.74427e+07	7.46131e+06	6.28914e+06	1.5416e+07	3.27616e+06	2.24649e+07	1.9039e+06	-0.35745	0.552914	-0.908327	5.19344e+07	2.34394e+07	2.326e+07	2.85828e+07	3.46401e+07	4.7593e+07	-0.25935	0.169632	0.310934	3.45235e+07	2.41343e+07	3.1041e+07	51.1	125	50.2	26.3	17.7	-1.06	0.55	1.12	0.615	3.38
F1QNV8	Protein tyrosine phosphatase, receptor type, K (Fragment) OS=Danio rerio OX=7955 GN=ptprk PE=1 SV=1	ptprk	1	1.78976e+07	19096203	17012963	14014878	1.07896e+07	1.35021e+07	15215424	2.17092e+07	2.00962e+07	1.13954e+07	1.95221e+07	16745159	1.72788e+07	1.85925e+07	1.3445e+07	1.95838e+07	1.94539e+07	1.53681e+07	2.24998e+07	1.24696e+07	1.39595e+07	0.0602807	-0.193152	-0.0417501	1.43365e+07	1.34109e+07	1.1664e+07	1.66199e+07	1.40029e+07	2.56069e+07	0.0641841	0.01876	0.341511	1.56613e+07	1.86919e+07	1.46756e+07	13.2	33.2	10.3	32.5	12.8	-1.11	0.55	1.43	0.204	-1.38
A9JR97	LOC792623 protein (Fragment) OS=Danio rerio OX=7955 GN=dusp27 PE=2 SV=1	dusp27	2	4.61351e+06	6.09498e+06	1.60892e+06	0	2.30359e+06	6.32045e+06	3700787	0	0	0	0	0	0	1.86359e+06	3.60889e+06	5.30222e+06	6.19683e+06	1.68265e+06	506842	2.72443e+06	6.95967e+06	-1.01959	-0.356894	0.616594	3.88084e+06	766153	1.0568e+06	531863	678317	631511	-0.863126	-0.052883	-0.223614	2.75225e+06	2.41804e+06	4.61504e+06	54.4	96.5	90.5	12.2	36.3	-1.29	0.55	-3.1	0.218	-2.31
F1QUE3	Ubiquinol-cytochrome c reductase core protein 1 OS=Danio rerio OX=7955 GN=uqcrc1 PE=1 SV=1	uqcrc1	11	1.957e+09	1.6012e+09	7.15532e+09	13955495510	8.7354e+08	6.60042e+09	7.39948e+09	6.79053e+09	8.04521e+09	3.30134e+09	9.47095e+09	11285735872	9281805775	7.79185e+09	5.97431e+09	2.198e+09	1.62514e+09	6.23462e+09	2.73789e+10	1.00109e+09	6.91092e+09	1.09539	-0.21042	0.0447256	6.83749e+09	3.61548e+09	3.89348e+09	5.44319e+09	6.01195e+09	2.03736e+10	-0.0990434	0.220849	0.718729	8.12869e+09	7.85652e+09	6.72486e+09	74.9	118	37.3	79.7	9.83	3.51	0.548	2.22	0.267	1.43
Q1ECU7	Junctophilin 1b OS=Danio rerio OX=7955 GN=jph1b PE=2 SV=1	jph1b	3	0	8732963	9.01355e+06	4.43626e+06	3.08481e+07	5.47746e+06	1.41668e+07	9.64549e+06	2.16895e+07	1.30052e+07	2.30951e+07	7.74475e+06	0	1.16115e+07	6.64662e+06	9.52164e+06	9.8043e+06	8.68409e+06	1.10835e+07	3.56882e+07	6.19853e+06	0.0659636	0.561108	-0.146436	1.36041e+07	1.29836e+07	1.3243e+07	1.8849e+07	1.68753e+07	1.18007e+07	0.14162	0.113855	-0.0500783	6.91835e+06	1.24477e+07	7.78786e+06	6.24	89.5	2.35	23	32.8	1.89	0.548	1.19	0.381	1.42
Q8JG73	Casein kinase 1, alpha 1 OS=Danio rerio OX=7955 GN=csnk1a1 PE=1 SV=1	csnk1a1	9	4.9953e+07	6.57733e+07	8.37964e+07	3.73651e+07	5.24523e+07	7.33852e+07	5.29461e+07	1.03801e+08	7.88212e+07	2.40779e+07	83813035	4.25198e+07	7.08483e+07	6.03473e+07	5.74844e+07	5.59979e+07	6.7385e+07	7.60839e+07	7.53556e+07	6.23531e+07	7.59834e+07	0.128944	-0.0337054	-0.000574416	5.25681e+07	6.47447e+07	4.66648e+07	3.77565e+07	6.09886e+07	6.36971e+07	-0.143731	-0.0259558	0.13513	6.47395e+07	6.25305e+07	6.36953e+07	15.1	10.8	16.9	26.3	1.74	1.07	0.548	-1.01	0.899	-1.22
Q6P043	Fructose-bisphosphate aldolase OS=Danio rerio OX=7955 GN=aldoab PE=1 SV=1	aldoab	1	0	0	0	2.92353e+06	0	0	0	0	0	0	0	4.90616e+06	0	1.96645e+06	0	1.0887e+06	801699	373408	4.48657e+06	348992	1.08889e+06	0.615006	-0.361196	0.4648	397421	869486	103444	288218	242747	526153	-0.13953	-0.554108	0.706409	1.03672e+06	1.97556e+06	193824	47.7	112	84.6	43.2	83.4	2.62	0.547	-1.3	0.989	-1.65
A0A0R4IS05	Nucleoside diphosphate kinase OS=Danio rerio OX=7955 GN=nme3 PE=1 SV=1	nme3	1	873838	0	0	0	0	4.91235e+06	0	0	0	2.13881e+06	7.27801e+06	0	7.07794e+06	0	0	940729	242680	881336	175725	945573	324081	-0.728631	0.590661	-0.434488	1.01677e+06	544594	314767	3.00052e+06	5.32336e+06	1.8035e+06	0.469973	0.990113	0.758126	394307	484630	716942	56.2	84.8	57.2	53	31.3	-1.43	0.543	5.4	0.0212	-1.1
Q7SXU7	DEAD (Asp-Glu-Ala-Asp) box polypeptide 39B OS=Danio rerio OX=7955 GN=ddx39b PE=1 SV=1	ddx39b	3	4.65802e+06	4702892	8.29082e+06	8.45883e+06	1.92522e+07	5.40693e+06	1.40354e+07	25559276	3.60063e+07	14408422	2.45729e+07	3.47813e+06	1.14536e+07	1.74716e+07	2.44882e+07	5.70813e+06	5.19911e+06	8.42771e+06	1.43343e+07	5.94561e+06	5.81998e+06	0.399883	0.058268	-0.160788	1.86544e+07	1.62101e+07	2.12148e+07	2.11287e+07	1.79696e+07	2.0147e+07	0.0540914	0.0447527	-0.0224282	1.09385e+07	1.78255e+07	2.06538e+07	26.9	56.1	13.4	8.19	30.3	1.35	0.542	1.06	0.562	2.9
A0A140LGY9	Potassium inwardly-rectifying channel, subfamily J, member 14 OS=Danio rerio OX=7955 GN=kcnj14 PE=3 SV=1	kcnj	4	0	0	0	0	2.87319e+06	0	1.03515e+07	2.90022e+07	2.16621e+07	2.57214e+06	1.11188e+07	0	8.68619e+06	869146	3.18026e+06	1.38449e+06	2.17488e+06	1.30797e+06	1.00264e+06	4.19848e+06	2.3916e+06	-0.140143	0.285657	0.26209	1.71396e+07	1.83363e+07	1.30199e+07	3.95724e+06	8.26742e+06	3.31993e+06	-0.636608	-0.345943	-0.593479	8.68961e+06	4.59414e+06	4.91734e+06	29.6	63.3	17.3	51.9	37.5	1.56	0.541	-3.12	0.0365	9.96
F1Q6R2	Si:dkey-8k3.2 (Fragment) OS=Danio rerio OX=7955 GN=si:dkey-8k3.2 PE=4 SV=2	c4b	1	0	0	0	0	2906390	0	0	0	0	720673	0	0	0	0	0	179991	671191	518405	712562	3.31981e+06	185011	0.597572	0.694267	-0.447472	289367	240767	114326	985803	913204	184332	0.532341	0.578971	0.207455	240389	339349	400702	55.1	119	42.1	63.8	24.8	3.08	0.536	3.23	0.199	-2.13
A0A0R4ILL7	Adenylosuccinate synthetase isozyme 1 OS=Danio rerio OX=7955 GN=adssl1 PE=1 SV=1	adssl1	2	1.14462e+06	2.30159e+06	2.20381e+06	0	5.00982e+06	1.72561e+06	3.66855e+06	5125626	9.14666e+06	1.19285e+06	2.83711e+06	1.39537e+06	1.62651e+06	2.36268e+06	4157705	1.51629e+06	2.58698e+06	2.02342e+06	1.77537e+06	5.71509e+06	1.87902e+06	0.0685078	0.34423	-0.0321536	3.48186e+06	3.36526e+06	5.559e+06	2.69466e+06	2.14334e+06	3.11963e+06	-0.111307	-0.195928	-0.250893	2.72306e+06	2.37329e+06	4.4941e+06	26.2	71.9	29.8	18.5	35.6	1.53	0.535	-1.56	0.103	2.02
B6EUL7	CASKb OS=Danio rerio OX=7955 GN=caskb PE=2 SV=1	caskb	2	0	0	0	0	5908945	0	0	8.9992e+06	0	0	5.96262e+06	0	0	0	0	774885	643046	1.04286e+06	634158	6.75062e+06	689899	-0.0870398	1.0211	-0.17944	1.01201e+06	874163	961989	954448	4.60296e+06	1.1867e+06	-0.0254333	0.721445	0.0911726	948541	543695	1.05263e+06	24.8	131	7.35	90.9	31.7	3.28	0.534	2.37	0.344	1.16
F8W5H2	Popeye domain-containing 2 OS=Danio rerio OX=7955 GN=popdc2 PE=1 SV=1	pla1a	25	3.3889e+08	3.09044e+08	3.09683e+08	1.49684e+08	2.2201e+09	1.9531e+08	4.62288e+09	6.96696e+09	6.29879e+09	1.66973e+09	5.31904e+09	1.70805e+08	2.69867e+09	2.28403e+09	2.33986e+09	3.76645e+08	3.45281e+08	2.84681e+08	3.85119e+08	2.33369e+09	2.0985e+08	0.0096625	0.829871	-0.13245	4.30458e+09	3.91476e+09	3.28297e+09	2.58971e+09	3.57951e+09	1.69955e+09	-0.220679	-0.0388811	-0.285934	2.4085e+09	2.3007e+09	2.60225e+09	13.9	121	13.4	35.9	6.27	2.91	0.532	-1.46	0.183	11.4
Q7ZU59	Histone H2A (Fragment) OS=Danio rerio OX=7955 GN=h2afvb PE=2 SV=1	h2afvb	4	21308567	3.05706e+07	1.9483e+08	3.1976e+07	139873244	6.20011e+07	1.49593e+07	8.56e+07	1.26658e+08	1.23682e+08	8.29943e+08	3.78963e+07	135481758	1.24961e+08	121893515	2.36106e+07	3.22279e+07	1.61887e+08	5.27939e+07	1.50752e+08	6.47444e+07	0.349477	0.670033	-0.398011	2.31858e+07	5.20082e+07	7.05428e+07	1.87973e+08	5.60791e+08	1.28065e+08	0.908873	1.03273	0.258977	1.22025e+08	1.26452e+08	1.34964e+08	107	59.8	49.1	80.2	5.15	1.23	0.531	6.02	0.0418	-1.49
D1GJ55	Actn2 OS=Danio rerio OX=7955 GN=actn2b PE=2 SV=1	actn2b	16	2.52542e+07	2.3505e+07	3.30062e+07	1.12645e+07	3.04602e+07	2.38512e+07	1.23336e+07	5.3764e+07	185199869	7.36346e+06	2.1941e+07	1.17615e+07	3.07119e+07	2.7289e+07	2.57959e+07	3.15333e+07	2.33635e+07	3.40441e+07	2.50737e+07	3.92512e+07	3.70636e+07	-0.0995511	0.225316	0.0369055	4.06297e+07	3.74592e+07	7.7667e+07	1.60716e+07	2.00305e+07	2.19336e+07	-0.402786	-0.271867	-0.549126	3.20319e+07	3.05934e+07	3.10044e+07	18.8	22.6	43.1	15.5	2.37	1.14	0.531	-2.68	0.0408	1.75
A0A0R4IWC6	Annexin OS=Danio rerio OX=7955 GN=anxa1a PE=1 SV=1	anxa1a	1	0	0	0	0	3.73543e+06	0	0	0	5435625	1.51824e+06	0	0	0	0	0	212617	331880	422085	99096.4	4.27636e+06	833109	-0.33154	1.11009	0.295302	757485	189730	3.29119e+06	2.11304e+06	363271	876956	0.445534	0.282095	-0.574375	209861	407164	602046	32.6	128	117	80.5	48.3	5.39	0.53	-1.26	0.91	4.38
F1RA35	Microtubule-actin crosslinking factor 1a OS=Danio rerio OX=7955 GN=macf1a PE=1 SV=2	macf1a	8	1.16814e+07	1.68798e+07	1.21596e+07	9.18818e+06	0	1.21284e+07	5.58908e+06	1.72217e+06	0	2.76594e+06	0	1.12633e+07	7.81213e+06	6.72552e+06	5.50518e+06	1.33086e+07	1.71571e+07	1.56299e+07	1.70252e+07	1.12449e+07	1.38715e+07	0.106961	-0.183486	-0.0518331	8.19776e+06	5.27315e+06	6.94766e+06	7.24601e+06	5.32877e+06	1.8869e+07	-0.053596	0.00455726	0.433911	9.64562e+06	9.74576e+06	9.42635e+06	12.6	20.6	21.6	69.9	1.7	-1.09	0.53	1.54	0.526	-2.26
A0A140LGK3	Si:ch211-59p23.1 OS=Danio rerio OX=7955 GN=si:ch211-59p23.1 PE=1 SV=1	si:ch211-59p23.1	1	0	0	1.3535e+06	0	0	0	0	0	0	0	704760	773295	0	0	0	418678	635129	1.24169e+06	668929	206803	797307	0.203499	-0.487305	-0.192386	987727	180125	793521	3.6238e+06	539865	1.09322e+06	0.564528	0.47671	0.13915	333212	653108	841452	55.8	55.7	64.5	93.8	42.2	-1.37	0.53	2.68	0.305	-1.17
Q5RHJ3	Dishevelled-associated activator of morphogenesis 1b OS=Danio rerio OX=7955 GN=daam1b PE=1 SV=1	daam1b	14	4.73449e+07	5.23746e+07	1.09652e+07	1.41428e+06	201343193	1.04095e+07	8.52998e+07	1.53888e+08	1.34757e+08	8.86071e+07	2.08525e+08	5134045	5.90025e+07	5.39897e+07	3.85633e+07	5.7438e+07	5.74815e+07	1.4169e+07	2.4988e+07	3.61192e+07	1.72948e+07	-0.361467	-0.20179	0.0865766	8.40514e+07	9.74331e+07	7.96836e+07	1.29094e+08	1.48837e+08	1.46209e+08	0.186361	0.184006	0.263604	5.54189e+07	6.05543e+07	4.75683e+07	58.1	36.2	10.6	7.58	12	-1.65	0.53	1.62	0.00381	2.02
A0A0R4IAS5	ATP-binding cassette, sub-family C (CFTR/MRP), member 9 OS=Danio rerio OX=7955 GN=abcc9 PE=4 SV=1	abcc9	6	0	534821	0	457494	9.89923e+06	246941	2.45023e+07	4.03715e+07	3.83175e+07	3.83982e+06	1.08814e+07	0	1.37821e+07	1.23764e+07	7.08872e+06	3.3642e+06	3.86762e+06	3.34693e+06	4.55704e+06	1.14024e+07	2.37046e+06	0.131802	0.469554	-0.149815	2.31885e+07	2.57227e+07	2.29896e+07	5.81085e+06	9.06457e+06	1.28583e+07	-0.601033	-0.45297	-0.25235	1.26322e+07	1.31739e+07	1.08425e+07	8.39	77.1	6.36	38.2	9.99	1.73	0.527	-2.59	0.0457	6.8
A0A0G2L6L8	EPH receptor B3 OS=Danio rerio OX=7955 PE=1 SV=1	sb:eu779	3	0	0	0	1.72212e+06	0	0	9.72991e+06	2.43911e+07	9.60674e+06	3.76104e+06	8.0218e+06	3040729	8.61585e+06	0	1.04559e+06	1.663e+06	700781	908090	3.42012e+06	1.88879e+06	577682	0.313149	0.430602	-0.19644	1.3959e+07	1.54164e+07	9.50343e+06	6.01721e+06	6.05721e+06	5.33982e+06	-0.365458	-0.40571	-0.250354	3.33545e+06	2.10662e+06	1.86102e+06	46.4	72.5	23.8	6.94	32.5	1.8	0.524	-2.23	0.0266	11.9
Q4VBU0	2-oxoisovalerate dehydrogenase subunit alpha OS=Danio rerio OX=7955 GN=bckdha PE=1 SV=1	bckdha	5	957554	0	3.74746e+06	1.94572e+06	2.8175e+06	3.14693e+06	2.05426e+06	3.53262e+07	1.6511e+07	3.61727e+06	8.36343e+06	1.0561e+06	1.95188e+06	4.62034e+06	1.15959e+07	2.9054e+06	2.91499e+06	5.13443e+06	3.34827e+06	6.41902e+06	3.62576e+06	0.061614	0.342831	-0.151093	1.55104e+07	2.24701e+07	1.01269e+07	6.79113e+06	8.12071e+06	4.35068e+06	-0.358682	-0.442011	-0.36692	5.98931e+06	5.47683e+06	1.25419e+07	35.2	38	38.6	29.8	49.2	1.22	0.524	-2.5	0.0411	4.39
Q7ZUZ7	ADP-ribosylation factor 1 OS=Danio rerio OX=7955 GN=arf2b PE=1 SV=1	arf2b	10	6.33756e+06	1.75281e+07	2.07571e+07	4.49976e+06	6.35598e+07	1.52912e+07	100383883	1.61175e+08	1.25609e+08	6.7856e+07	1.83099e+08	1.33921e+07	7.68143e+07	38124613	5.05933e+07	1.19628e+07	1.57398e+07	1.60469e+07	1.49608e+07	4.9386e+07	1.15453e+07	0.0971202	0.496604	-0.142988	9.51628e+07	1.01507e+08	7.40325e+07	9.95184e+07	1.30842e+08	1.05495e+08	0.0194362	0.110254	0.153808	7.45674e+07	5.59759e+07	5.6307e+07	15.6	82.7	15.9	14.9	17.1	1.73	0.523	1.24	0.164	6.19
E7F3I8	DEAH (Asp-Glu-Ala-His) box helicase 15 OS=Danio rerio OX=7955 GN=dhx15 PE=1 SV=1	dhx15	1	2168635	2.84942e+06	3444714	2.24924e+06	487842	2849320	0	0	0	0	820321	1.85427e+06	774008	993104	897944	2.34611e+06	2.89668e+06	3.14217e+06	3.42585e+06	548418	2.93657e+06	0.164419	-0.722789	-0.0293894	1.02117e+06	474655	746731	723338	626501	2.68062e+06	-0.149756	0.120544	0.555072	714520	997483	966082	14.6	66.8	36.6	86.3	17.4	-1.21	0.523	1.8	0.491	-3.74
A0A0R4IBH9	Si:dkey-279j5.1 OS=Danio rerio OX=7955 GN=si:dkey-279j5.1 PE=4 SV=1	si:dkey-279j5.1	1	1.13664e+07	6.98293e+06	7841998	7.09135e+06	6.28471e+06	3.09837e+06	6222284	6.24704e+06	8309786	4.70924e+06	7.94992e+06	8731217	8425142	9.84699e+06	1.12473e+07	1.24069e+07	7.1058e+06	7.1174e+06	1.11637e+07	7.22833e+06	3.19379e+06	-0.0458565	0.00742461	-0.348016	5.88175e+06	3.99865e+06	4.96283e+06	6.72879e+06	5.80466e+06	1.31317e+07	0.0584304	0.161863	0.422591	7.66887e+06	9.89765e+06	1.22651e+07	34.4	55.4	19	46.6	23.1	-1.23	0.523	1.73	0.178	-1.79
Q6DGU9	Glutathione S-transferase kappa OS=Danio rerio OX=7955 GN=gstk1 PE=1 SV=1	gstk1	4	1.50064e+06	9.60815e+06	3.87547e+06	0	4725300	0	0	8.46306e+07	6.90825e+07	2611207	6.52438e+06	706173	0	7018544	9.69204e+06	2.72754e+06	6.08006e+06	4.30615e+06	2.79784e+06	6.00303e+06	1.66549e+06	0.0110523	-0.00553723	-0.412546	7.27347e+07	5.12618e+07	3.95134e+07	4.70508e+06	8.12302e+06	2.60897e+06	-1.18917	-0.800076	-1.18028	1.11109e+07	9.10788e+06	1.09848e+07	38.4	64.5	30.9	54.1	10.8	-1.25	0.523	-10.6	0.00678	12.5
F1QHB6	Smoothelin b OS=Danio rerio OX=7955 GN=smtnb PE=4 SV=2	smtnb	1	0	0	0	0	849171	0	0	0	0	0	0	0	0	0	0	454576	748833	1.01055e+06	641436	959354	136130	0.149547	0.107594	-0.870603	762724	773686	102872	393652	522214	1.06399e+06	-0.287256	-0.170716	1.01464	447540	947475	752482	37.7	71.7	70.3	53.9	35.2	-1.27	0.522	1.21	0.604	-1.35
H1ZXA6	Ryanodine receptor 2b protein (Fragment) OS=Danio rerio OX=7955 GN=ryr2b PE=2 SV=1	ryr2b	17	1.32322e+08	1.04553e+08	1.09931e+08	8.06074e+07	1.02678e+09	5.11326e+07	1.1945e+09	1.93949e+09	1.72436e+09	3.38613e+08	1.39594e+09	4.55075e+07	6.80931e+08	6.33472e+08	5.91757e+08	1.00716e+08	1.12102e+08	1.07247e+08	1.45798e+08	1.03427e+09	5.78227e+07	0.160652	0.96502	-0.268286	1.10883e+09	1.10261e+09	9.08004e+08	5.18644e+08	9.43947e+08	3.14306e+08	-0.329995	-0.0674726	-0.460736	6.11074e+08	6.39305e+08	6.58415e+08	5.36	131	11	54.2	3.74	3.87	0.52	-1.76	0.169	9.75
Q6P0V6	60S ribosomal protein L8 OS=Danio rerio OX=7955 GN=rpl8 PE=2 SV=3	rpl8	1	0	1.86338e+06	3.60436e+06	0	7.03764e+06	1.19203e+06	0	0	8.73456e+06	1.0241e+06	0	1.43136e+06	2.51847e+06	2934689	3223161	1.79596e+06	1.8934e+06	3.28688e+06	4.20771e+06	8.10249e+06	1.22636e+06	0.36975	0.631377	-0.428164	355298	409601	772748	1.41234e+06	1.54139e+06	2.05561e+06	0.599347	0.575552	0.424902	2.30879e+06	2.94865e+06	3.49147e+06	35.9	76.4	44.3	20.4	20.3	1.94	0.518	3.26	0.0209	-4.54
B0S7B8	Anion exchange protein OS=Danio rerio OX=7955 GN=slc4a2a PE=3 SV=1	slc4a2a	9	0	0	0	0	3.04769e+07	0	1.26271e+07	3.4747e+07	2.84267e+07	5.68328e+06	2.62357e+07	0	5.59635e+06	6.99577e+06	7.38995e+06	4.3529e+06	3.47561e+06	5.31633e+06	7.72364e+06	1.41849e+07	2.45876e+06	0.249043	0.610794	-0.334896	1.90477e+07	2.40453e+07	2.17128e+07	1.07084e+07	2.22949e+07	2.74295e+07	-0.25012	-0.0328242	0.101501	7.53465e+06	9.38901e+06	1.2162e+07	21	72.3	11.6	42.5	24	1.85	0.518	-1.07	0.677	4.93
H9GXQ9	Protein-methionine sulfoxide oxidase mical3a OS=Danio rerio OX=7955 GN=mical3a PE=4 SV=2	mical3a	25	2.08066e+07	2.0952e+07	2.66528e+07	1.40109e+06	4.1498e+07	1.81596e+07	1.34473e+08	2.27806e+08	2.30803e+08	12529293	1.01295e+08	1.14492e+07	6.33668e+07	6.11759e+07	4.25979e+07	3.25757e+07	3.14649e+07	3.60328e+07	1.89431e+07	3.97445e+07	2.95963e+07	-0.235442	0.101451	-0.0854607	1.29719e+08	1.48216e+08	1.32384e+08	2.4438e+07	6.71879e+07	4.39745e+07	-0.724938	-0.343603	-0.478635	6.2382e+07	6.95427e+07	5.93774e+07	7.14	35.3	7.31	47.3	8.19	-1.13	0.518	-3.03	0.0533	4.1
Q6DRD1	ATP synthase oligomycin sensitivity conferral protein OS=Danio rerio OX=7955 GN=atp5po PE=1 SV=1	atp5po	15	1.0001e+08	1.08679e+08	1.04104e+08	7.96219e+07	2.28152e+08	4.71647e+07	1.41533e+08	4.14389e+08	477268852	7.4647e+07	3.07845e+08	5.0173e+07	1.4379e+08	1.67398e+08	1.23355e+08	1.10978e+08	1.14556e+08	1.36119e+08	1.28185e+08	1.93685e+08	1.06627e+08	0.0626006	0.228079	-0.106048	1.98958e+08	2.54058e+08	2.73453e+08	1.10541e+08	2.08956e+08	9.64501e+07	-0.255236	-0.0848781	-0.452581	1.55401e+08	1.55732e+08	1.54754e+08	11.3	31.7	16	44.2	0.32	1.18	0.514	-1.75	0.111	2.01
A0A0R4ILN7	Flotillin-2a OS=Danio rerio OX=7955 GN=flot2a PE=1 SV=1	flot2a	1	0	0	0	0	2.08951e+06	0	4.09619e+06	3.48152e+06	0	2.86681e+06	3.53119e+06	0	0	2.81359e+06	1623948	757407	199089	168831	1.14989e+06	2.37971e+06	100271	0.181325	1.07748	-0.226277	3.87785e+06	2.26593e+06	2.97024e+06	4.04929e+06	2.62006e+06	3.37872e+06	0.0187878	0.0630643	0.0559606	1.50208e+06	2.82694e+06	1.75271e+06	88.4	94.3	26.6	21.3	34.7	3.23	0.513	1.1	0.626	8.1
A0A0R4IGU8	SET-binding factor 1 OS=Danio rerio OX=7955 GN=sbf1 PE=1 SV=1	sbf1	7	8.98645e+06	3.04266e+06	3.32524e+06	2.42538e+06	8.10574e+06	6.44144e+06	1.43661e+07	3.6764e+07	2.97419e+07	7.28735e+06	2.13413e+07	748522	1.11804e+07	7.28798e+06	9.19013e+06	1.33557e+07	5.52298e+06	5.44812e+06	7.8253e+06	1.20909e+07	8.7933e+06	-0.232167	0.340284	0.207905	1.36301e+07	2.36156e+07	1.81355e+07	1.02941e+07	1.67807e+07	1.28804e+07	-0.121911	-0.148389	-0.148602	1.08608e+07	1.22543e+07	1.09695e+07	56	23.4	27.1	24.5	6.82	1.18	0.513	-1.39	0.206	2.28
E7F1B8	Melanoma cell adhesion molecule b OS=Danio rerio OX=7955 GN=mcamb PE=1 SV=1	mcamb	6	0	0	0	0	2.26599e+08	0	2.31995e+08	349738781	2.77721e+08	1.01519e+08	1.76739e+08	0	119807684	127900561	108973735	2.97736e+06	2.7781e+06	3.37335e+06	2.54512e+06	2.93326e+06	3.12501e+06	-0.0681235	0.0236039	-0.0332101	2.176e+08	2.07857e+08	1.55055e+08	1.51275e+08	1.25185e+08	1.50148e+08	-0.157892	-0.220214	-0.0139645	1.09562e+08	1.29129e+08	1.20747e+08	9.96	10.3	17.4	10.4	8.19	-1.06	0.513	-1.36	0.086	63.6
F1QCX9	Uncharacterized protein OS=Danio rerio OX=7955 PE=4 SV=2	F1QCX9	1	0	0	0	0	2.11914e+06	0	7287875	14538853	9386555	3.19058e+06	12687825	0	5137858	3.84395e+06	4385956	376262	299693	646258	198563	2.41375e+06	874216	-0.277594	0.906016	0.131213	6.88511e+06	9.08468e+06	5.58385e+06	4.51782e+06	9.17873e+06	3.41257e+06	-0.182981	0.00447288	-0.213853	4.69033e+06	3.86257e+06	4.75887e+06	41.3	97.7	24.6	53.7	11.2	2.64	0.512	-1.26	0.427	16.3
Q6PBZ1	Ribosomal protein L7a OS=Danio rerio OX=7955 GN=rpl7a PE=1 SV=1	rpl7a	3	29475189	2.99056e+07	3.37282e+07	3.02307e+07	36854400	2.3362e+07	2.19053e+07	29539898	4.68541e+07	2.4357e+07	4.1966e+07	2.98369e+07	31632146	3.39373e+07	3.09723e+07	3.32381e+07	3.10247e+07	3.13892e+07	4.87432e+07	4.27038e+07	2.51442e+07	0.166278	0.138759	-0.0963419	2.12794e+07	1.88521e+07	2.29924e+07	3.63638e+07	3.02478e+07	4.66658e+07	0.23271	0.205335	0.307414	2.92174e+07	3.44229e+07	3.40967e+07	3.72	31.5	9.89	22	8.95	1.22	0.512	1.79	0.0291	-1.52
F1QIE6	Si:dkey-106c17.3 OS=Danio rerio OX=7955 GN=kcnj19a PE=3 SV=1	kcnj19a	1	0	0	0	0	833880	0	2.7277e+06	5.03764e+06	1.32409e+06	0	1.30636e+06	0	0	0	1.65982e+06	284176	192886	254679	371529	941927	145204	0.116405	0.688716	-0.244015	2.58608e+06	3.24437e+06	839198	394086	988556	121804	-0.817051	-0.51613	-0.838205	612730	273265	1.79164e+06	19.1	84.4	55.9	88.4	89.3	1.99	0.511	-4.43	0.0947	9.11
E7F4G7	Ankyrin 2a, neuronal OS=Danio rerio OX=7955 GN=ank2a PE=1 SV=2	ank2a	28	4.29921e+07	8.62641e+07	5.18044e+07	3.16303e+07	2.18314e+08	1.91604e+07	1.82335e+08	300922354	4.02557e+08	6.55047e+07	2.33196e+08	2.00142e+07	1.66752e+08	1.24593e+08	1.14118e+08	5.47203e+07	8.35506e+07	6.49239e+07	6.71093e+07	1.52762e+08	5.97575e+07	0.0886343	0.262066	-0.0360121	1.9875e+08	1.92486e+08	2.08705e+08	9.72193e+07	1.62267e+08	8.85675e+07	-0.310554	-0.0741695	-0.372259	1.47415e+08	1.29989e+08	1.35302e+08	21.6	55.5	4.09	34.7	6.49	1.38	0.511	-1.72	0.0887	2.95
Q90485	Hemoglobin subunit beta-2 OS=Danio rerio OX=7955 GN=ba2 PE=1 SV=3	ba2	1	5.28629e+06	16508651	10364800	12911999	6.38105e+06	0	13105693	31980248	45349384	30767004	56202760	5.40859e+06	25170256	2.26954e+07	16599334	5.74644e+06	1.68151e+07	9.39109e+06	2.06804e+07	7.34013e+06	1.54581e+07	0.55616	-0.359997	0.216441	1.23553e+07	1.95389e+07	2.56371e+07	4.59202e+07	3.94783e+07	8.03561e+06	0.570151	0.305459	-0.50385	2.27635e+07	2.28182e+07	1.81391e+07	53	46.4	34.7	65.1	12.6	1.36	0.509	1.62	0.67	1.8
Q7ZVM2	Monocarboxylate transporter 4b OS=Danio rerio OX=7955 GN=slc16a3 PE=2 SV=1	slc16a3	2	0	0	0	0	3.48884e+08	0	464686136	420778792	701212096	111252257	193008716	0	157045996	171248448	164670484	1.04271e+06	639543	1.00696e+06	1.37266e+06	1.09976e+06	745902	0.1194	0.235429	-0.13033	4.33519e+08	2.43383e+08	3.70679e+08	1.68399e+08	1.34114e+08	8.35915e+07	-0.410669	-0.258814	-0.646836	1.41023e+08	1.7225e+08	1.81518e+08	24.9	29.3	27.7	33.1	12.9	1.2	0.509	-2.71	0.0209	390
F1R826	Glutathione S-transferase theta 1b OS=Danio rerio OX=7955 GN=gstt1b PE=1 SV=1	gstt1b	1	0	0	0	0	0	0	4.68014e+06	2.4267e+06	6948225	1.75141e+06	0	0	2.52281e+06	1.7635e+06	764138	338452	805107	399173	1.03262e+06	202040	90304.2	0.484443	-0.600417	-0.645453	4.42854e+06	1.59575e+06	4.17376e+06	2.44567e+06	300902	123808	-0.257863	-0.724538	-1.52778	2.31274e+06	1.7716e+06	821415	49.3	117	46.1	135	46.2	-1.16	0.509	-3.55	0.15	6.61
Q5TZE8	N-acyl phosphatidylethanolamine phospholipase D OS=Danio rerio OX=7955 GN=napepld PE=1 SV=2	napepld	3	0	0	0	0	3.30503e+06	0	1.24107e+07	26462766	25249099	5.42561e+06	1.67928e+07	0	6.4371e+06	3.91527e+06	5.6083e+06	1.70666e+06	818046	1.48278e+06	1.63013e+06	4.57799e+06	915259	-0.0199254	0.747897	-0.209532	1.17456e+07	1.67416e+07	1.50439e+07	7.5889e+06	1.23239e+07	7.79304e+06	-0.189697	-0.133047	-0.285652	5.9016e+06	5.67389e+06	6.06339e+06	34.6	81.8	17.5	29	3.33	1.78	0.504	-1.57	0.0784	10.9
A8DZJ0	Tubulin folding cofactor B OS=Danio rerio OX=7955 GN=tbcb PE=1 SV=1	tbcb	3	8.80975e+06	6.95741e+06	2.26479e+06	6.59925e+06	2.10598e+06	5.20597e+06	0	0	5.92226e+06	0	0	2.28249e+06	4128079	1.38317e+06	1.23973e+06	9.55867e+06	7.84353e+06	7.65933e+06	1.13287e+07	3.57728e+06	6.29952e+06	0.0737806	-0.340959	-0.0848828	1.53791e+06	1.42285e+06	4.08934e+06	2.15228e+06	428670	3.60711e+06	0.145967	-0.521035	-0.0544942	4.49656e+06	2.10929e+06	2.29444e+06	12.5	55.6	64.1	77.1	44.8	-1.18	0.504	-1.14	0.68	-3.55
Q6NYK3	Sprouty-related, EVH1 domain-containing protein 2 OS=Danio rerio OX=7955 GN=spred2 PE=2 SV=1	spred2	2	0	0	0	0	34156796	0	1.64606e+07	34132018	27598436	1.35047e+07	32331688	0	14995976	21998892	11795241	1.64814e+06	1.43899e+06	840400	706214	996841	1.47291e+06	-0.368057	-0.159433	0.243691	1.55353e+07	2.12303e+07	1.62095e+07	1.946e+07	2.32394e+07	1.92414e+07	0.0978232	0.0392697	0.0744682	1.36566e+07	2.21132e+07	1.28199e+07	32	36.6	17.6	10.9	31.7	-1.24	0.502	1.17	0.245	13.5
E9QD79	Clathrin heavy chain OS=Danio rerio OX=7955 GN=cltcb PE=1 SV=2	cltcb	4	0	400536	1.40406e+07	0	4.05337e+06	6.67346e+06	0	2.42922e+06	1.91593e+06	2.34298e+06	6.7004e+06	0	843995	928828	3.19693e+06	2.79961e+06	1.50623e+06	1.28045e+07	6.08295e+06	6.10439e+06	6.87131e+06	0.337016	0.607751	-0.270323	1.70092e+06	2.13949e+06	2.61812e+06	3.97926e+06	5.13915e+06	5.07794e+06	0.369117	0.38058	0.287697	2.17435e+06	2.50726e+06	4.9655e+06	108	7.07	21.3	13.8	47.4	1.11	0.501	2.2	0.00877	-2.65
Q5BJC7	Si:xx-by187g17.5 OS=Danio rerio OX=7955 GN=hbaa2 PE=2 SV=1	hbaa2	3	0	707081	0	0	1.21315e+06	0	0	1.51345e+07	3.00296e+07	1.03625e+07	1.63267e+07	0	2961618	3.42674e+06	6.4229e+06	1.1066e+06	1.68682e+06	895767	919628	2.72803e+06	1.53061e+06	-0.08038	0.208779	0.232669	1.17506e+07	1.04734e+07	1.09254e+07	8.73751e+06	1.26531e+07	5.04877e+06	-0.128674	0.0821115	-0.335251	3.27291e+06	4.77558e+06	7.76657e+06	33.3	53.3	5.86	43.1	43.4	1.4	0.499	-1.25	0.387	8.99
Q502H0	Im:7145101 protein (Fragment) OS=Danio rerio OX=7955 GN=snap29 PE=2 SV=1	snap29	3	0	0	0	0	1.04597e+07	0	1.06381e+07	7.00477e+06	18819297	7.19792e+06	2.31202e+07	0	4.29541e+06	3643346	0	783913	1.0941e+06	946543	1.24325e+06	1.19678e+07	537601	0.200289	1.03896	-0.24568	1.0072e+07	8.32857e+06	1.13281e+07	1.0142e+07	1.68532e+07	3.21751e+07	0.00300498	0.306112	0.453363	4.71114e+06	4.60426e+06	5.18558e+06	16.5	140	15.2	57.3	6.4	4.87	0.498	1.99	0.217	10.5
Q7ZZ04	Enoyl CoA hydratase, short chain, 1, mitochondrial OS=Danio rerio OX=7955 GN=echs1 PE=1 SV=1	echs1	5	8.82396e+07	8.54992e+07	9.48891e+07	100400805	6.58659e+07	7.95205e+07	103277940	162111713	1.81163e+08	84484458	1.03376e+08	79032347	9.76742e+07	1.03771e+08	9.19998e+07	9.81646e+07	8.84312e+07	7.88619e+07	1.74988e+08	7.72206e+07	9.41648e+07	0.251054	-0.0588722	0.0770211	1.07435e+08	9.78949e+07	1.01933e+08	1.27412e+08	7.31446e+07	1.245e+08	0.0740672	-0.126578	0.0868552	9.70236e+07	1.04835e+08	1.01247e+08	10.9	45.3	4.68	28.2	3.87	1.3	0.493	1.06	0.898	1.16
E7F4H1	Dysferlin OS=Danio rerio OX=7955 GN=dysf PE=2 SV=2	dysf	1	0	0	0	0	1.67835e+06	0	0	0	0	0	0	0	0	0	0	159706	255860	403730	304389	1.9077e+06	178460	0.280107	0.872509	-0.35455	1.15311e+06	289739	265811	135400	1.0226e+06	303450	-0.930252	0.547699	0.0575137	337689	234303	340095	45	121	88.8	96.7	19.9	2.92	0.492	-1.17	0.759	2.09
A9JR88	Non-specific serine/threonine protein kinase OS=Danio rerio OX=7955 GN=mark1 PE=2 SV=1	mark1	1	0	0	0	0	580995	0	819432	1.40673e+06	1.46177e+06	0	1.02437e+06	0	831090	475704	566523	833915	672691	271831	94618	654159	490849	-0.945148	-0.012132	0.25665	780256	939528	923493	240028	778904	1.23844e+06	-0.511976	-0.0814257	0.127442	766893	477690	608015	48.8	69.6	9.95	66.4	23.5	-1.43	0.492	-1.17	0.541	1.49
Q6PHE8	Coiled-coil domain-containing protein 124 OS=Danio rerio OX=7955 GN=ccdc124 PE=2 SV=1	ccdc124	3	0	1.42287e+06	2.44654e+06	0	5.953e+06	2.23972e+06	1.29098e+07	22165209	1.85125e+07	4024981	2.38952e+07	2.77645e+06	7.14427e+06	4.50498e+06	6.81407e+06	2.13309e+06	2.64849e+06	3.55735e+06	2.63443e+06	6.9765e+06	2.57711e+06	0.0916778	0.42064	-0.139994	1.22149e+07	1.41107e+07	1.11377e+07	5.95146e+06	1.73904e+07	4.11139e+06	-0.312265	0.0907604	-0.432807	7.11502e+06	6.40652e+06	8.37186e+06	25.9	62.1	12.1	78.6	13.6	1.46	0.49	-1.36	0.365	4.49
A0A0R4IDZ5	Lysine (K)-specific demethylase 3B OS=Danio rerio OX=7955 GN=kdm3b PE=1 SV=1	kdm3b	3	7.40858e+06	9.0331e+06	9.22236e+06	4.00017e+06	234062	4.46816e+06	0	0	1.0794e+06	0	0	5.67609e+06	561254	2.02119e+06	2.52969e+06	8.02627e+06	9.184e+06	8.41247e+06	6.6699e+06	1.08257e+07	4.5993e+06	-0.0803945	0.0714222	-0.262232	719262	1.01717e+06	1.41092e+06	484319	1.98677e+06	8.22119e+06	-0.171755	0.290754	0.765432	3.65011e+06	2.50436e+06	3.26218e+06	6.9	43.1	33.1	115	18.6	-1.16	0.49	3.4	0.496	-8.14
Q498W6	NADH dehydrogenase [ubiquinone] 1 alpha subcomplex subunit 12 OS=Danio rerio OX=7955 GN=ndufa12 PE=2 SV=1	ndufa12	1	0	0	1.72439e+06	709510	2.25391e+06	722782	2.96497e+06	6337625	5628876	1.33749e+06	4.68638e+06	0	1.85914e+06	2.28998e+06	1.67964e+06	547067	759721	1.5796e+06	1.04538e+06	2.56868e+06	742844	0.281235	0.529056	-0.32765	2.81019e+06	4.05497e+06	3.40435e+06	1.85601e+06	3.45776e+06	4.56312e+06	-0.180155	-0.0691927	0.127228	1.70741e+06	2.30069e+06	1.81314e+06	56.7	67.4	18.2	41.3	16.3	1.51	0.489	-1.04	0.768	3.56
E9QFD8	Vitellogenin 4 OS=Danio rerio OX=7955 GN=vtg4 PE=1 SV=2	vtg7	18	3.88096e+07	4.2734e+07	3.3003e+07	1.81095e+07	5.11005e+08	2.44564e+07	1.80445e+08	5.92753e+08	7.11965e+08	1.11414e+08	4.60365e+08	2.19705e+07	259270300	2.24682e+08	2.19792e+08	4.74921e+07	4.79759e+07	3.22022e+07	3.30397e+07	3.96986e+08	4.20352e+07	-0.157585	0.917752	0.115727	2.0322e+08	3.57163e+08	3.91591e+08	1.64124e+08	3.27849e+08	8.64747e+07	-0.0927946	-0.0371928	-0.655944	2.46795e+08	2.78597e+08	2.44129e+08	21.1	132	31.6	63.9	7.48	3.7	0.486	-1.65	0.259	7.46
A1A5H8	Tyrosine-protein kinase yes OS=Danio rerio OX=7955 GN=yes1 PE=1 SV=1	yes1	1	0	0	0	0	6.86223e+06	0	0	9.53209e+06	0	0	0	0	0	0	0	682584	938292	825183	907635	531495	717141	0.123755	-0.246838	-0.0609458	189009	399849	1.06167e+06	498162	750963	141829	0.420888	0.273723	-0.874225	213146	194658	969383	15.7	26.2	82.8	66	96.3	-1.13	0.486	-1.19	0.855	-1.48
Q502Q3	Efnb3 OS=Danio rerio OX=7955 GN=efnb3b PE=1 SV=1	efnb3b	5	1313900	0	1.4367e+06	998434	3.23498e+07	878359	68902545	1.04461e+08	9.11554e+07	2.51549e+07	63354799	1.06744e+06	3.39486e+07	2.39401e+07	2.06173e+07	3.04904e+06	3.83587e+06	3.08612e+06	2.93099e+06	1.46939e+07	3.19212e+06	-0.0171495	0.583273	0.0146661	6.49616e+07	6.4252e+07	5.26929e+07	3.71164e+07	4.60167e+07	3.17072e+07	-0.24309	-0.144971	-0.220594	3.20644e+07	2.5475e+07	2.36212e+07	13.4	96.8	11.4	18.9	16.4	2.09	0.485	-1.58	0.0289	18.2
A4FUP1	Histidine ammonia-lyase OS=Danio rerio OX=7955 GN=hal PE=1 SV=1	hal	1	1.34324e+06	1.88342e+06	8.91648e+06	1.97806e+06	5.6439e+07	2.0357e+06	48715468	77168048	0	933617	75028344	2.01678e+06	1.52218e+06	37412178	1.97214e+06	1.44942e+06	1.91379e+06	8.08626e+06	3.00169e+06	6.61989e+07	2.0966e+06	0.316171	1.53896	-0.586232	4.57097e+07	4.59778e+07	3.36106e+07	1.28479e+06	5.24014e+07	2.92181e+06	-1.55118	0.0567947	-1.06082	1.3996e+06	3.76207e+07	2.13071e+06	97.1	155	16.9	154	151	6.23	0.484	-2.21	0.222	10.9
P35908	Keratin, type II cytoskeletal 2 epidermal OS=Homo sapiens GN=KRT2 PE=1 SV=2	KRT2	110	3.6393e+10	2.05997e+10	7.29008e+10	1.37672e+10	9.08629e+09	5.17466e+10	4.23727e+10	3.04157e+10	1.96564e+10	3.5187e+10	2.19258e+10	2.52267e+10	3.51243e+10	2.99575e+10	2.88305e+10	4.07197e+10	2.15205e+10	6.37309e+10	2.51571e+10	1.1534e+10	5.37806e+10	-0.209143	-0.270873	-0.0737241	3.92774e+10	1.69862e+10	1.04928e+10	5.65787e+10	1.49874e+10	4.27109e+10	0.158511	-0.0543711	0.609646	3.09667e+10	3.01585e+10	3.21994e+10	50.3	71.5	67.8	55.6	3.3	-1.39	0.483	1.71	0.382	-1.89
A2BIN5	Methylcrotonoyl-CoA carboxylase 2 (beta) OS=Danio rerio OX=7955 GN=mccc2 PE=1 SV=1	mccc2	20	8.30759e+07	1.28343e+08	1.357e+08	6.11453e+07	3.866e+08	7.24205e+07	6.21335e+07	368909105	5.2396e+08	2.02907e+08	6.07605e+08	4.49718e+07	2.55122e+08	1.89671e+08	2.03561e+08	1.00594e+08	1.3338e+08	1.27887e+08	1.38293e+08	3.21003e+08	9.69315e+07	0.13823	0.381417	-0.120361	1.29125e+08	2.20624e+08	2.90769e+08	2.91506e+08	3.96155e+08	1.8732e+08	0.353635	0.254212	-0.190964	2.32517e+08	1.88276e+08	2.23401e+08	14.6	64.3	38	35.8	10.9	1.54	0.482	1.37	0.378	1.77
F1QCN0	Zgc:112056 OS=Danio rerio OX=7955 GN=zgc:112056 PE=1 SV=1	gatd3a	2	0	0	0	0	1.67954e+06	0	2.14526e+06	3.45502e+06	2.36154e+06	420584	0	0	0	869435	0	1.16466e+06	849878	1.29271e+06	346039	2.34351e+06	268171	-0.527073	0.44051	-0.68309	2.91409e+06	3.11905e+06	2.191e+06	1.58958e+06	244507	1.23553e+06	-0.263221	-1.10573	-0.248789	1.00486e+06	1.09848e+06	1.14144e+06	20.7	119	17.8	68.1	6.46	-1.12	0.48	-2.68	0.165	2.49
Q9DGL6	Sodium/potassium-transporting ATPase subunit alpha OS=Danio rerio OX=7955 GN=atp1a1a.1 PE=1 SV=1	atp1a1a.1	54	3.10006e+08	2.82744e+08	1.02546e+08	1.33606e+08	3.73743e+09	9.59855e+07	3.72157e+09	5.71548e+09	5.34031e+09	1.86052e+09	5.45126e+09	8.84732e+07	2.29291e+09	2.16812e+09	1.88425e+09	3.27011e+08	3.08855e+08	3.69326e+08	2.84296e+08	2.0357e+09	3.31746e+08	-0.0607914	0.818959	-0.0466039	3.48646e+09	3.32374e+09	2.91054e+09	2.79437e+09	3.63567e+09	2.9043e+09	-0.0961005	0.0389568	-0.000932536	2.05696e+09	2.08545e+09	2.08706e+09	9.26	113	9.16	14.7	0.816	2.64	0.479	-1.04	0.677	9.67
A0A0R4ICK7	Catalase OS=Danio rerio OX=7955 GN=cat PE=1 SV=1	cat	3	5.35266e+06	9.47436e+06	1.50171e+07	2.28748e+06	1.78939e+06	1.82865e+07	6.97419e+06	6.90683e+06	3.34281e+06	1.3515e+07	1.48256e+07	6.79584e+06	8.98574e+06	6.77016e+06	1.16896e+07	6.84871e+06	1.09225e+07	1.4604e+07	4.40673e+06	2.93916e+06	1.88857e+07	-0.191493	-0.570097	0.11166	6.93929e+06	5.74209e+06	2.56379e+06	1.95271e+07	1.14908e+07	1.30091e+07	0.449323	0.301281	0.705364	1.12294e+07	7.07506e+06	1.3597e+07	35.9	101	44.5	29.1	31	-1.23	0.479	2.89	0.0473	-2.12
Q6PBT1	40S ribosomal protein S27 OS=Danio rerio OX=7955 GN=rps27.2 PE=1 SV=1	rps27.2	1	0	0	0	0	6.64475e+06	0	0	4.57809e+06	8.00577e+06	0	0	0	0	0	0	212994	819970	408175	765671	162864	101964	0.555675	-0.701972	-0.602401	6.37265e+06	2.95647e+06	4.78703e+06	248889	501670	218099	-1.40831	-0.770355	-1.34141	815981	733244	202324	64.5	107	36.3	48.2	57	-1.4	0.478	-14.6	0.00151	9.8
A1L257	Sideroflexin OS=Danio rerio OX=7955 GN=sfxn3 PE=2 SV=1	sfxn3	1	0	2.30742e+06	0	0	6.24316e+06	0	3.60384e+06	11006063	11216094	1.78144e+06	7.11906e+06	0	0	4.94255e+06	4.30609e+06	411372	2.34514e+06	733228	1.22979e+06	429214	272044	0.475597	-0.737495	-0.430599	3.41331e+06	6.932e+06	6.63388e+06	2.48858e+06	5.20937e+06	7.02183e+06	-0.137224	-0.124073	0.024683	4.20957e+06	4.96689e+06	4.67176e+06	89.1	79.8	34.5	46.5	8.27	-1.81	0.478	-1.15	0.663	4.87
F8W2V6	Isocitrate dehydrogenase [NAD] subunit, mitochondrial OS=Danio rerio OX=7955 GN=idh3b PE=1 SV=1	idh3b	1	0	8.22698e+06	0	0	2.9942e+06	0	1.76516e+06	0	5.6015e+06	950807	0	0	1.40696e+06	1.90487e+06	1.48641e+06	242741	278300	476909	855065	3.42102e+06	130669	0.546856	1.08964	-0.562264	1.67614e+06	3.74263e+06	3.38833e+06	1.309e+06	207500	526017	-0.10737	-1.25616	-0.808986	1.29426e+06	1.91366e+06	1.60351e+06	37.9	118	37.6	83.3	19.3	4.42	0.477	-4.31	0.0698	8.83
Q7ZW95	Ribosomal protein L4 OS=Danio rerio OX=7955 GN=rpl4 PE=1 SV=1	rpl4	8	59271389	36534619	6.66062e+06	1.64252e+07	5.75893e+07	11846801	15262130	4.5324e+07	88941645	2.00976e+07	5.10974e+07	5.89308e+06	4.17498e+07	1.83579e+07	1.86735e+07	6.74943e+07	3.97008e+07	1.93264e+07	3.05198e+07	3.79219e+07	1.52668e+07	-0.344685	-0.0199086	-0.102402	4.9194e+07	2.95831e+07	3.95956e+07	3.1477e+07	3.03958e+07	2.86631e+07	-0.193919	0.0117685	-0.140324	3.92355e+07	3.31286e+07	2.39618e+07	57.3	41.4	24.9	4.7	23.9	-1.51	0.477	-1.31	0.232	-1.07
Q5PQZ7	Blood vessel epicardial substance OS=Danio rerio OX=7955 GN=bves PE=1 SV=1; Duplicate proteins: G9HVJ5|G9HVJ5_DANRE	bves	20	1.15545e+08	1.79173e+08	1.65017e+08	5.19652e+07	1.41746e+09	1.60257e+08	1.92081e+09	3.25597e+09	2.72693e+09	9.28978e+08	2.46474e+09	8.99836e+07	1.16826e+09	1.0517e+09	1.11723e+09	1.33323e+08	1.89843e+08	1.54976e+08	1.32714e+08	1.40956e+09	1.54586e+08	-0.0019856	0.870687	-0.00109229	1.79094e+09	1.83522e+09	1.444e+09	1.3934e+09	1.65077e+09	7.79917e+08	-0.109007	-0.0459994	-0.267519	1.05037e+09	1.06567e+09	1.23118e+09	17.9	129	12.7	35.1	8.99	3.55	0.476	-1.33	0.287	10.6
X1WE68	AT hook-containing transcription factor 1 OS=Danio rerio OX=7955 GN=ahctf1 PE=1 SV=1	ahctf1	1	9.70527e+06	6444543	5.58078e+06	792249	16209738	1.54643e+06	5.54727e+07	9.60178e+07	43079712	14893041	84845920	0	27439162	28905986	2.4424e+07	1.05847e+07	6.55736e+06	5.07565e+06	1.171e+06	1.88021e+07	1.59181e+06	-0.956122	0.457477	-0.503602	5.20257e+07	5.68533e+07	2.43945e+07	2.18566e+07	5.91141e+07	4.6187e+07	-0.376634	0.0169354	0.277229	2.48028e+07	2.90647e+07	2.67446e+07	38.5	140	39.4	44.6	7.94	-1.03	0.476	-1.05	0.883	6
E7EYW2	Epsin 2 OS=Danio rerio OX=7955 GN=epn2 PE=4 SV=1	epn2	1	0	0	0	0	706400	0	990836	1.66982e+06	1625111	605138	1.0762e+06	0	528976	430180	430027	589578	233223	598707	115487	796747	178560	-0.708009	0.533549	-0.525429	942821	1.1098e+06	1.02318e+06	824411	817517	447026	-0.0582859	-0.13275	-0.359618	489419	431962	460844	44	104	8.15	31	6.24	-1.3	0.476	-1.47	0.167	2.16
A0A0G2L2K5	Uncharacterized protein OS=Danio rerio OX=7955 GN=scarb2b PE=1 SV=1	scarb2b	15	1.0458e+07	6.03094e+06	8691927	5.31795e+06	1.38096e+08	1.08291e+07	8.89415e+08	1.34342e+09	1.10478e+09	7.07322e+07	5.57466e+08	9.69435e+06	3.04094e+08	3.32301e+08	336801184	1.65277e+07	1.52708e+07	1.3047e+07	1.31028e+07	1.99169e+07	1.78848e+07	-0.100851	0.115362	0.136974	8.33198e+08	7.88011e+08	6.07101e+08	1.2419e+08	3.69944e+08	1.70428e+08	-0.82666	-0.328397	-0.551721	3.52602e+08	3.43774e+08	3.70297e+08	11.8	20.6	16.1	59	3.8	1.14	0.475	-3.35	0.0464	49.7
F1QFK4	Roundabout, axon guidance receptor, homolog 3 (Drosophila) OS=Danio rerio OX=7955 GN=robo3 PE=1 SV=1	robo3	3	0	0	0	0	5.86011e+06	0	826064	3.05392e+06	4.25576e+06	630312	2.61985e+06	0	0	1.45184e+06	789879	1.23724e+06	1.54544e+06	1.0741e+06	1.00179e+06	6.67157e+06	1.43187e+06	-0.0916759	0.635176	0.12486	1.4449e+06	2.53418e+06	3.0383e+06	1.55083e+06	3.13764e+06	1.85804e+06	0.0307264	0.0927654	-0.213575	1.88066e+06	2.25226e+06	1.70042e+06	18.6	104	34.8	38.6	14.5	2.36	0.472	-1.07	0.833	1.82
F1Q836	Phosphate transporter OS=Danio rerio OX=7955 GN=slc20a2 PE=3 SV=2	slc20a2	5	0	0	0	0	30639706	588403	1.81389e+07	3.608e+07	5.21951e+07	6821177	3.96479e+07	0	9.37887e+06	3.82105e+06	9.5505e+06	2.16913e+06	1.44633e+06	2.91808e+06	1.90971e+06	8.13464e+06	2.11985e+06	-0.0553189	0.750071	-0.138792	1.76399e+07	2.27904e+07	1.92846e+07	1.01862e+07	2.89114e+07	2.01481e+07	-0.238482	0.103317	0.0190241	9.7624e+06	1.5839e+07	1.16838e+07	33.8	87.2	13.2	47.4	25	1.86	0.469	-1.01	0.801	9.14
F1QHW9	Poly [ADP-ribose] polymerase (Fragment) OS=Danio rerio OX=7955 GN=parp4 PE=1 SV=2	parp4	2	9.13491e+06	1.16695e+07	9.43914e+06	1.01695e+07	0	9.59772e+06	3.83036e+06	7.37979e+06	4.48044e+06	2.82363e+06	4.17087e+06	1.05773e+07	6.09712e+06	4.77656e+06	4.4871e+06	9.9379e+06	1.18767e+07	8.57817e+06	1.60265e+07	1.00279e+07	9.90454e+06	0.207544	-0.0734856	0.06244	3.7519e+06	4.80584e+06	2.8469e+06	4.99096e+06	3.36078e+06	1.58263e+07	0.123933	-0.15533	0.745007	5.5809e+06	5.64865e+06	5.1369e+06	16.4	29.2	25.8	84.1	5.1	1.18	0.469	2.12	0.361	-2.66
Q9DDU5	Glutathione S-transferase pi OS=Danio rerio OX=7955 GN=gstp1 PE=1 SV=1	gstp1	1	6.35021e+06	0	0	0	3552772	0	0	6.53769e+06	7.07274e+06	1.88204e+06	3.80167e+06	0	2.40213e+06	0	2.03089e+06	187676	190438	256178	399617	4.06543e+06	101162	0.328236	1.32935	-0.403526	1.95521e+06	4.17927e+06	4.24612e+06	2.63247e+06	2.81663e+06	1.84601e+06	0.12917	-0.171371	-0.361759	2.20275e+06	1.47348e+06	2.19454e+06	18.3	145	37.7	21.2	21.4	7.2	0.466	-1.42	0.36	16.4
E9QFJ1	ATP-dependent 6-phosphofructokinase OS=Danio rerio OX=7955 GN=pfkpb PE=1 SV=1	pfkpb	8	1.38654e+07	1.18784e+07	3.00411e+07	1.36473e+06	4.59649e+07	10009474	2.87602e+07	97321668	123544845	6.38628e+06	4.4871e+07	4.04673e+06	3.61575e+07	3.883e+07	3.06232e+07	1.68755e+07	1.44957e+07	1.82179e+07	2.36298e+07	4.19065e+07	1.1941e+07	0.146203	0.461043	-0.183459	3.93429e+07	6.09503e+07	6.55849e+07	1.84081e+07	2.24721e+07	2.11219e+07	-0.329856	-0.433333	-0.492072	3.46277e+07	2.97217e+07	4.14874e+07	11.4	58.5	25.3	10	16.8	1.56	0.466	-2.68	0.0169	3.35
P02666	Beta-casein OS=Bos taurus GN=CSN2 PE=1 SV=2	CSN2	1	4.47617e+06	354994	0	0	1.20051e+06	1.45674e+06	0	0	0	629290	812174	0	0	517782	838649	4.86144e+06	360051	945432	8.47987e+06	1.36048e+06	1.49931e+06	0.241624	0.577328	0.200261	469350	903993	844758	858095	620402	1.37488e+06	0.262039	-0.163492	0.211532	588719	519958	901959	119	108	31.9	40.6	30.4	1.84	0.465	1.29	0.487	-2.78
E7F1E3	ATP-binding cassette, sub-family B (MDR/TAP), member 4 OS=Danio rerio OX=7955 GN=abcb4 PE=4 SV=1	abcb4	9	3.29836e+06	2.73889e+07	7297930	2.33748e+06	4.89494e+07	5336823	3.21525e+07	3.64829e+07	3.34979e+07	2.78186e+07	5.07962e+07	3.19534e+06	1.17264e+07	1.00953e+07	16906559	7.13793e+06	9.64909e+06	1.00098e+07	8.99209e+06	3.0478e+07	8.00147e+06	0.100288	0.4995	-0.0972538	3.06178e+07	2.396e+07	2.12581e+07	3.96916e+07	3.74012e+07	5.35834e+07	0.112723	0.193398	0.401505	1.29138e+07	1.42917e+07	1.9091e+07	17.5	80.3	19.1	20.1	21	1.77	0.465	1.72	0.0247	2.83
F1QXK1	Si:ch211-207d6.2 OS=Danio rerio OX=7955 GN=si:ch211-207d6.2 PE=4 SV=2	si:ch211-207d6.2	10	0	0	0	0	2.0811e+07	1.11906e+06	2.315e+07	2.95266e+07	1.54671e+07	2.1714e+06	2.58701e+07	0	3.95064e+06	7.74393e+06	5493726	3.77125e+06	5.14193e+06	4.92332e+06	4.13844e+06	1.93107e+07	4.58345e+06	0.040351	0.574672	-0.031065	2.21098e+07	1.94708e+07	2.21372e+07	4.99603e+06	2.0281e+07	6.74133e+06	-0.645959	0.017705	-0.516377	7.8832e+06	1.30406e+07	1.02334e+07	16	92.4	7.21	78.4	24.9	2.03	0.464	-1.99	0.174	4.61
Q6TH14	Enolase 1, (Alpha) OS=Danio rerio OX=7955 GN=eno3 PE=1 SV=1	eno3	11	4.43769e+07	6.449e+07	1.08267e+08	6.41127e+07	3.52348e+07	1.24492e+08	50021151	1.05519e+08	5.4288e+07	2.96719e+07	1.95042e+08	5.0878e+07	7.23092e+07	7.4116e+07	6.16153e+07	5.33683e+07	6.87605e+07	9.39197e+07	1.15989e+08	5.19881e+07	1.31015e+08	0.337135	-0.121435	0.144566	4.91935e+07	6.62082e+07	3.78974e+07	5.22562e+07	1.28238e+08	7.99271e+07	0.0262305	0.287104	0.324085	6.42976e+07	6.63997e+07	6.83771e+07	28.4	42.1	27.9	44.3	3.07	1.38	0.464	1.7	0.198	-1.41
E7F0K3	Caveolae-associated protein 1a OS=Danio rerio OX=7955 GN=cavin1a PE=4 SV=1	cavin1a	8	3.40478e+08	2.62114e+08	8.54585e+08	101849719	1.30561e+08	6.78417e+08	2.9609e+08	4.03214e+08	338374442	3.47732e+08	356966225	3.2557e+08	4.0902e+08	3.29384e+08	3.32671e+08	3.82266e+08	2.68448e+08	7.46446e+08	1.77964e+08	1.37585e+08	7.15513e+08	-0.332034	-0.29029	-0.0183805	2.82551e+08	2.35748e+08	1.87223e+08	5.38443e+08	2.49007e+08	6.73503e+08	0.280043	0.0237639	0.555981	3.69066e+08	3.31973e+08	3.68505e+08	53.6	93.9	20.3	44.5	5.96	-1.36	0.464	2.07	0.148	-1.98
A0A0R4ISE5	Si:rp71-36a1.3 OS=Danio rerio OX=7955 GN=si:rp71-36a1.3 PE=1 SV=1	si:rp71-36a1.3	3	0	0	4.26188e+06	4.9205e+06	1064170	2.08987e+06	6.52799e+06	1.70128e+07	7.59274e+06	2.1743e+06	5.91769e+06	3.7525e+06	1560740	3.17372e+06	4.99242e+06	1.91777e+06	1.70609e+06	4.99605e+06	8.61228e+06	2.04292e+06	3.47875e+06	0.652322	0.0782493	-0.157204	6.35345e+06	6.68384e+06	4.83789e+06	4.33864e+06	4.58476e+06	5.77942e+06	-0.165657	-0.163709	0.077228	2.13755e+06	4.0005e+06	5.63697e+06	64.1	73.3	16.5	15.7	44.6	1.64	0.463	-1.22	0.222	2.07
B8A5E8	Insulin-degrading enzyme OS=Danio rerio OX=7955 GN=ide PE=3 SV=2	ide	2	1.67586e+06	962929	1.37416e+07	0	0	4.10821e+06	2.01896e+06	0	0	0	0	0	0	0	0	2.00494e+06	1.22835e+06	4.10588e+06	536803	636697	4.36883e+06	-0.572286	-0.285391	0.0269589	2.86297e+06	1.13481e+06	455676	581224	267900	1.6976e+06	-0.692474	-0.626951	0.571179	1.077e+06	851845	798554	60.9	118	83.6	88.5	16.3	-1.32	0.462	-1.75	0.489	-1.65
Q6P5M5	Novel protein similar to vertebrate ADP-ribosylation factor 4 (ARF4) (Zgc:77650) OS=Danio rerio OX=7955 GN=DKEY-238C7.11 PE=1 SV=1	DKEY-238C7.11	2	0	0	2.29324e+06	725352	688087	0	0	5.41854e+06	4.29684e+06	2.29845e+06	6920156	683850	1.84863e+06	3.11495e+06	2.48609e+06	1.1044e+06	940243	2.88071e+06	1.20599e+06	943759	1.01382e+06	0.0382158	0.00162086	-0.453538	3.72636e+06	3.54764e+06	2.68064e+06	3.17979e+06	5.13437e+06	2.82374e+06	-0.0688864	0.160547	0.0225858	2.98352e+06	3.12918e+06	2.67977e+06	65.5	12.9	16.9	33.5	7.82	-1.56	0.461	1.12	0.703	2.02
Q567N5	Ribosomal protein L6 OS=Danio rerio OX=7955 GN=rpl6 PE=1 SV=1	rpl6	5	0	0	0	0	2.73705e+07	0	0	7002712	29880369	0	28109786	0	3.09665e+06	3.39694e+06	2618526	2.4406e+06	2.84264e+06	2.61364e+06	3.30258e+06	1.42646e+07	1.9457e+06	0.131357	0.700539	-0.128169	6.29993e+06	5.80236e+06	1.25353e+07	2.43841e+06	5.71495e+06	2.27631e+06	-0.412229	-0.00659233	-0.740903	4.42375e+06	6.19951e+06	4.9624e+06	7.66	104	45.7	55.8	17.5	2.47	0.46	-2.36	0.0836	3.12
F1QU24	ADAM metallopeptidase domain 9 OS=Danio rerio OX=7955 GN=adam9 PE=4 SV=1	adam9	1	0	0	0	0	29728894	0	6.7853e+06	1.42236e+07	1.35212e+07	9.91521e+06	1.99844e+07	0	5.66853e+06	8.62893e+06	6.21196e+06	222899	323933	173285	470133	172333	377712	0.324112	-0.274087	0.338399	6.41196e+06	8.89325e+06	7.94905e+06	1.44144e+07	1.43278e+07	6.69918e+06	0.351807	0.20712	-0.0742935	5.17178e+06	8.67296e+06	6.75266e+06	32	44.8	16.2	37.5	25.5	1.42	0.458	1.52	0.279	32.3
F1R105	Smoothelin,-like OS=Danio rerio OX=7955 GN=smtnl PE=4 SV=1	smtnl	3	3.35237e+07	3.91445e+07	3.76967e+07	2.90784e+07	5642271	3.08627e+07	0	5.57932e+06	8.99699e+06	858084	2.0113e+06	22792367	1.95491e+07	1.76423e+07	1.56239e+07	3.66052e+07	3.9865e+07	3.41113e+07	4.62357e+07	6.42266e+06	3.18927e+07	0.101435	-0.792877	-0.0292067	2.45438e+06	3.68964e+06	5.54753e+06	6.93061e+06	1.97968e+07	3.41725e+07	0.45083	0.729611	0.789576	1.78192e+07	1.77304e+07	1.69698e+07	7.83	71.5	40	67.1	2.67	-1.31	0.458	5.21	0.0645	-9.46
A5X6X6	Titin b OS=Danio rerio OX=7955 GN=ttn.1 PE=4 SV=1	ttn.1	5	1.61883e+07	1.50041e+07	1.27321e+07	1.197e+07	1.68951e+06	1.0971e+07	942644	3.05382e+06	11725710	0	0	1.07744e+07	3.66942e+06	5.59559e+06	7.23772e+06	1.7751e+07	1.55911e+07	1.38666e+07	2.08411e+07	3.55212e+06	1.22643e+07	0.0696987	-0.64239	-0.0533257	4.22116e+06	3.08672e+06	7.64355e+06	2.41114e+06	2.42522e+06	5.1303e+06	-0.243209	-0.104746	-0.173153	4.37955e+06	7.23655e+06	9.09266e+06	12.4	70.7	47.6	47.1	34.4	-1.29	0.457	-1.5	0.335	-3.16
Q6DGL0	Ribosomal protein L18 OS=Danio rerio OX=7955 GN=rpl18 PE=1 SV=1	rpl18	2	990414	1096155	4517144	564493	2.07336e+07	4.31888e+06	767688	1.6724e+07	3.06208e+07	1.58832e+06	16668692	1220742	8.03251e+06	1.06746e+07	1.01391e+07	1.31841e+06	1.27053e+06	4.99879e+06	1.15562e+06	8.44269e+06	5.66174e+06	-0.0572344	0.822494	0.0540855	8.59678e+06	1.06143e+07	1.78911e+07	2.52435e+06	6.20953e+06	2.72007e+06	-0.532186	-0.232834	-0.818058	7.34349e+06	1.07276e+07	1.10108e+07	84.6	72.3	39.5	54.3	21	2.01	0.456	-3.24	0.0315	4.89
K7W5A6	Shroom3v1 OS=Danio rerio OX=7955 GN=shroom3 PE=2 SV=1	shroom3	2	2.09128e+06	2.73667e+06	5.92818e+06	0	3.47871e+06	4.36574e+06	0	6.79425e+06	4.80709e+06	5232007	1.62676e+06	0	3.97598e+06	1.98925e+06	1.9965e+06	2.5451e+06	3.18639e+06	5.40855e+06	4.5714e+06	3.95543e+06	4.49719e+06	0.254345	0.0938949	-0.0801393	3.79876e+06	4.40485e+06	2.98002e+06	476049	1.48289e+06	827157	-0.90199	-0.472824	-0.556632	3.64925e+06	1.99803e+06	3.58756e+06	40.5	7.75	19.2	55	30.4	1.17	0.456	-4.01	0.0343	1
Q6DG11	SART1, U4/U6.U5 tri-snRNP-associated protein 1 OS=Danio rerio OX=7955 GN=sart1 PE=1 SV=1	sart1	1	7.0006e+06	8897038	8.04866e+06	6.861e+06	1.17719e+06	6060206	0	0	0	4468689	0	7346988	0	0	0	7.62151e+06	9.05602e+06	7.30381e+06	1.07908e+07	1.33383e+06	6.25535e+06	0.151012	-0.831838	-0.0672978	272537	591409	90613.2	6.37731e+06	1.01443e+07	1.10012e+07	1.36921	1.23433	2.08425	465337	1.05127e+06	320936	11.7	77.2	79.7	26.8	63.1	-1.3	0.456	28.8	0.0154	-25.1
F1QQU8	Protein BCCIP homolog OS=Danio rerio OX=7955 GN=bccip PE=1 SV=1	bccip	1	2825129	4.16396e+06	3.90367e+06	2.77322e+06	523367	3.22264e+06	719181	735837	1.53062e+06	451809	670861	3.48583e+06	2.40283e+06	2.08743e+06	2.265e+06	3.06069e+06	4.2348e+06	3.5581e+06	4.24944e+06	588725	3.32216e+06	0.142512	-0.856921	-0.0297985	685120	500618	965552	611359	514399	5.12118e+06	-0.0494703	0.0117941	0.724594	2.20339e+06	2.09713e+06	2.44893e+06	16.3	70	32.6	126	8.02	-1.33	0.456	2.9	0.554	-5.05
A0A286YA36	Disco-interacting protein 2 homolog Ca OS=Danio rerio OX=7955 GN=dip2ca PE=1 SV=1	dip2ca	2	0	0	0	0	6.26084e+06	0	2.92051e+06	6312929	4883853	2.0149e+06	4591186	0	2581793	1.60675e+06	1.44596e+06	895839	769295	755931	541154	7.15694e+06	1.13907e+06	-0.218909	0.968635	0.178067	3.19298e+06	4.22413e+06	3.13228e+06	3.6e+06	3.71264e+06	9.40372e+06	0.0521066	-0.0560547	0.477439	2.76315e+06	2.61794e+06	1.80526e+06	9.57	124	17.4	59.6	21.6	3.65	0.452	1.58	0.369	4.36
E7F372	RAS p21 protein activator (GTPase-activating protein) 1b OS=Danio rerio OX=7955 GN=rasa1b PE=4 SV=1	rasa1b	15	6.50875e+07	7.10575e+07	7.34657e+07	4.34252e+07	8.08477e+07	5.95302e+07	1.01502e+08	1.42499e+08	1.14619e+08	5.42693e+07	99877328	7.29906e+07	8.5255e+07	7.79404e+07	8.16305e+07	8.11115e+07	7.08748e+07	6.06771e+07	8.75511e+07	8.44273e+07	6.47856e+07	0.0331796	0.0759909	0.0284538	9.19086e+07	9.07029e+07	6.92073e+07	8.13823e+07	7.45058e+07	1.20787e+08	-0.0528262	-0.0854312	0.24187	7.91891e+07	8.09558e+07	8.71942e+07	14.4	15.6	15.2	27.1	5.1	1.11	0.452	1.1	0.677	1.18
E7F1E4	G protein-coupled receptor 156 OS=Danio rerio OX=7955 GN=gpr156 PE=4 SV=1	gpr156	2	0	0	2305117	0	1.81616e+07	758776	9.86693e+06	1.70654e+07	1.82631e+07	3.74602e+06	1.22261e+07	995521	7.50656e+06	6838979	4.22989e+06	1.42591e+06	1.96292e+06	2.31509e+06	1.63323e+06	1.20598e+07	1.95976e+06	0.0589569	0.788439	-0.0723651	9.33431e+06	1.08201e+07	1.086e+07	5.243e+06	8.9708e+06	3.1106e+06	-0.250503	-0.0813986	-0.542987	6.86248e+06	6.87186e+06	4.57236e+06	23.6	114	8.41	51.4	21.7	2.74	0.451	-1.79	0.156	5.44
Q7ZVD3	LIM-domain binding factor 3a OS=Danio rerio OX=7955 GN=ldb3a PE=2 SV=1	ldb3a	3	9.07313e+07	9.69847e+07	7.77891e+07	60758078	26701944	7.33205e+07	0	21117398	21547798	7.83166e+06	18681524	5.57117e+07	5.54967e+07	4.04311e+07	4.62156e+07	9.97893e+07	9.89036e+07	6.99269e+07	9.97877e+07	4.96847e+07	7.59766e+07	-7.20357e-06	-0.29899	0.0360354	1.36652e+07	1.34411e+07	1.33074e+07	1.29953e+07	1.41388e+07	7.93651e+07	-0.0218267	0.0219757	0.775536	5.01077e+07	4.06499e+07	5.05861e+07	19	33.3	1.34	107	11.9	-1.19	0.449	2.64	0.419	-6.65
A7E2Q3	Vtnb protein (Fragment) OS=Danio rerio OX=7955 GN=vtnb PE=2 SV=1	vtnb	4	1.39481e+06	1052916	982969	1.03864e+06	7.1935e+06	1.44517e+06	1.90638e+06	0	1.20822e+07	5.89232e+06	4.75623e+06	0	3.02865e+06	1894631	909266	2.7531e+06	2.99634e+06	2.15836e+06	2.7405e+06	8.38426e+06	2.39015e+06	-0.0019909	0.446873	0.0443005	2.84244e+06	3.45029e+06	8.18322e+06	8.86151e+06	4.67377e+06	3.3786e+06	0.493816	0.131811	-0.384188	4.13946e+06	3.79671e+06	2.99752e+06	16.4	74.7	60.6	50.8	16.1	1.71	0.447	1.17	0.69	1.83
A0A0R4IRH8	Non-specific serine/threonine protein kinase OS=Danio rerio OX=7955 GN=pak2a PE=1 SV=1	pak2a	1	0	0	0	0	1.61012e+06	0	4.3719e+06	6.16443e+06	2518397	3281690	7.04129e+06	0	2462395	1.98596e+06	1.68152e+06	839124	655314	898026	213714	1.82947e+06	126319	-0.593994	0.445875	-0.85182	4.13788e+06	3.94727e+06	1.56328e+06	4.64987e+06	5.15359e+06	8.79591e+06	0.0506624	0.115813	0.750244	2.25768e+06	1.99516e+06	1.81518e+06	15.9	133	44.6	36.5	11	-1.1	0.447	1.93	0.146	4.03
Q7ZUL7	RNA binding protein OS=Danio rerio OX=7955 GN=rbpms2b PE=1 SV=1	rbpms2b	3	3.4066e+07	3.29906e+07	2.42425e+07	2.02541e+07	7.43627e+06	2.36793e+07	9.54667e+06	1.76303e+07	2.00934e+07	6.81568e+06	1.82543e+07	19996826	1.42644e+07	1.37936e+07	1.21121e+07	3.01419e+07	3.42908e+07	2.27844e+07	3.29123e+07	9.15152e+06	2.53956e+07	0.0381876	-0.573684	0.0471209	1.00124e+07	1.17437e+07	1.20603e+07	1.01821e+07	1.35343e+07	3.08233e+07	0.00729954	0.0616326	0.40752	1.32458e+07	1.40908e+07	1.39867e+07	20	54	9.78	60.9	3.34	-1.29	0.443	1.61	0.386	-2.58
A2CET4	PTPRF-interacting protein,-binding protein 2b (liprin beta 2) (Fragment) OS=Danio rerio OX=7955 GN=ppfibp2b PE=4 SV=1	ppfibp2b	1	1.82355e+06	1414759	2.08538e+06	0	2.09629e+07	961987	1.40687e+07	24802864	2.06939e+07	6.23586e+06	1.86924e+07	1.99464e+06	9.94635e+06	1.03176e+07	7.45036e+06	1.97094e+06	1.43711e+06	1.90806e+06	3.25797e+06	2.43713e+07	989262	0.218274	1.22939	-0.285281	1.32597e+07	1.5264e+07	1.19995e+07	8.9684e+06	1.34193e+07	2.88893e+06	-0.16982	-0.0559371	-0.618426	9.04468e+06	1.03709e+07	8.10672e+06	16.5	135	12.2	62.7	12.4	5.38	0.441	-1.6	0.293	7.62
F1QEJ5	Ubiquinol-cytochrome c reductase, complex III subunit VII OS=Danio rerio OX=7955 GN=uqcrq PE=1 SV=1	uqcrq	4	3.46243e+06	6.99165e+06	23364500	0	9.42108e+07	5.13577e+06	5.42771e+07	1.4439e+08	1.30066e+08	4.01845e+07	119126883	8.21923e+06	65035559	2.87323e+07	6.91469e+07	5.63753e+06	8.71439e+06	8.11781e+06	1.00775e+07	2.25412e+07	5.64033e+06	0.252263	0.41274	-0.158134	5.51168e+07	8.67428e+07	7.29757e+07	5.97356e+07	8.39083e+07	5.64887e+07	0.0349494	-0.0144287	-0.111217	5.92099e+07	3.4554e+07	7.60941e+07	21.8	68.7	22.1	22.5	36.9	1.7	0.44	-1.07	0.72	9.56
A0A140LG52	Si:dkey-31j3.11 OS=Danio rerio OX=7955 GN=si:dkey-31j3.11 PE=4 SV=1	si:dkey-31j3.11	1	0	0	0	0	0	0	0	4196561	2501766	0	0	0	0	0	0	610220	299836	907449	1.12442e+06	747187	542872	0.265444	0.396545	-0.223125	1.9947e+06	2.71681e+06	1.55329e+06	361887	475768	229292	-0.741305	-0.756664	-0.830864	664190	408139	213929	50.2	36.7	28.1	34.7	52.7	1.33	0.44	-5.87	0.00332	3.45
P42212	Green fluorescent protein OS=Aequorea victoria GN=GFP PE=1 SV=1	GFP	65	8.44107e+10	9.73539e+10	8.83853e+10	5.85717e+10	2.81859e+11	6.97249e+10	2.53469e+11	4.165e+11	4.12377e+11	1.47237e+11	3.68993e+11	6.30359e+10	2.11952e+11	1.88126e+11	1.73634e+11	9.53663e+10	9.98484e+10	7.72073e+10	1.11407e+11	3.474e+11	7.30032e+10	0.0675192	0.541489	-0.0243168	2.32699e+11	2.08552e+11	1.88051e+11	2.52295e+11	2.2877e+11	1.1267e+11	0.0351134	0.0401842	-0.222468	1.84557e+11	1.89582e+11	1.96769e+11	13.2	83.8	10.7	37.8	3.23	1.95	0.438	-1.06	0.704	2.31
Q66I77	Cytochrome c oxidase subunit 6A, mitochondrial OS=Danio rerio OX=7955 GN=cox6a2 PE=1 SV=1	cox6a2	1	3.95244e+06	10179725	5.46459e+06	5.22664e+06	1.70315e+07	4.78393e+06	47975853	6.43376e+07	7.01266e+07	12164287	39980860	0	2.09283e+07	35915623	26735688	4.28976e+06	1.03632e+07	4.97061e+06	8.15621e+06	1.9764e+07	4.93561e+06	0.279056	0.280383	-0.00306954	4.50182e+07	3.85325e+07	3.90891e+07	1.77683e+07	2.82736e+07	8.71508e+07	-0.403743	-0.134446	0.348216	1.89477e+07	3.61153e+07	2.929e+07	50.9	71.2	8.79	84.2	30.7	1.67	0.438	1.09	0.787	6.25
Q6P2M0	Zgc:77235 OS=Danio rerio OX=7955 GN=rpl27a PE=2 SV=1	rpl27a	3	4.8585e+06	0	17886322	1.15711e+06	4.64881e+07	1.98531e+07	4.06819e+06	51112573	47498128	11489347	21400470	535704	0	0	22551419	6.51601e+06	1.64132e+07	1.66093e+07	8.27581e+06	5.41836e+07	2.08832e+07	0.103828	0.518675	0.0994472	5.38246e+07	3.19488e+07	2.76117e+07	1.82668e+07	4.83621e+06	1.48767e+06	-0.469318	-0.81995	-1.26859	2.24598e+06	2.18928e+06	1.26687e+06	43.8	85.4	37.2	108	28.9	2.11	0.437	-4.61	0.104	2.87
F1QX79	Acetyl-CoA carboxylase beta (Fragment) OS=Danio rerio OX=7955 GN=acacb PE=1 SV=1	acacb	1	12213587	1.35574e+07	12969964	3.05845e+06	1.41688e+07	9.47922e+06	9290278	8796138	18648320	0	18134374	7.69188e+06	9.08205e+06	9.17752e+06	5.0371e+06	1.33368e+07	1.38061e+07	1.17354e+07	4.69973e+06	1.6415e+07	9.79334e+06	-0.45298	0.0751696	-0.0785681	8.76918e+06	5.57563e+06	1.08498e+07	3.21347e+06	1.30265e+07	1.15312e+07	-0.435984	0.368534	0.0264503	8.26315e+06	9.22453e+06	5.46942e+06	8.38	57	31.6	57.1	25.5	-1.26	0.437	1.1	0.953	-1.54
G1K2R4	Calmodulin-regulated spectrin-associated protein 1-B OS=Danio rerio OX=7955 GN=camsap1b PE=3 SV=2	camsap1b	5	6.72605e+06	7.55625e+06	9.23004e+06	4471445	638840	7713131	1.93236e+06	1.6841e+06	4.7108e+06	2.12073e+06	2.61889e+06	8.83298e+06	2.83372e+06	2.31031e+06	2567699	7.67836e+06	7.92442e+06	9.07616e+06	8.26252e+06	2.93721e+06	8.33706e+06	0.0318441	-0.431032	-0.0368895	4.08011e+06	3.2044e+06	3.70414e+06	5.341e+06	1.24543e+07	1.36308e+07	0.116951	0.589574	0.565834	3.74052e+06	3.12251e+06	3.79841e+06	9.07	47.5	12	42.8	10.5	-1.26	0.436	2.86	0.075	-2.25
F1Q750	Host cell factor C1a OS=Danio rerio OX=7955 GN=hcfc1a PE=1 SV=1	hcfc1a	2	5.82213e+06	5.71551e+06	7.42637e+06	4.16444e+06	0	5.95535e+06	0	0	0	0	0	8.50808e+06	2.30459e+06	1.16581e+06	1.9077e+06	6.30972e+06	5.81105e+06	1.00798e+07	7.7213e+06	3.15233e+06	6.45058e+06	0.0876802	-0.265623	-0.193852	1.33307e+06	923305	657705	1.23248e+06	1.44146e+06	394362	-0.0340719	0.193457	-0.222136	2.72225e+06	1.9747e+06	2.34834e+06	31.5	40.8	35	54.2	15.9	-1.28	0.436	1.05	0.923	-7.62
A0A0R4ICE3	Tyrosine-protein kinase receptor OS=Danio rerio OX=7955 GN=insrb PE=1 SV=1	insrb	3	0	0	0	0	2.86717e+06	0	3.22146e+06	1.44201e+07	1.43896e+07	2.62745e+06	6.41123e+06	726140	2.11036e+06	1.67698e+06	5.1223e+06	1.16592e+06	1.52924e+06	1.26678e+06	1.42758e+06	3.36486e+06	1.19541e+06	0.0879312	0.342491	-0.0251847	1.53025e+07	9.28786e+06	8.71721e+06	3.61344e+06	5.19985e+06	3.66562e+06	-0.626841	-0.251925	-0.37623	3.9368e+06	2.66296e+06	5.53662e+06	14.2	59.7	32.9	21.7	35.6	1.51	0.435	-2.67	0.0147	8.41
F1QZ45	AP-2 complex subunit alpha OS=Danio rerio OX=7955 GN=ap2a1 PE=1 SV=3	ap2a1	3	2.02835e+06	6.46018e+06	3.26102e+06	3.14285e+06	6.90318e+06	3.74623e+06	4.35348e+06	1862415	6.2294e+06	4091207	6.76541e+06	2.03003e+06	6.53354e+06	5.73084e+06	4.72663e+06	2.9135e+06	7.11327e+06	4.6659e+06	6.01964e+06	7.8706e+06	4.56468e+06	0.315156	0.0439382	-0.00952532	5.88856e+06	1.61722e+06	3.99709e+06	5.70137e+06	6.06484e+06	3.50903e+06	-0.0140292	0.574051	-0.0565566	5.99174e+06	6.7877e+06	5.63735e+06	43.1	26.9	55.8	27.2	9.6	1.26	0.434	1.33	0.43	-1.28
A0A0R4IXC8	Tubulin beta chain OS=Danio rerio OX=7955 GN=tubb6 PE=1 SV=1	tubb6	8	2.18351e+07	2.85465e+07	1.63182e+07	6.13624e+06	50233961	1.93332e+06	1.67414e+07	2.59545e+07	5.28666e+07	1.08606e+07	3.27136e+07	7.60419e+06	12565575	1.09888e+07	2.74529e+07	3.27151e+07	3.29853e+07	1.25231e+07	1.08357e+07	3.95786e+07	4.95934e+06	-0.479893	0.0791391	-0.402289	1.83802e+07	1.80851e+07	3.17124e+07	1.80672e+07	2.06774e+07	2.93372e+07	-0.00746056	0.058176	-0.0338103	1.61344e+07	1.40892e+07	2.18637e+07	45	100	34.3	26	23.2	-1.41	0.434	-1	0.959	-1.15
F1QDL1	Collagen, type I, alpha 1b OS=Danio rerio OX=7955 GN=col1a1b PE=1 SV=1	col1a1b	1	0	0	0	0	1.46108e+06	0	0	0	0	0	0	0	0	0	0	340714	201389	223017	389527	1.65869e+06	168598	0.0581473	0.915727	-0.121486	158030	274055	294636	108391	358490	221658	-0.163748	0.116639	-0.123601	837762	975018	600551	29.4	109	30.4	54.6	23.5	2.9	0.432	-1.06	0.763	-1.05
Q8JH70	Fructose-bisphosphate aldolase C-B OS=Danio rerio OX=7955 GN=aldocb PE=2 SV=1; Duplicate proteins: B2GP30|B2GP30_DANRE	aldocb	5	1.27432e+07	5.35205e+06	1.32088e+08	1.21862e+07	58487029	1.20782e+08	1.29475e+08	1.34042e+08	5.14968e+07	4.32551e+07	176040849	5.87805e+06	16538884	1.65531e+07	5.18036e+06	1.52313e+07	6.6151e+06	1.18472e+08	2.29135e+07	5.97204e+07	1.26045e+08	0.177354	0.955586	0.02691	1.23801e+08	8.03247e+07	1.70783e+07	6.51261e+07	1.22542e+08	1.08095e+07	-0.278969	0.183435	-0.198637	1.82966e+07	1.75897e+07	1.0182e+07	133	75.1	72.8	84.5	29.3	1.49	0.431	-1.11	0.823	1.58
F1QWE3	C-mer proto-oncogene tyrosine kinase a OS=Danio rerio OX=7955 GN=mertka PE=1 SV=1	mertka	2	0	0	0	0	3.08616e+06	0	6004299	2.04566e+06	1934127	2.40859e+06	2.22703e+06	0	1737306	0	1.61577e+06	679599	648124	1.42387e+06	1.63517e+06	3.50538e+06	556120	0.38131	0.733077	-0.408302	5.68736e+06	1.99926e+06	1.34302e+06	3.33626e+06	1.88629e+06	2.57334e+06	-0.23165	-0.0252613	0.282415	1.93378e+06	2.12709e+06	1.94551e+06	47.9	78.6	77.8	27.9	5.41	2.07	0.43	-1.16	0.969	3.28
B0R197	Voltage-dependent anion channel 3 OS=Danio rerio OX=7955 GN=vdac3 PE=1 SV=1	vdac3	1	0	0	0	0	0	0	0	4027416	5005049	0	0	0	1.63614e+06	0	0	871452	1.02828e+06	673634	918625	189457	780345	0.0228945	-0.734602	0.0638627	2.31402e+06	2.61037e+06	3.03858e+06	163864	543858	464157	-1.14988	-0.681216	-0.816007	1.50374e+06	456637	366207	20.7	61.5	13.7	51.3	81.5	-1.36	0.428	-6.8	0.0283	3.09
B3DH54	Zgc:152810 protein OS=Danio rerio OX=7955 GN=ncl PE=2 SV=1	ncl	4	3.43722e+07	49969092	5.63492e+07	2.12687e+07	24075106	4.67023e+07	3.49481e+07	5.35629e+07	5.78481e+07	1.54343e+07	4.35983e+07	31257042	3.48087e+07	2.81982e+07	3.71404e+07	3.84777e+07	5.091e+07	5.08426e+07	3.34126e+07	4.164e+07	4.88037e+07	-0.0612982	-0.0872921	-0.0177751	3.29228e+07	3.27078e+07	3.35509e+07	2.62428e+07	3.11281e+07	4.76994e+07	-0.0984865	-0.0214996	0.152809	3.15955e+07	2.83442e+07	4.05489e+07	15.3	18.7	1.33	32.1	18.9	-1.13	0.427	1.06	0.9	-1.41
P02768	Serum albumin OS=Homo sapiens GN=ALB PE=1 SV=2	ALB	18	7.24257e+07	4.36855e+07	1.86402e+08	6.10388e+07	1.39819e+08	1.27563e+08	8.48816e+07	2.11394e+08	1.54794e+08	2.13319e+08	4.06409e+09	7.20227e+07	4.68919e+08	3.65784e+08	3.34548e+08	7.9669e+07	5.0558e+07	1.46464e+08	1.22194e+08	9.09191e+07	1.35194e+08	0.18576	0.254865	-0.0347725	8.32399e+07	1.13101e+08	9.98144e+07	3.1972e+08	2.47467e+09	7.77761e+08	0.584439	1.34005	0.891653	3.79331e+08	3.70641e+08	3.70161e+08	53.3	19.6	15.2	95.3	1.38	1.26	0.425	12.1	0.0646	1.07
Q6DGE9	Protein unc-45 homolog B OS=Danio rerio OX=7955 GN=unc45b PE=1 SV=2	unc45b	20	2.97718e+08	3.23695e+08	1.99392e+08	2.00272e+08	1.33589e+08	2.77303e+08	1.53661e+08	2.06091e+08	1.84006e+08	4.14443e+07	1.47448e+08	1.23287e+08	1.70871e+08	1.42858e+08	1.20601e+08	3.39568e+08	3.25691e+08	3.09578e+08	3.67639e+08	2.03665e+08	2.749e+08	0.0344944	-0.203889	-0.0515941	1.51499e+08	1.25371e+08	1.08956e+08	6.89816e+07	1.1837e+08	1.59328e+08	-0.341675	-0.0249544	0.165041	1.56564e+08	1.50338e+08	1.35277e+08	4.62	29.1	16.7	39.1	7.43	-1.15	0.425	-1.11	0.604	-2.53
Q7SYM1	Forkhead box K1 OS=Danio rerio OX=7955 GN=foxk1 PE=1 SV=1	foxk1	16	5.55273e+08	6.91576e+08	5.30721e+08	4.00655e+08	91915065	5.02524e+08	2.23695e+07	1.07e+07	2.33232e+07	1.47787e+07	36338571	3.87789e+08	2.17554e+08	2.17054e+08	2.14455e+08	6.10731e+08	7.05618e+08	4.77127e+08	6.49162e+08	2.55267e+08	5.2525e+08	0.0265035	-0.441575	0.0417324	2.74857e+07	1.5469e+07	2.1925e+07	9.43953e+07	4.51997e+07	4.26242e+08	0.535843	0.465673	1.28872	2.23179e+08	2.52667e+08	2.40089e+08	19.2	42.3	27.8	110	6.2	-1.25	0.425	8.72	0.109	-27.6
X1WFS0	Obscurin, cytoskeletal calmodulin and titin-interacting RhoGEF b (Fragment) OS=Danio rerio OX=7955 GN=obscnb PE=4 SV=2	obscnb	1	861386	1.79039e+06	1.00527e+06	0	1.06983e+06	1.01925e+06	503054	758747	1718061	0	0	0	1.62137e+06	0	0	927252	1.81915e+06	923900	374772	1.21114e+06	1.04827e+06	-0.393431	-0.176674	0.0548487	479845	515753	1.07975e+06	211104	375270	121043	-0.356604	-0.138097	-0.950387	1.49025e+06	794141	835854	42.2	50.5	48.6	54.7	37.5	-1.39	0.422	-2.93	0.0594	-1.77
A0A0R4IHJ6	AP-2 complex subunit mu-B OS=Danio rerio OX=7955 GN=ap2m1b PE=3 SV=1	ap2m1b	1	0	0	2.32645e+06	0	3.5063e+06	0	3.14519e+06	5.558e+06	6.03514e+06	2.01134e+06	7173813	0	1.27025e+06	1.64739e+06	1736617	328071	259123	2.12722e+06	1.24686e+06	4.01178e+06	436297	0.579851	1.18983	-0.68803	2.98037e+06	3.56948e+06	3.64184e+06	2.81768e+06	5.24864e+06	1.93734e+06	-0.0243788	0.167442	-0.274115	1.1692e+06	1.65492e+06	1.87498e+06	117	98.8	10.7	51.4	23.1	2.1	0.42	-1.02	0.765	3.75
Q6KB66	Keratin, type II cytoskeletal 80 OS=Homo sapiens GN=KRT80 PE=1 SV=2	KRT80	11	6.00553e+07	7.02793e+07	1.57769e+08	2.75977e+07	1.19283e+07	1.1611e+08	6.93223e+07	6.35665e+07	48070208	4.73891e+07	7.9896e+07	50505227	7.83289e+07	7.34924e+07	5.63663e+07	7.06161e+07	7.74076e+07	1.13579e+08	5.69226e+07	2.42553e+07	1.1453e+08	-0.0936191	-0.503977	0.00362091	6.55748e+07	4.07991e+07	3.65331e+07	6.80535e+07	5.85267e+07	7.69051e+07	0.0161133	0.156703	0.323268	8.574e+07	7.44698e+07	6.17237e+07	26.5	70.1	32.9	13.6	16.2	-1.34	0.42	1.42	0.156	-1.83
E7EYJ7	Erbb2 interacting protein OS=Danio rerio OX=7955 GN=erbin PE=1 SV=2	erbin	3	590165	611869	553058	0	5.21116e+06	559023	5.50152e+06	9.53118e+06	9.76534e+06	2.73763e+06	8.78193e+06	683874	4.43839e+06	3.82116e+06	3.69938e+06	1.64112e+06	1.80801e+06	1.68504e+06	1.69903e+06	5.9397e+06	1.74395e+06	0.0150612	0.516564	0.0149243	5.22059e+06	6.20642e+06	5.99174e+06	3.77193e+06	6.53385e+06	4.46144e+06	-0.141155	0.0223277	-0.128077	4.0812e+06	3.83843e+06	3.98869e+06	5.05	77.9	8.93	29.2	3.09	1.83	0.417	-1.18	0.366	3.39
Q1LU92	Catenin (cadherin-associated protein), alpha-like 1 OS=Danio rerio OX=7955 GN=ctnnal1 PE=1 SV=2	ctnnal1	5	1.41421e+06	2.66597e+06	1.42467e+06	818695	1.14158e+07	2.14307e+06	23802650	66431172	4.76731e+07	8.63992e+06	2.70035e+07	5.41864e+06	2.04286e+07	2.25341e+07	21473052	3.37367e+06	3.54704e+06	2.88538e+06	4.02514e+06	1.41416e+07	2.754e+06	0.0766776	0.600632	-0.0202386	3.277e+07	4.15195e+07	3.20565e+07	1.27005e+07	2.08119e+07	1.41891e+07	-0.411656	-0.29994	-0.353963	1.9672e+07	2.26457e+07	2.35451e+07	10.5	89.5	14.9	27.2	9.23	2.13	0.415	-2.23	0.0159	10.8
A2CJ05	Dystrobrevin OS=Danio rerio OX=7955 GN=dtnba PE=2 SV=1	dtnba	16	9.06281e+06	1.93815e+07	1.97056e+08	3.92819e+07	1.72335e+08	2.31721e+08	3.4253e+08	4.12024e+08	2.85282e+08	1.88175e+08	303441684	8.86853e+07	2.10277e+08	2.06958e+08	1.647e+08	2.83831e+07	5.90601e+07	1.82465e+08	7.43832e+07	9.86526e+07	2.5796e+08	0.418415	0.222815	0.150374	3.24525e+08	2.55181e+08	1.64033e+08	2.84307e+08	2.16217e+08	1.76758e+08	-0.0574599	-0.0719593	0.0324489	1.92705e+08	2.03032e+08	1.85459e+08	90.7	69.4	32.5	24.1	4.56	1.6	0.415	-1.1	0.776	2.76
Q6PHK7	26S proteasome non-ATPase regulatory subunit 2 OS=Danio rerio OX=7955 GN=psmd2 PE=2 SV=1	psmd2	1	0	0	0	0	1263563	0	0	0	0	0	0	0	0	0	0	296859	208454	581785	1.09917e+06	1.43259e+06	179394	0.568513	0.837113	-0.510953	128728	157312	628130	697214	107472	1.23539e+06	0.733694	-0.165466	0.293755	457637	198968	320188	53.8	71.8	92	83	39.7	2.49	0.414	2.23	0.504	-1.19
F1R605	Calcium channel, voltage-dependent, beta 1 subunit OS=Danio rerio OX=7955 GN=cacnb1 PE=4 SV=1	cacnb1	2	3.58758e+06	3.67369e+06	2.45127e+06	0	1.99248e+07	2.40292e+06	18982782	27290234	4.06505e+07	9771239	2.64377e+07	7.69709e+06	16713037	1.7019e+07	10758018	4.82518e+06	4.07724e+06	2.63998e+06	5.49578e+06	2.30554e+07	2.8208e+06	0.0565153	0.752407	0.0287721	1.80624e+07	1.72173e+07	2.32514e+07	1.5227e+07	1.89813e+07	1.16569e+07	-0.0741608	0.0423604	-0.299866	1.5601e+07	1.71076e+07	1.23038e+07	28.9	105	16.7	24	16.4	2.72	0.411	-1.28	0.217	5.07
I3ISA6	Epiplakin 1 OS=Danio rerio OX=7955 GN=eppk1 PE=1 SV=1	eppk1	6	52518416	7.92343e+07	3.93331e+07	2.55341e+07	6.42956e+07	48417790	1.26016e+08	69924872	177683066	2.97863e+07	2.11303e+07	1.81823e+07	3.15185e+07	1.1369e+08	3.80459e+07	5.92257e+07	8.28202e+07	3.66802e+07	7.80203e+07	7.6674e+07	6.28413e+07	0.119698	-0.0334881	0.233814	1.26255e+08	4.3762e+07	9.90624e+07	4.68813e+07	1.60701e+07	4.48826e+07	-0.43025	-0.435079	-0.343831	3.0376e+07	1.1489e+08	4.27681e+07	38.7	11.6	46.9	48	72.8	1.22	0.41	-2.5	0.123	1.51
O66837	Biotin [acetyl-CoA-carboxylase] ligase OS=Aquifex aeolicus (strain VF5) GN=birA PE=1 SV=1	birA	53	7.7246e+10	9.13073e+10	8.96248e+10	5.85435e+10	2.16218e+11	6.72272e+10	2.35849e+11	3.91669e+11	3.45286e+11	1.23645e+11	3.38564e+11	6.4093e+10	1.91159e+11	1.72157e+11	1.71422e+11	8.73518e+10	9.36661e+10	7.76338e+10	1.131e+11	2.66136e+11	7.05818e+10	0.11219	0.453521	-0.0413585	2.165e+11	1.95689e+11	1.57643e+11	2.12356e+11	2.0956e+11	1.14353e+11	-0.00839409	0.0297436	-0.139427	1.66237e+11	1.73461e+11	1.94448e+11	9.37	68.6	15.7	31.2	8.23	1.74	0.409	-1.06	0.715	2.2
E7FE29	Myosin XVIIIAb OS=Danio rerio OX=7955 GN=myo18ab PE=1 SV=2	myo18ab	34	2.66813e+08	4.04423e+08	8.86772e+08	6.04826e+08	316273632	6.49069e+08	4.00917e+07	4.13229e+08	4.71228e+08	2.11167e+07	2.2633e+07	7.24174e+07	2.66207e+08	1.80724e+08	1.72342e+08	3.28524e+08	4.0684e+08	8.01233e+08	1.08273e+09	4.253e+08	6.68465e+08	0.517954	0.0192709	-0.0786803	1.79547e+08	2.53502e+08	2.63495e+08	4.45148e+07	6.52224e+07	9.95897e+07	-0.605673	-0.589584	-0.422558	2.51531e+08	1.94206e+08	1.96662e+08	49.5	45.8	19.8	39.9	15.1	1.42	0.408	-3.33	0.0176	-2.21
F1QLY0	Coiled-coil domain-containing 141 (Fragment) OS=Danio rerio OX=7955 GN=ccdc141 PE=4 SV=2	ccdc141	1	0	0	3.10094e+06	0	1.27164e+06	0	0	4869173	8219266	0	0	0	0	2.43167e+06	0	189954	162604	2.8304e+06	903145	1.44183e+06	1.21763e+06	0.67711	0.947784	-0.366332	3.84118e+06	3.13892e+06	4.91051e+06	646257	268384	515389	-0.774059	-1.06802	-0.978992	220894	2.4431e+06	773051	144	22.8	22.5	40.3	101	1.12	0.407	-8.31	0.0057	3.74
Q7ZVP2	RAB5C, member RAS oncogene family OS=Danio rerio OX=7955 GN=rab5c PE=1 SV=1	rab5c	1	0	0	0	0	0	0	0	0	3244741	0	2.62725e+06	0	1.07866e+06	0	0	399728	330760	231703	102632	276292	333677	-0.590484	-0.0781447	0.158395	278546	136539	1.99771e+06	163944	1.9608e+06	107721	-0.230201	1.15718	-1.26823	993810	203943	525169	26.3	50.6	129	142	69.2	-1.35	0.405	-1.08	0.839	2.51
A8E5M6	TAF9 RNA polymerase II, TATA box binding protein (TBP)-associated factor OS=Danio rerio OX=7955 GN=taf9 PE=2 SV=1	taf9	1	15153964	16581703	15691192	9359929	0	17044396	0	1.0194e+06	0	0	0	11835376	7.81706e+06	6.1888e+06	4.72559e+06	1.65669e+07	1.68896e+07	1.41811e+07	1.48531e+07	4.80501e+07	1.76302e+07	-0.0474224	0.454075	0.0945463	1.05037e+06	687122	363078	115756	169256	239492	-0.9578	-0.60849	-0.180708	7.11852e+06	6.21972e+06	5.12942e+06	9.32	68.6	49.1	35.5	16.2	1.69	0.404	-4	0.0284	-22.7
E9QI46	Coronin OS=Danio rerio OX=7955 GN=coro1cb PE=1 SV=1	coro1cb	9	48768244	8.74413e+07	9.07382e+07	5.74968e+07	3.07569e+07	1.04626e+08	22086527	3.08617e+07	4.30937e+07	1.24375e+07	5.0422e+07	7.68535e+07	7.39533e+07	5.07603e+07	4.89947e+07	9.80436e+07	8.99418e+07	8.29951e+07	8.80158e+07	1.28659e+08	9.41216e+07	-0.0468586	0.15548	0.054637	3.19575e+07	2.36844e+07	2.16702e+07	3.38726e+07	3.89942e+07	1.03234e+08	0.025276	0.216537	0.67796	6.79271e+07	5.47675e+07	7.15494e+07	8.34	21.2	21.2	65.8	13.6	1.15	0.403	2.28	0.173	-3.51
Q90486	Hemoglobin subunit beta-1 OS=Danio rerio OX=7955 GN=ba1 PE=1 SV=3; Duplicate proteins: B3DG37|B3DG37_DANRE	ba1	12	8.69926e+08	8.91541e+08	6.61029e+08	1.02281e+09	3767323470	4.79555e+08	9.90532e+08	3.58299e+09	4.46539e+09	2.26215e+09	4.62002e+09	7.96317e+08	1962572255	2.10437e+09	1954785857	9.64222e+08	9.11843e+08	5.93404e+08	1.76223e+09	4.38539e+09	4.98995e+08	0.261886	0.682088	-0.0752549	9.44455e+08	2.02554e+09	2.3202e+09	3.56861e+09	3.0905e+09	1.30028e+09	0.577318	0.183489	-0.25149	1.74157e+09	2.11852e+09	2.16886e+09	24.4	89.5	41.1	45.1	11.6	2.69	0.402	1.5	0.407	2.14
F1QHJ8	Ryanodine receptor 1a (skeletal) OS=Danio rerio OX=7955 GN=ryr1a PE=1 SV=2	ryr1a	3	4.26206e+06	4345897	3.05106e+06	6.86081e+06	1.18665e+08	2088041	115797664	1.38204e+08	1.92937e+08	3.23884e+07	137144112	0	7.44118e+07	64497388	1.15999e+08	5.93606e+06	5.35498e+06	4.08062e+06	1.12262e+07	1.21533e+08	2.97047e+06	0.276734	1.35593	-0.137901	1.09459e+08	8.2501e+07	1.0446e+08	4.82258e+07	9.49842e+07	9.83396e+07	-0.35597	0.0611921	-0.0262199	6.78843e+07	6.60764e+07	4.8755e+07	18.5	146	14.5	34.8	17.3	8.83	0.401	-1.23	0.405	19.3
A0A0R4INP3	Myomesin 2a OS=Danio rerio OX=7955 GN=myom2a PE=1 SV=1	myom2a	25	1.48637e+08	2.11659e+08	2.71827e+08	138003470	1.38718e+08	272850126	1.27924e+08	2.34666e+08	1.98921e+08	7.09841e+07	1.76249e+08	1.79865e+08	215245369	1.82937e+08	2.02607e+08	1.64723e+08	2.20697e+08	2.39076e+08	2.34223e+08	2.06611e+08	2.63844e+08	0.152876	-0.0286427	0.0428104	1.42237e+08	1.39342e+08	1.20412e+08	1.37548e+08	1.41368e+08	2.74504e+08	-0.014558	0.00626859	0.357878	2.07352e+08	1.8665e+08	2.288e+08	18.6	12.2	8.85	42.3	10.2	1.13	0.401	1.38	0.357	-1.55
E7FAI0	Uncharacterized protein OS=Danio rerio OX=7955 GN=LOC100334619 PE=4 SV=2	LOC100334619	1	0	0	0	0	4556395	0	6.98752e+06	0	6.39412e+06	0	0	0	0	0	0	896249	421877	307639	128716	640286	283897	-0.842796	0.181188	-0.0348811	6.60235e+06	5.29579e+06	3.85125e+06	782823	437013	191391	-0.926035	-1.08344	-1.30368	398563	593272	333258	57.6	74.7	26.2	63.2	30.6	-1.54	0.401	-11.2	0.0153	9.69
A4VAK4	Heat shock protein 1 OS=Danio rerio OX=7955 GN=hspb1 PE=1 SV=1	hspb1	13	9.44026e+08	887954335	1.20255e+10	3.57445e+09	1.68499e+09	10713880208	7.58922e+09	7.18868e+09	5.0615e+09	5.72399e+09	6.54823e+09	6.9119e+09	7.77264e+09	6.49009e+09	5.86862e+09	1.04386e+09	9.01109e+08	1.0481e+10	6.56998e+09	2.01918e+09	1.11945e+10	0.798921	0.350397	0.0286019	7.01329e+09	3.81698e+09	2.5158e+09	9.60506e+09	4.21881e+09	1.21895e+10	0.136578	0.0434705	0.68531	6.81481e+09	6.53714e+09	6.60136e+09	133	69.6	52	46.9	2.19	1.59	0.4	1.95	0.204	1.07
B5DDU6	Rpl28l protein OS=Danio rerio OX=7955 GN=rpl28 PE=2 SV=1	rpl28	1	0	0	0	0	4124584	0	0	0	4.38879e+06	851977	7.07585e+06	0	2391591	0	0	237179	210408	167302	895936	4.72605e+06	83713.3	0.577201	1.35143	-0.300706	267142	584483	2.6758e+06	1.16995e+06	5.17838e+06	1.24637e+06	0.641426	0.947422	-0.331806	2.19314e+06	226380	963524	17.2	130	111	90.6	88.1	9.28	0.398	2.15	0.317	5.74
E9QCG6	Collagen, type I, alpha 2 OS=Danio rerio OX=7955 GN=col1a2 PE=1 SV=1	col1a2	3	2133708	5.00422e+06	2.67755e+06	1.16625e+06	20802866	0	25584792	4.60509e+07	1.22538e+08	8.20327e+06	58434992	0	32436244	2.75877e+07	3.13551e+07	3.56732e+06	6.06572e+06	3.33411e+06	1.95895e+06	2.50892e+07	2.02777e+07	-0.260317	0.616604	0.784038	3.0854e+07	2.85927e+07	6.86144e+07	1.28585e+07	4.20631e+07	3.03477e+07	-0.380121	0.167645	-0.354289	3.39056e+07	2.79541e+07	3.48043e+07	35	77.4	52.7	51.7	11.6	3.65	0.397	-1.5	0.392	9.88
A0A1D5NSX1	Vacuolar protein sorting 13 homolog C (S. cerevisiae) OS=Danio rerio OX=7955 GN=vps13c PE=1 SV=1	vps13c	3	1.04461e+06	7.93208e+06	3.53297e+06	3.52703e+06	0	5.50003e+06	4441919	9.99031e+06	3.55872e+06	0	3.39031e+06	5.27989e+06	4.52315e+06	3.00803e+06	2980054	1.85778e+06	8.06329e+06	3.89547e+06	5.28915e+06	6.80436e+06	6.32649e+06	0.454393	-0.0737248	0.210603	4.91225e+06	6.46526e+06	3.32696e+06	5.56144e+06	2.5721e+06	7.62332e+06	0.0539068	-0.400299	0.360096	4.58398e+06	3.37118e+06	4.46468e+06	68.7	12.6	32	48.4	16.1	1.33	0.397	1.07	0.979	1.06
F1QSE1	Ventricular myosin heavy chain-like OS=Danio rerio OX=7955 GN=myh7l PE=1 SV=1	myh7l	177	6.74336e+09	1.09658e+10	6.40642e+09	2.70695e+09	8.33598e+09	1.52353e+10	1.43599e+09	1.14634e+10	1.44038e+10	1.31131e+09	7.98781e+09	3.84615e+09	7.87447e+09	7.63996e+09	7.10478e+09	7.74393e+09	1.11907e+10	5.86409e+09	7.57923e+09	9.59209e+09	1.57885e+10	-0.00933655	-0.0669439	0.43014	3.47282e+09	6.74842e+09	7.79735e+09	2.69738e+09	5.52471e+09	6.41311e+09	-0.109741	-0.0868922	-0.0848784	7.11524e+09	7.67576e+09	7.63693e+09	32.7	38.9	37.6	39.8	4.19	1.33	0.397	-1.23	0.586	-1.38
I3ITQ9	Si:ch211-18i17.2 OS=Danio rerio OX=7955 GN=si:ch211-18i17.2 PE=4 SV=1	si:ch211-18i17.2	8	4.78564e+06	2368103	0	0	3.62501e+07	0	3.25989e+07	5.89216e+07	8.4141e+07	1.00159e+07	3.77935e+07	2.221e+06	1.78298e+07	1.38831e+07	1.075e+07	8.77574e+06	5.60339e+06	6.39324e+06	3.38085e+06	9.44565e+06	3.0429e+06	-0.414257	0.226781	-0.322434	3.35712e+07	3.75282e+07	4.96197e+07	1.54556e+07	2.86325e+07	1.73216e+07	-0.336882	-0.117498	-0.457065	1.74843e+07	1.73142e+07	1.73892e+07	23.9	68.1	20.8	34.8	0.49	-1.31	0.397	-1.97	0.0447	5.81
F1QT17	Caveolin OS=Danio rerio OX=7955 GN=zgc:172270 PE=3 SV=2	zgc:172270	1	0	0	0	0	11362262	0	0	6.18029e+06	0	9.18134e+06	6.36486e+06	0	0	0	0	283021	768768	404224	112260	438830	389825	-0.401595	-0.243499	-0.0157528	799021	3.95714e+06	733000	1.33238e+07	4.66783e+06	6.75014e+06	1.22207	0.0717334	0.964209	402592	704524	750654	52.1	56.2	101	54.8	30.5	-1.55	0.396	4.51	0.0667	3.77
A0A0R4IZU6	Si:dkey-34d22.1 OS=Danio rerio OX=7955 GN=si:dkey-34d22.1 PE=4 SV=1	si:dkey-34d22.1	1	0	0	0	0	1.71951e+06	0	0	0	0	0	1984876	0	0	0	0	314655	668668	289630	284273	1.95491e+06	700243	-0.0440986	0.465917	0.383405	155031	497086	334437	350246	1.48962e+06	256017	0.353954	0.476644	-0.116045	464951	363165	872677	50	88.8	52	98.3	47.6	2.31	0.394	2.12	0.449	-1.29
A0A0R4II76	Acetyl-CoA acetyltransferase, mitochondrial OS=Danio rerio OX=7955 GN=acat1 PE=1 SV=1	acat1	3	6.039e+06	6.36858e+06	6562876	1.78374e+06	1.43279e+07	5.20045e+06	1.45854e+07	3.64053e+07	36994687	1.40689e+07	1.84151e+07	3.98954e+06	8.78859e+06	13790491	8439749	7.44102e+06	6.87242e+06	6.43357e+06	1.07827e+07	1.64532e+07	5.35436e+06	0.161095	0.379142	-0.0797441	1.37978e+07	2.28654e+07	2.17656e+07	2.01824e+07	1.35104e+07	7.31132e+06	0.165162	-0.22851	-0.473775	1.1375e+07	1.38582e+07	1.59371e+07	7.3	51.1	25.4	47.1	16.6	1.57	0.393	-1.42	0.305	2.82
A0A0R4ISC7	Proteasome subunit alpha type OS=Danio rerio OX=7955 GN=psma6b PE=1 SV=1	psma6b	1	1.92617e+06	1.53053e+06	7.20581e+06	0	0	3823504	4.7666e+06	3.91393e+06	0	1.05072e+06	5.19493e+06	1.7708e+06	2.90685e+06	2.53417e+06	2.53937e+06	2.08247e+06	1.55484e+06	6.54338e+06	546509	1.20841e+06	3.94294e+06	-0.58098	-0.109471	-0.219982	4.51006e+06	2.53888e+06	1.29033e+07	1.44992e+06	3.82518e+06	2.55695e+06	-0.492838	0.178009	-0.702978	2.66258e+06	2.54611e+06	2.74725e+06	80.8	94.8	82.8	45.5	3.81	-1.79	0.392	-2.55	0.246	1.96
F1QI57	Disks large homolog 1 OS=Danio rerio OX=7955 GN=dlg1 PE=1 SV=2	dlg1	5	1457538	4.26148e+06	6545683	8486592	1.4389e+07	2.03858e+06	9.07896e+06	1.13215e+07	1.61145e+07	7.38452e+06	1.78648e+07	0	5755722	5.49548e+06	4.13574e+06	3.86216e+06	5.80545e+06	8.85298e+06	1.55866e+07	1.12519e+07	4.3213e+06	0.605922	0.287392	-0.311475	9.71689e+06	1.00503e+07	1.04113e+07	1.02963e+07	1.38875e+07	9.24583e+06	0.0251554	0.140446	-0.051558	6.17185e+06	5.99076e+06	5.93667e+06	40.7	54.7	3.45	21.8	2.04	1.68	0.39	1.11	0.548	1.63
E7F3A1	Oxysterol-binding protein OS=Danio rerio OX=7955 PE=3 SV=2	osbpl8	4	14627174	3.28944e+07	30485684	9727522	1.45067e+07	2.00127e+07	43843538	69876797	1.19567e+08	3.22719e+07	9.67488e+07	8.3286e+06	6.62646e+07	8.74305e+06	4.48958e+06	1.79748e+07	3.39969e+07	2.91259e+07	2.73521e+07	1.08369e+07	2.21383e+07	0.182325	-0.496535	-0.119134	4.12833e+07	4.30512e+07	7.35447e+07	4.80797e+07	6.30118e+07	3.54071e+07	0.0661879	0.165436	-0.317461	7.30543e+06	9.46603e+06	6.54014e+06	30.4	42	34.5	28.3	19.5	-1.34	0.389	-1.08	0.805	1.95
A5X6X5	Titin a OS=Danio rerio OX=7955 GN=ttn.2 PE=4 SV=1	ttn.2	485	3.82791e+09	2.93399e+09	3.59254e+09	2.09955e+09	1.74821e+09	2.80854e+09	1.12731e+09	4.72773e+09	9.60864e+09	1.11904e+09	1.25004e+09	2.47042e+09	2.78614e+09	2.82463e+09	2.43123e+09	4.19773e+09	3.35038e+09	3.48899e+09	4.11423e+09	2.31236e+09	2.95375e+09	-0.0087254	-0.161038	-0.0723251	3.60513e+09	3.03275e+09	4.92791e+09	1.39529e+09	1.1539e+09	3.17922e+09	-0.412255	-0.419668	-0.190341	2.81904e+09	2.99526e+09	2.79438e+09	12.4	29.2	25.2	57.9	3.82	-1.18	0.388	-2.02	0.112	1.05
Q92005	Elongation factor 1-alpha OS=Danio rerio OX=7955 GN=eef1a PE=2 SV=1	eef1a	34	5.26073e+10	4.96378e+10	2.59817e+09	3.92215e+09	5.01024e+09	5.49387e+09	2.52021e+09	4.31067e+09	4.66584e+09	2.80207e+09	6.18411e+09	4.48468e+09	4.4172e+09	3.89972e+09	3.6576e+09	6.00212e+10	5.09872e+10	2.37958e+09	6.94738e+09	5.83961e+09	5.71988e+09	-0.936483	-0.941077	0.380887	2.37576e+09	2.47736e+09	2.48298e+09	4.36062e+09	4.18297e+09	7.38224e+09	0.263746	0.227496	0.473214	3.94269e+09	3.92799e+09	4.05522e+09	82	11	2.47	33.9	1.75	-6.13	0.388	2.17	0.0551	-15.5
F1R979	Selectin P (Fragment) OS=Danio rerio OX=7955 GN=selp PE=4 SV=2	selp	1	6.48562e+06	5.69973e+06	6.66365e+06	39658464	7.2272e+06	5.41891e+06	14028567	17909227	1.22836e+07	23275118	12263880	1.44334e+07	1.91173e+07	16519515	10139959	7.05795e+06	5.79872e+06	6.05395e+06	6.56025e+07	8.32271e+06	5.59213e+06	0.968242	0.156933	-0.0344612	1.32221e+07	1.11243e+07	7.24393e+06	3.4514e+07	8.878e+06	2.19881e+07	0.416696	-0.0979593	0.482213	1.73173e+07	1.66072e+07	1.10514e+07	10.6	128	28.8	58.8	22.9	4.2	0.387	2.07	0.262	1.67
E7F1R8	FERM, RhoGEF (ARHGEF) and pleckstrin domain protein 1 (chondrocyte-derived) OS=Danio rerio OX=7955 GN=farp1 PE=1 SV=1	farp1	1	0	0	0	0	1.76744e+06	0	0	0	0	0	0	0	0	0	0	178286	218142	422401	120501	2.00989e+06	1.21478e+06	-0.170126	0.964433	0.458772	924615	838691	283404	114344	307883	991453	-0.907746	-0.435217	0.543867	550894	660726	842794	48	85.1	51	97.8	21.5	4.09	0.384	-1.45	0.458	2.5
A0A2C9F1K3	Sodium channel protein OS=Danio rerio OX=7955 GN=scn4ab PE=3 SV=1	scn4ab	6	0	12331111	0	0	1.79633e+07	0	2.44125e+07	1.32986e+07	4.44379e+07	7.51839e+06	2.64248e+07	0	4.66793e+06	4.38631e+06	4.63022e+06	2.6298e+06	3.09818e+06	2.65381e+06	2.84453e+06	1.45453e+07	3.0692e+06	0.0340874	0.671616	0.063155	2.35658e+07	3.32385e+07	2.65663e+07	8.86457e+06	1.24146e+07	9.37764e+06	-0.424624	-0.427707	-0.452238	6.21469e+06	7.3395e+06	6.9214e+06	9.44	98.1	17.8	18.8	8.33	2.44	0.383	-2.72	0.00231	9.95
E7F0P6	Sprouty-related, EVH1 domain-containing 2a OS=Danio rerio OX=7955 GN=spred2a PE=4 SV=1	spred2a	2	0	0	0	0	6.35412e+06	0	0	2.87862e+06	0	3.64088e+06	0	0	0	0	0	543120	436568	879856	632790	7.26728e+06	667052	0.066364	1.22132	-0.120252	631419	2.498e+06	811014	5.09651e+06	1.75608e+06	670298	0.906955	-0.153048	-0.0827604	1.01579e+06	1.23272e+06	794428	37.3	134	78.4	92	21.6	4.61	0.382	1.91	0.519	2.12
F1QVW0	Natriuretic peptide A OS=Danio rerio OX=7955 GN=nppa PE=1 SV=1	nppa	3	1.16654e+07	1.04961e+07	7.72976e+06	1.54382e+07	65045587	7.70896e+06	27348581	7.36762e+07	7.50336e+07	2.58194e+07	7.02659e+07	6.69068e+06	2.76125e+07	2.78673e+07	2.43155e+07	2.05794e+07	1.09019e+07	7.26043e+06	2.46795e+07	7.67316e+07	8.06514e+06	0.0789033	0.847471	0.0456494	2.63711e+07	4.50393e+07	4.27617e+07	3.89316e+07	4.98711e+07	1.0647e+07	0.169174	0.0442566	-0.603828	2.57987e+07	2.90543e+07	2.75315e+07	53.3	98.2	26.8	61.1	5.93	2.83	0.379	-1.15	0.604	2.95
A4QNV1	ATP-dependent 6-phosphofructokinase OS=Danio rerio OX=7955 GN=pfkmb PE=2 SV=1	pfkmb	9	3.35541e+06	2.44415e+06	7.04663e+06	0	1.16757e+08	1.86832e+06	49764739	1.1778e+08	1.71142e+08	2.08901e+07	60769217	4.58211e+06	4.37204e+07	3.31117e+07	3.38899e+07	7.50587e+06	6.50963e+06	7.07965e+06	7.66604e+06	2.30252e+07	7.05791e+06	0.00917025	0.548646	-0.0013357	7.01705e+07	7.34116e+07	9.26822e+07	3.08484e+07	4.05707e+07	4.94316e+07	-0.356922	-0.257552	-0.272992	4.15013e+07	3.43493e+07	3.83571e+07	7.11	71.9	15.5	23.1	9.42	1.79	0.379	-1.96	0.0193	11.2
Q9C075	Keratin, type I cytoskeletal 23 OS=Homo sapiens GN=KRT23 PE=1 SV=2	KRT23	8	6.45117e+07	7.05434e+07	127896578	3.60774e+07	2.04042e+07	9.08024e+07	5.92514e+07	7.20261e+07	2.75109e+07	2.01046e+09	4.294e+07	3.46621e+07	1.66722e+08	1.78056e+08	1.87605e+08	7.32767e+07	7.46813e+07	8.48857e+07	6.25748e+07	3.66063e+07	8.68164e+07	-0.0685667	-0.309656	0.009767	5.73726e+07	4.54308e+07	1.82581e+07	3.29975e+09	3.24988e+07	5.82316e+07	1.75978	-0.145484	0.503703	1.5137e+08	1.81128e+08	2.09001e+08	8.16	40.5	49.7	166	16	-1.25	0.378	28	0.38	-1.92
Q6DC80	Srl protein (Fragment) OS=Danio rerio OX=7955 GN=srl PE=2 SV=1	srl	5	0	3579989	881212	1.35135e+06	1.22141e+07	1.62643e+06	9.87588e+06	1.87895e+07	2.54179e+07	1.5062e+07	1.84831e+07	2.9574e+06	5.53798e+06	1.17883e+07	5678208	3.89632e+06	6.52693e+06	2.63636e+06	5.63483e+06	8.26792e+06	3.95633e+06	0.160226	0.102687	0.176288	1.24268e+07	1.23619e+07	1.54822e+07	2.13285e+07	1.36743e+07	2.71077e+07	0.234603	0.0438195	0.243259	6.28354e+06	1.22092e+07	8.19553e+06	45.6	36.5	13.3	32.5	34	1.37	0.377	1.54	0.174	3.08
Q803Z5	Hbaa1 protein OS=Danio rerio OX=7955 GN=hbaa1 PE=2 SV=1	hbaa1	7	1.44072e+08	201387360	1.06076e+08	2.72325e+08	5.6463e+08	6.16207e+07	1.26052e+08	3.79897e+08	6.56982e+08	3.20724e+08	5.1033e+08	1.01571e+08	3.41829e+08	2.79331e+08	2.73732e+08	1.59309e+08	2.06319e+08	9.74179e+07	4.58329e+08	6.67786e+08	8.77872e+07	0.458936	0.510098	-0.0452075	1.30727e+08	2.48158e+08	3.56997e+08	4.69913e+08	3.53346e+08	1.66932e+08	0.555653	0.15347	-0.330125	3.07257e+08	2.81607e+08	3.0629e+08	35.4	72.6	46.1	46.3	4.87	2.62	0.376	1.35	0.532	1.59
F1QVX3	Myosin, heavy chain b OS=Danio rerio OX=7955 GN=myhb PE=1 SV=1	myhb	1	14176633	17509233	11392562	20260694	0	1.41124e+07	12263122	8.99995e+06	9.01248e+06	5.28211e+06	13439173	18048740	14907898	8.47608e+06	4.5266e+06	1.54928e+07	1.78355e+07	1.03163e+07	3.28736e+07	1.53466e+07	1.45919e+07	0.326717	-0.0652726	0.150586	1.15637e+07	5.7011e+06	5.36838e+06	7.56749e+06	9.71121e+06	2.76532e+07	-0.184146	0.231315	0.711902	1.35241e+07	8.51929e+06	4.91231e+06	26.4	49.4	46.2	73.6	48.1	1.44	0.375	1.99	0.293	-1.93
F1QC84	Coagulation factor XIII, A1 polypeptide a, tandem duplicate 1 OS=Danio rerio OX=7955 GN=f13a1a.1 PE=4 SV=1	f13a1a.1	2	0	0	0	0	1.16168e+07	0	0	0	0	9.54156e+06	0	0	0	0	0	670734	1.79182e+06	1.35033e+06	1.46407e+06	212387	719954	0.339011	-0.926167	-0.273136	308321	1.65871e+06	1.23912e+06	4.81435e+06	467715	738783	1.19353	-0.549789	-0.224595	553658	666056	728145	44.4	78.8	64.7	121	13.6	-1.59	0.375	1.88	0.735	-1.19
G1K2E7	Cadherin-2 OS=Danio rerio OX=7955 GN=cdh2 PE=1 SV=1	cdh2	20	7.00218e+06	6372517	8.05208e+06	3.06855e+06	4.2425e+08	4.45568e+06	345299417	8.79582e+08	704011058	204940039	7.1774e+08	2.18461e+06	2.53527e+08	2.35148e+08	2.36102e+08	1.67276e+07	1.57796e+07	1.26321e+07	1.26492e+07	6.83001e+07	2.11544e+07	-0.121372	0.636324	0.223924	3.53016e+08	5.2895e+08	3.98068e+08	3.0058e+08	5.05909e+08	4.23739e+08	-0.0698337	-0.019342	0.0271415	2.18954e+08	2.44898e+08	2.47564e+08	14.2	88.1	21.4	25.2	6.66	2.26	0.374	-1.04	0.819	28.4
F1QJU0	Wu:fc21g02 OS=Danio rerio OX=7955 GN=wu:fc21g02 PE=1 SV=2	wu:fc21g02	2	2.51227e+06	0	3.02457e+06	2.24621e+06	23737455	0	5216493	9.59627e+06	3.75411e+06	18403552	32345463	0	4.00331e+06	5369800	4.65691e+06	3.06821e+06	1.10205e+07	2.92815e+06	3.51352e+06	1.2106e+07	1.547e+07	0.0588574	0.0408016	0.722898	5.0512e+06	6.17842e+06	2.74426e+06	2.67093e+07	2.32574e+07	3.38935e+07	0.723267	0.575683	1.09169	4.27381e+06	6.23125e+06	5.42918e+06	81.7	59.5	37.6	19.4	18.5	1.83	0.374	6	0.00807	-1.22
E7F957	Sidekick cell adhesion molecule 1a OS=Danio rerio OX=7955 GN=sdk1a PE=4 SV=2	sdk1a	26	1.30446e+07	1.95855e+07	11589712	1.20964e+07	2.97593e+08	5.80022e+06	1.66734e+08	298553981	324537013	1.03149e+08	2.84204e+08	1.97807e+07	106529723	9.59777e+07	9.77526e+07	2.71306e+07	2.90145e+07	4.30269e+07	3.1552e+07	6.68596e+07	3.68643e+07	0.0655684	0.362549	-0.0671342	1.68437e+08	1.88476e+08	1.90244e+08	1.50794e+08	1.82807e+08	1.83544e+08	-0.0480523	-0.0132633	-0.0155692	1.03999e+08	1.11238e+08	1.04082e+08	26.3	42.2	6.64	10.8	3.9	1.36	0.373	-1.06	0.488	5.52
F1R665	Caveolae-associated protein 2b OS=Danio rerio OX=7955 GN=cavin2b PE=1 SV=1	cavin2b	8	3.17773e+06	1.28293e+07	5.60115e+06	3280155	2.86782e+07	13053115	2.34412e+07	4.49654e+07	4.20849e+07	2.00987e+07	6.98376e+07	3.42435e+06	1.55846e+07	2.063e+07	1.85588e+07	7.54313e+06	1.57588e+07	8.47226e+06	7.87718e+06	3.42028e+07	1.69354e+07	0.0188193	0.33654	0.300796	2.66828e+07	2.9464e+07	2.52877e+07	2.98877e+07	5.07809e+07	2.43993e+07	0.049261	0.236409	-0.0155331	2.25706e+07	2.30563e+07	2.10481e+07	42.5	68	7.83	39.7	4.71	1.86	0.371	1.29	0.444	2.56
E7F876	Kinase D-interacting substrate of 220 kDa B OS=Danio rerio OX=7955 GN=kidins220b PE=1 SV=1	kidins220b	8	1.17539e+06	3.24106e+06	7.31383e+07	19640333	3.53155e+07	2.70094e+07	3.63054e+07	6.05582e+07	4.99385e+07	2.3531e+07	204546006	3.10984e+07	5.22316e+07	42994029	3.89008e+07	3.44583e+06	5.52612e+06	6.80211e+07	3.39965e+07	3.11483e+07	2.93075e+07	0.994141	0.751013	-0.365665	4.62981e+07	3.80895e+07	2.9802e+07	3.60327e+07	1.41822e+08	5.23152e+07	-0.108866	0.570938	0.244383	4.79649e+07	4.51533e+07	4.51081e+07	143	7.5	21.7	74.2	3.55	1.23	0.371	2.02	0.315	1.48
F1Q9A0	Sorbin and SH3 domain-containing 2a (Fragment) OS=Danio rerio OX=7955 GN=sorbs2a PE=1 SV=1	sorbs2a	41	1.86907e+09	2.2322e+09	2.25888e+09	1.20093e+09	1.86246e+08	2.03365e+09	1.08889e+08	3.18964e+08	3.76922e+08	5.34791e+07	3.22928e+08	1.49954e+09	1.10096e+09	1.01096e+09	9.01501e+08	2.06589e+09	2.29491e+09	2.01934e+09	2.01508e+09	6.11708e+08	1.99613e+09	-0.0108154	-0.574222	-0.00501874	1.54345e+08	2.1188e+08	2.2008e+08	1.65721e+08	2.3976e+08	2.02517e+09	0.0308863	0.0536884	0.963882	1.0113e+09	1.02155e+09	1.0173e+09	6.94	52.2	18.3	130	0.507	-1.38	0.371	4.15	0.411	-10.9
F1QG85	Integrin beta OS=Danio rerio OX=7955 GN=itgb1a PE=3 SV=1	itgb1a	11	114952876	48662896	7.98714e+06	4.85649e+07	1.6011e+08	2.04414e+07	1.23504e+08	1.76861e+08	1.76486e+08	1.83907e+08	2.46863e+08	4.5102e+07	7.29421e+07	58589550	6.11862e+07	1.31921e+08	5.40411e+07	9.90822e+07	8.69712e+07	7.53944e+07	2.36504e+07	-0.180937	0.144615	-0.622157	1.17141e+08	1.09014e+08	1.01558e+08	2.81587e+08	1.62805e+08	1.71456e+08	0.380902	0.174185	0.227436	6.90764e+07	6.12374e+07	6.85204e+07	41.2	54.4	7.13	32.3	6.6	-1.53	0.369	1.88	0.0681	1.15
Q7ZTH6	Hydroxyacyl-Coenzyme A dehydrogenase/3-ketoacyl-Coenzyme A thiolase/enoyl-Coenzyme A hydratase (Trifunctional protein), beta subunit OS=Danio rerio OX=7955 GN=hadhb PE=2 SV=1	hadhb	8	1.31698e+08	9.00966e+07	1.22626e+08	2.7283e+07	1.49103e+08	28671084	1.03937e+08	2.20983e+08	2.73901e+08	6.45346e+07	1.50572e+08	1.85018e+07	1.29236e+08	8.99e+07	128906026	1.45044e+08	9.33617e+07	1.18687e+08	6.58963e+07	1.55686e+08	3.13438e+07	-0.342638	0.222081	-0.578249	9.78668e+07	1.34023e+08	1.54343e+08	9.50486e+07	1.01392e+08	6.43472e+07	-0.0126896	-0.121178	-0.379958	1.16934e+08	9.03722e+07	1.41214e+08	21.7	76.1	22.2	22.8	21.9	-1.41	0.367	-1.48	0.114	1.08
Q5TZ42	CDC42-binding protein kinase beta (DMPK-like) OS=Danio rerio OX=7955 GN=cdc42bpb PE=1 SV=1	cdc42bpb	37	3.23218e+07	7.82233e+07	8.48986e+07	5.74935e+07	2.27984e+08	3.57599e+07	2.34919e+08	3.8904e+08	4.30298e+08	1.09926e+08	2.94019e+08	4.18087e+07	1.73533e+08	1.42261e+08	1.12188e+08	5.03949e+07	9.05099e+07	7.07079e+07	1.19346e+08	1.12097e+08	5.83616e+07	0.374421	0.0928973	-0.083341	2.58442e+08	2.50162e+08	2.40358e+08	1.61179e+08	2.0018e+08	2.14078e+08	-0.205055	-0.096801	-0.0502871	1.56104e+08	1.47091e+08	1.15902e+08	28.4	34.5	3.63	14.3	15.1	1.37	0.364	-1.3	0.0799	3.54
F1QTT3	Junction plakoglobin a OS=Danio rerio OX=7955 GN=jupa PE=1 SV=1	jupa	8	8.56859e+07	6.78267e+07	1.21016e+08	7.82705e+07	9.26214e+07	9.36607e+07	7.78934e+07	97266476	9.42439e+07	5.73622e+07	1.07323e+08	9.31282e+07	1.03796e+08	9.91989e+07	8.71299e+07	9.69901e+07	7.13506e+07	1.09445e+08	1.33094e+08	9.53264e+07	9.92888e+07	0.137433	0.125816	-0.0422941	7.33817e+07	6.06977e+07	5.4891e+07	8.53386e+07	7.71154e+07	1.53775e+08	0.0655576	0.103969	0.447385	9.4586e+07	1.01337e+08	9.60406e+07	21	19	15	39.9	3.65	1.18	0.364	1.67	0.147	-1.47
F6PC65	Solute carrier family 8 (sodium/calcium exchanger), member 1a OS=Danio rerio OX=7955 GN=slc8a1a PE=1 SV=1	slc8a1a	50	5.2969e+08	4.6959e+08	5.16437e+08	2.39869e+08	5.07435e+09	3.0493e+08	6.61577e+09	1.0725e+10	9.56135e+09	2.87763e+09	8.60425e+09	3.52372e+08	4.12575e+09	3.56281e+09	3.26938e+09	5.9103e+08	5.37494e+08	6.18632e+08	1.11604e+09	4.48191e+09	4.32365e+08	0.276069	0.921089	-0.155582	6.19244e+09	6.09102e+09	5.02548e+09	4.41411e+09	5.78456e+09	2.87474e+09	-0.147019	-0.0224194	-0.24258	3.74842e+09	3.60152e+09	3.61081e+09	7.08	108	11.2	33.4	2.25	3.45	0.36	-1.32	0.257	9.91
Q7ZV05	Ribosomal protein S11 OS=Danio rerio OX=7955 GN=rps11 PE=1 SV=1	rps11	7	1.34786e+06	15173388	1.11455e+07	6.30771e+06	1.06832e+08	1.09124e+07	3.92279e+07	80151041	140228259	3.42281e+07	1.19721e+08	5.9822e+06	63322727	3.76678e+07	35486782	1.11673e+07	1.76417e+07	1.16589e+07	1.61505e+07	8.29851e+07	1.33703e+07	0.16024	0.672459	0.0594841	4.30396e+07	5.00781e+07	8.11353e+07	5.17846e+07	8.5372e+07	5.10008e+07	0.0803315	0.231668	-0.201633	5.82563e+07	3.95438e+07	4.01634e+07	26.7	105	34.9	31.3	23.1	2.78	0.359	1.08	0.757	4.31
A0A0R4INA4	Non-specific serine/threonine protein kinase OS=Danio rerio OX=7955 GN=pak4 PE=1 SV=1	pak4	1	0	0	0	0	727861	0	1.46957e+06	0	1.43621e+06	1.09528e+06	1.3754e+06	0	0	0	0	396982	176116	451783	222969	821172	1.05183e+06	-0.250525	0.668634	0.367017	1.39638e+06	1.10231e+06	907865	1.51286e+06	1.03974e+06	2.10467e+06	0.0347962	-0.0253762	0.365163	208143	243393	287033	42.7	61.2	21.7	34.4	16.1	2.05	0.357	1.37	0.307	3.32
A7YYH6	Ralgps2 protein OS=Danio rerio OX=7955 GN=ralgps2 PE=2 SV=1	ralgps2	1	0	0	0	0	1.7558e+06	0	3.61727e+06	4539763	4.55123e+06	1.54664e+06	2.21527e+06	0	2.2976e+06	1.2087e+06	1904317	175321	989809	196337	290326	1.99654e+06	696013	0.219053	0.304727	0.549614	3.42599e+06	2.93242e+06	2.77158e+06	2.15349e+06	1.65892e+06	3.1403e+06	-0.201642	-0.2474	0.0542442	2.10745e+06	1.2141e+06	2.05705e+06	102	89.6	11.2	32.5	28	2.19	0.356	-1.31	0.238	6.71
A9C3S8	Si:dkey-20d21.12 OS=Danio rerio OX=7955 GN=si:dkey-20d21.12 PE=4 SV=1	si:dkey-20d21.12	5	0	0	0	0	2.66359e+07	0	6.97617e+06	1.62223e+07	2.03482e+07	1.65606e+07	7.26834e+07	0	10782709	1029210	9.9522e+06	1.68132e+06	2.27739e+06	2.26897e+06	2.716e+06	4.88063e+06	1.82573e+06	0.208279	0.331037	-0.0943937	7.46496e+06	1.23486e+07	1.36349e+07	2.59764e+07	2.33978e+07	2.05566e+07	0.541552	0.277557	0.1783	1.03296e+07	9.76115e+06	1.34388e+07	16.5	50	29.2	11.6	17.7	1.51	0.356	2.09	0.0418	5.37
A0A0R4IUS4	Filamin C, gamma a (actin-binding protein 280) OS=Danio rerio OX=7955 GN=flnca PE=1 SV=1	flnca	61	4.94602e+08	5.41412e+08	4.13354e+08	4.09151e+08	4.38536e+08	5.99182e+08	1.1521e+08	5.48839e+08	1.40373e+09	88421044	2.40336e+08	3.88451e+08	5.28544e+08	4.60312e+08	4.22583e+08	5.62732e+08	5.61873e+08	3.67176e+08	6.78028e+08	4.95035e+08	5.9368e+08	0.0809461	-0.0550022	0.208678	2.78874e+08	3.52556e+08	7.39414e+08	2.10873e+08	2.22797e+08	5.62288e+08	-0.121387	-0.199319	-0.118929	4.95242e+08	4.72136e+08	4.69027e+08	22.7	15.6	54.1	60.1	2.99	1.18	0.356	-1.38	0.48	-1.09
Q6IQP4	RAP1A, member of RAS oncogene family OS=Danio rerio OX=7955 GN=rap1aa PE=1 SV=1	rap1aa	1	0	0	0	0	4.50772e+06	0	1.3049e+06	3.2854e+06	2.00125e+06	2531810	4418357	0	1.86057e+06	1.87112e+06	1041799	439954	168819	188168	273796	85566.8	143959	-0.205981	-0.295117	-0.116307	1.24044e+06	2.14183e+06	1.25153e+06	3.5658e+06	3.26381e+06	4.96081e+06	0.458581	0.18294	0.59811	1.70871e+06	1.87975e+06	1.12174e+06	56.9	57.4	33.5	23	25.3	-1.58	0.355	2.54	0.0158	5.81
Q6DHH1	Sarcoglycan, epsilon OS=Danio rerio OX=7955 GN=sgce PE=2 SV=1	sgce	5	0	0	0	0	47347116	0	1.02858e+08	143661944	1.22029e+08	3.25338e+07	7.2245e+07	0	24116317	3.83701e+07	4.82753e+07	2.65467e+06	2.38685e+06	1.88743e+06	1.87181e+06	5.402e+06	3.59837e+06	-0.151749	0.35473	0.280236	1.09598e+08	8.74427e+07	7.0263e+07	4.76884e+07	4.57574e+07	7.06981e+07	-0.361391	-0.281262	0.00268084	2.32565e+07	3.97175e+07	5.33904e+07	16.9	48.7	22.1	25.4	38.9	1.57	0.354	-1.63	0.0604	38.6
E7F8B7	Pleckstrin homology domain-containing, family A member 7b OS=Danio rerio OX=7955 GN=plekha7b PE=4 SV=2	plekha7b	60	2.37503e+08	3.75518e+08	5.15203e+08	5.18261e+08	1.18826e+09	229217965	4.56765e+09	4.35794e+09	3.30418e+09	3.58351e+08	2.89255e+09	1.20214e+08	1.4315e+09	1.27449e+09	1.16367e+09	3.20134e+08	3.61742e+08	4.4961e+08	1.01883e+09	1.09855e+09	2.56499e+08	0.502768	0.482423	-0.24375	4.31358e+09	2.57628e+09	1.82028e+09	5.32884e+08	1.8592e+09	5.82192e+08	-0.908205	-0.141667	-0.495073	1.29722e+09	1.31131e+09	1.28711e+09	17.5	58.7	44	75.8	0.936	2.1	0.352	-2.93	0.0789	7.7
A0A2L2BH75	Zonula occludens-1 OS=Danio rerio OX=7955 GN=zo1.1 PE=2 SV=1	tjp1a	42	1.16348e+08	1.8186e+08	1.69169e+08	5.74981e+07	4.71981e+08	1.43963e+08	3.55382e+08	5.5442e+08	8.77432e+08	1.91797e+08	5.72367e+08	7.62617e+07	3.44926e+08	3.0288e+08	2.92655e+08	1.59482e+08	1.91448e+08	1.62219e+08	1.95347e+08	4.73947e+08	1.70226e+08	0.088094	0.39368	0.0209244	3.38929e+08	3.75943e+08	4.92991e+08	2.91473e+08	3.78694e+08	3.51023e+08	-0.06551	0.00316581	-0.147504	3.20864e+08	3.53143e+08	3.47833e+08	10.4	60.2	20	13.1	5.08	1.64	0.352	-1.18	0.309	2.35
B2GTW6	Citrate synthase OS=Danio rerio OX=7955 GN=cs PE=1 SV=1	cs	1	0	0	4.04936e+06	2.00326e+06	1.96548e+06	0	1854396	2.23354e+06	2.03942e+06	0	4.78189e+06	1.73343e+06	2.3572e+06	2.21871e+06	2868873	182766	476972	3.69006e+06	3.04104e+06	2.23722e+06	1.18384e+06	1.22113	0.671216	-0.493742	1.76056e+06	1.47221e+06	1.27463e+06	7.01497e+06	3.52682e+06	2.50162e+06	0.600375	0.379414	0.292838	2.16179e+06	2.22906e+06	3.10576e+06	134	43.2	16.3	54.4	21.1	1.49	0.35	2.89	0.0734	1.04
F8W315	Palladin, cytoskeletal-associated protein OS=Danio rerio OX=7955 GN=palld PE=1 SV=3	palld	20	2.55031e+08	2.74891e+08	2.41156e+08	1.72824e+08	3.14126e+07	2.10366e+08	2.6477e+07	1.62272e+10	1.74038e+10	2.08203e+07	2.87617e+07	1.7311e+08	1.02204e+08	9.05058e+07	8.98489e+07	2.79737e+08	2.74283e+08	2.20088e+08	2.7231e+08	1.27468e+08	2.14829e+08	-0.0116863	-0.332799	-0.0105028	7.98938e+09	8.3146e+09	8.1301e+09	4.17171e+07	4.55398e+07	1.51814e+08	-2.2822	-2.26145	-1.72879	1.11867e+08	1.03721e+08	9.89881e+07	12.8	35.6	2	78.4	6.21	-1.26	0.35	-102	0.00737	31.6
B3DFS9	Myosin, heavy chain 11a, smooth muscle OS=Danio rerio OX=7955 GN=myh11a PE=1 SV=1	myh11a	3	4.08085e+06	7.39773e+06	17807013	1.0699e+06	0	9.93922e+06	3.1861e+06	3.04446e+06	6.84926e+06	2.13848e+06	9.48866e+06	1.46e+06	6.80534e+06	7.14636e+06	6.52449e+06	4.58207e+06	7.89213e+06	1.64177e+07	2.2311e+06	4.11575e+06	1.02517e+07	-0.312542	-0.282745	-0.204515	4.35371e+06	2.31409e+06	4.26475e+06	3.4066e+06	7.94406e+06	3.50894e+06	-0.106538	0.535663	-0.0847177	6.88951e+06	7.57052e+06	7.06749e+06	63.4	75.8	31.6	52.3	4.92	-1.74	0.349	1.36	0.491	-2.64
F6NYT7	Glutathione peroxidase OS=Danio rerio OX=7955 GN=gpx1a PE=1 SV=1	gpx1a	5	884336	1.34292e+06	799111	0	3.32132e+07	729166	20265176	6.52355e+07	61953205	2.13241e+07	27954128	684858	7.92008e+06	12648377	1.03843e+07	2.50072e+06	3.16067e+06	2.387e+06	3.07161e+06	1.89568e+07	3.00352e+06	0.0893002	0.777985	0.0997781	4.0481e+07	4.08577e+07	3.64488e+07	2.334e+07	2.12766e+07	2.86328e+07	-0.239151	-0.283371	-0.10482	8.8369e+06	1.31462e+07	1.27907e+07	15.6	110	6.22	15.5	20.6	3.11	0.348	-1.61	0.0195	14.6
F1Q571	RALBP1-associated Eps domain-containing 1 OS=Danio rerio OX=7955 GN=reps1 PE=1 SV=1	reps1	1	1.10431e+06	1.92069e+06	1.86399e+06	1.02287e+06	2.41514e+06	1.89359e+06	0	3677934	3.89237e+06	0	3278979	1.48105e+06	3261738	2.89151e+06	1.38868e+06	1.19034e+06	1.95169e+06	1.70667e+06	1.52303e+06	2.75412e+06	1.94996e+06	0.107037	0.149571	0.0578765	2.97246e+06	2.39003e+06	2.38237e+06	3.43476e+06	2.4365e+06	2.12883e+06	0.0627802	0.00836272	-0.0488697	2.98562e+06	2.90525e+06	1.49753e+06	24	30.1	13.1	25.6	34	1.28	0.348	1.03	0.922	1.6
Q6Q415	60S ribosomal protein L36 OS=Danio rerio OX=7955 GN=rpl36 PE=3 SV=1	rpl36	1	0	0	0	0	5917348	0	0	3.03406e+06	7.53726e+06	1204356	3.22765e+06	0	2.2838e+06	2.39451e+06	2.46155e+06	538180	186554	804834	421676	227436	152767	-0.105949	0.0860548	-0.721677	2.80634e+06	1.98247e+06	4.51569e+06	1.6672e+06	2.3991e+06	5.22318e+06	-0.226154	0.0828425	0.0632108	2.09486e+06	2.40575e+06	2.66263e+06	60.8	51.9	41.7	60.6	11.9	-1.91	0.348	-1	0.89	6.08
F1QL44	Filamin C, gamma b (actin-binding protein 280) OS=Danio rerio OX=7955 GN=flncb PE=1 SV=2	flncb	7	1.22558e+07	1.00449e+07	2.33076e+07	1.38954e+07	1.25585e+07	2.3585e+07	14701483	1.92433e+07	3.9029e+07	2.23392e+07	16842207	2.87277e+07	1.6119e+07	1.90375e+07	1.90492e+07	1.59382e+07	1.24676e+07	2.22946e+07	2.80513e+07	1.46146e+07	2.5093e+07	0.245515	0.0690046	0.0513531	1.69369e+07	1.42584e+07	2.35089e+07	3.44761e+07	1.4576e+07	4.38946e+07	0.308683	0.00956833	0.27118	1.63743e+07	1.97834e+07	2.15901e+07	29.5	31.3	26.1	48.3	13.8	1.34	0.347	1.7	0.311	1.08
Q2MJQ9	Histone methyltransferase SmyD1a OS=Danio rerio OX=7955 GN=smyd1b PE=1 SV=1	smyd1b	1	1.67478e+06	1.89479e+06	1.04324e+06	1.78907e+06	1.56489e+06	1.61913e+06	0	0	2.07899e+06	0	1.23769e+06	2.08239e+06	0	2.0192e+06	1.27611e+06	1.80931e+06	1.92534e+06	958586	2.70707e+06	1.77762e+06	1.6668e+06	0.174986	-0.0346684	0.240252	303927	1.13105e+06	1.29855e+06	463860	937592	3.01933e+06	0.183619	-0.0814683	0.366452	1.99522e+06	2.02856e+06	1.37553e+06	33.7	27.9	58.4	92.3	20.4	1.31	0.347	1.62	0.642	-1.72
G1K2X0	Titin, tandem duplicate 1 OS=Danio rerio OX=7955 GN=ttn.1 PE=1 SV=2	ttn.1	325	1.76595e+09	1.14033e+09	1.6802e+09	9.39775e+08	8.73567e+08	1.03237e+09	6.04679e+08	2.57349e+09	4.80516e+09	6.77546e+08	7.89326e+08	9.01474e+08	1413636965	1.17042e+09	1.11461e+09	1.95094e+09	1.35073e+09	1.81317e+09	1.93873e+09	1.06039e+09	1.1103e+09	-0.00272725	-0.105102	-0.212995	2.04503e+09	1.64095e+09	2.52321e+09	1.13656e+09	6.67036e+08	1.36353e+09	-0.255106	-0.390945	-0.267287	1.41209e+09	1.34204e+09	1.36524e+09	18.4	36	21.3	33.6	2.6	-1.24	0.347	-1.96	0.0614	1.21
A0A286Y8Z9	Teneurin transmembrane protein 1 OS=Danio rerio OX=7955 GN=tenm1 PE=4 SV=1	tenm1	1	0	0	0	0	0	0	2356498	3.3997e+06	3.13626e+06	0	0	0	0	0	0	935803	942777	162597	267905	455509	119296	-0.543204	-0.315912	-0.134487	2.23533e+06	2.21419e+06	1.93305e+06	193407	330885	254967	-1.06287	-0.825538	-0.879758	1.019e+06	635179	336556	65.9	60	7.93	26.5	51.6	-2.42	0.347	-8.19	0.00291	3.13
A0A0R4IB44	Plexin b2a OS=Danio rerio OX=7955 GN=plxnb2a PE=1 SV=1	plxnb2a	2	0	0	0	0	4.89202e+06	0	4.18629e+06	3.94786e+06	8.74634e+06	2.87457e+06	8.35468e+06	0	1.95717e+06	905481	1062395	1.20502e+06	444628	994659	792386	5.57988e+06	1.14882e+06	-0.182057	1.09863	0.0625766	3.97267e+06	4.21933e+06	5.33009e+06	3.99608e+06	6.17815e+06	7.58228e+06	0.00255138	0.165616	0.153065	2.4492e+06	1.47713e+06	1.6676e+06	44.5	106	16	30.5	27.6	2.84	0.345	1.31	0.327	5.11
Q5TZI2	Protein phosphatase, Mg2+/Mn2+-dependent, 1Ab OS=Danio rerio OX=7955 GN=ppm1ab PE=3 SV=1	ppm1ab	4	11843203	1.01983e+07	3.30135e+06	2.06138e+06	2.82294e+07	2.40478e+06	1.80678e+07	5.06468e+07	16802938	1.02922e+07	23116864	3.37197e+06	0	14475957	14059246	1.46453e+07	1.12875e+07	7.82289e+06	4.70309e+06	1.48954e+07	3.80761e+06	-0.493316	0.120456	-0.312715	1.74144e+07	2.61312e+07	2.01461e+07	8.55655e+06	1.08649e+07	6.45203e+06	-0.308609	-0.381135	-0.494495	1.73478e+07	1.52431e+07	1.6837e+07	30.3	78.9	21	25.6	6.66	-1.44	0.345	-2.46	0.0103	1.89
R4GEZ2	Si:ch211-132g1.3 OS=Danio rerio OX=7955 GN=si:ch211-132g1.3 PE=1 SV=1	si:ch211-132g1.3	2	7.16717e+06	0	0	0	18473639	0	24584280	26271074	41463288	1.82649e+07	46989775	0	16835573	1.31778e+07	1.32117e+07	1.23154e+06	577516	686760	1.34381e+06	697793	1.53186e+06	0.0378891	0.0821625	0.348413	2.31746e+07	1.64539e+07	2.40164e+07	2.65404e+07	3.35488e+07	5.98757e+07	0.0588937	0.309408	0.396742	1.53205e+07	1.32441e+07	1.43686e+07	42.1	36.7	19.5	44	7.26	1.43	0.343	1.88	0.12	25.5
A0A0R4IAH3	Enoyl-CoA delta isomerase 2 OS=Danio rerio OX=7955 GN=eci2 PE=1 SV=1	eci2	3	5.52995e+06	845565	10061176	0	1.69946e+06	4834828	1.03392e+07	1.17276e+07	11476101	1.22852e+06	0	1.81956e+06	6.10318e+06	5.35488e+06	3.77789e+06	7.03693e+06	1.57545e+06	9.70739e+06	3.45838e+06	2.77365e+06	1.34658e+06	-0.308511	0.245647	-0.857869	9.78374e+06	1.07796e+07	7.02771e+06	2.75562e+06	3.87976e+06	3.04444e+06	-0.550285	-0.443796	-0.363307	5.83771e+06	5.98568e+06	5.78364e+06	67.9	42.6	21.1	18.1	1.78	-2.42	0.343	-2.85	0.00383	1.51
Q6P267	UBX domain protein 4 OS=Danio rerio OX=7955 GN=ubxn4 PE=2 SV=1	ubxn4	1	0	0	0	0	1.66226e+06	0	0	0	0	489558	0	0	0	0	0	209925	734740	646046	616179	1.88926e+06	531875	0.467642	0.410157	-0.084454	1.0774e+06	374466	751138	663675	207037	519483	-0.210423	-0.257364	-0.160148	438295	213183	592844	53	75.1	47.9	50.4	46	1.91	0.341	-1.58	0.365	1.38
F1Q7L0	Vitellogenin 4 (Fragment) OS=Danio rerio OX=7955 GN=vtg4 PE=1 SV=1	vtg4	10	3.25043e+07	2.43576e+07	3.74585e+07	2.77663e+07	2.59347e+08	1.0716e+07	9.94246e+07	2.81502e+08	3.44681e+08	59593915	1.33392e+08	8.19752e+06	1.0524e+08	9.63694e+07	8.04339e+07	3.72039e+07	3.78668e+07	3.609e+07	4.75929e+07	2.07389e+08	3.76538e+07	0.106953	0.738527	0.0184219	9.73604e+07	1.7824e+08	1.93746e+08	6.96158e+07	9.52971e+07	2.19335e+07	-0.145674	-0.271924	-0.946124	9.77539e+07	9.13692e+07	8.97484e+07	2.42	97.7	33.1	59.8	4.55	2.63	0.34	-2.51	0.129	4.22
Q6IQJ2	Tubulin beta chain OS=Danio rerio OX=7955 GN=zgc:55461 PE=1 SV=1	zgc:55461	25	329620970	3.74569e+08	6.15555e+08	2.84627e+08	1.50305e+09	4.14891e+08	8.33818e+08	1.27643e+09	1.89155e+09	5.73923e+08	1.22139e+09	381271433	752276486	7.28788e+08	7.02592e+08	3.70833e+08	4.00218e+08	5.58023e+08	5.41928e+08	1.69274e+09	4.33936e+08	0.164763	0.626292	-0.109226	8.06038e+08	7.69924e+08	1.04254e+09	8.56992e+08	8.35235e+08	8.01434e+08	0.0266216	0.0353608	-0.114224	6.70813e+08	7.35657e+08	7.8025e+08	22.7	78.4	17	3.37	7.55	2.01	0.34	-1.05	0.715	1.97
A0A1D5NS76	Tight junction protein 1b OS=Danio rerio OX=7955 GN=tjp1b PE=1 SV=1	tjp1b	5	2.47102e+06	3.8202e+06	4.84696e+06	0	1.38283e+07	3.41338e+06	6.69045e+06	1.65307e+07	1.76652e+07	4.32715e+06	1.15164e+07	1.13594e+06	6560663	9.3387e+06	6.19711e+06	3.70877e+06	5.64123e+06	5.39139e+06	7.73084e+06	1.00159e+07	4.065e+06	0.318997	0.249315	-0.12264	7.50199e+06	1.07912e+07	1.08515e+07	7.31168e+06	8.74963e+06	3.10942e+06	-0.0111595	-0.0910819	-0.542808	7.32126e+06	1.00049e+07	7.60208e+06	21.4	41.3	19.7	45.9	17.8	1.48	0.338	-1.52	0.257	1.98
E7EYQ0	SERPINE1 mRNA-binding protein 1b OS=Danio rerio OX=7955 GN=serbp1b PE=1 SV=2	serbp1b	1	4.18527e+06	7.65224e+06	6.96525e+06	5.39404e+06	5.26925e+06	7.98737e+06	3.44461e+06	8.29854e+06	7259212	2.87659e+06	1.43961e+07	7.29272e+06	6.17454e+06	6.72079e+06	7.46462e+06	4.54386e+06	7.78767e+06	6.32625e+06	8.42507e+06	6.05086e+06	8.24919e+06	0.268149	-0.109591	0.115265	3.26302e+06	5.26896e+06	4.3544e+06	4.06342e+06	1.03886e+07	1.09179e+07	0.0952712	0.294831	0.399211	5.6306e+06	6.75454e+06	8.12232e+06	26.1	17.5	23.4	45.1	18.3	1.22	0.338	1.97	0.191	-1.45
Q6P7E4	PDZ and LIM domain protein 7 OS=Danio rerio OX=7955 GN=pdlim7 PE=2 SV=1	pdlim7	1	1.19548e+06	1.05095e+06	0	803951	0	0	0	0	1.18098e+06	0	856158	0	0	874210	691255	1.28916e+06	1.0672e+06	1.09898e+06	1.1888e+06	405853	921577	-0.0352004	-0.419878	-0.0764594	709367	490964	751271	623197	653318	1.21064e+06	-0.0562455	0.124075	0.207218	1.05846e+06	878029	742671	10.4	47.5	21.5	39.9	17.7	-1.37	0.335	1.27	0.458	-1.77
A7E2H1	Zgc:152732 protein (Fragment) OS=Danio rerio OX=7955 GN=myh7l PE=2 SV=1	myh7l	2	53244890	57617258	3.84227e+07	9.79572e+06	1.20898e+08	8.37115e+07	6.64147e+06	4.57617e+07	8.57766e+07	6.90484e+06	6.38038e+07	20334380	44193472	3.93323e+07	35140420	5.90805e+07	5.91465e+07	3.55001e+07	4.0735e+07	1.41954e+08	8.68168e+07	-0.161476	0.380217	0.388374	6.37771e+06	2.78091e+07	4.03171e+07	1.03667e+07	4.49563e+07	3.1775e+07	0.210976	0.208603	-0.103404	4.06724e+07	4.00713e+07	3.88798e+07	26.6	56.4	69.1	60.1	2.29	1.75	0.334	1.17	0.753	-2.06
A0A0R4IKT8	Ryanodine receptor 2b (cardiac) OS=Danio rerio OX=7955 GN=ryr2b PE=4 SV=1	ryr2b	282	1.35265e+09	1.47733e+09	2.04031e+09	8.77597e+08	2.20618e+10	9.02864e+08	2.07144e+10	3.68141e+10	3.14723e+10	8.01034e+09	2.55213e+10	1.06009e+09	1.33637e+10	1.22735e+10	1.15328e+10	1.59731e+09	1.71278e+09	1.73291e+09	3.44145e+09	1.88195e+10	1.36178e+09	0.333353	1.04091	-0.104668	1.97086e+10	2.11796e+10	1.68796e+10	1.21178e+10	1.72661e+10	9.68259e+09	-0.211232	-0.0887233	-0.241372	1.20741e+10	1.24273e+10	1.27682e+10	4.35	121	11.3	29.7	2.79	4.68	0.333	-1.48	0.118	11.5
Q9PU58	Protein NipSnap homolog 2 OS=Danio rerio OX=7955 GN=nipsnap2 PE=2 SV=2	nipsnap2	5	4.90311e+06	1.07542e+07	1.38234e+07	6.90539e+06	20306513	0	1.45399e+07	5.89425e+07	4.34144e+07	1.24946e+07	1.54126e+07	0	6.04957e+06	51186619	4.89526e+06	7.13413e+06	1.2349e+07	1.28938e+07	1.3235e+07	1.026e+07	2.38292e+07	0.268383	-0.0804843	0.266728	2.45511e+07	3.78816e+07	2.56084e+07	8.96177e+06	1.259e+07	8.30673e+06	-0.437677	-0.478403	-0.488952	6.53817e+06	5.31799e+07	1.67662e+07	29.5	45.2	25.2	23.2	96.2	1.46	0.333	-2.95	0.00467	2.72
A0A0R4IV08	Amyloid beta (A4) precursor protein-binding, family B, member 2b OS=Danio rerio OX=7955 GN=apbb2b PE=4 SV=1	apbb2b	1	7997586	7406196	4891740	3.3056e+06	5.8173e+06	0	7.65467e+06	14788608	15850346	0	11138246	5.69316e+06	8.5873e+06	6.52884e+06	5.21826e+06	8.71318e+06	7.537e+06	4.45256e+06	5.09088e+06	6.68612e+06	1.98933e+06	-0.233384	-0.0520248	-0.349903	7.23035e+06	9.23625e+06	9.27055e+06	9.24128e+06	8.07852e+06	8.46948e+06	0.106573	-0.058164	-0.0392486	7.8156e+06	6.56157e+06	5.66719e+06	31.9	52	13.6	6.88	16.2	-1.5	0.327	1	0.944	1.24
A0A0R4IGX4	Troponin I4a OS=Danio rerio OX=7955 GN=tnni4a PE=1 SV=1	tnni4a	2	12271532	20343410	34734844	8.09168e+06	1.69787e+06	18346458	0	0	0	917003	0	10747467	23998472	0	0	1.39116e+07	2.09205e+07	2.63169e+07	1.3423e+07	2.02214e+06	1.90842e+07	-0.0155267	-1.01476	-0.139559	528516	206794	299475	1.5968e+06	2.78487e+06	1.68788e+07	0.480192	1.12927	1.75098	1.21488e+06	1.55044e+06	1.10047e+06	30.5	75.5	48	120	18.1	-1.77	0.326	20.5	0.0539	-59.1
Q6TGV4	Proteasome 26S subunit, non-ATPase, 13 (Fragment) OS=Danio rerio OX=7955 GN=psmd13 PE=2 SV=2	psmd13	1	0	0	0	0	2.21827e+06	0	0	3676363	0	0	0	0	0	0	0	258855	296037	269679	258858	2.5277e+06	457074	5.67201e-06	0.93138	0.22914	1.02393e+06	2.38904e+06	311470	194389	191323	479808	-0.721597	-1.09646	0.187651	413222	426011	424467	6.96	116	85	57.4	1.66	3.93	0.323	-4.3	0.157	4.52
A0A0R4I9C4	Triosephosphate isomerase OS=Danio rerio OX=7955 GN=tpi1b PE=1 SV=1	tpi1b	3	3.71621e+06	2.53418e+07	1.31102e+07	1093631	1.12291e+07	6.8602e+07	1.248e+07	4.83437e+06	4738515	5.65042e+06	1.43948e+07	1.51886e+06	14582470	1.3564e+07	1.64949e+07	4.41563e+06	1.7859e+07	1.30246e+07	1.27619e+07	1.30291e+07	5.64999e+07	0.460921	-0.136941	0.637282	1.24037e+07	4.0144e+06	3.35395e+06	8.97565e+06	1.06499e+07	3.10421e+06	-0.140484	0.423724	-0.0336051	1.38234e+07	1.49788e+07	1.96191e+07	57.9	91.8	76.5	52.3	19	2.33	0.321	1.15	0.751	-1.79
F1QDR0	Ubiquitin-associated protein 2a OS=Danio rerio OX=7955 GN=ubap2a PE=4 SV=1	ubap2a	1	5.54083e+06	6.26544e+06	0	2.89078e+06	1.11512e+06	3.5466e+06	0	0	0	0	0	3.68725e+06	1.44954e+06	1.45659e+06	0	6.02467e+06	6.37492e+06	2.75193e+06	4.43489e+06	1.26288e+06	3.65683e+06	-0.133051	-0.703112	0.123468	216938	616357	1.0368e+06	589819	158859	5.42486e+06	0.434383	-0.588821	0.718692	1.33319e+06	1.46319e+06	1.29041e+06	39.6	53	65.8	142	6.61	-1.62	0.321	3.3	0.729	-8.1
E7F049	Kinectin 1 OS=Danio rerio OX=7955 GN=ktn1 PE=1 SV=2	ktn1	2	9.90448e+06	1.37128e+07	0	1.51624e+07	0	2.39332e+07	10951122	0	18538942	2.74089e+06	0	7.95232e+06	15665342	10774303	7407171	1.07846e+07	1.39585e+07	4.3274e+07	2.41563e+07	2.52248e+08	2.47545e+07	0.350228	1.25699	-0.242573	1.04282e+07	7.60918e+06	1.17693e+07	4.07803e+06	5.52804e+06	1.17836e+07	-0.40776	-0.138767	0.000526612	1.51437e+07	1.11191e+07	8.71267e+06	79	131	21.4	57.4	27.9	4.43	0.32	-1.39	0.317	-2.28
Q3ZB93	Sarcoglycan, beta (Dystrophin-associated glycoprotein) OS=Danio rerio OX=7955 GN=sgcb PE=2 SV=1	sgcb	3	964793	0	0	679331	1.26792e+07	842782	15466324	48445335	70840349	9191607	3.23999e+07	576876	6764091	8.94343e+06	1.24278e+07	1.92991e+06	2.51397e+06	1.19884e+06	2.02528e+06	1.54007e+07	2.39849e+06	0.0209466	0.787181	0.301179	1.46246e+07	3.0168e+07	4.08078e+07	1.33285e+07	2.34713e+07	5.03081e+06	-0.0403016	-0.109009	-0.909105	9.37489e+06	9.45939e+06	1.34875e+07	35	115	46.1	66.2	21.8	3.51	0.32	-2.05	0.219	15.2
B8JIS1	ATP synthase, H+ transporting, mitochondrial Fo complex, subunit B1 OS=Danio rerio OX=7955 GN=atp5pb PE=1 SV=1	atp5pb	4	7827997	2.67505e+06	22183132	10897358	2.37492e+07	6674144	3.00534e+06	65423992	34662528	8.31702e+06	67038656	0	18668239	1.28234e+07	19401544	1.31418e+07	1.8277e+07	2.08069e+07	1.75663e+07	1.36826e+07	7.4549e+06	0.126027	-0.125737	-0.445765	1.17418e+07	2.7079e+07	2.06464e+07	1.2296e+07	2.45547e+07	1.72145e+07	0.0200323	-0.0424982	-0.0789501	1.83451e+07	1.35957e+07	2.20643e+07	22.4	39.5	38.9	34.2	23.6	-1.35	0.32	-1.1	0.819	1.14
E7F424	Muscular LMNA-interacting protein OS=Danio rerio OX=7955 GN=mlip PE=4 SV=2	mlip	2	884739	3.46665e+06	4.05212e+06	0	2507695	605992	5.83006e+06	12859726	10253883	725437	9.7783e+06	0	5615735	4.01607e+06	4.82726e+06	4.29944e+06	3.52234e+06	3.70821e+06	2.99193e+06	3.6878e+06	876513	-0.15746	0.0199363	-0.626406	5.52578e+06	8.22434e+06	6.21951e+06	1.13195e+06	7.20671e+06	4.42934e+06	-0.688565	-0.0573636	-0.147417	5.14437e+06	4.03476e+06	5.22109e+06	10.6	58.1	21.1	71.5	13.8	-1.53	0.32	-1.56	0.341	1.73
B0S6Z1	DEAH (Asp-Glu-Ala-His) box helicase 9 OS=Danio rerio OX=7955 GN=dhx9 PE=4 SV=1	dhx9	2	0	1.01998e+06	2.93677e+06	0	0	3.40431e+06	0	0	0	0	0	964499	0	712915	1.80372e+06	2.99688e+06	1.37073e+06	2.6928e+06	573106	356154	3.50524e+06	-0.718435	-0.585314	0.114513	332440	2.17875e+06	837648	730082	581669	2.45284e+06	0.341658	-0.573531	0.466607	1.09148e+06	1.26754e+06	1.94146e+06	36.7	119	85.5	82.9	31.3	-1.59	0.32	1.12	0.811	-2.11
A0A0R4IHM4	NADH-cytochrome b5 reductase OS=Danio rerio OX=7955 GN=cyb5r3 PE=1 SV=1	cyb5r3	5	8.32682e+06	8.24623e+06	14730938	3.63234e+07	1.69677e+07	1.10719e+07	2.32818e+07	46306953	5.236e+07	1.29641e+07	4.47677e+07	27661826	3.00986e+07	2.6477e+07	24332185	1.07746e+07	1.15658e+07	1.5574e+07	6.16042e+07	1.57661e+07	1.33893e+07	0.757211	0.134548	-0.0656431	2.55978e+07	2.97793e+07	2.65502e+07	1.94088e+07	3.33629e+07	6.22454e+07	-0.120204	0.0493484	0.37004	2.87255e+07	2.77422e+07	2.92811e+07	20.4	89.8	8.03	57	2.73	2.39	0.319	1.4	0.567	2.16
U3JA30	Actin-binding LIM protein family, member 2 OS=Danio rerio OX=7955 GN=ablim2 PE=4 SV=1	ablim2	13	9.93772e+06	1.21242e+07	7.02507e+06	9.92544e+06	6.99397e+07	6421596	9.90557e+07	2.19767e+08	2.29974e+08	6.01362e+06	1.38401e+08	5.68373e+06	3.86974e+07	4.32313e+07	5.61829e+07	1.77675e+07	1.62894e+07	1.50219e+07	1.89759e+07	2.69984e+07	1.57854e+07	0.0285761	0.219434	0.0215297	9.44507e+07	1.37108e+08	1.16317e+08	1.35327e+07	3.81912e+07	4.33202e+07	-0.843822	-0.555098	-0.428953	5.13372e+07	4.6682e+07	6.29541e+07	8.4	28.1	18.4	50.3	15.6	1.26	0.319	-3.66	0.053	7.09
E7FAD0	Myosin, heavy polypeptide 1.1, skeletal muscle OS=Danio rerio OX=7955 GN=myhz1.1 PE=1 SV=2	myhz1.1	1	1.59289e+07	3.92953e+07	4.10525e+07	1.39189e+07	0	2.60011e+07	2.32495e+06	0	6.48575e+06	0	4413849	46531763	16069748	14779606	31981002	1.74188e+07	4.00633e+07	3.68845e+07	2.23412e+07	4.83891e+06	2.69178e+07	0.108089	-0.917999	-0.136804	2.20551e+06	2.61467e+06	3.90465e+06	2.31873e+07	3.26054e+06	7.30384e+07	1.02174	0.0958725	1.27197	1.45717e+07	1.48576e+07	3.507e+07	39	64.6	30.5	108	54.7	-1.74	0.318	11.4	0.177	-10.8
Q58EM0	HERV-H LTR-associating 2a, tandem duplicate 1 OS=Danio rerio OX=7955 GN=hhla2a.1 PE=1 SV=1	hhla2a.1	13	7.11911e+06	5.49101e+06	1.05775e+07	3.81e+06	2.85609e+08	534269	5.06048e+08	724012556	7.02119e+08	1.49622e+08	5.11298e+08	1.85771e+06	2.35198e+08	2.32351e+08	2.12933e+08	1.25639e+07	1.32014e+07	1.41503e+07	1.12086e+07	1.88732e+08	2.96832e+07	-0.0495709	1.15523	0.321744	4.74928e+08	4.30325e+08	3.87912e+08	2.23353e+08	3.57975e+08	3.73122e+08	-0.327636	-0.0799432	-0.0168827	2.16714e+08	2.35432e+08	2.29192e+08	6	128	10.1	25.9	4.2	5.75	0.317	-1.35	0.177	32.4
A1L1R8	Zgc:158279 OS=Danio rerio OX=7955 GN=cd276 PE=2 SV=1	cd276	1	0	0	0	0	2.31732e+06	0	0	2127917	1.26258e+06	1.77021e+06	4.96847e+06	0	0	0	0	257565	901485	664272	485174	2.64159e+06	1.02151e+06	0.275011	0.466907	0.186895	745264	1.40453e+06	801444	2.47252e+06	3.66166e+06	4.5116e+06	0.520831	0.416148	0.750457	417931	218308	298277	53.6	81.2	37.2	28.9	32.3	2.28	0.317	3.61	0.00865	1.62
Q7ZU62	Zgc:66168 protein (Fragment) OS=Danio rerio OX=7955 GN=rps27a PE=2 SV=1	rps27a	14	4.82962e+08	4.15875e+08	6.48373e+08	3.68196e+08	1.89102e+09	490777407	1.1979e+09	1.92328e+09	1.72999e+09	7.88671e+08	2.36522e+09	4.11626e+08	9.44309e+08	9.59377e+08	1003409293	5.363e+08	4.2875e+08	5.83335e+08	6.49223e+08	1.88002e+09	5.2353e+08	0.0829866	0.641957	-0.0469766	1.11982e+09	1.0933e+09	9.0938e+08	1.37925e+09	1.592e+09	7.22623e+08	0.0904946	0.163204	-0.0998334	8.51161e+08	9.72672e+08	1.13082e+09	15.4	73.7	11	36.8	14.2	1.97	0.317	1.18	0.68	2.02
E7FDL7	Syntrophin, beta 2 OS=Danio rerio OX=7955 GN=sntb2 PE=4 SV=1	sntb2	4	0	0	0	0	11963265	0	1.159e+07	1.88449e+07	2.24841e+07	3.65903e+06	8.89215e+06	0	3.18038e+06	2.91413e+06	1.30145e+06	2.25758e+06	2.20798e+06	2.39262e+06	2.54342e+06	9.28665e+06	2.70683e+06	0.0517759	0.623865	0.0535874	1.53883e+07	1.98575e+07	1.35788e+07	5.52737e+06	7.43785e+06	2.34873e+06	-0.444672	-0.426477	-0.762029	4.38883e+06	3.85339e+06	4.66567e+06	4.18	79.4	19.9	50.4	9.6	2.12	0.316	-3.19	0.0568	7.12
Q6P603	Annexin OS=Danio rerio OX=7955 GN=anxa2a PE=1 SV=1	anxa2a	3	1.42553e+08	1.04824e+08	143310176	2.24242e+08	5.49633e+07	317394511	116681325	129958320	7.67698e+07	8.52879e+07	1.26593e+08	3.30686e+08	1.11849e+08	139232963	149798077	1.59152e+08	1.07366e+08	1.28503e+08	3.85685e+08	9.74209e+07	3.29813e+08	0.384421	-0.0422153	0.409354	1.09737e+08	7.68546e+07	4.35387e+07	1.2937e+08	8.84576e+07	5.38314e+08	0.0714781	0.0610651	1.09216	1.00549e+08	1.41079e+08	1.65806e+08	19.8	56.4	43.1	98.7	24.3	2.06	0.315	3.29	0.225	-1.72
Q1LWN2	Vitellogenin 1 OS=Danio rerio OX=7955 GN=vtg1 PE=1 SV=1	vtg1	32	1.25326e+08	1.04677e+08	4.15871e+07	3.09318e+07	1.97646e+09	7.77524e+07	6.6391e+08	2128887286	2.51471e+09	476836553	1.3024e+09	7.14951e+07	7.96695e+08	7.40285e+08	7.13026e+08	1.48804e+08	1.10545e+08	8.62356e+07	1.68481e+08	1.1387e+09	1.20233e+08	0.0539371	1.01287	0.144338	6.5141e+08	1.24034e+09	1.37492e+09	7.10848e+08	9.15972e+08	5.04314e+08	0.0379222	-0.131658	-0.435576	7.50579e+08	7.47214e+08	7.99145e+08	27.4	121	35.3	29	3.8	4.13	0.314	-1.53	0.241	9.45
E7F5R7	Myosin Ic, paralog b OS=Danio rerio OX=7955 GN=myo1cb PE=1 SV=2	myo1cb	4	0	5.00897e+06	0	0	9.89208e+06	577399	1.40258e+06	1.53202e+06	9.13251e+06	0	4.53929e+06	0	2.23038e+06	0	908033	2.75936e+06	1.55747e+06	2.59478e+06	2.70838e+06	1.12924e+07	2.5526e+06	-0.00809905	0.860368	-0.00711677	2.69594e+06	1.63579e+06	6.42851e+06	1.94818e+06	4.46453e+06	1.39624e+06	-0.141082	0.436049	-0.66315	3.29307e+06	1.6219e+06	2.51618e+06	28.3	90.6	70.2	62.8	33.8	2.4	0.314	-1.38	0.622	1.56
A8WIP5	Host cell factor C1b OS=Danio rerio OX=7955 GN=hcfc1b PE=1 SV=1	hcfc1b	14	2.6384e+08	3.39282e+08	3.21624e+08	188564569	7.42042e+06	2.89782e+08	1.02799e+06	0	0	4.20578e+06	3.8203e+06	2.09377e+08	1.43663e+08	1.09185e+08	8.5483e+07	2.84285e+08	3.47324e+08	2.66164e+08	3.09521e+08	1.63748e+08	2.45093e+08	0.036935	-0.32656	-0.0358198	5.33062e+06	7.90421e+06	6.41186e+06	2.01928e+07	3.17712e+07	2.03933e+08	0.57842	0.604175	1.5025	1.3292e+08	1.02859e+08	9.54896e+07	14.2	30.5	19.7	121	18	-1.25	0.313	13	0.0968	-45.7
A0A0R4IQ22	Si:ch1073-110a20.7 OS=Danio rerio OX=7955 GN=si:ch1073-110a20.7 PE=4 SV=1	si:ch1073-110a20.7	1	2.6351e+06	3.16014e+06	4.97149e+06	12232620	0	1.981e+06	4.15716e+06	2.22865e+06	2.99171e+06	830285	2.08544e+06	4.72603e+06	6445903	1480014	2.95859e+06	2.85375e+06	3.21292e+06	4.5247e+06	1.95618e+07	2.72381e+07	2.04016e+06	0.835994	0.928276	-0.345926	3.93535e+06	1.46907e+06	1.84677e+06	1.13948e+06	1.56356e+06	6.99737e+06	-0.538276	0.0270719	0.578523	5.87657e+06	1.48673e+06	3.2034e+06	24.9	79.3	55	101	62.8	4.61	0.312	1.34	0.94	-1.46
A0A0R4IBJ3	Adducin 3 (gamma) a OS=Danio rerio OX=7955 GN=add3a PE=1 SV=2	add3a	31	5.55231e+07	5.90732e+07	6.70142e+08	1.32203e+08	5.84295e+08	7.23802e+08	1.15744e+09	2110083552	1.70734e+09	3.53022e+08	1.21918e+09	1.59104e+08	8.00298e+08	7.26201e+08	6.82357e+08	7.6156e+07	9.83921e+07	6.09326e+08	2.35832e+08	3.74046e+08	7.66128e+08	0.490899	0.579965	0.0994514	1.09616e+09	1.2501e+09	9.4895e+08	5.32644e+08	7.71719e+08	7.20677e+08	-0.313436	-0.209484	-0.119503	7.36139e+08	7.3786e+08	7.62978e+08	115	60	13.7	18.7	2.01	1.76	0.311	-1.63	0.0287	4.2
F1RDE2	NCK-associated protein 5-like OS=Danio rerio OX=7955 GN=nckap5l PE=4 SV=2	nckap5l	13	5.25775e+07	4.38369e+07	1.37278e+07	24700715	78616608	2.10327e+07	3.96487e+07	6.24517e+07	7.63484e+07	2.61978e+07	4.4511e+07	2.50295e+07	5.62373e+07	1.97142e+07	3.6146e+07	5.4681e+07	4.80982e+07	6.348e+07	4.16874e+07	5.93822e+07	2.764e+07	-0.117831	0.0915278	-0.361098	3.96645e+07	4.37491e+07	3.98041e+07	3.34673e+07	3.37921e+07	5.24128e+07	-0.0737805	-0.112155	0.119509	3.29717e+07	2.3404e+07	4.35883e+07	13.9	37.1	5.65	27.2	30.3	-1.29	0.31	-1.03	0.766	-1.35
Q6A162	Keratin, type I cytoskeletal 40 OS=Homo sapiens GN=KRT40 PE=1 SV=2	KRT40	2	3.68962e+06	1.97421e+06	9.29985e+06	2703808	983310	1.34733e+07	8.11604e+06	0	0	533086081	0	2.31049e+06	3.38806e+07	4.30405e+07	3.78446e+07	3.98813e+06	2.4305e+06	8.85638e+06	4.24456e+06	1.97348e+06	2.05038e+06	0.0270633	-0.0904635	-0.635423	2.75146e+06	918658	701097	2.87685e+07	1.56115e+07	4.35326e+06	1.01935	1.23029	0.793036	3.06255e+07	4.32788e+07	4.14719e+07	65.8	46.8	77.3	75.2	17.8	-1.85	0.31	11.1	0.0318	-3.49
Q7ZYY0	Acyl-CoA dehydrogenase family, member 8 OS=Danio rerio OX=7955 GN=acad8 PE=1 SV=1	acad8	1	0	0	0	0	0	0	806733	1.77183e+06	5.84759e+06	0	0	0	1.04805e+06	0	0	629682	875693	172738	450990	154294	157090	-0.144955	-0.754003	-0.0412388	768208	1.17562e+06	3.53227e+06	205777	446246	828963	-0.572083	-0.420691	-0.629519	965774	856265	488983	63.8	67.1	81.7	63.7	32.4	-2.2	0.308	-3.7	0.111	3.26
E9QC55	Zinc finger FYVE domain-containing protein OS=Danio rerio OX=7955 GN=zfyve16 PE=1 SV=1	zfyve16	3	264396491	3.42278e+08	1.47297e+07	5.19235e+08	2.48736e+08	3.72472e+08	3.48998e+08	3.78819e+08	2.50648e+08	2.76107e+08	2.61132e+08	6.0734e+08	3.16939e+08	3.80955e+08	4.77886e+08	3.06723e+08	3.49769e+08	1.33917e+07	9.23742e+08	3.04055e+08	3.87638e+08	0.478804	-0.0608301	1.46159	3.25198e+08	2.16472e+08	1.34461e+08	4.35315e+08	1.78291e+08	1.01795e+09	0.126656	-0.0842724	0.87913	2.82501e+08	3.83349e+08	5.31494e+08	82	62.4	42.5	79.1	31.4	2.41	0.307	2.41	0.3	1.01
E7EZP2	Mitogen-activated protein kinase-associated protein 1 OS=Danio rerio OX=7955 GN=mapkap1 PE=1 SV=2	mapkap1	3	9.48747e+06	5702346	1.3469e+06	0	1.05845e+07	6.04569e+06	15740433	18731659	10358085	4.37842e+06	7785935	1.06414e+07	1.09662e+07	12836960	10746273	1.18017e+07	6.26842e+06	2.28667e+06	1.57742e+07	1.21111e+07	6.50949e+06	0.126002	0.286024	0.454343	1.55343e+07	1.19872e+07	7.13329e+06	6.26059e+06	6.84371e+06	7.65426e+06	-0.394677	-0.243427	0.0306129	1.66593e+07	1.28997e+07	1.16479e+07	70.4	40.7	36.5	10.1	19	1.69	0.307	-1.67	0.172	1.7
Q6P3H9	Solute carrier family 3 (amino acid transporter heavy chain), member 2b OS=Danio rerio OX=7955 GN=slc3a2b PE=1 SV=1	slc3a2b	10	40895648	4.93193e+07	3.60829e+07	3.18369e+07	92855212	20805260	50916549	7.70895e+07	55128484	2.588e+07	1.11408e+08	20187314	4.6738e+07	3.71058e+07	3.42037e+07	5.06878e+07	5.39717e+07	3.74487e+07	5.56058e+07	1.00099e+07	2.45227e+07	0.0402166	-0.731737	-0.183868	5.18435e+07	4.88269e+07	3.77886e+07	2.61941e+07	6.3824e+07	5.13859e+07	-0.296491	0.116325	0.133483	3.2577e+07	4.16655e+07	4.01676e+07	18.5	77.5	16	40.7	12.8	-1.58	0.306	1.02	0.909	-1.03
E9QGE0	Calpastatin (Fragment) OS=Danio rerio OX=7955 GN=cast PE=1 SV=1	cast	1	4.94534e+07	38298081	5.83905e+06	7.58894e+06	2.87665e+06	12581903	4328818	6.69329e+06	8.75731e+06	3.10047e+06	0	0	0	7727764	4044721	5.44102e+07	3.90455e+07	5.30908e+06	1.19703e+07	3.28554e+06	1.30063e+07	-0.657574	-1.07496	0.389135	4.09726e+06	4.27587e+06	5.22124e+06	4.3873e+06	504590	421181	0.029704	-0.928086	-1.0933	5.95336e+06	7.76692e+06	4.38673e+06	76.3	56.7	13.3	128	28	-3.49	0.306	-2.56	0.178	-7.27
Q5XJB2	Tnnc1 protein OS=Danio rerio OX=7955 GN=tnnc1a PE=2 SV=1	tnnc1a	1	1.65116e+06	1.55658e+06	3615777	2.29415e+06	0	1.85703e+06	0	2792766	0	877035	3.95348e+06	1.54708e+06	3.44338e+06	0	0	1.78366e+06	1.58134e+06	3.29723e+06	3.49623e+06	5.14995e+06	1.91223e+06	0.292287	0.512779	-0.23661	203282	1.82912e+06	605950	1.20517e+06	2.92684e+06	2.22622e+06	0.77295	0.204156	0.565131	3.15087e+06	850425	975404	42.2	46	96.3	40.9	78	1.58	0.304	2.41	0.194	-2.53
F1Q4P0	Zmp:0000001081 OS=Danio rerio OX=7955 GN=zmp:0000001081 PE=4 SV=2	zmp:0000001081	4	1.69735e+11	1.39523e+11	3.71131e+10	5.23688e+10	9.05482e+09	3.3912e+10	34163871563	3.48114e+10	2.99104e+10	2.0413e+10	3.60527e+10	4.94762e+10	3.47945e+10	3.4275e+10	3.36604e+10	1.94587e+11	1.43451e+11	3.19909e+10	1.06286e+11	1.10569e+10	3.56407e+10	-0.262637	-1.11307	0.0469197	3.13112e+10	1.74385e+10	1.37302e+10	3.54038e+10	2.2293e+10	9.27003e+10	0.0533495	0.106661	0.829406	3.01683e+10	3.45403e+10	3.82945e+10	67.4	96.9	44.5	74.7	11.8	-2.42	0.302	2.41	0.21	-5.92
E7FEY5	Non-specific serine/threonine protein kinase OS=Danio rerio OX=7955 GN=cdc42bpab PE=3 SV=1	cdc42bpab	3	0	0	91603.9	0	4.33669e+06	0	2949834	3409496	2.83634e+06	700159	23160.1	0	314613	272678	318190	869881	943589	1.19704e+06	996967	4.94085e+06	1.46449e+06	0.059221	0.719019	0.0875767	3.76804e+06	2.49968e+06	2.83679e+06	2.17945e+06	811204	1.5335e+06	-0.237769	-0.488754	-0.267142	1.12061e+06	1.70226e+06	1.67707e+06	17.1	87.3	21.6	45.4	21.9	2.46	0.301	-2.01	0.103	3.02
E7F0N6	Amyloid beta (A4) precursor protein-binding, family B, member 1 (Fe65) OS=Danio rerio OX=7955 GN=apbb1 PE=4 SV=1	apbb1	10	1.13634e+07	2.32425e+07	1.38817e+07	1.40176e+07	1.27443e+07	1.35617e+07	4.69713e+07	65159454	7.40642e+07	8.82455e+06	3.69909e+07	677213	2.48399e+07	22972336	3.51694e+07	1.47996e+07	1.89635e+07	1.90497e+07	3.1568e+07	2.5124e+07	1.57536e+07	0.328997	0.12217	-0.082509	4.46337e+07	4.4264e+07	4.51353e+07	1.38264e+07	2.76006e+07	1.32032e+07	-0.508954	-0.205132	-0.533839	2.66618e+07	2.32849e+07	4.11424e+07	13.8	32.9	0.979	44.7	31.2	1.37	0.301	-2.45	0.0567	2.54
B3DIT9	Si:rp71-57j15.4 OS=Danio rerio OX=7955 GN=pdk4 PE=2 SV=1	pdk4	4	7.26786e+06	2630659	1.83879e+06	0	9.482e+06	1.27912e+06	1.55629e+07	3.1926e+07	4.52685e+07	753201	1.71782e+07	1.96859e+06	9.73852e+06	8.4517e+06	1.53034e+07	4.44768e+06	3.99448e+06	3.09149e+06	1.89418e+06	4.59807e+06	1.77094e+06	-0.370711	0.0611156	-0.241965	1.47317e+07	2.0233e+07	2.66722e+07	4.64837e+06	4.70798e+06	3.6873e+06	-0.500953	-0.633225	-0.859351	1.48885e+07	1.53959e+07	1.65991e+07	18	58	29.1	13.2	5.62	-1.4	0.301	-4.73	0.00492	5.34
Q6PC90	40S ribosomal protein S12 OS=Danio rerio OX=7955 GN=rps12 PE=1 SV=1	rps12	1	4.80137e+07	52018542	2.69486e+06	1216583	13363912	2.83124e+06	4.43697e+06	12860250	18189010	4.34881e+06	11928168	1296988	7.71222e+06	5.44638e+06	4.86328e+06	5.28177e+07	5.30516e+07	2.46187e+06	1.82052e+06	1.54744e+07	2.91789e+06	-1.46258	-0.535085	0.0738049	4.19925e+06	8.06395e+06	1.05911e+07	6.2023e+06	8.63972e+06	1.85795e+06	0.169381	0.0299518	-0.755908	7.02361e+06	5.47337e+06	5.27969e+06	80.7	113	42.3	61.7	16.1	-5.36	0.301	-1.37	0.484	-4.74
A0A0R4IW64	Ras suppressor protein 1 OS=Danio rerio OX=7955 GN=rsu1 PE=1 SV=1	rsu1	8	2.37642e+06	1.72545e+06	2.3974e+06	970028	1.26016e+08	4.28496e+06	7.26713e+07	1.0326e+08	1.01175e+08	6.12894e+07	123314100	398760	4.47012e+07	4.19866e+07	4.49109e+07	4.93411e+06	7.03895e+06	5.38429e+06	7.7919e+06	5.28266e+07	6.95521e+06	0.198435	0.875345	0.111182	6.88043e+07	6.55855e+07	5.90381e+07	9.05675e+07	8.85132e+07	2.61942e+08	0.119357	0.1302	0.647072	4.29446e+07	4.45503e+07	5.0316e+07	19.2	117	7.72	67.7	8.44	3.89	0.3	2.28	0.193	11.1
A0A140LH04	Microtubule-associated tumor suppressor 1 homolog A OS=Danio rerio OX=7955 GN=mtus1a PE=4 SV=1	mtus1a	2	0	0	0	0	5.6614e+06	483042	2.26785e+06	3.52146e+06	4062057	1.76775e+06	5.57029e+06	0	2.91475e+06	2.55992e+06	0	1.13638e+06	771665	882679	4.06464e+06	6.47313e+06	604781	0.553499	0.923685	-0.164205	2.40307e+06	2.61755e+06	2.75095e+06	2.6234e+06	4.13646e+06	5.5214e+06	0.038099	0.198734	0.302566	2.67872e+06	2.57154e+06	2.46361e+06	20.1	79.4	6.78	35.4	4.18	3.99	0.298	1.58	0.193	2.78
P19012	Keratin, type I cytoskeletal 15 OS=Homo sapiens GN=KRT15 PE=1 SV=3	KRT15	4	5360864	22550516	24794539	8.90928e+06	0	1.08598e+06	0	105898387	7.92338e+06	0	1.43749e+06	0	1.55436e+07	11960501	12821216	7.10636e+06	1.88602e+07	1.36942e+07	1.51365e+07	4.9818e+06	3.59438e+06	0.328377	-0.578161	-0.580912	1.25902e+07	2.4875e+07	7.24596e+06	2.44766e+06	1.52197e+06	2.73528e+06	-0.711282	-1.21336	-0.423094	1.5077e+07	1.56397e+07	1.48291e+07	44.6	79.7	60.7	28.4	2.74	-1.67	0.298	-6.67	0.021	1.13
Q6DRM4	Actopaxin OS=Danio rerio OX=7955 GN=parvaa PE=1 SV=1	parvaa	6	0	1.59002e+06	8447430	2.09155e+07	3.93177e+07	3.91276e+06	3.36989e+07	2.33228e+07	2.4693e+07	23910910	3.57177e+07	6794919	1.39973e+07	1.46469e+07	9.57678e+06	7.05645e+06	4.40189e+06	9.91156e+06	2.99499e+07	1.7262e+07	5.21994e+06	0.627809	0.593453	-0.278476	3.57681e+07	2.16033e+07	1.54955e+07	2.4968e+07	2.78492e+07	2.09831e+07	-0.156112	0.110294	0.131665	1.45135e+07	1.64792e+07	1.23173e+07	38.7	70.8	42.8	14	14.4	2.45	0.297	1.01	0.817	3.41
Q66I11	5'-nucleotidase, cytosolic II,-like 1 OS=Danio rerio OX=7955 GN=nt5c2l1 PE=1 SV=1	nt5c2l1	1	0	0	0	0	0	0	0	0	3.44585e+06	1.07318e+06	0	0	2.65332e+06	0	0	273693	567822	319627	343977	583907	1.27687e+06	0.0992658	0.0121315	0.601503	189649	125070	2.1174e+06	1.48163e+06	211902	218915	0.89279	0.228982	-0.985529	2.43166e+06	681288	274252	40.9	65.9	140	115	102	1.9	0.297	-1.27	0.929	2.09
F1Q7P7	Pdgfa-associated protein 1b OS=Danio rerio OX=7955 GN=pdap1b PE=1 SV=1	pdap1b	11	4.33439e+07	4.37897e+07	2.94706e+07	1.59266e+07	6.39036e+07	1.56736e+07	5.7838e+07	138877250	8.5723e+07	7.78683e+08	1.11057e+08	1.39878e+07	1.37261e+08	1.1231e+08	124605138	5.00119e+07	4.82282e+07	5.43114e+07	2.92956e+07	5.87081e+07	1.89729e+07	-0.232271	0.0853972	-0.456757	6.44813e+07	7.96463e+07	5.2217e+07	1.24967e+09	7.18515e+07	2.47317e+07	1.28736	-0.0447301	-0.324559	1.27529e+08	1.1477e+08	1.39063e+08	6.15	57.8	21	155	9.56	-1.43	0.294	6.86	0.609	1.29
Q5RGR6	Wiskott-Aldrich syndrome-like b OS=Danio rerio OX=7955 GN=waslb PE=1 SV=1	waslb	1	0	0	2.3785e+06	1.11256e+06	3318261	1.19908e+06	4906374	5556727	7.34697e+06	2.0184e+06	6.31391e+06	970114	5180617	3217546	2.27036e+06	945573	248760	2.17452e+06	1.66058e+06	3.79476e+06	1.23363e+06	0.244565	1.1834	-0.246178	4.64182e+06	3.56869e+06	4.40533e+06	2.8278e+06	4.6312e+06	1.37943e+06	-0.215241	0.113185	-0.504278	4.72913e+06	3.23295e+06	2.45476e+06	86.8	61.5	13.4	55.3	33.3	1.99	0.293	-1.43	0.316	3.74
A0A0H2UJY3	DEAD (Asp-Glu-Ala-Asp) box helicase 3a OS=Danio rerio OX=7955 GN=ddx3a PE=1 SV=1	ddx3a	3	1.1529e+06	6.11182e+06	12915021	3.80535e+06	7.51673e+06	6.08672e+06	5.08492e+06	1.06042e+07	1.37223e+07	586033	1.29226e+07	3.74493e+06	5.80413e+06	8.3293e+06	7.0626e+06	7.0244e+06	6.57382e+06	1.17627e+07	8.45459e+06	1.64519e+07	1.03912e+07	0.0804833	0.398399	-0.0538434	6.15218e+06	6.87785e+06	8.3422e+06	4.44032e+06	9.52416e+06	6.12034e+06	-0.141615	0.141374	-0.134505	8.00244e+06	8.36934e+06	8.46285e+06	34	35.5	15.7	38.7	2.94	1.39	0.293	-1.06	0.698	-1.19
Q0PWB9	PDZ and LIM domain 4 OS=Danio rerio OX=7955 GN=pdlim4 PE=1 SV=1	pdlim4	1	3.76381e+06	3371220	2.40862e+06	3.01246e+06	0	0	0	1.43029e+06	0	777963	0	1954835	3.00533e+06	2.67753e+06	1.42595e+06	4.08395e+06	3.42778e+06	2.20189e+06	4.62704e+06	156047	673188	0.0542228	-1.34176	-0.514658	430507	954813	271355	1.06606e+06	1.90599e+06	2.82982e+06	0.393802	0.300202	1.01822	2.75225e+06	2.69019e+06	1.53794e+06	29.5	134	64.8	45.6	29.4	-1.78	0.293	3.5	0.0508	-5.86
M9MMA4	Immunoglobulin superfamily, member 3 OS=Danio rerio OX=7955 GN=igsf3 PE=1 SV=1	igsf3	15	2.21242e+07	5.00152e+07	7.23136e+08	9.07198e+08	1.8696e+08	5.78072e+08	6.8417e+08	7.21767e+08	6.76569e+08	4.04905e+08	8.1702e+08	8.43769e+08	7.46734e+08	5.8656e+08	5.53713e+08	1.55441e+08	5.70092e+07	6.495e+08	1.67272e+09	1.84388e+08	5.97688e+08	1.03186	0.509787	-0.0361046	6.38254e+08	4.19798e+08	3.60846e+08	6.40182e+08	5.45742e+08	1.46534e+09	0.00130984	0.113947	0.608615	6.66986e+08	5.9409e+08	6.10741e+08	111	93.9	30.9	57.2	6.12	2.85	0.292	1.87	0.207	1.65
F1R2S5	Vitellogenin 5 (Fragment) OS=Danio rerio OX=7955 GN=vtg5 PE=1 SV=1	vtg5	84	7.8274e+08	8.00207e+08	7.33171e+08	6.6442e+08	4.95638e+09	6.9897e+08	2.49718e+09	6.86182e+09	7.82038e+09	1.49746e+09	4.4237e+09	6.72429e+08	2.97144e+09	2592851039	2.39416e+09	8.75457e+08	8.24201e+08	8.1579e+08	1.29323e+09	4.431e+09	8.48497e+08	0.169441	0.730469	0.017072	2.3834e+09	4.02989e+09	4.24693e+09	2.22272e+09	3.06704e+09	1.66507e+09	-0.0303109	-0.118574	-0.406642	2.67665e+09	2.60989e+09	2.66161e+09	3.85	89.1	28.7	30.4	1.32	2.61	0.292	-1.53	0.17	4.24
Q9DEU2	Sodium/potassium-transporting ATPase subunit alpha OS=Danio rerio OX=7955 GN=atp1a3b PE=1 SV=1	atp1a3b	4	753504	626506	2.18481e+06	0	1735028	0	7.40521e+06	1.29487e+07	15402878	0	4073890	0	3.54233e+06	2.86941e+06	1.44273e+06	2.38291e+06	1.5231e+06	2.63043e+06	1.9424e+06	3.61924e+06	3.61818e+06	-0.0887692	0.375889	0.138463	7.62151e+06	8.63818e+06	5.84954e+06	801506	4.87864e+06	2.40924e+06	-0.978134	-0.248124	-0.385241	3.92343e+06	4.13668e+06	4.97675e+06	26.7	31.6	19.1	76.2	12.8	1.4	0.291	-2.73	0.137	3.38
E7F737	Dishevelled segment polarity protein 3b OS=Danio rerio OX=7955 GN=dvl3b PE=4 SV=1	dvl3b	4	4.7955e+06	1.00965e+07	5.5834e+06	6.10126e+06	3.102e+06	3.35345e+06	4.09448e+06	5921401	8.14823e+06	635205	1497974	2.57627e+06	5.83818e+06	2.44236e+06	5.14411e+06	9.99199e+06	1.02637e+07	5.4002e+06	9.28146e+06	3.7402e+06	4.38334e+06	-0.032036	-0.438408	-0.0906047	4.47815e+06	4.97757e+06	5.21194e+06	3.61116e+06	2.66805e+06	4.33454e+06	-0.0934525	-0.270824	-0.0800568	5.81668e+06	7.0247e+06	6.23665e+06	32	52.2	7.67	23.6	9.64	-1.47	0.291	-1.38	0.127	-1.75
F1R0Q1	Solute carrier family 2 (facilitated glucose transporter), member 1b OS=Danio rerio OX=7955 GN=slc2a1b PE=3 SV=2	slc2a1b	3	1.06017e+06	2.60923e+06	699065	2774009	2.36834e+07	1.52995e+06	24065860	49742053	5.3696e+07	8.1633e+06	24079278	839509	18947876	9.25344e+06	5.76935e+06	2.36046e+06	3.50037e+06	1.44842e+06	5.06296e+06	5.62452e+06	1.97655e+06	0.331407	0.205971	0.135012	2.27252e+07	3.09496e+07	3.12499e+07	1.19577e+07	1.79531e+07	1.13366e+07	-0.278858	-0.236517	-0.440366	1.72519e+07	1.01228e+07	8.2118e+06	42.2	46.5	17.1	26.6	40.2	1.73	0.29	-2.06	0.018	11.6
F8W432	AMP deaminase OS=Danio rerio OX=7955 GN=ampd3a PE=1 SV=1	ampd3a	1	3.6103e+06	8.62274e+06	2767203	0	4.84483e+06	6.25017e+06	1.77956e+06	2438593	1.07915e+07	4.33187e+06	4.29533e+06	5.52379e+06	0	2.81146e+06	4733188	3.9165e+06	8.77651e+06	2.52754e+06	4.19188e+07	5.55931e+06	6.45183e+06	1.02951	-0.198301	0.406985	1.68976e+06	1.60334e+06	6.39071e+06	6.17759e+06	3.1747e+06	8.21118e+06	0.562993	0.296676	0.108856	4.77319e+06	2.82479e+06	5.13772e+06	64.7	115	84.9	43.3	29.3	3.54	0.288	1.81	0.248	-1.57
Q7ZVI6	Tubulin alpha chain OS=Danio rerio OX=7955 GN=tuba8l4 PE=2 SV=1	tuba8l4	2	2.77334e+07	26129964	3.70718e+07	2.50853e+07	151934436	3.39242e+07	75810336	120832717	1.70089e+08	7.20083e+07	133672922	3.36213e+07	7.64128e+07	70790446	71045817	3.031e+07	2.66085e+07	3.34301e+07	4.01932e+07	1.78765e+08	3.50935e+07	0.122566	0.827261	0.0210894	7.11955e+07	7.24714e+07	9.41553e+07	1.07956e+08	9.35378e+07	5.14437e+07	0.180796	0.11082	-0.262513	6.89208e+07	7.11843e+07	7.79639e+07	11.3	96.3	16.3	34.8	6.47	2.81	0.288	1.06	0.934	2.63
E7F475	Eukaryotic translation initiation factor 3 subunit C OS=Danio rerio OX=7955 GN=eif3c PE=1 SV=1	eif3c	10	6.24421e+07	9.35157e+07	1.19474e+08	1.11385e+08	7.19853e+07	8.36241e+07	1.15951e+08	7.8832e+07	8.84091e+07	32913342	9.77486e+07	6.50743e+07	5.30129e+07	6.91616e+07	5.34956e+07	6.93698e+07	9.59305e+07	9.70356e+07	1.9056e+08	1.07183e+08	8.73959e+07	0.438861	0.0481676	-0.0454397	1.092e+08	8.07005e+07	5.24316e+07	4.79183e+07	5.77841e+07	1.01859e+08	-0.357723	-0.145068	0.288405	5.03257e+07	7.08855e+07	6.48026e+07	17.9	42.6	35.1	41.5	17	1.47	0.285	-1.17	0.625	-1.08
A0JMN2	Zgc:154046 OS=Danio rerio OX=7955 GN=zgc:154046 PE=1 SV=1	zgc:154046	1	3.34467e+06	0	0	0	0	0	839256	0	6.59101e+06	836457	0	1.51636e+06	0	3.25178e+06	0	3.62685e+06	868809	970150	363895	981162	1.01436e+06	-0.998555	0.0528164	0.0193513	799064	2.17704e+06	3.96595e+06	1.14815e+06	1.86784e+06	2.1809e+06	0.157417	-0.0665263	-0.259712	541566	3.26736e+06	224115	85.8	46.6	68.6	30.6	124	-2.32	0.285	-1.34	0.816	1.27
E9QCG7	U2 snRNP-associated SURP domain-containing OS=Danio rerio OX=7955 GN=u2surp PE=1 SV=2	u2surp	1	865955	2.69431e+06	2508581	1.85566e+06	0	2.2651e+06	0	0	0	0	0	2.77889e+06	633230	703122	951945	932197	2.73883e+06	2.29269e+06	2.81079e+06	3.88464e+06	2.33337e+06	0.47932	0.151787	0.00763798	812239	749226	509648	829708	305431	4.05902e+06	0.00924186	-0.389699	0.901151	585255	706145	1.0245e+06	47.3	26.4	23.1	117	29.4	1.51	0.279	2.51	0.651	-2.88
Q7SYB8	Glycogen [starch] synthase OS=Danio rerio OX=7955 GN=gys1 PE=1 SV=1	gys1	3	6.15937e+06	1.3667e+07	7.19806e+06	0	5.88702e+06	5.86367e+06	2099584	8.09625e+06	1.8168e+07	904849	5666452	0	3.32367e+06	0	5.14505e+06	7.07422e+06	9.16409e+06	6.76741e+06	2.54506e+06	6.98648e+06	6.1292e+06	-0.443981	-0.117831	-0.0430186	7.34577e+06	6.28686e+06	1.09594e+07	2.25976e+06	4.48855e+06	3.82934e+06	-0.511975	-0.146328	-0.456664	4.20632e+06	3.30214e+06	6.55694e+06	17	45.1	29.9	32.5	35.8	-1.47	0.278	-2.32	0.0344	1.07
Q4V9I4	Si:dkey-276i5.1 protein (Fragment) OS=Danio rerio OX=7955 GN=gars PE=2 SV=1	gars	6	264034208	835731	769991	508448	1.59264e+07	1875811	7905734	1.74242e+07	2.0929e+07	7.39192e+06	5.41861e+06	0	6.06474e+06	3.45543e+06	8.27873e+06	2.68121e+06	3.89695e+06	2.80172e+06	5.82477e+06	1.81936e+07	2.90939e+06	0.336948	0.669194	0.0163777	8.00104e+06	1.17148e+07	1.28061e+07	1.04554e+07	4.53451e+06	7.17793e+06	0.116194	-0.412203	-0.251418	6.92576e+06	6.15278e+06	9.47252e+06	21.4	90.4	23.2	40.1	23.1	2.87	0.277	-1.47	0.225	3.47
A2CE51	Eukaryotic translation elongation factor 2,-like 2 OS=Danio rerio OX=7955 GN=eef2l2 PE=1 SV=1	eef2l2	1	2.92511e+06	3.07491e+06	0	1.80988e+06	8291984	0	5.21256e+06	6.09423e+06	9.63455e+06	2.50277e+06	5237965	2.75204e+06	4.94771e+06	4.32934e+06	3.74224e+06	3.16961e+06	3.12618e+06	3.11676e+06	2.73947e+06	9.56063e+06	5.96029e+06	-0.0633389	0.485473	0.281564	4.93043e+06	3.90359e+06	5.72655e+06	3.52395e+06	3.85623e+06	4.0188e+06	-0.145854	-0.00530149	-0.153796	4.51775e+06	4.35047e+06	4.05698e+06	0.898	56.1	18.8	6.64	5.41	1.94	0.276	-1.28	0.161	1.55
Q6NYR4	Heat shock cognate 71 kDa protein OS=Danio rerio OX=7955 GN=hspa8 PE=1 SV=1	hspa8	14	7.35233e+07	7.45335e+07	1.9735e+08	5.58677e+07	93022538	1.84985e+08	4.62125e+07	1.77198e+08	1.78759e+08	4.95854e+07	2.42789e+08	1.08328e+08	1.1514e+08	1.28416e+08	1.12719e+08	7.32471e+07	7.8014e+07	1.60634e+08	1.47429e+08	1.13129e+08	1.68981e+08	0.303792	0.1614	0.0220012	7.87977e+07	1.0295e+08	1.04008e+08	8.27944e+07	1.50621e+08	2.13906e+08	0.0214874	0.165256	0.313155	1.0881e+08	1.30435e+08	1.34551e+08	47.3	19.7	15	44	11.1	1.38	0.276	1.57	0.299	-1.09
Q90Z10	60S ribosomal protein L13 OS=Danio rerio OX=7955 GN=rpl13 PE=2 SV=3	rpl13	5	2.87825e+06	6.34522e+06	4.60843e+06	4371406	62296543	4803370	2.94733e+07	5.37294e+07	86059335	37599378	52329739	1.19529e+07	2.29252e+07	14064025	1.15694e+07	4.68969e+06	7.09594e+06	6.14798e+06	7.56702e+06	1.83915e+07	6.34567e+06	0.207781	0.413607	0.0137449	3.30225e+07	3.37882e+07	5.01663e+07	5.43637e+07	4.1352e+07	3.03001e+07	0.216499	0.0877308	-0.218968	2.1617e+07	1.49891e+07	1.76166e+07	20.3	61.6	24.8	28.7	18.5	1.8	0.274	1.08	0.778	6.52
E7EXT3	Alpha-1,4 glucan phosphorylase OS=Danio rerio OX=7955 GN=pygmb PE=1 SV=1	pygmb	30	9.09069e+08	8.37795e+08	3.83925e+08	2.76052e+08	4.42883e+08	1.82036e+08	6.147e+08	1.01221e+09	1.32768e+09	1.95372e+08	4.30223e+08	2.44785e+08	5.26284e+08	4.32482e+08	4.26199e+08	1.0291e+09	8.28107e+08	3.57478e+08	5.84061e+08	4.57017e+08	1.97091e+08	-0.245998	-0.258154	-0.258583	5.85047e+08	6.13925e+08	7.37509e+08	2.89404e+08	3.14849e+08	5.18164e+08	-0.305686	-0.290013	-0.1533	5.16543e+08	4.36944e+08	4.64797e+08	46.7	47.8	12.5	33.5	8.54	-1.79	0.273	-1.73	0.072	-1.14
A7MBR5	Nop58 protein OS=Danio rerio OX=7955 GN=nop58 PE=2 SV=1	nop58	2	0	0	0	0	2.41189e+06	0	0	0	3.65665e+06	0	814319	0	0	0	0	1.21379e+06	717594	517897	803451	2.86227e+06	1.15078e+06	-0.179186	0.600832	0.346749	1.2667e+06	337326	2.28744e+06	1.28542e+06	880340	522759	0.00637063	0.416601	-0.641049	608506	1.08191e+06	953509	43.9	68.6	75.2	42.6	27.8	1.97	0.272	-1.45	0.807	1.59
F1Q8Z3	Phospholipid-transporting ATPase (Fragment) OS=Danio rerio OX=7955 GN=atp8b5a PE=3 SV=1	atp8b5a	1	0	0	0	0	8144239	0	0	4843745	2708629	0	4799963	0	1.43504e+06	0	0	626692	200121	719510	310298	227423	208385	-0.305275	0.0555418	-0.53817	4.73792e+06	3.12299e+06	1.67741e+06	110862	3.53989e+06	284798	-1.63081	0.0544182	-0.770102	1.31994e+06	812563	838587	53.7	21.8	48.2	147	28.8	-2.07	0.271	-2.42	0.218	6.17
E7F9M6	ATP-dependent 6-phosphofructokinase OS=Danio rerio OX=7955 GN=pfkla PE=1 SV=1	pfkla	3	1.69345e+06	0	860660	0	7284268	1.33044e+06	710396	1.35609e+07	1.45632e+07	1.30244e+06	3.19261e+06	0	656030	0	558765	2.22175e+06	3.08105e+06	1.73161e+06	6.07453e+06	3.55393e+06	2.16277e+06	0.436818	0.0620095	0.0965585	6.18075e+06	8.70203e+06	8.77329e+06	2.58633e+06	2.79782e+06	2.3544e+06	-0.378358	-0.492801	-0.571282	1.06134e+06	2.24494e+06	1.46305e+06	29.1	50.4	18.7	8.6	37.9	1.68	0.27	-3.06	0.00446	3.36
A0A0G2KZU0	Uncharacterized protein OS=Danio rerio OX=7955 GN=ptgfrn PE=1 SV=1	ptgfrn	15	2.68736e+07	3.79465e+07	1.52814e+07	1.45435e+07	2.44779e+08	15543342	4.2703e+08	7.63908e+08	6.43542e+08	2.13181e+08	5.67938e+08	2.01182e+07	2.70324e+08	2.52854e+08	2.51403e+08	3.4296e+07	3.91946e+07	2.10996e+07	2.72658e+07	9.35233e+07	5.71843e+07	-0.0996243	0.377693	0.433002	4.01044e+08	4.53927e+08	3.56715e+08	3.1713e+08	3.98631e+08	2.33298e+08	-0.101955	-0.0564152	-0.18441	2.44634e+08	2.54928e+08	2.76774e+08	29.7	55.9	12	26.1	6.34	1.88	0.269	-1.28	0.227	12.8
A0A0G2L7M3	Uncharacterized protein OS=Danio rerio OX=7955 PE=4 SV=1	A0A0G2L7M3	2	4324678	4585717	2.96622e+06	0	0	4692867	0	0	9772800	0	0	3514131	0	0	0	4.85758e+06	4.92188e+06	3.04667e+06	900768	1.74959e+06	4.95254e+06	-0.731807	-0.449193	0.211002	612435	321204	403217	542783	363299	5.29472e+06	-0.0524334	0.0534832	1.1183	1.26172e+06	584437	984905	24.9	84.3	33.7	135	36.1	-1.69	0.269	4.64	0.412	-9.59
Q6NZ15	Collagen, type I, alpha 3 OS=Danio rerio OX=7955 GN=col1a1b PE=2 SV=1	col1a1b	1	0	0	0	0	0	0	0	0	2.31597e+06	0	0	0	0	0	0	1.0152e+06	693628	550072	442568	778140	258055	-0.360572	0.0499307	-0.328708	394004	114760	1.44153e+06	1.15624e+06	275369	358106	0.467549	0.380125	-0.604811	304985	474448	525100	31.6	53.5	108	81.5	26.5	-1.53	0.268	-1.09	0.84	-1.16
F1R8W3	Desmin a OS=Danio rerio OX=7955 GN=desma PE=1 SV=1	desma	34	2.61576e+08	1.82965e+08	3.28196e+08	1.55897e+08	278111080	3.14438e+08	1.10857e+08	7.07893e+08	1.48774e+09	7.62055e+07	2.18034e+08	2.25196e+08	3.54936e+08	2.9722e+08	3.30159e+08	2.92137e+08	2.37647e+08	2.78844e+08	2.99178e+08	2.77262e+08	3.11422e+08	0.010344	0.0669584	0.0479879	4.08765e+08	4.34789e+08	7.95985e+08	1.30034e+08	1.65129e+08	3.56794e+08	-0.497418	-0.420455	-0.348487	3.26569e+08	3.13996e+08	3.40379e+08	10.5	5.85	39.6	56.2	4.04	1.1	0.267	-2.51	0.0661	2.03
F1QRR8	Ral GTPase-activating protein, alpha subunit 1 (catalytic) OS=Danio rerio OX=7955 GN=ralgapa1 PE=4 SV=2	ralgapa1	2	0	0	0	0	3.5745e+06	488211	4.06734e+06	4.58221e+06	10306470	0	2.3987e+06	0	1.99891e+06	1.23492e+06	1.6955e+06	794699	1.09478e+06	541879	2.65254e+06	4.06627e+06	604733	0.523459	0.569868	0.0476613	3.85994e+06	3.01413e+06	6.24946e+06	573808	2.23451e+06	775172	-0.827814	-0.129978	-0.906445	2.82798e+06	1.52477e+06	2.10654e+06	34.2	71.3	38.4	75.9	30.3	3.01	0.265	-3.66	0.054	5.4
Q6NVI6	Chaperonin-containing TCP1, subunit 5 (epsilon) OS=Danio rerio OX=7955 GN=cct5 PE=1 SV=1	cct5	2	2.6776e+06	2.57075e+06	2347534	2.52534e+06	5837457	3.1508e+06	1.31591e+06	3737346	3.98925e+06	2.27059e+06	6.47584e+06	5.03035e+06	2589057	2.60743e+06	4.30307e+06	3.21976e+06	3.40632e+06	3.11171e+06	3.9888e+06	6.67372e+06	3.33424e+06	0.0930195	0.292082	0.0299985	1.43954e+06	2.58662e+06	2.57335e+06	3.13903e+06	4.81294e+06	7.33247e+06	0.338572	0.269677	0.454752	2.67001e+06	2.86319e+06	4.65135e+06	4.59	37.9	29.9	41.4	32.2	1.44	0.264	2.32	0.0626	-1.48
R4GE14	Si:ch211-207i1.2 OS=Danio rerio OX=7955 GN=si:ch211-207i1.2 PE=4 SV=1	si:ch211-207i1.2	1	3.22561e+06	3.87827e+06	4.03118e+06	2.94597e+06	774780	1.28618e+06	0	0	0	0	0	1935089	1.29047e+06	2.79316e+06	2671823	3.49706e+06	3.94394e+06	3.6736e+06	4.522e+06	874594	1.32343e+06	0.111627	-0.654124	-0.443393	1.12691e+06	155765	103877	303674	398181	2.80051e+06	-0.569481	0.40761	1.43072	1.1877e+06	2.8064e+06	2.89134e+06	6.08	88.8	125	121	41.8	-1.65	0.264	2.53	0.392	-8.02
F8W4M7	Aconitate hydratase, mitochondrial (Fragment) OS=Danio rerio OX=7955 GN=aco2 PE=1 SV=2	aco2	17	8.4539e+07	9.17569e+07	9.4612e+07	3.0382e+07	1.19759e+08	2.62019e+07	7.68456e+07	2.0963e+08	2.467e+08	4.20684e+07	1.57484e+08	6.03377e+07	9.1166e+07	8.93351e+07	7.82282e+07	9.40929e+07	1.11523e+08	8.02522e+07	5.89135e+07	1.02585e+08	4.04536e+07	-0.203342	-0.0362802	-0.2975	1.00951e+08	1.37998e+08	1.43464e+08	6.24366e+07	1.1095e+08	1.08531e+08	-0.20867	-0.0947475	-0.121188	9.46608e+07	9.26974e+07	1.10517e+08	16.4	47.4	18.1	29.1	9.84	-1.42	0.263	-1.36	0.226	1.34
Q8N1N4	Keratin, type II cytoskeletal 78 OS=Homo sapiens GN=KRT78 PE=1 SV=2	KRT78	16	2.29748e+08	1.95403e+08	3.17466e+08	3.69509e+07	4.16363e+07	3.45855e+08	2.11182e+08	185747826	1.23749e+08	1.67077e+08	193030392	1.303e+08	2.08062e+08	1.84701e+08	181869160	2.70893e+08	2.04155e+08	2.61628e+08	8.11433e+07	5.07789e+07	3.00778e+08	-0.523546	-0.604276	0.0605612	1.88061e+08	1.22232e+08	7.61121e+07	2.32692e+08	1.42648e+08	2.68053e+08	0.0924832	0.067083	0.546767	1.87102e+08	1.89097e+08	2.00074e+08	14.7	94.6	43.7	30.1	3.64	-1.7	0.262	1.67	0.176	-1.91
Q6P3G1	Ceruloplasmin OS=Danio rerio OX=7955 GN=cp PE=1 SV=1	cp	2	3184668	1309649	0	422691	2.2687e+06	747730	0	465658	736000	664681	1.46566e+06	0	1.21917e+06	384417	1.19476e+06	4.05595e+06	1.70219e+06	1.86807e+06	700872	2.56982e+06	1.09519e+06	-0.762454	0.178895	-0.231903	815177	542202	685924	1.62815e+06	1.22749e+06	835141	0.300443	0.354859	0.0854838	1.99771e+06	685675	1.73469e+06	51.7	67.7	20	32.2	47.1	-1.75	0.26	1.81	0.0792	-3.73
B3DKQ1	Anion exchange protein OS=Danio rerio OX=7955 GN=slc4a1a PE=2 SV=1	slc4a1a	12	2.68952e+06	2.7954e+06	1.5328e+06	3.34968e+06	1.02558e+08	1.0683e+06	1.16916e+07	74995112	9.8585e+07	5.34811e+07	74305183	5.59128e+06	3.83938e+07	2.88329e+07	3.44293e+07	7.65705e+06	7.92986e+06	6.39108e+06	1.2044e+07	3.73033e+07	7.71281e+06	0.196709	0.672482	0.0816381	4.42382e+07	4.7703e+07	5.85461e+07	6.53921e+07	5.48717e+07	1.05624e+08	0.169728	0.0608027	0.256264	3.87737e+07	3.77924e+07	4.02145e+07	11.2	84	14.9	35.6	3.13	2.6	0.259	1.5	0.187	6.85
Q6NY31	Protein kinase, AMP-activated, beta 1 non-catalytic subunit, b OS=Danio rerio OX=7955 GN=prkab1b PE=1 SV=1	prkab1b	2	0	329029	0	802898	1.61076e+06	757628	2.26838e+06	3.76869e+06	5138082	1054823	5.6137e+06	1.30936e+06	1.28755e+06	1.48335e+06	1.19701e+06	834882	858242	1.34677e+06	1.28257e+06	2.38041e+06	1.04172e+06	0.186455	0.443042	-0.111544	2.15638e+06	2.49103e+06	3.18737e+06	1.90808e+06	4.18407e+06	2.1827e+06	-0.0531274	0.22522	-0.164438	1.95601e+06	2.40825e+06	2.25368e+06	28.5	45.5	20.1	45	10.4	1.55	0.258	1.06	0.984	2.58
B8A4H6	Phosphoglycerate mutase OS=Danio rerio OX=7955 GN=pgam1b PE=1 SV=1	pgam1b	2	1.05784e+07	5242390	2.90552e+07	4.6819e+06	1.27151e+06	1.05537e+07	1.51139e+07	5.92022e+06	4.25096e+06	5.53703e+06	2.78411e+07	4.78915e+06	1.15028e+07	9.84852e+06	1.01263e+07	1.15147e+07	7.71028e+06	2.62561e+07	8.50141e+06	2.70431e+06	1.08965e+07	-0.131761	-0.455014	-0.381946	1.42646e+07	4.16277e+06	3.19617e+06	7.85623e+06	2.00558e+07	2.53253e+07	-0.259044	0.682858	0.898924	1.0488e+07	9.89769e+06	1.10114e+07	64.6	57.2	85.1	50.5	5.32	-2.06	0.257	2.46	0.161	-2.1
Q6DC92	V-ral simian leukemia viral oncogene homolog Ba (ras-related) OS=Danio rerio OX=7955 GN=ralba PE=1 SV=1	ralba	16	3.65868e+07	2.09218e+07	5.88068e+07	1.70481e+07	1.07494e+09	5.40296e+07	1.92272e+09	2.73227e+09	2.6572e+09	8.10972e+08	2.16738e+09	4.0912e+07	1.12816e+09	1.0316e+09	8.94363e+08	3.84892e+07	3.75253e+07	6.15494e+07	7.61239e+07	6.87844e+08	6.26206e+07	0.296182	1.26317	0.00749363	1.79615e+09	1.55514e+09	1.4084e+09	1.25095e+09	1.47495e+09	7.97991e+08	-0.157102	-0.0229918	-0.246728	1.01599e+09	9.97035e+08	9.91329e+08	29.7	130	12.3	29.4	1.29	6.01	0.255	-1.35	0.209	34.6
F1Q9R5	STEAP family member 4 OS=Danio rerio OX=7955 GN=steap4 PE=4 SV=1	steap4	2	0	12008634	1.27308e+06	0	7.44211e+06	1.89581e+06	4.09037e+06	1.6005e+07	18661127	1.32643e+06	10896952	0	7507882	6767336	3.81531e+06	952244	1.02087e+06	2.10323e+06	1.5457e+06	8.51962e+06	1.9495e+06	0.210376	0.92145	-0.0329633	3.88196e+06	1.01172e+07	1.11031e+07	2.1224e+06	8.01337e+06	2.58617e+06	-0.262223	-0.101244	-0.632788	6.86657e+06	6.79989e+06	9.34429e+06	47.5	97.8	46.8	77.2	18.9	2.95	0.253	-1.97	0.228	6.16
Q5RFW4	Protein-L-isoaspartate O-methyltransferase OS=Danio rerio OX=7955 GN=pcmt PE=1 SV=1	pcmt	10	166200374	150890784	1.42873e+08	56210632	1.26193e+08	6.89648e+07	1.60489e+08	2.59139e+08	2.1993e+08	8.01093e+07	1.19431e+08	8.21875e+07	1.25625e+08	124715601	9.25469e+07	1.83263e+08	1.54672e+08	1.16854e+08	1.22241e+08	1.39711e+08	7.25726e+07	-0.17586	-0.0441802	-0.20687	1.51471e+08	1.58391e+08	1.26546e+08	1.18017e+08	8.02009e+07	1.42769e+08	-0.108382	-0.295552	0.0523857	1.27632e+08	1.26405e+08	1.21006e+08	22	31.2	11.5	27.7	2.82	-1.36	0.253	-1.28	0.249	-1.04
F1QZW1	Ventricular myosin heavy chain OS=Danio rerio OX=7955 GN=myh7 PE=1 SV=1	myh7	18	1.69121e+08	1.03008e+08	2.77829e+07	5.3526e+07	8.26291e+07	1.88342e+08	4.7319e+06	4.07937e+07	2.54022e+07	6.27133e+06	2.44778e+07	4.09694e+07	3.37742e+07	3.60803e+07	4.8563e+07	1.93038e+08	5.18694e+07	3.40445e+07	2.3277e+08	9.50144e+07	1.87477e+08	0.0812855	0.262878	0.7409	1.45293e+07	1.4836e+07	2.10411e+07	2.53276e+07	2.33662e+07	6.65561e+07	0.241349	0.197272	0.500119	3.90166e+07	4.21921e+07	5.69588e+07	93.7	40.9	21.9	63.5	20.8	1.85	0.252	2.29	0.155	-5.53
F1QUS9	Ubiquitin-specific peptidase 7 (herpes virus-associated) OS=Danio rerio OX=7955 GN=usp7 PE=1 SV=1	usp7	1	0	1.47507e+06	1.8026e+06	0	3.17457e+06	2255396	0	3.21194e+06	2.0885e+06	468629	2182444	0	0	2.13759e+06	3.6958e+06	3.29604e+06	1.49844e+06	1.6508e+06	3.17679e+06	3.629e+06	2.32336e+06	-0.0160042	0.384148	0.148421	1.09979e+06	2.09529e+06	1.3043e+06	634659	1.63482e+06	1.69142e+06	-0.238771	-0.107774	0.112875	3.44429e+06	2.14754e+06	4.00637e+06	46.4	21.8	35.1	45	29.8	1.42	0.252	-1.14	0.662	-1.43
A0A0R4IC54	Heat shock protein family, member 7 (cardiovascular) OS=Danio rerio OX=7955 GN=hspb7 PE=3 SV=1	hspb7	1	11050338	10806157	14712162	6.19177e+06	2.28785e+06	8.79788e+06	6772251	8.53112e+06	9.03165e+06	3041319	6.5389e+06	10264773	7885336	7.13336e+06	8725675	1.20601e+07	1.10016e+07	1.33016e+07	9.70952e+06	2.60771e+06	9.08805e+06	-0.0941527	-0.625198	-0.165432	6.39967e+06	5.41236e+06	5.37943e+06	4.30168e+06	4.7929e+06	1.55021e+07	-0.17252	-0.0527883	0.459653	7.18032e+06	7.16933e+06	9.50239e+06	9.5	55.1	10.1	77.2	16.9	-1.7	0.252	1.43	0.705	-2.12
F8W5V4	Troponin T type 2a (cardiac) OS=Danio rerio OX=7955 GN=tnnt2a PE=1 SV=1	tnnt2a	15	1.20087e+09	8.62051e+08	1.04365e+09	4.29189e+08	5.92441e+07	6.35629e+08	9.66192e+07	2.00704e+08	1.93699e+08	7.45097e+07	231112614	5.68083e+08	4.60339e+08	4.35585e+08	347660258	1.33319e+09	8.79928e+08	9.31325e+08	7.12802e+08	8.53673e+07	6.59179e+08	-0.271925	-1.01316	-0.150098	1.14141e+08	1.22624e+08	1.07386e+08	1.98839e+08	1.67902e+08	8.8637e+08	0.241061	0.136483	0.916665	4.14659e+08	4.38047e+08	3.81664e+08	23.7	71.6	6.66	97.2	6.88	-2.16	0.251	3.64	0.2	-9.14
P00330	Alcohol dehydrogenase 1 OS=Saccharomyces cerevisiae (strain ATCC 204508 / S288c) GN=ADH1 PE=1 SV=5	ADH1	20	6.21927e+09	5.83381e+09	5.97653e+09	6.15631e+09	6.71707e+09	5.61795e+09	6.88785e+09	5.93304e+09	7.32814e+09	7.36339e+09	6.58201e+09	5.68964e+09	7.08031e+09	6194498040	5.81496e+09	6.90208e+09	5.96514e+09	5.27829e+09	1.0997e+10	8.04385e+09	5.84987e+09	0.202293	0.129843	0.0446533	6.40695e+09	3.35226e+09	3.81411e+09	1.1725e+10	4.45525e+09	9.48698e+09	0.262462	0.123534	0.395735	6.28642e+09	6.23455e+09	6.47121e+09	13.5	31.1	36.4	43.5	1.96	1.37	0.25	1.89	0.175	-1.34
A0A286YBE9	Plectin a OS=Danio rerio OX=7955 GN=pleca PE=1 SV=1	pleca	4	6.26221e+06	6.45608e+06	3.63011e+06	5.39994e+06	13328484	6.33466e+06	5345696	7.95239e+06	9384495	3.64992e+06	3.77799e+06	5.96751e+06	7.73466e+06	3.93287e+06	4455956	7.12909e+06	6.98941e+06	7.91295e+06	9.21971e+06	8.19796e+06	7.27309e+06	0.111683	0.0692656	-0.0366196	6.07954e+06	5.35068e+06	8.54764e+06	6.05675e+06	3.20826e+06	9.22134e+06	-0.00163085	-0.222139	0.0329476	8.25922e+06	8.50312e+06	6.85294e+06	6.78	11.8	25.2	48.8	11.3	1.12	0.249	-1.08	0.695	-1.1
Q90Y50	Coxsackievirus and adenovirus receptor homolog OS=Danio rerio OX=7955 GN=cxadr PE=2 SV=1; Duplicate proteins: B7ZUW2|B7ZUW2_DANRE	cxadr	9	7.86003e+06	5.89277e+06	0	0	2.20662e+08	1.60479e+06	7.77826e+07	1.44825e+08	1.20124e+08	1.42018e+08	2.82646e+08	4295549	7.59716e+07	7.94412e+07	76604427	1.2997e+07	7.96993e+06	1.11428e+07	6.56105e+06	1.08236e+07	6.6575e+06	-0.29687	0.132917	-0.223684	8.06792e+07	8.10545e+07	7.17013e+07	2.10474e+08	1.85939e+08	1.76958e+08	0.416437	0.360592	0.392343	9.05847e+07	8.06097e+07	7.76768e+07	23.8	30.4	6.8	9.08	8.16	-1.34	0.247	2.46	0.000233	7.27
E7F1F0	Myotubularin-related protein 10 OS=Danio rerio OX=7955 GN=mtmr10 PE=1 SV=1	mtmr10	1	0	0	0	0	0	8265682	1.60008e+06	0	0	0	3.2323e+06	0	2.80221e+06	1.18457e+06	1.80557e+06	515040	224104	279010	273654	222653	81815.6	-0.274638	-0.00282214	-0.532783	1.51992e+06	334775	114045	173897	2.40249e+06	688988	-0.941527	0.855909	0.781134	2.56729e+06	1.18986e+06	1.94983e+06	45.5	51.6	115	107	36.3	-1.76	0.247	1.66	0.643	1.93
Q2LEK1	Dynein cytoplasmic 1 heavy chain 1 OS=Danio rerio OX=7955 GN=dync1h1 PE=2 SV=1	dync1h1	28	2.15238e+07	17550464	3.40853e+06	6.5261e+06	1.49153e+08	4.68455e+06	2.10047e+07	8.61458e+07	1.35265e+08	2.00099e+07	5.22458e+07	0	3.17398e+07	2.98738e+07	2.51721e+07	3.63458e+07	1.78963e+07	2.47848e+07	2.92616e+07	7.68996e+07	3.30047e+07	-0.0941565	0.633161	0.124391	6.40917e+07	6.08118e+07	8.40433e+07	3.51511e+07	4.45244e+07	2.03846e+07	-0.260863	-0.13539	-0.6152	4.2046e+07	3.6055e+07	3.78006e+07	35.4	57.1	18.1	36.5	7.98	1.76	0.246	-2.09	0.0614	2.64
F1Q8G3	Eukaryotic translation initiation factor 4Bb OS=Danio rerio OX=7955 GN=eif4bb PE=1 SV=1	eif4bb	2	3.40865e+06	3.93352e+06	1956445	1161755	787676	2.58143e+06	1049148	988909	1075738	693178	0	949855	483091	707212	568793	3.68287e+06	3.99729e+06	3.16084e+06	2.39516e+06	1.33682e+06	3.61494e+06	-0.186852	-0.475691	0.0582977	1.13445e+06	1.15534e+06	1.80596e+06	1.78695e+06	2.35683e+06	1.69798e+06	0.197325	0.309618	-0.0267755	699079	916316	1.0189e+06	11.7	46.6	28	18.4	18.6	-1.48	0.246	1.43	0.124	-2.65
Q5BJA1	Zgc:114188 OS=Danio rerio OX=7955 GN=zgc:114188 PE=1 SV=1	zgc:114188	2	0	4.50929e+06	8.081e+06	0	20946252	6.92243e+06	9.69135e+06	3.35774e+07	3.12424e+07	6.86989e+06	3.84734e+07	2.80344e+06	1.52551e+07	1.41519e+07	1.2998e+07	5.37484e+06	4.58373e+06	7.34796e+06	7.31277e+06	2.42132e+07	7.13846e+06	0.133717	0.722833	-0.0125624	9.1657e+06	2.07932e+07	1.82162e+07	9.7645e+06	2.75011e+07	4.04324e+06	0.0274847	0.12143	-0.653728	1.38787e+07	1.42242e+07	1.41423e+07	24.7	76.1	38	88.8	1.28	2.23	0.245	-1.17	0.573	2.78
Q6TNR6	Peptidyl-prolyl cis-trans isomerase OS=Danio rerio OX=7955 GN=ppiab PE=2 SV=1	ppiab	3	0	3.10253e+06	2.56178e+06	0	1.54393e+07	0	3.41469e+06	1.72151e+07	1.60644e+07	8.94286e+06	4869547	4609128	7.39068e+06	1.59348e+07	1.23181e+07	3.84957e+06	4.34068e+06	3.52719e+06	1.85394e+06	4.2878e+06	2.06308e+06	-0.317318	-0.00532329	-0.232913	1.13878e+07	1.1045e+07	9.71967e+06	6.42349e+06	3.87547e+06	7.55995e+06	-0.248668	-0.454842	-0.109133	1.57114e+07	1.60137e+07	1.33622e+07	10.5	49.3	8.22	31.7	9.66	-1.43	0.244	-1.8	0.0828	2.74
Q4V8U8	RAB27A, member RAS oncogene family OS=Danio rerio OX=7955 GN=rab27a PE=1 SV=1	rab27a	1	0	0	0	0	8318540	0	11419148	21108478	17087308	6.09881e+06	14969383	0	10785727	7949812	7667476	249482	1.0495e+06	980738	117631	369845	448365	-0.326517	-0.452963	-0.339921	1.07706e+07	1.30503e+07	9.96976e+06	8.76676e+06	1.07939e+07	7.58863e+06	-0.0894025	-0.0824418	-0.118521	9.80327e+06	7.99017e+06	8.34424e+06	58.3	55.4	14.2	17.9	11	-2.44	0.243	-1.24	0.165	14.8
E7FDY6	EH domain-binding protein 1-like 1b OS=Danio rerio OX=7955 GN=ehbp1l1b PE=4 SV=1	ehbp1l1b	1	0	0	0	0	0	779634	0	0	0	396149	965343	0	0	450434	469114	176411	411819	902741	1.12406e+06	723709	801397	0.804263	0.244858	-0.0517156	208143	472297	255245	534410	734887	658173	0.409512	0.192005	0.411384	310821	452306	502966	74.6	24	45.2	15.7	23.6	1.78	0.242	2.06	0.0728	-1.59
E7FFN2	Alpha-kinase 3a OS=Danio rerio OX=7955 GN=alpk3a PE=4 SV=1	alpk3a	2	4.70165e+06	5046241	6.37136e+06	1.37081e+06	676495	5.65509e+06	672002	1.12856e+06	2.03437e+06	554616	1.23995e+06	3.47625e+06	1.42907e+06	3.53102e+06	2.60681e+06	5.08878e+06	5.12926e+06	5.81344e+06	2.8189e+06	2.20846e+06	5.83008e+06	-0.256534	-0.365966	0.00124141	761584	1.11014e+06	1.85052e+06	3.41462e+06	2.29349e+06	5.0197e+06	0.651624	0.31512	0.433385	1.66339e+06	3.84785e+06	3.04636e+06	7.62	53.6	44.8	38.3	38.7	-1.48	0.242	2.88	0.0357	-4.31
A1A5Z8	S100u protein (Fragment) OS=Danio rerio OX=7955 GN=s100u PE=2 SV=1	s100u	1	0	0	0	0	1.10863e+06	0	831237	1.16396e+06	1.60967e+06	780852	2533772	0	834914	644071	525825	164753	374015	832423	910112	1.25547e+06	470776	0.742261	0.525918	-0.24753	791456	781597	1.01377e+06	1.07011e+06	1.89239e+06	420479	0.131003	0.384028	-0.382193	770402	646822	564113	74.7	44.8	15.2	65.4	15.7	1.92	0.241	1.31	0.839	1.89
E7F6M7	Glycerol-3-phosphate acyltransferase 1, mitochondrial OS=Danio rerio OX=7955 GN=gpam PE=3 SV=1	gpam	13	1.2859e+08	2.25786e+08	1.86153e+08	1.12885e+08	5899266	2.00226e+08	3202155	5.50095e+06	8.75487e+06	7.82749e+06	5.19856e+06	1.54998e+08	6.38776e+07	5.10609e+07	5.3708e+07	1.60708e+08	2.30053e+08	1.68057e+08	1.72476e+08	1.47873e+08	1.39171e+08	0.0306935	-0.191939	-0.0819062	8.50374e+06	7.02269e+06	1.06904e+07	2.33655e+07	2.601e+07	1.21328e+08	0.438966	0.568638	1.05497	6.38758e+07	5.68109e+07	7.62483e+07	20.5	11.3	21.1	98.1	15	-1.22	0.241	6.51	0.0901	-21.3
A0A0R4IBQ7	Coagulation factor VIII, procoagulant component (Fragment) OS=Danio rerio OX=7955 GN=f8 PE=1 SV=2	f8	2	778218	943098	665669	710913	6.83487e+06	429849	6.08374e+06	6154055	6.37888e+06	2.79331e+06	6.53569e+06	0	4.00021e+06	4.18244e+06	4473894	1.06224e+06	1.24414e+06	949696	1.39405e+06	7.81886e+06	1.70195e+06	0.118056	0.798275	0.253362	5.76551e+06	4.01258e+06	3.92951e+06	3.88501e+06	4.85626e+06	1.13105e+07	-0.171445	0.0828781	0.459145	3.6721e+06	4.20193e+06	4.83722e+06	13.7	99.6	22.7	60.4	13.8	3.35	0.239	1.46	0.483	4.21
B5DE37	Uncharacterized protein (Fragment) OS=Danio rerio OX=7955 GN=gcn1 PE=2 SV=1	gcn1	1	2.32567e+08	1.94601e+08	2.92946e+08	3.22335e+08	2.69824e+08	2.35907e+08	280261494	2.34822e+08	2.7953e+08	2.99104e+08	2.27207e+08	2.74879e+08	239305863	2.32772e+08	2.10234e+08	2.58023e+08	1.98756e+08	2.60064e+08	5.6633e+08	3.2094e+08	2.45319e+08	0.341412	0.208105	-0.0253481	2.61319e+08	1.35541e+08	1.48995e+08	4.70633e+08	1.55244e+08	4.51483e+08	0.255511	0.0589436	0.481469	2.13568e+08	2.34206e+08	2.32868e+08	14.6	44.5	38	49.2	5.09	1.58	0.239	1.97	0.235	-1.31
Q7ZVP6	Sarcolemma associated protein OS=Danio rerio OX=7955 GN=slmapb PE=2 SV=1	slmapb	1	0	0	0	0	369987	0	0	0	1.0789e+06	496640	1.93115e+06	0	1.03867e+06	0	0	906519	277541	252380	135073	414902	78886.6	-0.826809	0.174619	-0.505051	342106	547719	688344	673500	1.45008e+06	821325	0.294178	0.422835	0.0767096	957179	372675	239588	77.4	85.9	33.1	42	73	-2.28	0.239	1.87	0.12	1.1
F1Q529	E3 ubiquitin-protein ligase TRIP12 OS=Danio rerio OX=7955 GN=trip12 PE=1 SV=2	trip12	3	0	1.52005e+06	2.12671e+06	3.12037e+06	6.47257e+06	1.29718e+06	1.86541e+06	6.28909e+06	6.42846e+06	2.60027e+08	4.77291e+06	0	3.15699e+06	2.88155e+06	2.89195e+06	2.47761e+06	2.33475e+06	2.18411e+06	7.63166e+06	7.4013e+06	2.01485e+06	0.488585	0.501068	-0.0350315	2.45045e+06	4.13855e+06	4.00192e+06	4.0796e+08	3.59244e+06	2.94409e+07	2.22137	-0.0614588	0.866683	3.50884e+06	2.8943e+06	3.11388e+06	6.29	55.9	26.6	154	9.82	2.44	0.236	41.6	0.23	1.51
T1ECV2	Myosin light chain kinase 3 OS=Danio rerio OX=7955 GN=mylk3 PE=4 SV=2	mylk3	38	1.03099e+09	1140315638	1.18419e+09	6.60528e+08	2.57849e+08	6.99268e+08	2.61465e+08	4.54776e+08	4.00911e+08	1.12418e+08	3.39244e+08	6.74901e+08	6.40915e+08	6.03653e+08	5.70524e+08	1.13364e+09	1.18309e+09	1.071e+09	1.15941e+09	4.54089e+08	7.03657e+08	0.00976098	-0.415877	-0.182427	2.74638e+08	2.73259e+08	2.23908e+08	2.20139e+08	2.77882e+08	1.02462e+09	-0.0960632	0.00728598	0.660492	5.87551e+08	6.11822e+08	6.44017e+08	4.97	46.3	11.2	88.4	4.61	-1.46	0.236	1.97	0.457	-4.39
A5WV25	Membrane protein, palmitoylated 1 OS=Danio rerio OX=7955 GN=mpp1 PE=3 SV=1	mpp1	15	7.15386e+09	5122666891	1.70901e+08	2.61747e+08	2.27401e+08	156758659	3.80805e+08	6.04549e+08	433643325	2.0488e+08	620863553	1.3659e+08	2.59248e+08	2.57843e+08	2.20787e+08	8.08935e+09	5.25491e+09	1.73353e+08	4.67487e+08	2.22177e+08	1.71134e+08	-1.23814	-1.37387	-0.00559645	3.5778e+08	3.63489e+08	2.4559e+08	2.90881e+08	4.31957e+08	4.14954e+08	-0.0899005	0.0749489	0.22779	2.49286e+08	2.73719e+08	2.43268e+08	89	55.2	20.6	20.3	6.31	-15.7	0.236	1.18	0.414	-14
B0CLW6	Poliovirus receptor-related 2-like OS=Danio rerio OX=7955 GN=pvrl2l PE=1 SV=1	pvrl2l	8	1.89434e+06	0	2.10066e+06	0	287790614	5.50992e+06	6.79014e+07	1.4082e+08	142093562	1.39618e+08	1.91025e+08	3.14386e+06	8.63831e+07	62199455	6.94109e+07	5.5818e+06	8.68611e+06	6.3949e+06	8.26242e+06	2.2181e+07	8.46965e+06	0.170333	0.407156	0.122031	6.9503e+07	8.68475e+07	8.28576e+07	2.06327e+08	1.35901e+08	1.77962e+08	0.472552	0.194464	0.331994	7.91464e+07	7.78965e+07	7.65341e+07	23.4	61.5	11.4	20.4	1.68	1.88	0.235	2.17	0.0107	11.6
B8JLS3	Myosin, heavy chain 6, cardiac muscle, alpha OS=Danio rerio OX=7955 GN=myh6 PE=1 SV=1	myh6	18	7.88532e+07	1.05696e+08	3.67219e+07	5.09324e+07	4.52074e+07	1.07913e+08	6.5638e+06	7.94089e+07	4.25751e+07	3.85308e+06	31099786	5.92819e+07	4.31414e+07	3.58423e+07	4.20255e+07	8.74199e+07	1.02397e+08	5.74877e+07	9.03491e+07	1.27888e+08	1.06787e+08	0.0143136	0.0965424	0.268944	2.85784e+07	4.45173e+07	2.85672e+07	4.27657e+07	2.19236e+07	5.52264e+07	0.175058	-0.307618	0.286278	4.3759e+07	4.94875e+07	4.93496e+07	27.7	17.4	27.2	42.1	6.88	1.31	0.234	1.18	0.73	-2.43
A5PF53	Rho GTPase-activating protein 35b OS=Danio rerio OX=7955 GN=arhgap35b PE=4 SV=1	arhgap35b	10	1.41378e+07	2.23101e+07	2.75478e+07	7.7388e+06	19752269	1.01041e+07	2.93965e+07	46845013	3.49361e+07	4.45133e+06	2.04433e+07	9.43689e+06	2.25583e+07	1.93689e+07	2.78794e+07	1.71945e+07	2.18385e+07	2.11879e+07	1.70051e+07	1.94668e+07	1.28569e+07	-0.00481001	-0.0499291	-0.216953	2.50337e+07	3.13846e+07	2.33757e+07	8.4228e+06	1.67846e+07	1.59325e+07	-0.473069	-0.271807	-0.16648	2.61112e+07	2.64528e+07	2.48669e+07	12.5	20.3	15.9	33.6	3.23	-1.22	0.233	-1.94	0.0718	1.33
A8WGL4	Ribosomal protein L7 OS=Danio rerio OX=7955 GN=rpl7 PE=2 SV=1	rpl7	4	2.82336e+06	726137	0	0	2.46653e+07	0	0	7309681	16767156	1.03131e+06	2.39408e+07	555592	2288132	914706	1.46179e+06	4.00745e+06	2.53517e+06	2.59464e+06	1.96337e+06	1.39679e+06	3.01951e+06	-0.309866	-0.258876	0.0658585	5.35049e+06	5.29302e+06	5.22634e+06	3.3715e+06	5.0337e+06	2.98984e+06	-0.200571	-0.0218157	-0.242549	3.20864e+06	3.27555e+06	2.73635e+06	27.4	38.7	1.17	28.6	9.56	-1.43	0.233	-1.39	0.151	1.74
B8JIS8	Glutathione S-transferase mu, tandem duplicate 1 OS=Danio rerio OX=7955 GN=gstm.1 PE=1 SV=1	gstm.1	2	6.53806e+06	4447011	1.19921e+07	8.93564e+06	3.11406e+07	7.65242e+06	15684240	27987176	2.34677e+07	18854729	2.35818e+07	8.89133e+06	1.75317e+07	1.70568e+07	1.37085e+07	7.92863e+06	4.90014e+06	1.0888e+07	1.3968e+07	3.61469e+07	7.89558e+06	0.245935	0.867862	-0.139562	1.48101e+07	1.74886e+07	1.38268e+07	2.74325e+07	1.70643e+07	2.11948e+07	0.267706	-0.0106646	0.185507	1.594e+07	1.71448e+07	1.49253e+07	37.9	76.9	12.3	23.8	6.94	2.45	0.232	1.42	0.115	1.94
E9QI62	Filamin A, alpha (actin-binding protein 280) OS=Danio rerio OX=7955 GN=flna PE=1 SV=1	flna	12	2.58449e+07	1.87531e+07	19175930	910362	5.4795e+07	2.11966e+07	8.57696e+06	3.07063e+07	6.55173e+07	9.7255e+06	2.97391e+07	3.11918e+06	26990462	1.89723e+07	29181471	3.30613e+07	2.38979e+07	1.926e+07	5.76951e+07	4.96144e+07	2.28123e+07	0.241819	0.317249	0.0735132	1.56444e+07	2.08711e+07	3.97649e+07	1.94141e+07	1.85677e+07	2.70033e+07	0.0937584	-0.0507868	-0.168082	2.95432e+07	2.44151e+07	3.36789e+07	27.6	42.1	49.9	21.4	15.9	1.71	0.232	-1.17	0.772	1
E7F923	Si:dkey-46g23.1 OS=Danio rerio OX=7955 GN=si:dkey-46g23.1 PE=1 SV=2	si:dkey-46g23.1	1	544251	512798	0	0	0	0	0	0	0	0	0	0	0	0	0	584419	520315	577274	166819	128372	645816	-0.54448	-0.607798	0.0487269	200726	390786	173182	187132	1.0552e+06	126653	-0.030456	0.431398	-0.135887	452216	1.0123e+06	807787	6.27	91.9	46.5	114	37.4	-1.79	0.232	1.79	0.793	-2.2
Q803P2	T-complex 1 OS=Danio rerio OX=7955 GN=tcp1 PE=1 SV=1	tcp1	3	0	0	905310	1.12375e+06	1.73114e+07	552644	1.01214e+07	1.16947e+07	2.52803e+06	6.53201e+06	6.26824e+06	669966	1.48527e+06	1.7221e+06	7.05823e+06	1.41608e+06	1.10859e+06	2.261e+06	3.25804e+06	6.32469e+06	1.46027e+06	0.361868	0.75627	-0.189868	2.95448e+06	2.71188e+06	2.5514e+06	9.36238e+06	5.29259e+06	2.34031e+06	0.500905	0.290398	-0.0375056	1.93647e+06	2.18488e+06	1.28562e+06	37.4	66.8	7.41	62.2	25.8	2.31	0.231	2.07	0.286	1.72
Q4VBV2	40S ribosomal protein S27 OS=Danio rerio OX=7955 GN=rps27.1 PE=1 SV=1	rps27.1	1	1.47523e+06	0	4.02568e+06	2772075	9985018	6.054e+06	8.9512e+06	18276192	20830530	8390644	17938136	4.17584e+06	10650857	8.62034e+06	8088174	1.59264e+06	6.26472e+06	3.66862e+06	4.24764e+06	1.15318e+07	6.24894e+06	0.426029	0.264997	0.231303	8.45026e+06	1.13457e+07	1.20761e+07	1.21509e+07	1.28883e+07	6.16325e+06	0.157738	0.0553635	-0.292119	9.68141e+06	8.66433e+06	8.80457e+06	60.9	51.3	18.1	35.5	6.09	1.91	0.231	-1.02	0.832	2.77
F1QE75	TBC1 domain family, member 4 (Fragment) OS=Danio rerio OX=7955 GN=tbc1d4 PE=1 SV=1	tbc1d4	3	2.27059e+08	2.75069e+08	2.11852e+08	7.89048e+07	6.91031e+06	101351928	6.54655e+06	1.46296e+07	7.39781e+06	3.46133e+06	7.95214e+06	6.2048e+06	1.45379e+06	9.07519e+06	7.48064e+06	2.51995e+08	2.81582e+08	1.83022e+08	1.42467e+08	7.90031e+06	1.06888e+08	-0.247678	-1.55196	-0.233573	6.21112e+06	9.4038e+06	8.12804e+06	4.97711e+06	5.92998e+06	9.34249e+06	-0.0961927	-0.200251	0.0604767	7.38993e+06	9.11896e+06	8.41046e+06	21.2	81.3	20.3	34	10.5	-2.79	0.23	-1.17	0.47	-30.2
A6MH29	Lysyl oxidase-like 1 OS=Danio rerio OX=7955 GN=loxl1 PE=2 SV=1	loxl1	1	4.73787e+08	7.38421e+08	1.7918e+09	2.72129e+09	7.26265e+08	1.92281e+09	2.48345e+09	1.41981e+09	1.47954e+09	6.06998e+08	1.96817e+09	2.15439e+09	2.31852e+09	2.47014e+09	1073053257	5.27664e+08	7.55301e+08	1.57318e+09	5.08381e+09	8.71529e+08	2.00806e+09	0.983832	0.0621617	0.105998	2.29749e+09	7.78535e+08	7.47237e+08	9.70926e+08	1.28853e+09	3.72956e+09	-0.374068	0.218817	0.6982	2.04163e+09	2.48722e+09	1.19896e+09	57.8	82.1	69.5	75.6	34.3	2.79	0.229	1.57	0.492	1.34
B0V0Y4	Paralemmin 1b OS=Danio rerio OX=7955 GN=palm1b PE=4 SV=1	palm1b	29	8.45797e+07	8.71408e+07	1.42769e+08	9.04251e+07	5.14529e+08	8.41161e+07	1.2216e+09	1.73912e+09	1.52668e+09	3.27163e+08	1.06409e+09	7.16807e+07	6.06129e+08	6.10646e+08	5.03598e+08	1.07148e+08	1.06337e+08	1.07901e+08	2.16781e+08	4.21743e+08	1.05164e+08	0.306035	0.598363	-0.0111596	1.12973e+09	9.73485e+08	8.43494e+08	4.8339e+08	7.37172e+08	5.61418e+08	-0.368678	-0.120761	-0.176795	5.55475e+08	6.17296e+08	5.72664e+08	0.73	64.8	14.6	21.9	5.48	2.31	0.229	-1.65	0.0326	9.17
A0A0R4ICR8	Basigin OS=Danio rerio OX=7955 GN=bsg PE=1 SV=1	A0A0R4ICR8	5	1.08202e+06	0	1.08922e+06	2.52258e+06	88068054	1.35035e+06	2.52335e+08	3.18414e+08	3.92185e+08	6.04434e+07	2.34881e+08	3.60936e+06	1.42889e+08	9.29532e+07	4.0138e+07	3.34579e+06	3.05794e+06	3.37729e+06	5.40485e+06	1.59167e+07	3.76073e+06	0.208285	0.716424	0.0467031	2.36475e+08	1.89218e+08	2.15468e+08	9.30973e+07	1.64685e+08	4.87415e+07	-0.404848	-0.0603108	-0.645483	1.28843e+08	9.3458e+07	6.95715e+07	5.4	78.9	11.1	57.3	30.7	2.56	0.227	-2.09	0.132	65.6
Q4V974	Zgc:73237 protein OS=Danio rerio OX=7955 GN=jpt1b PE=2 SV=1	jpt1b	1	1.58083e+06	1.76049e+06	0	1.96384e+06	1.93601e+06	1.60887e+06	0	0	0	1.44471e+06	0	2.87139e+06	0	0	0	1.70729e+06	1.78874e+06	1.50277e+06	2.97949e+06	2.20339e+06	1.65621e+06	0.241835	0.0905444	0.0422243	1.08669e+06	142565	808838	2.0084e+06	3.83613e+06	4.19763e+06	0.266743	1.42988	0.715143	211480	417052	663635	8.84	29.2	71.4	35.1	52.6	1.37	0.227	4.93	0.086	-2.45
Q1L8T2	Ubiquitin-associated protein 2-like OS=Danio rerio OX=7955 GN=ubap2l PE=4 SV=2	ubap2	7	36986881	4.74211e+07	5.22306e+08	401865535	1.11796e+08	3.70992e+08	2.45123e+08	4.5237e+08	3.10115e+08	2.38423e+08	3.27763e+08	4.39707e+08	3.50966e+08	3.55394e+08	3.24565e+08	7.02412e+07	4.82598e+07	4.63285e+08	6.99256e+08	2.09389e+08	3.8562e+08	0.998044	0.637368	-0.0796889	2.30048e+08	2.57943e+08	1.65829e+08	3.8616e+08	2.23523e+08	7.13129e+08	0.224948	-0.0622012	0.633507	3.13397e+08	3.582e+08	3.52765e+08	120	57.5	21.7	56.6	7.16	2.22	0.226	2.02	0.202	1.12
A8E563	Zgc:65997 OS=Danio rerio OX=7955 GN=zgc:65997 PE=2 SV=1	zgc:65997	2	0	0	986664	0	0	0	1.1754e+06	10717784	2.9689e+06	0	0	0	0	0	872107	1.21933e+06	1.24597e+06	1.38301e+06	1.33514e+06	722642	507278	0.0394053	-0.236584	-0.435581	1.66367e+06	6.88156e+06	2.05101e+06	833715	455075	1.38313e+06	-0.300051	-1.1796	-0.171105	597161	1.60342e+06	1.17251e+06	6.85	50.2	82.3	52.4	44.9	-1.5	0.226	-3.97	0.0877	2.75
Q803D7	Protein disulfide-isomerase (Fragment) OS=Danio rerio OX=7955 GN=pdia3 PE=2 SV=1	pdia3	3	0	5.23715e+06	1.13026e+07	0	7.49954e+06	0	1.45666e+06	5502675	5.6633e+06	4.40731e+06	10283483	0	5.05942e+06	5934244	3.41713e+06	5.72429e+06	5.90903e+06	1.03042e+07	1.21029e+06	8.55818e+06	1.20612e+06	-0.674831	0.160865	-0.931622	3.06491e+06	3.98706e+06	3.7161e+06	6.13596e+06	8.68833e+06	5.68157e+06	0.301465	0.338284	0.184381	4.88849e+06	7.66733e+06	3.94661e+06	35.5	116	13.2	23.7	35.2	-2	0.226	1.9	0.0214	-2.04
Q6IQW8	Solute carrier family 12 (Potassium/chloride transporters), member 2 OS=Danio rerio OX=7955 GN=slc12a2 PE=2 SV=1	slc12a2	2	1771867	2.96278e+06	3.51539e+06	2226949	22594071	3929985	5766191	1.9616e+07	26964231	6.66228e+06	3.07752e+07	2876655	1.51992e+07	9.12853e+06	1.04635e+07	2.26697e+06	3.84469e+06	3.61827e+06	3.95079e+06	2.03363e+07	5.21616e+06	0.241238	0.72341	0.15885	7.26058e+06	1.22987e+07	1.56651e+07	9.46349e+06	2.20916e+07	1.33981e+07	0.11508	0.254368	-0.0678922	1.38168e+07	1.13441e+07	1.13787e+07	26.3	92.7	36	43.1	11.6	3.03	0.225	1.28	0.528	3.62
F1QQ42	NADH dehydrogenase (ubiquinone) 1 alpha subcomplex, 1 OS=Danio rerio OX=7955 GN=ndufa1 PE=1 SV=1	ndufa1	1	0	0	3.12591e+06	0	1.75275e+06	3.1064e+06	0	6019065	6.64367e+06	0	0	0	2.85089e+06	3.62991e+06	2.32137e+06	593999	222455	2.85306e+06	2.71917e+06	1.99304e+06	3.20208e+06	0.660651	0.952275	0.0501217	4.82632e+06	3.85681e+06	3.99661e+06	670258	818380	799065	-0.857374	-0.673274	-0.69911	2.61162e+06	3.64742e+06	2.51021e+06	116	23.1	12.4	10.6	21.5	2.16	0.225	-5.54	5.71e-05	3.46
F1QNB3	Ankyrin 3b OS=Danio rerio OX=7955 GN=ank3b PE=1 SV=2	ank3a	55	5.33977e+08	7.4252e+08	8.05876e+08	9.59276e+08	8.3251e+08	639288356	1.13618e+09	1.70909e+09	1.74719e+09	4.78216e+08	1.35158e+09	7.60877e+08	1.0193e+09	9.49573e+08	8.58561e+08	6.3352e+08	7.70662e+08	7.26856e+08	1.77345e+09	8.9982e+08	8.0034e+08	0.447059	0.067292	0.0418262	1.09746e+09	1.0495e+09	9.74259e+08	7.49705e+08	9.45264e+08	1.30241e+09	-0.1655	-0.0454296	0.126074	9.70599e+08	9.79343e+08	9.68528e+08	9.86	46.2	5.97	28.1	0.59	1.63	0.223	-1.04	0.726	1.46
A0A0R4IF09	Serine/threonine-protein phosphatase OS=Danio rerio OX=7955 GN=ppp3ccb PE=1 SV=1	ppp3ccb	1	0	0	0	0	1.52381e+06	0	0	2.02201e+06	1.75167e+06	539738	0	0	0	1.95947e+06	1.19209e+06	926167	409590	163542	604453	1.73055e+06	840330	-0.185327	0.625836	0.710821	1.68724e+06	1.33657e+06	1.10019e+06	733363	909324	256378	-0.361858	-0.167272	-0.632584	3.04932e+06	1.96854e+06	1.28449e+06	77.9	56.1	21.5	53.4	42.4	2.12	0.222	-2.17	0.14	2.75
B0R1B8	Neurofilament, light polypeptide b OS=Danio rerio OX=7955 GN=neflb PE=1 SV=1	neflb	1	3.13843e+06	4.42074e+06	2.71987e+06	3.11277e+06	0	3.57887e+06	897862	10748845	0	201316864	0	1.82966e+06	18066724	15862202	13449062	3.40205e+06	4.49625e+06	2.48457e+06	4.78561e+06	9.47525e+06	3.69017e+06	0.148197	0.32374	0.171796	854656	6.77456e+06	2.49231e+06	3.13867e+08	5.55641e+07	2.64414e+06	2.56496	0.913913	0.025682	1.63712e+07	1.59462e+07	1.46801e+07	29.1	51.4	90.6	134	5.62	1.73	0.222	36.8	0.184	-1.03
Q5PRD0	14-3-3 protein beta/alpha-A OS=Danio rerio OX=7955 GN=ywhaba PE=2 SV=2	ywhaba	9	1.30612e+08	8.46989e+07	2.12354e+08	1.90561e+07	1.49321e+08	4.61126e+07	3.65115e+07	129359404	1.22225e+08	8.15188e+07	1.97388e+08	1.70551e+07	9.53797e+07	7.07495e+07	9.12503e+07	1.46815e+08	8.92217e+07	1.76411e+08	4.86858e+07	1.44627e+08	5.10795e+07	-0.47937	0.209779	-0.538279	4.95165e+07	8.09326e+07	7.14594e+07	1.03773e+08	1.39567e+08	8.2995e+07	0.321334	0.236659	0.0649926	8.7653e+07	8.13321e+07	9.13924e+07	32.2	67.2	23.9	26.3	5.86	-1.69	0.222	1.62	0.0858	-2.04
A4QNV2	Jph2 protein OS=Danio rerio OX=7955 GN=jph2 PE=2 SV=1	jph2	12	4.47344e+06	2.20399e+06	3.70393e+06	3.58391e+06	2.01975e+08	7081867	195955066	245508256	2.57324e+08	9.42285e+07	2.89791e+08	1.25237e+07	9.29096e+07	7.13368e+07	7.77404e+07	9.02258e+06	7.22541e+06	9.16676e+06	8.76612e+06	9.28182e+07	2.67203e+07	-0.0125234	1.10877	0.464625	1.57996e+08	1.4366e+08	1.48139e+08	1.37366e+08	2.05942e+08	1.97212e+08	-0.0607654	0.156408	0.124265	7.39368e+07	7.68907e+07	8.34042e+07	12.8	103	4.89	20.7	6.2	5.05	0.22	1.2	0.318	17.7
Q6NWL9	Pdlim7 protein OS=Danio rerio OX=7955 GN=pdlim7 PE=2 SV=1	pdlim7	2	5.88679e+06	6.80558e+06	8.17235e+06	3.94366e+06	2.67757e+06	4.09864e+06	0	0	2.35067e+06	950727	0	4.01406e+06	4.27301e+06	2.87227e+06	2.12398e+06	6.38567e+06	6.9217e+06	7.43532e+06	7.07243e+06	3.04939e+06	4.22305e+06	0.0443623	-0.356	-0.245674	738542	678216	1.48772e+06	1.47328e+06	3.35856e+06	6.17851e+06	0.299909	0.694785	0.618364	3.91571e+06	3.46562e+06	2.62064e+06	7.59	43.3	46.6	64.5	19.7	-1.45	0.22	3.79	0.0766	-7.14
X1WC76	Si:dkey-108k21.24 (Fragment) OS=Danio rerio OX=7955 GN=si:dkey-108k21.24 PE=3 SV=1	si:dkey-108k21.24	4	2.63975e+07	9.56817e+07	3.72537e+08	136878298	884564016	238434287	1.87268e+08	636308694	856324504	2.409e+08	1.34105e+09	1.51208e+08	497124434	379669492	3.81693e+08	1.1194e+08	9.75227e+07	3.32523e+08	2.26559e+08	1.05203e+09	2.47344e+08	0.306196	1.03292	-0.12852	1.75672e+08	3.69503e+08	4.58732e+08	3.66651e+08	9.0712e+08	2.36883e+08	0.319549	0.390047	-0.287026	4.4509e+08	3.81915e+08	4.2127e+08	72.9	92.5	43.2	70.6	7.67	2.82	0.219	1.5	0.548	1.85
E7F4K4	Kinesin family member 1Aa OS=Danio rerio OX=7955 GN=kif1aa PE=3 SV=2	kif1aa	1	2.72253e+06	1.07733e+07	2.78883e+06	0	2.13382e+06	1.16792e+06	380873	0	0	1.01679e+06	0	2.99929e+06	0	1.33754e+06	855942	2.94894e+06	1.09681e+07	2.54718e+06	2.48785e+06	2.43062e+06	1.2015e+06	-0.0738419	-0.654414	-0.326334	363665	156342	580987	1.40202e+06	3.03491e+06	4.38949e+06	0.586052	1.28807	0.878248	791765	1.34357e+06	920657	86.6	35.6	57.9	50.8	28.3	-2.69	0.219	8.02	0.0149	-15
A0A0R4IGV9	Paralemmin 2 OS=Danio rerio OX=7955 GN=palm2 PE=4 SV=1	palm2	9	4.01335e+07	4.24446e+07	4.35116e+07	4.02357e+07	8.88738e+07	34860578	9.23262e+07	1.57815e+08	1.44384e+08	7.72165e+07	1.65306e+08	2.13247e+07	76045289	6.68671e+07	7.4225e+07	4.7278e+07	4.61028e+07	3.66442e+07	6.41301e+07	1.1079e+08	4.47586e+07	0.132403	0.380772	0.0868708	8.38673e+07	9.77073e+07	7.74873e+07	1.12583e+08	1.18133e+08	7.78991e+07	0.127882	0.082445	0.0023016	7.23903e+07	7.26857e+07	8.12661e+07	13.5	46.4	12	21.2	6.68	1.69	0.217	1.19	0.351	1.99
Q0PWB8	PDZ and LIM domain 3b OS=Danio rerio OX=7955 GN=pdlim3b PE=2 SV=1	pdlim3b	10	57143773	78752287	5.28868e+07	1.53175e+08	5.95462e+07	2.01413e+08	2.66846e+07	3.25263e+07	4.33681e+07	3.4487e+07	7.04706e+07	1.56436e+08	9.35801e+07	8.69363e+07	5.42433e+07	6.80855e+07	8.0831e+07	7.27514e+07	3.21146e+08	6.8983e+07	2.08532e+08	0.673648	-0.0688356	0.457331	2.67736e+07	2.54327e+07	2.72441e+07	6.52281e+07	6.14733e+07	2.42293e+08	0.386728	0.383293	0.949068	8.69525e+07	7.6297e+07	6.66767e+07	8.73	63.3	3.55	84	13.2	2.7	0.216	4.64	0.0981	-2.79
B8JMC1	Biliverdin reductase B OS=Danio rerio OX=7955 GN=blvrb PE=1 SV=1	blvrb	2	1.15558e+06	1.82322e+06	2654626	3.31191e+06	50874188	3.51027e+06	6.02042e+06	14614401	27406874	1.45463e+07	2.75462e+07	5.84362e+06	1.15953e+07	1.1701e+07	1.05313e+07	1.42699e+06	2.1917e+06	3.18846e+06	5.00055e+06	5.92856e+07	3.61434e+06	0.544595	1.43217	0.0544491	5.70324e+06	9.31229e+06	1.61053e+07	2.09977e+07	1.98904e+07	8.54945e+06	0.56605	0.329587	-0.27503	1.05763e+07	1.17592e+07	1.14379e+07	38.9	140	50.9	41.8	5.43	9.97	0.215	1.59	0.318	4.57
F1RBH3	MICOS complex subunit OS=Danio rerio OX=7955 GN=chchd6b PE=1 SV=1	chchd6b	8	12623913	0	0	0	3.81619e+07	6.34892e+06	6.11787e+07	8.95897e+07	9.05919e+07	3.05124e+07	1.01615e+08	5.63707e+06	4.09023e+07	42571319	3.28227e+07	4.02682e+06	3.26848e+06	3.91647e+06	3.50548e+06	1.30601e+07	9.16451e+06	-0.0602149	0.6016	0.369214	4.89525e+07	5.59663e+07	5.31047e+07	4.47456e+07	5.75103e+07	3.38907e+07	-0.0390244	0.0118192	-0.195052	4.65376e+07	4.45304e+07	3.80585e+07	11	56	6.7	26.1	10.3	2.29	0.215	-1.16	0.381	14.1
Q90474	Heat shock protein HSP 90-alpha 1 OS=Danio rerio OX=7955 GN=hsp90a.1 PE=1 SV=3	hsp90a.1	11	32078999	4.6754e+07	9.17171e+07	2.80201e+07	80646739	4.65777e+07	6.67105e+07	1.03076e+08	1.19015e+08	3.57626e+07	9.33643e+07	2.83261e+07	8.54453e+07	6.31748e+07	6.54557e+07	2.99514e+07	5.06997e+07	5.97254e+07	7.2539e+07	8.58758e+07	4.82729e+07	0.384154	0.228866	-0.0924556	6.50333e+07	7.14347e+07	5.76081e+07	4.57108e+07	7.46635e+07	4.6919e+07	-0.153117	0.0191986	-0.0891344	7.93149e+07	6.53391e+07	7.30376e+07	32.6	27.7	10.7	29.4	9.65	1.47	0.215	-1.16	0.401	1.38
A4IGF7	Zgc:162944 protein OS=Danio rerio OX=7955 GN=zgc:162944 PE=2 SV=1	zgc:162944	2	1.98131e+06	1.49246e+06	7.18236e+06	1.02105e+06	5.06239e+06	1.89378e+06	5.33819e+06	1.72796e+07	17932782	4.89695e+06	2.64431e+06	1.65103e+06	2.41897e+06	7.61138e+06	8.04878e+06	2.75421e+06	2.15379e+06	2.5485e+06	2.30984e+06	1.85036e+06	2.26101e+06	-0.0764143	-0.0659462	-0.0519817	1.05616e+07	1.09164e+07	1.06488e+07	6.89625e+06	2.07301e+06	2.51348e+06	-0.185116	-0.721479	-0.627025	1.10442e+07	7.64838e+06	8.73258e+06	12.3	11.8	1.73	69.7	19	-1.16	0.215	-2.8	0.0872	4.31
F1QPC0	Vitellogenin 3, phosvitinless (Fragment) OS=Danio rerio OX=7955 GN=vtg3 PE=1 SV=2	vtg3	2	0	0	0	0	3.34404e+06	0	1.07756e+06	5.03315e+06	3645531	575150	1.43258e+06	0	886677	619556	860573	619539	872209	910907	1.34764e+06	3.80582e+06	915501	0.337504	0.639828	0.00218456	2.05011e+06	3.29842e+06	2.28458e+06	1.38783e+06	1.27342e+06	819342	-0.16944	-0.413332	-0.445341	1.05691e+06	1.50291e+06	1.93936e+06	19.8	77.1	26.1	25.9	29.4	2.53	0.214	-2.19	0.0228	3.18
Q6PBY1	40S ribosomal protein S3a OS=Danio rerio OX=7955 GN=rps3a PE=2 SV=3	rps3a	7	2.34834e+07	3.3841e+07	2.75883e+07	4.75409e+06	7.2851e+07	2.69957e+07	3.37488e+07	6.11438e+07	95680331	1.72524e+09	52603074	9.48377e+06	3.85646e+07	2.84866e+07	4.03585e+07	3.22465e+07	3.66261e+07	1.43726e+07	4.50442e+07	6.3657e+07	3.03072e+07	0.145157	0.240056	0.324009	4.53484e+07	3.84688e+07	5.57072e+07	2.81692e+09	3.83207e+07	4.25093e+07	1.79321	-0.00167508	-0.117427	3.57105e+07	3.35253e+07	4.75447e+07	42.5	36.1	18.7	166	19.4	1.67	0.214	20.8	0.46	1.68
F1QJT6	Double-stranded RNA-binding protein Staufen homolog 2 OS=Danio rerio OX=7955 GN=stau2 PE=4 SV=1	stau2	20	3.01142e+08	2.74533e+08	1.56636e+08	6.78114e+07	1.54314e+07	2.66411e+08	5.64722e+06	2.62465e+07	2.09642e+07	9.99122e+06	1.74345e+07	1.998e+08	7.19701e+07	1.05155e+08	6.56163e+07	3.37227e+08	2.85831e+08	1.4753e+08	1.34237e+08	1.12566e+08	2.21551e+08	-0.400052	-0.404703	0.176594	1.27962e+07	2.49053e+07	1.77111e+07	2.03204e+07	3.9624e+07	8.4101e+07	0.200851	0.201667	0.676555	8.54363e+07	9.27322e+07	8.29024e+07	38.2	37	33	68.1	5.86	-1.65	0.214	2.6	0.17	-13.9
A7Y3Y2	Sodium channel protein OS=Danio rerio OX=7955 GN=scn12ab PE=2 SV=1	scn5lab	18	3.93785e+07	30565063	1.13084e+08	1.20466e+08	2.38216e+08	5.815e+07	2.65493e+08	4.40014e+08	4.73576e+08	7.89093e+07	3.39897e+08	90461027	2.26271e+08	1.61753e+08	1.22155e+08	4.97475e+07	3.8899e+07	1.21079e+08	2.2052e+08	9.47853e+07	8.6512e+07	0.646677	0.386803	-0.145993	2.73056e+08	2.47542e+08	2.676e+08	1.2537e+08	2.08454e+08	2.17823e+08	-0.338058	-0.074639	-0.0893825	2.08029e+08	1.66137e+08	1.37311e+08	63.9	56.1	5.11	27.7	20.9	1.92	0.211	-1.43	0.158	3.76
F1R9Y8	High density lipoprotein-binding protein a OS=Danio rerio OX=7955 GN=hdlbpa PE=1 SV=1	hdlbpa	3	3601713	3.46051e+06	5.64148e+06	2.27291e+06	4.23061e+06	6.30297e+06	0	819909	5.06704e+06	468516	3.14658e+06	5.18443e+06	3152057	1.59213e+06	1.79461e+06	4.51022e+06	4.66996e+06	5.16327e+06	5.53301e+06	4.80923e+06	6.49267e+06	0.0887636	0.0127625	0.0994982	2.1219e+06	2.12249e+06	3.17967e+06	2.72243e+06	2.475e+06	7.48934e+06	0.108231	0.0667299	0.372061	4.18116e+06	2.48563e+06	2.80603e+06	7.12	15	24.7	66.8	28.5	1.17	0.211	1.71	0.361	-1.93
Q6PC06	Adenosylhomocysteinase OS=Danio rerio OX=7955 GN=ahcyl2 PE=1 SV=1	ahcyl2	4	2.07709e+06	1.98336e+06	1.7198e+06	0	27774019	1.70599e+06	2.17958e+07	2.75456e+07	3.53306e+07	13364581	2.93574e+07	3.22436e+06	1.60343e+07	19041422	9.36569e+06	3.25241e+06	3.09437e+06	3.23226e+06	1.05961e+07	1.82705e+07	3.07865e+06	0.512942	0.771178	-0.0211453	2.05967e+07	1.74254e+07	2.09639e+07	1.9007e+07	2.13937e+07	1.41541e+07	-0.034883	0.0891037	-0.17059	1.46494e+07	1.91358e+07	1.21762e+07	2.69	71.3	9.9	20.3	23	3.33	0.207	-1.08	0.561	6.16
Q7T3G4	Phosphoglycerate mutase OS=Danio rerio OX=7955 GN=pgam2 PE=1 SV=1	pgam2	5	4.47652e+07	4.1292e+07	35593125	1.67462e+07	5.89759e+06	4.01924e+07	1.01827e+07	6.98742e+06	7.12405e+06	4117343	5.93392e+06	1.81167e+07	1.51959e+07	2.7208e+07	2.10243e+07	4.91218e+07	4.23993e+07	2.73559e+07	2.83385e+07	8.98977e+06	2.84047e+07	-0.238897	-0.67361	0.0163391	1.02746e+07	5.02096e+06	5.11316e+06	7.003e+06	5.3091e+06	2.93354e+07	-0.16648	0.0242337	0.758702	2.90026e+07	2.81287e+07	2.40951e+07	28.1	51.1	44.2	96.6	9.67	-1.81	0.207	2.04	0.479	-5.82
Q6NUT4	Pabpn1 protein OS=Danio rerio OX=7955 GN=pabpn1 PE=1 SV=1	pabpn1	1	12505738	11828895	18591262	16807756	6.53499e+07	15931899	14427191	2.28612e+07	0	5.5634e+06	21213842	2.42817e+07	2.43735e+07	16294840	2.08112e+07	1.36576e+07	1.20441e+07	1.67847e+07	2.7125e+07	7.67513e+07	1.64772e+07	0.297995	0.804313	-0.00803043	1.35964e+07	1.41018e+07	1.00281e+07	7.98009e+06	1.51913e+07	3.74859e+07	-0.231417	0.032322	0.572648	2.20471e+07	1.63813e+07	2.27691e+07	17	80.2	17.7	76.1	17.1	2.83	0.201	1.61	0.592	-1.13
Q803X5	AMP deaminase OS=Danio rerio OX=7955 GN=ampd3b PE=2 SV=1	ampd3b	10	64355830	6.28917e+07	5.60071e+07	7.00892e+07	6.41418e+07	7.59593e+07	3.1854e+07	4.05123e+07	5.50501e+07	2.63655e+07	5.04469e+07	6.58395e+07	6.23184e+07	5.86728e+07	4.66202e+07	7.11169e+07	6.85349e+07	5.6397e+07	1.71641e+08	7.44361e+07	8.79921e+07	0.382647	0.0358718	0.193188	3.14086e+07	3.17519e+07	3.38349e+07	4.11477e+07	3.85291e+07	1.1472e+08	0.117297	0.0840189	0.530275	5.55462e+07	6.34306e+07	5.21811e+07	12	47.3	4.06	66.7	10.1	1.7	0.201	2	0.253	-2.02
A1L1W3	Phosphodiesterase OS=Danio rerio OX=7955 GN=pde8a PE=2 SV=1	pde8a	2	0	0	0	0	0	0	1.11476e+06	5052818	2.34752e+06	0	0	0	0	0	0	1.52686e+06	714514	1.6647e+06	1.1712e+06	567337	405054	-0.115166	-0.10017	-0.613823	1.42389e+06	3.31867e+06	1.58573e+06	539609	327870	1.2838e+06	-0.421396	-1.00526	-0.0917311	855704	838279	1.08415e+06	39.4	56.5	49.8	70	14.8	-1.82	0.2	-2.94	0.0813	1.62
A0A0R4IBT5	Uncharacterized protein OS=Danio rerio OX=7955 GN=actc1c PE=1 SV=1	actc1c	4	6.37545e+07	204840478	255077320	82315488	16900429	289693085	8.45438e+07	225481523	34678780	117514555	728080104	9.82089e+07	2.17262e+08	2.00722e+08	2.26666e+08	7.16466e+07	7.38299e+07	2.27642e+08	2.37059e+08	1.46003e+08	2.89607e+08	0.51966	0.296128	0.104558	8.07155e+07	1.3121e+08	2.0441e+07	1.81609e+08	4.8809e+08	1.56201e+08	0.35218	0.570535	0.883182	1.94974e+08	2.02567e+08	2.58006e+08	71.9	32.4	71.6	67.1	15.7	1.8	0.198	3.55	0.116	-1.61
E7F851	Family with sequence similarity 120A OS=Danio rerio OX=7955 GN=fam120a PE=4 SV=2	fam120a	1	0	0	3808181	3.39539e+06	0	3.27207e+06	0	0	0	0	0	1.6528e+06	0	1.23164e+06	0	848641	238901	3.47159e+06	5.23318e+06	3.22237e+06	3.37321e+06	0.790042	1.12996	-0.0124843	221436	171065	659266	353988	199982	2.38236e+06	0.20374	0.0678296	0.557947	824446	1.23715e+06	548127	113	28.4	76.6	124	39.9	2.59	0.195	2.79	0.509	-4.33
A7MBS2	Tubulin alpha chain OS=Danio rerio OX=7955 GN=tuba1c PE=2 SV=1	tuba1c	15	1.34372e+08	91538929	2.80464e+08	8.77711e+07	6.34417e+08	2.12237e+08	3.56939e+08	5.18508e+08	862620031	2.98036e+08	6.06041e+08	134996412	3.58685e+08	3.44218e+08	3.03719e+08	1.504e+08	1.37027e+08	2.19286e+08	2.35383e+08	7.40251e+08	2.2746e+08	0.194527	0.732573	0.015894	3.36365e+08	3.2304e+08	4.78019e+08	4.37092e+08	4.25353e+08	2.86502e+08	0.113761	0.119494	-0.222318	3.25198e+08	3.4951e+08	3.34936e+08	26.1	73.3	22.7	21.9	3.64	2.37	0.195	1.01	0.966	2.24
Q566W6	Cold-inducible RNA-binding protein a OS=Danio rerio OX=7955 GN=cirbpa PE=1 SV=1	cirbpa	3	1.03989e+07	9.05458e+06	5.26014e+06	0	7.26331e+06	2.41722e+07	9.80415e+06	0	0	9.37525e+06	0	994953	610158	9.4759e+06	8838989	1.2121e+07	1.02876e+07	5.43036e+06	3.17406e+07	8.53555e+06	2.53427e+07	0.418075	-0.0810803	0.669024	1.91679e+06	2.24957e+06	1.6378e+06	1.46029e+07	4.78231e+06	2.89427e+06	0.881866	0.327538	0.247278	8.29028e+06	1.06557e+07	1.14556e+07	37.3	54.8	15.8	84.6	16.2	2.36	0.194	3.84	0.14	-4.8
Q6NWC3	Ribosomal protein S2 OS=Danio rerio OX=7955 GN=rps2 PE=1 SV=1	rps2	3	0	1.11136e+06	7.35649e+06	0	1.87075e+07	0	17170235	25032015	40093632	1.72768e+07	29890568	3.00919e+06	6.5896e+06	5.85736e+06	13267801	1.8382e+06	2.04363e+06	2.30496e+06	353369	1.31129e+06	1.41207e+06	-0.716164	-0.192703	-0.212808	1.91293e+07	1.58575e+07	2.35449e+07	1.95065e+07	2.17047e+07	8.93868e+06	0.0084808	0.136319	-0.420624	7.26503e+06	6.82833e+06	5.17265e+06	11.3	57	19.8	40.8	17.2	-2.01	0.194	-1.17	0.54	9.46
Q4ZGL2	Cypher/ZASP splice variant 1 zeta OS=Danio rerio OX=7955 GN=ldb3a PE=1 SV=1	ldb3a	2	3.39545e+06	4.23486e+06	5.75882e+06	3.08301e+06	2.99839e+06	3.635e+06	2.90497e+06	6.8255e+06	6.50921e+06	945851	2.90869e+06	4439286	4855978	3.45196e+06	5.0382e+06	4.71251e+06	4.77506e+06	6.16003e+06	4.87681e+06	3.40537e+06	4.35502e+06	0.0148833	-0.146815	-0.150592	3.73091e+06	5.35268e+06	4.04863e+06	1.47079e+06	2.46556e+06	6.70097e+06	-0.404265	-0.336656	0.21883	4.90969e+06	3.77576e+06	5.85186e+06	15.7	17.7	19.6	78.3	21.5	-1.24	0.192	-1.23	0.465	-1.19
A8KBY7	Phosphoglycerate mutase OS=Danio rerio OX=7955 GN=bpgm PE=2 SV=1	bpgm	1	804163	1.20599e+06	1.17607e+06	0	0	0	0	0	0	0	0	0	500247	0	729681	865333	1.22483e+06	1.07984e+06	1.07171e+06	145108	223079	0.092894	-0.926384	-0.684902	194955	309499	424588	205043	329937	782188	0.0219107	0.027772	0.265343	462990	452990	784182	17.1	107	37.1	69.2	33.2	-2.2	0.192	1.42	0.628	-3.41
A0A0R4IW20	Synaptosomal-associated protein OS=Danio rerio OX=7955 GN=snap23.1 PE=1 SV=1	snap23.1	18	1.68634e+08	172349445	1.53882e+08	2.43579e+08	5.48103e+08	1.25238e+08	4.06697e+08	6.48541e+08	5.47726e+08	3.00356e+08	7.3446e+08	1.89593e+08	393279921	3.22933e+08	3.33144e+08	2.07678e+08	1.82263e+08	1.47787e+08	4.31975e+08	3.12392e+08	1.78529e+08	0.318068	0.234002	0.0820718	4.03726e+08	3.93365e+08	3.19175e+08	4.50077e+08	4.47782e+08	6.80751e+08	0.0472002	0.0562716	0.328959	3.69377e+08	3.4921e+08	3.68671e+08	16.8	41.2	12.4	25.4	3.16	1.72	0.191	1.41	0.124	2.08
A0AUR8	Zgc:154056 OS=Danio rerio OX=7955 GN=dars PE=2 SV=1	dars	3	1367999	3.14401e+06	0	2.72454e+06	1.05723e+07	1.52999e+06	5.98867e+06	9.3949e+06	9.37766e+06	4.21897e+06	1.2328e+07	2.83376e+06	6.37451e+06	4.26574e+06	4.65165e+06	2.51084e+06	3.57741e+06	3.45852e+06	4.19807e+06	1.21105e+07	4.41817e+06	0.223231	0.529593	0.106352	5.6841e+06	6.12979e+06	8.12096e+06	1.46384e+07	9.11116e+06	6.71065e+06	0.410831	0.172128	-0.0828433	5.84561e+06	4.94976e+06	5.23249e+06	18.4	65.2	19.5	40	8.57	2.17	0.188	1.53	0.228	2.09
A7MCR1	Cytochrome b-c1 complex subunit Rieske, mitochondrial OS=Danio rerio OX=7955 GN=uqcrfs1 PE=1 SV=1	uqcrfs1	4	7.0818e+07	63695252	7.85883e+07	43739124	4.33659e+07	34223289	58586888	121794554	122116308	3.46378e+07	101250161	57554678	6.84929e+07	60889140	44482850	7.87852e+07	6.58207e+07	7.09991e+07	7.28072e+07	3.62804e+07	3.67635e+07	-0.0342703	-0.258691	-0.285836	7.38256e+07	7.42861e+07	6.94005e+07	5.09875e+07	7.19346e+07	1.19021e+08	-0.160743	-0.0139699	0.23426	6.2701e+07	6.22378e+07	5.99707e+07	9.08	43.1	3.72	43.2	2.37	-1.48	0.188	1.11	0.87	1.01
A0A0R4IF18	ARVCF, delta catenin family member b OS=Danio rerio OX=7955 GN=arvcfb PE=1 SV=1	arvcfb	63	2.87383e+08	2.97508e+08	3.46149e+08	3.03672e+08	3.45261e+09	3.74218e+08	2.32239e+09	4.26463e+09	3.90875e+09	1.57968e+09	5.56466e+09	3.32816e+08	2.18305e+09	1835009930	1.78507e+09	3.45091e+08	3.09633e+08	4.1314e+08	7.40516e+08	2.92176e+09	4.87647e+08	0.331601	0.974796	0.0720087	2.19903e+09	2.52175e+09	2.11925e+09	2.44692e+09	3.73721e+09	1.50801e+09	0.0463881	0.170846	-0.147778	1.96887e+09	1.85054e+09	1.97145e+09	14.8	96.7	9.35	43.6	3.58	3.89	0.187	1.12	0.859	6.41
P0C8S0	Small membrane A-kinase anchor protein OS=Danio rerio OX=7955 PE=3 SV=1	P0C8S0	2	2.83899e+06	0	0	0	1.3968e+07	0	1.55411e+07	40716358	23345128	10586523	30434777	0	11092370	4942973	1.20671e+07	3.97424e+06	1.03856e+06	1.02747e+06	764087	885857	477940	-0.716111	-0.0690673	-0.332397	1.46785e+07	2.51988e+07	1.37895e+07	1.51679e+07	2.19382e+07	1.57964e+07	0.0142449	-0.0601794	0.059008	1.01209e+07	8.68203e+06	1.31155e+07	84.3	29.5	35.5	21.2	21.3	-2.84	0.187	-1.01	0.967	8.88
Q9PTR4	Alpha-cardiac actin OS=Danio rerio OX=7955 GN=actc1a PE=2 SV=1	actc1a	9	3.32722e+08	5.22746e+08	5.56756e+08	2.74029e+08	819293727	6.19672e+08	3.6663e+08	8.45199e+08	8.02419e+08	2.53437e+08	1.22061e+09	3.41334e+08	6.2084e+08	5.71084e+08	5.31875e+08	3.74846e+08	5.20345e+08	5.04742e+08	4.76891e+08	9.44087e+08	6.82595e+08	0.104567	0.258721	0.131094	3.44665e+08	4.82688e+08	4.26973e+08	3.88564e+08	8.22421e+08	5.6269e+08	0.0520656	0.231428	0.119869	5.55572e+08	5.78848e+08	5.90898e+08	17.1	33.4	16.6	36.9	3.12	1.5	0.186	1.41	0.29	-1.12
F1QM37	Acetyl-CoA carboxylase beta OS=Danio rerio OX=7955 GN=acacb PE=1 SV=2	acacb	136	7.13529e+09	1.00861e+10	8.83656e+09	3.21442e+09	8.03946e+09	4.65673e+09	7.31596e+09	1.02983e+10	1.09937e+10	3.41239e+09	8.96861e+09	3.94111e+09	7.77896e+09	6.965e+09	6.49087e+09	7.89768e+09	1.03084e+10	7.65074e+09	5.56238e+09	8.56373e+09	4.86044e+09	-0.152239	-0.0805268	-0.197027	6.91934e+09	6.05867e+09	6.02691e+09	5.06324e+09	6.15363e+09	6.84767e+09	-0.135636	0.00675391	0.0554482	6.96557e+09	7.05941e+09	7.15639e+09	17	31.1	7.99	14.9	1.35	-1.36	0.186	-1.05	0.61	-1.36
F1R0H8	Dystrophin OS=Danio rerio OX=7955 GN=dmd PE=1 SV=1	dmd	1	148057264	292016544	113840264	6.91241e+07	9.21922e+07	61137592	103641848	136717152	269687232	35977920	130498384	6.00026e+07	185024864	9.64056e+07	133051616	1.63863e+08	2.98385e+08	1.01647e+08	1.16186e+08	1.0861e+08	6.3403e+07	-0.149325	-0.438907	-0.204985	9.69833e+07	8.01404e+07	1.43916e+08	5.3893e+07	9.01497e+07	9.47963e+07	-0.255164	0.051113	-0.181316	1.65376e+08	9.69721e+07	1.47017e+08	53.5	29.7	30.9	28.1	25.9	-1.96	0.186	-1.34	0.302	-1.76
E7FDX8	Solute carrier family 12 (potassium/chloride transporter), member 7b OS=Danio rerio OX=7955 GN=slc12a7b PE=4 SV=2	slc12a7b	47	6.10011e+07	4.20289e+07	8.51823e+07	1.34123e+08	1.95637e+09	2.72304e+07	1.81094e+09	2.78476e+09	1.92409e+09	8.29131e+08	2.01944e+09	9.12059e+07	9.00873e+08	9.03856e+08	8.59425e+08	8.54349e+07	6.01947e+07	1.10883e+08	3.29891e+08	1.08959e+09	9.56758e+07	0.586735	1.25771	-0.0640626	1.71247e+09	1.64286e+09	1.07966e+09	1.19838e+09	1.40184e+09	1.26221e+09	-0.155027	-0.0689017	0.0678469	8.80886e+08	8.87694e+08	9.46654e+08	29.6	103	23.5	8.08	4	5.91	0.185	-1.15	0.507	17.3
F8W3V3	ARVCF, delta catenin family member b (Fragment) OS=Danio rerio OX=7955 GN=arvcfb PE=1 SV=1	arvcfb	1	13586638	9.01329e+06	9702214	0	117769470	1.63962e+07	74941007	150024100	176749416	50113884	180627484	10083416	70439989	61373304	7.08089e+07	1.48447e+07	9.17448e+06	8.7943e+06	2.33365e+07	1.39046e+08	1.69584e+07	0.196465	1.18058	0.285184	7.02082e+07	8.7708e+07	9.56186e+07	7.5648e+07	1.23979e+08	1.52212e+07	0.0324096	0.150309	-0.798092	6.3319e+07	6.1725e+07	7.79782e+07	31	115	15.4	76.1	13.2	5.47	0.185	-1.18	0.534	7.73
Q5BKW5	Ribosomal protein L12 OS=Danio rerio OX=7955 GN=rpl12 PE=2 SV=1	rpl12	3	6785043	7.11039e+06	0	0	4.09188e+07	9353111	0	45528246	3.93158e+07	0	33481384	0	1.08407e+07	10361646	3.97993e+06	8.32604e+06	8.55699e+06	1.1785e+07	2.90841e+07	4.75178e+07	9.64509e+06	0.543218	0.744535	-0.0870224	3.99336e+07	2.80967e+07	2.2969e+07	2.24762e+06	9.43475e+06	1.19729e+06	-1.24962	-0.473924	-1.28294	9.91334e+06	1.04118e+07	1.24222e+07	20.2	65.9	28.7	104	12.2	3.01	0.185	-7.07	0.0552	3.17
E7EXC4	Serpin peptidase inhibitor, clade B (ovalbumin), member 14 OS=Danio rerio OX=7955 GN=serpinb14 PE=1 SV=2	serpinb14	13	6.50756e+07	6.31211e+07	5.16868e+07	5.85109e+07	1.47782e+08	5.09495e+07	7.53983e+07	1.63596e+08	1.42691e+08	6.68677e+07	1.06042e+08	5.4864e+07	7.07741e+07	8.57662e+07	7.21546e+07	7.39433e+07	6.23736e+07	5.0184e+07	1.71008e+08	1.40126e+08	6.07152e+07	0.364117	0.351517	0.0827326	7.82866e+07	9.69929e+07	8.47551e+07	9.1947e+07	7.8966e+07	8.41407e+07	0.0698501	-0.0892999	-0.00315965	7.94972e+07	8.18621e+07	8.04281e+07	19.1	45.9	11	7.69	1.48	1.99	0.185	-1.02	0.833	1.39
F1Q7Q9	Family with sequence similarity 131, member C OS=Danio rerio OX=7955 GN=fam131c PE=4 SV=1	fam131c	3	0	0	0	0	9.33821e+06	0	1.98734e+07	16252424	2.07412e+07	1.21751e+06	8302637	0	3.23199e+06	4.2764e+06	6.64797e+06	1.90729e+06	2.49359e+06	1.24282e+06	675025	1.27388e+06	1.49393e+06	-0.451096	-0.291695	0.0799223	1.87686e+07	1.64765e+07	1.26069e+07	2.13718e+06	6.8719e+06	3.19352e+06	-0.94359	-0.379788	-0.596339	4.9819e+06	4.81556e+06	8.04859e+06	33.3	36.9	19.5	61.1	30.6	-1.64	0.185	-3.92	0.0386	8.48
E7FDX9	Kinesin family member 26Ba OS=Danio rerio OX=7955 GN=kif26ba PE=3 SV=1	kif26ba	8	22616266	24293454	0	2.08911e+06	30420263	0	1.16611e+07	2.52196e+07	2.34186e+07	2.30008e+06	2.25997e+07	2.37747e+06	6.74121e+06	6.79983e+06	4.66202e+06	2.87577e+07	2.81128e+07	1.75431e+07	8.40552e+06	2.48522e+07	7.42962e+06	-0.534189	-0.0535391	-0.373139	1.59531e+07	1.72113e+07	1.38727e+07	5.98682e+06	1.76069e+07	9.1227e+06	-0.425648	0.0098702	-0.182037	8.74005e+06	8.92106e+06	8.09963e+06	25.4	72.2	10.8	55.1	5.03	-1.83	0.185	-1.44	0.279	-1.58
Q6P0G4	Add3a protein OS=Danio rerio OX=7955 GN=add3a PE=2 SV=1	add3a	1	0	0	2.42647e+06	0	5805723	0	0	0	0	3.68972e+06	0	0	0	7.4024e+06	10505257	608003	421688	2.2181e+06	126456	686567	218164	-0.681966	0.211691	-1.0072	661878	116127	737477	257472	223747	469223	-0.410048	0.284825	-0.196369	1.35781e+07	7.4398e+06	1.14517e+07	91.2	87.4	67.1	42	28.8	-3.15	0.185	-1.59	0.73	-2.14
A0A0G2KUX6	Uncharacterized protein OS=Danio rerio OX=7955 PE=4 SV=1	A0A0G2KUX6	2	1.92079e+06	1941766	984403	0	5.99994e+06	0	2.4915e+07	3.3483e+07	2.97275e+07	6.00671e+06	4.20545e+07	0	1.78215e+07	1.08715e+07	8.77102e+06	2.6008e+06	2.38439e+06	908539	709379	1.5867e+06	463074	-0.564229	-0.176882	-0.292693	2.34761e+07	2.07297e+07	1.73153e+07	8.55502e+06	2.99874e+07	2.34663e+07	-0.438404	0.160344	0.132014	1.61996e+07	1.09261e+07	9.53284e+06	46.9	64.2	15.1	53.2	28.8	-2.14	0.184	1.01	0.8	10.4
A0A140LG98	Sorbin and SH3 domain-containing 1 (Fragment) OS=Danio rerio OX=7955 GN=sorbs1 PE=4 SV=1	sorbs1	1	9.64675e+07	132934116	116862994	50874820	2.82529e+07	81755714	13777907	19151148	8428881	5.17076e+06	0	54973855	5.58697e+07	50684153	54909031	1.0652e+08	1.35715e+08	1.04329e+08	8.47616e+07	3.29344e+07	8.48351e+07	-0.0992302	-0.614978	-0.0898309	1.29867e+07	1.18731e+07	5.03164e+06	7.40429e+06	4.52297e+07	8.66577e+07	-0.244015	0.580862	1.2361	5.02904e+07	5.09715e+07	6.03865e+07	15.2	44.4	43.2	85.4	10.5	-1.71	0.183	4.66	0.238	-11.6
A8E5E5	Annexin OS=Danio rerio OX=7955 GN=anxa3b PE=2 SV=1	anxa3b	2	0	0	0	0	1.93678e+06	724139	0	1.855e+06	4.80065e+06	1.11454e+06	3.43891e+06	0	1.95478e+06	850514	0	666114	449779	1.45162e+06	2.80694e+06	2.19075e+06	827431	0.624685	0.687595	-0.24412	801891	1.25279e+06	2.98456e+06	1.51565e+06	2.588e+06	990855	0.276484	0.315085	-0.47887	1.80206e+06	1.44367e+06	2.07999e+06	61.6	52.2	68.6	47.9	18	2.27	0.182	1.01	0.865	1.96
A0A0G2L6C1	Uncharacterized protein OS=Danio rerio OX=7955 PE=3 SV=1	smyhc2	1	1.59078e+07	11679277	7.55813e+06	1.47552e+06	3.61181e+06	10187676	0	7.51303e+06	3.33914e+06	0	1.55095e+06	4.40416e+06	3.13461e+06	5.94209e+06	2.79812e+06	1.73956e+07	1.18916e+07	6.86131e+06	2.2203e+06	4.13359e+06	1.05268e+07	-0.894028	-0.458911	0.185891	2.07957e+06	4.78376e+06	2.05392e+06	2.76376e+06	1.16967e+06	6.50908e+06	0.123527	-0.611708	0.500935	2.86992e+06	5.9717e+06	3.02876e+06	43.7	77.3	52.8	78.7	44.1	-2.14	0.18	1.17	0.987	-4.05
F1Q7T3	Solute carrier family 16 (monocarboxylate transporter), member 3 OS=Danio rerio OX=7955 GN=slc16a3 PE=4 SV=1	slc16a3	28	3.40873e+07	3.60749e+07	8.65922e+07	1.27511e+08	1.6957e+09	6.78253e+07	3.00748e+09	4.15912e+09	3.76261e+09	8.24981e+08	2327201304	7.83951e+08	1.63028e+09	1.22939e+09	1.42044e+09	4.85674e+07	4.03105e+07	8.8497e+07	2.27868e+08	1.50092e+09	8.15762e+07	0.671339	1.57094	-0.0353654	2.80512e+09	2.37408e+09	1.95784e+09	1.23684e+09	1.59411e+09	2.03812e+09	-0.355638	-0.172977	0.0174505	1.46018e+09	1.5514e+09	1.57189e+09	43.6	129	17.8	24.7	3.89	10.2	0.179	-1.47	0.0987	40.2
Q6PBW3	Ribosomal protein S14 OS=Danio rerio OX=7955 GN=rps14 PE=1 SV=1	rps14	5	19350854	20620883	2.84394e+07	29796333	1.12693e+08	29136957	40061881	9.31463e+07	132971089	40114244	1.40234e+08	2.75639e+07	7.6246e+07	4.9183e+07	5.35935e+07	2.22662e+07	2.69226e+07	2.65549e+07	4.8144e+07	1.13881e+08	3.03039e+07	0.334896	0.626334	0.0573542	3.84164e+07	5.82896e+07	7.042e+07	5.88826e+07	8.72689e+07	4.37058e+07	0.18547	0.175268	-0.207156	6.90799e+07	6.0849e+07	5.84806e+07	10.3	68.7	29	34.9	8.86	2.54	0.179	1.14	0.684	2.21
Q7T3B1	Proteasome (Prosome, macropain) 26S subunit, ATPase 2 OS=Danio rerio OX=7955 GN=psmc2 PE=1 SV=1	psmc2	3	2.96237e+06	2606604	3.53766e+06	1.62473e+06	6.64469e+06	2.47143e+06	5.84207e+06	8.58904e+06	7.46226e+06	2.47633e+06	8.97673e+06	2.78418e+06	3.48356e+06	3.79341e+06	2.31425e+06	4.66245e+06	3.26483e+06	4.26078e+06	3.98967e+06	7.57275e+06	7.44005e+06	-0.0676778	0.365393	0.242086	5.54367e+06	5.61832e+06	4.62566e+06	4.22407e+06	6.68132e+06	6.02631e+06	-0.118066	0.0752559	0.114877	3.20592e+06	4.68049e+06	6.80135e+06	17.7	32.1	10.5	22.5	36.9	1.56	0.179	1.07	0.742	1.3
Q7ZUG5	40S ribosomal protein S21 OS=Danio rerio OX=7955 GN=rps21 PE=3 SV=1	rps21	2	0	1.02597e+06	0	0	1.91947e+07	0	1.99062e+06	2.00273e+07	2.21421e+07	7.23925e+06	4.85193e+06	1.05228e+06	3884696	2313486	9.94415e+06	1.34667e+06	1.72703e+06	999719	240631	1.01241e+06	726796	-0.747909	-0.231943	-0.138465	7.34671e+06	1.2613e+07	1.30814e+07	2.84691e+06	4.18438e+06	2.76249e+06	-0.41172	-0.479186	-0.675354	3.96949e+06	3.08641e+06	2.2976e+06	26.8	59.1	28.9	24.4	26.8	-2.06	0.178	-3.37	0.00829	8.11
A0A140LGX4	Obscurin, cytoskeletal calmodulin and titin-interacting RhoGEF b (Fragment) OS=Danio rerio OX=7955 GN=obscnb PE=4 SV=1	obscnb	1	5847321	7.73843e+06	6.33819e+06	2.60805e+06	1.4944e+06	5201239	0	5.23853e+06	6.55697e+06	531503	0	2.72864e+06	4.04982e+06	2.45709e+06	2.82616e+06	6.35977e+06	7.87549e+06	5.76003e+06	3.9893e+06	1.69685e+06	5.36706e+06	-0.202545	-0.666634	-0.0306883	4.47122e+06	3.36999e+06	3.94613e+06	721915	1.67481e+06	3.98376e+06	-0.79194	-0.303664	0.00412167	3.70225e+06	2.46864e+06	3.05927e+06	16.4	50.3	14	78.9	20.1	-1.81	0.177	-1.85	0.229	-1.7
F1QHC0	BCL2-interacting protein 2 OS=Danio rerio OX=7955 GN=bnip2 PE=1 SV=2	bnip2	3	0	0	0	0	5.30057e+06	0	3.39257e+06	8.49551e+06	1.00289e+07	2.13935e+06	8382072	0	2900483	2655281	2.3152e+06	1.06812e+06	647990	544262	1.7325e+06	7.18521e+06	1.02538e+06	0.210053	1.04487	0.275078	5.8909e+06	5.62606e+06	6.13422e+06	3.86634e+06	6.33048e+06	4.36783e+06	-0.182882	0.0512319	-0.147493	2.86359e+06	3.27337e+06	3.98198e+06	36.8	102	4.32	26.8	16.8	4.4	0.172	-1.21	0.284	7.81
Q6NVC4	Transaldolase OS=Danio rerio OX=7955 GN=taldo1 PE=2 SV=1	taldo1	1	1.88538e+06	1.0338e+06	2.21426e+06	621033	0	1226972	513540	739634	1.9366e+06	449419	6.95375e+06	278265	2.55796e+06	1671208	0	2.03814e+06	1.04977e+06	2.02524e+06	911524	993032	1.26238e+06	-0.349466	-0.0241325	-0.205286	489812	503127	1.2124e+06	608051	5.09077e+06	383254	0.093911	1.00511	-0.500158	2.34477e+06	1.67886e+06	2.93657e+06	33.3	17.4	56.2	131	27.1	-1.61	0.17	2.76	0.632	-2.32
F1RBK4	Catenin (cadherin-associated protein), delta 2b OS=Danio rerio OX=7955 GN=ctnnd2b PE=1 SV=2	ctnnd2b	10	2.81548e+07	3.41151e+07	258457107	175618335	1.54817e+08	216056419	1.43199e+08	2.38649e+08	1.52033e+08	1.49139e+08	1.7399e+08	239993871	1.33803e+08	1.77743e+08	2.55598e+08	3.6674e+07	3.87279e+07	2.22833e+08	3.22425e+08	1.62362e+08	2.27882e+08	0.944071	0.622459	0.00973079	1.41102e+08	1.4283e+08	8.88754e+07	2.34857e+08	1.2207e+08	4.01541e+08	0.221268	-0.0682115	0.654948	1.22794e+08	1.81358e+08	2.86801e+08	108	33.9	24.7	55.6	42.2	2.39	0.169	2.03	0.206	1.25
A4QP71	Nap1l4a protein OS=Danio rerio OX=7955 GN=nap1l4a PE=2 SV=1	nap1l4a	2	3.3398e+06	2.8813e+06	4.98343e+06	6.80782e+06	4.46261e+06	5.09234e+06	6.70184e+06	7.52356e+06	8.08334e+06	1983611	9.85536e+06	7.96092e+06	4532763	6.8047e+06	5.50117e+06	4.28206e+06	3.39037e+06	4.5544e+06	1.05018e+07	5.08594e+06	5.24775e+06	0.389613	0.176124	0.0615416	6.34723e+06	4.88589e+06	4.92938e+06	1.77109e+07	7.26272e+06	1.17357e+07	0.445657	0.172156	0.376716	6.94892e+06	6.83747e+06	5.95691e+06	14.9	44.4	15.4	42.8	8.26	1.7	0.169	2.27	0.0853	1.32
Q4KME6	GRB10-interacting GYF protein 2 OS=Danio rerio OX=7955 GN=gigyf2 PE=2 SV=2	gigyf2	4	9.74715e+06	9.48897e+06	4.14157e+06	5.27053e+06	0	9.52035e+06	0	1.97365e+06	6.18397e+06	3.01658e+06	1192840	8.28238e+06	2.24641e+06	1.00183e+06	4322980	1.05599e+07	9.64514e+06	1.49179e+07	8.99809e+06	6.4081e+06	1.01009e+07	-0.0695114	-0.177579	-0.169348	5.19397e+06	3.01187e+06	4.47915e+06	5.1157e+06	3.29471e+06	1.22681e+07	-0.00659468	0.0389811	0.437581	3.08381e+06	2.66662e+06	5.24311e+06	24.1	22.3	26.3	68.8	37.7	-1.38	0.169	1.63	0.459	-2.77
A0A0R4ITA7	Interferon regulatory factor 2-binding protein 2-B OS=Danio rerio OX=7955 GN=irf2bp2b PE=1 SV=1	irf2bp2b	1	129993	512959	0	0	0	864133	0	0	0	0	0	0	0	0	0	138513	520479	284078	1.17105e+06	317953	888440	0.927086	-0.21404	0.495191	246240	599681	151384	188906	682377	582442	-0.115114	0.0561039	0.585174	716136	273029	664469	61.3	54.8	71.1	53.8	44	2.52	0.168	1.46	0.518	1.06
Q1LVF0	Laminin subunit gamma-1 OS=Danio rerio OX=7955 GN=lamc1 PE=2 SV=2	lamc1	2	0	0	822273	0	3.39366e+06	0	905491	1.18317e+06	8.3058e+06	0	0	0	1.53741e+06	1.55447e+06	1.32743e+06	491435	1.13774e+06	1.70854e+06	1.75357e+06	3.86391e+06	1.53041e+06	0.552457	0.530984	-0.0478166	1.00424e+06	1.25704e+06	5.06337e+06	681200	1.07343e+06	1.42262e+06	-0.168563	-0.0685762	-0.551351	1.6785e+06	2.17055e+06	2.13595e+06	54.7	54	93.1	35	13.8	2.14	0.168	-2.31	0.359	2.19
E9QD58	Misshapen-like kinase 1 OS=Danio rerio OX=7955 GN=mink1 PE=1 SV=2	mink1	4	0	0	650125	0	3.40018e+06	1.65619e+06	9.21893e+06	10483916	1.56484e+07	2.50506e+06	1.0555e+07	2.18257e+06	7.58373e+06	3182145	5.7638e+06	1.80645e+06	1.27695e+06	2.07253e+06	2.13119e+06	5.77596e+06	2.54497e+06	0.0717955	0.655449	0.0891824	8.90514e+06	7.53921e+06	9.54516e+06	3.93755e+06	7.86451e+06	7.92768e+06	-0.354415	0.0183458	-0.0806371	7.59925e+06	6.00749e+06	6.2186e+06	23.6	57.3	11.8	34.8	13.1	2.03	0.167	-1.32	0.3	5.04
Q6IQM2	Cytochrome c OS=Danio rerio OX=7955 GN=cyc PE=3 SV=3	cyc	1	2857371	3990266	3247009	1.95783e+06	1.97308e+06	2777448	3.19452e+06	7.7379e+06	4.55667e+06	959435	4.02685e+06	2.10479e+06	4.87039e+06	3.64838e+06	4501054	3.09581e+06	4.05796e+06	2.9629e+06	2.97011e+06	2.24596e+06	2.86235e+06	-0.0180023	-0.256907	-0.0149943	3.02694e+06	4.9228e+06	2.77479e+06	1.32116e+06	2.98007e+06	3.05265e+06	-0.36005	-0.217986	0.0414477	4.44756e+06	3.66599e+06	4.88443e+06	17.7	14.5	32.8	40	14.2	-1.25	0.167	-1.46	0.288	1.06
K7DY29	Carnitine palmitoyltransferase 1Ab (liver) OS=Danio rerio OX=7955 GN=cpt1ab PE=1 SV=1	cpt1ab	5	2.63442e+07	2.6785e+07	2.62633e+07	4.52271e+06	2.06709e+07	2.13185e+06	3.03744e+07	7.40685e+07	5.00381e+07	3.37748e+06	2.10095e+07	2234154	29263563	29810137	15665958	2.92904e+07	2.79904e+07	2.48599e+07	9.28265e+06	2.37254e+07	4.81462e+06	-0.499052	-0.0717949	-0.712938	2.86917e+07	4.57417e+07	2.96878e+07	5.05626e+06	1.5663e+07	1.13286e+07	-0.753927	-0.465436	-0.418401	2.94483e+07	2.99623e+07	1.69712e+07	8.32	78.4	27.6	49.9	28.9	-2.17	0.166	-3.25	0.0475	1.27
E7F1F3	Proline-rich basic protein 1 OS=Danio rerio OX=7955 GN=prob1 PE=4 SV=1	prob1	1	2.85108e+06	3.78537e+06	2321695	0	0	2.20353e+06	0	0	588032	0	0	2.55639e+06	1.16156e+06	1.33894e+06	1.01501e+06	3.08895e+06	3.84937e+06	2.12289e+06	632324	180575	2.26983e+06	-0.688872	-1.32873	0.0290642	383182	1.17048e+06	382606	592699	180804	3.72607e+06	0.189429	-0.811156	0.9885	1.06972e+06	1.34498e+06	1.09274e+06	28.6	107	70.5	129	13.1	-2.94	0.166	2.32	0.79	-4.68
Q6P6E7	Ribosomal protein S20 OS=Danio rerio OX=7955 GN=rps20 PE=2 SV=1	rps20	3	29669338	43302133	5.25051e+07	3.79691e+07	1.23524e+08	52047852	7.23222e+07	1.38719e+08	1.46344e+08	7.04385e+07	1.25481e+08	4.93455e+07	1.02828e+08	85020881	7.17552e+07	3.76026e+07	4.43754e+07	3.98375e+07	6.14717e+07	1.4479e+08	5.38825e+07	0.213458	0.513596	0.131155	6.80121e+07	8.3623e+07	8.21629e+07	1.04683e+08	8.83429e+07	7.60105e+07	0.187288	0.0238458	-0.033802	9.2636e+07	8.54938e+07	7.86637e+07	8.5	58.2	11.1	16	8.16	2.14	0.165	1.15	0.304	1.92
A0A0R4IP30	Sorbin and SH3 domain-containing 1 OS=Danio rerio OX=7955 GN=sorbs1 PE=1 SV=1	sorbs1	49	2.91418e+09	3.62852e+09	3.87404e+09	1.50672e+09	5.08044e+08	2.50288e+09	5.30516e+08	1.10137e+09	1.42143e+09	1.78355e+08	1.01787e+09	1.6737e+09	2.04367e+09	1.76481e+09	1.66295e+09	3.25861e+09	3.70984e+09	3.39136e+09	2.55723e+09	1.15489e+09	2.55936e+09	-0.105263	-0.506816	-0.122242	5.3412e+08	6.799e+08	7.92013e+08	3.72061e+08	7.2252e+08	2.60242e+09	-0.157024	0.0264046	0.516645	1.91796e+09	1.77755e+09	1.82051e+09	6.72	38.8	19.3	97.3	3.91	-1.65	0.165	1.84	0.658	-5.16
F1QZ37	EH-domain-containing 4 (Fragment) OS=Danio rerio OX=7955 GN=ehd4 PE=1 SV=2	ehd4	32	2.19777e+07	2.73887e+07	3.14388e+07	4.56563e+07	7.22649e+08	5.56085e+07	371816369	6.31377e+08	5.70127e+08	3.46629e+08	7.70643e+08	50011227	3.01298e+08	2.95577e+08	3.06038e+08	3.51133e+07	4.49659e+07	3.69679e+07	8.35254e+07	4.35309e+08	6.87254e+07	0.376348	0.985914	0.269293	3.55985e+08	3.88082e+08	3.25622e+08	5.00942e+08	5.04055e+08	2.94764e+08	0.148356	0.113554	-0.0432381	2.93503e+08	3.09402e+08	3.30534e+08	13.4	106	8.76	27.7	5.97	5.02	0.164	1.22	0.448	9.14
A0A1L6UW63	Tropomyosin 1-1 OS=Danio rerio OX=7955 GN=tpm1 PE=2 SV=1	tpm1	1	0	0	0	0	0	5.17232e+06	0	0	0	0	0	0	0	0	0	452893	283386	245855	534636	1.31822e+06	405674	0.0720622	0.667608	0.217499	126863	483746	258699	408742	531562	875102	0.508115	0.0409365	0.529264	822230	196194	913872	33.7	65.6	62.3	39.9	60.6	2.3	0.164	2.09	0.155	-1.13
Q6P5L8	Hydroxysteroid dehydrogenase-like protein 2 OS=Danio rerio OX=7955 GN=hsdl2 PE=2 SV=1	hsdl2	9	5.98957e+07	6.81312e+07	4.71487e+07	3.51351e+07	5.21837e+07	1.03847e+07	1.12468e+08	1.32967e+08	1.10024e+08	2.06565e+07	6.24774e+07	2.13852e+07	56198058	6.29516e+07	5.09329e+07	6.63973e+07	7.38039e+07	5.75887e+07	5.82676e+07	5.50462e+07	5.58149e+07	-0.0567235	-0.127352	-0.0135872	1.08127e+08	8.26384e+07	6.45921e+07	4.78432e+07	4.66304e+07	9.55851e+07	-0.354115	-0.248513	0.170211	5.14023e+07	6.37559e+07	5.65789e+07	12.3	2.98	25.7	44.1	10.8	-1.17	0.163	-1.34	0.31	1.29
F1QRM9	Aminopeptidase OS=Danio rerio OX=7955 GN=npepps PE=1 SV=1	npepps	2	253073664	248244504	392789672	153954192	2.98059e+07	35577988	184346784	0	1.07925e+08	56128216	221353460	136694712	117972152	246879968	344924384	2.81496e+08	2.54015e+08	3.48956e+08	2.64939e+08	3.47057e+07	3.70712e+07	-0.0263256	-0.864458	-0.973734	1.72751e+08	1.27927e+08	5.95685e+07	8.51332e+07	1.51442e+08	2.21415e+08	-0.307322	0.073283	0.57019	1.05936e+08	2.49157e+08	3.83311e+08	16.6	118	47.5	44.6	56.4	-2.63	0.163	1.27	0.574	-2.46
A0A286YA82	Eukaryotic translation initiation factor 4 gamma, 3b OS=Danio rerio OX=7955 GN=eif4g3b PE=1 SV=1	eif4g3b	2	3301983	6.38671e+06	1.00254e+07	0	0	4.62492e+06	2.21277e+06	2.13931e+06	1.85974e+06	2.66956e+06	2.22506e+06	6.13053e+06	2.78423e+06	3461843	1.89717e+06	4.4376e+06	6.49546e+06	9.10522e+06	563106	2.00508e+06	4.76773e+06	-0.896558	-0.510478	-0.280979	2.10448e+06	1.43796e+06	1.74997e+06	3.7242e+06	1.68876e+06	9.03891e+06	0.247889	0.0698219	0.713085	2.56066e+06	3.47781e+06	2.04235e+06	35	87.4	18.9	78.8	27	-2.73	0.163	2.73	0.241	-3.79
A0A0R4IVE2	Ubiquitin-specific peptidase 10 OS=Danio rerio OX=7955 GN=usp10 PE=1 SV=1	usp10	3	974666	3.16908e+06	1.66026e+08	163826640	1.21087e+08	1.58862e+08	177388112	182025408	173564784	2.09522e+08	185579099	160737071	157584489	1.47264e+08	154850370	1.3573e+07	4.27795e+06	1.48304e+08	2.95207e+08	1.43908e+08	1.59759e+08	1.33745	1.52685	0.0323136	1.66468e+08	1.07525e+08	9.58372e+07	3.27132e+08	1.27909e+08	2.53833e+08	0.293393	0.0753927	0.423014	1.41819e+08	1.48535e+08	1.7158e+08	146	41.7	30.7	42.6	10.1	3.6	0.162	1.92	0.152	2.23
Q803B0	Heat shock 60 protein 1 OS=Danio rerio OX=7955 GN=hspd1 PE=1 SV=1	hspd1	2	0	0	0	0	1.75626e+07	979318	1.24057e+06	1.15965e+07	9.9649e+06	1.43269e+06	3.86693e+06	0	1.34195e+06	1.69893e+06	6.05773e+06	1.12776e+06	844104	906985	6.39006e+06	2.45225e+06	1.21947e+06	0.753288	0.463169	0.12857	5.91609e+06	7.43613e+06	6.03175e+06	1.96194e+06	2.88192e+06	6.28518e+06	-0.47935	-0.411666	0.0178747	2.97082e+06	1.70637e+06	6.56891e+06	15.5	80.5	13.1	61.4	67.3	3.5	0.161	-1.74	0.185	6.73
E7FD91	DEAD (Asp-Glu-Ala-Asp) box helicase 6 OS=Danio rerio OX=7955 GN=ddx6 PE=1 SV=2	ddx6	1	0	0	0	0	1.09738e+06	0	0	0	1.54901e+06	0	0	0	0	0	0	170370	820336	173806	1.072e+06	1.24261e+06	486839	0.798801	0.180344	0.447321	1.09138e+06	143716	976778	337067	107512	849973	-0.510259	-0.12605	-0.0603904	554001	230928	202012	96.4	42.4	70.2	88.1	59.4	2.41	0.16	-1.71	0.58	1.9
U3JAM7	Synaptopodin 2-like b OS=Danio rerio OX=7955 GN=synpo2lb PE=4 SV=1	synpo2lb	35	1.75935e+09	2.10607e+09	2.06618e+09	9.91539e+08	1.38613e+08	1.3387e+09	7.57589e+07	1.59598e+08	2.60548e+08	5.33572e+07	1.39449e+08	8.48948e+08	8.14802e+08	7.48192e+08	6.53189e+08	1.9406e+09	2.14975e+09	1.83721e+09	1.65913e+09	7.67096e+08	1.3549e+09	-0.0680567	-0.447537	-0.132251	9.62458e+07	1.09913e+08	1.39279e+08	1.85266e+08	1.88629e+08	1.14487e+09	0.284413	0.234559	0.914872	7.37259e+08	7.55159e+08	7.3145e+08	8.06	36	19.1	109	1.67	-1.57	0.16	4.4	0.207	-17.2
E7FC94	Si:ch211-200p22.4 OS=Danio rerio OX=7955 GN=si:ch211-200p22.4 PE=1 SV=2	si:ch211-200p22.4	2	0	0	0	0	2.51416e+06	787294	3.51159e+06	5.68227e+06	4.31802e+06	611928	5.59189e+06	0	2.69876e+06	2.53873e+06	1.34571e+06	700343	963675	611027	1.1483e+06	2.85502e+06	999250	0.214743	0.471679	0.213614	3.33452e+06	3.71941e+06	2.69375e+06	1.04195e+06	4.16511e+06	4.30739e+06	-0.505184	0.0491532	0.203857	2.77085e+06	2.84176e+06	2.21923e+06	24.2	61.8	15.9	58.2	13.1	2.2	0.159	-1.02	0.722	4.28
F1QA42	Ataxin 2-like OS=Danio rerio OX=7955 GN=atxn2l PE=1 SV=1	atxn2l	1	1366521	0	0	1.81115e+06	0	1.83484e+06	0	0	0	0	0	1.58217e+06	0	0	0	1.47468e+06	258462	561128	2.74145e+06	1.01256e+06	1.88934e+06	0.269283	0.593023	0.527248	702051	122028	756200	220708	144792	2.27801e+06	-0.502551	0.0742861	0.47892	248109	351081	203257	82.8	46	66.7	137	28.3	2.46	0.158	1.67	0.972	-1.45
A0A0R4IDB7	Non-specific serine/threonine protein kinase OS=Danio rerio OX=7955 GN=cdc42bpaa PE=1 SV=1	cdc42bpaa	12	5074604	3.13205e+06	1.42244e+07	13337599	4.82572e+07	6.4727e+06	31981871	7.43912e+07	77783102	2.2148e+07	6.52561e+07	1.59873e+07	3.50894e+07	1.96255e+07	2.6064e+07	1.09646e+07	8.2096e+06	9.9969e+06	3.08982e+07	3.12554e+07	1.02681e+07	0.44994	0.580602	0.0116261	4.31288e+07	4.79882e+07	4.70454e+07	3.32923e+07	4.44828e+07	5.37543e+07	-0.112424	-0.0329424	0.0578964	3.42352e+07	2.59375e+07	3.21754e+07	14.4	49.8	5.6	23.4	14	2.48	0.157	-1.05	0.681	4.74
Q6DGJ6	Peroxiredoxin 2 OS=Danio rerio OX=7955 GN=prdx2 PE=1 SV=1	prdx2	2	4.84229e+06	3508888	3.36175e+06	4090272	10348389	4.42326e+06	0	5.86994e+06	1.14458e+07	3.98195e+06	5.28645e+06	4.03096e+06	5.35584e+06	3.81314e+06	5317695	5.56272e+06	4.43196e+06	3.30806e+06	6.46366e+06	6.08551e+06	5.41039e+06	0.065191	0.137701	0.213655	5.57413e+06	4.49467e+06	6.91307e+06	5.57976e+06	4.06325e+06	6.1287e+06	0.000438305	-0.0438246	-0.0523031	4.90643e+06	4.97664e+06	5.75446e+06	25.4	8.91	21.4	20.3	9.03	1.35	0.157	-1.08	0.698	1.28
A0A0R4IJ71	Plectin b OS=Danio rerio OX=7955 GN=plecb PE=1 SV=1	plecb	66	2.71379e+08	2.25327e+08	2.31455e+08	2.27644e+08	1.9377e+08	242032396	7.52823e+07	3.02453e+08	6.75893e+08	4.48073e+07	1.0487e+08	8.48381e+07	1.6956e+08	2.34615e+08	1.41372e+08	2.32028e+08	2.32971e+08	2.04665e+08	4.48124e+08	2.79563e+08	2.63594e+08	0.285858	0.0791778	0.109892	2.14884e+08	2.08494e+08	3.5356e+08	9.51533e+07	1.09063e+08	1.6527e+08	-0.353781	-0.281415	-0.330268	1.92751e+08	2.50178e+08	1.70986e+08	7.2	30.9	31.7	30.1	20	1.48	0.155	-2.1	0.036	1.16
E7EYG1	Obscurin, cytoskeletal calmodulin and titin-interacting RhoGEF b OS=Danio rerio OX=7955 GN=obscnb PE=1 SV=2	obscnb	12	3.05399e+07	5.60072e+07	4.93937e+09	8.06798e+09	2.60609e+09	3.99197e+09	4.3803e+09	4.35564e+09	3972728442	2687190081	5.49231e+09	7.18166e+09	5.42886e+09	4.8188e+09	4.31378e+09	4.71432e+07	1.79036e+08	4.31535e+09	1.55817e+10	3.18056e+09	4.17425e+09	2.5192	1.24956	-0.0144381	4.0559e+09	2.31653e+09	1.94852e+09	4.43935e+09	3.52768e+09	1.27948e+10	0.0392323	0.182651	0.817327	4.75894e+09	4.84281e+09	4.8582e+09	160	90.1	40.6	73.8	1.11	5.05	0.154	2.5	0.173	1.83
A0A0R4II85	Pleckstrin homology domain-containing, family A member 7a OS=Danio rerio OX=7955 GN=plekha7a PE=4 SV=1	plekha7a	21	1.97671e+08	2.07244e+08	2.46918e+08	2.59932e+08	3.66516e+08	2.34209e+08	2.50951e+08	697182653	5.48382e+08	1.18993e+08	8.45666e+08	2.38002e+08	3.68139e+08	3.34068e+08	3.26158e+08	2.32268e+08	2.15065e+08	2.28786e+08	4.83372e+08	3.58832e+08	2.45409e+08	0.318292	0.222321	0.0304602	2.72078e+08	4.18741e+08	3.02334e+08	1.8891e+08	5.00609e+08	4.25052e+08	-0.158439	0.0775531	0.147954	3.31475e+08	3.3741e+08	3.60746e+08	4.04	32.8	23.4	43.8	4.51	1.61	0.153	1.12	0.886	1.47
Q29RC5	Rac family small GTPase 1b OS=Danio rerio OX=7955 GN=rac1b PE=2 SV=1	rac1b	2	0	0	1.56648e+06	0	32752472	3.34958e+06	14586252	2.87557e+07	3.2764e+07	1.73801e+07	53825374	0	14241514	1.40753e+07	1.60654e+07	784942	1.94705e+06	1.95965e+06	2.88179e+06	3.02198e+07	3.97763e+06	0.564824	1.19091	0.307447	1.37747e+07	1.79064e+07	1.91097e+07	2.52676e+07	3.83178e+07	1.43017e+07	0.263483	0.330393	-0.125867	1.41228e+07	1.41479e+07	1.75116e+07	43.1	125	16.5	46.3	12.8	7.9	0.152	1.53	0.336	10.8
Q6P124	GTPase-activating protein (SH3 domain)-binding protein 1 OS=Danio rerio OX=7955 GN=g3bp1 PE=1 SV=1	g3bp1	13	68184625	1.18706e+08	3.95446e+09	4.25487e+09	2665858439	3.23617e+09	3.33547e+09	3.90995e+09	2.47287e+09	2.52462e+09	3.73304e+09	5.83625e+09	2946024744	3.86627e+09	4.02079e+09	7.51952e+07	1.23172e+08	3.44555e+09	8.01451e+09	3.34946e+09	3.38091e+09	2.02769	1.43446	-0.00822537	3.08775e+09	2.08995e+09	1.23341e+09	4.17765e+09	2.42373e+09	1.01094e+10	0.131289	0.0643473	0.913618	2.59322e+09	3.91162e+09	4.52581e+09	159	54.6	43.4	72.3	26.9	4.05	0.152	2.61	0.172	1.76
F1QFC0	Heat shock protein 9 OS=Danio rerio OX=7955 GN=hspa9 PE=1 SV=1	hspa9	30	1.29112e+08	1.1994e+08	1.11519e+08	1.32068e+08	9.43393e+08	1.44277e+08	1.36987e+08	3.00255e+08	5.00856e+08	2.4929e+08	442166341	92901402	2.32146e+08	2.57388e+08	2.4744e+08	1.59788e+08	1.41537e+08	1.29083e+08	5.00229e+08	8.16555e+08	1.68957e+08	0.495624	0.761116	0.116909	1.59394e+08	1.84322e+08	2.57196e+08	3.7773e+08	2.99249e+08	2.80791e+08	0.37471	0.210455	0.0381193	2.26212e+08	2.54341e+08	2.56222e+08	10.8	65.4	25.4	16.1	6.84	3.45	0.15	1.59	0.0563	1.4
A0A0R4IHT0	Solute carrier family 25 (aspartate/glutamate carrier), member 12 OS=Danio rerio OX=7955 GN=slc25a12 PE=1 SV=1	slc25a12	25	6.99482e+07	9.17915e+07	7.62755e+07	5.60604e+07	136541713	5.25362e+07	2.30601e+08	5.31437e+08	416763197	7.75628e+07	1.19201e+08	6.04484e+07	1.72849e+08	1.69514e+08	1.31043e+08	8.00774e+07	1.10236e+08	8.986e+07	1.41455e+08	1.53191e+08	9.56858e+07	0.247109	0.14291	0.0272808	2.2651e+08	3.19877e+08	2.45125e+08	1.03998e+08	9.45359e+07	9.49899e+07	-0.338061	-0.529386	-0.41171	1.61123e+08	1.7955e+08	1.64459e+08	16.5	23.4	18.7	5.45	5.83	1.39	0.15	-2.7	0.00711	2.83
B8A5F6	Novel protein similar to vertebrate sorbin and SH3 domain containing 2 (SORBS2) OS=Danio rerio OX=7955 GN=sorbs2b PE=4 SV=1	sorbs2b	3	39620196	5.28936e+07	5.37887e+07	2.31878e+07	1.23395e+07	3.05063e+07	9.82751e+06	2.17481e+07	1.9711e+07	6.25157e+06	1.57157e+07	3.29026e+07	25516691	2.50961e+07	25938845	4.33541e+07	5.38997e+07	4.8479e+07	3.71216e+07	1.49879e+07	3.15434e+07	-0.0674038	-0.555846	-0.186645	9.62401e+06	1.36736e+07	1.16659e+07	9.11343e+06	1.14704e+07	5.11086e+07	-0.0236744	-0.0763016	0.641575	2.31655e+07	2.52265e+07	2.8974e+07	10.9	41.3	17.4	98.7	11.4	-1.74	0.15	2.05	0.524	-4.17
E7F4G2	SET-binding factor 2 OS=Danio rerio OX=7955 GN=sbf2 PE=1 SV=1	sbf2	8	2.5606e+06	3.36263e+06	292577648	437376704	1.62563e+08	250620912	2.60052e+08	2.45117e+08	2.43056e+08	1.61795e+08	2.85413e+08	4.70678e+08	2.75815e+08	2.76596e+08	2.46709e+08	6.46366e+06	5.71421e+06	2.62702e+08	7.78878e+08	1.85942e+08	2.63542e+08	2.08099	1.51242	0.0013866	2.4674e+08	1.43763e+08	1.32778e+08	2.49396e+08	1.96328e+08	7.9115e+08	0.00465074	0.135337	0.775131	2.48996e+08	2.79595e+08	2.74846e+08	162	78.7	36	79.8	6.15	4.47	0.149	2.36	0.24	1.9
Q7T1J9	Ribosomal protein S10 OS=Danio rerio OX=7955 GN=rps10 PE=1 SV=1	rps10	2	3.73964e+06	9.97503e+06	15645096	6.92054e+06	1.07222e+07	18369024	8.19923e+06	17848175	22309704	1.08809e+07	20928953	12087997	11665262	1.28906e+07	1.13816e+07	8.16436e+06	1.01472e+07	1.4191e+07	3.3637e+07	1.23158e+07	1.89766e+07	0.614895	0.0841143	0.126204	7.7619e+06	1.13074e+07	1.31964e+07	1.56014e+07	1.51977e+07	1.80109e+07	0.303194	0.128414	0.135082	1.06408e+07	1.29551e+07	1.23665e+07	28.4	50.4	25.7	9.35	10	2	0.149	1.51	0.0979	-1.01
F8W3K6	Exosome component 2 OS=Danio rerio OX=7955 GN=exosc2 PE=1 SV=1	exosc2	1	2.88908e+06	3.38247e+06	2.30778e+06	0	0	2.0676e+06	0	0	0	0	0	2777287	0	0	0	3.13035e+06	3.43923e+06	2.11025e+06	151000	370912	2.12953e+06	-1.31662	-0.967189	0.00394919	985113	269396	289756	102511	127986	4.05661e+06	-0.982716	-0.32323	1.14613	906604	279058	936107	24	123	79.2	159	52.5	-3.27	0.149	2.78	0.93	-5.62
Q696W0	Striated muscle preferentially expressed protein kinase OS=Danio rerio OX=7955 GN=speg PE=2 SV=1	speg	100	3.26625e+08	2.35898e+08	5.96914e+08	5.9198e+08	1.66214e+09	4.09919e+08	1.88142e+09	2.77542e+09	2.58467e+09	6.39957e+08	2.5609e+09	4.10517e+08	1.30174e+09	1.21039e+09	1.15642e+09	3.99669e+08	3.61418e+08	4.19599e+08	1.21925e+09	5.99869e+08	5.10299e+08	0.484393	0.220047	0.0849904	1.70598e+09	1.71315e+09	1.45979e+09	9.54515e+08	1.48978e+09	1.51864e+09	-0.25219	-0.060675	0.0171634	1.30776e+09	1.27626e+09	1.30879e+09	7.51	49.7	8.87	24	1.43	1.97	0.148	-1.23	0.27	4.13
F1QV15	Vitellogenin 6 (Fragment) OS=Danio rerio OX=7955 GN=vtg6 PE=1 SV=1	vtg6	8	1.61121e+07	1.15987e+07	7.3582e+06	3.55657e+06	141609242	1.60061e+07	74337531	244040110	2.03088e+08	4.35332e+07	1.494e+08	5.60811e+06	6.67114e+07	8.18493e+07	6.71415e+07	1.91975e+07	1.49352e+07	9.67107e+06	8.21337e+07	1.66509e+08	1.74313e+07	0.631277	1.04723	0.255856	7.18757e+07	1.46798e+08	1.11687e+08	6.45093e+07	1.06858e+08	5.19284e+07	-0.0469596	-0.137911	-0.332596	6.17858e+07	8.35231e+07	7.53646e+07	32.7	84.3	34	38.7	14.9	6.07	0.147	-1.48	0.254	7.54
F1QH12	Acetyl-CoA carboxylase alpha OS=Danio rerio OX=7955 GN=acaca PE=1 SV=2	acaca	82	3.76663e+08	7.86745e+08	5.12523e+08	3.74648e+08	2.33851e+09	5.86744e+08	8.41962e+08	1.18477e+09	1.57205e+09	5.69643e+08	1.3437e+09	6.85922e+08	8.81431e+08	1.01629e+09	8.29906e+08	4.5651e+08	6.3845e+08	4.86001e+08	1.0139e+09	1.98646e+09	6.35894e+08	0.346543	0.492953	0.116747	7.77144e+08	7.65101e+08	8.5554e+08	8.58899e+08	9.43489e+08	1.26029e+09	0.0434406	0.0910178	0.168232	8.48841e+08	1.02693e+09	9.55843e+08	18.5	57.5	6.14	20.7	9.5	2.3	0.147	1.28	0.174	1.52
Q6NZV4	Cysteine and glycine-rich protein 1 OS=Danio rerio OX=7955 GN=csrp1a PE=1 SV=1	csrp1a	1	616955	1408370	653325	1.34262e+06	0	944824	0	0	0	0	0	0	1358895	0	651957	662936	1.43061e+06	602026	2.01483e+06	3.00526e+06	971577	0.482766	0.322359	0.207862	640832	288221	495404	470282	736955	246411	-0.134386	0.407716	-0.3033	1.2503e+06	857311	700232	51.4	50.9	37.3	50.7	30.3	2.22	0.147	1.02	0.957	-1.89
F6P4R0	Formin homology 2 domain-containing 3a OS=Danio rerio OX=7955 GN=fhod3a PE=4 SV=1	fhod3a	26	1.85673e+08	3.39934e+08	3.19389e+08	1.59861e+08	3.61122e+07	1.99067e+08	1.42517e+07	4.12977e+07	4.47784e+07	1.69516e+07	4.66759e+07	1.56645e+08	1.58691e+08	1.00654e+08	8.47578e+07	2.17673e+08	3.46829e+08	2.70944e+08	2.44084e+08	1.16639e+08	1.7369e+08	0.0497344	-0.473274	-0.193105	2.69154e+07	3.42774e+07	3.64939e+07	5.83734e+07	4.10309e+07	1.62828e+08	0.336214	0.0781027	0.649508	1.41858e+08	1.03537e+08	1.09159e+08	23.3	35.8	15.4	75.4	17.5	-1.56	0.147	2.68	0.182	-8.55
Q1JPS5	N-myc downstream regulated gene 4 OS=Danio rerio OX=7955 GN=ndrg4 PE=2 SV=1	ndrg4	1	0	0	0	96025.6	17502.3	183824	0	49349.6	160951	0	144976	0	67470.4	78190.1	0	333721	615002	267941	133573	19099.1	188402	-0.397666	-1.50786	-0.152953	108121	36263.3	109206	866486	114587	617019	0.90385	0.499667	0.75205	63187.7	78471.4	62995.6	45.5	76	49.5	71.9	13	-3.57	0.146	6.3	0.1	-4.8
A0A0R4IS68	Nucleophosmin 1a OS=Danio rerio OX=7955 GN=npm1a PE=1 SV=1	npm1a	1	3.11794e+08	2.75224e+08	1.96752e+06	1.12322e+06	599022	1.09113e+06	441314	0	0	467789	483831	0	0	1.11506e+06	0	3.46468e+08	2.81208e+08	1.80087e+06	1.67695e+06	674641	1.12235e+06	-2.31514	-2.61995	-0.205352	421152	517978	667347	633494	373397	390419	0.177303	-0.14214	-0.232821	315575	1.12002e+06	1.03407e+06	87.3	43.4	23.2	31.2	53.7	-181	0.146	-1.15	0.522	-392
Q6P3J7	EH-domain containing 2 OS=Danio rerio OX=7955 GN=ehd2b PE=1 SV=1	ehd2b	6	686205	0	0	3.42137e+06	3.90082e+07	3.75311e+06	5.03482e+07	3.86302e+07	6.34179e+07	21809662	33849598	2.17348e+06	2.4868e+07	1.94469e+07	1.96964e+07	2.68514e+06	2.13277e+06	3.18874e+06	5.78562e+06	2.43492e+07	4.57431e+06	0.333383	1.05754	0.156707	4.75271e+07	3.15228e+07	3.74768e+07	2.48607e+07	2.51389e+07	1.24175e+07	-0.281428	-0.0982785	-0.479727	2.27144e+07	2.46795e+07	2.13481e+07	19.8	95.8	20.8	34.9	7.31	4.34	0.145	-1.87	0.087	14.6
Q7ZTZ4	Fibrillarin OS=Danio rerio OX=7955 GN=fbl PE=1 SV=1	fbl	2	0	0	0	0	1.25886e+07	0	0	4576993	7.61154e+06	0	0	0	0	0	0	587687	518277	674449	663543	2.3025e+06	1.98851e+06	0.0527225	0.647638	0.469578	1.30434e+06	3.56295e+06	1.11651e+06	1.0598e+06	1.45886e+06	527161	-0.0901667	-0.387796	-0.325918	956624	820234	862705	13.2	52.7	68.3	46	7.93	2.78	0.145	-1.96	0.263	3.36
Q5U3K0	MICOS complex subunit OS=Danio rerio OX=7955 GN=chchd6b PE=2 SV=1	chchd6b	1	0	0	0	0	14797594	0	0	0	22026716	3.76697e+06	3.87568e+06	0	10433854	2.81788e+06	0	276372	210326	162749	442501	259745	280575	0.204419	0.091654	0.236532	219665	394919	138550	5.35459e+06	2.87037e+06	1.78797e+06	1.38696	0.861429	1.11075	9.48531e+06	2.83125e+06	5.25827e+06	26.4	30.5	52.2	54.8	57.5	1.51	0.145	13.3	0.00423	1.16
A0A0R4IA64	Eukaryotic translation elongation factor 1 delta a (guanine nucleotide exchange protein) OS=Danio rerio OX=7955 GN=eef1da PE=1 SV=1	eef1da	2	24408929	13518787	26437531	5382050	1.65573e+07	9779680	25755720	29734264	0	0	0	0	10587642	0	5241459	2.66537e+07	1.37581e+07	2.39179e+07	8.62179e+06	1.42969e+06	1.03509e+07	-0.49016	-0.983317	-0.363746	2.47528e+07	1.83596e+07	1.51167e+07	299638	834032	412913	-1.91703	-1.34268	-1.5636	519165	1.16231e+06	6.084e+06	31.7	69.6	25.3	54.6	118	-3.15	0.145	-37.7	0.00197	-1.1
A0A0R4IL92	Zgc:172302 (Fragment) OS=Danio rerio OX=7955 GN=zgc:172302 PE=4 SV=2	zgc:172302	3	2.54204e+08	1.9429e+08	4.58584e+10	5.02614e+10	5.19541e+10	5.07494e+10	44608838590	4.77906e+10	5.05095e+10	5.01114e+10	45995101387	4.74463e+10	5.26122e+10	3.95939e+10	3.06801e+10	2.82605e+08	1.99661e+08	3.94746e+10	1.02115e+11	6.47717e+10	5.33539e+10	2.55791	2.51109	0.130849	4.08429e+10	2.37071e+10	2.27572e+10	8.88094e+10	2.82921e+10	8.88853e+10	0.337342	0.0767879	0.591712	4.54851e+10	3.99041e+10	3.49001e+10	170	34.7	35	50.9	13.2	5.51	0.143	2.36	0.17	2.19
F1QBP1	Myozenin 2b OS=Danio rerio OX=7955 GN=myoz2b PE=4 SV=1	myoz2b	5	1.37194e+08	1.5734e+08	1.99628e+08	6.42133e+07	2.19304e+07	1.07998e+08	1.29397e+07	7.42135e+07	7.10299e+07	1.13798e+07	3.84784e+07	8.83209e+07	7.41976e+07	6.02991e+07	5.74664e+07	1.50509e+08	1.60392e+08	1.79282e+08	1.04136e+08	2.57407e+07	7.98262e+07	-0.15996	-0.794561	-0.35139	3.82614e+07	4.62664e+07	4.15895e+07	1.64828e+07	2.80573e+07	1.02925e+08	-0.365731	-0.217221	0.393536	6.72498e+07	6.14115e+07	6.30577e+07	8.95	57.4	9.57	95.5	4.71	-2.34	0.142	1.17	0.815	-3.89
Q5EI67	Carbamoyl-phosphate synthetase 2, aspartate transcarbamylase, and dihydroorotase OS=Danio rerio OX=7955 GN=cad PE=2 SV=1	cad	6	3496846	2.12876e+06	6092233	4.04576e+06	21673127	6.57331e+06	5.3829e+06	1.03695e+07	2.04276e+07	2.49458e+06	1.22218e+07	2.77745e+06	7.13108e+06	4.84818e+06	9.04146e+06	6.82088e+06	6.75316e+06	6.92069e+06	1.11468e+07	1.90248e+07	8.34337e+06	0.213309	0.449813	0.0811922	8.90051e+06	1.12934e+07	1.25396e+07	4.95353e+06	1.01369e+07	5.91505e+06	-0.2545	-0.0469172	-0.326325	9.08239e+06	8.18512e+06	9.75669e+06	1.23	43.1	16.9	39.4	8.75	1.88	0.141	-1.56	0.141	1.6
F1Q4X1	Collagen, type VI, alpha 3 OS=Danio rerio OX=7955 GN=col6a3 PE=1 SV=2	col6a3	18	1.89668e+07	1.01048e+07	3.70541e+06	0	1.20632e+07	2.32349e+06	4.98899e+06	17749708	186148748	1859916	0	0	1.15462e+07	4.33222e+06	1260717	2.65966e+07	1.78604e+07	2.12366e+07	1.17052e+07	1.82851e+07	6.75873e+06	-0.356447	0.0102046	-0.497219	3.28482e+07	2.71084e+07	6.68773e+07	1.15915e+07	9.15664e+06	5.66741e+06	-0.452373	-0.471367	-1.07189	1.67501e+07	1.13647e+07	1.38798e+07	20.1	47.2	50.8	33.8	19.3	-1.79	0.141	-4.8	0.0133	1.93
A2CKC9	Utrophin isoform G (Fragment) OS=Danio rerio OX=7955 GN=utrn PE=2 SV=1	utrn	1	0	0	0	0	7855644	0	0	0	0	2.51201e+06	0	0	0	3502495	5087202	379376	529386	260060	338948	96891.7	97170.5	-0.0489368	-0.737486	-0.42754	467451	200188	548488	3.53727e+06	423294	782544	0.878932	0.325205	0.154342	4.97315e+06	3.51936e+06	5.52411e+06	34.6	78.6	45	108	22.2	-2.19	0.141	3.9	0.237	1.04
E7F2X0	CAP-GLY domain-containing linker protein 1a OS=Danio rerio OX=7955 GN=clip1a PE=1 SV=2	clip1a	2	4.13167e+06	4.39451e+06	5.55575e+06	854155	0	2.37253e+06	687031	1.01644e+06	1.31067e+06	856829	0	1.80175e+06	2.18486e+06	1.5813e+06	1.37841e+06	4.46923e+06	4.46614e+06	5.07155e+06	1.48872e+06	331421	2.60376e+06	-0.477418	-1.12955	-0.28954	919789	1.31849e+06	1.06787e+06	1.52351e+06	673254	3.5411e+06	0.219157	-0.291897	0.520621	2.30397e+06	2.30037e+06	1.79916e+06	7.47	77.1	18.3	77	13.6	-3.17	0.141	1.74	0.55	-4.24
Q6PHK6	Transcriptional activator protein Pur-beta OS=Danio rerio OX=7955 GN=purb PE=2 SV=3	purb	1	0	0	2.65726e+06	2.59306e+06	1.4589e+06	4.45094e+06	0	1.25993e+06	1.66405e+06	0	2140470	2.73868e+06	569183	2.29284e+06	1.96846e+06	426526	207140	2.42772e+06	3.96571e+06	1.65619e+06	4.59139e+06	0.968375	0.902844	0.276745	768779	844132	1.04689e+06	4.13196e+06	1.60399e+06	3.9988e+06	0.730355	0.278792	0.582028	526391	2.30357e+06	2.12672e+06	120	45.4	16.2	43.8	59.3	3.34	0.139	3.66	0.0492	-1.15
E7F2M4	Phosphofurin acidic cluster sorting protein 2 OS=Danio rerio OX=7955 GN=pacs2 PE=4 SV=2	pacs2	12	6.44232e+06	3.61948e+06	1.21921e+07	1.34724e+07	8.2651e+07	1.22469e+07	8.76035e+07	198044295	173519870	37038602	1.13356e+08	1.72807e+07	5.85548e+07	6.05815e+07	6.14797e+07	1.18162e+07	7.87732e+06	1.52974e+07	2.51429e+07	6.204e+07	1.50127e+07	0.327936	0.896294	-0.00815977	8.32784e+07	1.23504e+08	1.02157e+08	5.32009e+07	8.25788e+07	9.47129e+07	-0.194614	-0.174811	-0.0328596	6.29195e+07	6.19482e+07	6.79268e+07	31.8	72.7	19.5	27.8	4.99	2.92	0.139	-1.34	0.223	8.83
B0F0D0	Calcium channel, voltage-dependent, beta 4a subunit OS=Danio rerio OX=7955 GN=cacnb4a PE=2 SV=1	cacnb4a	10	0	0	3.38813e+06	9846367	8.37191e+07	4.01845e+06	7.63387e+07	1.85923e+08	138202888	34174836	8.37984e+07	4.91599e+06	4.54621e+07	4.04077e+07	46960661	5.46646e+06	4.41753e+06	9.14952e+06	1.88987e+07	1.24695e+07	7.06007e+06	0.538726	0.45067	-0.112589	8.55169e+07	1.14866e+08	8.09891e+07	5.28147e+07	5.56785e+07	4.42282e+07	-0.209297	-0.314502	-0.262727	5.66946e+07	5.06853e+07	5.35431e+07	39.2	46.3	19.6	11.7	5.6	2.02	0.139	-1.84	0.0138	14.8
Q6P3J2	Rho GDP dissociation inhibitor (GDI) alpha OS=Danio rerio OX=7955 GN=arhgdia PE=1 SV=1	arhgdia	5	0	2556090	2.02846e+06	0	22220674	4.05874e+06	1.11308e+07	3.11894e+08	56770499	1.46338e+07	26281881	0	1.07759e+07	5.19987e+06	5.06242e+06	4.37527e+06	4.68873e+06	4.74852e+06	9.1732e+06	1.50982e+07	5.57022e+06	0.321516	0.507872	0.0693136	7.84294e+07	1.76183e+08	3.33852e+07	2.15668e+07	1.98564e+07	4.57315e+07	-0.560692	-0.948065	0.136662	1.0877e+07	7.1927e+06	7.57059e+06	4.35	48.4	76	49.8	23.7	2.16	0.138	-3.3	0.147	20.9
E9QC46	Calpastatin OS=Danio rerio OX=7955 GN=cast PE=1 SV=1	cast	9	6.26808e+07	7.26079e+07	60398231	5.7889e+07	1.10475e+08	6.70381e+07	1.0467e+08	1.63385e+08	164258089	5.67205e+07	1.541e+08	5.65253e+07	9.91185e+07	90522620	8.23305e+07	7.13731e+07	7.66071e+07	5.74684e+07	1.00488e+08	1.22014e+08	7.2403e+07	0.148578	0.202139	0.100327	9.9294e+07	9.92404e+07	9.26275e+07	8.4762e+07	1.09343e+08	1.11231e+08	-0.0687217	0.0421044	0.0794879	9.07947e+07	9.12773e+07	9.63173e+07	14.4	25.3	3.95	14.5	3.3	1.44	0.138	1.05	0.694	1.42
A0A0R4IN46	Transglutaminase 1-like 1 (Fragment) OS=Danio rerio OX=7955 GN=tgm1l1 PE=1 SV=1	tgm1l1	3	6.46914e+07	8.23802e+07	4.54526e+07	21743634	3.82301e+07	2.25671e+07	6.00991e+07	5.65872e+07	9.1755e+07	1.46407e+07	7.75821e+07	2.15638e+07	6.982e+07	5.23436e+07	3.12703e+07	7.16926e+07	8.42763e+07	4.118e+07	4.4509e+07	4.43751e+07	2.39166e+07	-0.207027	-0.278566	-0.235987	5.64437e+07	3.46841e+07	5.16892e+07	2.10994e+07	5.46205e+07	3.41198e+07	-0.427346	0.197225	-0.180393	6.29127e+07	5.26316e+07	3.41846e+07	33.7	31.5	24	46.2	29.2	-1.75	0.138	-1.3	0.386	-1.38
E7FC32	Tubulin beta chain OS=Danio rerio OX=7955 GN=tubb1 PE=1 SV=1	tubb1	3	0	0	0	0	17373611	928341	4986929	1.31982e+07	1.65768e+07	5.66977e+06	1.47909e+07	0	4.07568e+06	1.01423e+07	6.9942e+06	1.63817e+06	1.62314e+06	1.24465e+06	4.67772e+06	1.27115e+07	2.16148e+06	0.455674	0.89384	0.239703	6.45821e+06	8.52581e+06	1.0021e+07	7.93308e+06	1.08984e+07	1.06657e+07	0.0893296	0.106626	0.0270792	8.61718e+06	1.01915e+07	7.56489e+06	14.8	84.6	21.5	16.8	15	4.34	0.137	1.18	0.359	5.55
F1Q9R9	Hyperpolarization-activated cyclic nucleotide-gated potassium channel 2b (Fragment) OS=Danio rerio OX=7955 GN=hcn2b PE=4 SV=1	hcn2b	10	0	4.49468e+06	0	0	7.99758e+07	0	3.66197e+07	100682770	1.00939e+08	2.17426e+07	6.81896e+07	8.92092e+06	2.98657e+07	1.98581e+07	31404946	4.2651e+06	4.9386e+06	3.67619e+06	6.51963e+06	1.66842e+07	6.46122e+06	0.184294	0.528701	0.244917	4.52933e+07	5.81822e+07	4.8104e+07	3.281e+07	5.15378e+07	4.29e+07	-0.140027	-0.0526645	-0.0497238	2.88953e+07	2.87244e+07	3.49577e+07	14.7	59.5	13.4	22.1	11.5	2.3	0.137	-1.19	0.302	11.8
B8JMI2	Dishevelled segment polarity protein 3a OS=Danio rerio OX=7955 GN=dvl3a PE=1 SV=1	dvl3a	5	4.27239e+06	9.19109e+06	4.76036e+06	0	2.80337e+07	9.4729e+06	2.89659e+06	730405	11390379	3.01134e+06	4.17028e+06	6.41492e+06	0	8.12921e+06	14371615	7.98941e+06	1.07767e+07	6.27323e+06	9.57952e+06	1.47162e+07	1.19069e+07	0.078829	0.135313	0.278309	3.65199e+06	4.19064e+06	9.59661e+06	5.46946e+06	5.39298e+06	1.11391e+07	0.175414	0.109548	0.0647342	1.03194e+07	9.10019e+06	1.61208e+07	27.2	21.3	56.6	44.9	31.7	1.45	0.135	1.26	0.526	-1.44
A0A286YBE8	Serine--tRNA ligase, cytoplasmic OS=Danio rerio OX=7955 GN=sars PE=1 SV=1	sars	8	20603573	2.7806e+07	2.90102e+07	1.99907e+07	2.00466e+07	3.71005e+07	1.58914e+07	1.77036e+07	24103909	6.78597e+06	1.67925e+07	2.56802e+07	2.05239e+07	2.94313e+07	1.39384e+07	2.27787e+07	3.09346e+07	2.67551e+07	5.04915e+07	2.88575e+07	3.95916e+07	0.34569	-0.0301859	0.170197	1.59618e+07	1.85215e+07	1.5961e+07	1.16276e+07	1.40597e+07	3.85434e+07	-0.13759	-0.119702	0.382891	2.09278e+07	2.29485e+07	1.70078e+07	15.2	27.3	8.79	69.5	14.9	1.48	0.134	1.27	0.82	-1.6
A0A0R4ITT8	LIM domain 7a OS=Danio rerio OX=7955 GN=lmo7a PE=4 SV=1	lmo7a	22	1.44359e+08	1.5991e+08	1.80601e+08	9.1161e+07	6.04882e+07	8.54301e+07	1.06136e+08	1.66919e+08	1.84463e+08	2.28166e+07	1.1038e+08	4.95809e+07	1.07571e+08	8.8854e+07	1.03751e+08	1.6365e+08	1.71783e+08	1.6531e+08	1.55618e+08	9.54641e+07	9.62761e+07	-0.0218556	-0.25514	-0.234781	1.0767e+08	9.45649e+07	9.41871e+07	4.09636e+07	7.83514e+07	7.26077e+07	-0.419695	-0.0816835	-0.113009	9.3537e+07	8.18219e+07	1.1135e+08	2.57	29.8	7.77	31.5	15.6	-1.44	0.134	-1.54	0.142	-1.69
Q7ZV96	60S ribosomal protein L10 OS=Danio rerio OX=7955 GN=rpl10 PE=2 SV=1	rpl10	4	0	3.90901e+06	7.25384e+06	0	1.03331e+08	1.06568e+07	8.69055e+07	1.11027e+08	1.52941e+08	3.72157e+07	1.01436e+08	885478	64978660	4.73609e+07	5.15961e+07	6.33777e+06	4.88142e+06	8.61172e+06	2.52683e+07	1.13389e+08	1.14199e+07	0.60064	1.36602	0.122572	8.16718e+07	6.73822e+07	8.58201e+07	5.68288e+07	7.26148e+07	3.3131e+07	-0.157504	0.0324799	-0.413354	5.97988e+07	4.83537e+07	5.67002e+07	28.4	111	12.4	36.7	10.8	7.57	0.133	-1.44	0.21	11.8
Q6AZA2	NADH dehydrogenase [ubiquinone] flavoprotein 1, mitochondrial OS=Danio rerio OX=7955 GN=ndufv1 PE=1 SV=1	ndufv1	2	2957707	2.66733e+06	0	1.65468e+06	2.5302e+06	2.3758e+06	2.29656e+06	8.05898e+06	5.20422e+06	420987	1067098	0	0	1.97363e+06	1.64459e+06	4.2167e+06	3.18144e+06	5.32577e+06	2.88862e+06	3.01141e+06	2.77614e+06	-0.164282	-0.0238529	-0.282941	2.18322e+06	5.21082e+06	3.21846e+06	1.22293e+06	943913	655307	-0.251696	-0.741974	-0.691203	2.4702e+06	2.25897e+06	1.97644e+06	25.3	4.07	43.5	30.2	11.1	-1.47	0.133	-3.76	0.0171	-1.2
A0A0R4IPH9	Adenylate cyclase 9 OS=Danio rerio OX=7955 GN=adcy9 PE=3 SV=1	adcy9	8	7.06742e+08	282375136	91684860	3.95487e+07	8.69791e+07	3.56636e+07	2.14458e+07	7.78029e+07	7.5848e+07	1.03547e+08	5.23904e+07	5.91295e+07	9.8952e+06	1.61403e+08	148455946	7.83996e+08	2.91709e+08	8.60864e+07	7.3551e+07	7.42801e+07	4.01823e+07	-1.02773	-0.594078	-0.3309	3.3065e+07	4.47937e+07	4.46143e+07	1.69826e+08	3.89898e+07	1.30194e+08	0.710637	-0.0602665	0.465118	1.80505e+08	1.64105e+08	1.64512e+08	92.6	31.1	16.5	59.4	5.51	-6.18	0.133	2.77	0.195	-9.49
A0A286Y9E2	Family with sequence similarity 120C OS=Danio rerio OX=7955 GN=fam120c PE=1 SV=1	fam120c	12	1.01109e+08	184146851	1.23357e+09	1384883568	8.8772e+08	9.4851e+08	8.2721e+08	1.31372e+09	9.50657e+08	5.74092e+08	7.15789e+08	1.3073e+09	1070982756	9.18929e+08	9.85051e+08	1.33546e+08	1.92751e+08	1.09065e+09	2.50877e+09	1.06522e+09	9.5724e+08	1.27383	0.74244	-0.0566646	7.72193e+08	7.30446e+08	4.9418e+08	9.31934e+08	4.82921e+08	2.18867e+09	0.0816597	-0.179712	0.646295	9.51182e+08	9.26138e+08	1.09707e+09	114	57.4	22.5	73.6	9.31	3.2	0.131	1.8	0.442	1.41
E7EXG2	Drebrin-like b OS=Danio rerio OX=7955 GN=dbnlb PE=1 SV=1	dbnlb	5	41424567	3.09682e+07	6.33497e+07	58777065	18376634	6.81859e+07	2.545e+07	2.39925e+07	3.10097e+07	1.98771e+07	4.25131e+07	47690133	56870624	28510316	29478759	4.6538e+07	3.28761e+07	5.9282e+07	9.44018e+07	5.30172e+07	7.05626e+07	0.307172	0.207536	0.0756521	2.592e+07	1.63222e+07	2.04229e+07	6.42116e+07	3.12702e+07	7.77281e+07	0.393979	0.282353	0.580462	5.23197e+07	4.27541e+07	3.70317e+07	28.6	28.6	23.1	41.4	17.5	1.57	0.131	2.76	0.0548	-2.21
Q6PE34	Tubulin beta chain OS=Danio rerio OX=7955 GN=zgc:65894 PE=1 SV=1	zgc:65894	2	62217768	9000332	1470832	0	37365980	0	15532037	26916338	32179026	0	2808360	0	11321906	6170058	1.12486e+07	6.87446e+07	9.80552e+06	2.06966e+06	557021	2.10233e+06	949916	-2.09137	-0.66877	-0.338215	1.53714e+07	1.74903e+07	1.88338e+07	1.26176e+06	2.26954e+06	822362	-1.08574	-0.886859	-1.35987	1.03296e+07	9.40606e+06	1.22314e+07	136	66.8	10.1	51.1	13.5	-22.3	0.131	-11.9	0.0106	-1.56
B8JL29	High mobility group box 2a OS=Danio rerio OX=7955 GN=hmgb2a PE=1 SV=1	hmgb2a	4	20406619	12852895	1.97353e+07	0	1.39325e+07	8.72435e+06	0	9.91873e+06	20885955	4.24784e+06	11113012	5.70165e+06	0	2.97898e+06	8592322	2.29836e+07	1.36545e+07	1.80716e+07	7.47717e+06	1.5946e+07	9.74793e+06	-0.487681	0.0673775	-0.268085	9.74605e+06	7.95897e+06	1.26542e+07	2.93927e+07	9.37e+06	9.55917e+06	0.479411	0.0708828	-0.121814	3.80623e+06	4.14222e+06	4.03188e+06	25.6	39.6	23.4	71.4	4.29	-1.65	0.13	1.59	0.483	-1.8
Q1LYQ9	NFS1 cysteine desulfurase OS=Danio rerio OX=7955 GN=nfs1 PE=1 SV=1	nfs1	1	908474	0	1.43464e+06	988434	3.0254e+06	0	1.07367e+06	2.11725e+06	3.12543e+06	666310	1586009	0	0	1.17577e+06	1.04634e+06	978221	1.36098e+06	1.31565e+06	1.4703e+06	3.45699e+06	2.00717e+06	0.17697	0.404845	0.183443	1.02134e+06	1.39769e+06	1.92659e+06	909782	1.19557e+06	1.56471e+06	-0.0502348	-0.0678334	-0.0903556	1.11424e+06	1.18102e+06	1.12665e+06	17.2	44.5	31.4	26.8	3.11	1.9	0.129	-1.18	0.544	1.19
A0A0G2L1F5	Spectrin beta chain OS=Danio rerio OX=7955 GN=sptbn1 PE=1 SV=1	sptbn1	47	2.14694e+07	2.17555e+07	1.70072e+08	41356384	4.73342e+08	8.62498e+07	2.50343e+08	5.26977e+08	5.83693e+08	1.74103e+08	5.49094e+08	31894661	3.03079e+08	2.32993e+08	2.28206e+08	4.23784e+07	4.3764e+07	1.29371e+08	1.00023e+08	3.95156e+08	1.44391e+08	0.372953	0.955652	0.047705	3.04186e+08	3.23881e+08	3.37016e+08	3.04905e+08	3.61733e+08	2.52093e+08	0.00102518	0.0480028	-0.12609	2.8145e+08	2.48039e+08	2.70116e+08	69.4	74.6	5.14	17.9	6.37	2.97	0.128	-1.05	0.633	4.48
X1WF03	Baculoviral IAP repeat-containing 6 OS=Danio rerio OX=7955 GN=birc6 PE=1 SV=1	birc6	8	3.25422e+07	3.90757e+07	2.68117e+07	1.83943e+07	1.20363e+07	1.55351e+07	1.43853e+06	5.56506e+06	2.36266e+07	0	1.31356e+06	1.45381e+07	5.76129e+06	1.17727e+07	1.17993e+07	3.54057e+07	3.97622e+07	2.44214e+07	2.9508e+07	1.85487e+07	1.62607e+07	-0.0791333	-0.331157	-0.176631	4.46911e+06	6.1253e+06	6.93001e+06	2.01729e+06	3.22057e+06	6.31343e+06	-0.345452	-0.279195	-0.0404685	1.03154e+07	7.77252e+06	1.50926e+07	23.8	33	21.5	57.6	33.6	-1.55	0.128	-1.52	0.26	-5.68
Q7SYK7	Aspartate aminotransferase OS=Danio rerio OX=7955 GN=got2a PE=1 SV=1	got2a	3	134816659	2.52975e+08	322709786	7.25271e+07	1.57286e+08	9.72946e+07	2.26045e+07	9.71728e+07	7.50207e+07	1.02623e+07	5.85553e+07	5.71657e+07	155130019	1.16959e+08	1.36213e+08	1.49183e+08	2.49163e+08	2.87447e+08	1.21085e+08	1.8589e+08	1.00955e+08	-0.0906302	-0.127228	-0.454431	2.51562e+07	5.81365e+07	4.24999e+07	1.46068e+07	4.15196e+07	9.28969e+07	-0.236088	-0.146196	0.339614	1.38969e+08	1.17643e+08	1.50329e+08	31.2	32.6	39.3	80.1	12.2	-1.68	0.128	1.18	0.959	-5.45
Q90X22	Titin (Fragment) OS=Danio rerio OX=7955 GN=ttn.2 PE=2 SV=1	ttn.2	1	0	0	8.0077e+06	0	0	0	0	0	0	0	0	0	0	0	0	410670	481714	1.11248e+06	93547.5	113079	495476	-0.64246	-0.629405	-0.351271	130255	371157	457550	678155	640269	515410	0.716536	0.236805	0.0517142	604945	347010	347405	57.8	96.8	53.1	13.9	34.4	-2.86	0.128	1.91	0.181	-2.09
B0R0K2	Potassium voltage-gated channel, KQT-like subfamily, member 1 OS=Danio rerio OX=7955 GN=kcnq1 PE=3 SV=1	kcnq1	3	1.5913e+06	0	0	1.11014e+06	1.14058e+07	0	1.79965e+07	2.93466e+07	2.97274e+07	4.12495e+06	18531729	0	6.88813e+06	7.41159e+06	8.75014e+06	2.5079e+06	1.49218e+06	2.23772e+06	2.92439e+06	1.30761e+07	5.05913e+06	0.0667255	0.942656	0.354271	1.70064e+07	1.85161e+07	1.76163e+07	6.09943e+06	1.35798e+07	1.27588e+07	-0.445323	-0.134655	-0.140105	6.54225e+06	7.97202e+06	9.79794e+06	25.3	76.2	4.29	37.9	20.1	3.38	0.127	-1.64	0.163	8.52
Q6PC12	Enolase 1, (Alpha) OS=Danio rerio OX=7955 GN=eno1a PE=1 SV=1	eno1a	1	0	0	0	2.66674e+06	579876	0	872318	4832147	3.51157e+06	544719	8835120	1.22261e+06	0	1.81596e+06	1.19502e+06	238031	494686	451862	4.08169e+06	652889	1.02781e+06	1.23421	0.120509	0.356906	830427	3.11573e+06	2.15647e+06	740288	6.43752e+06	1.74877e+06	-0.0499006	0.315159	-0.0910106	2.36103e+06	1.82432e+06	1.28766e+06	34.8	97.9	56.4	102	29.4	4.86	0.126	1.46	0.867	5.15
A0A0G2KZ18	Microtubule-associated protein OS=Danio rerio OX=7955 GN=LOC100001114 PE=1 SV=1	LOC100001114	17	1.92606e+08	2.08583e+08	1.81309e+08	1.08242e+08	1.35076e+07	1.39163e+08	6.24967e+06	1.50602e+07	2.22734e+07	3.46537e+06	2.22776e+07	87989996	8.87355e+07	7.63879e+07	6.7232e+07	2.27739e+08	2.12657e+08	1.66006e+08	1.83022e+08	1.0717e+08	1.34492e+08	-0.0949323	-0.297607	-0.0914267	1.21204e+07	1.64177e+07	1.76205e+07	4.94567e+07	2.23254e+07	9.78383e+07	0.610709	0.133485	0.744491	8.58459e+07	8.069e+07	7.61344e+07	15.9	27.1	18.8	67.7	6.01	-1.43	0.125	3.67	0.107	-13.1
B0UX67	Serine/threonine-protein kinase TOR OS=Danio rerio OX=7955 GN=mtor PE=1 SV=1	mtor	3	5609397	6.5369e+06	0	1.30548e+06	4.66129e+06	0	3.35808e+06	6847704	5112573	2.53277e+06	3.49655e+06	1.06711e+06	4.05031e+06	3.17845e+06	0	7.72186e+06	7.29323e+06	6.72065e+06	3.14676e+06	5.30483e+06	5.66564e+06	-0.389858	-0.138249	-0.0741622	3.19343e+06	4.50507e+06	4.26616e+06	3.65953e+06	3.59677e+06	2.89771e+06	0.0591676	-0.0977884	-0.167981	3.72239e+06	3.43548e+06	3.10413e+06	6.93	28.9	17.5	12.5	9.04	-1.54	0.125	-1.18	0.298	-1.82
F1QWK4	Protein-methionine sulfoxide oxidase mical3b OS=Danio rerio OX=7955 GN=mical3b PE=3 SV=2	mical3b	1	11146354	8.24363e+06	7.40455e+06	0	0	4.05318e+06	4.62896e+06	4919718	0	2.26143e+06	3.83809e+06	10942330	0	7856720	5760780	1.21654e+07	8.39023e+06	6.72273e+06	80872.7	294639	4.18028e+06	-2.17733	-1.45448	-0.20634	4.38029e+06	3.17057e+06	4.50553e+06	3.17666e+06	2.84308e+06	1.65523e+07	-0.139532	-0.0473484	0.565113	6.43946e+06	7.89657e+06	6.25969e+06	30.7	152	18.3	104	13.1	-5.99	0.124	1.87	0.664	-2.26
F1RAX8	Ubiquinone biosynthesis monooxygenase COQ6, mitochondrial OS=Danio rerio OX=7955 GN=coq6 PE=2 SV=1	coq6	1	0	0	0	0	1.0729e+06	0	0	0	1352720	0	615376	0	0	0	0	271139	413651	357831	610078	1.21465e+06	451774	0.352194	0.467816	0.101243	599586	777630	856748	223752	472662	391185	-0.428084	-0.216223	-0.340471	1.02599e+06	218053	927906	20.7	53.1	17.7	35	60.9	2.18	0.123	-2.05	0.0594	2.14
A0A0R4I9P4	Non-specific serine/threonine protein kinase OS=Danio rerio OX=7955 GN=pak1 PE=1 SV=1	pak1	4	4706381	0	0	0	2.94614e+07	1.75139e+06	1.0512e+07	2.53071e+07	2.28321e+07	1.70505e+07	46561591	2.44599e+06	1.15625e+07	5.03709e+06	1.19219e+07	1.28507e+06	2.15819e+06	2.00379e+06	4.05957e+06	1.32497e+07	2.97296e+06	0.499553	0.788117	0.171338	1.27115e+07	1.62928e+07	1.38756e+07	2.52675e+07	3.36432e+07	1.42067e+07	0.298366	0.3149	0.0102414	1.11846e+07	8.88645e+06	1.34406e+07	25.7	83.5	12.8	40	20.4	3.72	0.121	1.71	0.193	7.87
A0A0R4IKF0	Apolipoprotein A-Ib OS=Danio rerio OX=7955 GN=apoa1b PE=1 SV=1	apoa1b	11	9.59048e+06	6.82503e+06	9675420	2.79032e+07	4.1577e+08	4.57563e+06	3.19045e+07	4.77363e+08	6.16831e+08	3.18519e+08	7.47039e+08	5.78936e+06	2.27888e+08	2.16352e+08	2.17685e+08	1.44872e+07	1.36938e+07	1.65577e+07	4.84404e+07	2.57091e+08	3.41804e+07	0.524222	1.27356	0.314776	1.39712e+08	2.8601e+08	3.25691e+08	4.78928e+08	5.06545e+08	4.88939e+08	0.535037	0.248236	0.176448	2.06685e+08	2.18417e+08	2.39892e+08	9.92	110	39.1	2.84	7.6	7.59	0.12	1.96	0.107	16.8
Q7SZP2	UPF0690 protein C1orf52 homolog OS=Danio rerio OX=7955 GN=zgc:65873 PE=1 SV=1	zgc:65873	4	2.33338e+07	4.00113e+07	39308977	1.84495e+07	2159247	1.52565e+07	5.10794e+06	3162427	3.61446e+06	2.14259e+06	2.9795e+06	2.43515e+07	18527764	16617003	1.33035e+07	3.44352e+07	4.07333e+07	3.5624e+07	2.90476e+07	1.00631e+07	1.61108e+07	-0.0738928	-0.607216	-0.344624	5.31369e+06	2.65815e+06	3.66878e+06	3.48134e+06	3.44096e+06	2.13945e+07	-0.18365	0.1121	0.765779	1.78263e+07	1.69623e+07	1.47913e+07	9.06	52.7	34.5	110	9.46	-2.01	0.12	2.43	0.479	-9.52
Q8JGT0	Casein kinase 1, alpha 1 OS=Danio rerio OX=7955 GN=csnk1a1 PE=1 SV=1	csnk1a1	1	0	2.72713e+06	2.85018e+06	1.34089e+06	1.03596e+06	0	2.22365e+06	0	1.59123e+06	0	2537005	0	0	0	1.68295e+06	1.96662e+06	2.77223e+06	2.60287e+06	2.01216e+06	1.17246e+06	774146	0.0099433	-0.373731	-0.526629	2.10975e+06	866865	1.00253e+06	190432	1.89476e+06	214080	-1.04449	0.339602	-0.670523	964762	421621	1.81673e+06	17.4	47.9	51.4	128	65.9	-1.85	0.119	-1.73	0.292	-1.85
A0A0R4ISM7	Paralemmin 2 OS=Danio rerio OX=7955 GN=palm2 PE=1 SV=1	palm2	21	5.19975e+08	5.40495e+08	3.3494e+08	2.18808e+08	9.09452e+07	2.62815e+08	3.5724e+08	186435213	2.55835e+08	5.27531e+07	1.47796e+08	1.64674e+08	2.33209e+08	2.09595e+08	3.20329e+08	5.71916e+08	5.5145e+08	3.10541e+08	3.60444e+08	2.23237e+08	2.72965e+08	-0.200495	-0.392739	-0.0560119	3.40198e+08	1.17157e+08	1.5729e+08	1.00771e+08	1.03506e+08	2.48926e+08	-0.528394	-0.0538052	0.19937	2.17573e+08	2.28773e+08	3.52761e+08	30.4	24.3	58	56.1	28.2	-1.67	0.116	-1.36	0.537	-2.33
A0A0R4IS70	Purine-rich element-binding protein Ba OS=Danio rerio OX=7955 GN=purba PE=1 SV=1	purba	2	1.05733e+06	2.57418e+06	1529261	1.2824e+06	5.61179e+06	6.91377e+06	3.59966e+06	7.0769e+06	7.88878e+06	2.9485e+06	7852640	4.67548e+06	2.35116e+06	7.20735e+06	3.30432e+06	1.3981e+06	2.61462e+06	1.61162e+06	2.21943e+06	7.25945e+06	8.1871e+06	0.200703	0.443495	0.705869	3.88219e+06	5.10892e+06	5.03206e+06	4.63681e+06	5.77376e+06	1.10655e+07	0.077142	0.0531292	0.342223	5.9109e+06	7.24211e+06	6.86855e+06	34.6	54.5	14.7	47.9	10.3	3.14	0.115	1.53	0.298	2.49
Q568B3	Septin 10 OS=Danio rerio OX=7955 GN=sept10 PE=1 SV=1	43718	2	2.02863e+06	1494836	3843398	0	1.53625e+07	1.7368e+06	3.043e+06	4.87446e+06	1.05478e+07	5.39589e+06	13034815	1.37223e+06	0	0	3.30677e+06	2.51873e+06	1.88204e+06	3.66739e+06	9.13525e+06	9.37527e+06	3.09148e+06	0.559538	0.697355	-0.0741916	3.00826e+06	3.27143e+06	6.3857e+06	1.04304e+07	9.55477e+06	7.00209e+06	0.539984	0.465483	0.040019	656412	850670	4.20805e+06	33.6	49.4	44.5	19.8	105	2.68	0.115	2.13	0.0583	1.57
Q5XJ03	Fdps protein (Fragment) OS=Danio rerio OX=7955 GN=fdps PE=2 SV=1	fdps	4	24954499	2.82051e+07	3.03069e+07	1.10556e+07	5.76975e+06	1.83727e+07	6.97383e+06	12834837	1.0452e+07	10203350	9.16329e+06	1.9322e+07	12256096	1.39528e+07	1.46918e+07	2.71795e+07	2.87096e+07	2.7454e+07	1.74863e+07	8.62306e+06	1.89619e+07	-0.191543	-0.522366	-0.160723	7.03148e+06	8.94997e+06	6.60982e+06	1.75349e+07	7.01473e+06	2.88431e+07	0.396857	-0.105811	0.639853	1.15634e+07	1.48385e+07	1.66214e+07	2.94	37.2	16.6	61.3	17.9	-1.85	0.115	2.36	0.223	-3.69
A0A0G2L2U8	Uncharacterized protein OS=Danio rerio OX=7955 PE=4 SV=1	A0A0G2L2U8	15	330933	0	6.76372e+06	1664790	3.52351e+08	1.23518e+07	6.08576e+08	8.34308e+08	5.72075e+08	1.779e+08	4.91371e+08	2.2778e+07	2.34693e+08	256421239	2.18506e+08	7.50033e+06	6.30767e+06	8.1845e+06	2.524e+07	1.23562e+08	1.66964e+07	0.527009	1.29201	0.30963	5.24617e+08	5.00459e+08	3.54669e+08	2.66537e+08	3.25867e+08	2.60208e+08	-0.294085	-0.186327	-0.134502	2.37167e+08	2.41493e+08	2.43265e+08	13	108	20	12.7	1.3	7.53	0.114	-1.62	0.0412	62.7
A0A0R4IYU1	Fumarate hydratase, mitochondrial OS=Danio rerio OX=7955 GN=fh PE=1 SV=1	fh	3	3.07724e+07	5.24835e+07	2.00448e+07	7.2933e+07	4.23799e+07	6.50657e+07	1.65022e+08	2.992e+08	2.44903e+08	7.46032e+07	2.19263e+08	1.59689e+07	1.10682e+08	9.55639e+07	8.89245e+07	3.4161e+07	5.35208e+07	1.81394e+07	1.22344e+08	4.94242e+07	6.74714e+07	0.554052	-0.0345835	0.570498	1.54262e+08	1.7253e+08	1.32548e+08	1.1317e+08	1.50579e+08	2.79025e+07	-0.134528	-0.0591019	-0.676729	9.93747e+07	9.61173e+07	9.79242e+07	50.2	47.6	13.1	64.7	1.67	2.26	0.114	-1.57	0.328	4.34
A0A0R4IWD0	LIM domain-binding 3b (Fragment) OS=Danio rerio OX=7955 GN=ldb3b PE=1 SV=1	ldb3b	4	8.64165e+07	8.22932e+07	6.80237e+07	2.74264e+07	29703828	6.9238e+06	3.2497e+06	0	3.45715e+06	0	5.97707e+06	1.68714e+07	1.77693e+07	10948863	17974776	9.47787e+07	8.38658e+07	6.13238e+07	3.55587e+07	3.49133e+07	7.74907e+06	-0.425765	-0.380594	-0.89838	4.90832e+06	1.05528e+06	3.49012e+06	1.37532e+07	5.51718e+06	2.61374e+07	0.447471	0.718348	0.874422	1.67182e+07	1.30743e+07	2.05762e+07	21.3	60.9	61.8	68.6	22.3	-3.07	0.114	4.8	0.0733	-25.4
E7F9K1	LIM domains-containing 1a OS=Danio rerio OX=7955 GN=limd1a PE=1 SV=1	limd1a	5	3.35605e+07	3.60151e+07	2.56699e+07	9.64145e+06	1.61497e+06	2.3518e+07	5.51996e+06	4.88463e+06	8.18408e+06	2.40277e+06	6.1987e+06	1.55816e+07	1.45623e+07	1.26097e+07	1.01664e+07	3.65607e+07	3.66583e+07	4.37039e+07	1.62979e+07	2.91307e+06	1.43582e+07	-0.350883	-1.09982	-0.483421	6.69089e+06	6.89888e+06	6.53712e+06	4.57643e+06	6.00875e+06	2.37611e+07	-0.164956	-0.0599945	0.560479	1.42242e+07	1.28683e+07	1.27193e+07	10.5	64.6	2.71	93.3	6.25	-3.48	0.114	1.71	0.664	-5.81
B8JHU4	Actinin, alpha 1 OS=Danio rerio OX=7955 GN=actn1 PE=1 SV=1	actn1	1	682847	0	9.62041e+06	0	0	1.31427e+06	0	0	0	0	2588376	544802	789460	1.15863e+06	1.06889e+06	734141	4.70816e+06	8.7206e+06	262320	287643	1.35239e+06	-0.446948	-1.214	-0.809445	236391	939279	861784	991596	1.93236e+06	763340	0.622704	0.313293	-0.0526807	728700	1.1638e+06	1.15107e+06	84.6	98.1	56.7	50.4	24.4	-7.44	0.114	1.81	0.279	-6.95
Q7ZWJ4	60S ribosomal protein L18a OS=Danio rerio OX=7955 GN=rpl18a PE=2 SV=1	rpl18a	4	0	0	3.46614e+06	771562	4.73799e+07	5718386	2.43268e+06	30069303	41005317	9630696	37837803	0	13929374	9.90689e+06	1.82017e+07	2.97182e+06	1.86159e+06	4.91514e+06	4.75482e+06	1.80568e+07	6.75361e+06	0.204112	0.986756	0.138	1.5531e+07	1.97581e+07	2.44245e+07	1.48293e+07	2.80691e+07	3.8871e+07	-0.0200792	0.152484	0.201801	1.36728e+07	1.63255e+07	2.00136e+07	47.6	72.8	22.3	44.2	19.1	3.03	0.113	1.37	0.474	6.13
F1QI09	Sorbin and SH3 domain-containing 2a OS=Danio rerio OX=7955 GN=sorbs2a PE=1 SV=2	sorbs2a	5	142104779	1.84973e+08	1.81352e+08	88072544	1.31534e+07	1.15136e+08	2.49851e+06	5.65513e+06	30791293	1.80971e+06	1.74508e+06	65619754	44802892	7.67722e+07	6.17112e+07	1.56388e+08	1.89072e+08	2.71545e+08	1.44993e+08	5.886e+07	1.19478e+08	-0.032857	-0.506807	-0.356554	3.46599e+06	4.45e+06	5.7924e+06	4.32053e+06	3.481e+06	5.14363e+07	0.0957093	-0.106657	0.948411	4.59366e+07	5.78387e+07	4.99714e+07	28.9	41.1	25.6	139	11.8	-1.91	0.113	4.32	0.494	-45
B8JIS5	Glutathione S-transferase mu tandem duplicate 3 OS=Danio rerio OX=7955 GN=gstm.3 PE=1 SV=1	gstm.3	5	18366928	15137156	2.27037e+07	1.87032e+07	4.0638e+07	2.09938e+07	27430785	4.86071e+07	50066545	3.77532e+07	3.94265e+07	1.69944e+07	25844797	3.38429e+07	3.10751e+07	2.02202e+07	1.68555e+07	2.09031e+07	4.18565e+07	4.07909e+07	2.18082e+07	0.315979	0.383821	0.0184091	2.59365e+07	3.06588e+07	2.96405e+07	5.46481e+07	2.87319e+07	3.80176e+07	0.323664	-0.0281901	0.108098	2.68466e+07	3.40144e+07	3.38023e+07	11.2	32.4	8.65	32.4	12.9	1.8	0.112	1.41	0.233	1.49
F1R8A2	Pleckstrin homology domain-containing, family A member 5 OS=Danio rerio OX=7955 GN=plekha5 PE=4 SV=2	plekha5	2	5.9914e+06	3.79911e+06	5.06315e+06	0	4.25639e+07	715544	3703534	5162174	3.51705e+06	1.49913e+06	1.36573e+07	0	2.0194e+06	2.21544e+06	1.03959e+06	6.5068e+06	4.59264e+06	4.90542e+06	985367	3.89829e+06	906518	-0.81977	-0.0711878	-0.7333	3.63721e+06	3.98737e+06	2.56906e+06	2.23372e+06	3.87204e+06	3.14296e+06	-0.21174	-0.0127463	0.0875655	2.45231e+06	2.46463e+06	1.88708e+06	19.2	88.3	21.7	26.6	14.5	-2.76	0.112	-1.1	0.642	-1.57
A0A0R4IIA6	Si:ch73-43g23.1 OS=Danio rerio OX=7955 GN=si:ch73-43g23.1 PE=4 SV=1	si:ch73-43g23.1	3	2.62223e+07	5.27941e+07	4.36676e+06	1203041	1.70002e+06	4.11905e+06	333447	2000511	5.37171e+06	0	601502	2.84677e+06	3.89916e+06	1.78881e+06	751059	2.8665e+07	5.38188e+07	7.41938e+06	3.5415e+06	6.99641e+06	4.97949e+06	-0.908165	-0.886059	-0.173182	1.58453e+06	2.28943e+06	3.40324e+06	2.22329e+06	917324	4.22437e+06	0.147095	-0.397204	0.0938688	4.11978e+06	1.79645e+06	2.18253e+06	77.5	33.6	37.8	67.8	46.1	-5.79	0.111	1.01	0.824	-12.4
E7F4K5	Sperm associated antigen 9 OS=Danio rerio OX=7955 PE=4 SV=2	spag9b	1	0	0	0	0	651025	567251	0	0	0	0	704415	0	390190	0	0	523011	155728	255283	793764	733754	582709	0.181181	0.673184	0.358429	126050	283525	1.08273e+06	440666	539606	702227	0.543566	0.279486	-0.188044	361659	324727	616776	61	15.5	103	23.5	36.6	2.26	0.11	1.13	0.521	1.6
A0A0R4IDK6	Nucleosome assembly protein 1-like 1 OS=Danio rerio OX=7955 GN=nap1l1 PE=1 SV=1	nap1l1	6	1.53674e+08	1.42685e+08	1.51534e+08	2.11384e+08	1.3204e+08	1.89592e+08	8.37893e+07	1.08767e+08	1.78617e+08	8.09481e+07	2.29228e+08	240310901	129234482	2.04477e+08	1.09559e+08	1.69536e+08	1.45772e+08	1.37246e+08	3.54595e+08	5.09595e+08	1.90482e+08	0.320471	0.543551	0.142353	7.92203e+07	6.6374e+07	6.73956e+07	3.6121e+08	1.61424e+08	4.04394e+08	0.658924	0.385969	0.778173	1.17533e+08	2.0642e+08	1.23544e+08	11.1	45.4	10.1	41.9	33.3	2.33	0.109	4.35	0.036	-2.12
A0A0R4IQH8	Chaperonin-containing TCP1, subunit 6A (zeta 1) OS=Danio rerio OX=7955 GN=cct6a PE=1 SV=1	cct6a	3	2.144e+06	2.72589e+06	4.26202e+06	1.33102e+06	6.19879e+06	3261306	3.79814e+06	10239154	8.75566e+06	2.01046e+06	3.64744e+06	3.76489e+06	4.28758e+06	4.69769e+06	3901704	2.69673e+06	2.95905e+06	3.90604e+06	5.83227e+06	7.06465e+06	3.56882e+06	0.334999	0.377938	-0.0392114	5.01418e+06	6.66578e+06	5.39507e+06	3.17347e+06	5.43934e+06	5.39985e+06	-0.198666	-0.0883051	0.000384246	4.25733e+06	4.71932e+06	4.48112e+06	20	32.3	15.2	27.8	5.15	1.72	0.109	-1.22	0.35	1.79
Q66HV4	Coatomer subunit beta OS=Danio rerio OX=7955 GN=copb1 PE=2 SV=1	copb1	3	2.58288e+06	3.37638e+06	3.55242e+06	669886	5820948	3.51171e+06	3.27166e+06	8.80195e+06	8.47118e+06	3.17348e+06	5.59661e+06	3383681	2.04468e+06	4.75018e+06	2.35414e+06	2.78085e+06	3.42891e+06	3.26075e+06	5.09379e+06	6.62681e+06	3.61279e+06	0.262864	0.286148	0.0445249	5.07322e+06	5.75394e+06	5.23534e+06	4.38286e+06	5.57624e+06	4.83242e+06	-0.0635259	-0.0136236	-0.0347798	3.99535e+06	4.77185e+06	3.49353e+06	10.7	29.5	6.64	12.2	15.8	1.62	0.109	-1.09	0.357	1.7
Q6DHT4	Aldehyde dehydrogenase 6 family, member A1 OS=Danio rerio OX=7955 GN=aldh6a1 PE=1 SV=1	aldh6a1	11	6.43135e+07	64818062	7.89909e+07	2.49555e+07	6.06295e+07	3.49891e+07	1.14607e+08	2.21303e+08	2.22345e+08	1.75551e+07	75532958	5.08817e+07	1.02945e+08	66331288	9.92043e+07	7.12133e+07	6.75253e+07	6.8271e+07	5.68449e+07	5.67561e+07	4.06287e+07	-0.097869	-0.0754542	-0.225404	1.19139e+08	1.36442e+08	1.18039e+08	2.63805e+07	4.17665e+07	7.75926e+07	-0.65477	-0.51412	-0.182207	9.81922e+07	1.02733e+08	1.08518e+08	2.83	18.2	8.29	54.1	5.02	-1.34	0.108	-2.56	0.077	1.8
A0A0R4IPH0	Phosphatase and actin regulator 4A OS=Danio rerio OX=7955 GN=phactr4a PE=4 SV=1	phactr4a	10	0	7.91188e+06	3.54558e+06	0	3.02516e+07	9.51043e+06	5.31416e+07	5.78762e+07	6.41174e+07	5.46386e+06	3.69699e+07	9.30347e+06	1.21705e+07	16256219	1.07015e+07	7.64964e+06	1.3709e+07	6.93929e+06	1.67309e+07	2.27787e+07	1.15748e+07	0.339878	0.220524	0.222199	5.02289e+07	4.05054e+07	3.93133e+07	1.01111e+07	2.41278e+07	2.19565e+07	-0.696154	-0.224994	-0.252976	1.41307e+07	1.9075e+07	1.47943e+07	39.4	32.9	13.8	40.3	16.8	1.81	0.107	-2.31	0.0727	4.6
F1QXV8	Phosphoglycerate kinase OS=Danio rerio OX=7955 GN=pgk1 PE=1 SV=1	pgk1	10	1.47525e+08	1.6934e+08	1.79117e+08	6.65732e+07	8.12371e+07	7.12733e+07	9.18085e+07	1.25139e+08	1.32228e+08	4.83834e+07	181476920	1.16989e+08	8.79911e+07	92151300	1.76036e+08	1.62336e+08	2.19531e+08	1.61476e+08	1.56008e+08	8.59839e+07	7.44652e+07	-0.0172682	-0.407078	-0.336155	9.74718e+07	8.06258e+07	7.72187e+07	1.47168e+08	1.22699e+08	2.2547e+08	0.178934	0.182366	0.465367	8.08384e+07	9.75878e+07	1.96858e+08	18.4	41.8	12.7	32.5	50.1	-1.72	0.107	1.94	0.0569	-2.13
E3W9A6	Sema domain, transmembrane domain (TM), and cytoplasmic domain, (semaphorin) 6E OS=Danio rerio OX=7955 GN=sema6e PE=2 SV=1	sema6e	4	13479401	12155821	0	7.84912e+06	8.99096e+06	3.334e+06	9.46669e+06	19512208	1.4779e+07	3.02841e+06	4.48107e+06	0	2.23794e+06	4.28448e+06	0	1.65964e+07	1.36379e+07	2.51448e+07	1.34148e+07	1.04212e+07	5.88411e+06	-0.09243	-0.116828	-0.630766	1.1687e+07	1.27721e+07	9.14549e+06	5.61552e+06	4.84671e+06	6.44109e+06	-0.318313	-0.420815	-0.152247	3.12258e+06	5.86907e+06	1.72688e+06	32.4	38.3	16.6	14.2	59	-1.86	0.107	-1.99	0.00678	-1.65
F1R1B0	DnaJ (Hsp40) homolog, subfamily B, member 2 OS=Danio rerio OX=7955 GN=dnajb2 PE=4 SV=1	dnajb2	1	7.29495e+06	1.59141e+06	5.04851e+06	6.06403e+06	10707386	0	8678346	12517152	11497293	0	8418593	8608326	0	7.84465e+06	7.62843e+06	7.94374e+06	1.61677e+06	4.59437e+06	9.5035e+06	1.23738e+07	1.90487e+07	0.0778586	0.883857	0.61764	8.19358e+06	7.85487e+06	6.79475e+06	4.0117e+06	6.1399e+06	1.29422e+07	-0.310146	-0.106978	0.279834	1.12332e+07	7.88444e+06	8.30152e+06	67.1	35.9	9.58	60.6	20	2.89	0.106	1.01	0.789	1.61
A6XCT1	NDRG family member 4 OS=Danio rerio OX=7955 GN=ndrg4 PE=1 SV=1	ndrg4	8	3.44774e+06	12923897	1.6297e+07	1.22371e+07	2.41007e+08	1.36991e+07	3.70509e+08	5.15955e+08	5.06209e+08	2.17462e+08	5.59096e+08	3.32146e+06	1.7446e+08	1.76679e+08	1.76954e+08	6.95328e+06	9.4686e+06	1.18482e+07	3.45498e+07	1.68773e+08	2.18456e+07	0.696257	1.25102	0.265712	3.47178e+08	3.03803e+08	2.7874e+08	3.27058e+08	3.87906e+08	9.74795e+08	-0.0259268	0.106135	0.543713	1.6009e+08	1.7792e+08	1.9494e+08	26	108	11.2	63.5	9.81	7.96	0.104	1.82	0.292	32.9
Q6P3J5	Eukaryotic translation elongation factor 2 OS=Danio rerio OX=7955 GN=eef2b PE=1 SV=1	eef2b	23	114628423	1.00707e+08	1.18201e+08	9.36733e+07	3.72282e+08	1.43474e+08	1.53935e+08	2.61086e+08	4.17514e+08	1.49602e+08	3.18175e+08	75482434	1.84157e+08	1.60162e+08	1.64836e+08	1.32684e+08	1.08481e+08	1.3071e+08	2.25708e+08	3.62053e+08	1.59389e+08	0.23073	0.523418	0.0861499	1.65071e+08	1.87146e+08	2.51349e+08	1.99665e+08	2.26663e+08	2.28713e+08	0.0826326	0.0832008	-0.0409873	1.73599e+08	1.68402e+08	1.79847e+08	10.8	41.5	22.3	7.42	3.29	2.01	0.104	1.09	0.53	1.62
Q803M8	Tryosine 3-monooxygenase/tryptophan 5-monooxygenase activation protein, zeta polypeptide OS=Danio rerio OX=7955 GN=ywhaqb PE=1 SV=1	ywhaqb	1	6.28528e+06	11937033	2.6271e+07	0	2570516	8603330	0	4.1553e+06	0	0	5.48569e+06	6567373	0	0	5153831	6.83877e+06	1.21543e+07	2.36681e+07	3.01338e+06	2.93294e+06	8.88669e+06	-0.355925	-0.617426	-0.425424	654099	2.69086e+06	321273	9.90143e+06	4.03491e+06	9.80571e+06	1.18005	0.175944	1.48461	872778	859099	5.59685e+06	60.5	69.1	105	42.5	112	-2.88	0.104	6.48	0.0546	-11.6
E7FGK0	Oxysterol-binding protein OS=Danio rerio OX=7955 GN=osbpl5 PE=3 SV=1	osbpl5	12	5505838	6.06427e+06	5.18866e+06	9.84127e+06	1.19885e+08	1.06821e+07	82197568	146058549	1.8758e+08	4.92781e+07	1.8754e+08	1.53177e+07	4.80067e+07	55179803	5.61013e+07	1.06921e+07	1.24996e+07	9.92666e+06	2.89627e+07	1.16963e+08	2.52962e+07	0.432777	0.971152	0.406252	8.82e+07	9.33816e+07	1.00381e+08	7.47609e+07	1.20176e+08	3.2224e+08	-0.0717944	0.109556	0.506526	4.66676e+07	5.94836e+07	6.32325e+07	12	90.9	6.5	76.4	15.4	5.17	0.102	1.83	0.434	8.51
[truncated: 327 more rows]
[truncated: 1 more columns]
