# Supplementary material for: In vivo proximity labeling identifies cardiomyocyte protein networks during zebrafish heart regeneration
Source: eLife. 2021 Mar 25;10:e66079. doi: 10.7554/eLife.66079 (PMC8034980; doi:10.7554/eLife.66079)
Supplement: Supplementary file 8. [file elife-66079-supp8.xlsx]

## Sheet: T3 - Raw & Norm Drerio
Supplementary File 8: Raw data from ErbB2-HA-BirA2-P2A-GFP BioID2 assays used to generate Supplementary File 4.
Accession	Description	Peptides	46211 ErbB2 Cre(n)	46212 ErbB2 Cre(n)	46213 ErbB2 Cre(n)	46214 ErbB2 Cre(p)	46215 ErbB2 Cre(p)	46216 ErbB2 Cre(p)	46217_1 SPQC	46217_2 SPQC	46217_3 SPQC	46217_4 SPQC	46211 ErbB2 Cre(n) Normalized	46212 ErbB2 Cre(n) Normalized	46213 ErbB2 Cre(n) Normalized	46214 ErbB2 Cre(p) Normalized	46215 ErbB2 Cre(p) Normalized	46216 ErbB2 Cre(p) Normalized	46217_1 SPQC Normalized	46217_2 SPQC Normalized	46217_3 SPQC Normalized	46217_4 SPQC Normalized	ErbB2 Cre(n)_CV	ErbB2 Cre(p)_CV	SPQC_CV	ErbB2 Cre(p)_v_ErbB2 Cre(n)_FC	ErbB2 Cre(p)_v_ErbB2 Cre(n)_Pval
A0A0A0MPL5	Fascin OS=Danio rerio OX=7955 GN=fscn1b PE=1 SV=1	1	0	0	0	1.39615e+07	0	0	0	902424	1.02661e+06	0	959230	685565	128850	472049	703252	614758	1.31883e+06	803842	930823	1.09452e+06	71.6	19.6	21.4	1.01	0.686
A0A0G2KHA1	Vinculin b OS=Danio rerio OX=7955 GN=vclb PE=1 SV=1	1	0	0	0	0	0	0	4546695	5189062	5179431	4109255	257478	1.09896e+06	190958	414035	596760	476022	4.505e+06	4.6222e+06	4.69616e+06	3.99279e+06	98.1	18.7	7.13	-1.04	0.681
A0A0G2KJ47	Syntrophin alpha 1 OS=Danio rerio OX=7955 PE=1 SV=2	4	745015	0	0	692738	253021	418812	1481667	2.09698e+06	2.87576e+06	3421952	2.46629e+06	1.35978e+06	2.92565e+06	2.49592e+06	2.79078e+06	2.79701e+06	2.15152e+06	2.20371e+06	2.86555e+06	3.50242e+06	35.8	6.39	23.8	1.2	0.429
A0A0G2KSV9	Uncharacterized protein OS=Danio rerio OX=7955 PE=1 SV=1	2	0	0	0	0	0	0	559774	0	399654	850186	1.29743e+06	616165	904431	1.28001e+06	1.02849e+06	921500	1.05064e+06	582292	469605	1.07743e+06	36.4	17.1	39.5	1.15	0.521
A0A0G2KZ18	Microtubule-associated protein OS=Danio rerio OX=7955 GN=LOC100001114 PE=1 SV=1	22	8.02793e+07	6.67058e+07	8.34256e+07	1.37226e+08	1.2519e+08	6.94936e+07	1.27564e+08	1.38582e+08	1.27269e+08	1.30115e+08	1.82921e+08	1.61604e+08	2.11797e+08	2.19803e+08	2.4577e+08	2.25255e+08	1.27606e+08	1.26426e+08	1.20819e+08	1.32736e+08	13.6	5.95	3.85	1.24	0.0887
A0A0G2L365	Uncharacterized protein OS=Danio rerio OX=7955 GN=LOC100329813 PE=1 SV=1	2	1.51852e+06	0	5.89177e+06	705502	2.01297e+06	0	2.41976e+06	5.01004e+06	445049	0	3.36652e+06	3.99566e+06	1.48888e+07	1.4416e+06	4.36033e+06	1.35267e+06	2.39757e+06	4.46274e+06	2.75172e+06	2.81473e+06	87.3	71.8	29.7	-3.11	0.159
A0A0G2L7M3	Uncharacterized protein OS=Danio rerio OX=7955 PE=4 SV=1	2	0	1.36596e+06	2.09377e+06	2525616	1.90949e+06	889333	1.31667e+07	16555739	1.51329e+07	10137814	690340	3.52809e+06	5.6358e+06	4.23862e+06	4.5394e+06	3.22697e+06	1.3046e+07	1.47472e+07	1.37209e+07	9.8505e+06	75.6	17.2	16.5	1.22	0.513
A0A0H2UJM0	ERO1-like protein alpha OS=Danio rerio OX=7955 GN=ero1a PE=1 SV=1	1	0	0	0	9137376	0	0	0	591699	0	0	681136	800402	670354	437318	535360	519572	179557	527061	593752	124605	10.1	10.6	66.9	-1.44	0.0127
A0A0H2UJY3	DEAD (Asp-Glu-Ala-Asp) box helicase 3a OS=Danio rerio OX=7955 GN=ddx3a PE=1 SV=1	2	0	386223	0	3.93682e+06	0	258098	1.62627e+06	2.22522e+06	3.2658e+06	2.37576e+06	1.04583e+06	1.073e+06	797660	6.67068e+06	2.67577e+06	1.38422e+06	2.07139e+06	2.34669e+06	2.96108e+06	2.30843e+06	15.6	77.1	15.7	3.68	0.131
A0A0H2UKE5	Partner of Y14 and mago OS=Danio rerio OX=7955 GN=pym1 PE=1 SV=1	1	3.47357e+06	835066	3.38639e+06	0	0	0	0	0	0	1.00908e+06	7.38719e+06	2.04907e+06	8.16668e+06	380404	677884	469441	231444	167133	141126	980486	56.7	30	106	-11.5	0.0238
A0A0H2UKJ3	Striatin, calmodulin-binding protein OS=Danio rerio OX=7955 GN=strn PE=1 SV=1	1	121525	295829	0	0	0	0	405303	594343	445788	544629	258445	725902	295855	491885	708086	422314	401586	529416	404193	529193	60.9	27.6	15.7	1.27	0.435
A0A0H2UKN4	Utrophin OS=Danio rerio OX=7955 GN=utrn PE=1 SV=1	7	0	0	0	1.00965e+07	3.05126e+06	3.28356e+06	1.23212e+07	3.8543e+06	4.34075e+06	7.78267e+06	3.52588e+06	4.83864e+06	3.02586e+06	1.88765e+07	9.51783e+06	1.34219e+07	1.30959e+07	5.18156e+06	4.85737e+06	8.24188e+06	24.7	33.7	48.7	3.67	0.0082
A0A0N4SUA5	Catenin (cadherin-associated protein), beta 1 OS=Danio rerio OX=7955 GN=ctnnb1 PE=1 SV=1	89	4.17981e+08	2.2956e+08	2.04954e+08	3.14711e+08	5.78991e+08	9.84559e+08	1.2611e+10	1.39038e+10	1.37666e+10	1.29649e+10	8.87538e+08	5.96252e+08	5.55826e+08	6.33809e+08	1.14358e+09	2.92944e+09	1.25048e+10	1.24078e+10	1.25073e+10	1.2629e+10	26.6	76.8	0.724	2.31	0.275
A0A0R4I9A8	Heat shock protein beta-11 OS=Danio rerio OX=7955 GN=hspb11 PE=1 SV=1	5	7.33919e+06	5.8953e+06	8.8255e+06	81954094	1.06855e+07	6.04739e+06	3.11493e+06	3.22617e+07	4.74003e+07	3.80355e+07	1.62478e+07	1.57529e+07	2.17575e+07	1.25343e+08	2.09922e+07	1.14435e+08	3.57496e+07	2.89168e+07	4.42418e+07	3.81935e+07	18.6	66	17.2	4.85	0.145
A0A0R4I9B3	Calcium/calmodulin-dependent protein kinase type II delta 2 chain OS=Danio rerio OX=7955 GN=camk2d2 PE=1 SV=1	11	3.42882e+07	8.30236e+07	3.91955e+07	4.04416e+07	8.62942e+07	4.20296e+07	4.82979e+07	6.0995e+07	5.86792e+07	5.3648e+07	7.51805e+07	2.06493e+08	1.01567e+08	6.83376e+07	1.67383e+08	1.35971e+08	5.68399e+07	5.68934e+07	5.58575e+07	5.49947e+07	54.4	40.9	1.61	-1.03	0.992
A0A0R4I9C4	Triosephosphate isomerase OS=Danio rerio OX=7955 GN=tpi1b PE=1 SV=1	3	955132	941287	0	8.32403e+07	3.82865e+06	1.46313e+06	7.1366e+06	1.25154e+07	1.02567e+07	1.09595e+07	3.09564e+06	3.45652e+06	5.9859e+06	1.26826e+08	7.6861e+06	2.24649e+07	1.01327e+07	1.11482e+07	9.45082e+06	1.08899e+07	37.7	124	7.39	12.5	0.133
A0A0R4IA64	Eukaryotic translation elongation factor 1 delta a (guanine nucleotide exchange protein) OS=Danio rerio OX=7955 GN=eef1da PE=1 SV=1	3	894522	0	350872	0	217864	258141	1.87056e+06	1828372	1736812	1.94299e+06	2.51372e+06	1.29019e+06	1.69226e+06	1.81419e+06	1.71408e+06	1.77773e+06	2.41397e+06	2.278e+06	2.33769e+06	2.12314e+06	34	2.86	5.39	-1.04	0.991
A0A0R4IAJ9	Adducin 1 (alpha) OS=Danio rerio OX=7955 GN=add1 PE=1 SV=1	12	0	78353.1	880507	1.00838e+07	3117481	1.34931e+06	2.58499e+07	2.76133e+07	2.94493e+07	2.37524e+07	3.91303e+06	4.93327e+06	5.04941e+06	2.02723e+07	1.41295e+07	9.7477e+06	2.99545e+07	2.62263e+07	2.68337e+07	2.64563e+07	13.5	35.9	6.37	3.18	0.0225
A0A0R4IB50	Protein phosphatase 1, regulatory subunit 13Ba OS=Danio rerio OX=7955 GN=ppp1r13ba PE=4 SV=1	19	4.84185e+06	1.52924e+06	2.8788e+07	13235949	3.50972e+06	3.64546e+06	2.44595e+07	2.60644e+07	1.89126e+07	2.08884e+07	1.63624e+07	2.19032e+07	7.83558e+07	2e+07	3.54681e+07	2.12703e+07	3.19802e+07	2.55485e+07	2.20468e+07	2.3313e+07	88.2	33.6	17.2	-1.52	0.718
A0A0R4IBJ3	Adducin 3 (gamma) a OS=Danio rerio OX=7955 GN=add3a PE=1 SV=2	8	341230	0	372663	0	0	159647	6.97013e+06	5.27798e+06	7.2555e+06	4.5732e+06	5.33277e+06	3.04945e+06	2.93708e+06	4.27359e+06	4.61422e+06	3.81097e+06	8.65627e+06	7.91671e+06	8.31287e+06	8.72435e+06	35.8	9.52	4.41	1.12	0.52
A0A0R4IC54	Heat shock protein family, member 7 (cardiovascular) OS=Danio rerio OX=7955 GN=hspb7 PE=3 SV=1	2	584501	0	0	4.36278e+06	1.02228e+06	875942	2.53057e+06	4.11517e+06	3.37442e+06	3.79021e+06	1.68715e+06	527674	1.91596e+06	7.0438e+06	2.39926e+06	2.69508e+06	2.50736e+06	3.66562e+06	3.05956e+06	4.88669e+06	54.1	64.3	28.9	2.94	0.112
A0A0R4ICK7	Catalase OS=Danio rerio OX=7955 GN=cat PE=1 SV=1	2	1.11714e+06	743447	967285	5.78499e+06	4.97383e+06	834897	1.53348e+06	1.04362e+06	1.43918e+06	1.64887e+06	2.37581e+06	4.42893e+06	3.73775e+06	8.77012e+06	9.328e+06	2.56879e+06	1.51942e+06	1.70947e+06	2.29774e+06	1.60214e+06	29.7	54.5	19.8	1.96	0.318
A0A0R4ICQ1	NDRG family member 4 OS=Danio rerio OX=7955 GN=ndrg4 PE=1 SV=1	1	0	0	0	1.89101e+06	0	0	3745896	3.46147e+06	2.77444e+06	4060513	862080	684892	727247	2.8668e+06	754090	399237	3.71154e+06	3.08334e+06	2.51557e+06	3.94543e+06	12.2	99.6	19.5	1.77	0.728
A0A0R4ID72	Calcium/calmodulin-dependent protein kinase type II delta 1 chain OS=Danio rerio OX=7955 GN=camk2d1 PE=1 SV=1	1	1.29152e+06	0	0	0	357197	460330	1.38658e+06	1.80352e+06	2.22503e+06	2362406	2.74666e+06	906541	412668	603464	669892	1.41633e+06	1.37387e+06	1.6065e+06	2.01742e+06	2.29545e+06	90.8	50.3	22.6	-1.51	0.772
A0A0R4IDE1	Myotilin OS=Danio rerio OX=7955 GN=myot PE=4 SV=1	5	873723	1.58114e+06	6.46838e+06	0	1.40543e+06	0	1.49547e+07	1.26358e+07	11192417	1.19645e+07	6.02632e+06	7.55093e+06	1.75924e+07	3.0736e+06	5.15812e+06	3.28522e+06	1.53417e+07	1.15358e+07	1.07243e+07	1.19958e+07	60.5	29.9	16.4	-2.71	0.0896
A0A0R4IDK6	Nucleosome assembly protein 1-like 1 OS=Danio rerio OX=7955 GN=nap1l1 PE=1 SV=1	4	2.07825e+06	0	2.64571e+06	0	0	0	950329	1.59018e+06	970183	4.50751e+06	5.15296e+06	5.95257e+06	8.15224e+06	1.81697e+06	1.9799e+06	1.77414e+06	1.69194e+06	1.90656e+06	1.73958e+06	4.71626e+06	24.2	5.85	58.5	-3.46	0.00888
A0A0R4IDW8	Si:dkey-193i10.4 OS=Danio rerio OX=7955 GN=si:dkey-193i10.4 PE=4 SV=1	1	0	0	932479	0	840532	0	0	0	0	0	673557	1.05887e+06	2.24878e+06	605857	1.57635e+06	415015	583119	612419	193234	543393	61.9	71.9	40.4	-1.53	0.43
A0A0R4IDZ5	Lysine (K)-specific demethylase 3B OS=Danio rerio OX=7955 GN=kdm3b PE=1 SV=1	3	490036	0	5.32714e+06	0	1.16347e+06	0	4.02425e+06	2037667	1.48706e+06	1.52435e+06	1.34524e+06	2.84891e+06	1.38018e+07	1.48605e+06	3.00595e+06	1.37846e+06	4.13714e+06	1.99389e+06	1.34831e+06	1.48115e+06	113	46.5	57.8	-3.07	0.411
A0A0R4IEP3	Capping protein (actin filament) muscle Z-line, alpha 1b OS=Danio rerio OX=7955 GN=capza1b PE=1 SV=1	1	853265	0	645136	30315790	1.38408e+06	0	2.89942e+06	6.85662e+06	4687142	3.11015e+06	1.81462e+06	1.28591e+06	1.55582e+06	4.59592e+07	2.59573e+06	2.38369e+07	2.87283e+06	6.10759e+06	4.2498e+06	3.022e+06	17	89.9	36.8	15.5	0.123
A0A0R4IEQ5	Galectin OS=Danio rerio OX=7955 GN=lgals2a PE=1 SV=1	3	6.84239e+06	1.23086e+07	7.15319e+06	3.0728e+07	2.30137e+07	7.81877e+06	7.06131e+06	7.24574e+06	6.17136e+06	5.72268e+06	1.54773e+07	3.02026e+07	1.77493e+07	3.12287e+07	4.40343e+07	2.4795e+07	7.1232e+06	7.02586e+06	6.87759e+06	8.37202e+06	37.5	29.4	9.37	1.58	0.151
A0A0R4IET0	5'-nucleotidase, cytosolic IIa OS=Danio rerio OX=7955 GN=nt5c2a PE=1 SV=1	30	7.55054e+07	9.44221e+07	8.03524e+07	1.23549e+08	1.15177e+08	6.79111e+07	4.64618e+08	5.18324e+08	5.00946e+08	4.41773e+08	1.69243e+08	2.06799e+08	2.08584e+08	2.53092e+08	2.23453e+08	2.25455e+08	4.54155e+08	4.62951e+08	4.57459e+08	4.33027e+08	11.4	7.08	2.9	1.2	0.0943
A0A0R4IF18	ARVCF, delta catenin family member b OS=Danio rerio OX=7955 GN=arvcfb PE=1 SV=1	88	2.1351e+07	1.94782e+07	2.33943e+07	2.93394e+07	2.61083e+07	3.50828e+07	3.46048e+09	3.70362e+09	3.46153e+09	3.29832e+09	7.7307e+07	7.66163e+07	9.69308e+07	8.44816e+07	9.64262e+07	1.21245e+08	3.44509e+09	3.33586e+09	3.15804e+09	3.24472e+09	13.8	18.6	3.74	1.2	0.245
A0A0R4IFJ4	Pyruvate carboxylase OS=Danio rerio OX=7955 GN=pcxa PE=1 SV=1	97	5.86566e+09	4.71538e+09	5.05909e+09	9.06095e+09	7.5778e+09	4.70665e+09	6.67784e+09	7.49526e+09	7.44684e+09	6.41485e+09	1.24785e+10	1.17529e+10	1.21891e+10	1.37606e+10	1.42941e+10	1.44883e+10	6.62605e+09	6.67344e+09	6.75447e+09	6.24746e+09	3.01	2.66	3.42	1.17	0.00275
A0A0R4IG00	S-adenosylmethionine synthase OS=Danio rerio OX=7955 GN=mat2aa PE=1 SV=1	1	0	0	1.85196e+06	2.45884e+06	0	0	0	2.32818e+06	0	0	874942	520427	4.46621e+06	3.72764e+06	436466	464670	107372	2.07384e+06	206641	288383	112	123	140	-1.27	0.748
A0A0R4IGI1	Glyceraldehyde-3-phosphate dehydrogenase OS=Danio rerio OX=7955 GN=gapdh PE=1 SV=1	14	8.22296e+07	6.50462e+07	7.37185e+07	4.81267e+08	1.71188e+08	9.62435e+07	1.69242e+08	1.84169e+08	1.8084e+08	1.81665e+08	1.78109e+08	1.68137e+08	1.79812e+08	6.71754e+08	3.27876e+08	2.98868e+08	1.68495e+08	1.7101e+08	1.71499e+08	1.78942e+08	3.6	47.9	2.61	2.47	0.0816
A0A0R4IGQ8	Myomesin 1b OS=Danio rerio OX=7955 GN=myom1b PE=1 SV=1	51	3.54266e+07	4.73136e+07	3.30572e+07	3.43948e+07	1.64435e+07	2.29535e+07	1.67126e+08	1.85918e+08	1.57648e+08	1.54441e+08	9.52569e+07	1.58953e+08	1.12021e+08	7.43192e+07	7.96735e+07	8.97223e+07	1.70724e+08	1.73501e+08	1.54552e+08	1.60543e+08	27	9.63	5.36	-1.5	0.112
A0A0R4IGU0	Calponin OS=Danio rerio OX=7955 GN=cnn1b PE=1 SV=1	14	954374	664140	1.07108e+06	2.3626e+07	2.01089e+07	2.91024e+07	4.85649e+07	5.11381e+07	6.21287e+07	5.01849e+07	8.76825e+06	7.82988e+06	9.78142e+06	4.37472e+07	4.47794e+07	9.19416e+07	4.98107e+07	5.25983e+07	5.76271e+07	5.21925e+07	11.1	45.8	6.19	6.84	0.0123
A0A0R4IGV9	Paralemmin 2 OS=Danio rerio OX=7955 GN=palm2 PE=4 SV=1	4	3.46477e+06	4.67018e+06	3.54709e+06	3.75797e+06	3.51741e+06	2.52795e+06	7.64848e+06	9.31421e+06	6.42815e+06	5629565	8.86588e+06	1.19632e+07	9.60874e+06	1.26872e+07	7.91472e+06	9.1492e+06	1.1356e+07	8.89872e+06	7.71653e+06	6.00122e+06	15.9	25	26.5	-1.02	0.847
A0A0R4IGX4	Troponin I4a OS=Danio rerio OX=7955 GN=tnni4a PE=1 SV=1	2	0	33083178	22702424	0	0	0	0	31824034	31321008	0	6.12478e+07	8.17699e+07	5.49086e+07	1.37268e+06	1.06803e+06	1.2262e+06	3.34036e+07	2.89485e+07	2.85326e+07	2.87555e+07	21.3	12.5	7.81	-54	4.44e-05
A0A0R4IHT0	Solute carrier family 25 (aspartate/glutamate carrier), member 12 OS=Danio rerio OX=7955 GN=slc25a12 PE=1 SV=1	9	1.24631e+07	14835866	1.95684e+07	6.36353e+06	1.05788e+07	3.11e+06	1.48263e+07	1.37959e+07	1.70317e+07	1.79906e+07	3.43993e+07	3.74768e+07	4.77449e+07	1.21547e+07	2.21586e+07	1.33979e+07	1.59103e+07	1.57227e+07	1.82489e+07	1.93131e+07	17.5	34.3	10.2	-2.51	0.0201
A0A0R4IHT4	Rho-associated, coiled-coil-containing protein kinase 2a OS=Danio rerio OX=7955 GN=rock2a PE=1 SV=1	12	743455	3.23372e+06	0	7.51436e+06	0	400315	1.94121e+07	1.63877e+07	9.67673e+06	1.54445e+07	7.2975e+06	1.21432e+07	4.67733e+06	9.50442e+06	6.95817e+06	9.17438e+06	2.21606e+07	1.73081e+07	2.25737e+07	2.4448e+07	47.1	16.2	14.1	1.06	0.699
A0A0R4IHV1	Pyruvate kinase OS=Danio rerio OX=7955 GN=pkmb PE=1 SV=1	2	947535	0	1325626	5.67062e+07	3.68297e+06	325675	3.5306e+06	7.85619e+06	4.83686e+06	4.92146e+06	2.65779e+06	1.64697e+06	3.38881e+06	8.59675e+07	6.90709e+06	2.02425e+07	3.49822e+06	6.99797e+06	4.38555e+06	4.78198e+06	34.1	112	30.3	14.7	0.0825
A0A0R4II61	Axin-1 OS=Danio rerio OX=7955 GN=axin1 PE=4 SV=1	3	1964325	1.17482e+06	5.683e+06	1.19962e+06	4.35483e+06	0	2.61334e+06	4.15046e+06	1.53559e+06	2.99821e+06	5.06177e+06	3.30412e+06	1.43051e+07	3.14834e+06	9.35183e+06	5.87409e+06	3.06257e+06	4.09722e+06	2.6126e+06	2.91324e+06	78.2	50.8	20.3	-1.23	0.851
A0A0R4II85	Pleckstrin homology domain-containing, family A member 7a OS=Danio rerio OX=7955 GN=plekha7a PE=4 SV=1	81	78420329	1.67952e+08	1.07952e+08	8.56027e+07	8.28374e+07	9.07961e+07	1.77465e+09	1.99664e+09	2.00188e+09	1.76691e+09	1.99366e+08	4.44718e+08	3.03169e+08	1.72455e+08	2.00061e+08	2.88719e+08	1.76897e+09	1.77908e+09	1.82376e+09	1.72229e+09	39	27.6	2.35	-1.43	0.309
A0A0R4IIA6	Si:ch73-43g23.1 OS=Danio rerio OX=7955 GN=si:ch73-43g23.1 PE=4 SV=1	6	485358	0	0	2632821	0	0	1.44578e+06	2.76324e+06	4.23433e+06	3.11455e+06	3.12408e+06	2.18204e+06	3.7657e+06	6.24102e+06	3.55618e+06	3.34427e+06	3.98306e+06	3.86384e+06	4.62238e+06	3.82021e+06	26.3	36.9	9.16	1.45	0.241
A0A0R4IIU9	Zgc:172323 OS=Danio rerio OX=7955 GN=zgc:172323 PE=1 SV=1	5	2.40355e+06	1.10348e+08	3.68066e+06	3.19623e+06	2779267	2.30505e+06	9072986	11556599	1.20438e+07	1.21283e+07	1.42783e+07	2.71983e+08	1.04667e+07	6.36103e+06	7.54861e+06	9.42433e+06	9.44589e+06	1.09745e+07	1.12937e+07	1.22815e+07	152	19.9	10.7	-12.7	0.285
A0A0R4IJ08	Spectrin alpha 2 OS=Danio rerio OX=7955 GN=sptan1 PE=1 SV=1	30	2.17848e+07	1.03935e+07	9.12082e+06	4.05237e+07	19827062	4.66981e+06	3.47479e+07	4.55616e+07	4.28804e+07	4.00576e+07	5.64742e+07	4.12962e+07	3.38449e+07	7.59494e+07	5.36688e+07	2.99475e+07	4.07726e+07	4.91656e+07	4.62864e+07	4.24271e+07	26.3	43.3	8.48	1.21	0.67
A0A0R4IJ71	Plectin b OS=Danio rerio OX=7955 GN=plecb PE=1 SV=1	17	1.77138e+06	583414	3.32492e+06	6.91885e+07	2.48341e+06	435608	9.14268e+06	1.25249e+07	1.06309e+07	1.35287e+07	1.16435e+07	8.9772e+06	1.50743e+07	3.80725e+07	1.23381e+07	1.12039e+07	1.50938e+07	1.56921e+07	1.25778e+07	1.6935e+07	25.7	74	12.2	1.73	0.42
A0A0R4IJ91	Sarcolemma-associated protein a OS=Danio rerio OX=7955 GN=slmapa PE=1 SV=1	1	0	0	0	0	0	0	0	0	0	0	147928	139001	163774	460586	426527	552979	211800	366996	421052	107670	8.35	13.6	51.8	3.2	0.000594
A0A0R4IJR5	Isocitrate dehydrogenase [NAD] subunit, mitochondrial OS=Danio rerio OX=7955 GN=idh3g PE=1 SV=1	1	0	0	0	0	0	503368	0	0	0	0	375075	330193	201254	399848	555591	1.54875e+06	361101	116670	167567	384952	29.9	74.7	52.5	2.76	0.153
A0A0R4IJT7	Hexokinase 1 OS=Danio rerio OX=7955 GN=hk1 PE=1 SV=1	11	1.26314e+07	2.06052e+07	1.08971e+07	6.17083e+06	6.49657e+06	6.03181e+06	1.56896e+07	3.16985e+07	2.12437e+07	2.15832e+07	2.89318e+07	5.18141e+07	3.79961e+07	1.44125e+07	1.54141e+07	2.16214e+07	2.2454e+07	2.8836e+07	2.16344e+07	2.31423e+07	29.1	22.8	13.6	-2.31	0.0199
A0A0R4IJT8	Chaperonin-containing TCP1, subunit 8 (theta) OS=Danio rerio OX=7955 GN=cct8 PE=1 SV=1	3	0	1.08496e+06	0	1.15777e+06	0	1.41942e+06	2.76398e+06	3.41861e+06	9.04169e+06	5.05561e+06	757040	4.09706e+06	1.94941e+06	2.75335e+06	2.08584e+06	4.78108e+06	9.23467e+06	7.89778e+06	8.19804e+06	7.28063e+06	74.6	43.8	10	1.41	0.425
A0A0R4IKN2	Talin 2a OS=Danio rerio OX=7955 GN=tln2a PE=1 SV=1	11	0	2.40178e+06	0	0	0	1415101	6.33454e+06	2.0518e+06	8319870	7.43093e+06	6.13476e+06	9.54194e+06	5.4597e+06	6.37653e+06	7.42184e+06	1.0942e+07	8.80307e+06	1.12328e+07	1.00134e+07	1.16958e+07	31.1	29	12.5	1.17	0.53
A0A0R4ILB5	Sarcolemma-associated protein b OS=Danio rerio OX=7955 GN=slmapb PE=1 SV=1	4	677690	0	881445	7.04075e+06	1.84334e+06	2.81068e+06	719740	2.13913e+06	1.86252e+06	2.1381e+06	1.88178e+06	1.49023e+06	2.68281e+06	1.13387e+07	4.80503e+06	9.21831e+06	1.87655e+06	3.02509e+06	3.11526e+06	2.52171e+06	30.1	39.4	21.6	4.19	0.0148
A0A0R4ILH3	Atlastin GTPase 2 OS=Danio rerio OX=7955 GN=atl2 PE=1 SV=1	1	781768	897571	638673	1323995	1.36638e+06	1.19252e+06	0	988630	0	598947	1.66257e+06	2.20245e+06	1.54023e+06	2.0072e+06	2.56252e+06	3.66911e+06	883830	880631	919822	581972	19.6	30.8	19.3	1.52	0.136
A0A0R4IM23	Thioredoxin-related transmembrane protein 4 OS=Danio rerio OX=7955 GN=tmx4 PE=1 SV=1	1	491963	0	2028773	1.86889e+06	1.91416e+06	726328	2.87928e+06	1.36338e+06	0	1.40465e+06	1.04625e+06	836141	4.89262e+06	2.83326e+06	3.58985e+06	2.23475e+06	2.85288e+06	1.21445e+06	2.23783e+06	1.36484e+06	101	23.5	40.1	1.28	0.423
A0A0R4IMF6	Eukaryotic translation initiation factor 4Ba OS=Danio rerio OX=7955 GN=eif4ba PE=1 SV=1	2	0	0	0	0	0	0	0	0	0	1.23569e+06	483923	1.75974e+06	459725	982426	866636	1.17809e+06	1.04336e+06	521241	277770	1.36914e+06	82.5	15.6	61.6	1.12	0.552
A0A0R4IMH7	Zinc finger, SWIM-type-containing 8 OS=Danio rerio OX=7955 GN=zswim8 PE=1 SV=2	3	537942	441442	1.20328e+06	1.98535e+06	1.72805e+06	576064	1.43199e+06	0	344099	472691	2.33441e+06	1.66546e+06	4.26777e+06	3.61923e+06	3.82e+06	3.1761e+06	2.26801e+06	898917	898710	1.08365e+06	49	9.31	51.2	1.28	0.36
A0A0R4IMS3	60S ribosomal protein L24 OS=Danio rerio OX=7955 GN=rpl24 PE=1 SV=1	2	0	0	0	0	0	0	978479	936880	2.75254e+06	911174	777911	712723	2.36135e+06	1.28248e+06	1.50753e+06	801237	1.52654e+06	989497	2.49571e+06	1.01544e+06	72.7	30.1	46.7	-1.07	0.905
A0A0R4IN28	Uncharacterized protein OS=Danio rerio OX=7955 GN=si:ch211-173b16.3 PE=4 SV=1	3	0	621344	2.48572e+06	4.51845e+06	0	1.48922e+06	910690	0	928440	2323427	5.36235e+06	2.83556e+06	6.55765e+06	7.76486e+06	5.56622e+06	6.02537e+06	2.33135e+06	2.1184e+06	2.5241e+06	2.45711e+06	38.6	18	7.57	1.31	0.335
A0A0R4INA4	Non-specific serine/threonine protein kinase OS=Danio rerio OX=7955 GN=pak4 PE=1 SV=1	1	0	0	0	0	0	0	0	766517	0	0	371858	242884	223026	361497	453446	811093	304431	682782	226773	224611	28.9	43.8	60.8	1.94	0.105
A0A0R4INC0	Echinoderm microtubule-associated protein-like 1 OS=Danio rerio OX=7955 GN=eml1 PE=4 SV=1	4	0	5.63043e+06	3514364	0	4.71402e+06	93228.8	5.71435e+06	2.5488e+06	2.56899e+06	4.35418e+06	1.63636e+07	1.47072e+07	9.9155e+06	2.01813e+06	2.7045e+06	1.62691e+06	9.2042e+06	5.47771e+06	9.67607e+06	6.18204e+06	24.5	25.8	27.7	-6.46	0.000925
A0A0R4IND9	Epiplakin 1 OS=Danio rerio OX=7955 GN=eppk1 PE=1 SV=1	2	1.97651e+06	2.78244e+06	649733	1.08424e+06	1.11721e+06	598437	2.54046e+06	1.92423e+06	1687210	2.97309e+06	4.20342e+06	6.82751e+06	3.9267e+06	2.22529e+06	2.80782e+06	2.53177e+06	2.51717e+06	2.56811e+06	2.53736e+06	2.88883e+06	32.1	11.6	6.67	-1.98	0.0496
A0A0R4INF9	Syntaxin-binding protein 3 OS=Danio rerio OX=7955 GN=stxbp3 PE=1 SV=1	6	0	6404742	0	0	0	0	800634	5.23912e+06	7083418	3.18955e+06	1.77723e+06	2.63382e+06	3.88907e+06	3.34599e+06	3.9315e+06	3.87469e+06	4.3796e+06	5.61711e+06	6.5746e+06	4.4568e+06	38.4	8.69	19.9	1.34	0.266
A0A0R4INP3	Myomesin 2a OS=Danio rerio OX=7955 GN=myom2a PE=1 SV=1	28	5.71692e+07	4.90108e+07	3.06558e+07	4.31614e+07	3.21164e+07	1.88395e+07	7.56817e+07	81487156	1.08173e+08	99431066	1.33457e+08	1.0863e+08	8.58563e+07	7.46528e+07	7.44466e+07	9.4516e+07	8.02176e+07	8.60987e+07	1.01858e+08	1.02956e+08	21.8	14.2	12.3	-1.35	0.142
A0A0R4IP09	Pleckstrin homology domain-containing, family A member 6 OS=Danio rerio OX=7955 GN=plekha6 PE=1 SV=1	67	3.04896e+08	2.24544e+08	1.50771e+08	144622946	1.72249e+08	7.8776e+07	5.5045e+08	5.71996e+08	5.13378e+08	5.5878e+08	6.72297e+08	5.85387e+08	4.54282e+08	2.40414e+08	3.58788e+08	3.16443e+08	5.5343e+08	5.18666e+08	4.69706e+08	5.51312e+08	19.2	19.7	7.47	-1.87	0.0191
A0A0R4IP30	Sorbin and SH3 domain-containing 1 OS=Danio rerio OX=7955 GN=sorbs1 PE=1 SV=1	60	1.03282e+08	9.82174e+07	1.48682e+08	6.71587e+07	5.6655e+07	5.79072e+07	1.02689e+09	1.08977e+09	1.10096e+09	9.89808e+08	2.3524e+08	2.80736e+08	3.77199e+08	1.23726e+08	1.31214e+08	2.07415e+08	1.03765e+09	9.87237e+08	9.99206e+08	9.64198e+08	24.3	30	3.08	-1.93	0.0368
A0A0R4IPH0	Phosphatase and actin regulator 4A OS=Danio rerio OX=7955 GN=phactr4a PE=4 SV=1	6	8.78789e+06	6410038	3.57649e+06	13157883	1.17907e+07	5.39045e+06	7.84583e+06	8.65471e+06	1.04701e+07	9.24245e+06	1.94263e+07	1.70566e+07	1.00111e+07	2.49206e+07	2.35871e+07	9.68975e+06	1.03856e+07	1.05404e+07	1.02219e+07	9.429e+06	31.6	43.5	4.87	1.25	0.653
A0A0R4IPH2	Tubulin beta chain OS=Danio rerio OX=7955 GN=tubb2b PE=1 SV=1	1	0	0	0	4183941	2560686	1.84776e+06	1.12761e+06	1.38687e+06	0	1.23473e+06	142881	196871	757137	6.34292e+06	4.80235e+06	5.68513e+06	1.11727e+06	1.23537e+06	1.95049e+06	1.19973e+06	93	13.8	28.1	15.3	0.0254
A0A0R4IPK3	Myomesin 2a (Fragment) OS=Danio rerio OX=7955 GN=myom2a PE=1 SV=1	1	0	0	0	0	0	0	844804	1710704	1.93066e+06	1.65751e+06	135807	213595	471488	456539	725308	705858	837057	1.52382e+06	1.75052e+06	1.61053e+06	64.2	23.8	28.4	2.3	0.106
A0A0R4IPV5	Protein disulfide-isomerase OS=Danio rerio OX=7955 GN=p4hb PE=1 SV=1	1	3.80932e+07	48667932	32741820	54980685	28089876	21119736	35882056	41104348	39185844	36215664	8.10121e+07	1.19421e+08	7.89606e+07	8.33515e+07	5.26802e+07	6.49806e+07	3.5553e+07	3.66141e+07	3.55295e+07	3.51893e+07	24.5	23	1.73	-1.39	0.156
A0A0R4IQ97	Proliferation-associated 2G4, a OS=Danio rerio OX=7955 GN=pa2g4a PE=1 SV=1	1	0	0	0	2111425	0	0	0	0	0	0	800846	158744	935961	3.20095e+06	362555	576060	253019	238108	238774	355769	65.7	115	20.9	2.18	0.546
A0A0R4IQH8	Chaperonin-containing TCP1, subunit 6A (zeta 1) OS=Danio rerio OX=7955 GN=cct6a PE=1 SV=1	1	0	0	0	1.79082e+06	0	0	0	0	0	0	321955	635322	252915	2.71492e+06	490372	732061	325497	362249	321793	361567	50.5	93	6.46	3.25	0.192
A0A0R4IQN8	Nascent polypeptide-associated complex subunit alpha OS=Danio rerio OX=7955 GN=naca PE=1 SV=1	43	7.08376e+07	7.59459e+07	9.38341e+07	3.37733e+08	5.86618e+07	3.71346e+07	2.52042e+08	2.91416e+08	3.13603e+08	3.01931e+08	1.70187e+08	2.07181e+08	2.46715e+08	4.96961e+08	1.35244e+08	1.3192e+08	2.5524e+08	2.65008e+08	2.87531e+08	2.97843e+08	18.4	82.4	7.12	1.22	0.99
A0A0R4IRD7	Copine I OS=Danio rerio OX=7955 GN=cpne1 PE=1 SV=1	1	0	0	0	2.80854e+06	925111	554156	0	0	0	0	263239	266268	725789	4.25779e+06	1.73497e+06	1.70501e+06	531846	210984	215658	383968	63.6	57.1	45.8	6.13	0.0156
A0A0R4IS11	Shroom family member 3 OS=Danio rerio OX=7955 GN=shroom3 PE=4 SV=1	4	0	0	0	0	0	0	7.1552e+06	7.28828e+06	8.39973e+06	6.08663e+06	1.37798e+06	978224	2.23394e+06	1.7427e+06	3.06674e+06	1.92885e+06	7.08959e+06	6.75484e+06	7.72466e+06	6.96154e+06	41.9	31.9	5.86	1.47	0.244
A0A0R4IS33	TAR DNA-binding protein OS=Danio rerio OX=7955 GN=tardbp PE=1 SV=1	2	0	0	0	3.49142e+06	612019	0	0	956731	706710	1.32216e+06	1.19907e+06	1.06047e+06	471129	5.29305e+06	1.73271e+06	3.0255e+06	1.08696e+06	1.0033e+06	825525	1.55029e+06	42.5	53.8	27.7	3.68	0.0431
A0A0R4IS57	SPEG complex locus a OS=Danio rerio OX=7955 GN=spega PE=4 SV=1	2	0	0	0	0	0	0	1.33366e+06	0	677704	0	606529	289275	543054	812681	1.46295e+06	1.26582e+06	1.32143e+06	915899	1.15302e+06	755190	35	28.2	24.2	2.46	0.0372
A0A0R4IS70	Purine-rich element-binding protein Ba OS=Danio rerio OX=7955 GN=purba PE=1 SV=1	1	0	0	0	0	0	0	0	0	0	0	861870	372119	1.20112e+06	680503	360840	669474	220892	292745	201295	213903	51.3	31.8	17.7	-1.42	0.531
A0A0R4ISC7	Proteasome subunit alpha type OS=Danio rerio OX=7955 GN=psma6b PE=1 SV=1	2	4.34926e+06	0	0	2.11952e+07	3.7737e+06	0	0	1.86571e+06	2.7741e+06	2.45982e+06	1.22595e+06	1.40495e+06	1.52728e+06	9.0986e+06	7.48771e+06	8.36588e+06	2.26823e+06	1.86915e+06	2.62217e+06	2.94124e+06	10.9	9.7	19	6	3.44e-05
A0A0R4ISK8	KH domain-containing, RNA-binding, signal transduction-associated 1a OS=Danio rerio OX=7955 GN=khdrbs1a PE=1 SV=1	2	0	0	0	364382	640759	267136	948127	1.53385e+06	1.95959e+06	2.41468e+06	716413	721525	735495	913030	1.66646e+06	1.18515e+06	1.9129e+06	2.36402e+06	1.77675e+06	2.34624e+06	1.36	30.4	14.3	1.73	0.0963
A0A0R4ISM7	Paralemmin 2 OS=Danio rerio OX=7955 GN=palm2 PE=1 SV=1	24	1.07516e+07	1.49049e+07	1.76892e+07	2.00017e+07	8.32681e+06	6.20359e+06	7.54888e+07	7.21115e+07	7.16105e+07	6.49459e+07	5.23039e+07	5.2854e+07	5.12075e+07	3.91462e+07	2.61875e+07	3.08103e+07	7.6511e+07	6.93959e+07	6.65046e+07	6.52134e+07	1.61	20.5	7.27	-1.63	0.0496
A0A0R4IT09	Pyruvate dehydrogenase E1 component subunit alpha OS=Danio rerio OX=7955 GN=pdha1a PE=1 SV=1	8	2.62546e+07	9096564	1.57801e+07	1.52642e+07	1.32346e+07	3.74478e+06	1.66652e+07	1.6755e+07	1.65158e+07	1.72637e+07	4.17198e+07	2.29986e+07	3.96243e+07	2.6448e+07	2.6185e+07	1.45468e+07	1.81007e+07	1.53292e+07	1.63546e+07	1.94282e+07	29.5	30.4	10.5	-1.55	0.182
A0A0R4ITA7	Interferon regulatory factor 2-binding protein 2-B OS=Danio rerio OX=7955 GN=irf2bp2b PE=1 SV=1	1	0	0	0	0	0	0	0	0	0	0	444434	644462	1.01313e+06	430098	504569	667287	135043	180067	116109	373163	41.2	22.7	58.6	-1.31	0.454
A0A0R4ITF0	Starch-binding domain 1 OS=Danio rerio OX=7955 GN=stbd1 PE=4 SV=1	6	1.34778e+07	1.25576e+07	7.75857e+06	2.34395e+07	1.82361e+07	1.37902e+07	6.5676e+06	7.7527e+06	8.70639e+06	7208531	2.90701e+07	3.16552e+07	2.18009e+07	3.55347e+07	3.42002e+07	4.24292e+07	8.11787e+06	7.87578e+06	9.30695e+06	7.55269e+06	18.6	11.8	9.31	1.36	0.0893
A0A0R4ITT8	LIM domain 7a OS=Danio rerio OX=7955 GN=lmo7a PE=4 SV=1	22	1.78327e+06	8.41503e+06	838049	7.27606e+06	1.5694e+06	1.42092e+06	3.21415e+07	4.31566e+07	4.14412e+07	4.04308e+07	1.56975e+07	2.96147e+07	1.2515e+07	1.60927e+07	1.70792e+07	1.5587e+07	4.64366e+07	4.21839e+07	4.58714e+07	4.60737e+07	47.2	4.67	4.4	-1.19	0.731
A0A0R4IUG8	Protein phosphatase 1, regulatory subunit 13Bb OS=Danio rerio OX=7955 GN=ppp1r13bb PE=1 SV=1	1	256210	0	0	0	0	0	0	0	0	0	544878	1.0186e+06	360176	449721	706750	771684	192076	158002	448639	386700	53	26.5	48.3	1	0.856
A0A0R4IUH6	NADH dehydrogenase (ubiquinone) 1 alpha subcomplex 4,-like OS=Danio rerio OX=7955 GN=ndufa4l PE=1 SV=1	2	0	0	591323	0	0	5389762	1.04833e+07	1.33497e+07	13111147	9199500	1.29553e+06	715509	1.72947e+06	1.22251e+06	744226	1.41428e+06	1.03872e+07	1.18913e+07	1.28307e+07	1.09341e+07	40.8	30.6	9.36	-1.11	0.833
A0A0R4IUS4	Filamin C, gamma a (actin-binding protein 280) OS=Danio rerio OX=7955 GN=flnca PE=1 SV=1	47	3.48613e+07	5.39722e+07	3.49912e+07	67474687	3.45724e+07	2.96314e+07	1.14271e+08	1.22465e+08	1.28698e+08	1.26265e+08	9.87624e+07	1.63024e+08	1.14474e+08	1.43163e+08	8.9045e+07	1.07572e+08	1.24359e+08	1.24325e+08	1.22509e+08	1.25833e+08	26.7	24.3	1.1	-1.11	0.653
A0A0R4IV39	Catenin (cadherin-associated protein), delta 1 OS=Danio rerio OX=7955 GN=ctnnd1 PE=1 SV=1	7	7.72448e+06	4868326	7.83773e+06	0	680859	2.9517e+06	4.9271e+06	3.20218e+06	9.24059e+06	1.8472e+06	1.86302e+07	1.47236e+07	2.29679e+07	3.41841e+06	4.37579e+06	4.46408e+06	5.55448e+06	6.19683e+06	1.00396e+07	6.31239e+06	22	14.2	29	-4.59	0.00116
A0A0R4IVE2	Ubiquitin-specific peptidase 10 OS=Danio rerio OX=7955 GN=usp10 PE=1 SV=1	1	0	0	0	9720141	2326454	0	0	0	0	0	542733	502109	208631	1.47359e+07	4.36307e+06	1.06295e+07	209401	552508	344773	180886	43.6	52.7	52.7	23.7	0.00304
A0A0R4IVZ0	Nucleoporin 153 OS=Danio rerio OX=7955 GN=nup153 PE=1 SV=1	3	3.56897e+06	5.84322e+06	5.26961e+06	6564639	6393279	0	14342911	8.61658e+06	5.24814e+06	0	8.63013e+06	1.46982e+07	1.42937e+07	1.11066e+07	1.31178e+07	1.33413e+07	1.42114e+07	8.23656e+06	5.32246e+06	1.03645e+07	27.1	9.83	39.2	-1	0.909
A0A0R4IW20	Synaptosomal-associated protein OS=Danio rerio OX=7955 GN=snap23.1 PE=1 SV=1	3	0	13035525	0	2.84874e+06	0	0	0	0	0	0	2.02808e+06	646119	1.78309e+06	5.10501e+06	1.78404e+06	1.67068e+06	944468	694006	488673	945490	49.6	68.4	28.7	1.92	0.289
A0A0R4IW85	Sorbin and SH3 domain-containing 2b OS=Danio rerio OX=7955 GN=sorbs2b PE=4 SV=1	46	4.6135e+08	306309999	8.62319e+07	49074526	5.18601e+07	1.09603e+08	4.94348e+08	5.53233e+08	5.3872e+08	5.27973e+08	1.00434e+09	7.67723e+08	2.32699e+08	1.03322e+08	1.23176e+08	3.64875e+08	4.98437e+08	4.97614e+08	4.91311e+08	5.08899e+08	59.2	73.9	1.46	-3.39	0.113
A0A0R4IWD0	LIM domain-binding 3b (Fragment) OS=Danio rerio OX=7955 GN=ldb3b PE=1 SV=1	2	0	0	0	0	0	916743	6506372	12318457	7.76942e+06	9.43257e+06	798135	1.01294e+06	625450	690476	1.11991e+06	3.27165e+06	9.3198e+06	1.09728e+07	7.04448e+06	9.16524e+06	23.9	81.6	17.6	2.09	0.364
A0A0R4IXA9	Adenylyl cyclase-associated protein OS=Danio rerio OX=7955 GN=cap2 PE=3 SV=1	4	0	0	0	8609238	1703114	2.5734e+06	2.78428e+06	1.5012e+06	1.11552e+06	3.00556e+06	1.50627e+06	2.50965e+06	3.80966e+06	1.75853e+07	8.44891e+06	8.35729e+06	4.97168e+06	4.02575e+06	2.79726e+06	3.81833e+06	44.3	46.2	22.9	4.39	0.0153
A0A0R4IXC8	Tubulin beta chain OS=Danio rerio OX=7955 GN=tubb6 PE=1 SV=1	2	0	0	3.28954e+06	1.67464e+07	2.34917e+06	0	0	1.10199e+06	743118	472101	2.28346e+06	1.34686e+06	8.55086e+06	2.53878e+07	4.40566e+06	1.07484e+07	1.26226e+06	1.13186e+06	826586	730230	96.5	79.6	25.4	3.33	0.164
A0A0R4IXD8	Dynein, cytoplasmic 1, intermediate chain 2b OS=Danio rerio OX=7955 GN=dync1i2b PE=1 SV=1	2	0	0	494170	820222	0	0	1429801	0	470911	0	451496	339789	1.39964e+06	1.60528e+06	1.17292e+06	1.56018e+06	1.86779e+06	716148	738164	455102	79.7	16.4	66.6	1.98	0.176
A0A0R4IXJ5	Actin-binding LIM protein family, member 3 OS=Danio rerio OX=7955 GN=ablim3 PE=4 SV=1	2	0	0	0	0	0	0	378904	407366	0	0	1.33004e+06	618412	1.84061e+06	856979	1.45179e+06	1.63257e+06	740356	767254	947804	567959	48.6	30.9	20.6	1.04	0.811
A0A0R4IXL8	Talin 1 OS=Danio rerio OX=7955 GN=tln1 PE=1 SV=1	41	2.13725e+07	2.6179e+07	3.44476e+07	1.36587e+08	2.83229e+07	1.34042e+07	80719827	9.69938e+07	97518958	8.03447e+07	6.54331e+07	8.19067e+07	1.14101e+08	2.1707e+08	7.60464e+07	6.53909e+07	8.58177e+07	9.24301e+07	9.48813e+07	8.9755e+07	28.4	70.8	4.28	1.37	0.679
A0A0R4IXW8	Capping protein (actin filament) muscle Z-line, beta OS=Danio rerio OX=7955 GN=capzb PE=1 SV=1	4	6.84214e+06	3824218	4056643	4.71393e+07	1.15518e+07	2925417	7.48704e+06	1.84808e+07	1.43179e+07	1.28542e+07	1.54565e+07	1.05635e+07	1.10708e+07	4.77741e+07	2.2857e+07	1.00211e+07	1.17247e+07	1.6462e+07	1.2982e+07	1.24899e+07	21.8	71.4	15.6	2.17	0.313
A0A0R4IYF8	Protein phosphatase, Mg2+/Mn2+-dependent, 1Aa OS=Danio rerio OX=7955 GN=ppm1aa PE=1 SV=1	1	908091	607893	681539	1.4408e+06	672923	581308	1.27799e+06	1.43215e+06	1.53457e+06	1.35826e+06	1.93122e+06	1.49164e+06	1.64361e+06	2.18427e+06	1.26201e+06	1.78855e+06	1.26627e+06	1.2757e+06	1.39139e+06	1.31977e+06	13.2	26.5	4.34	1.03	0.944
A0A0R4IYU1	Fumarate hydratase, mitochondrial OS=Danio rerio OX=7955 GN=fh PE=1 SV=1	1	565023	0	0	315157	0	0	384436	0	809837	0	1.20162e+06	1.06833e+06	1.10574e+06	477783	503541	441953	380911	408152	734274	452525	6.11	6.52	33	-2.37	7.77e-05
A0A0R4IYX3	Protein phosphatase 1 regulatory subunit 12A OS=Danio rerio OX=7955 GN=ppp1r12a PE=1 SV=1	9	0	0	0	0	0	0	4.5744e+06	4564830	6.46652e+06	4.9993e+06	2.70327e+06	3.46035e+06	4.17691e+06	4.54613e+06	5.09939e+06	5.84163e+06	5.44673e+06	5.47318e+06	7.73341e+06	5.48494e+06	21.4	12.6	18.8	1.5	0.0605
A0A0R4IZ33	Toll-interacting protein OS=Danio rerio OX=7955 GN=tollip PE=1 SV=1	1	3.11926e+06	0	0	5860678	1.13508e+06	0	846390	0	0	0	6.63368e+06	209992	911825	8.88487e+06	2.12874e+06	7.56227e+06	838628	220068	379050	187091	136	57.8	73.9	2.4	0.254
A0A0R4J7R2	Myosin XVIIIAa OS=Danio rerio OX=7955 GN=myo18aa PE=3 SV=1	1	0	0	0	0	0	0	0	0	314765	0	1.09509e+06	477911	456303	604961	429563	384924	232960	603583	285395	178557	53.6	24.6	58.7	-1.43	0.428
A0A0S2I7K2	Vinculin b OS=Danio rerio OX=7955 GN=vclb PE=2 SV=1	35	3.83176e+07	2.12716e+07	4.03212e+07	7.31088e+07	2.59703e+07	1.22935e+07	9.72598e+07	1.15631e+08	1.25013e+08	9.74307e+07	9.29382e+07	6.73909e+07	1.12399e+08	1.35306e+08	6.40434e+07	6.6163e+07	1.01956e+08	1.05642e+08	1.17006e+08	1.02429e+08	24.8	45.8	6.58	-1.03	0.825
A0A140LG98	Sorbin and SH3 domain-containing 1 (Fragment) OS=Danio rerio OX=7955 GN=sorbs1 PE=4 SV=1	2	6.12333e+06	3.94453e+06	0	3994278	3.45203e+06	2.2816e+06	4.76726e+07	5.16878e+07	5.55225e+07	5.3756e+07	1.31651e+07	1.02468e+07	1.17749e+07	6.69421e+06	6.84762e+06	7.74416e+06	4.72354e+07	4.60414e+07	5.03419e+07	5.22325e+07	12.4	7.99	5.79	-1.65	0.00727
A0A140LGV0	Plastin-2 OS=Danio rerio OX=7955 GN=lcp1 PE=1 SV=1	2	0	1.3995e+06	0	85797736	0	0	9466932	1.17966e+07	4663392	5.21338e+06	1.24904e+06	3.66219e+06	1.36367e+06	698761	1.23782e+06	818904	9.38012e+06	1.05079e+07	8.31428e+06	5.06563e+06	65.1	30.8	28.2	-2.28	0.158
A0A1D5NS76	Tight junction protein 1b OS=Danio rerio OX=7955 GN=tjp1b PE=1 SV=1	13	1.17244e+06	2.1564e+07	247687	9644051	1384988	121228	1.11304e+07	1.50635e+07	1.79088e+07	1.3875e+07	5.67563e+06	5.85384e+07	1.1781e+07	1.97763e+07	8.7621e+06	1.14225e+07	1.78438e+07	1.82556e+07	1.98455e+07	1.64852e+07	114	43.1	7.64	-1.9	0.78
A0A1D5NSN9	Tight junction protein 1a (Fragment) OS=Danio rerio OX=7955 GN=tjp1a PE=1 SV=1	2	0	0	0	0	0	0	1.9558e+06	3.26207e+06	2.97409e+06	2.04155e+06	600044	1.06187e+06	1.73866e+06	1.35899e+06	1.149e+06	1.0978e+06	2.66819e+06	2.90572e+06	2.69659e+06	2.83795e+06	50.5	11.5	4.08	1.06	0.685
A0A1D5NSS7	Thyroid hormone receptor interactor 6 OS=Danio rerio OX=7955 GN=trip6 PE=1 SV=1	12	0	0	0	0	0	1.318e+06	41354032	3.59139e+07	4.25699e+07	3.6968e+07	5.96136e+06	4.19906e+06	5.24133e+06	6.30421e+06	7.23424e+06	1.06226e+07	3.66255e+07	3.28335e+07	3.98169e+07	3.67467e+07	17.3	28.2	7.83	1.57	0.0905
A0A1L1QZF0	Protein scribble homolog OS=Danio rerio OX=7955 GN=scrib PE=1 SV=1	24	4071118	1.28163e+06	11532987	1.74856e+07	2.45782e+06	3.39454e+06	1.76956e+07	4.94541e+07	3.34515e+07	29421066	2.76246e+07	1.26082e+07	4.15995e+07	2.95817e+07	2.66827e+07	2.95656e+07	3.5914e+07	4.89035e+07	3.77149e+07	3.70273e+07	53.2	5.83	15.2	1.05	0.695
A0A1L1QZN5	Cortactin OS=Danio rerio OX=7955 GN=cttn PE=1 SV=1	19	3.19577e+07	1.77908e+07	3.57798e+07	4.7558e+07	8.8627e+07	1.66703e+07	9.14285e+07	8.20427e+07	7.67147e+07	7.28335e+07	7.58713e+07	5.19552e+07	9.21775e+07	7.77856e+07	1.77973e+08	5.51163e+07	9.14486e+07	7.40556e+07	7.04262e+07	7.73826e+07	27.6	63.1	11.7	1.41	0.569
A0A1L1QZU5	Myosin-binding protein C, cardiac OS=Danio rerio OX=7955 GN=mybpc3 PE=1 SV=1	49	1.83406e+08	1.66174e+08	1.26954e+08	1.19266e+08	1.10116e+08	4.7153e+07	2.57667e+08	2.62745e+08	2.65093e+08	242643936	4.03304e+08	4.3395e+08	3.26113e+08	1.98127e+08	2.06372e+08	1.68033e+08	2.65323e+08	2.39881e+08	2.55068e+08	2.52205e+08	14.3	10.6	4.14	-2.03	0.0036
A0A1W6S8R0	Myosin XVIIIb OS=Danio rerio OX=7955 GN=myo18b PE=2 SV=1	3	0	0	0	754422	0	0	0	0	0	409525	884776	719591	1.77072e+06	2.31999e+06	1.72289e+06	1.73532e+06	360318	694466	1.07907e+06	869173	50.2	17.7	40.5	1.71	0.145
A0A286Y8V3	Si:dkey-164f24.2 OS=Danio rerio OX=7955 GN=si:dkey-164f24.2 PE=1 SV=1	2	1.01541e+06	0	0	0	299007	0	3376490	2147981	2.29744e+06	4587977	2.32303e+06	402395	790317	1.07789e+06	1.5297e+06	848624	3.49203e+06	2.3927e+06	2.08307e+06	4.59333e+06	86.7	30.1	36.4	-1.02	0.724
A0A286Y9E2	Family with sequence similarity 120C OS=Danio rerio OX=7955 GN=fam120c PE=1 SV=1	8	2401598	0	1.53176e+06	1.108e+07	3.64198e+06	3.01304e+06	1.51188e+07	1.62815e+07	2.77804e+07	2.53391e+07	8.56254e+06	8.13706e+06	6.12959e+06	2.07284e+07	1.11999e+07	1.34806e+07	2.15341e+07	2.13197e+07	2.56852e+07	2.51175e+07	17.1	32.9	9.86	1.99	0.0469
A0A286YA82	Eukaryotic translation initiation factor 4 gamma, 3b OS=Danio rerio OX=7955 GN=eif4g3b PE=1 SV=1	1	0	0	0	0	0	0	0	0	0	628733	252232	590699	1.03533e+06	336887	539576	460757	186432	196504	245489	610914	62.7	22.9	65.3	-1.4	0.677
A0A286YAF6	Apolipoprotein Bb, tandem duplicate 1 OS=Danio rerio OX=7955 GN=apobb.1 PE=1 SV=1	3	9163507	1.12327e+07	7.47667e+06	16810347	1.06338e+07	5.1406e+06	1.25555e+07	1.50206e+07	1.3209e+07	1.65116e+07	1.98779e+07	2.8119e+07	1.83034e+07	2.54847e+07	2.03774e+07	1.81799e+07	1.24403e+07	1.44463e+07	1.19765e+07	1.60437e+07	23.9	17.6	13.7	-1.04	0.879
A0A286YBE8	Serine--tRNA ligase, cytoplasmic OS=Danio rerio OX=7955 GN=sars PE=1 SV=1	1	0	0	0	2.92468e+06	1.17265e+06	0	0	1.12102e+06	0	0	146879	503525	129362	4.43385e+06	2.1992e+06	8.53511e+06	454491	998559	188118	480238	81.2	63.6	63.9	19.5	0.00681
A0A286YBE9	Plectin a OS=Danio rerio OX=7955 GN=pleca PE=1 SV=1	2	0	0	0	8665971	0	0	578280	412261	1.81176e+06	430622	1.69882e+06	1.26752e+06	1.53896e+06	1.3504e+06	1.20413e+06	1.16405e+06	1.14921e+06	955979	1.64271e+06	641436	14.5	7.91	38.2	-1.21	0.15
A1L1U3	GTPase-activating protein (SH3 domain)-binding protein 2 OS=Danio rerio OX=7955 GN=g3bp2 PE=1 SV=1	1	0	0	0	0	0	0	0	0	0	0	449154	421018	771107	530611	597158	371664	192039	226848	232982	365424	35.6	23.2	30	-1.09	0.782
A1L1W2	Zgc:158452 OS=Danio rerio OX=7955 GN=tp53bp1 PE=2 SV=1	3	2.92954e+06	5240583	997546	5528779	4451208	736708	0	0	1.45187e+06	5.10927e+06	7.02344e+06	1.73852e+07	6.36058e+06	8.8246e+06	1.14901e+07	2.69955e+06	1.54572e+06	1.31412e+06	1.62009e+06	1.13674e+06	60.3	58.8	15.7	-1.34	0.564
A2BEN1	ATPase H+-transporting V1 subunit Aa OS=Danio rerio OX=7955 GN=atp6v1aa PE=1 SV=1	2	0	0	0	8202291	0	0	273989	0	1414152	0	704377	1.2317e+06	877340	1.33462e+06	1.29869e+06	1.07088e+06	525692	906274	1.57745e+06	644692	28.7	11.6	51.5	1.32	0.201
A2BEV6	Novel protein (Zgc:103442) OS=Danio rerio OX=7955 GN=nexn PE=4 SV=2	8	2.46532e+07	1.42213e+08	1.37024e+07	3.5495e+07	2.1087e+07	16222014	2.70084e+07	3.666e+07	3.91196e+07	4.25466e+07	5.4116e+07	3.52684e+08	3.54402e+07	5.75859e+07	4.36243e+07	5.39748e+07	2.72251e+07	3.31376e+07	3.57159e+07	4.14783e+07	121	14	17.2	-2.85	0.528
A2BHA3	Creatine kinase, muscle a OS=Danio rerio OX=7955 GN=ckma PE=1 SV=1	4	0	1955692	0	2008233	795013	2.59491e+06	1.54166e+06	1.64755e+06	1.19111e+06	0	907945	6.44541e+06	2.0378e+06	4.72527e+06	3.77244e+06	9.17292e+06	2.14502e+06	1.76737e+06	1.86035e+06	2.67321e+06	93.5	48.9	19.3	1.88	0.264
A2BIB9	Ankyrin 2b, neuronal OS=Danio rerio OX=7955 GN=ank2b PE=4 SV=1	2	353496	750501	0	0	0	176449	1.12882e+06	484429	1.96427e+06	297303	884723	2.85211e+06	1.42709e+06	810469	918841	962075	1.41671e+06	1.77122e+06	1.78099e+06	982510	59	8.71	25.3	-1.92	0.252
A2BIN5	Methylcrotonoyl-CoA carboxylase 2 (beta) OS=Danio rerio OX=7955 GN=mccc2 PE=1 SV=1	24	3.81783e+08	1.30222e+08	1.04156e+08	3.87602e+08	6.02758e+07	1.22925e+07	2.51145e+08	281025027	2.69291e+08	2.34983e+08	7.5867e+08	3.28924e+08	2.92984e+08	5.0953e+08	1.1608e+08	1.27968e+08	2.49571e+08	2.51007e+08	2.45246e+08	2.29895e+08	56.3	89.1	3.96	-1.83	0.263
A2CE51	Eukaryotic translation elongation factor 2,-like 2 OS=Danio rerio OX=7955 GN=eef2l2 PE=1 SV=1	1	0	0	0	1.38909e+06	0	0	0	763998	1077755	0	901132	1.0357e+06	680983	2.10588e+06	393986	829926	750638	680538	977193	827989	20.5	80.2	15.7	1.27	0.962
A2CG95	Acyl-CoA dehydrogenase medium chain OS=Danio rerio OX=7955 GN=acadm PE=1 SV=1	2	2.24382e+06	1.91506e+06	2.14225e+06	0	616997	0	1.90998e+06	3.27862e+06	2.37678e+06	2.0787e+06	4.77188e+06	4.69914e+06	5.16629e+06	1.08875e+06	1.8527e+06	1.05798e+06	1.89247e+06	2.92046e+06	2.15501e+06	3.52537e+06	5.15	33.8	28.3	-3.66	0.0162
A2RUY4	Zgc:158395 protein OS=Danio rerio OX=7955 GN=wasla PE=2 SV=1	2	0	122591	0	0	0	0	3.25029e+06	3.62256e+06	3.89428e+06	2.26275e+06	618520	580724	1.64013e+06	1.26307e+06	962395	1.17164e+06	3.22048e+06	3.22683e+06	3.53091e+06	2.19863e+06	63.5	13.6	19.1	1.2	0.476
A2RUY5	Ubiquitin-associated protein 2b OS=Danio rerio OX=7955 GN=ubap2b PE=1 SV=1	6	0	5.31139e+06	0	2.25548e+06	0	381464	3.33892e+06	3.22843e+06	3.89116e+06	3808341	3.02171e+06	1.4292e+07	2.05294e+06	5.68742e+06	3.33199e+06	3.85514e+06	3.77242e+06	4.03415e+06	4.94615e+06	4.66885e+06	105	28.8	12.5	-1.5	0.925
A3KQS1	Papillary renal cell carcinoma (translocation-associated) OS=Danio rerio OX=7955 GN=prcc PE=1 SV=1	1	0	880488	0	0	0	0	356394	0	553798	429741	1.0695e+06	2.16053e+06	832171	784772	350657	907702	353126	544741	502125	417562	52.3	43	18.9	-1.99	0.173
A4FUM8	ATPase H+-transporting V1 subunit B2 OS=Danio rerio OX=7955 GN=atp6v1b2 PE=1 SV=1	1	0	0	0	3285117	0	455235	0	0	0	957482	553006	215539	618627	4.98029e+06	1.93456e+06	1.40065e+06	382058	494712	193856	930345	46.8	69.7	62.5	5.99	0.0273
A4FUP1	Histidine ammonia-lyase OS=Danio rerio OX=7955 GN=hal PE=1 SV=1	2	2297362	437357	426646	8.54042e+06	1.52347e+06	0	2.79877e+06	1.44049e+06	1.70911e+06	3.15307e+06	5.14364e+06	1.98161e+06	1.34336e+06	7.32694e+06	3.27896e+06	1.73064e+07	2.77311e+06	3.56354e+06	3.86433e+06	3.0637e+06	72.1	77.6	14.8	3.3	0.145
A4QNV1	ATP-dependent 6-phosphofructokinase OS=Danio rerio OX=7955 GN=pfkmb PE=2 SV=1	2	1.87217e+06	1.38593e+06	1.00037e+06	0	0	678715	0	1577234	2149300	2188173	4.45195e+06	3.66169e+06	2.63921e+06	787417	1.80364e+06	2.55013e+06	1.05645e+06	1.5982e+06	2.25388e+06	2.56281e+06	25.4	51.6	36.1	-2.09	0.127
A4QNV2	Jph2 protein OS=Danio rerio OX=7955 GN=jph2 PE=2 SV=1	2	441754	813452	0	1.60669e+06	686296	660520	2.11282e+06	4.99287e+06	3.45261e+06	2.73481e+06	2.07443e+06	2.21991e+06	2.22657e+06	2.81887e+06	2.22439e+06	3.38234e+06	2.09344e+06	4.44744e+06	3.13046e+06	2.6573e+06	3.96	20.6	32.6	1.29	0.18
A4QP71	Nap1l4a protein OS=Danio rerio OX=7955 GN=nap1l4a PE=2 SV=1	5	6599194	1.18983e+07	7.63959e+06	11272293	6.22618e+06	5.71825e+06	7.7093e+06	9.33074e+06	7.02728e+06	1.09469e+07	1.54853e+07	2.96024e+07	1.95663e+07	1.90602e+07	1.39357e+07	1.95361e+07	8.79715e+06	8.75872e+06	7.16623e+06	1.08641e+07	33.7	17.7	17	-1.23	0.462
A4VAK4	Heat shock protein 1 OS=Danio rerio OX=7955 GN=hspb1 PE=1 SV=1	12	120139391	1.11364e+08	9.88459e+07	1.77344e+08	1.57565e+08	1.01553e+08	2.09157e+08	2.35553e+08	2.32727e+08	2.15091e+08	2.56199e+08	2.76006e+08	2.39384e+08	2.68857e+08	2.95955e+08	3.18505e+08	2.07367e+08	2.1036e+08	2.12143e+08	2.09337e+08	7.13	8.44	0.951	1.14	0.106
A5PF53	Rho GTPase-activating protein 35b OS=Danio rerio OX=7955 GN=arhgap35b PE=4 SV=1	2	1.34732e+06	2.76489e+06	0	334927	0	640136	0	1.10872e+06	1.54068e+06	0	2.86532e+06	6.78446e+06	6.67784e+06	1.19212e+06	1.80079e+06	1.96955e+06	766776	987604	1.75304e+06	1.68427e+06	41	24.7	38.1	-3.29	0.0371
A5PL78	LOC572200 protein (Fragment) OS=Danio rerio OX=7955 GN=LOC572200 PE=2 SV=1	8	2.52915e+06	0	1.05069e+06	6.29359e+07	3.86329e+06	0	2.55254e+07	2.73651e+07	2.2726e+07	1.94954e+07	8.32556e+06	6.01319e+06	5.31146e+06	9.84186e+07	1.22273e+07	5.57433e+07	2.61287e+07	2.50585e+07	2.27103e+07	2.29779e+07	24.1	77.7	6.81	8.47	0.0915
A5PL98	Succinate dehydrogenase [ubiquinone] iron-sulfur subunit, mitochondrial OS=Danio rerio OX=7955 GN=sdhb PE=2 SV=1	3	3.97055e+06	1.38197e+06	827731	948970	1.6611e+06	978871	3.53041e+06	4.68845e+06	5.35671e+06	4.33937e+06	8.4441e+06	3.94018e+06	3.01719e+06	2.36604e+06	3.98045e+06	3.94245e+06	4.65943e+06	4.17628e+06	4.85689e+06	4.21639e+06	56.6	26.9	7.47	-1.5	0.414
A5PMG2	Si:ch211-199o1.2 OS=Danio rerio OX=7955 GN=si:ch211-199o1.2 PE=1 SV=1	5	6.74239e+06	3.53382e+06	3430851	3.21518e+07	8.15629e+06	5.51207e+06	4.06809e+06	6.17652e+06	6.31099e+06	4.5399e+06	1.56244e+07	9.83646e+06	1.15355e+07	5.10073e+07	1.52964e+07	2.55467e+07	4.91939e+06	5.66022e+06	6.38631e+06	4.93487e+06	24.1	60.1	12.8	2.48	0.134
A5PMV7	Protein phosphatase 2, regulatory subunit A, beta a OS=Danio rerio OX=7955 GN=ppp2r1ba PE=1 SV=1	1	0	0	0	0	0	0	0	0	0	1.28613e+06	488690	115963	181899	746944	896257	832168	194786	105328	369712	1.24968e+06	75.9	9.08	109	3.15	0.0865
A5WV25	Membrane protein, palmitoylated 1 OS=Danio rerio OX=7955 GN=mpp1 PE=3 SV=1	8	3.6006e+06	2.83822e+06	6.9891e+06	0	1.01873e+07	4.56733e+06	8.60943e+06	8.39092e+06	2.16065e+06	4.49742e+06	9.56896e+06	1.00991e+07	1.93722e+07	1.3898e+07	2.21763e+07	1.75687e+07	8.96075e+06	9.44387e+06	7.85528e+06	7.44869e+06	42.4	23.2	11.1	1.37	0.265
A5X6X5	Titin a OS=Danio rerio OX=7955 GN=ttn.2 PE=4 SV=1	151	8.11683e+07	6.34629e+07	1.21852e+08	9.94738e+07	4.85168e+07	1.69106e+07	3.78925e+08	4.27105e+08	4.34156e+08	439122780	2.3002e+08	2.70036e+08	3.31842e+08	2.21779e+08	1.55862e+08	1.3991e+08	4.10849e+08	4.13291e+08	4.24865e+08	4.18486e+08	18.5	25.2	1.49	-1.61	0.0547
A5X6X6	Titin b OS=Danio rerio OX=7955 GN=ttn.1 PE=4 SV=1	63	8.10003e+06	8.16595e+06	1.87287e+07	7.07715e+07	3.1419e+07	9.2871e+06	7.56059e+07	9.41849e+07	8.05867e+07	1.02014e+08	4.28199e+07	4.40817e+07	5.83095e+07	1.29194e+08	9.60997e+07	5.45483e+07	9.50159e+07	9.81378e+07	9.79872e+07	1.07933e+08	17.8	40.1	5.64	1.93	0.126
A7E2H1	Zgc:152732 protein (Fragment) OS=Danio rerio OX=7955 GN=myh7l PE=2 SV=1	2	1.27721e+07	2972342	0	0	5.26506e+06	2.50726e+06	7.64395e+06	6.10443e+06	8.81856e+06	7036865	7.3107e+06	7.54202e+06	8.67924e+06	2.69464e+07	1.07919e+07	8.50708e+06	7.57385e+06	7.85963e+06	7.99573e+06	8.61142e+06	9.34	65.2	5.46	1.97	0.258
A7E2L4	Guanine nucleotide binding protein (G protein), beta polypeptide 2-like 1 OS=Danio rerio OX=7955 GN=rack1 PE=2 SV=1	2	0	742459	0	22618319	1691806	574810	1426917	4.39156e+06	2.61868e+06	2.3788e+06	1.25307e+06	2.26765e+06	437796	2.40858e+07	3.90839e+06	2.70083e+06	1.92874e+06	3.91182e+06	2.94299e+06	2.79344e+06	69.5	117	28.1	7.75	0.107
A7MBS2	Tubulin alpha chain OS=Danio rerio OX=7955 GN=tuba1c PE=2 SV=1	15	3.61168e+07	3.14256e+07	2.36676e+07	4.45701e+08	9.66378e+07	4.61043e+07	9.43684e+07	9.76874e+07	1.02239e+08	8.77578e+07	7.85865e+07	8.23891e+07	6.52635e+07	6.76787e+08	2.06512e+08	1.42881e+08	9.92195e+07	9.71824e+07	9.3182e+07	8.87911e+07	11.9	85.3	4.87	4.54	0.108
A7MCD6	Zgc:110343 protein OS=Danio rerio OX=7955 GN=prdx1 PE=2 SV=1	3	4763558	0	5138366	2.21195e+07	3.66836e+06	1150258	3.57691e+06	6.77164e+06	4.49049e+06	3.32457e+06	1.03328e+07	1.42293e+07	1.29067e+07	8.42705e+06	7.50204e+06	8.5063e+06	5.81153e+06	6.47042e+06	4.19738e+06	6.32052e+06	15.9	6.85	18.3	-1.53	0.0322
A7MCL7	Cystatin 14a, tandem duplicate 2 OS=Danio rerio OX=7955 GN=cst14a.2 PE=1 SV=1	2	4.52168e+06	2.04605e+06	1.8398e+06	9.59054e+06	2.18557e+06	1.81867e+06	2899187	4084559	5.30595e+06	3.97838e+06	1.0684e+07	5.5698e+06	5.2007e+06	8.81741e+06	4.57726e+06	6.4358e+06	3.19703e+06	3.96623e+06	4.81087e+06	4.32683e+06	42.9	32.2	16.7	-1.08	0.854
A7MCL8	Etfb protein OS=Danio rerio OX=7955 GN=etfb PE=2 SV=1	6	4.39115e+06	5.76121e+06	4.19e+06	2.5214e+06	5.05815e+06	2.67833e+06	7.0699e+06	8.54333e+06	9.47544e+06	9.71432e+06	1.1849e+07	1.62032e+07	1.13615e+07	1.06482e+07	1.0526e+07	1.0172e+07	8.99529e+06	8.64578e+06	9.00043e+06	1.01621e+07	20.3	2.37	7.19	-1.26	0.192
A7MCP4	Ras homolog gene family, member Ab OS=Danio rerio OX=7955 GN=rhoab PE=2 SV=1	18	3.57845e+06	8.96472e+06	3.81656e+06	1.18325e+08	1.00089e+08	9.39894e+07	1.11791e+08	1.296e+08	1.24199e+08	1.09309e+08	1.6727e+07	1.52472e+07	1.8587e+07	1.83426e+08	1.89571e+08	2.8359e+08	1.15483e+08	1.17084e+08	1.16199e+08	1.06764e+08	9.93	25.7	4.21	13	0.000908
A7MCR1	Cytochrome b-c1 complex subunit Rieske, mitochondrial OS=Danio rerio OX=7955 GN=uqcrfs1 PE=1 SV=1	3	3.0376e+07	17970564	2.46049e+07	3.54612e+07	1.65816e+07	1.09198e+07	1.46147e+07	2.39425e+07	19146925	1.89087e+07	6.46002e+07	5.49558e+07	5.93374e+07	5.37596e+07	3.10974e+07	3.94169e+07	1.44807e+07	2.1327e+07	1.84529e+07	1.96868e+07	8.1	27.7	15.8	-1.44	0.125
A7YT47	Hadha protein OS=Danio rerio OX=7955 GN=hadhaa PE=1 SV=1	2	0	0	0	0	0	0	0	661471	0	0	266470	1.23507e+06	336430	1.11067e+06	1.56259e+06	1.54169e+06	691662	824329	439033	613294	88.2	18.2	25.1	2.29	0.15
A7YYB3	Ubiquinol-cytochrome c reductase core protein II OS=Danio rerio OX=7955 GN=uqcrc2b PE=2 SV=1	11	2.40469e+07	1.24368e+07	1.29155e+07	1.5503e+07	1.30138e+07	1.18408e+07	2.2421e+07	1.54939e+07	1.83723e+07	20045746	5.27264e+07	5.09965e+07	3.21131e+07	2.64471e+07	2.28375e+07	4.67841e+07	2.43442e+07	2.44197e+07	2.64565e+07	2.04295e+07	25.3	40.3	10.5	-1.41	0.248
A7YYE3	40S ribosomal protein S6 OS=Danio rerio OX=7955 GN=rps6 PE=2 SV=1	3	0	2.57521e+06	0	1.09415e+07	1.77983e+06	831516	4.10146e+06	3.69436e+06	3.69532e+06	4.7051e+06	1.83468e+06	6.4565e+06	880100	1.65874e+07	3.93643e+06	4.31661e+06	4.06384e+06	3.49847e+06	3.9605e+06	4.71218e+06	97.6	86.9	12.3	2.71	0.217
A7YYE6	Zgc:92772 protein OS=Danio rerio OX=7955 GN=rab11bb PE=2 SV=1	1	0	0	0	7556892	0	0	488658	559026	671069	0	964311	175229	135884	326481	362068	660441	484177	497957	608454	425213	110	40.8	15.2	1.06	0.585
A8B6H7	Nuclear receptor co-repressor OS=Danio rerio OX=7955 GN=ncor1 PE=2 SV=1	9	11606098	2.31355e+07	8617096	1.3425e+07	1.18547e+07	7.27545e+06	18947221	2.02925e+07	1.72423e+07	1.80699e+07	2.86088e+07	6.16299e+07	2.43049e+07	2.37609e+07	2.68309e+07	2.70175e+07	2.06782e+07	2.12597e+07	1.69708e+07	2.04768e+07	53.5	7.07	9.8	-1.48	0.401
A8DZH1	FXYD domain-containing ion transport regulator OS=Danio rerio OX=7955 GN=fxyd1 PE=1 SV=1	1	610894	0	0	0	0	0	0	0	0	0	1.29918e+06	229760	181503	324861	425133	657256	178647	388477	351979	279578	111	36.3	30.9	-1.22	0.813
A8DZJ0	Tubulin folding cofactor B OS=Danio rerio OX=7955 GN=tbcb PE=1 SV=1	1	0	0	0	0	0	139881	0	0	0	0	524623	1.01928e+06	974020	512373	698536	430383	280678	181840	530589	564549	32.6	25.1	48.2	-1.53	0.2
A8E586	Troponin T2, cardiac OS=Danio rerio OX=7955 GN=tnnt2a PE=2 SV=1	12	3.05549e+07	3.35125e+07	23438296	53740212	4.5282e+07	1.9027e+07	1.33491e+08	1.59799e+08	1.46955e+08	6.80339e+07	6.78845e+07	8.66111e+07	6.96166e+07	8.73289e+07	8.54907e+07	6.42126e+07	1.33668e+08	1.44633e+08	1.27975e+08	6.71009e+07	13.9	16.3	29.5	1.06	0.698
A8E590	Eif4a1b protein OS=Danio rerio OX=7955 GN=eif4a1b PE=2 SV=1	2	2.12923e+06	1.80065e+06	6.94273e+06	13830306	3173463	987004	2.51559e+06	2.79868e+06	3.80202e+06	3.68724e+06	4.85506e+06	4.75571e+06	1.6884e+07	2.09669e+07	6.35767e+06	3.70324e+06	3.10541e+06	3.19955e+06	3.44727e+06	3.58274e+06	79	89.9	6.6	1.17	0.911
A8E5G8	Proteasome subunit beta type OS=Danio rerio OX=7955 GN=psmb5 PE=2 SV=1	1	0	0	0	3.21828e+06	0	0	640269	0	0	0	831039	191605	179193	4.87896e+06	820569	443973	634398	105881	263110	155885	93.1	120	82.4	5.11	0.199
A8E7G6	Peroxiredoxin 3 OS=Danio rerio OX=7955 GN=prdx3 PE=1 SV=1	2	0	0	0	0	0	0	0	0	0	0	844527	1.77195e+06	1.95814e+06	1.23121e+06	1.42273e+06	965474	656309	310502	692793	505929	39.1	19	32.1	-1.26	0.575
A8KB60	Tubulin alpha chain (Fragment) OS=Danio rerio OX=7955 GN=si:ch211-114n24.6 PE=2 SV=1	1	2.78211e+06	2.59632e+06	1605035	7.71597e+06	6.96596e+06	4963940	3.38487e+06	5409770	5168558	4.15517e+06	5.91667e+06	6.37081e+06	3.87072e+06	1.16975e+07	1.30641e+07	1.52729e+07	3.35383e+06	4.8188e+06	4.6863e+06	4.03741e+06	24.7	13.5	15.9	2.48	0.0137
A8KC20	Pyruvate kinase OS=Danio rerio OX=7955 GN=pklr PE=2 SV=1	1	1.91047e+06	1253825	0	81860888	4.78723e+06	1.09312e+06	7557168	9115411	7.91383e+06	8478514	4.06297e+06	3.07662e+06	1.50564e+06	1.24102e+08	8.97804e+06	3.36329e+06	7.48787e+06	8.11963e+06	7.17542e+06	8.23822e+06	44.8	150	6.55	15.8	0.239
A8WFS0	LOC560210 protein OS=Danio rerio OX=7955 GN=hsp70l PE=2 SV=1	1	2.07672e+06	0	1.40924e+06	0	1.7242e+06	1.1447e+06	0	1.11489e+06	0	975419	4.41652e+06	3.25189e+06	3.39855e+06	3.28802e+06	3.23359e+06	3.52197e+06	784686	993095	2.20502e+06	947774	17.2	4.58	53.1	-1.1	0.456
A8WGC6	ATP synthase subunit beta OS=Danio rerio OX=7955 GN=atp5f1b PE=1 SV=1	6	9.04619e+06	3.52065e+06	5.61356e+06	4.74349e+07	4.26767e+06	909742	8.52654e+06	1.40812e+07	1.81896e+07	1.55256e+07	2.07956e+07	1.08256e+07	1.21223e+07	6.33611e+07	9.37725e+06	2.66891e+07	1.68409e+07	1.34279e+07	1.6789e+07	1.53061e+07	37.2	83.2	10.3	2.27	0.404
A8WGK7	Elongation factor 1-alpha OS=Danio rerio OX=7955 GN=eef1a1b PE=2 SV=1	1	0	0	0	11745866	0	0	918331	759775	1.00703e+06	0	247817	389388	224443	464957	723928	343705	909909	676776	913064	380274	31.1	38	35	1.78	0.116
A8WGM1	VAMP (vesicle-associated membrane protein)-associated protein A,-like OS=Danio rerio OX=7955 GN=vapal PE=1 SV=1	8	4.20197e+07	3.88206e+07	2.23728e+07	5.20048e+07	3.44709e+07	1.52117e+07	2.22586e+07	2.75653e+07	2.28343e+07	2.17171e+07	8.93626e+07	9.53996e+07	5.44525e+07	8.01216e+07	6.53057e+07	6.17578e+07	2.34996e+07	2.57203e+07	2.20003e+07	2.21788e+07	27.7	14.1	7.35	-1.15	0.581
A8WIP5	Host cell factor C1b OS=Danio rerio OX=7955 GN=hcfc1b PE=1 SV=1	26	1.30997e+07	2.23367e+07	1.40482e+07	1.1418e+07	7.96429e+06	9.90947e+06	161177240	1.67531e+08	173777943	1.69272e+08	3.51429e+07	6.69416e+07	4.47849e+07	3.10212e+07	4.411e+07	4.48456e+07	1.69324e+08	1.63518e+08	1.71787e+08	1.68989e+08	33.3	19.4	2.07	-1.22	0.472
A9C3S0	Si:ch211-198n5.11 OS=Danio rerio OX=7955 GN=si:ch211-198n5.11 PE=1 SV=1	2	1.06281e+06	0	0	1094668	0	0	673890	853599	706864	984738	2.53191e+06	528021	892655	2.12391e+06	1.21024e+06	1.46999e+06	875418	1.06619e+06	1.24468e+06	1.25217e+06	81	29.4	16.1	1.22	0.5
A9C3T0	Protein kinase, cAMP-dependent, regulatory, type II, alpha A OS=Danio rerio OX=7955 GN=prkar2aa PE=1 SV=1	9	3.434e+06	4.97186e+06	2.69177e+06	0	753606	3.7014e+06	9.18698e+06	1.282e+07	2.10718e+07	9.74834e+06	1.08332e+07	1.45291e+07	9.56366e+06	4.99257e+06	7.24993e+06	1.48973e+07	1.20516e+07	1.28599e+07	1.37581e+07	1.01288e+07	22.2	57.4	12.7	-1.29	0.404
A9JR97	LOC792623 protein (Fragment) OS=Danio rerio OX=7955 GN=dusp27 PE=2 SV=1	5	467997	0	1.44777e+06	1.29186e+06	0	0	1.67623e+06	0	1.82306e+06	1.38038e+06	3.20115e+06	3.93596e+06	5.96107e+06	4.49276e+06	2.78264e+06	2.76165e+06	2.18837e+06	2.16398e+06	2.36164e+06	2.24443e+06	32.7	29.7	3.93	-1.3	0.348
A9JRU8	C14orf159 protein (Fragment) OS=Danio rerio OX=7955 GN=dglucy PE=2 SV=1	2	0	3.26667e+06	671338	0	0	0	0	0	0	0	3.27833e+06	8.01571e+06	2.12875e+06	1.07252e+06	1.03782e+06	1.82546e+06	427743	410167	679866	600251	69.7	33.9	24.9	-3.41	0.0877
A9JRZ5	Si:ch211-239h19.1 protein (Fragment) OS=Danio rerio OX=7955 GN=plekha5 PE=2 SV=1	2	0	0	0	0	0	0	1.76275e+06	0	0	1.30388e+06	1.4162e+06	1.54108e+06	1.04518e+06	1.38439e+06	1.50059e+06	842832	1.87186e+06	2.06373e+06	2.30165e+06	1.57507e+06	19.3	28.3	15.7	-1.07	0.707
A9JT52	Acadvl protein OS=Danio rerio OX=7955 GN=acadvl PE=2 SV=1	2	777158	0	0	2.01382e+06	0	0	0	1.73301e+06	923644	962470	1.80483e+06	1.13043e+06	1.03884e+06	3.78893e+06	871609	1.46006e+06	1.08093e+06	1.67158e+06	1.09036e+06	1.17376e+06	31.6	75.6	22.4	1.54	0.601
B0R0F7	Cardiac myosin light chain-1 OS=Danio rerio OX=7955 GN=cmlc1 PE=1 SV=1	9	2.39492e+07	1.84762e+07	1.18155e+07	4.37438e+07	1.79327e+07	1.56258e+07	5.61252e+07	6.48378e+07	6.2047e+07	6.38128e+07	5.16761e+07	4.78314e+07	3.22132e+07	6.7859e+07	3.76234e+07	4.8853e+07	5.60394e+07	5.82359e+07	5.64325e+07	6.20043e+07	23.5	29.7	4.68	1.17	0.543
B0R0T3	MAGI family member, X-linked b (Fragment) OS=Danio rerio OX=7955 GN=magixb PE=4 SV=1	2	0	0	6.16572e+06	0	0	0	0	0	0	0	1.28218e+06	1.73307e+06	770955	853979	851546	1.12237e+06	441321	617579	336952	635015	38.1	16.5	28.3	-1.34	0.412
B0R0Z7	Novel protein similar to vertebrate phosphatidylinositol binding clathrin assembly protein (PICALM) (Fragment) OS=Danio rerio OX=7955 GN=picalmb PE=4 SV=1	1	0	0	0	1.32201e+06	0	0	0	1.24457e+06	1447256	1.29981e+06	1.00711e+06	171866	1.00352e+06	2.00419e+06	370701	566385	1.62739e+06	1.10861e+06	1.31222e+06	1.26298e+06	66.1	91	16.4	1.35	0.724
B0S758	Titin, tandem duplicate 2 (Fragment) OS=Danio rerio OX=7955 GN=ttn.2 PE=4 SV=1	1	0	0	0	0	0	0	1.68141e+06	885598	1.51423e+06	1.55885e+06	459820	457722	281267	309087	443780	500629	1.66599e+06	788854	1.37294e+06	1.51467e+06	25.6	23.5	28.7	1.05	0.832
B0UXL2	Isocitrate dehydrogenase [NADP] OS=Danio rerio OX=7955 GN=idh1 PE=1 SV=1	1	141842800	529711072	135745838	963458613	364274176	176309782	485743096	494765144	496480296	526747296	3.01655e+08	1.2998e+09	3.27367e+08	1.46062e+09	6.83165e+08	5.42465e+08	4.81289e+08	4.40716e+08	4.50155e+08	5.11819e+08	88.5	55.2	6.85	1.39	0.448
B0V0X1	Propionyl CoA carboxylase, beta polypeptide OS=Danio rerio OX=7955 GN=pccb PE=1 SV=1	37	1.3883e+09	827707236	8.70007e+08	1.10923e+09	4.49034e+08	2.05284e+08	1.08631e+09	1.22528e+09	1.13961e+09	1.05649e+09	2.95262e+09	2.09313e+09	2.10505e+09	1.68594e+09	8.45933e+08	6.51443e+08	1.07668e+09	1.09815e+09	1.03874e+09	1.02951e+09	20.7	51.8	3.04	-2.25	0.0745
B0V0Y4	Paralemmin 1b OS=Danio rerio OX=7955 GN=palm1b PE=4 SV=1	4	734464	533518	0	1931698	0	0	66295.8	4218570	9.12945e+06	4.66324e+06	3.11787e+06	2.67138e+06	4.33051e+06	4.38825e+06	2.39203e+06	2.54615e+06	5.43472e+06	4.88846e+06	8.46019e+06	5.24386e+06	25.5	35.7	27.5	-1.09	0.7
B0V234	Four and a half LIM domains 2b OS=Danio rerio OX=7955 GN=fhl2b PE=4 SV=1	1	0	0	0	864006	0	0	1.02107e+06	658252	1.41301e+06	717930	117628	731532	532731	1.30985e+06	408820	459614	1.01171e+06	586344	1.28117e+06	697583	68	69.7	35.2	1.58	0.46
B0V2S9	Catenin (cadherin-associated protein), delta 2b OS=Danio rerio OX=7955 GN=ctnnd2b PE=1 SV=1	12	0	1.73315e+06	0	4.28335e+06	5.37732e+06	213874	2.71824e+06	1.36276e+06	4.30355e+06	5.41721e+06	5.02502e+06	8.8443e+06	6.81144e+06	1.29772e+07	1.71095e+07	2.19016e+07	5.18479e+06	4.44836e+06	6.22828e+06	7.14632e+06	27.7	25.8	20.6	2.51	0.0143
B1H1H2	Zgc:158415 protein OS=Danio rerio OX=7955 GN=bin3 PE=2 SV=1	1	0	0	0	2568763	1.22825e+06	92366.4	147618	0	86684.9	0	132550	431781	340957	3.89428e+06	2.30348e+06	284190	146264	125718	78596.6	91077.5	50.8	83.7	28.2	7.16	0.168
B2GP50	Gfap protein OS=Danio rerio OX=7955 GN=gfap PE=2 SV=1	1	0	0	0	132888392	0	0	8553163	9552476	11154126	9264564	163891	759806	245141	776314	610172	454853	8.47473e+06	8.50895e+06	1.01134e+07	9.00199e+06	82.9	26.2	8.47	1.58	0.29
B2GTW6	Citrate synthase OS=Danio rerio OX=7955 GN=cs PE=1 SV=1	1	774992	788500	0	3358040	0	0	0	0	1.22843e+06	714654	1.64816e+06	1.93481e+06	1.63011e+06	5.09084e+06	535014	661777	885099	1.52144e+06	1.11381e+06	694400	9.84	124	33.8	1.21	0.672
B3DGY6	Spectrin beta chain OS=Danio rerio OX=7955 GN=sptb PE=2 SV=1	10	519923	594209	1.32927e+06	0	1.10497e+06	743821	8.76607e+06	3.25792e+06	3.62464e+06	5.23091e+06	5.69446e+06	4.70764e+06	6.4716e+06	5.99023e+06	6.62442e+06	6.73153e+06	9.51938e+06	6.78966e+06	7.01069e+06	7.318e+06	15.7	6.21	16.4	1.15	0.256
B3DGZ9	Pyruvate carboxylase OS=Danio rerio OX=7955 GN=pcxb PE=2 SV=1	1	1.07048e+06	0	737861	0	0	0	0	0	1.05922e+06	685657	2.27658e+06	2.1741e+06	1.77944e+06	810586	453585	675219	342255	602023	960385	666225	12.6	27.9	39.5	-3.21	0.0102
B3DH54	Zgc:152810 protein OS=Danio rerio OX=7955 GN=ncl PE=2 SV=1	5	5.56509e+06	5.21791e+06	1.7529e+06	8554149	8.31069e+06	1.29548e+06	9.47697e+06	1.61138e+07	2.23107e+07	8.84896e+06	1.32343e+07	1.36979e+07	6.623e+06	1.49427e+07	1.84882e+07	6.02423e+06	9.71941e+06	1.53317e+07	1.36443e+07	1.52669e+07	35.4	48.8	19.5	1.18	0.809
B3DHB6	Integrin beta OS=Danio rerio OX=7955 GN=itgb1b PE=2 SV=1	2	2.35493e+06	4579328	1.70278e+06	8.36587e+06	2.9698e+06	2.72413e+06	3244515	3641283	3.38587e+06	3.48486e+06	5.21286e+06	1.16637e+07	4.77581e+06	1.3047e+07	6.19239e+06	9.05159e+06	3.41018e+06	3.75269e+06	3.32087e+06	3.74402e+06	53.4	36.5	6.3	1.31	0.44
B3DHH0	Zgc:194249 protein OS=Danio rerio OX=7955 GN=cast PE=2 SV=1	47	4.71084e+08	5.33051e+08	3.68758e+08	9.89302e+08	6.96368e+08	4.66736e+08	5.99573e+08	6.93282e+08	6.62799e+08	6.18207e+08	1.00966e+09	1.33072e+09	1.02701e+09	1.50231e+09	1.28852e+09	1.45659e+09	6.18427e+08	6.26199e+08	6.17007e+08	6.02254e+08	16.1	7.95	1.62	1.26	0.0986
B3DI32	Vcl protein OS=Danio rerio OX=7955 GN=vcla PE=1 SV=1	8	3.12497e+06	8.3552e+06	3.56875e+06	1.78891e+07	8.79231e+06	6.20298e+06	4.61843e+07	3.83494e+07	3.17941e+07	3.32859e+07	9.97354e+06	2.34404e+07	1.08787e+07	2.44248e+07	2.29969e+07	2.26505e+07	4.87772e+07	3.51537e+07	3.54181e+07	3.3346e+07	51	4.03	18.7	1.58	0.186
B3DIT9	Si:rp71-57j15.4 OS=Danio rerio OX=7955 GN=pdk4 PE=2 SV=1	3	2.24644e+06	2.41621e+06	1.45964e+06	4.62977e+06	1.65558e+06	0	4.1589e+06	2.27838e+06	6184130	2.26979e+06	4.9813e+06	7.46038e+06	3.73565e+06	7.65231e+06	4.25568e+06	4.29595e+06	5.01404e+06	2.90637e+06	5.60711e+06	3.60607e+06	35.2	36.1	29	1	0.993
B3DJM6	Myosin, heavy polypeptide 1, skeletal muscle OS=Danio rerio OX=7955 GN=myhz1.1 PE=2 SV=1	19	7.4756e+06	1.89939e+07	1.23183e+07	37803740	2.39628e+07	1.85254e+07	2.09517e+07	1.45997e+07	24202964	2.43953e+07	2.58398e+07	5.34608e+07	3.67722e+07	6.64451e+07	5.36445e+07	7.11169e+07	2.4913e+07	2.26274e+07	2.57832e+07	2.8991e+07	36	14.2	10.3	1.65	0.111
B3DKC5	Lamin A OS=Danio rerio OX=7955 GN=lmna PE=1 SV=1	2	205187	303367	0	1.82665e+07	250112	0	1.58538e+06	1.63026e+06	1.6713e+06	1.05811e+06	570355	857133	873157	9.29716e+06	1.11445e+06	3.99166e+06	1.57084e+06	1.45217e+06	1.51536e+06	2.56593e+06	22.2	86.5	29.8	6.26	0.126
B3DKQ5	Reticulon OS=Danio rerio OX=7955 GN=rtn1a PE=2 SV=1	2	0	0	0	6.09339e+06	3.31877e+06	4.14557e+06	0	1094946	0	0	321702	1.11531e+06	573436	9.23767e+06	6.22406e+06	1.2755e+07	636650	1.19673e+06	582174	487115	60.5	34.8	44.1	14	0.00585
B7ZUY8	Si:dkey-25f3.3 OS=Danio rerio OX=7955 GN=synm PE=2 SV=1	7	5.15835e+06	1.08932e+06	10751071	3.84898e+06	0	2.26394e+06	5.39681e+06	4.67976e+06	3.49458e+06	4.6457e+06	1.33416e+07	5.21734e+06	2.79285e+07	8.22213e+06	8.93836e+06	1.06106e+07	7.82546e+06	6.3157e+06	6.36569e+06	6.9e+06	74.3	13.2	10.2	-1.67	0.596
B7ZV91	LOC792190 protein OS=Danio rerio OX=7955 GN=mccc1 PE=2 SV=1	118	3.76727e+10	2.79773e+10	3.38965e+10	2.41527e+10	2.4785e+10	1.49046e+10	3.64845e+10	3.98161e+10	4.01419e+10	3.67051e+10	8.01497e+10	6.94802e+10	8.17519e+10	3.6649e+10	4.64841e+10	4.58809e+10	3.61923e+10	3.54827e+10	3.64232e+10	3.56883e+10	8.65	12.8	1.21	-1.79	0.00502
B7ZVL5	Cherp protein OS=Danio rerio OX=7955 GN=cherp PE=2 SV=1	1	0	0	0	0	0	0	0	0	0	0	607091	227152	1.10082e+06	862030	632873	827930	256551	289151	416993	112567	67.9	16	46.5	1.2	0.515
B8A4X3	Fibulin 5 OS=Danio rerio OX=7955 GN=fbln5 PE=1 SV=1	1	611316	0	0	0	0	0	1020294	1.06655e+06	1.00526e+06	725420	1.30007e+06	978775	385443	412348	872744	559526	1.01094e+06	950034	911462	704861	52.2	38.2	14.8	-1.44	0.533
B8A5D4	Thioredoxin-like 1 OS=Danio rerio OX=7955 GN=txnl1 PE=1 SV=1	3	1.83242e+06	0	1.08845e+06	5.88766e+06	2.4206e+06	255434	3.40183e+06	5.03645e+06	4.75446e+06	5.25569e+06	4.49281e+06	2.64148e+06	2.97242e+06	9.26565e+06	5.3725e+06	7.01879e+06	4.44786e+06	5.29756e+06	6.02982e+06	5.10674e+06	29.3	27.1	12.5	2.14	0.0274
B8A5F6	Novel protein similar to vertebrate sorbin and SH3 domain containing 2 (SORBS2) OS=Danio rerio OX=7955 GN=sorbs2b PE=4 SV=1	6	0	0	0	0	0	0	3.79282e+07	4.18788e+07	4.15986e+07	4.24166e+07	2.80828e+06	2.06123e+06	3.43746e+06	3.42716e+06	2.87078e+06	4.35361e+06	3.80564e+07	3.73039e+07	3.80712e+07	4.14822e+07	24.9	21.1	4.83	1.28	0.256
B8A5F7	Novel protein similar to vertebrate sorbin and SH3 domain containing 2 (SORBS2) (Fragment) OS=Danio rerio OX=7955 GN=DKEY-276L17.3-004 PE=4 SV=1	1	0	772362	1.09314e+06	0	0	339947	1.24816e+06	0	0	0	1.72484e+06	1.89521e+06	2.63623e+06	398529	529797	1.04594e+06	1.23671e+06	167486	129315	125339	23.2	52	132	-3.17	0.0345
B8A5L6	Fibrinogen alpha chain OS=Danio rerio OX=7955 GN=fga PE=1 SV=1	5	1.94401e+06	0	286776	499459	2.25604e+06	917673	516548	8.89996e+06	8.37838e+06	7.94894e+06	6.09646e+06	3.02188e+06	2.65122e+06	2.80025e+06	8.05179e+06	5.0175e+06	7.98743e+06	8.23332e+06	8.79838e+06	7.82638e+06	48.2	49.8	5.18	1.35	0.524
B8JHU4	Actinin, alpha 1 OS=Danio rerio OX=7955 GN=actn1 PE=1 SV=1	3	0	1.78537e+06	1.85935e+06	45662010	1.73404e+06	0	4.5989e+06	3.36254e+06	2.36196e+06	984042	2.57829e+06	4.49324e+06	5.40735e+06	1.3119e+07	4.52633e+06	5.5398e+06	4.74847e+06	3.33417e+06	2.26737e+06	2.06351e+06	34.7	60.8	39.6	1.86	0.243
B8JIS1	ATP synthase, H+ transporting, mitochondrial Fo complex, subunit B1 OS=Danio rerio OX=7955 GN=atp5pb PE=1 SV=1	3	2.81171e+06	0	9.17654e+06	0	0	231720	3191434	0	0	3.13929e+06	6.76714e+06	4.66486e+06	5.93591e+06	1.6097e+06	1.69753e+06	2.036e+06	3.50271e+06	4.09083e+06	4.70695e+06	3.71411e+06	18.3	12.6	13.2	-3.25	0.00164
B8JIS5	Glutathione S-transferase mu tandem duplicate 3 OS=Danio rerio OX=7955 GN=gstm.3 PE=1 SV=1	3	5.15015e+06	1.87466e+06	3.67101e+06	3.77525e+06	2.83626e+06	3.74821e+06	6335865	4.26673e+06	7.01112e+06	5.63454e+06	1.09527e+07	8.5678e+06	8.85305e+06	6.27484e+06	5.78127e+06	1.15324e+07	6.27776e+06	6.07575e+06	6.35693e+06	5.47485e+06	13.8	40.5	6.6	-1.2	0.408
B8JIS8	Glutathione S-transferase mu, tandem duplicate 1 OS=Danio rerio OX=7955 GN=gstm.1 PE=1 SV=1	1	1.32224e+06	0	0	0	0	0	0	1132397	0	827745	2.81199e+06	126408	170589	344096	530515	461078	836249	1.00869e+06	1.24406e+06	804285	148	21.2	20.7	-2.33	0.922
B8JL29	High mobility group box 2a OS=Danio rerio OX=7955 GN=hmgb2a PE=1 SV=1	2	0	0	0	0	0	0	1.75162e+06	0	2.50398e+06	0	447293	1.15473e+06	453213	637525	1.245e+06	1.0206e+06	1.73555e+06	1.84015e+06	2.3965e+06	1.86229e+06	59.4	31.7	15.2	1.41	0.338
B8JLS3	Myosin, heavy chain 6, cardiac muscle, alpha OS=Danio rerio OX=7955 GN=myh6 PE=1 SV=1	8	1.41662e+06	4.02652e+06	3.55766e+06	4.35292e+06	2.57716e+06	2.98934e+06	5395304	2.57495e+06	9.99948e+06	9.26882e+06	1.37853e+07	1.2859e+07	1.06329e+07	9.3253e+06	1.24273e+07	1.37699e+07	7.43868e+06	8.39733e+06	1.00833e+07	1.11026e+07	13	19.3	17.8	-1.05	0.715
B8JMI2	Dishevelled segment polarity protein 3a OS=Danio rerio OX=7955 GN=dvl3a PE=1 SV=1	7	1.41185e+07	9.46097e+06	9.82093e+06	1.81439e+07	1.82223e+07	1.54212e+07	1.78659e+07	25794714	2.50096e+07	2.25675e+07	3.01496e+07	2.69703e+07	2.44416e+07	3.12324e+07	3.53088e+07	4.74475e+07	2.01447e+07	2.63377e+07	2.4533e+07	2.80135e+07	10.5	22.2	13.7	1.4	0.104
D1GJ55	Actn2 OS=Danio rerio OX=7955 GN=actn2b PE=2 SV=1	3	722798	0	1.24368e+06	1.49057e+06	433383	0	2.05264e+06	3.49536e+06	933664	3.23236e+06	2.71122e+06	1.7053e+06	3.57538e+06	3.3882e+06	1.8858e+06	3.42073e+06	3.07948e+06	3.11352e+06	2.50332e+06	3.14075e+06	35.1	30.3	10.3	1.09	0.766
D1MCG5	Tubulin alpha chain OS=Danio rerio OX=7955 GN=si:ch73-199e17.1 PE=2 SV=1	1	0	0	0	3122347	2.15453e+06	1.9182e+06	2.62433e+06	0	0	1.35873e+06	1.07868e+06	235063	437103	4.73352e+06	4.04064e+06	5.90186e+06	2.60026e+06	2.89066e+06	1.34513e+06	1.32022e+06	75.5	19.2	40.4	8.38	0.0288
E3W9A6	Sema domain, transmembrane domain (TM), and cytoplasmic domain, (semaphorin) 6E OS=Danio rerio OX=7955 GN=sema6e PE=2 SV=1	3	0	0	0	1.83374e+06	0	0	0	685723	303711	1.35092e+06	1.20619e+06	2.25355e+06	865650	3.91571e+06	2.34537e+06	2.22153e+06	850233	1.4434e+06	812152	2.3117e+06	50.2	33.4	51.7	1.96	0.109
E7EXC4	Serpin peptidase inhibitor, clade B (ovalbumin), member 14 OS=Danio rerio OX=7955 GN=serpinb14 PE=1 SV=2	4	2001361	715201	2.67081e+06	3.22986e+06	1.16181e+06	1.27128e+06	2.06274e+06	1.47411e+06	2.58567e+06	1.43888e+06	6.08347e+06	2.7898e+06	6.95916e+06	6.51888e+06	4.31387e+06	4.36082e+06	2.59946e+06	2.07193e+06	2.45207e+06	2.28342e+06	41.7	24.9	9.65	-1.04	0.971
E7EXC7	Ubiquitin-specific peptidase 9 OS=Danio rerio OX=7955 GN=usp9 PE=1 SV=1	5	0	523260	0	837817	0	378045	0	2.7203e+06	2.52167e+06	2.68158e+06	3.09509e+06	3.85812e+06	4.00399e+06	3.39986e+06	3.11245e+06	4.14671e+06	2.61347e+06	2.70768e+06	2.99664e+06	2.7722e+06	13.4	15	5.88	-1.03	0.819
E7EXG2	Drebrin-like b OS=Danio rerio OX=7955 GN=dbnlb PE=1 SV=1	8	1.51157e+07	1.32e+07	4.59267e+06	1.34215e+08	2.14325e+07	1.04605e+07	2.9406e+07	3.82449e+07	3.14084e+07	3.74103e+07	3.52189e+07	1.33064e+07	1.40409e+07	2.06008e+08	4.34897e+07	3.30933e+07	3.25451e+07	3.44685e+07	3.29202e+07	3.65878e+07	59.7	103	5.38	4.52	0.143
E7EXI3	Plakophilin 4 OS=Danio rerio OX=7955 GN=pkp4 PE=4 SV=1	27	2.61046e+06	8.29695e+06	6.8867e+06	2.5464e+06	687812	892639	7.21319e+07	6.85276e+07	6.05521e+07	5.38429e+07	2.20598e+07	2.96437e+07	2.76202e+07	1.80473e+07	1.80959e+07	1.6931e+07	7.44103e+07	6.50058e+07	5.79791e+07	6.25009e+07	14.9	3.72	10.7	-1.49	0.0408
E7EXT3	Alpha-1,4 glucan phosphorylase OS=Danio rerio OX=7955 GN=pygmb PE=1 SV=1	18	6.32667e+07	4.83722e+07	4.82816e+07	19342438	3.79279e+07	2.45086e+07	8.29376e+07	99389892	9.25134e+07	85269245	1.25826e+08	1.30607e+08	1.16069e+08	5.80721e+07	7.70583e+07	8.21865e+07	9.78797e+07	9.03344e+07	9.34373e+07	8.867e+07	5.97	17.5	4.37	-1.71	0.0265
E7EY90	Musculoskeletal, embryonic nuclear protein 1b OS=Danio rerio OX=7955 GN=mustn1b PE=4 SV=1	5	1.2884e+07	9.06609e+06	1.20425e+07	2.82794e+07	2.46186e+07	1.85324e+07	3.64089e+07	4.22648e+07	4.95463e+07	5.13534e+07	2.92546e+07	2.22462e+07	2.90419e+07	4.33939e+07	4.61701e+07	5.7469e+07	3.6075e+07	3.98753e+07	4.49233e+07	4.9898e+07	14.8	15.2	14.1	1.83	0.00836
E7EYG1	Obscurin, cytoskeletal calmodulin and titin-interacting RhoGEF b OS=Danio rerio OX=7955 GN=obscnb PE=1 SV=2	6	5790687	13602490	30439438	4500814	0	694999	6.64294e+06	8.60512e+06	6.35667e+06	7.01349e+06	1.39356e+07	3.52663e+07	7.59794e+07	8.90113e+06	5.56859e+06	4.8887e+06	9.86243e+06	8.82578e+06	7.30223e+06	7.14488e+06	75.5	33.3	15.7	-6.47	0.0616
E7EYJ7	Erbb2 interacting protein OS=Danio rerio OX=7955 GN=erbin PE=1 SV=2	5	0	0	2.44505e+06	614079	0	0	421435	3.47709e+06	1.99932e+06	3.3777e+06	2.18878e+06	2.04306e+06	7.07337e+06	2.75818e+06	2.40621e+06	2.49118e+06	3.81147e+06	3.98264e+06	5.57113e+06	3.53555e+06	76	7.2	21.7	-1.48	0.646
E7EYQ0	SERPINE1 mRNA-binding protein 1b OS=Danio rerio OX=7955 GN=serbp1b PE=1 SV=2	1	0	0	0	482168	0	0	0	0	0	0	493725	276577	299230	730973	380107	869141	212061	238451	189592	131541	33.5	38.2	23.6	1.85	0.136
E7F0A1	Profilin OS=Danio rerio OX=7955 GN=pfn1 PE=1 SV=1	2	4.96346e+06	0	986700	7644113	2.74752e+06	1.64989e+06	1.43965e+06	1.30418e+06	1.39283e+06	0	1.05557e+07	5.38469e+06	3.02691e+06	1.15886e+07	5.15274e+06	1.14613e+07	1.65037e+06	1.30631e+06	1.43278e+06	2.44182e+06	60.9	39.1	29.8	1.49	0.368
E7F0G8	Rho GTPase-activating protein 32b OS=Danio rerio OX=7955 GN=arhgap32b PE=1 SV=1	3	0	0	0	0	0	0	1.02578e+06	565413	597995	1.78747e+06	1.36645e+06	1.27546e+06	754283	1.28525e+06	1.46402e+06	2.04052e+06	1.50472e+06	1.91778e+06	1.30727e+06	2.12249e+06	29.2	24.7	21.8	1.41	0.206
E7F0K3	Caveolae-associated protein 1a OS=Danio rerio OX=7955 GN=cavin1a PE=4 SV=1	1	0	0	0	0	0	0	0	0	0	0	765444	1.09642e+06	1.12671e+06	331204	562006	801146	436173	228327	500064	530822	20.1	41.6	32.1	-1.76	0.123
E7F0N6	Amyloid beta (A4) precursor protein-binding, family B, member 1 (Fe65) OS=Danio rerio OX=7955 GN=apbb1 PE=4 SV=1	3	0	553549	2.00472e+06	2.38425e+06	520856	252401	1.47907e+06	932796	1.39335e+06	528672	1.43002e+06	1.7825e+06	5.00996e+06	3.94871e+06	1.78903e+06	1.96806e+06	1.90173e+06	1.29164e+06	1.7748e+06	818571	72	46.7	34.2	-1.07	0.954
E7F112	RNA-binding motif, single stranded-interacting protein 2a OS=Danio rerio OX=7955 GN=rbms2a PE=4 SV=1	1	0	0	0	784689	0	0	0	0	0	526617	300243	211568	866702	1.1896e+06	958373	354004	361267	154655	609013	511692	77.3	51.7	48.4	1.81	0.306
E7F1F3	Proline-rich basic protein 1 OS=Danio rerio OX=7955 GN=prob1 PE=4 SV=1	3	237479	0	0	0	0	138012	0	278190	295012	269234	1.28928e+06	815677	2.5505e+06	1.60563e+06	1.90026e+06	1.23242e+06	1.01196e+06	709296	919966	752497	57.8	21.2	16.7	1.02	0.775
E7F2L1	AP2-associated kinase 1b OS=Danio rerio OX=7955 GN=aak1b PE=1 SV=1	1	0	0	0	0	0	0	0	1.52148e+06	0	857133	207076	1.05563e+06	314888	572378	676572	705399	1.37279e+06	1.35527e+06	1.14517e+06	832841	87.8	10.7	21.4	1.24	0.447
E7F2W2	Tight junction protein 1a OS=Danio rerio OX=7955 GN=tjp1a PE=1 SV=3	44	9.6477e+06	2.15756e+07	7658434	3.03086e+07	1.17024e+07	9.16898e+06	1.7415e+08	1.79823e+08	1.68734e+08	1.879e+08	4.34106e+07	5.46466e+07	3.84184e+07	5.0943e+07	4.69497e+07	5.08151e+07	1.81697e+08	1.75912e+08	1.60173e+08	1.87492e+08	18.3	4.58	6.67	1.09	0.454
E7F2X0	CAP-GLY domain-containing linker protein 1a OS=Danio rerio OX=7955 GN=clip1a PE=1 SV=2	2	0	0	0	2.03935e+06	830615	0	0	0	0	0	480685	401084	481960	3.77367e+06	2.53223e+06	6.06486e+06	426624	848369	826557	422457	10.2	43.5	37.8	9.07	0.0103
E7F354	3-monooxygenase/tryptophan 5-monooxygenase activation protein, gamma polypeptide 2 OS=Danio rerio OX=7955 GN=ywhag2 PE=1 SV=1	1	0	0	0	9.14841e+06	0	0	0	0	0	700733	438366	1.00567e+06	217685	398935	722744	490017	209359	156204	165015	680873	73.4	31.1	83.6	-1.03	0.806
E7F372	RAS p21 protein activator (GTPase-activating protein) 1b OS=Danio rerio OX=7955 GN=rasa1b PE=4 SV=1	8	0	1.60427e+06	0	3.96355e+06	1.63692e+06	0	3.33396e+06	7.07026e+06	4.23532e+06	6.51929e+06	3.14203e+06	6.83297e+06	5.52404e+06	9.14811e+06	7.09019e+06	7.21264e+06	5.88341e+06	7.26334e+06	6.0757e+06	7.85511e+06	36.2	14.8	14	1.51	0.178
E7F429	Si:dkeyp-121d4.3 OS=Danio rerio OX=7955 GN=si:dkeyp-121d4.3 PE=1 SV=1	6	1976804	0	0	1.28237e+06	17548604	0	5.20797e+06	5.27324e+06	6.45819e+06	2.87115e+06	6.84466e+06	4.26863e+06	3.48827e+06	4.69526e+06	3.55027e+07	1.15997e+07	5.81448e+06	5.10343e+06	6.24402e+06	4.58187e+06	36.1	93.6	13.6	3.55	0.23
E7F475	Eukaryotic translation initiation factor 3 subunit C OS=Danio rerio OX=7955 GN=eif3c PE=1 SV=1	3	0	0	0	0	0	0	1380708	1.46861e+06	1.37941e+06	1.37186e+06	1.39445e+06	1.35068e+06	2.04298e+06	1.54444e+06	1.59111e+06	2.05926e+06	1.95496e+06	1.75438e+06	1.68846e+06	1.82481e+06	24.3	16.4	6.32	1.08	0.605
E7F4G7	Ankyrin 2a, neuronal OS=Danio rerio OX=7955 GN=ank2a PE=1 SV=2	9	0	0	0	2.50671e+06	739629	0	1.67154e+07	1.38704e+07	1.31508e+07	1.94319e+07	4.12367e+06	3.51924e+06	5.3089e+06	8.94501e+06	6.47065e+06	4.81859e+06	1.76361e+07	1.31384e+07	1.24006e+07	2.05278e+07	21.1	30.8	24.1	1.56	0.127
E7F4I8	Diphosphoinositol pentakisphosphate kinase 1b OS=Danio rerio OX=7955 GN=ppip5k1b PE=3 SV=2	3	534274	583584	580429	1.2477e+06	1.03703e+06	899009	3.1051e+06	3327847	3.62923e+06	2.30401e+06	1.99265e+06	1.92757e+06	1.58713e+06	2.58554e+06	3.06753e+06	3.82224e+06	3.07663e+06	2.96431e+06	3.2906e+06	2.72298e+06	11.9	19.7	7.84	1.72	0.0225
E7F4J7	Protein kinase, DNA-activated, catalytic polypeptide OS=Danio rerio OX=7955 GN=prkdc PE=1 SV=1	2	457749730	670668374	382223496	4.41005e+08	235474728	1.66567e+08	1.31625e+08	271597487	386796628	404437619	9.73489e+08	1.64568e+09	9.21775e+08	6.6857e+08	4.41613e+08	5.12489e+08	1.30417e+08	2.41928e+08	3.50706e+08	3.92975e+08	34.2	21.5	42.2	-2.18	0.0333
E7F4R0	Myeloid/lymphoid or mixed-lineage leukemia; translocated to, 4a OS=Danio rerio OX=7955 GN=afdna PE=1 SV=2	84	37196282	5.85672e+07	1.57966e+07	9.41426e+07	5.14048e+07	3.88055e+07	5.31881e+08	6.12391e+08	6.2811e+08	5.85337e+08	1.05183e+08	1.628e+08	9.11956e+07	1.56998e+08	1.2631e+08	1.44608e+08	5.48268e+08	5.60459e+08	5.96268e+08	5.84355e+08	31.7	10.8	3.82	1.19	0.368
E7F6M7	Glycerol-3-phosphate acyltransferase 1, mitochondrial OS=Danio rerio OX=7955 GN=gpam PE=3 SV=1	9	2571989	871642	1.3169e+06	3620784	1.8003e+06	919883	7082822	5747728	9.69695e+06	1.03624e+07	9.9097e+06	1.06552e+07	7.01147e+06	9.80701e+06	8.63012e+06	7.26486e+06	8.96272e+06	8.12714e+06	1.01984e+07	1.14164e+07	20.9	14.8	14.9	-1.07	0.714
E7F737	Dishevelled segment polarity protein 3b OS=Danio rerio OX=7955 GN=dvl3b PE=4 SV=1	2	1.14482e+06	727888	979082	2.31927e+06	2.34683e+06	1.54943e+06	2.65265e+06	3.32234e+06	2.61367e+06	4.30591e+06	2.56197e+06	2.69182e+06	3.35173e+06	3.51604e+06	4.40127e+06	4.76725e+06	2.62832e+06	2.95941e+06	2.3698e+06	4.18387e+06	14.8	15.2	26.4	1.47	0.0351
E7F7T3	Uncharacterized protein OS=Danio rerio OX=7955 PE=4 SV=2	1	0	0	0	0	0	0	2.30639e+06	1678885	2219044	2.7115e+06	196256	342506	729833	495122	810790	439572	2.28524e+06	1.49548e+06	2.01199e+06	2.63465e+06	65.2	34.4	22.8	1.38	0.391
E7F7U1	Paxillin b OS=Danio rerio OX=7955 GN=pxnb PE=1 SV=2	2	0	0	0	2.1982e+06	559415	550420	4067143	3.76582e+06	5403028	5131452	643667	823185	1.64263e+06	4.58457e+06	1.67946e+06	2.27769e+06	4.24194e+06	3.48149e+06	5.01346e+06	5.25593e+06	51.4	53.9	17.9	2.75	0.0707
E7F851	Family with sequence similarity 120A OS=Danio rerio OX=7955 GN=fam120a PE=4 SV=2	1	0	0	0	0	0	0	0	0	0	0	131736	679048	533751	634025	845921	557225	603052	476169	399085	126779	63.3	22	50.2	1.52	0.354
E7F8B7	Pleckstrin homology domain-containing, family A member 7b OS=Danio rerio OX=7955 GN=plekha7b PE=4 SV=2	97	3.31824e+08	5.78309e+08	3.142e+08	5.70571e+08	4.70903e+08	3.06778e+08	2.06252e+09	2.23781e+09	2.00406e+09	1.82476e+09	7.32241e+08	1.46033e+09	7.9989e+08	9.25648e+08	9.10469e+08	8.72549e+08	2.04896e+09	2.001e+09	1.82752e+09	1.79871e+09	40.3	3.03	6.48	-1.1	0.838
E7F8Y3	Sorbin and SH3 domain-containing 3 OS=Danio rerio OX=7955 GN=sorbs3 PE=4 SV=2	5	4.13731e+06	1.37866e+06	8184833	2.66439e+06	1.04361e+07	765099	6.71277e+06	6504638	4.16198e+06	7.6501e+06	9.97195e+06	1.05649e+07	2.1465e+07	1.10744e+07	2.15712e+07	1.30572e+07	7.99271e+06	7.11155e+06	4.4737e+06	8.36276e+06	46.2	36.6	25.1	1.09	0.753
E7F9K1	LIM domains-containing 1a OS=Danio rerio OX=7955 GN=limd1a PE=1 SV=1	8	420043	1.28483e+06	322319	1.04643e+06	1.25368e+06	131775	2.50799e+07	2.47756e+07	3.33749e+07	3.90558e+07	5.25555e+06	5.00805e+06	4.16788e+06	5.09729e+06	6.25031e+06	5.21393e+06	2.48499e+07	2.43424e+07	3.19619e+07	3.93859e+07	11.9	11.5	23.5	1.15	0.222
E7F9V7	Pleckstrin homology domain-containing, family A member 6 OS=Danio rerio OX=7955 GN=plekha6 PE=1 SV=2	2	647482	2.05297e+06	1245698	3079610	2.15317e+06	2103193	4.17867e+06	5.22758e+06	5.83651e+06	5.14182e+06	1.88269e+06	5.31126e+06	3.46845e+06	5.20944e+06	4.55501e+06	7.00663e+06	4.14035e+06	4.65651e+06	5.29192e+06	4.9961e+06	48.3	22.7	10.4	1.57	0.218
E7F9Z1	von Willebrand factor OS=Danio rerio OX=7955 GN=vwf PE=4 SV=2	1	0	0	428079	1.00652e+06	0	0	0	0	0	817634	864125	368701	1.03236e+06	1.5259e+06	417273	377150	314910	369051	177812	794461	45.7	84.3	64.3	1.02	0.859
E7FAE9	Si:ch211-285f17.1 OS=Danio rerio OX=7955 GN=si:ch211-285f17.1 PE=1 SV=2	9	1.47206e+06	689045	1.51527e+06	0	518086	0	6.97897e+06	8.41973e+06	1.71021e+06	6.31744e+06	6.77466e+06	1.03244e+07	7.63855e+06	4.1124e+06	6.40614e+06	4.99067e+06	9.29469e+06	1.03839e+07	8.50358e+06	7.86132e+06	22.4	22.4	12.1	-1.6	0.0597
E7FAJ8	Dishevelled segment polarity protein 1a OS=Danio rerio OX=7955 GN=dvl1a PE=4 SV=2	7	2.85249e+07	2.74356e+07	1.36874e+07	7.26695e+07	5.81022e+07	1.70448e+07	5.69958e+07	6.55495e+07	7.20832e+07	7.73524e+07	6.76292e+07	6.81468e+07	3.48943e+07	1.12104e+08	1.10756e+08	5.43523e+07	5.67067e+07	5.83888e+07	6.53573e+07	7.51602e+07	33.5	35.7	13.1	1.62	0.217
E7FAR1	Junctional cadherin 5-associated a OS=Danio rerio OX=7955 GN=jcada PE=4 SV=1	3	0	0	0	0	0	0	0	0	0	0	1.47899e+06	876670	903063	2.05746e+06	1.54408e+06	1.79655e+06	1.3419e+06	764381	753589	670976	31.3	14.3	35	1.66	0.0706
E7FBG4	Uncharacterized protein OS=Danio rerio OX=7955 PE=4 SV=2	2	0	0	0	0	0	0	0	0	0	0	1.41198e+06	898089	1.0992e+06	978329	1.32524e+06	1.29058e+06	805356	638322	247161	779086	22.8	15.9	41.7	1.05	0.729
E7FBZ0	TAF4A RNA polymerase II, TATA box-binding protein (TBP)-associated factor OS=Danio rerio OX=7955 GN=taf4a PE=4 SV=2	1	0	0	0	0	741941	0	0	0	539502	0	268422	600181	454458	463639	1.39145e+06	436905	373472	505560	489163	317887	37.7	71.1	21.5	1.73	0.379
E7FBZ3	Uncharacterized protein OS=Danio rerio OX=7955 GN=zgc:171719 PE=1 SV=2	1	0	1.31445e+06	979176	0	0	657849	894604	0	0	0	6.2472e+06	3.22538e+06	2.36139e+06	766629	586915	2.02405e+06	886400	163683	358418	274170	51.7	69.5	76.2	-3.5	0.0534
E7FCE4	Receptor tyrosine kinase-like orphan receptor 2 OS=Danio rerio OX=7955 GN=ror2 PE=1 SV=1	13	7.62016e+06	1.72019e+07	3.89016e+06	1.19998e+07	9.92341e+06	4035405	3.32908e+07	4.11373e+07	3.18893e+07	3.26741e+07	2.24805e+07	4.54527e+07	1.60473e+07	2.25063e+07	2.34825e+07	1.88432e+07	3.36436e+07	3.83471e+07	3.8313e+07	3.95616e+07	55.2	11.3	6.98	-1.3	0.645
E7FD00	Ubiquitin-specific peptidase 43b OS=Danio rerio OX=7955 GN=usp43b PE=3 SV=1	11	0	0	523910	0	0	343652	5.082e+06	4.62223e+06	4.57096e+06	5.6793e+06	6.33597e+06	2.57546e+06	6.80568e+06	7.11942e+06	7.24697e+06	7.039e+06	7.50065e+06	8.27496e+06	6.68817e+06	7.11843e+06	44.3	1.47	9.11	1.36	0.334
E7FD35	RNA-binding motif protein 6 (Fragment) OS=Danio rerio OX=7955 GN=rbm6 PE=1 SV=2	1	0	0	0	0	0	0	0	0	0	0	252785	1.04819e+06	889817	352156	891836	409707	351830	511141	108371	199647	57.7	53.8	60.4	-1.32	0.728
E7FD42	EH domain-binding protein 1 OS=Danio rerio OX=7955 GN=ehbp1 PE=4 SV=2	4	6.77221e+07	5.97483e+07	41811640	6.83538e+07	5.6981e+07	2.47049e+07	5.18176e+07	6.904e+07	6.39268e+07	6.2529e+07	1.4534e+08	1.4837e+08	1.017e+08	1.04999e+08	1.08466e+08	7.81514e+07	5.21152e+07	6.24396e+07	5.82042e+07	6.11921e+07	19.8	17.1	7.87	-1.36	0.137
E7FD96	Elongation factor 1-alpha OS=Danio rerio OX=7955 GN=eef1a1l2 PE=1 SV=1	3	3.08348e+06	9.50212e+06	3.73986e+06	35112858	1.69882e+07	5.45708e+06	1.29556e+07	1.44805e+07	1.2849e+07	1.09852e+07	1.08317e+07	2.33162e+07	9.15025e+06	5.37269e+07	3.26329e+07	1.72174e+07	1.28368e+07	1.28986e+07	1.16501e+07	1.06738e+07	53.6	53.1	8.84	2.39	0.123
E7FDI9	Histone-lysine N-methyltransferase OS=Danio rerio OX=7955 GN=setd3 PE=1 SV=1	1	0	0	0	0	0	155112	1.35686e+06	565583	1.05948e+06	1.24461e+06	388918	232446	529945	358044	818385	477245	1.34442e+06	503798	960627	1.20933e+06	38.8	43.3	36.8	1.44	0.355
E7FE29	Myosin XVIIIAb OS=Danio rerio OX=7955 GN=myo18ab PE=1 SV=2	57	1.94649e+07	3.25038e+07	3.05982e+07	1.23801e+08	3.55988e+07	9.70092e+06	8.95888e+07	1.13325e+08	9.54188e+07	9.08985e+07	1.08272e+08	1.05784e+08	1.10336e+08	1.90808e+08	1.00247e+08	1.33787e+08	1.13086e+08	1.1461e+08	9.75353e+07	1.07418e+08	2.11	32.3	7.15	1.31	0.334
E7FEU8	Proline dehydrogenase OS=Danio rerio OX=7955 GN=prodhb PE=1 SV=1	1	556252	0	0	0	1.00361e+06	294204	0	0	0	726299	1.18297e+06	464312	1.29109e+06	1.11336e+06	1.88218e+06	905199	311541	277391	433362	705715	45.9	39.6	45	1.33	0.458
E7FG99	Coiled-coil domain-containing 141 OS=Danio rerio OX=7955 GN=ccdc141 PE=4 SV=3	13	10450172	1.32e+07	9.08328e+06	14377731	13827885	14799266	1.9974e+07	2.9503e+07	2.38838e+07	2.18775e+07	2.94708e+07	3.66095e+07	2.92338e+07	2.7679e+07	3.25945e+07	5.34083e+07	2.43822e+07	2.74997e+07	2.72051e+07	2.42003e+07	13.2	36	6.87	1.19	0.559
E9QBC9	Calpastatin (Fragment) OS=Danio rerio OX=7955 GN=cast PE=1 SV=1	3	28580398	0	27771433	0	30750189	2.23572e+07	26035718	2.25311e+07	7.95803e+06	1.0888e+06	6.07814e+07	7.15071e+07	6.74006e+07	4.50634e+07	5.85174e+07	6.9795e+07	2.61598e+07	2.03879e+07	7.21549e+06	1.71376e+06	8.13	21.4	81.7	-1.15	0.349
E9QC46	Calpastatin OS=Danio rerio OX=7955 GN=cast PE=1 SV=1	2	9334394	6543569	13836207	14890796	14085726	7.61858e+06	17505062	13931244	9.84415e+06	10851879	2.01086e+07	1.61815e+07	3.4199e+07	2.31618e+07	2.68979e+07	2.39264e+07	1.74848e+07	1.25532e+07	9.24739e+06	1.07796e+07	40.3	8	28.6	1.05	0.707
E9QC55	Zinc finger FYVE domain-containing protein OS=Danio rerio OX=7955 GN=zfyve16 PE=1 SV=1	2	27150229	1.20824e+07	1.56487e+07	1.55609e+07	1.94124e+07	2.6616e+07	13441686	16974489	17204921	1.88256e+07	5.80829e+07	3.00743e+07	3.83194e+07	2.42397e+07	3.7366e+07	8.23723e+07	1.34853e+07	1.54375e+07	1.61263e+07	1.85253e+07	34.1	63.5	13.1	1.14	0.935
E9QD79	Clathrin heavy chain OS=Danio rerio OX=7955 GN=cltcb PE=1 SV=2	7	1.04393e+06	0	0	51377315	0	0	1.48944e+06	621322	914409	1.20156e+06	5.1309e+06	4.25279e+06	3.68022e+06	3.87047e+06	4.52594e+06	4.59192e+06	2.82153e+06	2.4952e+06	2.68771e+06	3.0885e+06	16.8	9.21	8.99	-1.01	0.996
E9QDE7	Nicotinamide nucleotide transhydrogenase 2 (Fragment) OS=Danio rerio OX=7955 GN=nnt2 PE=1 SV=1	7	9.07656e+06	1.18793e+07	1.08804e+07	3.92004e+06	4.07708e+06	2.69056e+06	1.60995e+07	1.8238e+07	1.6242e+07	1.52107e+07	2.63232e+07	2.93443e+07	2.70188e+07	8.80356e+06	1.00043e+07	1.01626e+07	1.59518e+07	1.63601e+07	1.49607e+07	1.68917e+07	5.74	7.7	5.09	-2.85	9.51e-05
E9QF35	Calpastatin (Fragment) OS=Danio rerio OX=7955 GN=cast PE=1 SV=1	1	2.44053e+07	2.96169e+07	2.10681e+07	4.30313e+07	28959663	2.06947e+07	30491861	2.80094e+07	3.18573e+07	2.88333e+07	5.19024e+07	7.26736e+07	5.08081e+07	6.52361e+07	5.43114e+07	6.36729e+07	3.02122e+07	2.49496e+07	2.88848e+07	2.80162e+07	21.1	9.67	7.98	1.04	0.703
E9QFJ1	ATP-dependent 6-phosphofructokinase OS=Danio rerio OX=7955 GN=pfkpb PE=1 SV=1	1	0	1.15848e+06	644808	0	0	0	1.07265e+06	1.09051e+06	1.02557e+06	0	1.69226e+06	2.84267e+06	1.55503e+06	426464	549323	544441	1.06282e+06	971377	929879	1.80307e+06	34.8	13.7	34.5	-4.01	0.00931
E9QGC4	WW and C2 domain-containing 1 OS=Danio rerio OX=7955 GN=wwc1 PE=4 SV=1	1	0	0	0	0	152367	0	0	0	95391.1	0	1.08793e+06	163696	170112	667350	285751	923456	239093	334386	86490.5	214164	112	51.3	46.7	1.32	0.47
E9QGE0	Calpastatin (Fragment) OS=Danio rerio OX=7955 GN=cast PE=1 SV=1	1	0	0	871238	0	2.29735e+06	1.2801e+06	0	756827	1583582	0	841052	683913	2.10109e+06	2.99693e+06	4.30848e+06	3.93858e+06	953296	674150	1.43582e+06	736250	64.3	18	36.4	3.1	0.0576
E9QHE3	RING finger protein 207 OS=Danio rerio OX=7955 GN=rnf207b PE=3 SV=1	5	0	0	0	1.85188e+06	824981	217583	2.53832e+06	3.09455e+06	1.78458e+06	4.34603e+06	1.6751e+06	1.72315e+06	1.89129e+06	5.69465e+06	4.40041e+06	2.79938e+06	3.43549e+06	3.923e+06	3.4432e+06	5.18509e+06	6.44	33.7	20.6	2.44	0.0507
E9QI17	Carnitine palmitoyltransferase 1Ab (liver) OS=Danio rerio OX=7955 GN=cpt1ab PE=3 SV=2	1	0	0	0	0	0	0	0	0	0	0	527751	626224	140556	373315	495675	403596	114463	269731	393788	514229	59.5	15	53	-1.02	0.771
E9QI46	Coronin OS=Danio rerio OX=7955 GN=coro1cb PE=1 SV=1	5	0	1.21257e+06	0	0	1.11225e+06	2.99607e+06	1.16819e+07	8.48347e+06	1.12333e+07	1.6981e+07	1.82351e+06	4.18007e+06	1.91783e+06	3.08199e+06	4.379e+06	3.79106e+06	1.77348e+07	1.40583e+07	1.63407e+07	1.64998e+07	50.5	17.3	9.48	1.42	0.256
E9QI62	Filamin A, alpha (actin-binding protein 280) OS=Danio rerio OX=7955 GN=flna PE=1 SV=1	4	4.23765e+06	1.92793e+06	3246684	4.50622e+07	4.07998e+06	1.34233e+06	8409856	7.92146e+06	7.52804e+06	6.72709e+06	9.15277e+06	7.13386e+06	9.39864e+06	5.90749e+07	8.55837e+06	7.62073e+06	8.46587e+06	7.39384e+06	7.36008e+06	6.84108e+06	14.5	117	9.08	2.93	0.454
F1Q4P0	Zmp:0000001081 OS=Danio rerio OX=7955 GN=zmp:0000001081 PE=4 SV=2	1	4.81276e+09	6.2049e+09	1.64168e+10	2.24592e+09	1.79683e+09	1.1826e+09	4.12734e+09	4.3875e+09	4332489111	3947887376	1.02352e+10	1.52255e+10	3.95909e+10	3.40485e+09	3.36981e+09	3.63859e+09	4.08949e+09	3.9082e+09	3.92824e+09	3.836e+09	72.4	4.21	2.71	-6.25	0.053
F1Q4X3	Si:dkey-222n6.2 (Fragment) OS=Danio rerio OX=7955 GN=si:dkey-222n6.2 PE=1 SV=2	1	0	0	483698	0	1853549	0	1.72165e+06	0	0	0	238514	703289	1.16649e+06	701829	3.47617e+06	847718	1.70586e+06	157668	321737	121390	66	93.2	131	2.38	0.318
F1Q5B8	Oxoglutarate (alpha-ketoglutarate) dehydrogenase a (lipoamide) OS=Danio rerio OX=7955 GN=ogdha PE=1 SV=2	3	650082	179684	0	1.35376e+06	605754	0	1.60652e+06	911160	2.67287e+06	2.03705e+06	2.60758e+06	871442	1.37013e+06	2.37175e+06	1.96664e+06	1.75705e+06	2.59632e+06	1.62271e+06	2.42347e+06	1.97932e+06	55.3	15.4	20.4	1.26	0.419
F1Q5C7	Si:ch211-220f12.1 OS=Danio rerio OX=7955 GN=si:ch211-220f12.1 PE=4 SV=1	2	0	0	0	0	0	0	0	684643	819922	387166	1.14437e+06	1.09992e+06	1.11007e+06	910725	1.36771e+06	1.19731e+06	807677	1.10958e+06	931131	718756	2.08	19.9	19	1.04	0.873
F1Q5Q3	SERPINE1 mRNA-binding protein 1a OS=Danio rerio OX=7955 GN=serbp1a PE=1 SV=1	3	1.60034e+06	935620	1.20706e+06	3.65458e+06	1.02799e+06	201097	4.2479e+06	3.02659e+06	3.38169e+06	3.16606e+06	3.76518e+06	5.24327e+06	3.8262e+06	6.17604e+06	2.42762e+06	2.08584e+06	4.20894e+06	3.11112e+06	3.20966e+06	3.18842e+06	19.5	63.7	15.2	-1.2	0.483
F1Q649	Tensin 1b OS=Danio rerio OX=7955 GN=tns1b PE=1 SV=2	20	382428	1.67836e+06	0	2.28311e+06	2.03892e+06	1.24926e+06	2.66711e+07	4.27917e+07	5.46873e+07	4.12339e+07	8.54143e+06	1.21048e+07	8.86696e+06	1.35474e+07	1.51459e+07	1.75353e+07	3.52894e+07	4.1226e+07	5.06527e+07	4.32446e+07	20	13	14.9	1.57	0.0329
F1Q6F0	Phosphorylase b kinase regulatory subunit OS=Danio rerio OX=7955 GN=phkb PE=1 SV=2	2	1.35752e+06	0	974876	0	0	443495	0	0	0	0	3.21023e+06	1.95075e+06	2.5357e+06	1.03635e+06	1.26751e+06	1.87096e+06	960367	965029	562723	872180	24.6	31	22.6	-1.84	0.0528
F1Q6K8	Supervillin a OS=Danio rerio OX=7955 GN=svila PE=4 SV=1	4	0	0	483547	0	0	0	727144	765868	947579	988870	1.51825e+06	2.30171e+06	3.39523e+06	2.23371e+06	2.51519e+06	3.21893e+06	1.65177e+06	1.3321e+06	1.28988e+06	1.42592e+06	39.2	19.1	11.3	1.1	0.624
F1Q750	Host cell factor C1a OS=Danio rerio OX=7955 GN=hcfc1a PE=1 SV=1	3	0	2.62269e+06	0	0	0	0	0	0	1.88851e+06	0	2.54237e+06	6.75084e+06	920114	1.39622e+06	1.32796e+06	1.98441e+06	1.28478e+06	981313	2.30739e+06	899213	88.4	23	47.3	-2.17	0.49
F1Q7N8	Calcium-transporting ATPase OS=Danio rerio OX=7955 GN=si:dkey-28b4.8 PE=1 SV=2	1	1.37054e+06	0	0	0	1.03295e+06	0	0	0	0	606068	2.91469e+06	555101	490092	355821	1.9372e+06	430750	412305	497667	190463	588891	105	98.3	40.4	-1.45	0.698
F1Q7P7	Pdgfa-associated protein 1b OS=Danio rerio OX=7955 GN=pdap1b PE=1 SV=1	2	0	0	0	0	0	0	471225	1.09825e+06	599397	1.22432e+06	600644	738598	600283	1.01217e+06	1.25024e+06	1.64304e+06	922259	978280	1.05948e+06	1.18963e+06	12.3	24.5	11.2	2.01	0.0233
F1Q7T3	Solute carrier family 16 (monocarboxylate transporter), member 3 OS=Danio rerio OX=7955 GN=slc16a3 PE=4 SV=1	4	131390	249484	111225	320739	0	0	5.37311e+06	4.91946e+06	5.77227e+06	6.85933e+06	1.5063e+06	1.35927e+06	741101	2.12758e+06	2.72217e+06	2.11967e+06	5.32384e+06	5.02445e+06	5.23368e+06	6.66493e+06	33.8	14.9	13.4	1.93	0.0734
F1Q8D1	LIM domain-binding 3a OS=Danio rerio OX=7955 GN=ldb3a PE=1 SV=1	13	1.48523e+07	3.8223e+06	1.60988e+07	13877465	1.59059e+07	6.82957e+06	1.31797e+08	1.436e+08	1.4944e+08	140132065	3.38234e+07	2.0945e+07	2.35661e+07	4.09843e+07	3.29789e+07	2.48807e+07	1.31604e+08	1.30876e+08	1.36936e+08	1.36981e+08	26.1	24.4	2.47	1.26	0.317
F1Q8D2	NSFL1 (p97) cofactor (p47) OS=Danio rerio OX=7955 GN=nsfl1c PE=1 SV=1	5	0	0	369675	1.24888e+06	2.7753e+06	2.43178e+06	8.45416e+06	6628554	7.60927e+06	8.48766e+06	3.62958e+06	1.86097e+06	3.34808e+06	5.65783e+06	1.18885e+07	8.34772e+06	8.37663e+06	7.03544e+06	9.08985e+06	8.24711e+06	32.3	36.2	10.4	2.93	0.0235
F1Q8X5	Fermitin family homolog 2 OS=Danio rerio OX=7955 GN=fermt2 PE=2 SV=1	2	2.01314e+06	617316	367904	1.49871e+06	1.1288e+06	0	1.33923e+06	1.14001e+06	1.18955e+06	1322688	4.94527e+06	1.90972e+06	1.15265e+06	2.98745e+06	2.58309e+06	4.16997e+06	1.60679e+06	1.13697e+06	1.21961e+06	1.42827e+06	75.2	25.4	15.7	1.22	0.493
F1Q9A0	Sorbin and SH3 domain-containing 2a (Fragment) OS=Danio rerio OX=7955 GN=sorbs2a PE=1 SV=1	64	1.86431e+07	2.62724e+07	1.90788e+07	1.29137e+07	2.08734e+07	2.91659e+07	1.05628e+09	1.12472e+09	1.0808e+09	9.6226e+08	6.71734e+07	5.49394e+07	7.29681e+07	7.32613e+07	6.17904e+07	8.20907e+07	1.05049e+09	1.00467e+09	9.93694e+08	9.47244e+08	14.2	14.1	4.24	1.11	0.414
F1Q9P7	Si:ch1073-221c23.2 (Fragment) OS=Danio rerio OX=7955 GN=si:ch1073-221c23.2 PE=1 SV=1	1	916269	0	962405	0	0	0	1.00962e+06	1.25538e+06	1.03558e+06	756694	1.94861e+06	2.22101e+06	2.32095e+06	476482	868564	359410	1.00036e+06	1.11824e+06	938952	735249	8.91	46.9	16.9	-3.81	0.0286
F1QA42	Ataxin 2-like OS=Danio rerio OX=7955 GN=atxn2l PE=1 SV=1	2	0	0	0	0	0	0	0	885074	259786	1.13961e+06	596201	620579	878349	664518	892682	1.26211e+06	594376	1.28608e+06	351822	1.30564e+06	22.4	32.1	54.9	1.35	0.289
F1QAJ7	Solute carrier family 25 (mitochondrial carrier; phosphate carrier), member 3b OS=Danio rerio OX=7955 GN=slc25a3b PE=1 SV=1	4	1.47699e+07	1.27587e+07	1.01687e+07	1.75548e+07	6.42723e+06	4.88613e+06	1.88379e+07	18178219	2.00592e+07	1.77193e+07	3.14108e+07	3.15066e+07	2.52727e+07	2.76146e+07	1.24652e+07	1.54124e+07	1.86652e+07	1.67353e+07	1.81875e+07	1.72171e+07	12.2	43.4	4.98	-1.59	0.153
F1QAM8	Vimentin OS=Danio rerio OX=7955 GN=vim PE=1 SV=1	2	22289956	20417506	20425440	184154420	12787749	9806339	3.00403e+07	2.88242e+07	2.93776e+07	2.92143e+07	4.76211e+07	5.03915e+07	5.04896e+07	1.71306e+08	2.43535e+07	3.08763e+07	2.97648e+07	2.56754e+07	2.66365e+07	2.83863e+07	3.29	110	6.59	1.53	0.977
F1QAR7	Myosin light chain kinase 2 OS=Danio rerio OX=7955 GN=mylk2 PE=4 SV=1	63	7.06945e+07	4.55339e+07	2.3894e+07	3.66105e+07	7.02666e+07	1.04538e+08	2.57584e+09	3.05806e+09	3.03447e+09	2.7128e+09	1.73088e+08	1.0226e+08	1.1363e+08	1.8142e+08	1.67049e+08	3.34826e+08	2.56064e+09	2.72854e+09	2.75705e+09	2.64382e+09	29.3	40.8	3.32	1.76	0.125
F1QAV3	YEATS domain-containing 2 OS=Danio rerio OX=7955 GN=yeats2 PE=1 SV=2	1	0	784658	0	1.11622e+06	0	0	952884	773219	789317	575041	319372	1.92538e+06	372672	1.6922e+06	967438	517324	944145	688751	715669	558744	105	56	22	1.21	0.558
F1QBP1	Myozenin 2b OS=Danio rerio OX=7955 GN=myoz2b PE=4 SV=1	8	2.9252e+06	4775372	3.55723e+06	688448	649645	692491	2.74176e+07	3.04663e+07	2.33723e+07	2.72667e+07	1.01388e+07	1.29754e+07	1.0587e+07	4.69262e+06	6.94141e+06	5.89304e+06	2.76288e+07	2.82376e+07	2.20711e+07	2.71994e+07	13.6	19.3	10.8	-1.92	0.0118
F1QBW4	Cadherin 5 OS=Danio rerio OX=7955 GN=cdh5 PE=4 SV=2	1	0	0	0	4.05573e+06	0	0	0	0	0	0	1.11699e+06	119083	531721	448975	595779	896693	164738	304806	366311	329616	85.1	35.3	30.2	1.1	0.606
F1QC03	Zyxin OS=Danio rerio OX=7955 GN=zyx PE=1 SV=1	9	1.97178e+06	664124	1.29523e+06	4.09629e+06	4.51787e+06	6.23718e+06	7.86587e+07	8.78591e+07	8.55583e+07	9.24612e+07	7.84542e+06	6.09387e+06	6.71504e+06	1.20982e+07	1.10602e+07	2.184e+07	7.79374e+07	7.82613e+07	7.88416e+07	9.0841e+07	12.9	39.6	7.68	2.18	0.062
F1QDA6	Acyl-CoA synthetase long chain family member 1b OS=Danio rerio OX=7955 GN=acsl1b PE=1 SV=1	11	1.37356e+07	1.00527e+07	1.90854e+06	0	1.09472e+07	1.41123e+07	1.46851e+07	1.32873e+07	1.60085e+07	16823609	2.08731e+07	2.66236e+07	2.13104e+07	3.88167e+07	2.43905e+07	3.76744e+07	1.60017e+07	1.77922e+07	1.73852e+07	1.74504e+07	14	23.8	4.61	1.47	0.118
F1QDR0	Ubiquitin-associated protein 2a OS=Danio rerio OX=7955 GN=ubap2a PE=4 SV=1	1	0	0	0	0	0	0	708750	645503	739812	712695	201368	161803	291889	366461	468827	352559	702250	574987	670783	692496	30.5	16	8.83	1.81	0.05
F1QDT4	TAF9 RNA polymerase II, TATA box-binding protein (TBP)-associated factor OS=Danio rerio OX=7955 GN=taf9 PE=1 SV=1	5	0	0	0	0	1.30533e+06	0	1.02466e+07	1.18986e+07	1.31501e+07	10550802	2.82869e+06	1.93314e+06	2.47342e+06	2.5488e+06	5.0769e+06	3.23168e+06	1.045e+07	1.1443e+07	1.26379e+07	1.10229e+07	18.7	36.1	8.14	1.5	0.198
F1QE75	TBC1 domain family, member 4 (Fragment) OS=Danio rerio OX=7955 GN=tbc1d4 PE=1 SV=1	2	0	990976	0	941883	0	0	1.82468e+06	1.30237e+06	900608	1.72319e+06	1.15151e+06	2.85633e+06	1.03524e+06	2.03551e+06	858472	1.35454e+06	1.80795e+06	2.29202e+06	1.33652e+06	1.67435e+06	60.6	41.7	22.3	-1.19	0.782
F1QEJ5	Ubiquinol-cytochrome c reductase, complex III subunit VII OS=Danio rerio OX=7955 GN=uqcrq PE=1 SV=1	2	4.47651e+06	3.46203e+06	1318288	0	1.36825e+06	672305	2.80952e+06	7056155	3.92067e+06	5.30703e+06	9.52012e+06	8.49507e+06	5.80112e+06	3.07348e+06	2.94022e+06	3.01237e+06	4.07976e+06	6.28533e+06	3.55484e+06	5.15662e+06	24.2	2.22	25.4	-2.64	0.0233
F1QFC0	Heat shock protein 9 OS=Danio rerio OX=7955 GN=hspa9 PE=1 SV=1	23	1.08008e+08	8.32337e+07	9.28772e+07	1.83122e+08	1.23841e+08	6.44032e+07	1.01667e+08	130400292	1.38937e+08	1.1668e+08	2.45289e+08	1.90733e+08	2.16321e+08	2.87891e+08	2.41591e+08	2.10068e+08	1.17484e+08	1.22292e+08	1.30145e+08	1.22255e+08	12.6	15.9	4.26	1.13	0.356
F1QG80	Ribosomal protein L22 OS=Danio rerio OX=7955 GN=rpl22 PE=1 SV=1	3	6.85905e+06	5.41656e+06	6.97446e+06	10990745	6.97498e+06	5.11798e+06	6.03197e+06	5.59444e+06	7.84645e+06	5.85746e+06	1.4587e+07	1.32911e+07	1.68197e+07	1.66621e+07	1.81502e+07	1.57469e+07	6.155e+06	5.34153e+06	7.11432e+06	5.95224e+06	12	7.2	12	1.13	0.205
F1QGC3	PDZ and LIM domain 5b OS=Danio rerio OX=7955 GN=pdlim5b PE=1 SV=1	10	1.52929e+07	74339574	7.3747e+07	9.27824e+07	50705143	3.9906e+07	1.62111e+08	1.84108e+08	1.95194e+08	1.75906e+08	4.41635e+07	1.85318e+08	1.80439e+08	1.48373e+08	9.98655e+07	1.26233e+08	1.61937e+08	1.65717e+08	1.78495e+08	1.72638e+08	58.6	19.5	4.33	-1.09	0.885
F1QGR1	Pleckstrin homology domain-containing, family A member 7a (Fragment) OS=Danio rerio OX=7955 GN=plekha7a PE=4 SV=1	2	0	0	0	0	0	0	52747520	57246008	55446609	51224950	770273	433515	1.55663e+06	1.01689e+06	994918	1.09239e+06	5.22638e+07	5.09924e+07	5.02731e+07	4.97732e+07	62.6	4.94	2.13	1.12	0.567
F1QH12	Acetyl-CoA carboxylase alpha OS=Danio rerio OX=7955 GN=acaca PE=1 SV=2	46	3.12471e+08	1.78017e+08	2.54561e+08	3.49998e+08	4.44271e+08	2.37328e+08	2.4536e+08	278640911	2.7649e+08	2.38327e+08	6.55298e+08	5.05583e+08	6.16621e+08	5.41801e+08	8.26775e+08	7.50164e+08	2.491e+08	2.51392e+08	2.57834e+08	2.4915e+08	13.1	20.9	1.63	1.19	0.342
F1QI09	Sorbin and SH3 domain-containing 2a OS=Danio rerio OX=7955 GN=sorbs2a PE=1 SV=2	4	1.39804e+06	0	0	0	0	4.82171e+06	62202579	66706574	61822511	6.56073e+07	4.49142e+06	1.0321e+06	1.35252e+06	1.91701e+06	2.74719e+06	1.79664e+06	6.18789e+07	5.96712e+07	5.66519e+07	6.41017e+07	83.4	24	5.25	-1.06	0.795
F1QI59	Serine/threonine-protein phosphatase OS=Danio rerio OX=7955 GN=ppp1cb PE=1 SV=2	2	0	1.11451e+06	904472	4.70105e+06	0	590818	3.56129e+06	3.74594e+06	5.52429e+06	3.83362e+06	439298	2.93728e+06	2.32151e+06	7.12686e+06	3.60023e+06	2.23299e+06	3.81966e+06	3.66144e+06	5.00884e+06	3.85031e+06	68.5	58.5	15.2	2.27	0.243
F1QI68	5'-nucleotidase, cytosolic IB b OS=Danio rerio OX=7955 GN=nt5c1bb PE=4 SV=1	1	0	1.84408e+06	0	0	0	0	0	0	1.0382e+06	2.80798e+06	149272	4.52497e+06	854707	383775	853079	901018	1.50373e+06	1.27589e+06	941325	2.7284e+06	127	40.1	48.3	-2.59	0.845
F1QIB3	Drebrin-like b OS=Danio rerio OX=7955 GN=dbnlb PE=1 SV=1	1	0	0	623243	1.22709e+06	1.52882e+06	997610	3.29812e+06	3.86307e+06	3.3608e+06	2.53824e+06	178265	170466	1.50302e+06	1.86028e+06	2.86716e+06	3.06942e+06	3.26787e+06	3.44107e+06	3.04721e+06	2.4663e+06	124	24.9	13.9	4.21	0.106
F1QJC0	Cysteine and glycine-rich protein 3 (cardiac LIM protein) OS=Danio rerio OX=7955 GN=csrp3 PE=1 SV=1	6	1.50302e+07	1.17135e+07	1.13415e+07	21236287	13460071	1.48272e+07	3.81524e+07	3.93074e+07	4.22141e+07	4.46639e+07	3.37619e+07	2.97215e+07	2.84416e+07	3.3874e+07	2.7078e+07	4.71137e+07	3.79226e+07	3.79841e+07	3.8827e+07	4.33981e+07	9.06	28.3	6.6	1.18	0.486
F1QJR8	SAP30-binding protein OS=Danio rerio OX=7955 GN=sap30bp PE=1 SV=1	1	0	0	0	0	0	0	0	0	0	0	1.12233e+06	891392	218756	547714	545936	701573	549594	148684	526793	361680	63.1	14.9	46.7	-1.24	0.981
F1QJT6	Double-stranded RNA-binding protein Staufen homolog 2 OS=Danio rerio OX=7955 GN=stau2 PE=4 SV=1	11	0	634036	0	1.20881e+06	1.26339e+06	587355	3.60544e+06	4.66341e+06	4.88841e+06	5.80857e+06	4.00822e+06	5.89911e+06	6.80765e+06	7.96619e+06	8.25587e+06	7.86447e+06	6.30605e+06	7.13536e+06	7.04699e+06	7.4158e+06	25.6	2.53	6.79	1.44	0.132
F1QKG7	Tropomyosin 4a OS=Danio rerio OX=7955 GN=tpm4a PE=1 SV=1	5	1.86606e+06	1.98654e+06	0	1.25607e+07	0	0	5.20288e+06	3.63759e+06	7842301	6.27156e+06	5.72514e+06	5.4455e+06	2.04982e+06	6.76345e+06	3.28223e+06	3.21036e+06	8.06062e+06	7.1099e+06	7.11056e+06	7.72443e+06	46.4	46	6.29	1	0.935
F1QL44	Filamin C, gamma b (actin-binding protein 280) OS=Danio rerio OX=7955 GN=flncb PE=1 SV=2	2	0	0	5.10894e+06	0	0	0	0	0	0	0	535508	1.18456e+06	573563	1.19489e+06	1.73836e+06	1.41027e+06	393591	553092	516427	489467	47.6	18.9	14	1.89	0.0955
F1QL68	HECT, UBA and WWE domain-containing 1 (Fragment) OS=Danio rerio OX=7955 GN=huwe1 PE=1 SV=1	4	0	0	0	0	0	0	0	0	0	0	2.84929e+06	1.65405e+06	2.56295e+06	2.78408e+06	2.32838e+06	1.97415e+06	814597	1.67175e+06	1.32337e+06	1.01294e+06	26.5	17.2	31.1	1	0.927
F1QM37	Acetyl-CoA carboxylase beta OS=Danio rerio OX=7955 GN=acacb PE=1 SV=2	155	4.96801e+09	4.23121e+09	3.96231e+09	3.08711e+09	3.45367e+09	1.64213e+09	4637284169	5.1499e+09	4.98704e+09	4.49408e+09	1.06176e+10	1.04085e+10	9.58734e+09	4.73885e+09	6.42013e+09	5.13859e+09	4.60274e+09	4.60208e+09	4.53555e+09	4.40562e+09	5.34	16.2	2.05	-1.88	0.0124
F1QM97	Dishevelled segment polarity protein 2 OS=Danio rerio OX=7955 GN=dvl2 PE=1 SV=1	18	9.59731e+07	9.03212e+07	1.00704e+08	1.14333e+08	9.50607e+07	6.63925e+07	1.43661e+08	1.51253e+08	1.45754e+08	1.46916e+08	2.06426e+08	2.13756e+08	2.43508e+08	1.74833e+08	1.88363e+08	2.06402e+08	1.42637e+08	1.37709e+08	1.39658e+08	1.4316e+08	8.88	8.34	1.82	-1.17	0.0932
F1QNB3	Ankyrin 3b OS=Danio rerio OX=7955 GN=ank3b PE=1 SV=2	30	1.08821e+08	1.31173e+08	83670944	262562632	2.38557e+08	1.60552e+08	3.67629e+08	2.5263e+08	2.0723e+08	1.92534e+08	2.43067e+08	3.05724e+08	2.15372e+08	4.1417e+08	4.64956e+08	5.09739e+08	3.73559e+08	2.27913e+08	2.66864e+08	2.95519e+08	18.2	10.3	21.2	1.82	0.0123
F1QP23	Glutamyl-prolyl-tRNA synthetase OS=Danio rerio OX=7955 GN=eprs PE=1 SV=1	1	0	0	0	0	0	0	0	0	0	244740	533207	288266	160652	321070	357758	708606	179754	568045	157382	237804	57.8	46.3	66.9	1.41	0.408
F1QPL7	Propionyl CoA carboxylase, alpha polypeptide (Fragment) OS=Danio rerio OX=7955 GN=pcca PE=1 SV=1	168	1.45082e+11	1.19969e+11	1.4302e+11	1.02422e+11	1.05554e+11	5.6631e+10	1.45151e+11	1.58674e+11	1.57667e+11	1.43366e+11	3.08632e+11	3.05029e+11	3.44993e+11	1.55379e+11	1.97955e+11	1.74302e+11	1.43917e+11	1.41396e+11	1.42979e+11	1.39314e+11	6.92	12.1	1.42	-1.82	0.00418
F1QQZ1	Splicing factor 3b, subunit 1 OS=Danio rerio OX=7955 GN=sf3b1 PE=1 SV=2	13	1.90889e+06	1.90907e+06	0	1.98696e+06	2.49836e+06	1.61865e+06	3.46387e+06	3.36985e+06	3.43232e+06	3.76593e+06	1.04574e+07	1.09193e+07	9.95459e+06	8.7702e+06	1.17294e+07	1.21516e+07	6.38592e+06	7.19184e+06	6.47829e+06	6.03527e+06	4.62	16.9	7.44	1.04	0.792
F1QRM9	Aminopeptidase OS=Danio rerio OX=7955 GN=npepps PE=1 SV=1	1	14201997	90762288	0	42210038	51843875	10388736	34896341	40413520	40990804	26527151	3.02031e+07	2.22711e+08	1.00557e+08	6.3991e+07	9.72288e+07	3.19638e+07	3.45763e+07	3.59987e+07	3.71661e+07	2.57753e+07	82.7	50.7	15.5	-1.83	0.581
F1QRV6	Nucleosome assembly protein 1-like 4b OS=Danio rerio OX=7955 GN=nap1l4b PE=1 SV=1	2	0	0	0	0	0	0	1.23177e+06	0	0	491763	506989	700452	1.11693e+06	849869	1.18679e+06	1.727e+06	1.36596e+06	972257	1.44643e+06	709326	40.2	35.3	30.7	1.62	0.185
F1QS28	Heterogeneous nuclear ribonucleoprotein A0a OS=Danio rerio OX=7955 GN=hnrnpa0a PE=1 SV=1	1	0	0	0	0	0	0	728266	0	0	452226	772754	379677	600223	607702	564423	842517	721587	680287	567966	439409	33.7	22.3	21	1.15	0.54
F1QSE1	Ventricular myosin heavy chain-like OS=Danio rerio OX=7955 GN=myh7l PE=1 SV=1	153	1.63456e+09	1.21993e+09	1.41683e+09	1.41134e+09	8.96626e+08	4.70023e+08	1.83129e+09	2.02399e+09	2.06752e+09	1.8141e+09	3.43271e+09	3.27299e+09	3.48663e+09	2.18125e+09	1.73244e+09	1.55474e+09	1.8401e+09	1.81901e+09	1.89533e+09	1.78978e+09	3.27	17.7	2.43	-1.86	0.0209
F1QST2	Rho GTPase-activating protein 21b OS=Danio rerio OX=7955 GN=arhgap21b PE=1 SV=1	10	3.36956e+07	2.80317e+07	2.09099e+07	3.44433e+07	3.16879e+07	21067336	4.06943e+07	4.39209e+07	4.61651e+07	3.60135e+07	7.89089e+07	7.21796e+07	5.6126e+07	5.57791e+07	6.49087e+07	6.98435e+07	4.3294e+07	4.06078e+07	4.34393e+07	3.66278e+07	16.9	11.2	7.78	-1.09	0.561
F1QTT3	Junction plakoglobin a OS=Danio rerio OX=7955 GN=jupa PE=1 SV=1	9	0	6.04163e+06	7446605	7121506	5109469	5.65944e+06	1.22742e+07	1.06821e+07	9.38844e+06	1.20304e+07	1.45404e+07	1.7127e+07	2.31725e+07	2.4216e+07	1.39232e+07	2.05694e+07	1.44207e+07	1.21067e+07	1.25119e+07	1.23985e+07	24.2	26.7	8.2	1.07	0.789
F1QTZ9	Si:ch1073-322p19.1 (Fragment) OS=Danio rerio OX=7955 GN=si:ch1073-322p19.1 PE=4 SV=1	1	1.37759e+06	3.14509e+06	2.43258e+06	2.62697e+06	2.64188e+06	965846	2.49649e+06	2751353	2.40754e+06	2.26865e+06	2.9297e+06	7.71738e+06	5.86645e+06	3.98252e+06	4.95462e+06	2.97169e+06	2.4736e+06	2.45079e+06	2.1829e+06	2.20435e+06	43.9	25	6.68	-1.39	0.463
F1QU77	Zmp:0000001167 OS=Danio rerio OX=7955 GN=zmp:0000001167 PE=4 SV=2	1	0	0	0	0	0	0	0	0	224997	198316	168975	571112	980305	323153	797363	917101	213713	98013.5	204003	192695	70.7	46.2	30.2	1.18	0.65
F1QUE3	Ubiquinol-cytochrome c reductase core protein 1 OS=Danio rerio OX=7955 GN=uqcrc1 PE=1 SV=1	4	1.59727e+07	1.19654e+07	1.11707e+07	2.49915e+07	6675163	3.82948e+06	2.44495e+07	17448583	19255759	2.70656e+07	3.41037e+07	4.52882e+07	2.7863e+07	1.29495e+07	1.37283e+07	1.33861e+07	2.44392e+07	2.34144e+07	2.72306e+07	2.62985e+07	24.7	2.92	6.84	-2.68	0.0194
F1QUS9	Ubiquitin-specific peptidase 7 (herpes virus-associated) OS=Danio rerio OX=7955 GN=usp7 PE=1 SV=1	1	0	0	0	0	0	0	0	403107	589327	605892	319974	127978	335243	561846	834928	527775	639859	359071	534339	588721	44.2	26.2	23	2.46	0.0736
F1QUV8	Junction plakoglobin b OS=Danio rerio OX=7955 GN=jupb PE=4 SV=2	1	14987375	8.02064e+06	6238556	47543996	47079840	7411112	21325928	22321436	19799668	18005782	3.18734e+07	1.96809e+07	1.5045e+07	7.20774e+07	8.82942e+07	2.28023e+07	2.11304e+07	1.9883e+07	1.79522e+07	1.74955e+07	39.2	55.9	8.87	2.75	0.151
F1QV15	Vitellogenin 6 (Fragment) OS=Danio rerio OX=7955 GN=vtg6 PE=1 SV=1	2	0	0	1.45325e+06	0	3.59808e+06	1710347	2.73007e+06	2267188	5573733	3273291	561972	1.26514e+06	3.70998e+06	4.4324e+06	7.39865e+06	5.72719e+06	2.91025e+06	2.31068e+06	5.18733e+06	3.53688e+06	89.5	25.4	35.6	3.17	0.113
F1QV31	Keratin 5 OS=Danio rerio OX=7955 GN=krt5 PE=1 SV=1	2	1.81479e+06	2.03509e+06	0	0	0	0	2.29063e+06	3.36119e+06	3.54304e+06	3.11396e+06	4.8362e+06	5.88367e+06	5.74547e+06	1.05689e+06	1.05048e+06	1.54402e+06	2.62182e+06	3.4604e+06	3.68074e+06	3.19092e+06	10.4	23.3	14.1	-4.51	0.00204
F1QVJ5	Zinc finger protein 1047 OS=Danio rerio OX=7955 GN=znf1047 PE=4 SV=1	1	2.41709e+07	2.68258e+07	1.86779e+07	4.89446e+07	3.66309e+07	2.92765e+07	1.25725e+07	1.17993e+07	9.51557e+06	9301689	5.14037e+07	6.58247e+07	4.5044e+07	7.42008e+07	6.86981e+07	9.00773e+07	1.24572e+07	1.05103e+07	8.6277e+06	9.03807e+06	19.7	14.3	17.1	1.44	0.0611
F1QVP9	Extended synaptotagmin-like protein 1b OS=Danio rerio OX=7955 GN=esyt1b PE=1 SV=2	30	3.9454e+07	2.40091e+07	9.78794e+06	1.4038e+08	1.03359e+08	6.54542e+07	3.85153e+07	5.83295e+07	5.28655e+07	4.41354e+07	8.88177e+07	7.5016e+07	7.59072e+07	2.30196e+08	1.95178e+08	2.22602e+08	4.45348e+07	5.50322e+07	5.03372e+07	4.81923e+07	9.67	8.53	8.85	2.7	0.000185
F1QVX3	Myosin, heavy chain b OS=Danio rerio OX=7955 GN=myhb PE=1 SV=1	2	1173233	448303	507907	1.78018e+06	1.29723e+06	0	980882	2.22968e+06	1.41533e+06	1.18749e+06	2.49509e+06	1.53205e+06	1.3777e+06	2.69877e+06	2.43284e+06	2.66702e+06	1.57076e+06	1.9861e+06	1.28327e+06	1.15383e+06	33.6	5.59	24.6	1.44	0.156
F1QVZ7	Myocyte enhancer factor 2d OS=Danio rerio OX=7955 GN=mef2d PE=4 SV=1	1	0	0	0	0	0	0	893535	0	0	0	115527	247595	801434	699471	436092	443838	885341	394453	114477	167639	93.8	28.5	90	1.36	0.405
F1QWE6	Plakophilin 3b OS=Danio rerio OX=7955 GN=pkp3b PE=1 SV=2	11	4.20899e+06	1915872	790068	4.41358e+06	897371	1.9478e+06	1.35075e+07	1.24668e+07	1.60659e+07	1.25816e+07	1.27598e+07	9.99656e+06	7.42892e+06	1.08133e+07	8.42204e+06	1.1265e+07	1.66431e+07	1.37738e+07	1.5228e+07	1.52214e+07	26.5	15	7.7	1.01	0.892
F1QWG8	Nuclear receptor corepressor 1 OS=Danio rerio OX=7955 GN=ncor1 PE=1 SV=1	1	0	0	0	951672	0	0	0	0	0	0	570109	1.0709e+06	1.23247e+06	1.44275e+06	643663	563227	485164	185843	162485	275680	36.1	55.1	53	-1.08	0.765
F1QX43	Dystrobrevin OS=Danio rerio OX=7955 GN=dtnba PE=1 SV=2	1	0	0	0	0	0	0	636417	580192	0	0	802007	120917	591145	684761	792250	449710	630581	516811	550700	388674	69.1	27.3	19.3	1.27	0.502
F1QX79	Acetyl-CoA carboxylase beta (Fragment) OS=Danio rerio OX=7955 GN=acacb PE=1 SV=1	1	1.26693e+06	901819	648264	2.18636e+06	2.35228e+06	1127098	1.19463e+06	2.11454e+06	1.56391e+06	1.38745e+06	2.69437e+06	2.21287e+06	1.56336e+06	3.31455e+06	4.41149e+06	3.46782e+06	1.18367e+06	1.88355e+06	1.41799e+06	1.34813e+06	26.3	15.9	20.6	1.73	0.0503
F1QXK1	Si:ch211-207d6.2 OS=Danio rerio OX=7955 GN=si:ch211-207d6.2 PE=4 SV=2	16	1.04642e+06	917379	0	1.62051e+06	1.14673e+06	0	6.38873e+06	8.41853e+06	9.54652e+06	8.65203e+06	9.01533e+06	9.45374e+06	8.94787e+06	1.10452e+07	1.08903e+07	9.49205e+06	1.10537e+07	1.04128e+07	1.29681e+07	1.37436e+07	3.01	8.17	13	1.15	0.0953
F1QXV8	Phosphoglycerate kinase OS=Danio rerio OX=7955 GN=pgk1 PE=1 SV=1	8	2.21514e+07	1.78911e+07	1.23268e+07	89732929	2.54391e+07	1.6455e+07	2.90115e+07	2.84587e+07	2.39141e+07	21118575	4.85484e+07	3.7578e+07	3.09313e+07	1.36806e+08	4.84888e+07	5.74946e+07	2.89282e+07	2.53498e+07	2.31312e+07	2.26598e+07	22.8	60.1	11.4	2.07	0.176
F1QY96	Synaptotagmin-binding, cytoplasmic RNA-interacting protein OS=Danio rerio OX=7955 GN=syncrip PE=1 SV=2	2	0	0	0	3.33607e+06	0	0	2.47281e+06	243524	285168	1.79862e+06	1.42199e+06	833242	524930	5.38811e+06	1.08061e+06	1.50722e+06	2.45013e+06	2.305e+06	2.83376e+06	1.97519e+06	49.2	89.3	14.9	2.87	0.212
F1QZ50	AHNAK nucleoprotein OS=Danio rerio OX=7955 GN=ahnak PE=1 SV=2	159	4.06232e+08	3.46128e+08	3.1137e+08	4.55883e+08	4.04984e+08	4.20128e+08	6.66366e+08	7.56639e+08	7.77862e+08	6.84316e+08	8.56838e+08	8.765e+08	8.36188e+08	7.11449e+08	8.45491e+08	1.14324e+09	7.13567e+08	7.08701e+08	7.2756e+08	7.04911e+08	2.35	24.6	1.39	1.05	0.848
F1QZU7	Aldehyde dehydrogenase 2 family member, tandem duplicate 2 OS=Danio rerio OX=7955 GN=aldh2.2 PE=1 SV=2	4	1.94688e+07	1.37302e+06	8.23843e+06	7.09517e+06	1.1078e+06	0	1.03047e+07	2109779	1.05823e+07	2.10712e+06	4.1404e+07	8.40862e+06	2.07362e+07	4.57046e+06	3.73686e+06	4.78622e+06	1.03184e+07	1.00653e+07	9.84362e+06	1.06721e+07	70.9	12.7	3.48	-5.39	0.08
F1QZW1	Ventricular myosin heavy chain OS=Danio rerio OX=7955 GN=myh7 PE=1 SV=1	8	0	0	0	4.73664e+06	704669	736792	5.1318e+06	2.66788e+06	710902	3.37311e+06	4.11953e+06	3.20906e+06	4.93701e+06	9.54512e+06	5.95867e+06	5.68779e+06	6.95969e+06	4.20898e+06	4.14239e+06	6.3866e+06	21.1	30.5	26.9	1.73	0.0662
F1R0E4	Nucleoporin 50 OS=Danio rerio OX=7955 GN=nup50 PE=1 SV=1	2	306239	0	0	0	0	166735	0	475510	453575	1.02606e+06	1.05575e+06	1.10022e+06	969621	1.24692e+06	906582	1.1824e+06	719099	821101	535671	1.23001e+06	6.37	16.3	35.5	1.07	0.632
F1R0J8	Dihydrolipoamide acetyltransferase component of pyruvate dehydrogenase complex OS=Danio rerio OX=7955 GN=pdhx PE=1 SV=1	2	1.8534e+06	1.34464e+06	879398	8.06594e+06	2.02334e+06	974983	2.13916e+06	2.82369e+06	1.83862e+06	2.65863e+06	5.01236e+06	3.57578e+06	2.27825e+06	2.61616e+06	4.32285e+06	3.96816e+06	2.11955e+06	2.72258e+06	2.06191e+06	2.89449e+06	37.8	24.8	17.2	1	0.915
F1R101	Eukaryotic translation initiation factor 4 gamma, 1a OS=Danio rerio OX=7955 GN=eif4g1a PE=1 SV=2	2	474380	416176	0	4.27021e+06	949961	0	972932	1.23149e+06	882786	0	1.20041e+06	1.38453e+06	1.47923e+06	6.4737e+06	1.78157e+06	2.3744e+06	1.17865e+06	1.48889e+06	915059	1.58142e+06	10.5	72.1	23.6	2.62	0.174
F1R105	Smoothelin,-like OS=Danio rerio OX=7955 GN=smtnl PE=4 SV=1	5	473402	166324	660591	442738	0	138081	1.01146e+07	1.16278e+07	1.21457e+07	1.2396e+07	2.62617e+06	3.43082e+06	3.73691e+06	3.274e+06	2.95548e+06	2.86108e+06	1.02698e+07	1.05888e+07	1.14407e+07	1.22417e+07	17.6	7.14	7.97	-1.08	0.613
F1R1C0	Acyl-CoA synthetase family member 2, mitochondrial OS=Danio rerio OX=7955 GN=acsf2 PE=1 SV=1	3	0	0	0	0	0	0	0	0	0	0	865782	1.76639e+06	2.45297e+06	1.8475e+06	1.61378e+06	1.68892e+06	526584	1.00817e+06	954280	756315	47	6.95	26.9	1.01	0.781
F1R1I5	Cingulin-like 1 OS=Danio rerio OX=7955 GN=cgnl1 PE=1 SV=2	4	0	631544	547134	867818	502268	419645	0	973636	1.2292e+06	824580	2.19104e+06	2.71883e+06	3.89728e+06	2.80323e+06	2.76725e+06	3.14143e+06	1.36084e+06	2.20414e+06	2.388e+06	1.84435e+06	29.8	7.11	23.2	-1.01	0.933
F1R2H5	Uncharacterized protein OS=Danio rerio OX=7955 PE=4 SV=2	2	0	0	0	0	0	0	1.11214e+06	804176	532011	934570	319824	846744	947383	1.24373e+06	1.28045e+06	1.11373e+06	1.10194e+06	994540	879221	1.12699e+06	47.8	7.22	11	1.72	0.201
F1R2S5	Vitellogenin 5 (Fragment) OS=Danio rerio OX=7955 GN=vtg5 PE=1 SV=1	14	15593292	2.05631e+06	2.52972e+07	1.17715e+07	2.25522e+07	2.69955e+07	32943384	3.74657e+07	4.00569e+07	3.84355e+07	3.67074e+07	2.28944e+07	6.2536e+07	3.16193e+07	4.5798e+07	3.34033e+07	4.08645e+07	4.07557e+07	3.83208e+07	3.90441e+07	49.4	20.9	3.18	-1.1	0.936
F1R319	Solute carrier family 25 (mitochondrial carrier; oxoglutarate carrier), member 11 OS=Danio rerio OX=7955 GN=slc25a11 PE=1 SV=1	2	745181	902264	453011	0	360636	87988	716370	369564	129959	0	1.58476e+06	2.21396e+06	4.22904e+06	1.05162e+06	1.50784e+06	1.21354e+06	1.21616e+06	499062	553094	415492	51.6	18.4	54.8	-2.13	0.13
F1R3D3	Glyceraldehyde-3-phosphate dehydrogenase OS=Danio rerio OX=7955 GN=gapdhs PE=1 SV=1	9	4.78411e+07	3.39005e+07	5.74864e+07	7.03739e+07	1.28582e+08	6.26501e+07	4.864e+07	5.34961e+07	49186491	4.74818e+07	1.02633e+08	9.06535e+07	1.40307e+08	1.10121e+08	2.41677e+08	1.93774e+08	4.89706e+07	4.81276e+07	4.49443e+07	4.65918e+07	23.3	36.6	3.76	1.64	0.182
F1R3G4	Myosin, heavy chain 10, non-muscle OS=Danio rerio OX=7955 GN=myh10 PE=3 SV=1	2	215354	2.00406e+06	0	2.14936e+07	0	0	759673	1.13745e+06	1.09371e+06	947491	1.49795e+06	5.66041e+06	830175	1.16935e+06	1.33641e+06	1.04372e+06	877877	1.51932e+06	1.34583e+06	1.04196e+06	98.3	12.4	24.2	-2.25	0.482
F1R3P1	Transmembrane p24-trafficking protein 4 OS=Danio rerio OX=7955 GN=tmed4 PE=1 SV=1	1	0	0	0	6923410	0	0	0	0	0	0	1.13404e+06	210235	444210	325091	903351	507247	404106	344016	441543	287901	80.6	51.1	18.3	-1.03	0.854
F1R4G2	Bleomycin hydrolase OS=Danio rerio OX=7955 GN=blmh PE=1 SV=1	1	402142	362122	0	1176357	632954	0	349605	668094	710116	476653	855229	888569	538586	1.78337e+06	1.18705e+06	2.0935e+06	346399	595110	643857	463144	25.4	27.3	26.2	2.22	0.0273
F1R540	Reticulon OS=Danio rerio OX=7955 GN=rtn1b PE=1 SV=1	2	406095	0	0	1.72488e+06	1600789	1.0541e+06	839995	525801	905718	374233	1.19783e+06	346349	1.85097e+06	2.61494e+06	3.00214e+06	3.24322e+06	1.04638e+06	800490	821208	942316	66.7	10.7	12.7	2.61	0.144
F1R653	Histone deacetylase OS=Danio rerio OX=7955 GN=hdac1 PE=1 SV=1	1	0	0	0	3.03717e+06	0	0	942509	0	0	0	129044	134796	165025	4.60439e+06	904985	406208	933865	360649	182988	161427	13.5	116	88	13.8	0.0951
F1R6C7	Myosin, heavy chain a OS=Danio rerio OX=7955 GN=myha PE=1 SV=2	3	1.39904e+06	715176	0	5.68627e+06	1.13793e+06	886726	0	896141	504924	406454	3.16626e+06	2.50086e+06	3.66779e+06	9.46195e+06	2.83922e+06	3.23264e+06	1.43721e+06	1.17055e+06	883448	1.09978e+06	18.8	71.8	19.9	1.66	0.443
F1R6I1	Cytochrome c oxidase subunit IV isoform 1,-like OS=Danio rerio OX=7955 GN=cox4i1l PE=1 SV=2	1	1.44008e+06	0	0	0	0	0	950801	1.23221e+06	882595	0	3.0626e+06	307346	918220	871629	398853	835090	942081	1.09761e+06	800243	798818	101	37.5	15.6	-2.04	0.65
F1R833	Nebulin-related-anchoring protein OS=Danio rerio OX=7955 GN=nrap PE=4 SV=1	22	1.4505e+06	2.28058e+06	650683	1.60157e+07	2.47372e+07	1.07359e+07	8.82952e+06	2.58279e+07	1.99201e+07	1.36453e+07	1.07624e+07	1.83904e+07	1.25048e+07	3.50404e+07	5.96859e+07	4.72099e+07	2.31029e+07	2.7408e+07	2.458e+07	2.1887e+07	28.8	26	9.81	3.41	0.00521
F1R8A2	Pleckstrin homology domain-containing, family A member 5 OS=Danio rerio OX=7955 GN=plekha5 PE=4 SV=2	32	1.81278e+07	4.73159e+08	8.11067e+06	19110946	1.12372e+07	1.55619e+07	6.01252e+07	7.35645e+07	7.86213e+07	8.07546e+07	5.04155e+07	1.17153e+09	3.2225e+07	4.52918e+07	3.77783e+07	4.94427e+07	6.77605e+07	7.47238e+07	8.10747e+07	8.02128e+07	156	13.4	8.08	-9.46	0.456
F1R8U0	Keratin 94 OS=Danio rerio OX=7955 GN=krt94 PE=1 SV=1	2	8590828	4.00809e+06	3.63997e+06	12254282	1.44113e+07	1.37156e+06	9.24573e+06	9.35645e+06	9.37108e+06	8.5979e+06	1.89619e+07	1.01433e+07	9.15964e+06	1.90423e+07	2.70271e+07	4.94337e+06	9.32351e+06	8.81301e+06	8.88347e+06	8.62287e+06	42.3	65.8	3.33	1.33	0.844
F1R9V3	Si:dkey-4p15.3 OS=Danio rerio OX=7955 GN=si:dkey-4p15.3 PE=1 SV=1	6	2.75956e+07	2.07379e+07	2.54852e+07	6.75899e+07	2.56858e+07	2.04887e+07	2.63096e+07	1.90279e+07	2.0403e+07	1.94873e+07	5.88047e+07	5.08863e+07	6.20641e+07	1.02467e+08	5.75149e+07	6.3039e+07	2.63647e+07	1.74586e+07	1.88185e+07	2.08769e+07	10	33	18.8	1.3	0.326
F1R9Y8	High density lipoprotein-binding protein a OS=Danio rerio OX=7955 GN=hdlbpa PE=1 SV=1	2	1.47086e+06	0	0	1.18229e+06	5.20314e+06	1.03278e+06	3859174	592334	1.20922e+06	1.13608e+06	3.48648e+06	1.43546e+06	917860	6.07426e+06	9.75805e+06	4.57295e+06	4.26443e+06	1.05246e+06	1.09639e+06	1.10388e+06	69.8	39.2	84.6	3.49	0.0533
F1RA35	Microtubule-actin crosslinking factor 1a OS=Danio rerio OX=7955 GN=macf1a PE=1 SV=2	5	0	1.86761e+06	0	4.20636e+06	0	574944	973070	2.17846e+06	0	1.93642e+06	1.19163e+06	6.21511e+06	1.81776e+06	7.67321e+06	6.30034e+06	4.08329e+06	2.86583e+06	3.39684e+06	3.8728e+06	4.36772e+06	89	30.1	17.7	1.96	0.205
F1RB02	Castor zinc finger 1 OS=Danio rerio OX=7955 GN=casz1 PE=4 SV=2	1	0	0	0	0	0	0	0	0	0	0	1.02407e+06	132990	1.03917e+06	339709	552065	367788	394562	264738	276401	551672	70.9	27.5	35.9	-1.74	0.762
F1RBA0	Vitellogenin 4 OS=Danio rerio OX=7955 GN=vtg4 PE=1 SV=2	7	8.91437e+06	1974271	8.35859e+06	2.47706e+07	1.27441e+07	5.187e+06	1.23987e+07	1.46092e+07	1.94945e+07	1.53877e+07	2.04512e+07	1.4798e+07	2.28377e+07	4.18022e+07	2.53626e+07	1.99978e+07	1.3637e+07	1.4326e+07	1.82036e+07	1.61691e+07	21.3	39.1	13.1	1.5	0.229
F1RBA4	Desmoplakin a OS=Danio rerio OX=7955 GN=dspa PE=1 SV=2	2	2.25179e+07	1.19088e+07	10925119	1.01979e+08	5.58855e+07	11297603	3.30001e+07	37835700	3.76454e+07	3.21953e+07	4.78885e+07	2.92215e+07	2.72339e+07	1.54602e+08	1.04808e+08	3.55314e+07	3.26975e+07	3.42631e+07	3.41328e+07	3.12828e+07	32.8	60.8	4.23	2.83	0.165
F1RBH3	MICOS complex subunit OS=Danio rerio OX=7955 GN=chchd6b PE=1 SV=1	1	0	0	0	397027	0	330169	0	816393	908218	1.17717e+06	292188	912333	152458	601899	572137	1.01585e+06	810863	727209	823476	1.14381e+06	89.4	34	20.9	1.61	0.303
F1RBK4	Catenin (cadherin-associated protein), delta 2b OS=Danio rerio OX=7955 GN=ctnnd2b PE=1 SV=2	1	0	0	0	0	0	0	0	0	0	1.62212e+06	764560	128475	277540	597296	433017	820715	180110	424430	231650	1.57614e+06	85.3	31.5	109	1.58	0.316
F1RCA1	Ubiquitin-like modifier-activating enzyme 1 OS=Danio rerio OX=7955 GN=uba1 PE=1 SV=1	1	0	782810	0	4.84804e+06	0	0	0	0	0	0	1.04372e+06	1.92085e+06	488345	444078	749282	795987	166865	132819	155241	143065	62.8	28.8	9.88	-1.74	0.396
F1RD28	Alpha-amylase OS=Danio rerio OX=7955 GN=zgc:66313 PE=1 SV=1	1	0	0	0	0	0	0	2.52682e+06	0	0	3.65768e+06	445587	932757	171938	502866	481526	906314	2.50365e+06	2.34515e+06	2.77403e+06	3.55401e+06	74.6	38	19.2	1.22	0.537
F1RDA6	NADH dehydrogenase (ubiquinone) Fe-S protein 1 OS=Danio rerio OX=7955 GN=ndufs1 PE=1 SV=1	2	845856	959820	1.10486e+06	0	0	532178	1.87653e+06	1.81318e+06	1825889	1.62831e+06	2.08306e+06	2.52087e+06	2.66449e+06	1.08518e+06	1.33359e+06	2.13519e+06	1.85933e+06	1.6151e+06	1.65552e+06	1.58216e+06	12.5	36.2	7.42	-1.6	0.115
F1RDB0	Tudor domain-containing protein 3 OS=Danio rerio OX=7955 GN=tdrd3 PE=1 SV=2	1	0	0	0	1.62362e+06	0	0	0	0	0	0	862209	729656	199849	2.46144e+06	817381	649615	297474	570135	291988	587489	58.7	76.5	37.6	2.19	0.276
F1RDE2	NCK-associated protein 5-like OS=Danio rerio OX=7955 GN=nckap5l PE=4 SV=2	4	0	0	1.14573e+06	0	0	0	1.67817e+06	961892	1.84761e+06	1.28397e+06	1.25669e+06	1.3057e+06	3.91516e+06	2.17485e+06	2.65461e+06	1.9755e+06	2.71489e+06	1.72311e+06	2.53446e+06	2.4045e+06	70.4	15.4	18.5	1.05	0.662
F1RDV2	NADH dehydrogenase [ubiquinone] 1 alpha subcomplex subunit 10, mitochondrial OS=Danio rerio OX=7955 GN=ndufa10 PE=1 SV=1	2	2.8843e+06	3.00366e+06	2.20082e+06	0	1.68782e+06	306674	678339	877408	0	2.58912e+06	6.74384e+06	7.63206e+06	5.79964e+06	1.62613e+06	3.99763e+06	1.65274e+06	1.11714e+06	994799	1.24213e+06	2.51574e+06	13.6	56.1	48.1	-2.77	0.0566
F6NIQ9	GATA zinc finger domain-containing 2B (Fragment) OS=Danio rerio OX=7955 GN=gatad2b PE=1 SV=1	1	0	0	0	0	0	0	0	0	0	0	221376	461560	147319	469265	491275	504254	197382	422481	245039	295170	59.4	3.62	33.4	1.76	0.178
F6NJ58	Erythrocyte membrane protein band 4.1-like 5 OS=Danio rerio OX=7955 GN=epb41l5 PE=1 SV=1	3	0	0	0	0	0	0	0	832009	0	1.9548e+06	1.74208e+06	1.57357e+06	1.88609e+06	1.98649e+06	2.01629e+06	1.96471e+06	785617	1.35105e+06	602582	2.2916e+06	9.02	1.3	60.4	1.15	0.113
F6NJU6	Zgc:100918 OS=Danio rerio OX=7955 GN=zgc:100918 PE=1 SV=1	2	0	0	0	12057836	7.63622e+06	6.6271e+06	392837	0	3.55669e+06	0	538933	663722	422632	1.82799e+07	1.43211e+07	2.2656e+07	649194	917789	3.22483e+06	727350	22.3	22.6	89.5	34	4.56e-05
F6NVB1	SWI/SNF-related, matrix-associated, actin-dependent regulator of chromatin, subfamily d, member 3b OS=Danio rerio OX=7955 GN=smarcd3b PE=1 SV=1	1	0	0	0	0	0	0	413446	0	0	0	505602	678045	690051	389412	474560	556698	409655	383777	182953	170161	16.5	17.7	44.5	-1.32	0.127
F6NW08	Si:ch211-13c6.2 OS=Danio rerio OX=7955 GN=si:ch211-13c6.2 PE=1 SV=1	1	35577924	28096948	33899072	46759536	28833552	20968998	4.06694e+07	39216848	3.22877e+07	3.44293e+07	7.5663e+07	6.89439e+07	8.17515e+07	7.08881e+07	5.40749e+07	6.45168e+07	4.02964e+07	3.49327e+07	2.9275e+07	3.34536e+07	8.49	13.4	13.2	-1.19	0.138
F6NYL9	Hyperpolarization-activated cyclic nucleotide-gated potassium channel 4 (Fragment) OS=Danio rerio OX=7955 GN=hcn4 PE=4 SV=1	3	1026368	1.65731e+06	4920948	1.11729e+06	0	435755	303183	596868	1.96388e+06	905047	2.55615e+06	4.38714e+06	1.22187e+07	3.14273e+06	2.068e+06	1.69677e+06	1.66832e+06	1.82105e+06	2.02527e+06	1.57355e+06	80.4	32.6	11.1	-2.77	0.201
F6P4R0	Formin homology 2 domain-containing 3a OS=Danio rerio OX=7955 GN=fhod3a PE=4 SV=1	23	5.0546e+06	4.46831e+06	3.54742e+06	8.0513e+06	971601	2.64e+06	1.64503e+07	1.4497e+07	1.46934e+07	1.05869e+07	2.12017e+07	2.10264e+07	3.07249e+07	1.37342e+07	1.58796e+07	2.00137e+07	2.20377e+07	1.74923e+07	1.83039e+07	1.75749e+07	22.8	19.3	11.4	-1.47	0.0848
F6P528	Transmembrane protein 209 OS=Danio rerio OX=7955 GN=tmem209 PE=1 SV=1	1	551316	0	447691	3.64344e+06	0	481495	0	0	0	0	1.17247e+06	1.76182e+06	1.07966e+06	5.52351e+06	4.68991e+06	1.48145e+06	290328	398994	135685	518290	27.7	54.7	48.4	2.91	0.137
F6P6X1	YLP motif-containing 1 OS=Danio rerio OX=7955 GN=ylpm1 PE=1 SV=1	3	0	0	0	0	0	0	553264	480905	0	0	2.96412e+06	1.07152e+06	1.73798e+06	1.83458e+06	2.07906e+06	1.9832e+06	1.24978e+06	970669	1.36504e+06	919247	49.9	6.27	19.1	1.02	0.756
F6PC65	Solute carrier family 8 (sodium/calcium exchanger), member 1a OS=Danio rerio OX=7955 GN=slc8a1a PE=1 SV=1	9	8.47467e+06	9.70997e+06	7.41516e+06	1.10626e+07	5.70528e+06	6.54039e+06	3.71568e+07	2.50774e+07	3.15098e+07	2.85559e+07	1.92799e+07	2.67055e+07	2.15642e+07	1.88434e+07	1.43595e+07	2.34743e+07	4.16556e+07	3.69511e+07	3.54303e+07	3.96245e+07	16.9	24.1	7.21	-1.19	0.346
F8W2V6	Isocitrate dehydrogenase [NAD] subunit, mitochondrial OS=Danio rerio OX=7955 GN=idh3b PE=1 SV=1	1	0	0	0	0	0	0	0	0	0	798032	269777	344131	479188	502024	445330	571313	106961	111319	291783	775415	29.1	12.5	97.9	1.39	0.157
F8W315	Palladin, cytoskeletal-associated protein OS=Danio rerio OX=7955 GN=palld PE=1 SV=3	20	1.78933e+06	5.625e+07	1.12887e+06	5.22673e+06	2.40116e+06	659894	3.23187e+07	3.93317e+07	2.80229e+07	2.99731e+07	1.35441e+07	1.43506e+08	4.58708e+07	1.9002e+07	1.62366e+07	1.75211e+07	3.55703e+07	3.57157e+07	3.28289e+07	3.40718e+07	100	7.87	3.95	-3.85	0.304
F8W371	Ankyrin 3a OS=Danio rerio OX=7955 GN=ank3a PE=1 SV=1	47	3.36738e+06	3.46996e+06	9.42556e+06	2.27521e+07	4.76138e+06	5.5805e+06	1.47835e+08	1.49485e+08	1.54667e+08	149996404	2.8235e+07	2.75262e+07	3.62706e+07	5.29972e+07	3.91827e+07	4.28242e+07	1.60309e+08	1.43228e+08	1.49249e+08	1.48655e+08	15.8	15.9	4.76	1.47	0.0381
F8W3K6	Exosome component 2 OS=Danio rerio OX=7955 GN=exosc2 PE=1 SV=1	1	0	0	0	0	0	613703	0	0	0	0	487006	479439	395537	409946	683441	1.88823e+06	158353	488075	137197	157201	11.2	79.1	71.8	2.19	0.324
F8W3L6	Myosin, heavy chain 9a, non-muscle (Fragment) OS=Danio rerio OX=7955 GN=myh9a PE=1 SV=1	3	0	0	2.316e+06	4.96539e+07	5.956e+06	712039	2.50751e+06	6.05004e+06	1.58918e+06	2.78527e+06	1.40492e+06	1.26255e+06	6.20124e+06	4.60955e+07	1.15637e+07	1.0763e+07	2.68758e+06	5.38913e+06	3.52638e+06	3.30924e+06	95.1	88.4	31.2	7.72	0.0408
F8W3V3	ARVCF, delta catenin family member b (Fragment) OS=Danio rerio OX=7955 GN=arvcfb PE=1 SV=1	1	0	0	0	0	0	522089	126708736	141654940	139782097	135925924	201029	583428	408177	378411	793718	1.60635e+06	1.25547e+08	1.2618e+08	1.26739e+08	1.32074e+08	48.2	67.4	2.35	2.33	0.219
F8W417	Troponin I type 1b (skeletal, slow) (Fragment) OS=Danio rerio OX=7955 GN=tnni1b PE=1 SV=1	5	5.74938e+06	4701144	3.08503e+06	23674830	1.7348e+07	5.68643e+06	2.54923e+07	3.24899e+07	29467749	2.61051e+07	1.28692e+07	1.34046e+07	8.45819e+06	3.68289e+07	3.43569e+07	1.79021e+07	2.62307e+07	2.92115e+07	2.8629e+07	2.55506e+07	23.4	34.6	6.52	2.57	0.0365
F8W432	AMP deaminase OS=Danio rerio OX=7955 GN=ampd3a PE=1 SV=1	1	0	0	312211	1.15959e+06	0	0	2.17205e+06	1.73136e+06	2.52846e+06	2.03529e+06	464817	310964	752934	1.75796e+06	839805	600749	2.15213e+06	1.54222e+06	2.29254e+06	1.97761e+06	44	57.3	16.4	2.09	0.164
F8W480	Ankyrin 3a (Fragment) OS=Danio rerio OX=7955 GN=ank3a PE=4 SV=1	1	0	0	0	0	0	0	0	0	480690	0	427420	130207	457162	824153	598172	873007	416135	521409	435838	349046	53.4	19.2	16.5	2.26	0.138
F8W4M7	Aconitate hydratase, mitochondrial (Fragment) OS=Danio rerio OX=7955 GN=aco2 PE=1 SV=2	12	4.19455e+07	1.93539e+07	2.72484e+07	2.78615e+07	18351234	6.5991e+06	3.34014e+07	3.36652e+07	3.65339e+07	3.56168e+07	9.01934e+07	6.36817e+07	7.08286e+07	4.49672e+07	3.67359e+07	3.24716e+07	3.40932e+07	3.12846e+07	3.43106e+07	3.53093e+07	18.3	16.7	5.12	-1.97	0.00865
F8W4U4	Xin actin-binding repeat-containing 2a OS=Danio rerio OX=7955 GN=xirp2a PE=3 SV=1	3	3.17696e+06	1.08235e+06	0	1.51456e+06	2.30657e+06	985099	0	0	0	0	7.03772e+06	3.65053e+06	4.08648e+06	3.97064e+06	4.95822e+06	4.40106e+06	1.2549e+06	883002	1.03124e+06	850824	37.4	11.1	18.3	-1.11	0.787
F8W5H2	Popeye domain-containing 2 OS=Danio rerio OX=7955 GN=popdc2 PE=1 SV=1	11	4.12419e+07	8.36589e+06	7164766	5.86305e+06	1.27527e+07	2.79549e+07	7.31545e+07	1.02144e+08	8.93938e+07	9.22101e+07	1.69917e+07	2.22476e+07	2.0473e+07	1.64382e+07	1.62346e+07	1.56286e+07	7.96407e+07	9.22588e+07	8.18356e+07	9.34984e+07	13.4	2.62	8.16	-1.24	0.118
F8W5K5	Ryanodine receptor 2b (cardiac) OS=Danio rerio OX=7955 GN=ryr2b PE=4 SV=3	66	4.47677e+07	7.82096e+07	3.52787e+07	3.38657e+07	5.26257e+07	2.0544e+07	8.41727e+07	8.86917e+07	1.08777e+08	7.40086e+07	1.32982e+08	1.24842e+08	1.43994e+08	9.67047e+07	1.18798e+08	1.17055e+08	1.13364e+08	9.93728e+07	1.09589e+08	9.05582e+07	7.18	11.1	9.98	-1.21	0.0823
G1K2E7	Cadherin-2 OS=Danio rerio OX=7955 GN=cdh2 PE=1 SV=1	37	2.98612e+07	9.94043e+06	1.11192e+07	7.62515e+07	2.01846e+07	1.86714e+07	6.15318e+08	6.79786e+08	6.52102e+08	5.946e+08	7.86716e+07	4.15954e+07	5.02909e+07	1.49693e+08	5.60016e+07	7.5822e+07	6.16511e+08	6.10822e+08	5.95334e+08	5.90662e+08	34.1	52.6	2.04	1.65	0.274
G1K2R4	Calmodulin-regulated spectrin-associated protein 1-B OS=Danio rerio OX=7955 GN=camsap1b PE=3 SV=2	3	0	4.56378e+06	0	0	1.36826e+06	0	529854	0	410549	451547	1.48893e+06	781788	1.44648e+06	1.30681e+06	4.3755e+06	1.68632e+06	900776	1.22523e+06	683629	998532	32	68.1	23.6	1.98	0.258
G1K2X0	Titin, tandem duplicate 1 OS=Danio rerio OX=7955 GN=ttn.1 PE=1 SV=2	4	604402	0	0	2.02986e+06	0	0	5.07886e+06	7.95463e+06	8.59086e+06	6.09348e+06	2.42751e+06	2.02799e+06	1.15298e+06	4.4522e+06	2.46425e+06	2.53321e+06	7.34086e+06	7.21433e+06	7.90775e+06	6.08189e+06	34.9	35.8	10.7	1.68	0.149
H0WES8	Si:dkeyp-80c12.10 OS=Danio rerio OX=7955 GN=si:dkeyp-80c12.10 PE=1 SV=1	2	0	1.3135e+06	0	0	0	0	1.51346e+06	1.25138e+06	5.34548e+06	3.45753e+06	349990	3.91407e+06	1.79075e+06	1.00688e+06	988668	1.03258e+06	2.7736e+06	2.64579e+06	4.84671e+06	3.35954e+06	88.8	2.19	29.6	-2	0.723
H1ZXA6	Ryanodine receptor 2b protein (Fragment) OS=Danio rerio OX=7955 GN=ryr2b PE=2 SV=1	2	0	0	0	0	0	0	0	3.69551e+06	2935842	3.7967e+06	1.40976e+06	260076	499731	1.60732e+06	1.34903e+06	1.07656e+06	3.2114e+06	3.70368e+06	2.77684e+06	4.23892e+06	83.9	19.7	18.1	1.86	0.223
H9GXQ9	Protein-methionine sulfoxide oxidase mical3a OS=Danio rerio OX=7955 GN=mical3a PE=4 SV=2	4	0	0	0	0	421479	0	0	0	1.16147e+06	0	1.8934e+06	1.74297e+06	2.06838e+06	1.92814e+06	2.87398e+06	2.9716e+06	1.63288e+06	689805	1.9749e+06	897302	8.56	22.2	46.6	1.36	0.159
K7W5A6	Shroom3v1 OS=Danio rerio OX=7955 GN=shroom3 PE=2 SV=1	57	1.08502e+07	1.20258e+07	1.9631e+06	1.57508e+07	1.40216e+07	4.36868e+06	1.3533e+08	1.34365e+08	1.53058e+08	1.38477e+08	4.52555e+07	5.04364e+07	4.00456e+07	5.14043e+07	5.71355e+07	4.7929e+07	1.43127e+08	1.3676e+08	1.419e+08	1.49592e+08	11.5	8.91	3.69	1.15	0.166
P00330	Alcohol dehydrogenase 1 OS=Saccharomyces cerevisiae (strain ATCC 204508 / S288c) GN=ADH1 PE=1 SV=5	25	1.16492e+10	1.02652e+10	9.69931e+09	8.94843e+09	1.11676e+10	1.28791e+10	8.99477e+09	1.02518e+10	1.0265e+10	9.18574e+09	2.47742e+10	2.51885e+10	2.33926e+10	1.35723e+10	2.09439e+10	3.9629e+10	8.91317e+09	9.13186e+09	9.30717e+09	8.92925e+09	3.85	54.3	2.06	1.01	0.808
P00331	Alcohol dehydrogenase 2 OS=Saccharomyces cerevisiae (strain ATCC 204508 / S288c) GN=ADH2 PE=1 SV=3	1	194268480	137980494	159775758	156452730	163949656	160565104	118775899	1.40256e+08	137986597	148665652	4.13147e+08	3.38575e+08	3.85317e+08	2.37185e+08	3.07474e+08	4.94022e+08	1.17687e+08	1.24934e+08	1.25112e+08	1.44452e+08	9.94	38.3	8.96	-1.09	0.601
P02662	Alpha-S1-casein OS=Bos taurus GN=CSN1S1 PE=1 SV=2	12	1.09787e+08	2.51866e+08	2.78533e+08	2.20257e+08	2.3842e+08	3.71778e+08	1.96361e+08	2.2829e+08	2.43054e+08	2.26433e+08	3.125e+08	6.22474e+08	6.71844e+08	3.36221e+08	4.47588e+08	1.13966e+09	1.97722e+08	2.03726e+08	2.20778e+08	2.20185e+08	36.4	67.9	5.54	1.2	0.849
P02663	Alpha-S2-casein OS=Bos taurus GN=CSN1S2 PE=1 SV=2	5	6.64991e+06	1.07772e+07	1.7078e+07	1.19206e+07	1.81753e+07	3.96478e+07	1.53962e+07	1.51066e+07	1.57399e+07	1.63257e+07	1.61173e+07	2.90567e+07	4.14576e+07	4.38693e+07	3.40861e+07	1.21987e+08	1.54091e+07	1.35628e+07	1.44838e+07	1.60897e+07	43.9	72.3	7.39	2.31	0.201
P02666	Beta-casein OS=Bos taurus GN=CSN2 PE=1 SV=2	1	0	0	0	0	756034	917883	954585	931187	968380	1.05667e+06	424474	220282	268772	3.03015e+06	1.41788e+06	2.82412e+06	945831	829463	878024	1.02672e+06	35	36.2	9.31	7.96	0.00315
P79735	GTP-binding nuclear protein Ran OS=Danio rerio OX=7955 GN=ran PE=2 SV=1; Duplicate proteins: Q6GTE7|Q6GTE7_DANRE	3	4.51719e+06	4.92824e+06	2.5835e+06	3.11282e+07	12860251	311004	1.08341e+07	1.15119e+07	1.20609e+07	16007960	1.0245e+07	1.2562e+07	1.36879e+07	4.71908e+07	2.41183e+07	1.19251e+07	1.07348e+07	1.02544e+07	1.09356e+07	1.55543e+07	14.4	64.6	20.8	2.28	0.225
Q08BA1	ATP synthase subunit alpha OS=Danio rerio OX=7955 GN=atp5fa1 PE=1 SV=1	35	2.79593e+08	2.72365e+08	2.76493e+08	3.26264e+08	2.64761e+08	1.44106e+08	4.14779e+08	4.77398e+08	4.83089e+08	4.00168e+08	6.09124e+08	7.29356e+08	6.69323e+08	4.46529e+08	4.87181e+08	4.58933e+08	4.27866e+08	4.274e+08	4.39903e+08	4.32149e+08	8.98	4.49	1.34	-1.44	0.00885
Q08BK3	Dsc2l protein (Fragment) OS=Danio rerio OX=7955 GN=dsc2l PE=2 SV=1	32	4.15797e+07	1.06593e+07	1.44328e+08	7996328	9.10617e+06	2.83059e+06	9.43911e+07	92003752	9.06954e+07	9.05344e+07	1.01243e+08	2.88493e+07	3.62827e+08	2.76471e+07	2.79824e+07	2.60094e+07	1.02992e+08	9.77946e+07	9.16197e+07	9.40486e+07	107	3.88	5.13	-6.04	0.212
Q0H2G3	Aldehyde dehydrogenase 1 family member A3 OS=Danio rerio OX=7955 GN=aldh1a3 PE=2 SV=1	1	0	0	0	6.24133e+06	0	0	0	0	1782428	0	960103	349752	288565	342315	480730	379434	170229	179093	1.61612e+06	288206	69.7	17.9	125	-1.33	0.737
Q0P3X9	Zgc:153713 OS=Danio rerio OX=7955 GN=zgc:153713 PE=2 SV=1	2	0	0	0	6.83875e+06	2.50116e+06	229410	2.85892e+06	482326	407410	820359	290366	505796	1.32981e+06	1.03676e+07	6.98838e+06	9.25442e+06	3.11336e+06	835245	505763	929400	77.4	19.4	88.6	12.5	0.0201
Q0P485	Coiled-coil domain-containing protein 85C-A OS=Danio rerio OX=7955 GN=ccdc85ca PE=2 SV=1	5	0	0	0	0	0	0	0	0	577660	809301	2.74251e+06	980058	2.28113e+06	2.72598e+06	3.77747e+06	2.42448e+06	1.74796e+06	1.23698e+06	1.70792e+06	1.54582e+06	45.7	23.9	14.9	1.49	0.276
Q0PWB8	PDZ and LIM domain 3b OS=Danio rerio OX=7955 GN=pdlim3b PE=2 SV=1	8	2.1734e+06	480392	1.72747e+06	8.76035e+06	5.21349e+06	8.06508e+06	2.10549e+07	2.55589e+07	2.90086e+07	2.37083e+07	7.51764e+06	8.33543e+06	6.13973e+06	1.53248e+07	1.14172e+07	2.60205e+07	2.18655e+07	2.54512e+07	2.63019e+07	2.83414e+07	15.1	43	10.6	2.4	0.0618
Q0PWB9	PDZ and LIM domain 4 OS=Danio rerio OX=7955 GN=pdlim4 PE=1 SV=1	1	0	0	0	0	0	0	0	0	1.20297e+06	918326	235721	371177	187455	351493	628620	485583	510857	608216	1.09072e+06	892300	36	28.4	34.2	1.85	0.0771
Q1ECX3	Tgm2b protein OS=Danio rerio OX=7955 GN=tgm2b PE=1 SV=1	1	4.25634e+06	3243180	1.86761e+06	8.17848e+06	0	248650	3.16751e+06	4051656	5087039	5.00373e+06	9.05189e+06	7.95807e+06	4.50395e+06	1.23987e+07	4.98152e+06	765040	3.13846e+06	3.60905e+06	4.61238e+06	4.86192e+06	33.1	97.4	20.1	-1.19	0.519
Q1L8R2	Splicing factor proline/glutamine-rich OS=Danio rerio OX=7955 GN=sfpq PE=1 SV=1	13	523388	1.29766e+06	727150	7.77727e+06	2.73152e+06	322335	1.15419e+07	1.21388e+07	1.01006e+07	10046480	7.47728e+06	7.17049e+06	6.97405e+06	1.25288e+07	1.17354e+07	1.16259e+07	1.37052e+07	1.21367e+07	1.33174e+07	1.37272e+07	3.52	4.12	5.65	1.66	9.58e-05
Q1L8T2	Ubiquitin-associated protein 2-like OS=Danio rerio OX=7955 GN=ubap2l PE=4 SV=2	8	0	5.44064e+06	0	0	0	0	9.19741e+06	8.64482e+06	1.18555e+07	1.00119e+07	3.24136e+06	8.10277e+06	4.0228e+06	4.48229e+06	4.53485e+06	4.12581e+06	9.87374e+06	8.53791e+06	1.13468e+07	1.18277e+07	51	5.08	14.4	-1.17	0.807
Q1L9A3	Protein phosphatase 1, regulatory subunit 13-like OS=Danio rerio OX=7955 GN=ppp1r13l PE=4 SV=1	18	2.24737e+07	1.58079e+07	13816265	9.01941e+07	6.05483e+07	9.05503e+06	1.04168e+08	8.71931e+07	7.99227e+07	7.99108e+07	5.60581e+07	4.77334e+07	4.25921e+07	1.45889e+08	1.2326e+08	3.61265e+07	1.04712e+08	8.05462e+07	8.05825e+07	8.52468e+07	13.9	57	13.1	2.09	0.317
Q1LVF0	Laminin subunit gamma-1 OS=Danio rerio OX=7955 GN=lamc1 PE=2 SV=2	1	324427	398687	0	1.09118e+06	430546	0	470694	0	600568	500033	689954	978293	945811	1.65424e+06	807452	1.03523e+06	466377	608918	544531	485861	18.1	37.6	12.2	1.34	0.357
Q1LVK6	Vasodilator-stimulated phosphoprotein b OS=Danio rerio OX=7955 GN=vaspb PE=1 SV=2	1	0	0	0	0	0	0	0	0	0	0	235046	544469	1.1957e+06	521369	944490	940949	111364	505413	152817	169976	74.5	30.3	77.5	1.22	0.527
Q1LWH1	Ribosomal protein S16 OS=Danio rerio OX=7955 GN=rps16 PE=1 SV=1	2	1.36674e+06	989260	637940	2.4116e+06	2.64668e+06	778159	2.56107e+06	4.04205e+06	4.02408e+06	3.16921e+06	3.95415e+06	2.73603e+06	2.24938e+06	4.47749e+06	4.96362e+06	2.74137e+06	2.53758e+06	3.60049e+06	3.6486e+06	3.07939e+06	29.5	28.8	16.2	1.36	0.283
Q1LWN2	Vitellogenin 1 OS=Danio rerio OX=7955 GN=vtg1 PE=1 SV=1	40	5.98364e+07	1.6376e+07	77330843	4.59986e+07	8.87353e+07	3.58348e+07	8.62164e+07	9.34735e+07	9.7305e+07	9.08644e+07	1.38815e+08	1.90071e+08	2.01332e+08	1.40201e+08	1.62853e+08	1.25543e+08	9.39956e+07	8.8259e+07	9.22256e+07	1.00008e+08	18.9	13.2	5.22	-1.24	0.221
Q1LX65	Si:ch211-216l23.2 OS=Danio rerio OX=7955 GN=si:ch211-216l23.2 PE=4 SV=1	1	0	0	0	0	0	0	0	0	0	0	1.08063e+06	518442	746439	307298	619751	793801	109503	396206	233261	237224	36.2	43	48.1	-1.36	0.397
Q1LYD7	AMP deaminase OS=Danio rerio OX=7955 GN=ampd3b PE=1 SV=1	10	7.49163e+06	1.24736e+07	3939615	1.74566e+07	7.88143e+06	4.6763e+06	1.74369e+07	1.79381e+07	2.0461e+07	1.94847e+07	1.66652e+07	2.09843e+07	1.77568e+07	2.32377e+07	1.74361e+07	2.38888e+07	1.93715e+07	1.65108e+07	1.95977e+07	1.94668e+07	12.2	16.5	7.94	1.17	0.3
Q1MTC4	Vitellogenin 2 OS=Danio rerio OX=7955 GN=vtg2 PE=1 SV=1	1	0	0	0	0	0	0	629344	535622	0	761401	554003	1.00148e+06	511335	587883	438597	395270	623573	477110	849435	739822	39.4	21.3	23.7	-1.45	0.251
Q3B732	High mobility group nucleosomal-binding domain 2 OS=Danio rerio OX=7955 GN=hmgn2 PE=1 SV=1	1	329588	0	0	547274	0	270771	0	710507	706290	841274	700930	801154	1.21748e+06	829676	700632	833100	816897	632890	640389	817431	30.2	9.59	14.3	-1.15	0.569
Q3B7R0	Cytochrome c-1 OS=Danio rerio OX=7955 GN=cyc1 PE=1 SV=1	1	0	0	0	0	0	0	735141	779007	0	0	415367	599633	287296	361243	433735	350117	728400	693907	804898	428497	36.2	11.9	24.7	-1.14	0.724
Q498Z9	Dyskeratosis congenita 1, dyskerin OS=Danio rerio OX=7955 GN=dkc1 PE=2 SV=1	1	0	0	0	0	0	0	0	0	0	0	280710	515378	655689	454461	806115	406220	221435	174937	145602	121947	39.2	39.3	25.8	1.15	0.673
Q4KME6	GRB10-interacting GYF protein 2 OS=Danio rerio OX=7955 GN=gigyf2 PE=2 SV=2	3	0	2.2385e+07	0	0	3.47033e+06	2.17441e+06	822298	1.59763e+06	1.18001e+06	2.18911e+06	1.4988e+06	3.28244e+06	2.56621e+06	7.82921e+06	7.79876e+06	7.60494e+06	1.92191e+06	1.63679e+06	2.45092e+06	2.38228e+06	36.6	1.57	18.4	3.16	0.035
Q4KMI7	Actin, alpha 1b, skeletal muscle OS=Danio rerio OX=7955 GN=acta1b PE=2 SV=1	36	1.43715e+09	1.20444e+09	1.10854e+09	7.10984e+09	9.6971e+08	6.80761e+08	1.74958e+09	1.99881e+09	2.01189e+09	1.80885e+09	3.05818e+09	3.02783e+09	2.69656e+09	1.06171e+10	1.84769e+09	2.12869e+09	1.74497e+09	1.78136e+09	1.82906e+09	1.79413e+09	6.85	102	1.94	1.66	0.789
Q4V918	Proteasome subunit alpha type OS=Danio rerio OX=7955 GN=psma3 PE=1 SV=1	1	13627282	6.0379e+06	3173838	42500273	16631765	2.31709e+06	10573438	11015341	13870873	12230333	2.89809e+07	1.48157e+07	7.65407e+06	6.4431e+07	3.11915e+07	7.12916e+06	1.04765e+07	9.81201e+06	1.25766e+07	1.18837e+07	63.3	84	11.3	2	0.558
Q4V942	Zgc:56304 protein OS=Danio rerio OX=7955 GN=zgc:56304 PE=2 SV=1	3	0	0	0	0	0	0	0	0	1.11333e+06	0	733832	1.53823e+06	1.09823e+06	1.29978e+06	1.74549e+06	2.17466e+06	1.2757e+06	892854	1.50038e+06	1.04473e+06	35.9	25.1	22.6	1.55	0.161
Q4VBU0	2-oxoisovalerate dehydrogenase subunit alpha OS=Danio rerio OX=7955 GN=bckdha PE=1 SV=1	1	984058	1.91128e+06	0	0	0	0	0	0	1.06892e+06	0	2.09278e+06	4.68987e+06	4.25243e+06	361109	863535	679022	183102	608766	969186	132355	37.8	40.1	83.1	-5.8	0.00839
Q4VBV1	Cytochrome b-c1 complex subunit 7 OS=Danio rerio OX=7955 GN=uqcrb PE=1 SV=1	1	2057844	0	0	0	0	0	0	0	0	3016080	4.37638e+06	422759	588234	460055	576858	412116	198920	474708	131506	2.9306e+06	125	17.5	143	-3.72	0.405
Q4ZGK8	Cypher/ZASP splice variant 2 delta OS=Danio rerio OX=7955 GN=ldb3a PE=1 SV=1	1	0	0	0	0	0	0	0	0	0	0	608572	165453	203305	750435	677073	564616	137687	125184	240515	117256	75.4	14.1	37.1	2.04	0.157
Q502F2	Si:dkey-90m5.4 protein (Fragment) OS=Danio rerio OX=7955 GN=si:dkey-90m5.4 PE=2 SV=1	1	139045431	1.13047e+08	1.82813e+08	1.66953e+08	1.65467e+08	156557955	8.38155e+07	149524971	1.43922e+08	1.30758e+08	2.95706e+08	2.77392e+08	4.40875e+08	2.53104e+08	3.1032e+08	4.81693e+08	8.30469e+07	1.33191e+08	1.30493e+08	1.27052e+08	26.5	34.1	20	1.03	0.953
Q503M6	Si:dkey-11e23.4 protein (Fragment) OS=Danio rerio OX=7955 GN=acot20 PE=2 SV=1	1	143517	169687	87432	0	0	0	172829	248854	0	0	305214	416377	210852	650704	534351	345188	171244	221669	199040	147152	33.1	30.2	17.6	1.64	0.14
Q566R8	Heat shock protein, alpha-crystallin-related, b2 OS=Danio rerio OX=7955 GN=hspb2 PE=1 SV=1	5	2.99519e+07	1.41526e+07	15270608	9.24103e+06	8.72946e+06	8.32831e+06	24106000	1.98348e+07	23677552	2.22233e+07	6.36982e+07	4.32702e+07	3.68268e+07	1.52442e+07	1.75587e+07	2.64341e+07	2.4019e+07	1.81084e+07	2.18207e+07	2.15935e+07	29.3	29.9	11.4	-2.43	0.0186
Q566W6	Cold-inducible RNA-binding protein a OS=Danio rerio OX=7955 GN=cirbpa PE=1 SV=1	1	0	0	0	2.04917e+06	0	376527	1.49848e+06	2.14782e+06	1.97619e+06	3200392	533837	388382	459564	3.10657e+06	1.08835e+06	1.15849e+06	1.48474e+06	1.91319e+06	1.7918e+06	3.10969e+06	15.8	64.2	34.4	3.87	0.059
Q568M0	RAS-related 2 OS=Danio rerio OX=7955 GN=rras2 PE=1 SV=1	6	2.35305e+06	2.37448e+06	4.09857e+06	1.83194e+06	1671622	1.45126e+06	1.85655e+07	2.64766e+07	2.22729e+07	2.03991e+07	1.06009e+07	1.07633e+07	1.16568e+07	5.6306e+06	5.8878e+06	7.17741e+06	1.90749e+07	2.39565e+07	2.08672e+07	2.04509e+07	5.17	13.3	9.77	-1.77	0.00881
Q568U6	Desm protein OS=Danio rerio OX=7955 GN=desma PE=2 SV=1	21	1.81037e+07	2.70116e+07	3.08785e+07	1.75913e+08	3.10118e+07	1.4461e+07	5.72122e+07	7.14446e+07	7.31774e+07	7.28186e+07	5.03967e+07	8.67762e+07	8.4327e+07	2.28599e+08	9.26834e+07	5.17366e+07	5.81517e+07	6.57617e+07	6.75464e+07	7.84648e+07	27.5	74.5	12.4	1.68	0.5
Q58EM0	HERV-H LTR-associating 2a, tandem duplicate 1 OS=Danio rerio OX=7955 GN=hhla2a.1 PE=1 SV=1	1	0	0	0	0	0	0	0	0	0	0	611449	188842	471713	626700	851022	547492	461447	115246	224031	560481	50.8	23.3	60.5	1.59	0.253
Q5BJ11	Gnb2 protein OS=Danio rerio OX=7955 GN=gnb2 PE=1 SV=1	1	0	0	0	7.58066e+06	0	0	0	0	1.12881e+06	0	203592	710507	219873	318913	344590	411988	291555	506959	1.02349e+06	557252	76.2	13.4	51.8	-1.05	0.8
Q5BJ17	Elongation factor Tu OS=Danio rerio OX=7955 GN=tufm PE=1 SV=1	9	8.12673e+06	5.13624e+06	7.4402e+06	1.09374e+07	7.94441e+06	3.30987e+06	21732824	2.33683e+07	2.5036e+07	1.81916e+07	2.45834e+07	2.63039e+07	2.054e+07	1.65703e+07	1.71663e+07	1.8487e+07	2.30282e+07	2.12775e+07	2.35105e+07	2.26753e+07	12.4	5.63	4.24	-1.37	0.0367
Q5BJC6	NRAP protein (Fragment) OS=Danio rerio OX=7955 GN=nrap PE=2 SV=1	1	0	0	0	0	0	404216	0	0	0	0	748411	717596	277105	340533	464995	1.24368e+06	504038	330743	537529	150162	45.4	71.7	46.9	1.18	0.863
Q5BJJ2	Ribosomal protein L3 OS=Danio rerio OX=7955 GN=rpl3 PE=1 SV=1	1	0	0	0	0	1.0896e+06	0	0	0	1.51034e+06	0	648858	276059	754436	373504	2.04345e+06	352554	134798	149301	1.36942e+06	210811	44.9	105	129	1.65	0.749
Q5BKW5	Ribosomal protein L12 OS=Danio rerio OX=7955 GN=rpl12 PE=2 SV=1	2	2.86535e+06	1.46957e+06	1.93999e+06	1956464	7.16659e+06	3.31995e+06	1.63116e+06	2.65706e+06	1.00823e+06	1859627	6.0937e+06	7.53887e+06	4.67851e+06	1.47724e+07	1.34403e+07	1.02147e+07	2.18897e+06	2.3668e+06	2.10274e+06	1.80692e+06	23.4	18.3	11	2.1	0.0147
Q5CZQ1	Tyrosine 3-monooxygenase/tryptophan 5-monooxygenase activation protein, epsilon polypeptide 2 OS=Danio rerio OX=7955 GN=ywhae2 PE=1 SV=1	3	0	3.00783e+07	0	3.90994e+07	0	0	1.06158e+06	4.43319e+06	5.17285e+06	5.26438e+06	798672	5.01622e+06	1.92188e+06	1.85827e+06	1.22843e+06	1.77868e+06	4.68781e+06	4.6231e+06	4.69019e+06	5.11518e+06	84.7	21.1	4.73	-1.59	0.73
Q5EBY4	Receptor protein-tyrosine kinase OS=Danio rerio OX=7955 GN=erbb2 PE=2 SV=1	93	9.28012e+09	8.93002e+09	8.50409e+09	8.79686e+09	8.90869e+09	5.82417e+09	3.25447e+09	3.63535e+09	3.46793e+09	3.13234e+09	1.99371e+10	2.19607e+10	2.05212e+10	1.33738e+10	1.65645e+10	1.79673e+10	3.21215e+09	3.25277e+09	3.1526e+09	3.05912e+09	5.01	14.7	2.65	-1.3	0.0793
Q5PQZ7	Blood vessel epicardial substance OS=Danio rerio OX=7955 GN=bves PE=1 SV=1; Duplicate proteins: G9HVJ5|G9HVJ5_DANRE	8	2.14783e+07	2.20866e+07	2.3529e+07	2.68119e+07	14762879	12744085	77444918	7.26845e+07	7.37395e+07	7.13531e+07	4.85157e+07	6.16427e+07	5.92848e+07	4.48021e+07	3.25228e+07	4.3441e+07	7.68479e+07	6.81268e+07	7.14988e+07	6.99177e+07	12.4	16.7	5.25	-1.4	0.0584
Q5PRD0	14-3-3 protein beta/alpha-A OS=Danio rerio OX=7955 GN=ywhaba PE=2 SV=2	10	8.05073e+06	4.24052e+06	5.15059e+06	2.67024e+08	1.38404e+07	8.39008e+06	2.98854e+07	3.92112e+07	3.91856e+07	3.43879e+07	1.90422e+07	1.85451e+07	1.36547e+07	3.77266e+08	2.91169e+07	2.35034e+07	3.55693e+07	3.54166e+07	3.59503e+07	3.52955e+07	17.4	141	0.8	8.39	0.274
Q5PZ43	Xin actin-binding repeat-containing protein 1 OS=Danio rerio OX=7955 GN=xirp1 PE=1 SV=1	73	1.07211e+08	2.4341e+08	9.26168e+07	2.56303e+08	2.27965e+08	2.03558e+08	4.63674e+08	5.07935e+08	5.23866e+08	4.79816e+08	2.62231e+08	6.25508e+08	2.80043e+08	4.35982e+08	4.41287e+08	6.51919e+08	4.66714e+08	4.64835e+08	4.83753e+08	4.7126e+08	52.6	24.2	1.81	1.31	0.362
Q5RFW4	Protein-L-isoaspartate O-methyltransferase OS=Danio rerio OX=7955 GN=pcmt PE=1 SV=1	11	3.90872e+07	3.58936e+07	3.55705e+07	5.13113e+07	4.37556e+07	2.28656e+07	5.11555e+07	5.70816e+07	4.51737e+07	5.32884e+07	8.95405e+07	9.02183e+07	8.75922e+07	8.16492e+07	8.30787e+07	7.2606e+07	5.20937e+07	5.15138e+07	4.1764e+07	5.23257e+07	1.53	7.18	10.4	-1.13	0.0982
Q5RG12	Heat shock protein 90, alpha (cytosolic), class A member 1, tandem duplicate 2 OS=Danio rerio OX=7955 GN=hsp90aa1.2 PE=1 SV=1	5	2.58734e+06	1.94058e+06	2518054	6.94709e+07	6.35235e+06	4.3184e+06	4.181e+06	8052596	4.92759e+06	5.32748e+06	1.05805e+07	9.23925e+06	8.57576e+06	8.52752e+07	1.58032e+07	1.5102e+07	7.72613e+06	8.53912e+06	5.03234e+06	6.13007e+06	10.8	104	23	4.09	0.202
Q5RGI5	Protein phosphatase 6, regulatory subunit 2a OS=Danio rerio OX=7955 GN=ppp6r2a PE=1 SV=1	2	0	0	0	0	0	0	0	902254	790440	0	633341	1.54921e+06	960753	861289	1.20226e+06	975401	672595	993981	1.25395e+06	824550	44.3	17.1	26.6	-1.03	0.94
Q5RH26	ATP synthase subunit gamma OS=Danio rerio OX=7955 GN=atp5f1c PE=1 SV=1	8	8.90198e+06	1.23881e+08	9.3787e+06	6.1262e+06	1.01464e+07	5.50911e+06	1.93108e+07	2.11389e+07	2.07394e+07	2.07284e+07	1.98552e+07	3.35492e+07	2.47664e+07	1.02319e+07	1.99299e+07	1.78219e+07	2.31344e+07	2.2159e+07	1.91521e+07	2.03199e+07	26.6	31.9	8.45	-1.63	0.127
Q5RKM3	Stress-induced phosphoprotein 1 OS=Danio rerio OX=7955 GN=stip1 PE=1 SV=1	10	2.48217e+07	2.07342e+07	1.78658e+07	4.66924e+07	29418605	3.09897e+07	7.08939e+06	1.41982e+07	1.47546e+07	1.27011e+07	5.35104e+07	5.42166e+07	6.17276e+07	7.38624e+07	7.70607e+07	9.58599e+07	1.50073e+07	1.37274e+07	1.47104e+07	1.32428e+07	8.06	14.4	5.83	1.46	0.0254
Q5SP67	WD repeat-containing protein 26 OS=Danio rerio OX=7955 GN=wdr26 PE=1 SV=1	3	0	0	0	0	0	0	0	0	0	0	1.92211e+06	776545	837325	1.95285e+06	1.84735e+06	1.53907e+06	544969	718244	810439	830708	54.7	12.1	17.9	1.51	0.225
Q5TYR6	Zgc:101840 OS=Danio rerio OX=7955 GN=zgc:101840 PE=1 SV=1	4	4.01229e+06	5.246e+06	3.49784e+06	0	1.8922e+06	2.57152e+06	15719742	1.68338e+07	1.14365e+07	7.81288e+06	9.29679e+06	1.81827e+07	1.02817e+07	7.19267e+06	5.00046e+06	9.60583e+06	1.57989e+07	1.52787e+07	1.71203e+07	1.41937e+07	38.7	31.7	7.79	-1.73	0.129
Q5TZF0	Ras association (RalGDS/AF-6) domain family (N-terminal) member 8b OS=Danio rerio OX=7955 GN=rassf8b PE=4 SV=1	3	0	0	0	1.1511e+06	0	0	989187	1.73325e+06	2.11803e+06	836235	1.15085e+06	1.95368e+06	1.04953e+06	3.05453e+06	1.99354e+06	1.55704e+06	2.56286e+06	1.73634e+06	2.05094e+06	2.15452e+06	35.8	35	16	1.59	0.168
Q5TZG5	Ezrin OS=Danio rerio OX=7955 GN=ezrb PE=1 SV=1	2	0	0	0	29845752	0	0	1.30482e+06	4369586	3.33195e+06	1.60306e+06	1.25484e+06	1.77329e+06	547003	1.34627e+06	1.33242e+06	1.42409e+06	4.00238e+06	3.89225e+06	3.02105e+06	1.55762e+06	51.7	3.61	36.2	1.15	0.552
Q5U3E4	SGT1 homolog, MIS12 kinetochore complex assembly cochaperone OS=Danio rerio OX=7955 GN=sugt1 PE=1 SV=1	10	7.52112e+07	8.15224e+07	5.77085e+07	1.46139e+08	112983950	9.50139e+07	5.22239e+07	5.75713e+07	6.19974e+07	5.55262e+07	1.5995e+08	2.00038e+08	1.47314e+08	2.21549e+08	2.11892e+08	2.92336e+08	5.17449e+07	5.27326e+07	5.62127e+07	5.55601e+07	16.3	18.2	4	1.43	0.0594
Q5XFY2	Pdcd8 protein OS=Danio rerio OX=7955 GN=aifm1 PE=2 SV=1	18	4.33539e+07	2.42305e+07	2.85662e+07	2.49093e+07	2.41016e+07	8.18356e+06	3.46429e+07	2.86671e+07	2.73839e+07	2.8883e+07	7.46277e+07	7.35394e+07	7.2736e+07	4.40091e+07	3.48884e+07	3.03467e+07	3.15176e+07	2.8941e+07	2.71468e+07	3.0489e+07	1.29	19.1	6.46	-2.02	0.0217
Q5XJ03	Fdps protein (Fragment) OS=Danio rerio OX=7955 GN=fdps PE=2 SV=1	2	4.0735e+06	1.10468e+07	2.02628e+06	7.82521e+06	4.20322e+06	3.70584e+06	6.51261e+06	8.88177e+06	8.01573e+06	7.90396e+06	8.66305e+06	2.71065e+07	4.8866e+06	1.18631e+07	7.88278e+06	1.1402e+07	6.45288e+06	7.91152e+06	7.26781e+06	7.67995e+06	87.7	21	8.75	-1.31	0.966
Q5XJB2	Tnnc1 protein OS=Danio rerio OX=7955 GN=tnnc1a PE=2 SV=1	1	0	2.51145e+06	0	0	530002	0	0	0	995107	0	1.02419e+06	6.16256e+06	232352	667556	993973	904268	461864	519694	902257	154787	130	19.7	60.2	-2.89	0.784
Q5XJB9	[Protein ADP-ribosylarginine] hydrolase-like protein 1 OS=Danio rerio OX=7955 GN=adprhl1 PE=2 SV=1	6	1.03612e+06	2985935	3.79101e+06	3.92677e+06	3.81958e+06	1.72607e+06	14779352	7.83156e+06	6.46635e+06	5.38883e+06	3.55412e+06	8.95315e+06	1.10325e+07	8.87116e+06	1.12493e+07	6.79278e+06	1.57507e+07	7.90215e+06	6.90898e+06	6.25154e+06	49.2	24.9	48	1.14	0.606
Q5XJC3	Cardiac myosin light chain-1 OS=Danio rerio OX=7955 GN=cmlc1 PE=2 SV=1	1	0	0	0	0	0	0	0	1.51759e+06	0	0	249088	745317	303244	854648	665255	357184	432851	1.3518e+06	301052	220041	62.9	40.1	91	1.45	0.375
Q642H9	40S ribosomal protein S4, X isoform OS=Danio rerio OX=7955 GN=rps4x PE=2 SV=3	3	2.98822e+06	4.72999e+06	2.08147e+06	1.06579e+07	4.67799e+06	3.79072e+06	4.04864e+06	3.32209e+06	3.10152e+06	3.3694e+06	6.54385e+06	1.18476e+07	5.24301e+06	1.13447e+07	9.17277e+06	1.21384e+07	4.01151e+06	3.09183e+06	3.02574e+06	3.70512e+06	44.4	14.1	13.9	1.38	0.257
Q66HV5	Zgc:92481 OS=Danio rerio OX=7955 GN=zgc:92481 PE=2 SV=1	10	1.9173e+07	8.96807e+06	1.15863e+07	2.20869e+07	2.49273e+07	1.04666e+07	2.4143e+07	2.82504e+07	2.37684e+07	2.61023e+07	4.27329e+07	3.18728e+07	3.16545e+07	4.17787e+07	3.39014e+07	3.49597e+07	2.39216e+07	3.22438e+07	2.57558e+07	2.65345e+07	17.9	11.6	13.2	1.04	0.72
Q66HW2	EH-domain containing 1 OS=Danio rerio OX=7955 GN=ehd1b PE=1 SV=1	6	0	1.02158e+06	0	0	2.05911e+06	1.92839e+06	5.59321e+06	2.68898e+06	1.27048e+06	4.40065e+06	2.3191e+06	4.12813e+06	2.84575e+06	6.85366e+06	6.85532e+06	8.21513e+06	6.43946e+06	5.99181e+06	4.43942e+06	7.28129e+06	30	10.7	19.7	2.36	0.0242
Q66HY6	Nuclear receptor coactivator 5 OS=Danio rerio OX=7955 GN=ncoa5 PE=1 SV=1	2	0	0	0	0	0	0	0	0	0	302675	358998	964468	651514	1.29908e+06	1.33532e+06	958076	439859	253577	611439	429404	46	17.4	33.7	1.82	0.134
Q66I11	5'-nucleotidase, cytosolic II,-like 1 OS=Danio rerio OX=7955 GN=nt5c2l1 PE=1 SV=1	1	0	991884	0	0	0	0	0	0	1.04099e+06	0	307503	2.43387e+06	442371	585796	355200	782056	130175	133337	943861	107991	112	37.2	125	-1.85	0.754
Q66I42	Moesin a OS=Danio rerio OX=7955 GN=msna PE=1 SV=1	38	4.08225e+07	3.60694e+07	2.32367e+07	1.66867e+08	6.71349e+07	7.6957e+07	1.84486e+08	2.20872e+08	2.08778e+08	1.91023e+08	1.00485e+08	1.06331e+08	9.60504e+07	2.85289e+08	1.49163e+08	2.27677e+08	1.90896e+08	1.94081e+08	1.92286e+08	1.89433e+08	5.11	31	1.03	2.19	0.0558
Q66I73	Myosin light chain, phosphorylatable, fast skeletal muscle b OS=Danio rerio OX=7955 GN=mylpfb PE=1 SV=1	1	0	0	0	0	1501529	0	893935	0	0	0	198133	217746	1.17144e+06	536790	2.81599e+06	441429	885738	490961	352883	489402	105	106	41.5	2.39	0.355
Q66I77	Cytochrome c oxidase subunit 6A, mitochondrial OS=Danio rerio OX=7955 GN=cox6a2 PE=1 SV=1	1	0	2.06718e+06	3.33606e+06	0	949319	0	2.62808e+06	3.72292e+06	3.61615e+06	3.41696e+06	5.63691e+06	5.07241e+06	8.0453e+06	685015	1.78037e+06	776624	2.60398e+06	3.31623e+06	3.27874e+06	3.32012e+06	25.3	56.2	11.2	-5.78	0.0135
Q68EH2	Adenylate kinase isoenzyme 1 OS=Danio rerio OX=7955 GN=ak1 PE=1 SV=1	8	5.68457e+08	2205038551	4.4063e+08	3.14227e+09	1.14222e+09	7.13233e+08	1.45907e+09	1.8174e+09	1.95508e+09	1.84234e+09	1.20996e+09	5.41371e+09	1.06414e+09	4.76758e+09	2.14373e+09	2.19583e+09	1.44637e+09	1.61932e+09	1.77447e+09	1.7933e+09	96.4	49.4	9.73	1.18	0.553
Q6AZC1	Proteasome (Prosome, macropain) 26S subunit, ATPase, 5 OS=Danio rerio OX=7955 GN=psmc5 PE=1 SV=1	1	0	1.08574e+06	381816	489288	600690	325660	0	0	0	0	1.04987e+06	2.66417e+06	920792	741767	1.12654e+06	1.00198e+06	352409	383306	407842	132250	62.9	20.5	39.7	-1.61	0.383
Q6DC49	Tubulin alpha chain OS=Danio rerio OX=7955 GN=tuba8l3 PE=2 SV=1	1	6.80737e+06	4.03151e+06	3.60462e+06	8.28001e+06	4470072	4.12815e+06	1.97918e+06	1.93329e+06	2855816	1.60406e+06	1.44771e+07	9.89246e+06	8.69296e+06	1.25526e+07	8.38324e+06	1.27014e+07	1.96103e+06	1.7221e+06	2.58935e+06	1.5586e+06	27.7	21.9	23.1	1.02	0.914
Q6DC92	V-ral simian leukemia viral oncogene homolog Ba (ras-related) OS=Danio rerio OX=7955 GN=ralba PE=1 SV=1	3	0	635270	366395	5962576	855605	549128	4.36114e+06	4.52104e+06	6.36722e+06	5.13012e+06	1.49834e+06	2.37615e+06	1.70568e+06	4.38744e+06	2.70159e+06	4.18362e+06	4.48545e+06	4.48828e+06	6.0473e+06	5.42079e+06	24.7	24.5	15	2.02	0.0281
Q6DG71	Zgc:92453 OS=Danio rerio OX=7955 GN=uqcrc2a PE=2 SV=1	2	1.84321e+06	1.26791e+06	0	1.53981e+06	0	0	1.09988e+06	3.81694e+06	4.19502e+06	1.80187e+06	4.34574e+06	3.4198e+06	791808	2.65912e+06	1.48151e+06	878472	4.46378e+06	3.39998e+06	3.80359e+06	2.71221e+06	64.6	54.1	20.4	-1.7	0.554
Q6DGE9	Protein unc-45 homolog B OS=Danio rerio OX=7955 GN=unc45b PE=1 SV=2	46	4.53105e+08	5.26191e+08	3.98987e+08	8.40248e+08	5.80058e+08	4.64034e+08	2.93438e+08	3.6201e+08	4.13645e+08	4.8094e+08	9.47808e+08	1.2912e+09	9.68362e+08	1.31987e+09	1.08847e+09	1.44172e+09	3.2554e+08	3.26739e+08	3.72024e+08	4.75541e+08	18	14	18.8	1.2	0.227
Q6DGI6	Thioredoxin OS=Danio rerio OX=7955 GN=txn PE=1 SV=1	1	0	0	0	4981889	2.35653e+06	1.64671e+06	3.92058e+06	3.47865e+06	3410173	4.04121e+06	280029	871523	322433	7.55262e+06	4.41948e+06	5.06655e+06	3.88462e+06	3.09864e+06	3.09198e+06	3.92667e+06	67.2	29.1	13.4	11.6	0.00921
Q6DGJ6	Peroxiredoxin 2 OS=Danio rerio OX=7955 GN=prdx2 PE=1 SV=1	1	0	0	0	0	0	0	472405	384153	1.09017e+06	0	114455	316341	1.23706e+06	801228	930392	357579	468073	342188	988452	542328	108	43.1	48	1.25	0.492
Q6DGL0	Ribosomal protein L18 OS=Danio rerio OX=7955 GN=rpl18 PE=1 SV=1	1	0	281488	0	2.40492e+06	0	173232	773249	640568	607737	510032	219990	690710	454246	3.6459e+06	2.02948e+06	532997	766158	570592	551031	495577	51.7	75.2	19.8	4.55	0.127
Q6DGM9	NADH dehydrogenase (ubiquinone) 1 alpha subcomplex, 7 OS=Danio rerio OX=7955 GN=ndufa7 PE=1 SV=1	2	2.99967e+06	3.28883e+06	1.50187e+06	1.95135e+06	1.16e+06	1.14502e+06	1.1983e+06	3.0072e+06	3.37493e+06	3.40515e+06	6.37934e+06	8.07009e+06	5.63734e+06	3.5622e+06	2.59906e+06	3.52298e+06	2.85489e+06	2.67869e+06	3.06002e+06	3.30864e+06	18.6	16.9	9.12	-2.07	0.00781
Q6DGU9	Glutathione S-transferase kappa OS=Danio rerio OX=7955 GN=gstk1 PE=1 SV=1	2	2.04983e+06	1275111	1.56596e+06	1272557	589099	0	0	0	600481	0	4.35934e+06	7.10297e+06	3.77649e+06	2.27198e+06	1.47334e+06	1.39476e+06	329667	933873	876944	325591	35	28.3	54.2	-2.96	0.0132
Q6DGV5	RAB10, member RAS oncogene family OS=Danio rerio OX=7955 GN=rab10 PE=1 SV=1	1	426031	0	458063	8.39312e+06	0	0	717435	841613	908541	0	906034	519518	1.10467e+06	550586	864042	682264	710855	749674	823768	628799	35.3	22.5	11.1	-1.21	0.587
Q6DGX8	Proteasome subunit alpha type OS=Danio rerio OX=7955 GN=psma1 PE=1 SV=1	2	1.32632e+06	0	0	1.19251e+07	2.98279e+06	483585	1057082	1.42306e+06	1.61351e+06	1.06878e+06	3.17682e+06	1.0257e+06	497390	1.80786e+07	5.59398e+06	5.17335e+06	1.15826e+06	1.42738e+06	1.86739e+06	1.27367e+06	90.6	76.3	21.7	6.14	0.0504
Q6DH13	RNA-binding protein, mRNA-processing factor 2a OS=Danio rerio OX=7955 GN=rbpms2a PE=2 SV=1	1	0	0	0	0	0	0	0	0	0	0	1.04578e+06	222123	566550	515303	529217	499718	128975	106459	189847	417042	67.6	2.87	67.5	-1.19	0.982
Q6DHI9	Proteasome subunit beta type OS=Danio rerio OX=7955 GN=psmb2 PE=1 SV=1	1	600856	0	0	6.064e+06	1.01854e+06	0	0	491940	384193	0	1.27783e+06	249018	272918	9.19312e+06	1.91019e+06	2.68161e+06	459296	438200	348345	668294	97.9	87.1	28.3	7.66	0.0429
Q6DHP3	ADP-ribosylation factor 3a OS=Danio rerio OX=7955 GN=arf3a PE=2 SV=1	2	0	0	0	8508647	0	0	0	0	2.97956e+06	0	1.05905e+06	1.15167e+06	591790	3.92545e+06	1.2608e+06	1.12959e+06	1.05786e+06	758498	2.83817e+06	859684	32.1	74.9	71.2	2.25	0.226
Q6DHT4	Aldehyde dehydrogenase 6 family, member A1 OS=Danio rerio OX=7955 GN=aldh6a1 PE=1 SV=1	6	1.69345e+06	747420	6.62137e+06	0	0	0	2.17331e+06	2.46299e+06	1.78898e+06	5.13638e+06	4.51991e+06	3.86415e+06	5.44953e+06	2.84013e+06	3.15801e+06	4.09071e+06	3.57802e+06	3.94811e+06	3.90842e+06	5.72811e+06	17.3	19.3	22.7	-1.37	0.0973
Q6DI16	Calsequestrin OS=Danio rerio OX=7955 GN=casq2 PE=1 SV=1	1	0	1.25472e+06	0	2179348	0	0	1.8803e+06	0	994502	983986	404165	3.07883e+06	1.23035e+06	3.30392e+06	493623	520873	1.86306e+06	1.44957e+06	901708	956099	87.2	112	35.1	-1.09	0.83
Q6DRD1	ATP synthase oligomycin sensitivity conferral protein OS=Danio rerio OX=7955 GN=atp5po PE=1 SV=1	10	2.99194e+07	1.58075e+07	17772894	1.99371e+07	11245544	6.02506e+06	3.66485e+07	3.09166e+07	2.39161e+07	2.3592e+07	6.46927e+07	4.1591e+07	5.91876e+07	3.51736e+07	2.60816e+07	2.14238e+07	3.0979e+07	3.07028e+07	2.8985e+07	2.65803e+07	21.9	25.4	6.9	-2	0.0243
Q6GMK5	Small muscle protein, X-linked OS=Danio rerio OX=7955 GN=smpx PE=2 SV=1	2	0	0	0	0	0	0	0	0	0	0	706639	1.59476e+06	523938	641626	710161	1.0419e+06	387032	842526	394224	713337	60.8	26.8	39.3	-1.18	0.855
Q6GQL7	Fhla protein OS=Danio rerio OX=7955 GN=fhl1a PE=1 SV=1	2	7168829	8.97444e+06	2.94503e+06	23564389	9.98891e+06	5.27325e+06	17333187	18905076	1.80866e+07	1.63251e+07	1.52458e+07	2.20214e+07	1.41136e+07	3.5724e+07	1.87334e+07	1.62246e+07	1.71742e+07	1.68399e+07	1.6399e+07	1.58624e+07	25	45	3.43	1.38	0.391
Q6IQI6	60S ribosomal protein L11 OS=Danio rerio OX=7955 GN=rpl11 PE=1 SV=1	2	2.78106e+06	1.01976e+06	2102876	1.11442e+07	2.85531e+06	1.92703e+06	3.57974e+06	1.56295e+06	1.39538e+06	0	6.66072e+06	2.68716e+06	5.27036e+06	8.67857e+06	6.12261e+06	6.35936e+06	3.87801e+06	1.75228e+06	1.41236e+06	1.69666e+06	41.4	20	52.1	1.45	0.255
Q6IQL6	Zgc:56116 OS=Danio rerio OX=7955 GN=pdlim5b PE=2 SV=1	1	1.67914e+06	3557151	0	0	1.4186e+06	2.95476e+06	1.17205e+06	1.70679e+06	0	1.20954e+06	3.571e+06	8.72849e+06	7.81494e+06	1.10831e+07	2.66046e+06	9.09111e+06	1.1613e+06	1.52034e+06	1.47629e+06	1.17526e+06	41	57.8	14.4	1.14	0.955
Q6IQR3	Actin, alpha, cardiac muscle 1a OS=Danio rerio OX=7955 GN=actc1a PE=2 SV=1	3	103827996	5.92114e+07	72225288	4.91598e+07	6.65967e+07	3.09641e+07	5.89699e+07	66513355	6.46056e+07	57695295	2.21211e+08	1.45988e+08	2.00271e+08	7.48655e+07	1.25527e+08	9.59868e+07	5.85479e+07	5.92474e+07	5.91331e+07	5.6176e+07	20.5	25.8	2.46	-1.91	0.0293
Q6NSM6	Zgc:85963 OS=Danio rerio OX=7955 GN=epb41l3b PE=2 SV=1	11	4.62701e+06	2.01366e+06	0	1.94467e+06	1.28724e+06	1.2853e+06	1.09775e+07	1.30597e+07	8.84006e+06	8.57075e+06	1.31663e+07	9.29922e+06	1.15748e+07	7.87278e+06	8.35741e+06	9.54422e+06	1.38511e+07	1.54936e+07	1.28041e+07	1.28711e+07	17.1	10	9.12	-1.32	0.098
Q6NSP0	Zgc:85716 OS=Danio rerio OX=7955 GN=thrap3b PE=2 SV=1	1	0	0	0	0	0	0	0	0	0	0	377986	1.0481e+06	751642	850916	477297	551394	475972	122667	170955	496918	46.3	31.6	62.3	-1.16	0.801
Q6NUT4	Pabpn1 protein OS=Danio rerio OX=7955 GN=pabpn1 PE=1 SV=1	1	0	0	0	0	0	0	0	0	0	1.57199e+06	207175	193136	921781	632855	586378	429103	292116	186669	113532	1.52744e+06	94.6	19.4	126	1.25	0.442
Q6NUV0	Rab3 GTPase-activating protein catalytic subunit OS=Danio rerio OX=7955 GN=rab3gap1 PE=2 SV=2	1	0	0	0	0	0	0	515724	0	0	810847	579600	353045	128766	375444	909317	688248	510995	395786	494604	787866	63.7	40.8	30.7	1.86	0.244
Q6NV13	NudC nuclear distribution protein OS=Danio rerio OX=7955 GN=nudc PE=1 SV=1	2	760028	2.71595e+06	1400571	4.50804e+06	3.9241e+06	2.61964e+06	883400	1.27506e+06	1.83864e+06	563646	1.79248e+06	6.66435e+06	3.52104e+06	6.83425e+06	7.35931e+06	8.06003e+06	1.14377e+06	1.25952e+06	1.66708e+06	708798	61.9	8.29	33	1.86	0.183
Q6NVI6	Chaperonin-containing TCP1, subunit 5 (epsilon) OS=Danio rerio OX=7955 GN=cct5 PE=1 SV=1	3	0	569508	0	668290	541371	1.29927e+06	1.95869e+06	2.3646e+06	2.48742e+06	1.44592e+06	1.97953e+06	3.45011e+06	1.02972e+06	2.2629e+06	1.96021e+06	4.78686e+06	2.26303e+06	2.61574e+06	2.67918e+06	2.76026e+06	56.6	51.7	8.5	1.39	0.457
Q6NW90	Tubulin beta chain OS=Danio rerio OX=7955 GN=tubb5 PE=1 SV=1	4	3.21901e+06	2399539	4431970	87716803	5447501	1.52733e+06	3.93908e+06	6.79281e+06	3.13447e+06	0	7.93153e+06	1.66339e+07	1.14382e+07	2.28553e+07	1.14621e+07	6.35096e+06	6.40285e+06	6.21641e+06	5.01496e+06	5.52025e+06	36.5	62.3	11.1	1.13	0.944
Q6NWC1	Vdac1 protein OS=Danio rerio OX=7955 GN=vdac1 PE=1 SV=1	1	2.84866e+06	1.43184e+06	0	1.73836e+07	2184078	437150	1.49137e+06	3576608	2.77266e+06	2.59083e+06	6.0582e+06	3.51343e+06	6.08787e+06	2.63538e+07	4.09605e+06	1.34501e+06	1.4777e+06	3.18589e+06	2.51395e+06	2.5174e+06	28.3	129	29.1	2.03	0.97
Q6NWC3	Ribosomal protein S2 OS=Danio rerio OX=7955 GN=rps2 PE=1 SV=1	2	1.81579e+06	2.82658e+06	658435	1.52784e+07	2.31473e+06	2.32428e+06	3863384	3.44871e+06	5.85461e+06	2.57317e+06	3.8616e+06	6.93583e+06	4.36206e+06	2.31623e+07	4.34108e+06	7.15129e+06	3.82796e+06	3.07197e+06	5.30833e+06	2.50025e+06	32.6	87.9	33.1	2.29	0.348
Q6NWI0	Tubulin alpha chain OS=Danio rerio OX=7955 GN=tuba8l PE=2 SV=1	3	8.26783e+06	4.32385e+06	12224945	2.30935e+07	1.50757e+07	8.62323e+06	9206526	1.61772e+07	1.3838e+07	1.16711e+07	1.77758e+07	1.08056e+07	2.99135e+07	3.50101e+07	2.82732e+07	2.65317e+07	9.27335e+06	1.441e+07	1.31654e+07	1.18987e+07	49.6	15	18	1.54	0.222
Q6NWI7	Tmed10 protein OS=Danio rerio OX=7955 GN=tmed10 PE=1 SV=1	1	0	0	0	4990673	0	0	1.0084e+06	675233	1515542	1.08731e+06	116886	437670	155141	324512	441799	643498	999150	601469	1.37413e+06	1.05649e+06	74.1	34.3	31.5	1.99	0.168
Q6NWL9	Pdlim7 protein OS=Danio rerio OX=7955 GN=pdlim7 PE=2 SV=1	3	3.18452e+06	0	0	1.30255e+06	0	1.3072e+06	3.54169e+06	0	4.25219e+06	4.52921e+06	7.31803e+06	987201	1.15046e+06	2.9497e+06	2.27531e+06	4.39713e+06	3.65452e+06	4.22945e+06	4.18654e+06	4.79048e+06	114	33.8	11	1.02	0.585
Q6NX98	ST13, Hsp70-interacting protein OS=Danio rerio OX=7955 GN=st13 PE=1 SV=1	5	1.15347e+07	7.90924e+06	7399459	8.28297e+06	1.30704e+07	1.17534e+07	2.65973e+06	4.1706e+06	2.52736e+06	2862342	2.50402e+07	2.52811e+07	1.80757e+07	2.95838e+07	2.45125e+07	3.61624e+07	3.29038e+06	4.02617e+06	3.37543e+06	3.80206e+06	17.9	19.4	9.65	1.32	0.154
Q6NY25	WD repeat domain 1 OS=Danio rerio OX=7955 GN=wdr1 PE=2 SV=1	1	0	0	0	6860361	0	0	0	0	1744562	0	361967	230367	623521	351786	677422	611983	274668	372298	1.58178e+06	131716	49.4	31.5	113	1.35	0.39
Q6NYE1	Fibrinogen beta chain OS=Danio rerio OX=7955 GN=fgb PE=1 SV=1	6	1.05339e+06	0	717150	1.86463e+06	1.20749e+06	1.06361e+06	3.88555e+06	7.49815e+06	3.59418e+06	6.34072e+06	4.36388e+06	3.09224e+06	4.157e+06	5.54151e+06	5.51684e+06	6.33104e+06	7.55477e+06	7.64704e+06	6.58083e+06	7.43336e+06	17.6	7.99	6.71	1.5	0.0459
Q6NYQ7	Nicotinamide nucleotide transhydrogenase OS=Danio rerio OX=7955 GN=nnt PE=1 SV=1	10	2.18719e+07	2.1496e+07	1.83486e+07	1.18255e+07	1.21013e+07	4.85084e+06	3.32121e+07	3.77857e+07	4.11155e+07	3.85214e+07	4.75102e+07	5.36438e+07	4.5574e+07	2.49471e+07	2.51854e+07	2.09945e+07	3.34163e+07	3.3882e+07	3.79045e+07	3.82339e+07	8.61	9.93	7.15	-2.06	0.000825
Q6NYR4	Heat shock cognate 71 kDa protein OS=Danio rerio OX=7955 GN=hspa8 PE=1 SV=1	30	2.31063e+08	1.49131e+08	2.02262e+08	4.56559e+08	2.48275e+08	1.9386e+08	2.02523e+08	2.0333e+08	1.96236e+08	1.92058e+08	4.82606e+08	3.87345e+08	4.92084e+08	7.10511e+08	4.69391e+08	6.05653e+08	2.02047e+08	1.83722e+08	1.82937e+08	1.90915e+08	12.8	20.3	4.66	1.31	0.154
Q6NYU8	Heterogeneous nuclear ribonucleoprotein A/B OS=Danio rerio OX=7955 GN=hnrnpaba PE=1 SV=1	2	0	2575622	0	0	0	0	1.31929e+06	1.08874e+06	945012	1.5487e+06	793275	7.37349e+06	488895	1.05413e+06	958954	1.38698e+06	1.53736e+06	1.29898e+06	1.02987e+06	2.45823e+06	135	19.8	39.2	-2.55	0.804
Q6NYV3	H1 histone family, member 0 OS=Danio rerio OX=7955 GN=h1f0 PE=1 SV=1	1	8620593	8929080	7692959	8516188	5.10221e+06	3.74133e+06	5.99651e+06	6.29496e+06	6.44586e+06	8344410	1.83333e+07	2.191e+07	1.85524e+07	1.29107e+07	9.56875e+06	1.15112e+07	5.94152e+06	5.60729e+06	5.84442e+06	8.10792e+06	10.2	14.8	18.3	-1.73	0.00912
Q6NZV4	Cysteine and glycine-rich protein 1 OS=Danio rerio OX=7955 GN=csrp1a PE=1 SV=1	2	1.71772e+06	253164	1.26272e+06	3.28702e+06	487463	781044	1.80448e+06	1.9227e+06	1.60628e+06	811321	3.65304e+06	2.61155e+06	3.0452e+06	4.98318e+06	2.06663e+06	2.40309e+06	1.78793e+06	1.71266e+06	1.4564e+06	1.67864e+06	16.9	50.6	8.59	1.02	0.867
Q6P0D4	VAMP (Vesicle-associated membrane protein)-associated protein A OS=Danio rerio OX=7955 GN=vapa PE=2 SV=1	3	1.51017e+07	1.44389e+07	1.22549e+07	1.96176e+07	1.70513e+07	1.09916e+07	7.33605e+06	13847955	1.2501e+07	9.84551e+06	3.21165e+07	3.54299e+07	2.95541e+07	2.97405e+07	3.19783e+07	3.38187e+07	7.26877e+06	1.23352e+07	1.13346e+07	9.56648e+06	9.1	6.41	21.9	-1.02	0.83
Q6P0I2	Proteasome subunit alpha type OS=Danio rerio OX=7955 GN=psma8 PE=1 SV=1	2	0	0	0	20193049	3.69918e+06	0	1.14642e+06	2.11084e+06	2.3301e+06	0	1.30161e+06	335912	837086	3.0613e+07	6.93749e+06	1.56655e+07	1.26762e+06	2.41579e+06	2.3869e+06	3.1124e+06	58.6	67.5	33.2	21.5	0.00668
Q6P0T0	NADH dehydrogenase (Ubiquinone) Fe-S protein 8, (NADH-coenzyme Q reductase) OS=Danio rerio OX=7955 GN=ndufs8a PE=1 SV=1	1	0	0	0	0	0	0	0	640221	0	0	1.00208e+06	173735	296202	501420	501294	492474	505719	570282	200031	103882	91.1	1.03	66	1.02	0.63
Q6P0V6	60S ribosomal protein L8 OS=Danio rerio OX=7955 GN=rpl8 PE=2 SV=3	1	0	1.27596e+06	0	3.37338e+06	434402	0	0	0	1.62434e+06	0	312159	3.13094e+06	357689	5.11409e+06	814684	1.99159e+06	317899	222709	1.47278e+06	456973	127	84.2	93.6	2.08	0.32
Q6P0W3	Tropomyosin 3 OS=Danio rerio OX=7955 GN=tpm3 PE=1 SV=1	1	2.35858e+06	0	0	0	0	0	0	0	0	0	5.01596e+06	951841	1.19923e+06	584488	407352	854951	140732	364672	248284	248632	95.4	36.6	36.5	-3.88	0.154
Q6P124	GTPase-activating protein (SH3 domain)-binding protein 1 OS=Danio rerio OX=7955 GN=g3bp1 PE=1 SV=1	9	464501	1.0822e+06	0	142622	406601	379055	1.22207e+07	8.37919e+06	1.10307e+07	5.454e+06	5.33659e+06	5.53084e+06	4.7538e+06	4.8333e+06	5.84177e+06	5.16922e+06	1.42213e+07	7.93607e+06	1.09503e+07	8.74409e+06	7.77	9.72	26.9	1.01	0.864
Q6P267	UBX domain protein 4 OS=Danio rerio OX=7955 GN=ubxn4 PE=2 SV=1	1	1.24738e+06	2.69061e+06	807908	4.19268e+06	3.02533e+06	2.42976e+06	2.46932e+06	2.58846e+06	2.05033e+06	3.6518e+06	2.65278e+06	6.60218e+06	1.94836e+06	6.35617e+06	5.67375e+06	7.47584e+06	2.44668e+06	2.30569e+06	1.85902e+06	3.5483e+06	67.2	14	28.2	1.74	0.196
Q6P271	Sodium/potassium-transporting ATPase subunit alpha OS=Danio rerio OX=7955 GN=atp1a3a PE=1 SV=1	1	0	6319145	2.59571e+06	16985080	8188695	13545801	4.7241e+07	13157373	7881734	10876172	1.29229e+07	1.55058e+07	6.25984e+06	2.57496e+07	1.53572e+07	4.16774e+07	4.68078e+07	1.172e+07	7.14632e+06	1.05679e+07	41.3	48	97.6	2.39	0.0984
Q6P2B0	VAMP (vesicle-associated membrane protein)-associated protein B and C OS=Danio rerio OX=7955 GN=vapb PE=1 SV=1	5	7.44219e+06	8.51e+06	5.09897e+06	3.51397e+06	4.32655e+06	4.36101e+06	3.75504e+06	3.66363e+06	4.12285e+06	3.42429e+06	1.59783e+07	2.08817e+07	1.28767e+07	8.23509e+06	8.48775e+06	1.34178e+07	4.85397e+06	3.83594e+06	4.07376e+06	4.74355e+06	24.3	29.1	11.4	-1.65	0.0749
Q6P3J2	Rho GDP dissociation inhibitor (GDI) alpha OS=Danio rerio OX=7955 GN=arhgdia PE=1 SV=1	1	0	0	0	0	0	659367	1.40347e+06	822920	0	0	1.00363e+06	123952	198697	734321	451524	2.02872e+06	1.3906e+06	733024	861932	961294	110	78.5	28.9	2.42	0.235
Q6P3J5	Eukaryotic translation elongation factor 2 OS=Danio rerio OX=7955 GN=eef2b PE=1 SV=1	10	1.18217e+07	2.8088e+06	3.44697e+06	74601148	1.20961e+07	5.34809e+06	9.11558e+06	1.73286e+07	1.48221e+07	1.15363e+07	2.68184e+07	1.3912e+07	1.32813e+07	1.01619e+08	2.47992e+07	2.47011e+07	1.03024e+07	1.64439e+07	1.45777e+07	1.24469e+07	42.4	88.1	19.8	2.8	0.209
Q6P3L3	Heat shock protein 5 OS=Danio rerio OX=7955 GN=hspa5 PE=1 SV=1	28	2.1534e+08	2.2333e+08	2.29943e+08	5.25983e+08	248334255	1.8577e+08	1.04316e+08	1.23349e+08	1.26055e+08	1.13322e+08	4.58726e+08	5.62655e+08	5.55689e+08	7.97399e+08	4.66814e+08	5.71571e+08	1.10301e+08	1.13633e+08	1.16306e+08	1.18405e+08	11.1	27.6	3.05	1.16	0.5
Q6P3L9	Glutamate dehydrogenase 1 OS=Danio rerio OX=7955 GN=glud1b PE=1 SV=1	3	478853	3.9121e+06	5.36393e+06	9029217	2.3818e+06	3.22937e+06	2401108	7.16349e+06	5.61938e+06	8.29284e+06	1.09799e+07	1.25726e+07	1.29357e+07	1.47492e+07	7.50235e+06	9.93605e+06	9.01191e+06	7.25324e+06	5.09505e+06	8.05781e+06	8.55	34.4	22.7	-1.13	0.5
Q6P5L8	Hydroxysteroid dehydrogenase-like protein 2 OS=Danio rerio OX=7955 GN=hsdl2 PE=2 SV=1	4	8.67128e+06	7.7796e+06	5.53434e+06	3.72531e+06	5.34976e+06	2.45921e+06	9.20599e+06	1.3888e+07	1.40846e+07	11783405	1.84411e+07	2.16109e+07	2.33162e+07	8.87528e+06	1.05849e+07	8.00289e+06	1.19691e+07	1.23709e+07	1.27704e+07	1.14494e+07	11.7	14.3	4.65	-2.31	0.0016
Q6P5M9	Tubulin beta chain OS=Danio rerio OX=7955 GN=tubb4b PE=2 SV=1	28	1.61207e+08	1.34548e+08	1.62141e+08	7.98288e+08	2.31705e+08	1.19428e+08	1.90783e+08	2.25749e+08	2.29043e+08	2.01715e+08	3.46596e+08	3.41321e+08	4.06809e+08	1.13024e+09	4.44628e+08	3.73461e+08	1.99893e+08	2.15971e+08	2.08778e+08	1.99642e+08	9.97	64.3	3.81	1.78	0.317
Q6P603	Annexin OS=Danio rerio OX=7955 GN=anxa2a PE=1 SV=1	28	3.88895e+07	5.25953e+07	3.35828e+07	3.67568e+08	2.78901e+08	2.94633e+08	2.86717e+08	3.09573e+08	2.9123e+08	2.76057e+08	9.08314e+07	1.41674e+08	9.388e+07	5.80395e+08	5.29346e+08	8.98417e+08	2.85914e+08	2.79681e+08	2.68601e+08	2.71922e+08	26.2	29.9	2.82	6.15	0.00121
Q6P696	Lactoylglutathione lyase OS=Danio rerio OX=7955 GN=glo1 PE=1 SV=1	4	0	761816	0	4645494	2.90578e+06	6.36019e+06	1.13509e+07	1.25215e+07	1.26673e+07	6.86526e+06	1.41732e+06	3.17741e+06	1.82885e+06	1.06529e+07	6.45171e+06	1.95688e+07	1.12468e+07	1.11536e+07	1.14854e+07	1.09555e+07	43	54.8	1.96	5.71	0.0156
Q6P6E7	Ribosomal protein S20 OS=Danio rerio OX=7955 GN=rps20 PE=2 SV=1	3	8.73801e+06	8.04359e+06	7.16789e+06	2.87065e+07	12558575	8.11143e+06	12510523	1.56414e+07	1.68899e+07	1.61113e+07	1.8583e+07	1.97373e+07	1.72862e+07	4.35195e+07	2.35525e+07	2.4957e+07	1.23958e+07	1.39327e+07	1.53139e+07	1.56547e+07	6.62	36.3	10.4	1.66	0.136
Q6P7E4	PDZ and LIM domain protein 7 OS=Danio rerio OX=7955 GN=pdlim7 PE=2 SV=1	1	0	0	0	677245	0	0	0	0	0	0	379515	202019	158076	1.02671e+06	440874	556186	252907	318008	423793	139013	47.6	46	42.1	2.74	0.0495
Q6P980	Superoxide dismutase OS=Danio rerio OX=7955 GN=sod2 PE=1 SV=1	1	0	788870	0	0	0	0	0	1.31369e+06	0	1.27396e+06	362556	1.93572e+06	191061	871049	431855	375857	1.03773e+06	1.17018e+06	1.08669e+06	1.23785e+06	116	48.5	7.83	-1.48	0.983
Q6PBI0	Succinate--CoA ligase [ADP-forming] subunit beta, mitochondrial OS=Danio rerio OX=7955 GN=sucla2 PE=1 SV=1	3	8.82058e+06	1.22654e+07	13009086	3.17082e+06	7.41102e+06	2.73457e+06	7846676	11273694	1.23859e+07	1.25193e+07	1.88931e+07	3.03666e+07	3.15693e+07	5.12753e+06	1.38987e+07	9.24761e+06	8.01449e+06	1.03681e+07	1.14813e+07	1.21645e+07	26	46.6	17.3	-2.86	0.0416
Q6PBJ8	Peptidylprolyl isomerase OS=Danio rerio OX=7955 GN=fkbp1aa PE=1 SV=1	1	1.1877e+06	0	0	0	1.55294e+06	1.34766e+06	3.195e+06	2623694	2530820	1.64209e+06	2.52586e+06	564238	451404	1.07111e+06	2.91241e+06	4.14645e+06	3.1657e+06	2.33708e+06	2.29468e+06	1.59555e+06	98.8	57.1	27.4	2.3	0.218
Q6PBT1	40S ribosomal protein S27 OS=Danio rerio OX=7955 GN=rps27.2 PE=1 SV=1	2	0	9.2816e+06	895040	26038493	2.79725e+06	939129	7.96314e+06	0	0	2.42623e+07	3.08104e+06	3.84069e+06	2.39857e+06	3.94747e+07	5.246e+06	1.40523e+07	8.10311e+06	1.49354e+07	1.2764e+07	2.36856e+07	23.2	90.7	43.9	6.31	0.111
Q6PBW3	Ribosomal protein S14 OS=Danio rerio OX=7955 GN=rps14 PE=1 SV=1	2	4.87029e+06	2472894	4.98075e+06	1.4019e+07	5.40816e+06	3.17932e+06	6.19219e+06	9.06433e+06	9.09177e+06	5.82482e+06	1.03576e+07	1.13824e+07	1.20116e+07	2.1253e+07	1.01425e+07	9.78206e+06	6.1354e+06	8.07413e+06	8.24345e+06	5.65974e+06	7.42	47.5	18.8	1.22	0.654
Q6PBY1	40S ribosomal protein S3a OS=Danio rerio OX=7955 GN=rps3a PE=2 SV=3	3	0	0	0	7.41786e+06	0	0	2.27468e+06	218243	1.7395e+06	1.86382e+06	1.19247e+06	1.69856e+06	1.6013e+06	1.83891e+06	1.87441e+06	1.50535e+06	2.51083e+06	2.35526e+06	1.5772e+06	2.13311e+06	17.9	11.7	19.1	1.16	0.305
Q6PC12	Enolase 1, (Alpha) OS=Danio rerio OX=7955 GN=eno1a PE=1 SV=1	10	1.30027e+08	8.21371e+07	7.05138e+07	1.64726e+08	8.29847e+07	4.10202e+07	8.75224e+07	1.07107e+08	1.13284e+08	1.00546e+08	2.77989e+08	2.04703e+08	1.71957e+08	1.65563e+08	1.58488e+08	1.35527e+08	9.36519e+07	9.94012e+07	1.04234e+08	9.93674e+07	24.9	10.3	4.36	-1.42	0.124
Q6PC14	60S ribosomal protein L23 OS=Danio rerio OX=7955 GN=rpl23 PE=2 SV=1	2	6.75103e+06	1.16424e+07	2.77108e+06	1.2811e+07	5.96971e+06	7.68706e+06	5930895	8.05247e+06	7.25462e+06	6.85074e+06	1.43573e+07	2.85679e+07	7.67063e+06	1.94217e+07	1.11957e+07	2.61571e+07	6.98851e+06	7.17281e+06	6.57772e+06	6.65659e+06	63.3	39.6	4.09	1.12	0.689
Q6PC53	Peptidyl-prolyl cis-trans isomerase OS=Danio rerio OX=7955 GN=ppiab PE=1 SV=1	1	2.23742e+06	0	0	4.62998e+06	1.9398e+06	0	1.3844e+06	3.07946e+06	2.91004e+06	1.67491e+06	4.75828e+06	135367	1.15417e+06	7.01912e+06	3.63793e+06	9.4121e+06	1.37171e+06	2.74305e+06	2.63851e+06	1.62744e+06	120	43.4	33.3	3.32	0.198
Q6PCR4	RAN-binding protein 3b OS=Danio rerio OX=7955 GN=ranbp3b PE=1 SV=1	2	38232336	2.67368e+07	39687536	44486328	35100900	21991176	4.5954e+07	3.75293e+07	3.53414e+07	31162200	8.17969e+07	6.57571e+07	9.60366e+07	6.78428e+07	6.6378e+07	6.85051e+07	4.55326e+07	3.37336e+07	3.22073e+07	3.03813e+07	18.7	1.61	19.3	-1.2	0.257
Q6PE25	Elongation factor 1-gamma OS=Danio rerio OX=7955 GN=eef1g PE=2 SV=1	2	0	0	0	0	0	0	483318	0	526219	0	670032	1.78487e+06	524270	1.02307e+06	814925	866040	595361	696459	603498	648490	69.4	12	7.33	-1.1	0.912
Q6PGX4	Heat shock cognate 70 OS=Danio rerio OX=7955 GN=hsc70 PE=1 SV=1	10	6.71404e+07	3.90379e+07	6.75059e+07	5.59767e+07	3.51305e+07	2.13504e+07	3.66419e+07	3.90013e+07	4.23164e+07	3.82575e+07	1.45334e+08	1.30286e+08	1.62798e+08	8.63388e+07	6.75449e+07	7.10207e+07	3.70992e+07	3.48686e+07	3.8511e+07	3.76106e+07	11.1	13.3	4.19	-1.95	0.00268
Q6PHD6	Integrin-linked kinase OS=Danio rerio OX=7955 GN=ilk PE=1 SV=1	1	0	0	0	1.14029e+06	530278	320599	1.63983e+06	1.78185e+06	2.2343e+06	1.44168e+06	283593	317421	174777	1.72869e+06	994490	986409	1.62479e+06	1.5872e+06	2.02583e+06	1.40082e+06	28.8	34.5	15.8	4.78	0.00392
Q6PHE3	Si:rp71-61h23.4 protein (Fragment) OS=Danio rerio OX=7955 GN=plin3 PE=2 SV=1	12	1.76191e+07	1.22732e+07	9.4324e+06	3.97442e+07	2.68088e+07	6.56077e+06	31701577	3.45315e+07	3.07077e+07	3.64545e+07	3.92481e+07	3.7294e+07	5.33987e+07	6.43878e+07	5.85004e+07	2.71171e+07	2.77293e+07	3.19179e+07	2.89881e+07	3.57711e+07	20.3	40.1	11.5	1.15	0.785
Q6PI52	Calmodulin OS=Danio rerio OX=7955 GN=calm1a PE=2 SV=3; Duplicate proteins: B2GQW3|B2GQW3_DANRE	5	0	838537	643692	2.58775e+08	1.60269e+06	631695	1.74483e+07	1.8624e+07	20035448	1.84951e+07	2.80262e+06	3.15944e+06	4.09592e+06	3.10319e+08	1.29641e+07	2.71283e+07	1.78183e+07	1.70489e+07	1.98013e+07	1.94239e+07	19.9	144	7.05	34.8	0.107
Q6PUR8	Eukaryotic translation initiation factor 4B OS=Danio rerio OX=7955 GN=eif4bb PE=2 SV=1	3	0	599927	0	0	0	0	0	0	0	0	1.49e+06	2.53392e+06	2.84059e+06	2.08788e+06	2.13794e+06	1.38575e+06	930525	1.21904e+06	1.11213e+06	1.1084e+06	30.9	22.5	10.9	-1.22	0.498
Q6Q7X9	Kelch-like protein 31 OS=Danio rerio OX=7955 GN=klhl31 PE=2 SV=1; Duplicate proteins: A2RRU8|A2RRU8_DANRE	2	0	0	0	0	0	0	0	0	0	0	1.09743e+06	845453	333772	757239	872526	1.00012e+06	496823	914588	798238	460935	51.3	13.9	33.5	1.16	0.56
Q6TEP3	Glutamine synthetase OS=Danio rerio OX=7955 GN=GLUL PE=2 SV=1	4	1.52741e+06	1.68291e+06	0	7.82565e+07	626293	0	2.68506e+06	2781392	3.39752e+06	3.08889e+06	4.58607e+06	4.88608e+06	2.14328e+06	5.99413e+07	2.86197e+06	9.37552e+06	3.65507e+06	3.7123e+06	3.83804e+06	3.79598e+06	38.9	130	2.19	6.21	0.316
Q6TGV6	Proteasome subunit alpha type OS=Danio rerio OX=7955 GN=psma5 PE=1 SV=1	1	0	0	0	9821294	1.76463e+06	0	973728	1.59525e+06	0	1.79065e+06	380297	446049	1.28746e+06	1.48892e+07	3.3094e+06	1.7817e+07	964798	1.42098e+06	1.78602e+06	1.7399e+06	71.8	63.9	25.6	17	0.0166
Q6TH14	Enolase 1, (Alpha) OS=Danio rerio OX=7955 GN=eno3 PE=1 SV=1	14	8.82386e+07	6.9195e+07	8.85854e+07	1.84107e+08	7.50111e+07	3.6796e+07	7.57416e+07	9.66013e+07	8.86917e+07	8.54234e+07	1.94682e+08	1.79474e+08	2.1402e+08	2.95286e+08	1.41094e+08	1.26741e+08	7.90002e+07	8.66933e+07	8.33204e+07	8.37777e+07	8.83	49.8	3.81	-1.04	0.708
Q6TH32	Cofilin 1 OS=Danio rerio OX=7955 GN=cfl1 PE=1 SV=1	6	1.69769e+07	2.44508e+07	2.21283e+07	9.26082e+07	5.34492e+07	3.14719e+07	3.47339e+07	3.95466e+07	3.82007e+07	3.74959e+07	3.67954e+07	6.13806e+07	5.49938e+07	2.0838e+08	1.00613e+08	1.01021e+08	3.50451e+07	3.5666e+07	3.57295e+07	3.7152e+07	25	45.4	2.48	2.68	0.0383
Q6TNR9	Phosphoglycerate mutase OS=Danio rerio OX=7955 GN=pgam1l PE=2 SV=1	7	3.36175e+06	1.63645e+06	445535	1.76591e+08	1.63114e+06	3.63517e+06	3.97399e+07	4.48472e+07	4.16797e+07	3.87588e+07	8.2946e+06	7.2096e+06	5.06455e+06	1.37265e+08	1.77207e+07	1.36928e+07	3.97519e+07	4.13544e+07	3.80204e+07	3.94258e+07	24	125	3.45	8.2	0.16
Q6TNU6	Dihydrolipoyl dehydrogenase OS=Danio rerio OX=7955 GN=dldh PE=1 SV=1	1	1.73728e+06	4.51467e+06	3.26169e+06	5574706	3.50044e+06	2.46203e+06	7.08034e+06	7.10469e+06	3.17527e+06	6.41211e+06	3.69465e+06	1.1078e+07	7.86593e+06	8.45134e+06	6.56478e+06	7.57512e+06	7.01541e+06	6.32856e+06	2.879e+06	6.23039e+06	49.1	12.5	33.1	-1	0.812
Q6VN46	Myoglobin OS=Danio rerio OX=7955 GN=mb PE=2 SV=3	11	1.09893e+08	3.33766e+07	1.96115e+07	6.35496e+07	2.56875e+07	9.58207e+06	1.09573e+08	1.34479e+08	1.55402e+08	1.3398e+08	2.09321e+08	8.33181e+07	5.40047e+07	9.41382e+07	5.03133e+07	3.18035e+07	1.09198e+08	1.2039e+08	1.41366e+08	1.30643e+08	71.4	54.5	11	-1.97	0.299
Q6ZM12	Hemoglobin, beta adult 2 OS=Danio rerio OX=7955 GN=hbba2 PE=1 SV=1	3	1.25985e+07	1.75178e+06	5411289	4.70148e+06	6.3912e+06	1.72708e+06	1.87949e+07	1.79985e+07	17943417	12374229	2.67929e+07	1.35226e+07	1.34736e+07	1.03998e+07	1.19862e+07	9.58471e+06	1.86226e+07	1.60323e+07	1.62692e+07	1.20235e+07	42.8	11.5	17.4	-1.68	0.169
Q6ZM17	Novel protein similar to zebrafish hemoglobin alpha-adult 1 (Hbaa1) OS=Danio rerio OX=7955 GN=si:ch211-5k11.8 PE=1 SV=1	6	6.85403e+07	23297871	3.16892e+07	5.1482e+07	10775766	1.32174e+07	44315802	48087264	5.5381e+07	5.29983e+07	1.45763e+08	1.12441e+08	7.66058e+07	7.8794e+07	4.28642e+07	4.16871e+07	4.82913e+07	4.28342e+07	5.02136e+07	5.14962e+07	31	38.7	7.92	-2.05	0.0601
Q71N41	Guanidinoacetate N-methyltransferase OS=Danio rerio OX=7955 GN=gamt PE=2 SV=2; Duplicate proteins: A8E5I0|A8E5I0_DANRE	1	843933	896057	0	0	0	0	3422250	3.44752e+06	2976249	2838024	1.79478e+06	2.19873e+06	1.58094e+06	368540	675274	906213	3.39087e+06	3.07091e+06	2.69855e+06	2.75759e+06	16.9	41.5	10.7	-2.86	0.0401
Q7SYE2	Actinin, alpha 4 OS=Danio rerio OX=7955 GN=actn4 PE=2 SV=1	1	0	0	0	1.8241e+06	0	0	194700	0	212375	224047	856156	227466	561584	2.76536e+06	846527	971180	192914	256732	192559	217697	57.4	70.3	14.1	2.79	0.135
Q7SYK7	Aspartate aminotransferase OS=Danio rerio OX=7955 GN=got2a PE=1 SV=1	2	2.56916e+07	4.50607e+07	6.64347e+07	2.64046e+06	2.82571e+07	1.28462e+07	2.58242e+07	30824454	6.70622e+07	4.00469e+07	5.4638e+07	1.10569e+08	1.60215e+08	4.00298e+06	5.35695e+07	4.04809e+07	2.55874e+07	2.74572e+07	6.08049e+07	3.8912e+07	48.7	78.6	42.4	-3.32	0.187
Q7SYM1	Forkhead box K1 OS=Danio rerio OX=7955 GN=foxk1 PE=1 SV=1	19	3.14418e+06	4.52698e+06	583230	7.58353e+06	1.50944e+06	1.94128e+06	1.41553e+08	1.50611e+08	1.76915e+08	169411412	1.35867e+07	1.76379e+07	1.22549e+07	1.83326e+07	1.232e+07	1.74563e+07	1.42745e+08	1.47304e+08	1.61533e+08	1.65547e+08	19.3	20.3	7.11	1.11	0.586
Q7SZP2	UPF0690 protein C1orf52 homolog OS=Danio rerio OX=7955 GN=zgc:65873 PE=1 SV=1	4	0	0	0	0	979841	580298	1.05203e+07	1.32654e+07	1.12276e+07	1.04926e+07	3.15748e+06	1.8174e+06	2.12865e+06	3.40694e+06	3.75998e+06	3.71072e+06	1.04238e+07	1.18163e+07	1.018e+07	1.01953e+07	29.6	5.27	7.35	1.53	0.105
Q7SZV9	Novel alpha-globin OS=Danio rerio OX=7955 GN=hbaa1 PE=3 SV=1	1	0	0	0	0	0	0	0	7.55459e+06	0	0	268835	542950	180848	351231	748990	407821	392036	115267	140127	326669	57.1	42.8	56.2	1.52	0.309
Q7T1J9	Ribosomal protein S10 OS=Danio rerio OX=7955 GN=rps10 PE=1 SV=1	1	0	0	0	3.34756e+06	0	0	463327	637395	563683	591820	928148	1.07968e+06	146816	5.07495e+06	922744	966993	459078	567765	511088	575047	69.7	103	10.3	3.23	0.252
Q7T334	Malate dehydrogenase OS=Danio rerio OX=7955 GN=mdh2 PE=1 SV=1	4	8.10739e+06	4.40838e+06	4.40704e+06	30252555	1.29103e+07	6.49749e+06	1.25618e+07	1.03265e+07	1.11709e+07	1.0486e+07	1.77414e+07	1.13357e+07	1.12672e+07	3.92108e+07	2.50781e+07	2.12004e+07	1.25719e+07	9.63213e+06	1.05053e+07	1.04602e+07	27.6	33.3	11.6	2.12	0.0375
Q7T356	14-3-3 protein beta/alpha-B OS=Danio rerio OX=7955 GN=ywhabb PE=2 SV=1	3	759864	0	0	2.22205e+07	0	225919	1.7104e+06	4.50152e+06	2.90843e+06	2.40848e+06	2.29892e+06	1.73801e+06	2.5561e+06	2.47607e+07	5.7899e+06	1.75689e+06	1.97513e+06	4.00977e+06	2.89542e+06	3.0931e+06	19	114	27.9	4.9	0.296
Q7T368	Pyruvate dehydrogenase (Lipoamide) beta OS=Danio rerio OX=7955 GN=pdhb PE=1 SV=1	4	1.74895e+06	3.19679e+06	2.95549e+06	2.20339e+06	925581	365696	2.79411e+06	4.9156e+06	1.52015e+06	5.70016e+06	5.38037e+06	8.70852e+06	8.79747e+06	4.71211e+06	3.0522e+06	2.43664e+06	5.68393e+06	4.58942e+06	5.61568e+06	5.82683e+06	25.5	34.6	10.4	-2.24	0.0327
Q7T370	Protein CDV3 homolog OS=Danio rerio OX=7955 GN=cdv3 PE=2 SV=1	4	0	1.21878e+06	0	1.27522e+06	1.74972e+06	2.30368e+06	8.26391e+06	1.04638e+07	9.36412e+06	8.50304e+06	2.08611e+06	4.79113e+06	2.6563e+06	3.36234e+06	5.23682e+06	8.03594e+06	8.65926e+06	9.994e+06	8.89477e+06	8.93562e+06	44.9	42.4	6.52	1.74	0.189
Q7T3B1	Proteasome (Prosome, macropain) 26S subunit, ATPase 2 OS=Danio rerio OX=7955 GN=psmc2 PE=1 SV=1	1	0	0	0	2.36276e+06	0	0	0	768105	0	0	118709	646528	129831	3.58198e+06	438541	348341	264898	684196	117081	122921	101	126	89.8	4.88	0.227
Q7T3G4	Phosphoglycerate mutase OS=Danio rerio OX=7955 GN=pgam2 PE=1 SV=1	3	1.58649e+06	1.14135e+06	1.52917e+06	38980	922065	590843	5.12856e+06	5.12959e+06	5.28394e+06	1.57669e+06	3.68815e+06	5.64123e+06	4.55189e+06	1.23938e+06	2.15424e+06	2.9079e+06	5.08153e+06	4.56923e+06	4.79092e+06	2.62611e+06	21.2	39.8	26.1	-2.2	0.0601
Q7ZTH6	Hydroxyacyl-Coenzyme A dehydrogenase/3-ketoacyl-Coenzyme A thiolase/enoyl-Coenzyme A hydratase (Trifunctional protein), beta subunit OS=Danio rerio OX=7955 GN=hadhb PE=2 SV=1	4	1.81469e+07	1.47562e+07	2.23998e+07	2.16657e+07	1.40052e+07	8.8594e+06	2.462e+07	2.28212e+07	25537640	2.45879e+07	3.85928e+07	4.12229e+07	5.40197e+07	3.75331e+07	2.62655e+07	2.7655e+07	2.43942e+07	2.25601e+07	2.31548e+07	2.67035e+07	18.5	20.2	7.58	-1.46	0.0655
Q7ZTT4	Chloride intracellular channel 4 OS=Danio rerio OX=7955 GN=clic4 PE=1 SV=1	2	3.80193e+06	1.64088e+06	1.34245e+06	5138985	3.58553e+06	1.30124e+06	5.02387e+06	5.81472e+06	8.13708e+06	5731097	8.08549e+06	4.37233e+06	3.99642e+06	7.79078e+06	6.72436e+06	6.82549e+06	4.9778e+06	5.17951e+06	7.37784e+06	5.56867e+06	41.2	8.28	19	1.3	0.295
Q7ZU25	Sodium/potassium-transporting ATPase subunit alpha OS=Danio rerio OX=7955 GN=atp1a1a.1 PE=2 SV=1	11	7.76688e+06	4240225	1.77198e+07	7258118	3.49684e+06	1.052e+06	1.45289e+07	16628349	2.04741e+07	2.35548e+07	2.03751e+07	1.45805e+07	4.81048e+07	1.55401e+07	1.05511e+07	1.20151e+07	1.81933e+07	1.93713e+07	1.94532e+07	2.48271e+07	64.7	20.2	14.5	-2.18	0.197
Q7ZU59	Histone H2A (Fragment) OS=Danio rerio OX=7955 GN=h2afvb PE=2 SV=1	3	7.01562e+06	5.39376e+06	4.52605e+06	285363633	8.09406e+06	6.17763e+06	2.79153e+07	29950368	29223049	27981323	1.54401e+07	1.43433e+07	1.45628e+07	4.32615e+08	1.51797e+07	1.90072e+07	2.76593e+07	2.71346e+07	2.67323e+07	2.7361e+07	3.93	154	1.44	10.5	0.377
Q7ZU62	Zgc:66168 protein (Fragment) OS=Danio rerio OX=7955 GN=rps27a PE=2 SV=1	10	1.32007e+08	1.09358e+08	1.09497e+08	4.79615e+08	1.74886e+08	7.67387e+07	3.65038e+08	3.61545e+08	1.99175e+08	1.7972e+08	2.81681e+08	2.88953e+08	2.65913e+08	7.12444e+08	3.29749e+08	2.38352e+08	3.67763e+08	3.25385e+08	1.81046e+08	1.78829e+08	4.22	58.9	37.1	1.53	0.432
Q7ZU85	LIM domain containing preferred translocation partner in lipoma OS=Danio rerio OX=7955 GN=lpp PE=2 SV=1	7	0	0	1.7119e+06	2.66306e+07	0	1.55422e+06	2663436	3.38591e+08	1.52888e+07	7.19656e+06	3.08842e+06	2.44111e+06	7.23232e+06	7.38802e+06	5.57374e+06	7.35422e+06	3.63575e+07	3.02515e+08	4.30275e+07	1.09395e+07	61.1	15.3	139	1.59	0.22
Q7ZU99	Transitional endoplasmic reticulum ATPase OS=Danio rerio OX=7955 GN=vcp PE=1 SV=1	3	0	0	0	20711427	0	0	1.25579e+06	1.17463e+06	659598	984603	824668	450738	1.56071e+06	5.1633e+06	2.20823e+06	1.61427e+06	1.71674e+06	1.82166e+06	2.99674e+06	2.35871e+06	59.7	63.5	26.4	3.17	0.0822
Q7ZUI4	Thioredoxin OS=Danio rerio OX=7955 GN=zgc:56493 PE=1 SV=1	3	1.5896e+06	0	1.81429e+06	1.54148e+07	3.99608e+06	1.31512e+06	3.02647e+06	3.50062e+06	3.17747e+06	3.81127e+06	3.93258e+06	1.53727e+06	5.71381e+06	1.19264e+07	8.13512e+06	1.17223e+07	3.38034e+06	3.35233e+06	3.34053e+06	4.07512e+06	56.2	20.1	10.2	2.84	0.0849
Q7ZUL7	RNA binding protein OS=Danio rerio OX=7955 GN=rbpms2b PE=1 SV=1	6	2894912	844681	719841	0	2272080	1.08237e+06	6.67539e+06	9.0223e+06	8.52701e+06	9.35786e+06	8.88436e+06	4.97965e+06	8.46781e+06	1.39684e+07	6.95777e+06	6.29588e+06	7.84316e+06	8.4534e+06	8.71156e+06	9.28791e+06	28.8	46.9	6.99	1.22	0.63
Q7ZUN7	Ckmt1 protein OS=Danio rerio OX=7955 GN=ckmt1 PE=1 SV=1	1	609699	0	0	1846492	0	0	0	0	0	0	1.29664e+06	732254	331947	2.79931e+06	426457	468050	452244	162620	374613	204956	61.6	110	46	1.56	0.808
Q7ZUP5	DnaJ (Hsp40) homolog, subfamily A, member 2 OS=Danio rerio OX=7955 GN=dnaja2 PE=2 SV=1	2	8.14144e+06	8.87453e+06	7.88286e+06	16006273	6.97903e+06	8.506e+06	2.48947e+06	6.40358e+06	8.23486e+06	5828571	1.73143e+07	2.17762e+07	1.90104e+07	2.42657e+07	1.30886e+07	2.6171e+07	6.43101e+06	5.70404e+06	7.46649e+06	5.66338e+06	11.6	33.4	13.4	1.09	0.847
Q7ZUP6	Isocitrate dehydrogenase [NADP] OS=Danio rerio OX=7955 GN=idh2 PE=2 SV=1	17	1.17701e+08	1.37898e+08	1.07281e+08	1.41797e+08	1.04981e+08	6.13694e+07	1.28322e+08	1.46862e+08	1.49731e+08	1.31842e+08	2.53029e+08	3.50694e+08	2.58719e+08	2.4348e+08	1.97723e+08	1.89865e+08	1.28234e+08	1.37621e+08	1.35906e+08	1.28588e+08	19.1	13.8	3.68	-1.37	0.0842
Q7ZUS9	Electron-transfer-flavoprotein, alpha polypeptide OS=Danio rerio OX=7955 GN=etfa PE=2 SV=1	7	5.97411e+06	7.95225e+06	9.54352e+06	1.41908e+07	9.10407e+06	4487392	1.30234e+07	1.48129e+07	1.56868e+07	1.08067e+07	1.64053e+07	2.05471e+07	2.42961e+07	2.29073e+07	2.1972e+07	2.19618e+07	1.3079e+07	1.35047e+07	1.45945e+07	1.35079e+07	19.3	2.44	4.74	1.09	0.473
Q7ZUY0	SET nuclear proto-oncogene a OS=Danio rerio OX=7955 GN=seta PE=1 SV=1	2	723855	0	0	8738439	0	0	1.93826e+06	3.2522e+06	1.44909e+06	2.56995e+06	1.70114e+06	600599	748594	1.01854e+06	1.22941e+06	1.22926e+06	3.13017e+06	2.89693e+06	2.48062e+06	2.49711e+06	58.7	10.5	11.5	1.14	0.541
Q7ZV96	60S ribosomal protein L10 OS=Danio rerio OX=7955 GN=rpl10 PE=2 SV=1	1	1.2128e+06	488056	1.54077e+06	9.40013e+06	2304874	1.58281e+06	2.35532e+06	3.07815e+06	3.12194e+06	2.17142e+06	2.57925e+06	1.19758e+06	3.71574e+06	1.42507e+07	4.32259e+06	4.86996e+06	2.33373e+06	2.74189e+06	2.83064e+06	2.10988e+06	50.5	71.4	13.6	3.13	0.0988
Q7ZVD3	LIM-domain binding factor 3a OS=Danio rerio OX=7955 GN=ldb3a PE=2 SV=1	3	2.98715e+06	3.38074e+06	2.36916e+06	1.13592e+06	1.01743e+06	566003	2.45975e+07	2.7704e+07	26657034	2.75106e+07	6.4854e+06	8.89382e+06	1.84123e+07	2.58994e+06	3.30642e+06	3.25404e+06	2.45829e+07	2.48933e+07	2.47865e+07	2.70741e+07	56	13.1	4.61	-3.69	0.0515
Q7ZVF9	Actin, cytoplasmic 2 OS=Danio rerio OX=7955 GN=actbb PE=2 SV=2; Duplicate proteins: A8WG05|A8WG05_DANRE	10	8.20243e+07	6.39802e+07	6.85819e+07	2.58319e+09	1.24777e+08	6.25276e+07	3.14614e+08	3.35209e+08	3.41034e+08	2.68832e+08	1.75274e+08	1.47886e+08	1.68915e+08	3.82481e+09	2.88929e+08	1.93101e+08	3.11729e+08	2.9859e+08	3.09213e+08	2.61213e+08	8.74	144	7.91	8.75	0.3
Q7ZVG7	Fgg protein OS=Danio rerio OX=7955 GN=fgg PE=1 SV=1	7	497260	2.86517e+06	4.21257e+06	8.59391e+06	4.1193e+06	3.51065e+06	9.93457e+06	1.04865e+07	8.69356e+06	1.44917e+07	5.7343e+06	9.37018e+06	1.31166e+07	1.76937e+07	1.55157e+07	1.62419e+07	1.19335e+07	1.3468e+07	1.35643e+07	1.45539e+07	39.2	6.73	8.09	1.75	0.121
Q7ZVI6	Tubulin alpha chain OS=Danio rerio OX=7955 GN=tuba8l4 PE=2 SV=1	1	7.48992e+06	6.71489e+06	5.10687e+06	81840434	1.45889e+07	9479629	8.39766e+06	1.0896e+07	9765602	8.94015e+06	1.59287e+07	1.64769e+07	1.23158e+07	1.24071e+08	2.73603e+07	2.91667e+07	8.32065e+06	9.70572e+06	8.85441e+06	8.68677e+06	15.2	91.9	6.6	4.04	0.143
Q7ZVJ4	L-lactate dehydrogenase OS=Danio rerio OX=7955 GN=ldha PE=2 SV=1	2	2.53234e+06	2.20313e+06	1.97907e+06	5.03222e+06	7.66463e+06	1.78057e+06	3.51491e+06	6.35608e+06	7.8602e+06	7.88384e+06	6.17424e+06	5.62556e+06	4.94342e+06	7.62892e+06	1.43744e+07	1.70017e+07	5.87941e+06	5.66173e+06	7.12679e+06	7.6604e+06	11	37.2	14.7	2.33	0.0741
Q7ZVT1	Increased sodium tolerance 1 homolog (yeast) OS=Danio rerio OX=7955 GN=ist1 PE=1 SV=1	4	1.41006e+06	945543	0	3.57998e+06	1.43299e+06	1.35734e+06	4.98101e+06	5.329e+06	6279516	7.99902e+06	5.20879e+06	3.33923e+06	2.10658e+06	6.77241e+06	4.43251e+06	5.62773e+06	5.0551e+06	5.07687e+06	5.80572e+06	7.95136e+06	44	20.9	22.9	1.58	0.181
Q7ZVT2	Pyruvate kinase OS=Danio rerio OX=7955 GN=pkma PE=1 SV=1	11	3.34891e+07	4.13975e+07	1.97585e+07	213946478	2.8284e+07	1.07574e+07	3.80943e+07	5.41353e+07	4.90314e+07	5.16559e+07	7.93321e+07	1.08342e+08	4.85482e+07	3.25416e+08	5.42426e+07	4.44483e+07	4.42114e+07	4.89416e+07	4.64487e+07	5.01919e+07	38	113	5.61	1.8	0.779
Q7ZW18	Calcium-transporting ATPase OS=Danio rerio OX=7955 GN=atp2a2a PE=2 SV=1	34	6.35051e+08	6.27197e+08	6.41916e+08	7.06421e+08	7.28506e+08	3.56539e+08	3.37788e+08	3.22368e+08	3.39094e+08	3.18025e+08	1.35887e+09	1.54144e+09	1.54863e+09	1.11741e+09	1.3515e+09	1.09851e+09	3.2453e+08	2.89789e+08	3.2106e+08	3.11778e+08	7.25	11.9	5.01	-1.25	0.0569
Q7ZZ04	Enoyl CoA hydratase, short chain, 1, mitochondrial OS=Danio rerio OX=7955 GN=echs1 PE=1 SV=1	4	3.75058e+06	9.00937e+06	4.05976e+06	2.63147e+06	2.4365e+06	651742	6.60372e+06	6.93262e+06	7.58544e+06	6.60125e+06	2.04722e+07	2.30406e+07	1.17541e+07	5.05746e+06	6.0918e+06	4.03029e+06	7.37057e+06	6.85067e+06	7.18736e+06	6.8123e+06	32.1	20.4	3.82	-3.64	0.0112
Q801M3	Myosin light chain 2 Mlc2a OS=Danio rerio OX=7955 GN=myl7 PE=1 SV=1	16	1.50891e+08	1.97804e+08	109154534	2.47633e+08	1.94682e+08	1.70503e+08	2.86061e+08	3.30367e+08	3.25108e+08	3.02944e+08	3.23591e+08	4.86009e+08	2.73598e+08	3.78666e+08	3.67911e+08	5.28317e+08	2.84346e+08	2.95031e+08	2.96558e+08	2.95213e+08	30.8	21.1	1.94	1.18	0.441
Q802V0	LIM domain-binding 3b OS=Danio rerio OX=7955 GN=ldb3b PE=1 SV=1	15	597868	6.65457e+06	4.87821e+06	1.98297e+07	11565208	5.36449e+06	7.03068e+07	8.08682e+07	7.78177e+07	7.31272e+07	9.90456e+06	1.03449e+07	1.70687e+07	3.53104e+07	3.43272e+07	2.30282e+07	7.15199e+07	7.47352e+07	7.60682e+07	7.37309e+07	32.3	22.1	2.59	2.48	0.0159
Q803B0	Heat shock 60 protein 1 OS=Danio rerio OX=7955 GN=hspd1 PE=1 SV=1	3	0	0	483876	1.55623e+07	1.9354e+06	7.98178e+06	1.38864e+06	3.50836e+06	1.6682e+07	1.32997e+07	1.15405e+06	957274	1.44563e+06	1.84907e+07	4.02188e+06	3.46736e+07	3.96808e+06	6.92012e+06	1.75472e+07	1.29228e+07	20.7	80.4	58.8	16.1	0.0569
Q803D7	Protein disulfide-isomerase (Fragment) OS=Danio rerio OX=7955 GN=pdia3 PE=2 SV=1	1	0	1.3982e+06	0	45443723	0	0	7.56009e+06	8.86984e+06	1.69563e+07	1.6964e+07	565612	3.43089e+06	156338	465824	386470	532124	7.49076e+06	7.90089e+06	1.53742e+07	1.64833e+07	129	15.8	40.4	-3	0.71
Q803F6	40S ribosomal protein SA OS=Danio rerio OX=7955 GN=rpsa PE=2 SV=1; Duplicate proteins: B2GNT1|B2GNT1_DANRE	2	1.16778e+06	0	0	3.78729e+06	2.07079e+06	1.55201e+06	2938130	4.38559e+06	3.57648e+06	3.40006e+06	2.70457e+06	461313	1.44984e+06	5.74158e+06	4.33278e+06	5.73799e+06	2.91119e+06	3.9065e+06	3.24277e+06	3.3037e+06	73.1	15.4	12.4	3.43	0.102
Q803F7	RNA binding motif protein 4.2 OS=Danio rerio OX=7955 GN=rbm4.2 PE=2 SV=1	2	0	2.72984e+06	0	2.95734e+06	0	0	875346	0	1.52255e+06	858776	877181	6.69844e+06	419492	4.79179e+06	1.26842e+06	1.45779e+06	1.15428e+06	1.52248e+06	1.68112e+06	1.08983e+06	131	79.1	21	-1.06	0.678
Q803M1	Tropomyosin 3 OS=Danio rerio OX=7955 GN=tpm3 PE=1 SV=1	10	1.10282e+07	4.22318e+06	4.15421e+06	340487018	1.05364e+07	3.00731e+06	2.70932e+07	3.14285e+07	3.18012e+07	3.03043e+07	2.96073e+07	1.86545e+07	1.3791e+07	4.12353e+08	2.72122e+07	3.64448e+07	2.75702e+07	2.88117e+07	2.98968e+07	3.22337e+07	39.2	138	6.68	7.67	0.26
Q803M8	Tryosine 3-monooxygenase/tryptophan 5-monooxygenase activation protein, zeta polypeptide OS=Danio rerio OX=7955 GN=ywhaqb PE=1 SV=1	1	316906	0	422596	24716967	0	0	0	984284	480186	0	673958	1.26903e+06	1.01914e+06	679574	415494	759121	440222	876759	435381	737445	30.3	29.1	35.5	-1.6	0.149
Q803Q7	Fructose-bisphosphate aldolase OS=Danio rerio OX=7955 GN=aldoaa PE=1 SV=1	15	2.58309e+07	1.58878e+07	1.68885e+07	1.56181e+08	1.23779e+07	19070043	3.99961e+07	5.75948e+07	4.66191e+07	5.06566e+07	5.6285e+07	5.4678e+07	4.45394e+07	2.55622e+08	3.36496e+07	5.49413e+07	4.55451e+07	5.22625e+07	4.99066e+07	5.27409e+07	12.3	107	6.56	2.21	0.57
Q803X5	AMP deaminase OS=Danio rerio OX=7955 GN=ampd3b PE=2 SV=1	1	0	0	0	0	0	0	0	1.59584e+06	1.54932e+06	1.95812e+06	132034	423060	450029	551283	794989	371550	1.47372e+06	1.42151e+06	1.40476e+06	1.90262e+06	52.6	37.1	15.3	1.71	0.262
Q804G9	Annexin OS=Danio rerio OX=7955 GN=anxa2a PE=2 SV=1	2	422312	0	0	4.18242e+06	2.17063e+06	7.4132e+06	1.55123e+07	18292030	12058030	1.36224e+07	1.2171e+06	1.00583e+06	1.53411e+06	6.72531e+06	4.99224e+06	1.57642e+07	1.537e+07	1.62938e+07	1.09329e+07	1.32363e+07	21.2	63.1	17.1	7.31	0.0221
Q8AX99	Actinin alpha 3b OS=Danio rerio OX=7955 GN=actn3b PE=1 SV=1	8	975942	0	3.12025e+06	1.71146e+08	1.78777e+06	827372	1.37346e+07	9.74254e+06	1.89723e+07	9.68563e+06	6.49771e+06	6.2665e+06	1.04282e+07	1.38749e+08	1.03903e+07	1.7265e+07	1.52855e+07	1.58653e+07	1.81305e+07	1.53332e+07	30.3	130	8.32	7.17	0.226
Q8JG73	Casein kinase 1, alpha 1 OS=Danio rerio OX=7955 GN=csnk1a1 PE=1 SV=1	7	0	2.10144e+06	0	6840590	4.50519e+06	773963	1.48666e+07	2.20268e+07	1.77127e+07	1.49259e+07	3.01712e+06	8.38545e+06	3.58808e+06	1.48033e+07	1.15822e+07	5.18282e+06	1.61337e+07	1.96206e+07	1.69854e+07	1.56931e+07	59	46.5	10.3	2.11	0.164
Q8JGT0	Casein kinase 1, alpha 1 OS=Danio rerio OX=7955 GN=csnk1a1 PE=1 SV=1	1	0	0	0	0	0	0	1.97618e+06	1.96418e+06	2.26717e+06	1.80376e+06	709955	398316	326298	375263	758777	407980	1.95806e+06	1.74961e+06	2.05563e+06	1.75264e+06	42.6	41.4	8.14	1.07	0.823
Q8JH70	Fructose-bisphosphate aldolase C-B OS=Danio rerio OX=7955 GN=aldocb PE=2 SV=1; Duplicate proteins: B2GP30|B2GP30_DANRE	5	1.41626e+07	2.02163e+06	633287	6.93864e+07	7.11695e+06	1.84449e+06	20377157	9.86846e+06	1.30388e+07	9.47856e+06	8.75321e+06	8.45504e+06	4.58135e+06	1.00376e+08	1.41689e+07	6.55284e+06	1.07725e+07	9.2915e+06	1.20225e+07	1.06418e+07	32	129	10.5	5.56	0.305
Q8JHI0	Solute carrier family 25 (mitochondrial carrier; adenine nucleotide translocator), member 5 OS=Danio rerio OX=7955 GN=slc25a5 PE=1 SV=1	19	4.57393e+08	4.49334e+08	3.33857e+08	2.90599e+08	3.27051e+08	1.88115e+08	5.22027e+08	5.7147e+08	5.69578e+08	4.92565e+08	9.73913e+08	1.12312e+09	8.06717e+08	4.83103e+08	6.15446e+08	5.81518e+08	5.20339e+08	5.09724e+08	5.16969e+08	4.7944e+08	16.4	12.3	3.68	-1.73	0.0126
Q90474	Heat shock protein HSP 90-alpha 1 OS=Danio rerio OX=7955 GN=hsp90a.1 PE=1 SV=3	53	1.15587e+09	1.14747e+09	1011625735	1.6748e+09	1.41783e+09	1.18484e+09	4.77928e+08	5.58748e+08	5.53313e+08	5.31642e+08	2.46444e+09	2.92103e+09	2.43929e+09	2.54369e+09	2.66337e+09	3.64886e+09	4.79142e+08	5.03928e+08	5.08557e+08	5.23214e+08	10.4	20.5	3.64	1.13	0.437
Q90485	Hemoglobin subunit beta-2 OS=Danio rerio OX=7955 GN=ba2 PE=1 SV=3	1	2.96669e+06	4916924	2.14438e+06	8454633	3.83184e+06	1.8971e+06	14572985	12583612	10953364	9703331	6.3092e+06	1.20651e+07	5.17142e+06	1.28173e+07	7.18628e+06	5.83696e+06	1.44393e+07	1.1209e+07	9.93134e+06	9.42833e+06	47.1	43	20	1.1	0.78
Q90486	Hemoglobin subunit beta-1 OS=Danio rerio OX=7955 GN=ba1 PE=1 SV=3; Duplicate proteins: B3DG37|B3DG37_DANRE	10	203545196	1.02575e+08	9.60088e+07	321213015	7.86139e+07	4.75195e+07	3.21133e+08	3.68328e+08	3.33362e+08	3.84041e+08	4.32876e+08	2.52703e+08	2.36717e+08	4.80807e+08	1.48906e+08	1.48025e+08	3.18323e+08	3.28671e+08	3.02573e+08	3.73472e+08	35.4	74	9.2	-1.19	0.545
Q90X41	Novel protein similar to human splicing factor 3a, subunit 1, 120kD (SF3A1) OS=Danio rerio OX=7955 GN=sf3a1 PE=1 SV=1	3	4.73993e+06	523783	140513	1.77773e+06	4.11266e+06	211044	2.91159e+06	1.66821e+06	1.02476e+06	1.79151e+06	1.209e+06	1.62763e+06	948003	3.03216e+06	2.68412e+06	1.36849e+06	3.15997e+06	1.70777e+06	1.10382e+06	1.85225e+06	27.2	37.2	44.3	1.87	0.124
Q90Z10	60S ribosomal protein L13 OS=Danio rerio OX=7955 GN=rpl13 PE=2 SV=3	1	483358	0	597614	2.19879e+06	630606	0	959184	968788	863772	637107	1.02795e+06	2.22597e+06	1.44121e+06	3.3334e+06	1.18265e+06	891263	950387	862956	783177	619050	38.9	74	17.5	1.15	0.966
Q90ZE5	Fast muscle-specific myosin heavy chain (Fragment) OS=Danio rerio OX=7955 GN=myhz2 PE=2 SV=2	2	0	0	0	668939	666117	1.05725e+06	0	0	0	0	1.05828e+06	265910	850245	1.56166e+06	1.98759e+06	4.10326e+06	948083	357913	810481	875657	56.7	53.4	35.6	3.52	0.0711
Q92005	Elongation factor 1-alpha OS=Danio rerio OX=7955 GN=eef1a PE=2 SV=1	28	1.46556e+08	1.46555e+08	1.32514e+08	5.94616e+08	2.72152e+08	1.85118e+08	4.37806e+08	4.81554e+08	4.84496e+08	4.44155e+08	3.20625e+08	3.51988e+08	3.25697e+08	9.07478e+08	5.15951e+08	5.84488e+08	4.36374e+08	4.34227e+08	4.48598e+08	4.32803e+08	5.06	31.2	1.65	2.01	0.056
Q92051	Carbonic anhydrase OS=Danio rerio OX=7955 GN=cahz PE=1 SV=2	4	2.10476e+07	9.28119e+06	9.24582e+06	2.01544e+07	1.00923e+07	2.17778e+06	1.21479e+07	1.38403e+07	1.70454e+07	1.23665e+07	4.47616e+07	2.31245e+07	2.32865e+07	3.09004e+07	1.93034e+07	1.73462e+07	1.25323e+07	1.25557e+07	1.57407e+07	1.23481e+07	41	32.5	12.3	-1.35	0.376
Q9DD89	Cathepsin D enzyme OS=Danio rerio OX=7955 GN=ctsd PE=2 SV=1	1	2.79794e+06	1243692	0	53200336	4514116	0	9120863	10489757	9322437	7.52435e+06	5.95033e+06	3.05175e+06	4.87203e+06	8.06525e+07	8.46584e+06	6.56199e+07	9.03722e+06	9.34384e+06	8.45259e+06	7.3111e+06	31.7	73.8	10.5	11.2	0.093
Q9I8U7	Fast skeletal muscle myosin light polypeptide 3 OS=Danio rerio OX=7955 GN=mylz3 PE=1 SV=1	2	9.60455e+06	7.01774e+06	2342094	14381869	15965189	2.95147e+06	6300182	1.00722e+07	9088860	7.24864e+06	2.04258e+07	1.722e+07	6.51273e+06	2.21383e+07	3.04859e+07	9.081e+06	6.5312e+06	9.31739e+06	8.41659e+06	7.40791e+06	49.5	52.5	15.3	1.4	0.554
Q9MIY7	Cytochrome c oxidase subunit 2 OS=Danio rerio OX=7955 GN=mt-co2 PE=3 SV=1; Duplicate proteins: A0A0A0VG08|A0A0A0VG08_DANRE	2	8.41974e+06	1.10711e+07	1.20021e+07	7.17846e+06	1.27352e+07	3.69209e+06	3.79979e+06	4.55076e+06	2.22563e+06	1.98418e+06	1.79061e+07	2.7166e+07	2.89445e+07	1.08827e+07	2.38837e+07	1.13597e+07	3.76494e+06	4.05363e+06	3.21141e+06	3.2015e+06	24	47.9	11.9	-1.6	0.17
Q9PTR4	Alpha-cardiac actin OS=Danio rerio OX=7955 GN=actc1a PE=2 SV=1	9	1.57906e+08	133519681	1.40035e+08	1.01986e+09	9.37971e+07	6.06955e+07	2.23131e+08	2.31424e+08	2.22936e+08	2.48629e+08	3.36064e+08	4.21873e+08	3.39347e+08	1.46847e+09	1.79463e+08	1.8995e+08	2.22298e+08	2.0852e+08	2.03765e+08	2.42186e+08	13.3	121	7.86	1.67	0.987
Q9PU58	Protein NipSnap homolog 2 OS=Danio rerio OX=7955 GN=nipsnap2 PE=2 SV=2	3	816054	119797	1.23505e+06	0	1.00362e+06	0	1.31685e+06	1.0129e+06	493239	580915	1.86564e+06	2.47547e+06	2.97847e+06	1.19921e+06	2.99663e+06	1.89122e+06	1.30477e+06	1.20033e+06	1.05787e+06	1.09375e+06	22.8	44.7	9.58	-1.2	0.487
Q9PVF8	Catenin (Cadherin-associated protein), alpha OS=Danio rerio OX=7955 GN=ctnna1 PE=1 SV=1	64	15368539	1.35663e+07	1.54335e+07	3.615e+07	8.97588e+06	1.82631e+07	8.2127e+08	868594296	9.03715e+08	8.1857e+08	6.64647e+07	5.10093e+07	8.96821e+07	8.52006e+07	7.42594e+07	9.63938e+07	8.19445e+08	7.89443e+08	8.2926e+08	8.0588e+08	28.2	13	2.13	1.24	0.292
Q9PVK4	L-lactate dehydrogenase B-A chain OS=Danio rerio OX=7955 GN=ldhba PE=2 SV=4	10	2.41069e+07	1.63676e+07	2.84905e+07	1.32798e+08	7.66769e+07	2.02291e+07	5.74729e+07	53319661	6.10896e+07	6.20859e+07	5.27847e+07	4.18834e+07	7.60535e+07	2.03147e+08	1.3416e+08	6.71744e+07	5.76963e+07	4.81193e+07	5.61056e+07	6.12861e+07	30.7	50.4	9.97	2.37	0.116
R4GE02	Uncharacterized protein OS=Danio rerio OX=7955 GN=si:ch211-113a14.11 PE=1 SV=1	4	5.58984e+06	35484080	2.14949e+07	3.8734e+08	2.3098e+07	1.25258e+07	54779525	5.96275e+07	61426553	5.63228e+07	7.30204e+07	7.22804e+07	5.19906e+07	5.87213e+08	4.33183e+07	6.7415e+07	5.42772e+07	5.31137e+07	5.5695e+07	5.47266e+07	18.1	132	1.97	3.54	0.528
T1ECV2	Myosin light chain kinase 3 OS=Danio rerio OX=7955 GN=mylk3 PE=4 SV=2	45	3.48619e+07	6.3812e+07	2.57527e+07	8.55303e+07	2.56912e+07	4.54889e+07	1.58562e+08	1.35132e+08	1.67267e+08	1.33176e+08	8.92975e+07	1.73872e+08	9.54959e+07	1.46552e+08	7.2259e+07	1.65054e+08	1.64674e+08	1.29843e+08	1.62074e+08	1.35186e+08	39.4	38.4	12.2	1.07	0.878
U3JAM7	Synaptopodin 2-like b OS=Danio rerio OX=7955 GN=synpo2lb PE=4 SV=1	39	2.08334e+07	4.32355e+07	2.8009e+07	45833123	2.25222e+07	2.5242e+07	3.07979e+08	3.96027e+08	4.06097e+08	3.54083e+08	6.20885e+07	1.21259e+08	8.38516e+07	8.94961e+07	6.46247e+07	9.7638e+07	3.08959e+08	3.5664e+08	3.71935e+08	3.4442e+08	33.6	20.5	7.77	-1.06	0.881
U3JB13	Actin-binding LIM protein 1b OS=Danio rerio OX=7955 GN=ablim1b PE=4 SV=1	5	0	0	0	0	0	0	8.58708e+06	4.66769e+06	3.0763e+06	6.1851e+06	3.29727e+06	2.82723e+06	1.7601e+06	2.4056e+06	3.35586e+06	2.9734e+06	8.85227e+06	6.02214e+06	5.42615e+06	6.33294e+06	30	16.4	22.7	1.11	0.593
X1WC76	Si:dkey-108k21.24 (Fragment) OS=Danio rerio OX=7955 GN=si:dkey-108k21.24 PE=3 SV=1	2	10167976	1.21548e+07	0	252441224	1.29743e+07	6.46269e+06	34118078	44128387	4.1113e+07	38485980	2.16241e+07	2.98253e+07	2.16249e+07	3.82705e+08	2.43322e+07	5.0207e+07	3.38052e+07	3.93077e+07	3.72768e+07	3.73952e+07	19.4	131	6.2	6.26	0.291
X1WCH5	Zinc finger protein 839 OS=Danio rerio OX=7955 GN=znf839 PE=1 SV=1	1	0	0	0	0	0	0	0	0	0	0	304768	333971	223879	544644	708900	707203	121630	506397	152351	224509	19.8	14.4	69.9	2.27	0.00679
X1WE18	KN motif and ankyrin repeat domains 2 OS=Danio rerio OX=7955 GN=kank2 PE=4 SV=1	19	4.54694e+06	933437	2.211e+06	3.52387e+06	3.63546e+06	2.66913e+06	2.71919e+07	2.88516e+07	2.8669e+07	3.19073e+07	1.60382e+07	1.34306e+07	1.49475e+07	1.35056e+07	1.45334e+07	1.78904e+07	3.11597e+07	3.12778e+07	3.26224e+07	3.42927e+07	8.85	15	4.52	1.03	0.787
X1WF03	Baculoviral IAP repeat-containing 6 OS=Danio rerio OX=7955 GN=birc6 PE=1 SV=1	7	5.07047e+06	0	3030913	3.46003e+06	0	0	3.71977e+06	4.14094e+06	4.19205e+06	3.33709e+06	1.4441e+07	1.0683e+07	9.27704e+06	8.6794e+06	4.78765e+06	4.11559e+06	5.52164e+06	4.91092e+06	4.81892e+06	5.11157e+06	23.3	42	6.13	-1.96	0.0693
X1WFS0	Obscurin, cytoskeletal calmodulin and titin-interacting RhoGEF b (Fragment) OS=Danio rerio OX=7955 GN=obscnb PE=4 SV=2	1	7356223	6.3916e+06	5954936	5768483	3.53943e+06	2754684	7.30053e+06	6.26211e+06	5123430	4.03288e+06	1.56444e+07	1.56836e+07	1.4361e+07	8.74511e+06	6.6379e+06	8.47554e+06	7.23358e+06	5.57803e+06	4.64538e+06	3.91858e+06	4.94	14.4	26.8	-1.91	0.0109
X1WGM1	Histone H4 (Fragment) OS=Danio rerio OX=7955 GN=zgc:163040 PE=1 SV=1	8	9.3141e+06	1.338e+07	3.16114e+06	6.83033e+08	1.62543e+07	6.83331e+06	6.06924e+07	6.79694e+07	6.81325e+07	65453151	2.06502e+07	3.42771e+07	5.10393e+07	9.55006e+08	3.26072e+07	2.33347e+07	6.12446e+07	6.07191e+07	6.19897e+07	6.37611e+07	43.1	159	2.14	9.54	0.49
