# Supplementary figures and images for: In vivo proximity labeling identifies cardiomyocyte protein networks during zebrafish heart regeneration
Source: eLife journal article supplement (doi:10.7554/elife.66079), 2021-03-25

**A**BirA2-GFPBirA2-GFP-CAAX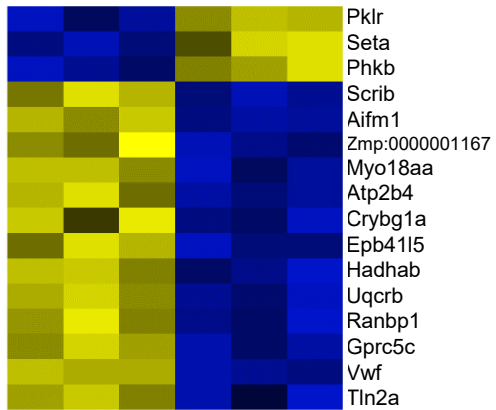

log10

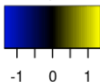**B****Talin 2****Talin 2****Talin 2****WGA****Tnnt****Uninjured**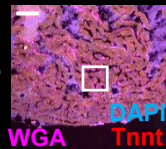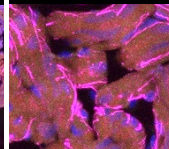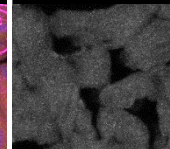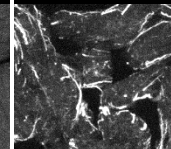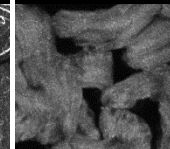**14 dpa**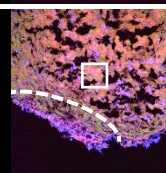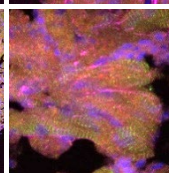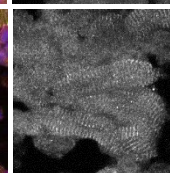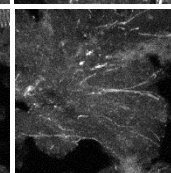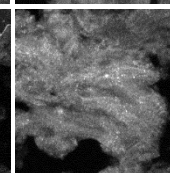**C****Seta****14 dpi**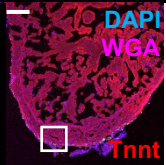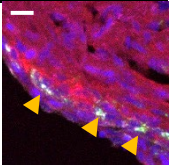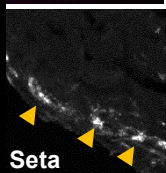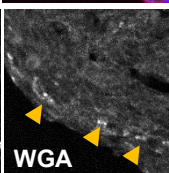

Supplement: supp [file elife-66079-supp-v1.zip]

**A**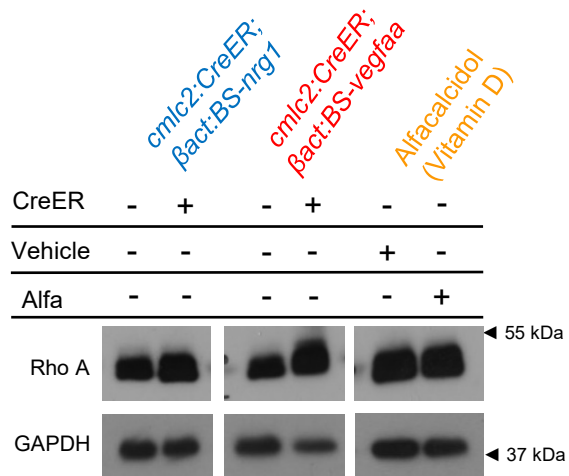**B**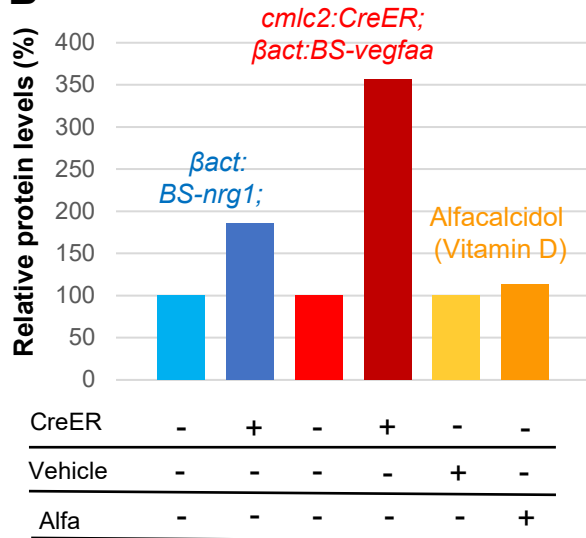

Supplement: supp [file elife-66079-supp-v1.zip]

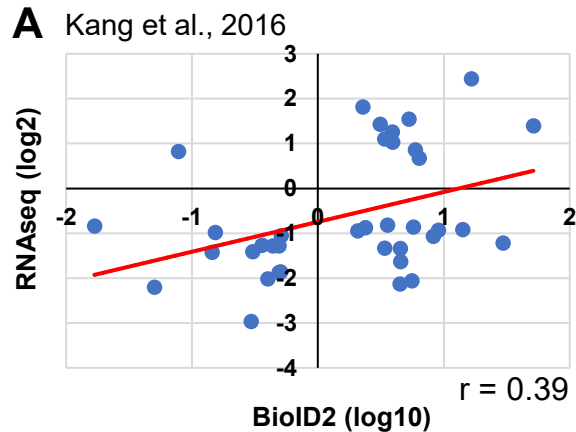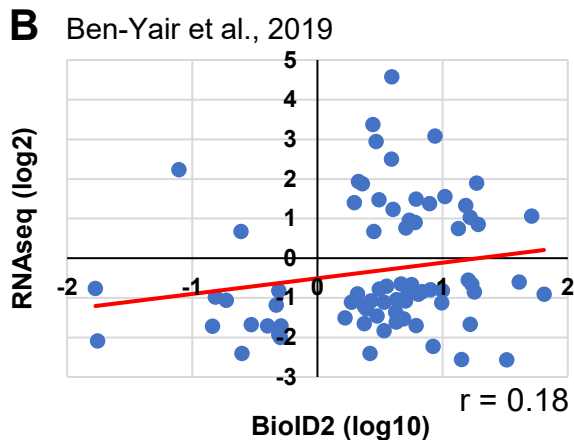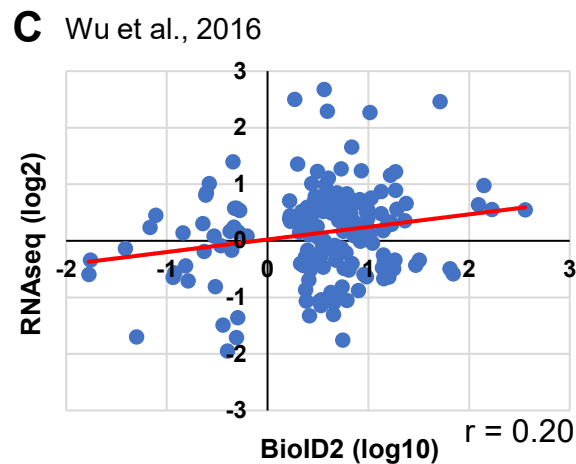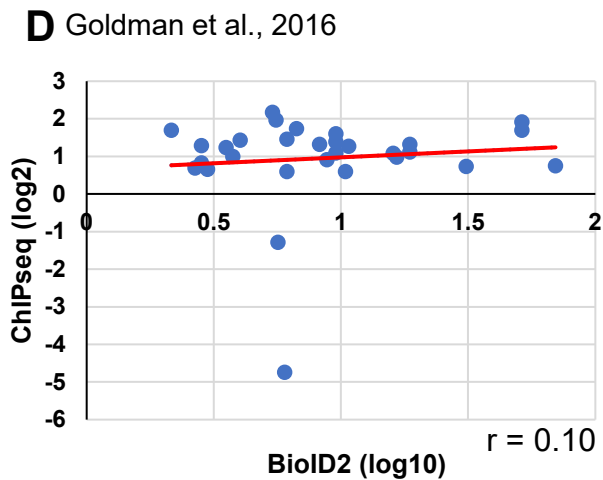

Supplement: supp [file elife-66079-supp-v1.zip]

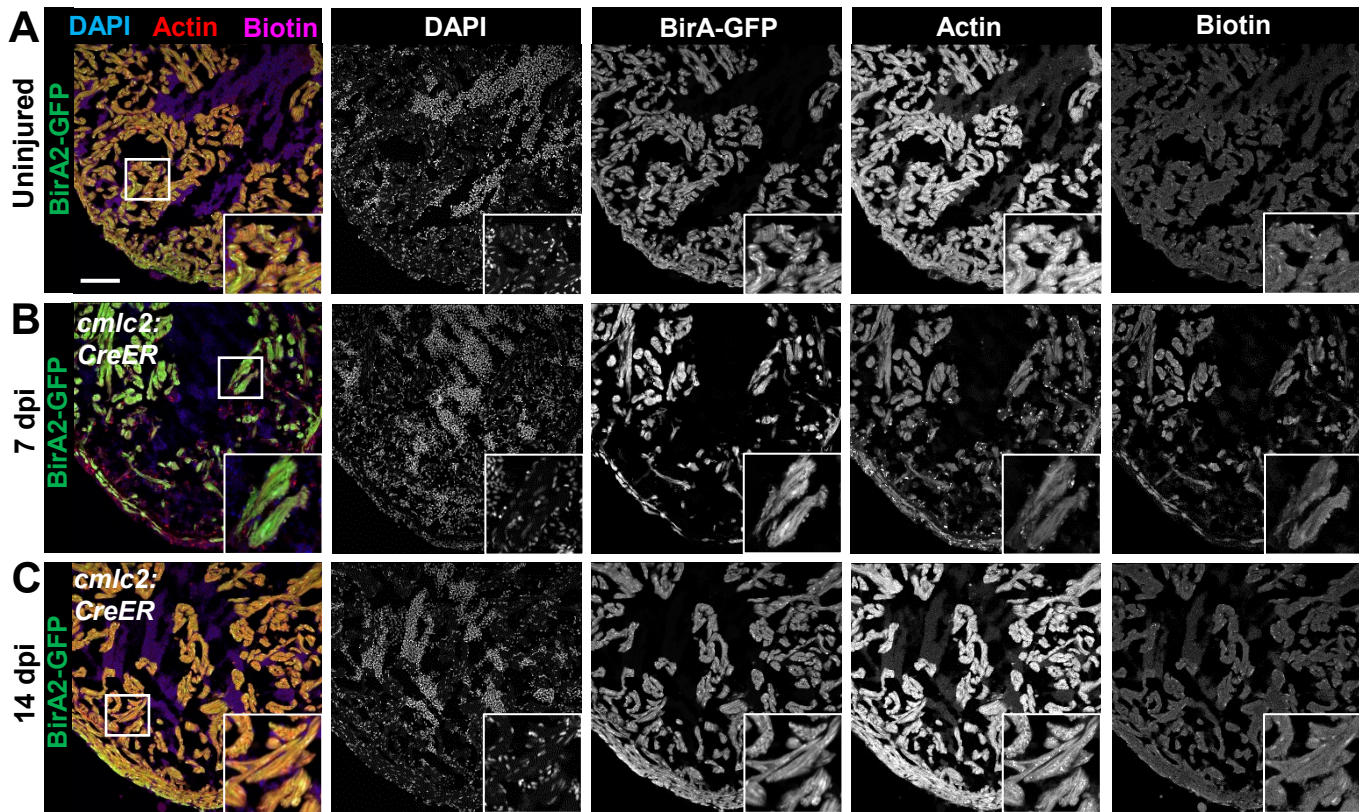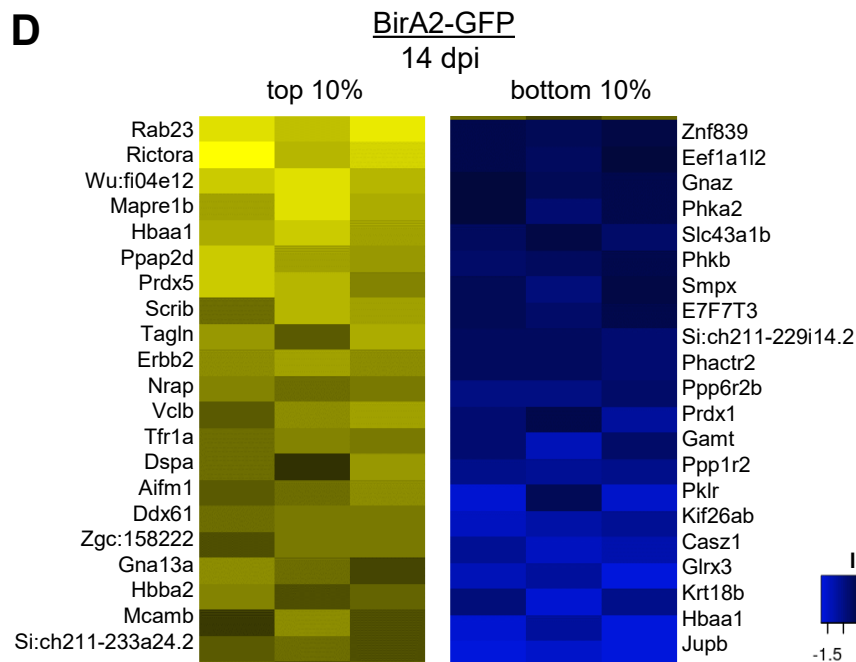

Supplement: supp [file elife-66079-supp-v1.zip]

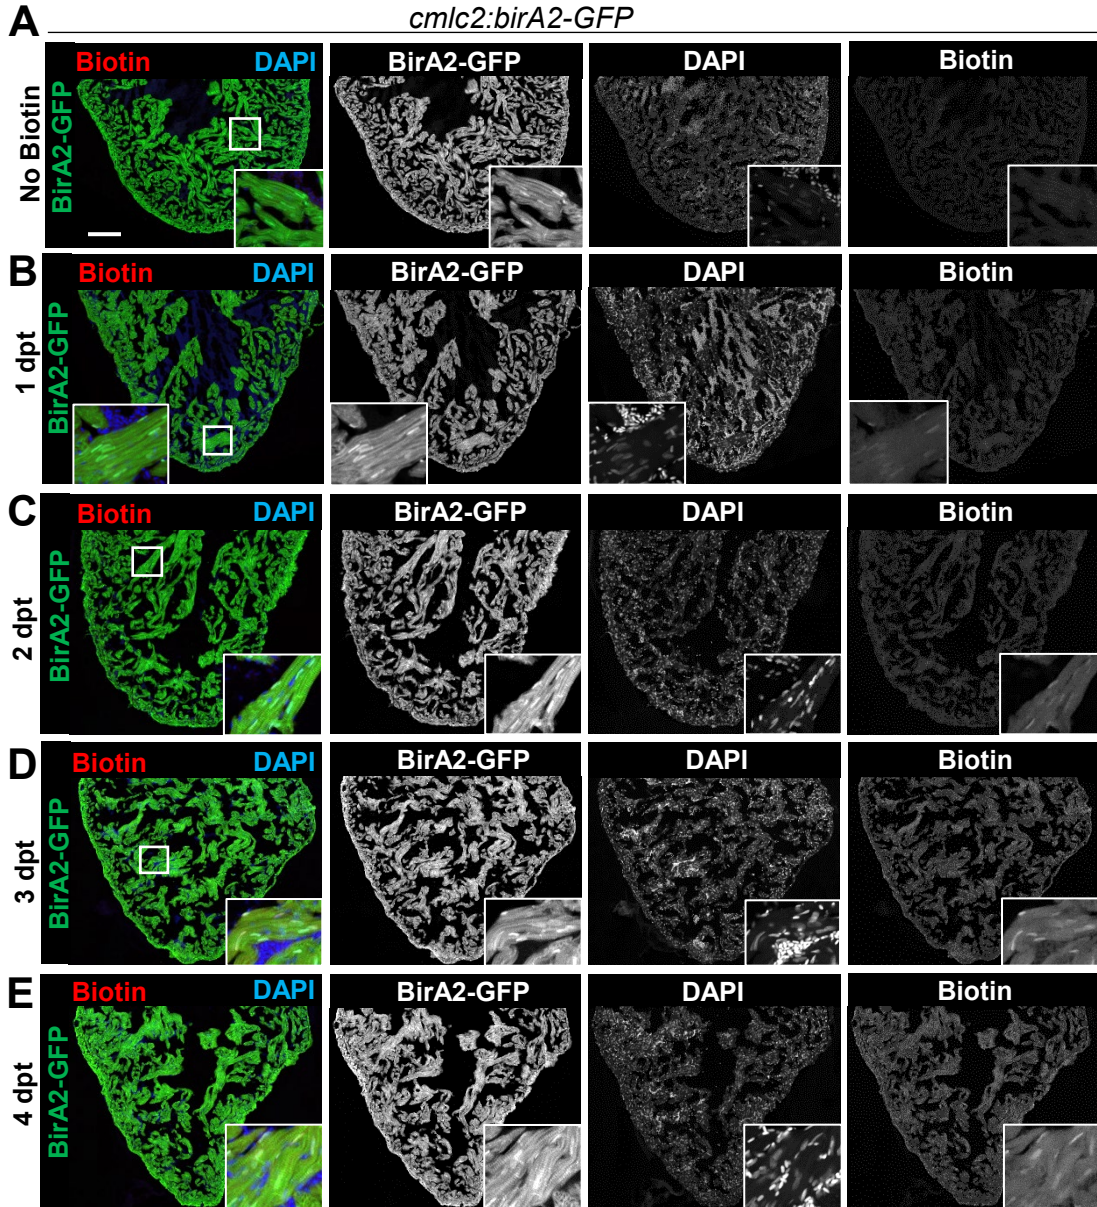

Supplement: supp [file elife-66079-supp-v1.zip]

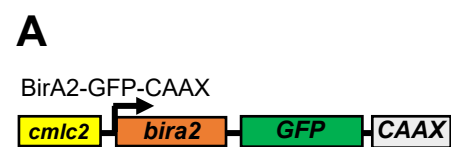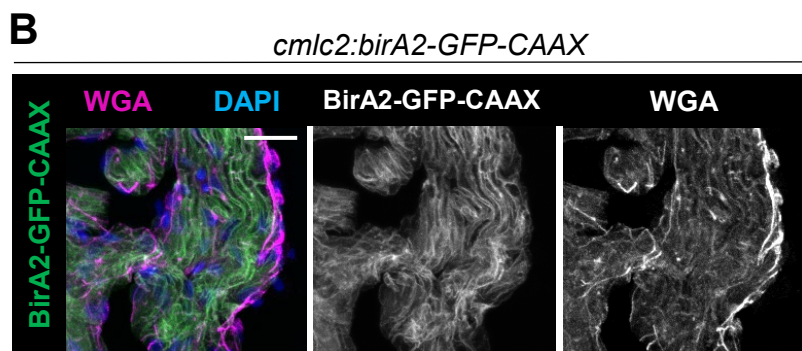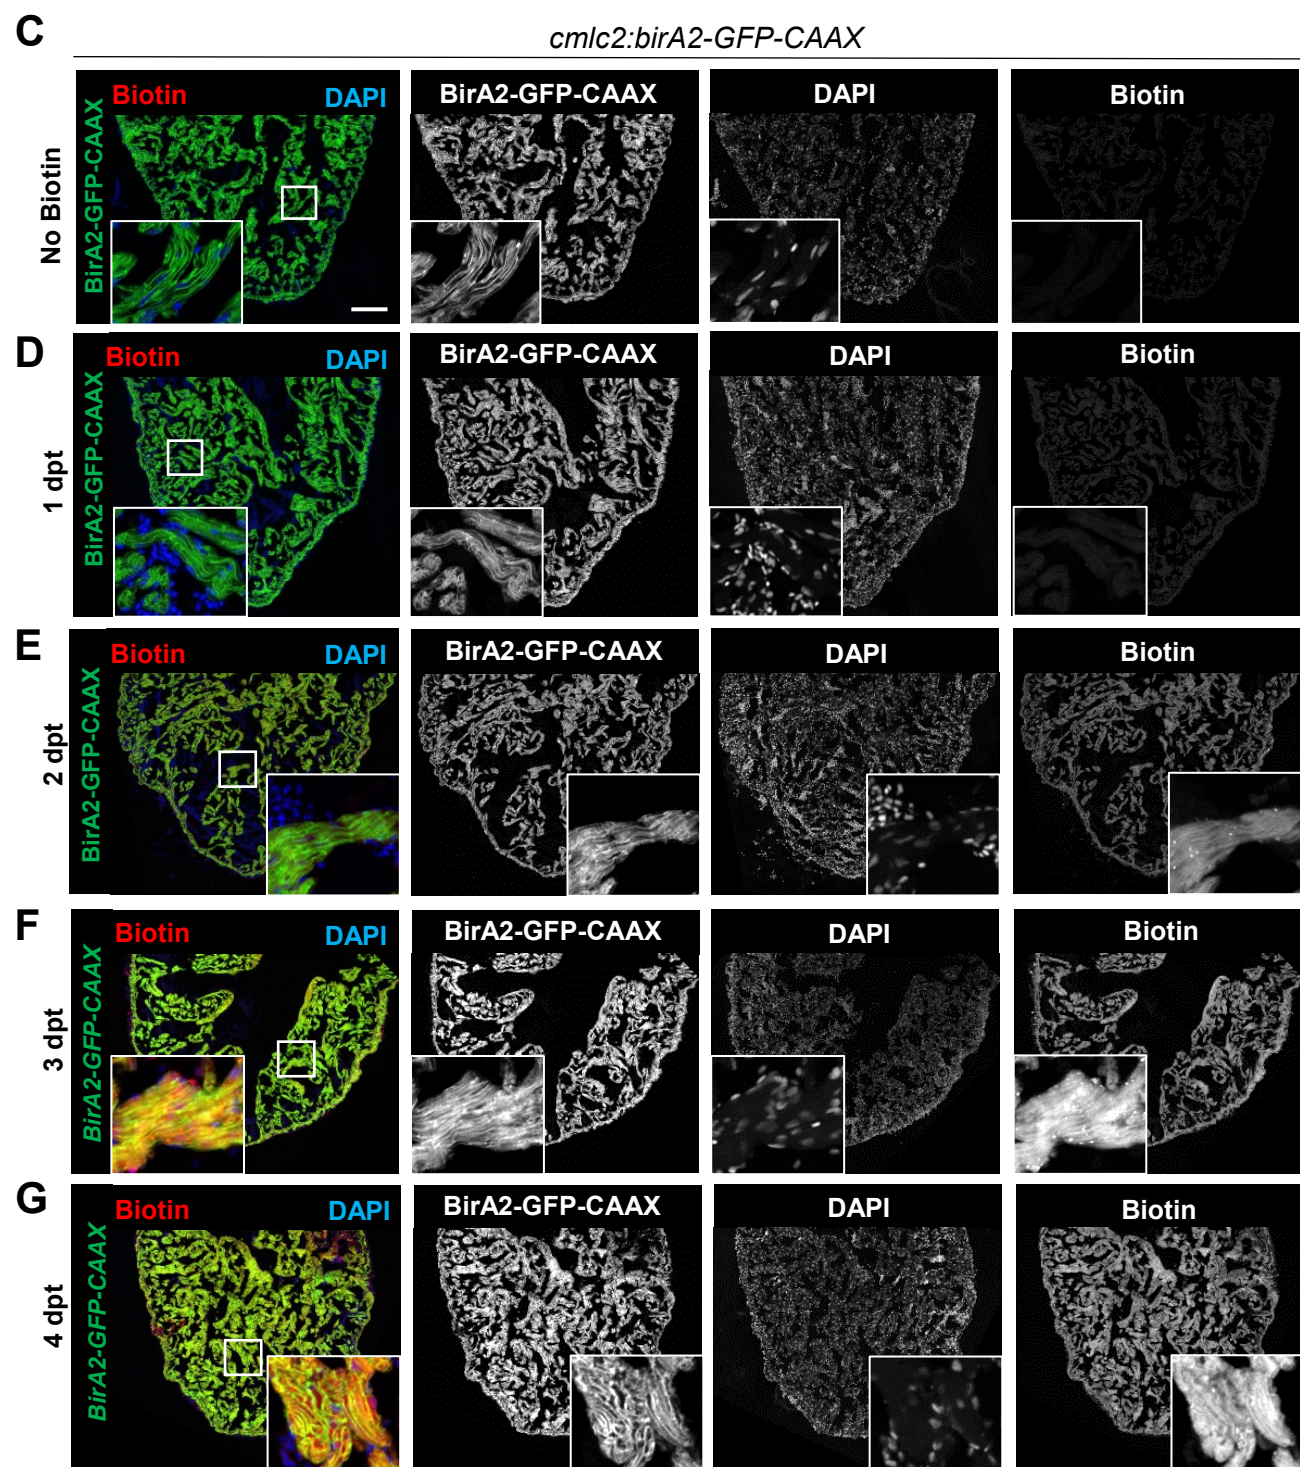

Supplement: supp [file elife-66079-supp-v1.zip]

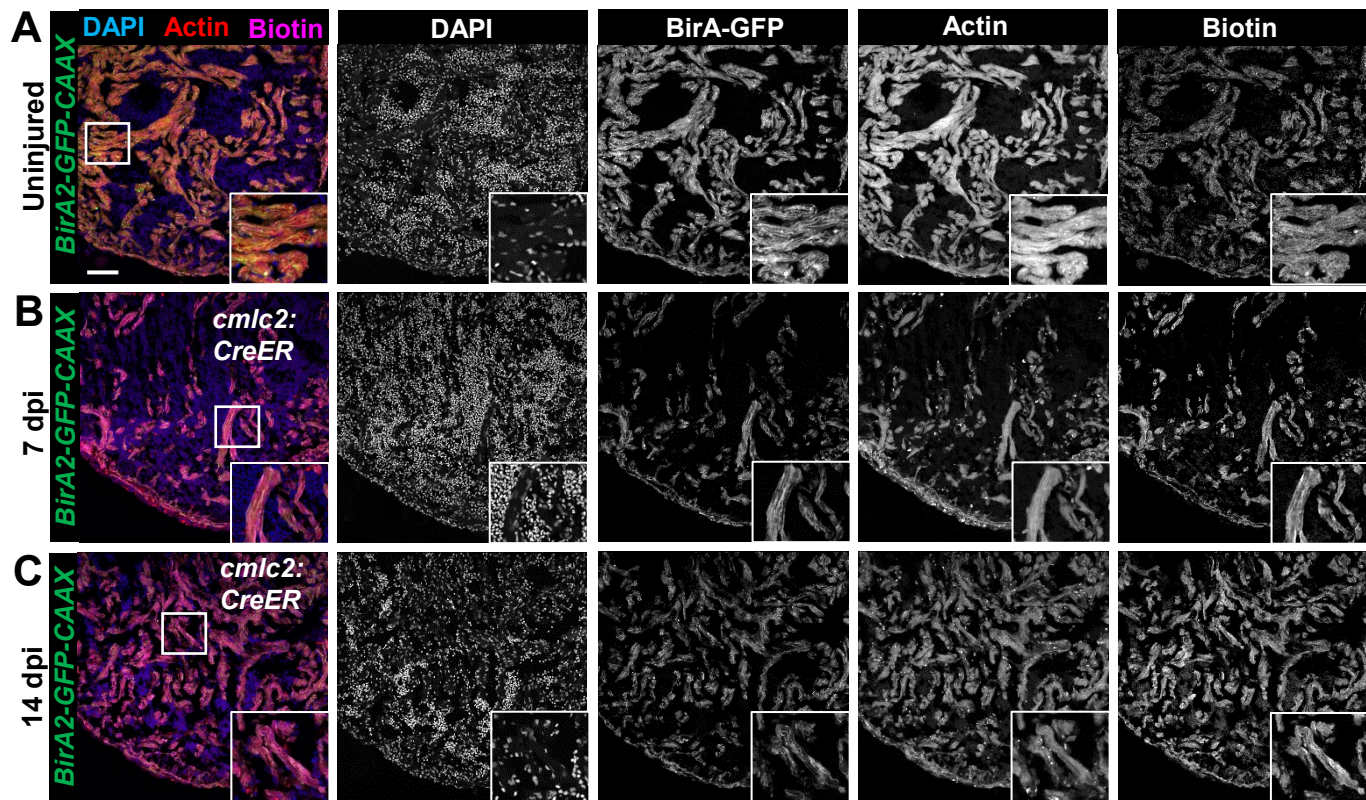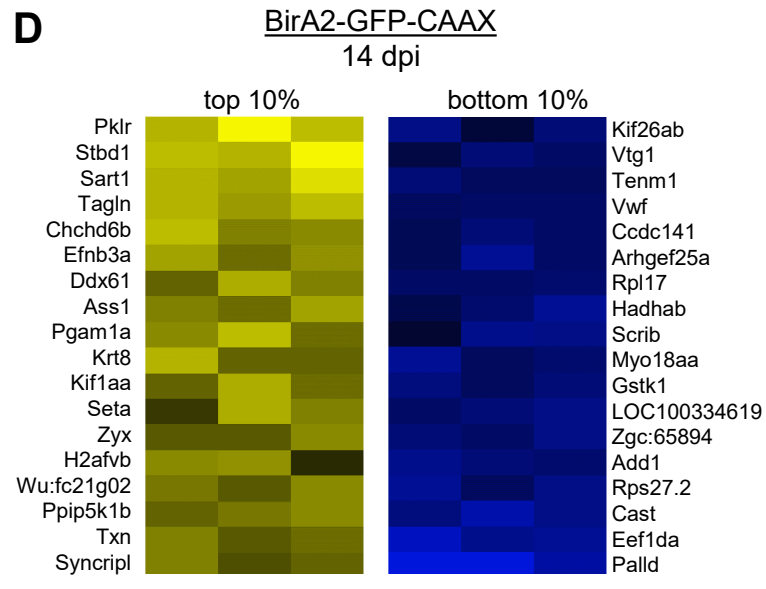

Supplement: supp [file elife-66079-supp-v1.zip]

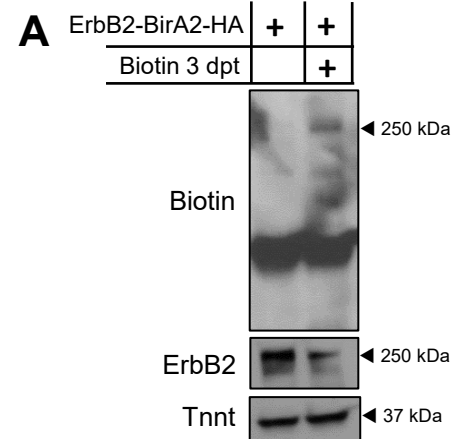

*cm1c2:erbB2-birA2-HA-P2A-GFP X ZCAT*

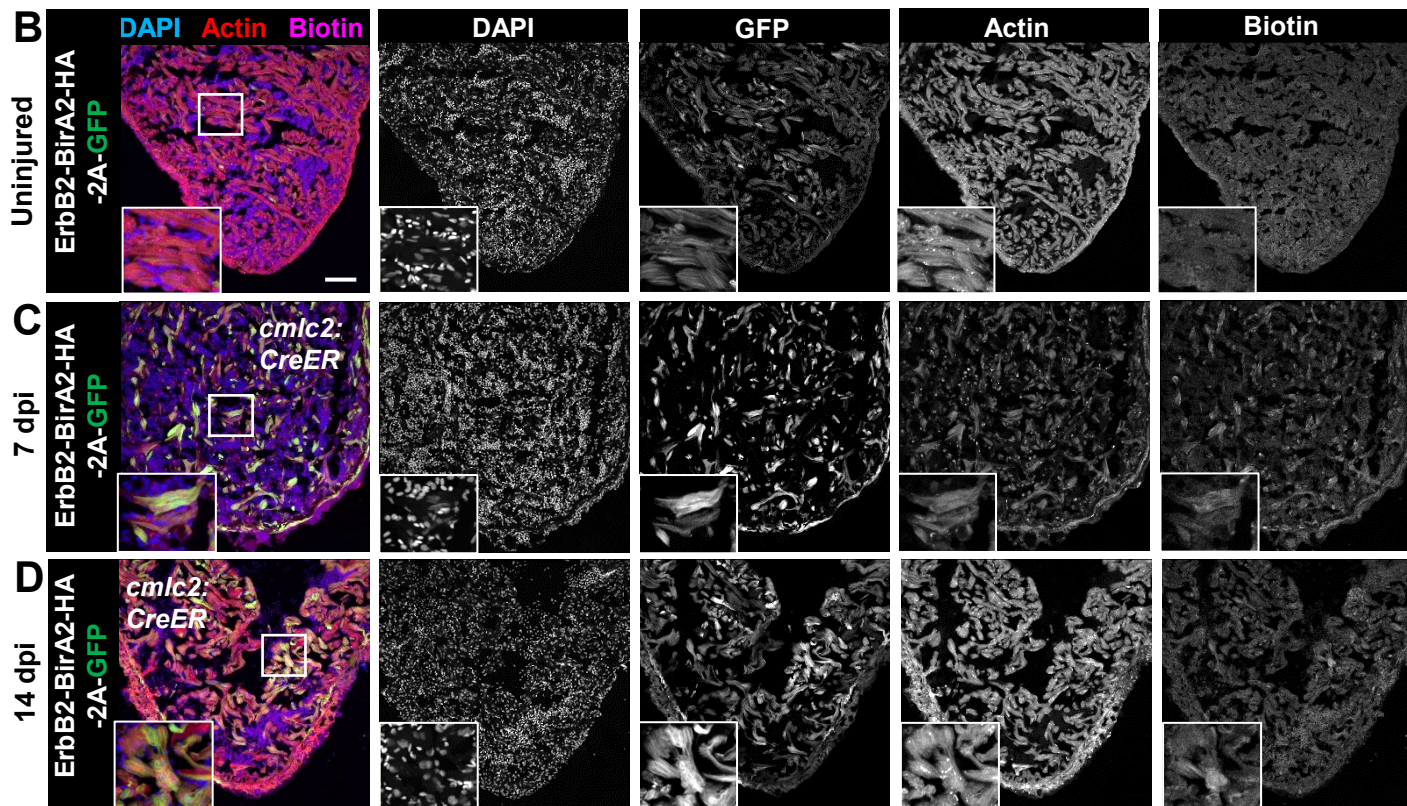

Supplement: supp [file elife-66079-supp-v1.zip]

**A**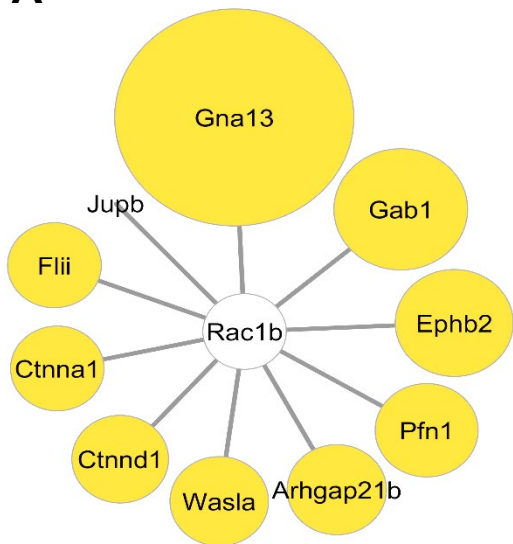**B**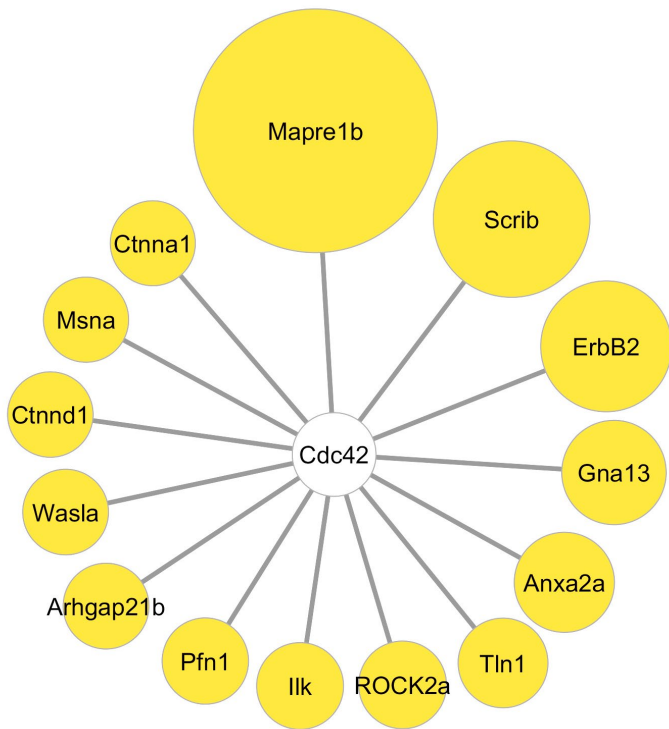

Supplement: supp [file elife-66079-supp-v1.zip]
